# Supplementary material for: Trifunctional cross-linker for mapping protein-protein interaction networks and comparing protein conformational states
Source: eLife journal article supplement (doi:10.7554/elife.12509), 2016-03-03
Supplement: supp [file elife-12509-supp-v1.zip]

Archive with 29 entries (29 files):
- elife_poa_e12509_Figure_4_source_data_2.xlsx
- elife_poa_e12509_Figure_3_source_data_1.xlsx
- elife_poa_e12509_Figure_3_source_data_2.xlsx
- elife_poa_e12509_Figure_1_figure_supplement_6.pdf
- elife_poa_e12509_Figure_7_figure_supplement_1.pdf
- elife_poa_e12509_Figure_4_source_data_1.xlsx
- elife_poa_e12509_Figure_1_figure_supplement_2.pdf
- elife_poa_e12509_Figure_7_source_data_1.xlsx
- elife_poa_e12509_Figure_5_figure_supplement_2.pdf
- elife_poa_e12509_Figure_4_source_data_4.xlsx
- elife_poa_e12509_Figure_1_figure_supplement_5.pdf
- elife_poa_e12509_Figure_5_source_data_1.xlsx
- elife_poa_e12509_Figure_1_figure_supplement_1.pdf
- elife_poa_e12509_Figure_3_figure_supplement_1.pdf
- elife_poa_e12509_Figure_4_figure_supplement_4.pdf
- elife_poa_e12509_Figure_5_figure_supplement_3.pdf
- elife_poa_e12509_Figure_1_figure_supplement_3.pdf
- elife_poa_e12509_Figure_4_figure_supplement_6.pdf
- elife_poa_e12509_Figure_4_figure_supplement_1.pdf
- elife_poa_e12509_Figure_4_figure_supplement_2.pdf
- elife_poa_e12509_Figure_5_source_data_2.xlsx
- elife_poa_e12509_Figure_5_source_data_4.xlsx
- elife_poa_e12509_Figure_5_figure_supplement_1.pdf
- elife_poa_e12509_Figure_4_figure_supplement_3.pdf
- elife_poa_e12509_Figure_1_figure_supplement_4.pdf
- elife_poa_e12509_Figure_5_source_data_3.xlsx
- elife_poa_e12509_Figure_4_figure_supplement_5.pdf
- elife_poa_e12509_Figure_8_source_data_1.xlsx
- elife_poa_e12509_Figure_4_source_data_3.xlsx
