# Supplementary material for: Trifunctional cross-linker for mapping protein-protein interaction networks and comparing protein conformational states
Source: eLife journal article supplement (doi:10.7554/elife.12509), 2016-03-03
Supplement: supp [file elife-12509-supp-v1.zip › elife_poa_e12509_Figure_1_figure_supplement_2.pdf]

**A**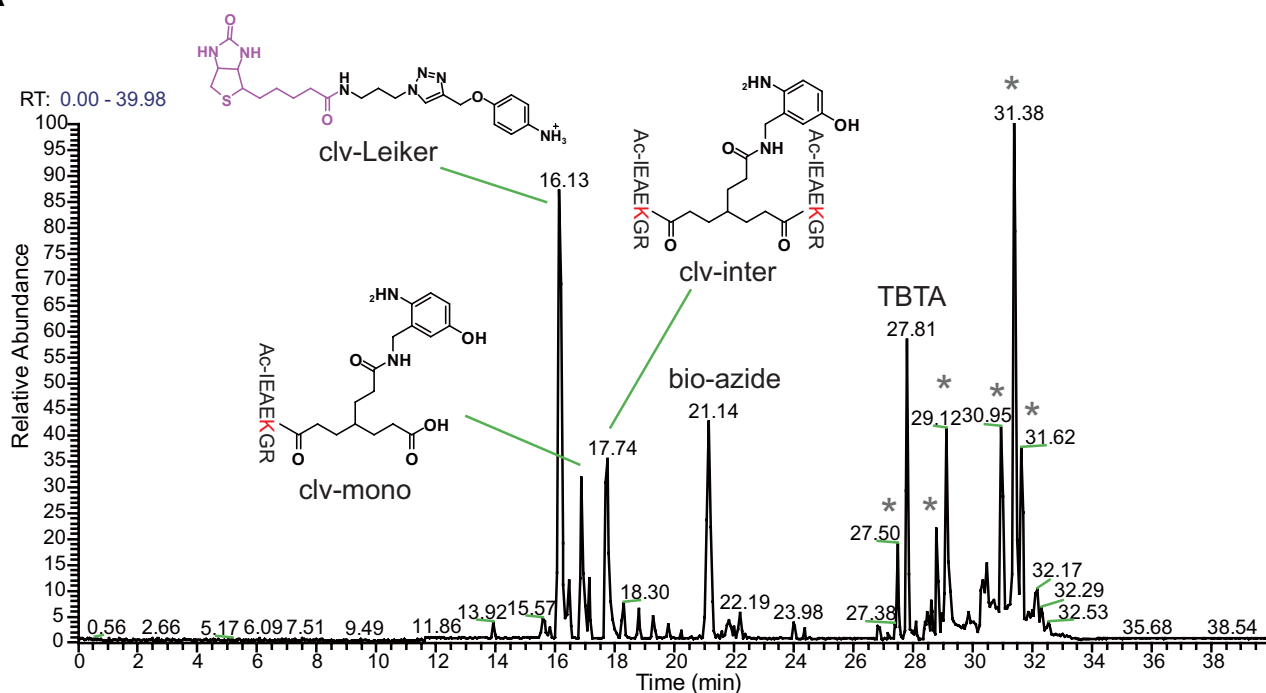**B**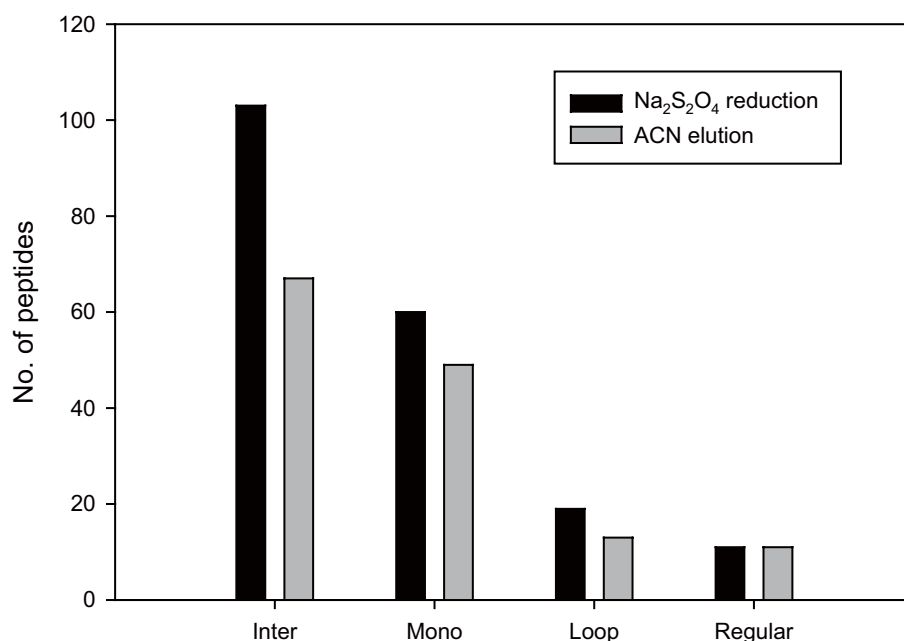

**Figure 1—figure supplement 2. Evaluation of azobenzene-based chemical cleavage.** (A) Complete cleavage of biotinylated AL-linked peptides. Ac-IR7, a model peptide with an acetylated N-terminus (Vellucci et al., 2010) was cross-linked using AL, and then subjected to click chemistry followed by azobenzene cleavage. Asterisks indicate non-peptide contaminants. (B) Azobenzene-based chemical cleavage is more efficient than acetonitrile elution using BSA as the test sample.
