# Supplementary material for: Trifunctional cross-linker for mapping protein-protein interaction networks and comparing protein conformational states
Source: eLife journal article supplement (doi:10.7554/elife.12509), 2016-03-03
Supplement: supp [file elife-12509-supp-v1.zip › elife_poa_e12509_Figure_1_figure_supplement_3.pdf]

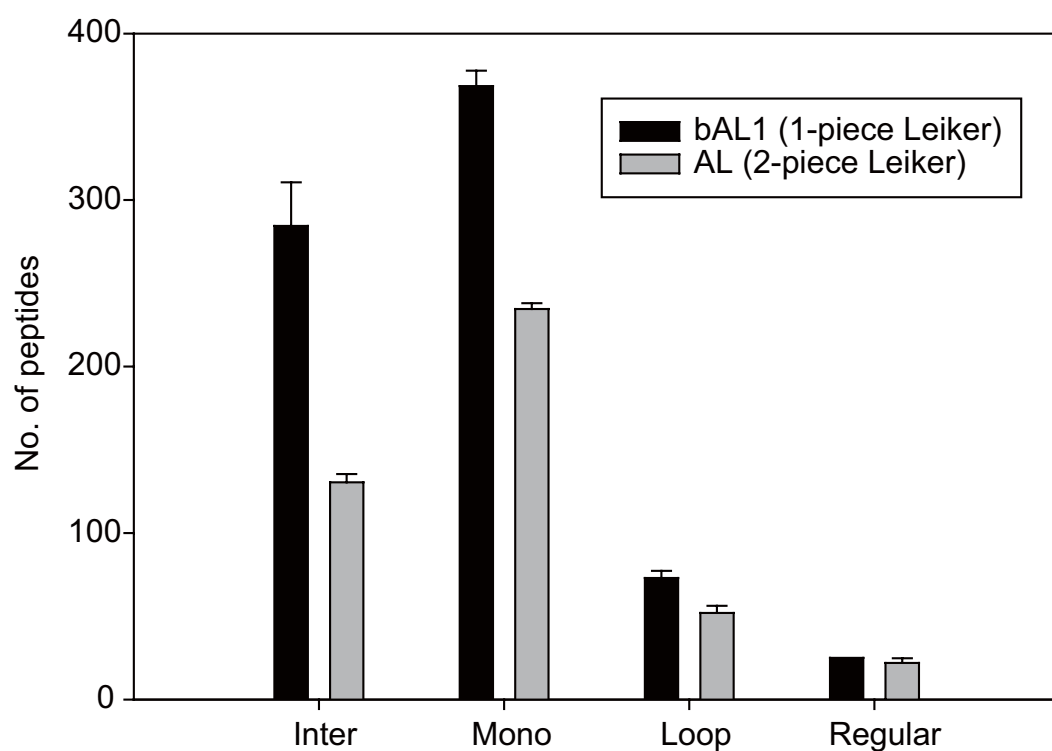

**Figure 1—figure supplement 3. The one-piece Leiker (bAL1) outperformed the two-piece Leiker (AL) in the CXMS analysis of a mixture of ten standard proteins.**
