# Supplementary material for: Trifunctional cross-linker for mapping protein-protein interaction networks and comparing protein conformational states
Source: eLife journal article supplement (doi:10.7554/elife.12509), 2016-03-03
Supplement: supp [file elife-12509-supp-v1.zip › elife_poa_e12509_Figure_1_figure_supplement_4.pdf]

**A**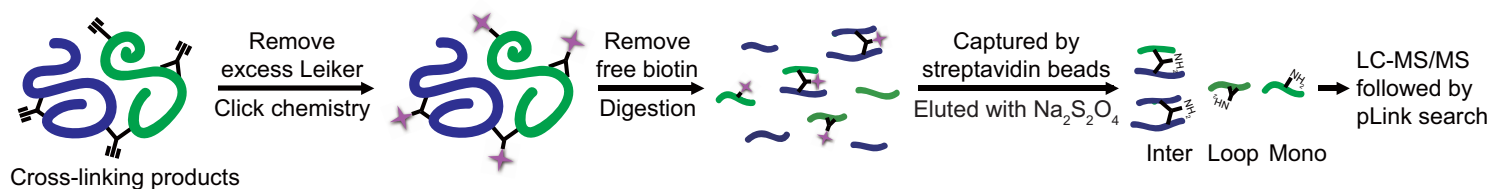**B**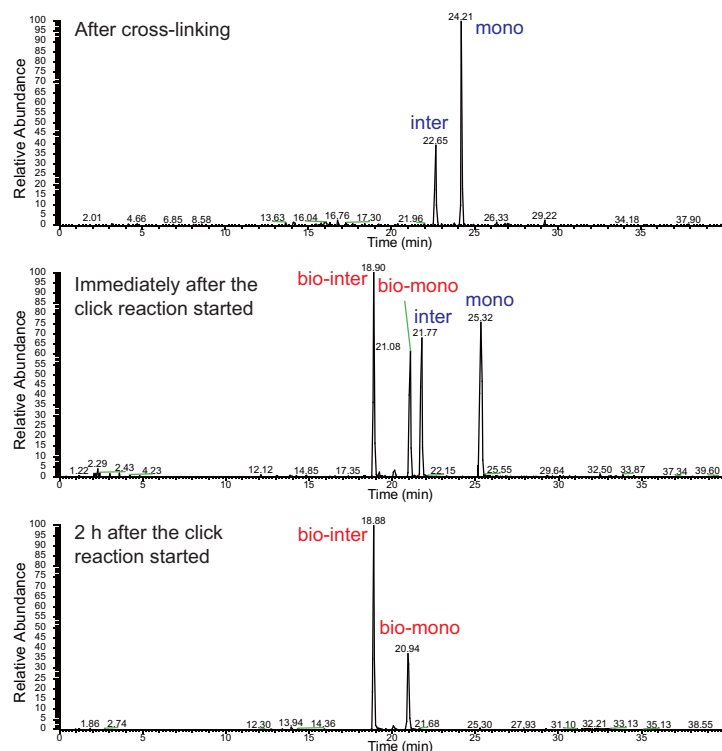**C**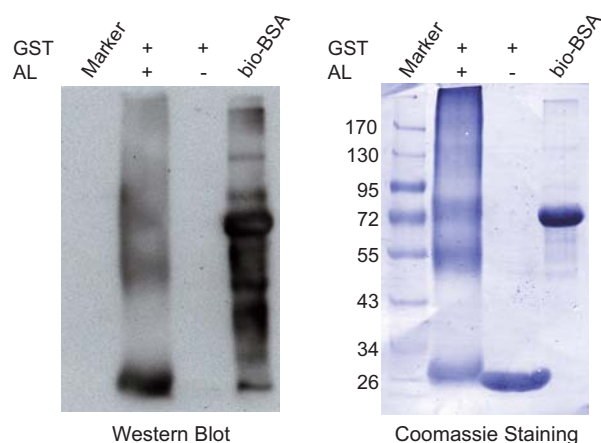**D**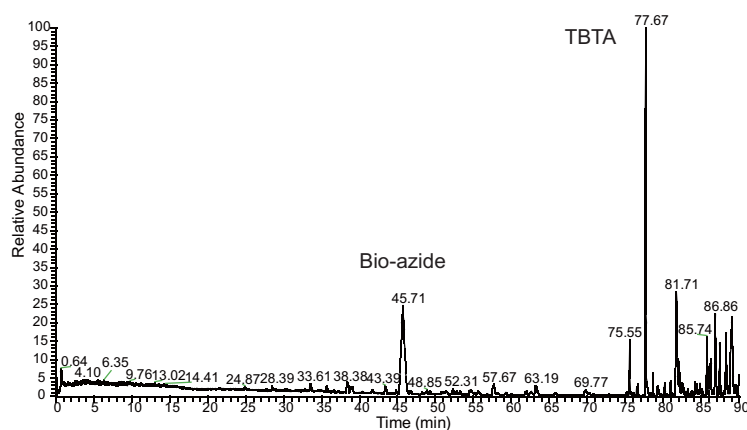**E**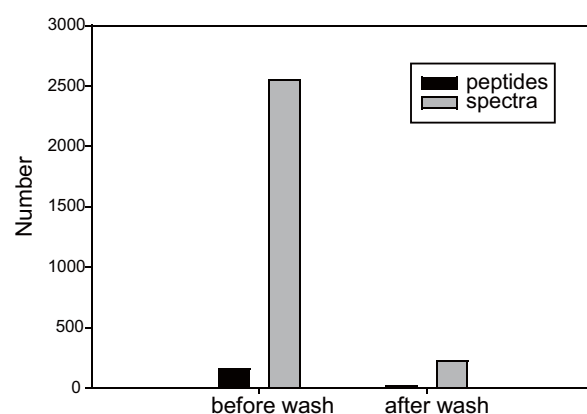

### Figure 1—figure supplement 4. Evaluation of the two piece Azo-Leiker (AL).

(A) The enrichment workflow. (B) AL-cross-linked Ac-IR7 was completely biotinylated via click chemistry. (C) Biotin was coupled to AL-cross-linked BSA via click chemistry, as detected by western blotting using streptavidin-HRP conjugates. (D) A large amount of the reactants (bio-azide and TBTA) remained after the click reaction as shown in the ion chromatogram. Digested AL-cross-linked immunoprecipitates of HA-tagged Rbp-9, a subunit of *Schizosaccharomyces pombe* RNA Polymerase II, were subjected to click reaction, digested with trypsin, and analyzed using LC-MS/MS. (E) After extensive washing to remove excess cross-linker and click chemistry reagents, peptide identifications decreased dramatically.
