# Supplementary material for: Trifunctional cross-linker for mapping protein-protein interaction networks and comparing protein conformational states
Source: eLife journal article supplement (doi:10.7554/elife.12509), 2016-03-03
Supplement: supp [file elife-12509-supp-v1.zip › elife_poa_e12509_Figure_1_figure_supplement_5.pdf]

**A** Cross-linked ten-protein mixture diluted 10-fold with *E. coli* peptides

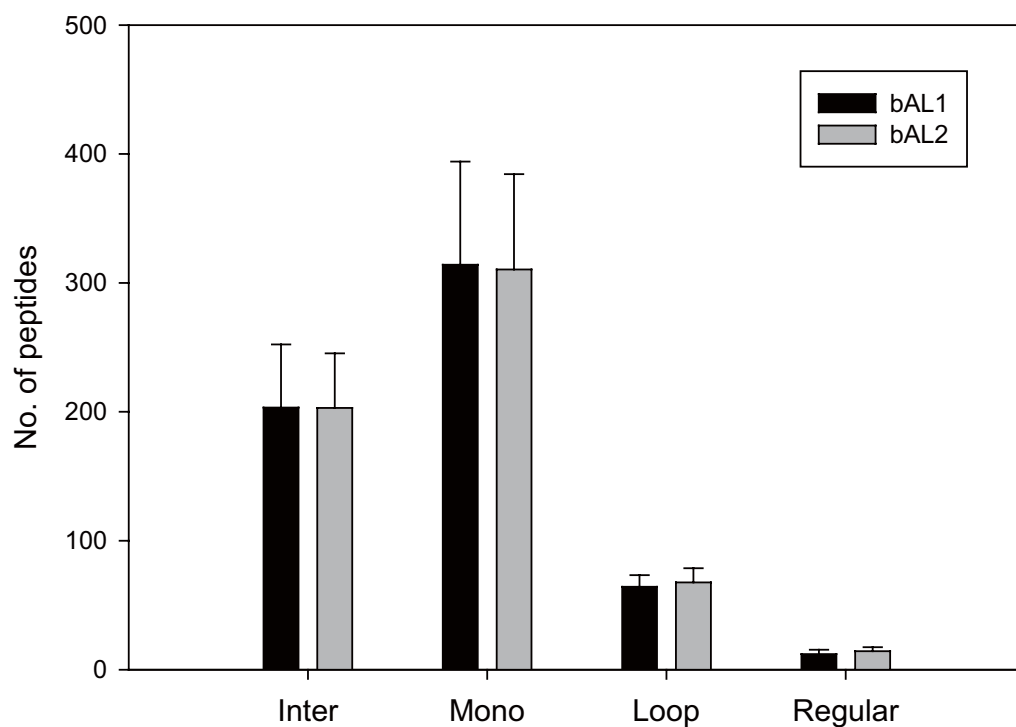

**B** 70S ribosome

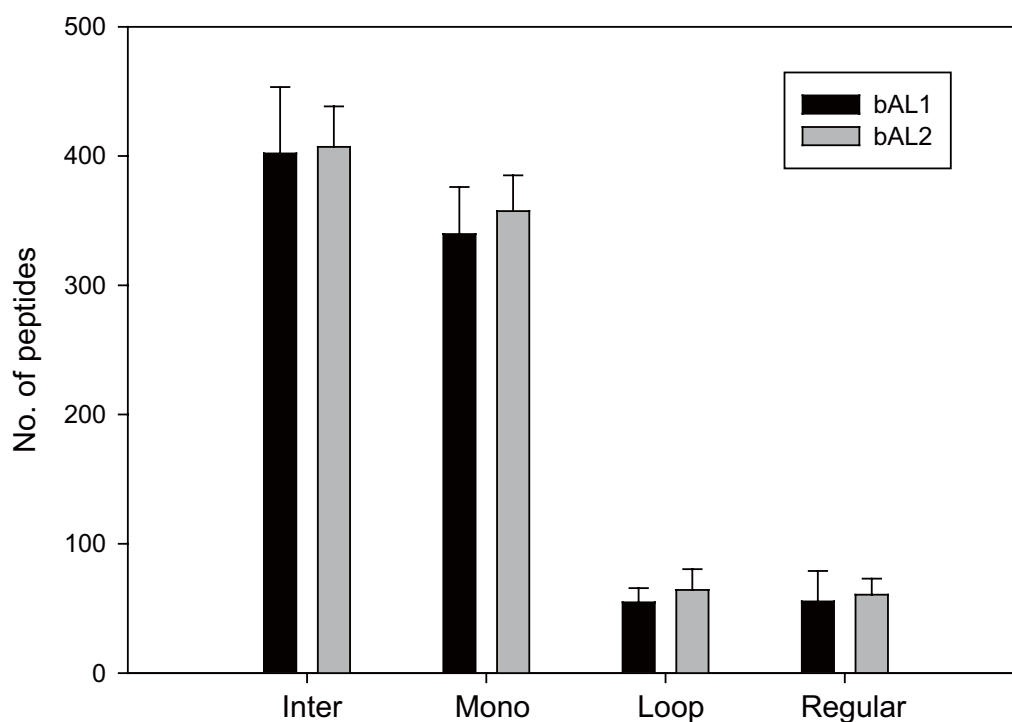

**Figure 1—figure supplement 5. bAL1 and bAL2 performed similarly on (A) the cross-linked ten-protein mixture diluted 10-fold with the tryptic digest of a non-cross-linked *E. coli* lysate and (B) the 70S ribosome.**
