# Supplementary material for: Trifunctional cross-linker for mapping protein-protein interaction networks and comparing protein conformational states
Source: eLife journal article supplement (doi:10.7554/elife.12509), 2016-03-03
Supplement: supp [file elife-12509-supp-v1.zip › elife_poa_e12509_Figure_3_figure_supplement_1.pdf]

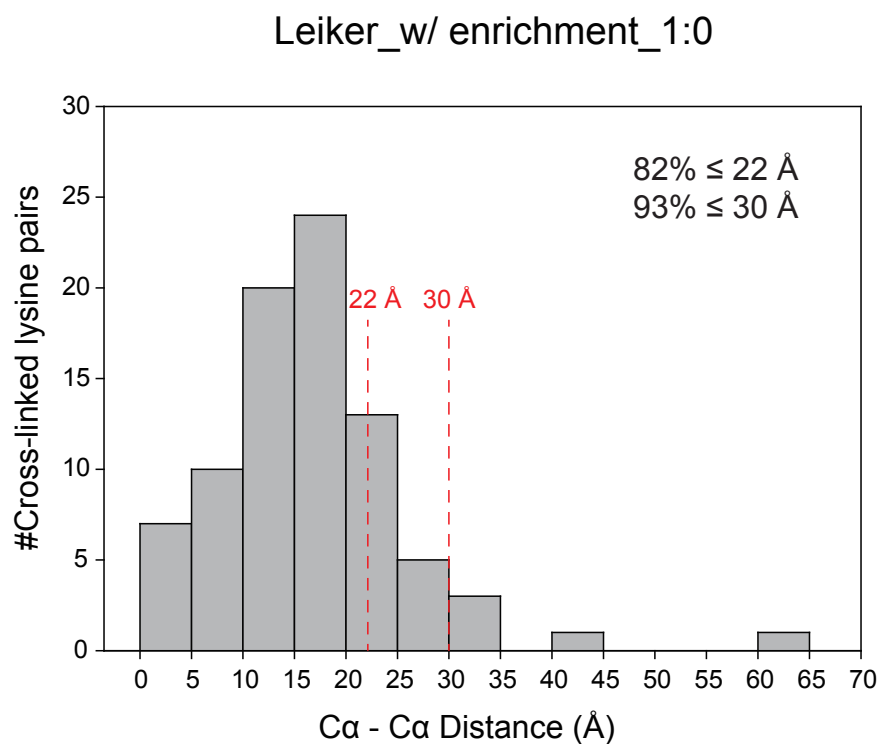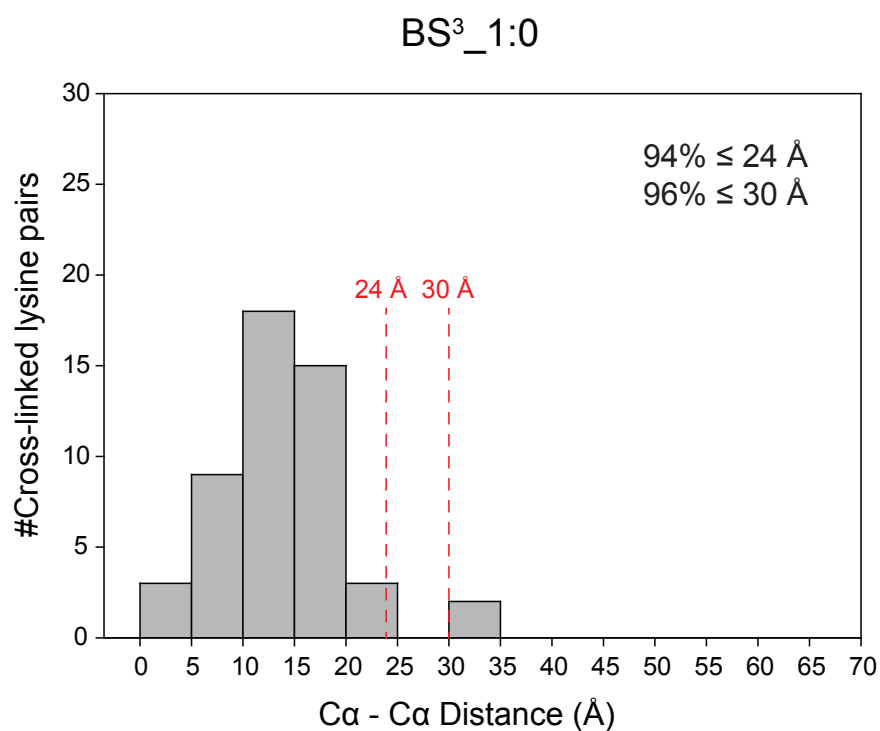

**Figure 3—figure supplement 1. Distance distributions of cross-linked lysine pairs in the undiluted ten-protein mixture.**
