# Supplementary material for: Trifunctional cross-linker for mapping protein-protein interaction networks and comparing protein conformational states
Source: eLife journal article supplement (doi:10.7554/elife.12509), 2016-03-03
Supplement: supp [file elife-12509-supp-v1.zip › elife_poa_e12509_Figure_3_source_data_1.xlsx]

## Sheet: Sheet1
Figure 3—source data 1. Ten standard proteins used to evaluate Leiker, mixed at equal amounts by mass.
#	Protein Name	MW (kDa)	pdb code
1	RNase A	13.7	7RSA
2	Lysozyme	14.3	1LYZ
3	PUD-1/PUD-2 heterodimer	17/17	4JDE
4	GST	28	1Y6E
5	Aldolase	40	1ZAH
6	BSA	68	3V03
7	Lactoferrin	90	1CB6
8	β-galactosidase	116	1DP0
9	Mouse monoclonal Ab (2H+2L chains)	150	2RGS (H), 1P7K (L)
10	Myosin	480	n.a.
