# Supplementary material for: Trifunctional cross-linker for mapping protein-protein interaction networks and comparing protein conformational states
Source: eLife journal article supplement (doi:10.7554/elife.12509), 2016-03-03
Supplement: supp [file elife-12509-supp-v1.zip › elife_poa_e12509_Figure_3_source_data_2.xlsx]

## Sheet: Sheet1
Figure 3—source data 2. Summary of identified spectra from the ten-protein mixture
Protein1-Protein2	Peptide1-Peptide2	#Spec													Specific?	Ca - Ca Distance (Å)
		Total	BS3				Leiker
							w/o enrichment				w/ enrichment
			1:0	1:1	1:10	1:100	1:0	1:1	1:10	1:100	1:0	1:1	1:10	1:100
bsa(489)-bsa(228)	LCVLHEKTPVSEK(7)-CASIQKFGER(6)	140	15	14	10	0	12	13	0	0	19	19	19	19	√	13.5035
Ab_C_region(338)-Ab_C_region(361)	VVSTLPIQHQDWMSGKEFK(16)-IKGLVR(2)	128	15	12	10	0	12	11	2	0	15	19	16	16	√	n.a.
bsa(374)-bsa(235)	LAKEYEATLEECCAK(3)-ALKAWSVAR(3), LAKEYEATLEECCAKDDPHACYSTVFDK(3)-ALKAWSVAR(3)	118	13	9	4	0	11	12	5	0	15	18	17	14	√	13.5305
myosin_heavy(865)-myosin_heavy(871)	LKEALEKSEAR(7)-RKELEEK(2)	117	2	0	0	0	11	0	0	0	23	20	30	31	√	n.a.
Aldolase(41)-Aldolase(311)	GILAADESTGSIAKR(14)-ALQASALKAWGGK(8), GILAADESTGSIAKR(14)-ALQASALKAWGGKK(8)	114	20	13	9	0	7	7	0	0	14	15	14	15	√	12.7251
myosin_heavy(1390)-myosin_heavy(1392)	TEELEEAKKK(8)-KLAQR(1), TEELEEAKK(8)-KLAQR(1)	109	15	9	0	0	14	2	0	0	18	21	15	15	√	n.a.
bsa(463)-bsa(455)	CCTKPESER(4)-SLGKVGTR(4)	106	5	7	9	0	8	0	0	0	22	12	22	21	√	13.3565
bsa(263)-bsa(235)	LVTDLTKVHK(7)-ALKAWSVAR(3)	105	3	7	0	0	15	8	0	0	18	18	18	18	√	9.54106
myosin_heavy(72)-myosin_heavy(58)	TVTVKEDQVLQQNPPK(5)-EGGKVTAETEHGK(4), TVTVKEDQVLQQNPPKFDK(5)-EGGKVTAETEHGK(4)	104	20	3	0	0	8	3	0	0	17	18	18	17	√	n.a.
Ab_C_region(454)-Ab_C_region(460)	HEGLKNYYLK(5)-KTISR(1)	104	12	12	6	0	8	7	0	0	15	15	14	15	√	n.a.
Aldolase(199)-Aldolase(13)	YASICQQNGIVPIVEPEILPDGDHDLKR(27)-KELSDIAHR(1)	103	10	3	0	0	11	20	0	0	15	15	14	15	√	17.1967
lactoferrin(599)-lactoferrin(601)	LADFALLCLDGKR(12)-KPVTEAR(1)	97	10	10	9	1	10	5	0	0	13	14	10	15	√	6.64938
bsa(266)-bsa(235)	VHKECCHGDLLECADDR(3)-ALKAWSVAR(3), VHKECCHGDLLECADDRADLAK(3)-ALKAWSVAR(3)	94	13	0	0	0	9	2	0	0	17	18	18	17	√	10.5371
F15E11.14(130)-F15E11.14(21)	VEDHAQTTVIKVLEK(11)-VDIENKSDHVFK(6)	86	19	18	0	0	9	1	0	0	10	10	9	10	√	6.2453
bsa(463)-bsa(245)	CCTKPESER(4)-LSQKFPK(4)	73	9	10	0	0	7	0	0	0	10	11	13	13	√	19.8744
myosin_heavy(1363)-myosin_heavy(1374)	VLSKANSEVAQWR(4)-TKYETDAIQR(2)	72	10	10	0	0	8	5	0	0	9	10	10	10	√	n.a.
myosin_heavy(1451)-myosin_heavy(1444)	NFDKILAEWK(4)-SNAAAAALDKK(10)	70	8	4	0	0	2	0	0	0	14	14	14	14	√	n.a.
Aldolase(41)-Aldolase(1)	GILAADESTGSIAKR(14)-PHSHPALTPEQK(1)	68	3	0	0	0	8	5	0	0	15	12	13	12	√	33.0185
Aldolase(199)-Aldolase(12)	YASICQQNGIVPIVEPEILPDGDHDLKR(27)-PHSHPALTPEQKK(12)	66	7	0	0	0	10	2	0	0	10	13	11	13	√	15.1592
myosin_heavy(1106)-myosin_heavy(1109)	IEDEQALGSQLQKK(13)-LKELQAR(2)	64	8	8	0	0	5	2	0	0	10	9	10	12	√	n.a.
Ab_C_region(338)-Ab_C_region(32)	VVSTLPIQHQDWMSGKEFK(16)-KPGETVK(1)	64	0	0	0	0	10	4	0	0	15	10	12	13	√	n.a.
GST(125)-GST(11)	VDFLSKLPEMLK(6)-IKGLVQPTR(2)	64	0	0	0	0	3	1	0	0	15	15	15	15	√	23.5115
lactoferrin(353)-lactoferrin(625)	KSEEEVAAR(1)-MDKVER(3), KSEEEVAARR(1)-MDKVER(3)	64	13	5	5	0	5	0	0	0	9	10	8	9	√	18.4857
GST(27)-GST(2)	LLLEYLEEKYEEHLYER(9)-SPILGYWK(1)	55	9	0	0	0	5	0	0	0	9	12	10	10	√	6.32592
GST(27)-GST(191)	LLLEYLEEKYEEHLYER(9)-IEAIPQIDKYLK(9)	54	11	2	0	0	0	0	0	0	10	8	9	14	√	14.5293
bsa(263)-bsa(245)	LVTDLTKVHK(7)-LSQKFPK(4)	53	1	0	0	0	7	0	0	0	12	13	8	12	√	19.3523
myosin_heavy(1569)-myosin_heavy(1575)	AQLEFNQIKAEMER(9)-KLAEKDEEMEQAK(1)	52	1	0	0	0	0	0	0	0	13	14	12	12	√	n.a.
GST(113)-GST(11)	IAYSKDFETLK(5)-IKGLVQPTR(2)	51	0	0	0	0	6	0	0	0	11	10	12	12	√	20.653
Ab_C_region(440)-Ab_C_region(434)	WEKTDSFSCNVR(3)-LNMKTSK(4)	51	9	4	0	0	9	4	0	0	7	7	6	5	√	n.a.
GST(218)-GST(113)	YIAWPLQGWQATFGGGDHPPKSDLVPR(21)-IAYSKDFETLK(5)	51	0	0	0	0	0	0	0	0	14	11	12	14	√	16.4617
myosin_heavy(1240)-myosin_heavy(1247)	LELDDVTSNMEQIIKAK(15)-ANLEKMCR(5)	50	0	0	0	0	0	0	0	0	13	12	11	14	√	n.a.
myosin_heavy(1831)-myosin_heavy(1838)	ELENELEAEQKR(11)-NAESVKGMR(6)	47	0	2	0	0	3	0	0	0	12	9	11	10	√	n.a.
lysozyme(134)-lysozyme(31)	CKGTDVQAWIR(2)-CELAAAMKR(8)	45	5	0	0	0	0	0	0	0	9	13	9	9	√	20.0172
lactoferrin(200)-lactoferrin(183)	LCAGTGENKCAFSSQEPYFSYSGAFK(9)-FFSASCVPGADKGQFPNLCR(12)	44	11	12	5	0	0	0	0	0	4	4	4	4	√	8.84785
Aldolase(98)-Aldolase(139)	ADDGRPFPQVIKSK(12)-KDGADFAK(1)	44	15	13	10	0	0	0	0	0	2	2	2	0	√	13.8825
myosin_heavy(918)-myosin_heavy(920)	IQLEAKVK(6)-VKEMTER(2)	44	0	0	0	0	5	0	0	0	10	9	10	10	√	n.a.
GST(113)-GST(113)	IAYSKDFETLK(5)-IAYSKDFETLK(5)	44	0	0	0	0	7	0	0	0	8	8	10	11	√	0
Aldolase(311)-Aldolase(317)	ALQASALKAWGGK(8)-KENLK(1)	44	0	0	0	0	4	0	0	0	10	10	10	10	√	12.5584
myosin_heavy(1838)-myosin_heavy(1842)	NAESVKGMR(6)-KSER(1)	43	6	0	0	0	5	2	0	0	8	8	6	8	√	n.a.
GST(125)-GST(113)	VDFLSKLPEMLK(6)-IAYSKDFETLK(5)	43	0	0	0	0	3	0	0	0	10	10	10	10	√	20.3944
myosin_heavy(1569)-myosin_heavy(1859)	AQLEFNQIKAEMER(9)-KNLLR(1)	41	0	0	0	0	4	0	0	0	9	9	9	10	√	n.a.
myosin_heavy(1848)-myosin_heavy(1842)	IKELTYQTEEDRK(2)-KSER(1)	41	0	0	0	0	2	0	0	0	10	11	8	10	√	n.a.
F15E11.14(141)-F15E11.14(130)	EVQFVSKSGTSTTDFYR(7)-VEDHAQTTVIKVLEK(11), EVQFVSKSGTSTTDFYRHDV(7)-VEDHAQTTVIKVLEK(11)	40	21	19	0	0	0	0	0	0	0	0	0	0	√	14.2932
myosin_heavy(1240)-myosin_heavy(1242)	LELDDVTSNMEQIIKAK(15)-AKANLEK(2)	40	0	0	0	0	0	0	0	0	10	9	12	9	√	n.a.
myosin_heavy(1363)-myosin_heavy(1859)	VLSKANSEVAQWR(4)-KNLLR(1)	40	0	0	0	0	1	0	0	0	10	10	10	9	√	n.a.
myosin_heavy(1895)-myosin_heavy(1898)	QAEEAEEQANTNLSKFR(15)-KVQHELDEAEER(1)	39	14	7	0	0	3	0	0	0	1	4	4	6	√	n.a.
F15E11.13(113)-F15E11.14(115)	SWKQHMLTAEDDGK(3)-KHTLR(1)	39	0	0	0	0	0	0	0	0	8	9	10	12	√	25.7387
myosin_heavy(1528)-myosin_heavy(1814)	TIHELEKVR(7)-QLQKLEAR(4)	38	0	0	0	0	0	0	0	0	9	9	8	12	√	n.a.
bsa(204)-bsa(455)	GACLLPKIETMR(7)-SLGKVGTR(4)	37	0	0	0	0	1	0	0	0	9	8	8	11	√	19.5198
myosin_heavy(397)-myosin_heavy(367)	EEQAEPDGTEEADKSAYLMGLNSADLLKGLCHPR(28)-LKQR(2)	36	7	0	0	0	2	0	0	0	6	5	7	9	√	n.a.
Ab_C_region(454)-Ab_C_region(361)	HEGLKNYYLK(5)-IKGLVR(2)	36	0	0	0	0	3	0	0	0	8	10	7	8	√	n.a.
F15E11.13(124)-F15E11.13(16)	QHMLTAEDDGKTTTIR(11)-RTAKVSIDNQTGSHFK(4), QHMLTAEDDGKTTTIR(11)-TAKVSIDNQTGSHFK(3)	35	26	9	0	0	0	0	0	0	0	0	0	0	√	5.67947
myosin_heavy(1870)-myosin_heavy(1575)	LQDLVDKLQLK(7)-KLAEKDEEMEQAK(1), LQDLVDKLQLK(7)-KLAEK(1)	34	0	0	0	0	0	0	0	0	0	12	10	12	√	n.a.
Aldolase(1)-Aldolase(139)	PHSHPALTPEQK(1)-KDGADFAK(1)	33	0	0	0	0	8	0	0	0	7	5	9	4	√	34.6305
bsa(36)-bsa(28)	FKDLGEEHFK(2)-DTHKSEIAHR(4), FKDLGEEHFK(2)-RDTHKSEIAHR(5)	33	18	0	0	0	0	0	0	0	5	2	4	4	√	12.6118
myosin_heavy(1459)-myosin_heavy(1457)	QKYEESQSELESSQK(2)-ILAEWKQK(6)	33	4	3	0	0	4	0	0	0	6	6	4	6	√	n.a.
Ab_C_region(38)-Ab_C_region(361)	KPGETVKISCK(7)-IKGLVR(2)	33	0	0	0	0	5	0	0	0	8	6	7	7	√	n.a.
F15E11.14(88)-F15E11.13(96)	QIETNLDDKNGVVDGK(9)-GHQIGKK(6)	32	0	0	0	0	7	0	0	0	6	7	6	6	√	n.a.
myosin_heavy(1575)-myosin_heavy(1874)	KLAEKDEEMEQAK(1)-LQLKVK(4)	31	2	0	0	0	0	0	0	0	15	14	0	0	√	n.a.
Aldolase(110)-Aldolase(110)	VDKGVVPLAGTNGETTTQGLDGLSER(3)-VDKGVVPLAGTNGETTTQGLDGLSER(3)	30	2	1	0	0	0	3	0	0	6	6	6	6	√	0
myosin_heavy(1874)-myosin_heavy(1575)	LQLKVK(4)-KLAEKDEEMEQAK(1), LQLKVK(4)-KLAEK(1)	30	0	0	0	0	0	0	0	0	0	0	14	16	√	n.a.
GST(27)-GST(1)	LLLEYLEEKYEEHLYER(9)-MSPILGYWK(1)	29	12	0	0	0	4	0	0	0	3	2	3	5	√	n.a.
bsa(437)-bsa(561)	KVPQVSTPTLVEVSR(1)-HKPKATEEQLK(4)	28	12	9	0	0	0	0	0	0	3	2	0	2	√	11.7196
myosin_heavy(35)-myosin_heavy(50)	KDVYVPDDKEEFVK(1)-AKILSR(2)	27	0	0	0	0	0	0	0	0	8	6	7	6	√	n.a.
myosin_heavy(1806)-myosin_heavy(1810)	LDEAEQIALKGGK(10)-KQLQK(1)	26	0	0	0	0	2	0	0	0	6	7	5	6	√	n.a.
myosin_heavy(1390)-myosin_heavy(1391)	TEELEEAKK(8)-KKLAQR(1)	25	0	0	0	0	3	0	0	0	6	4	5	7	√	n.a.
lactoferrin(353)-F15E11.14(115)	KSEEEVAAR(1)-KHTLR(1)	25	0	0	0	0	0	0	0	0	5	7	6	7		n.a.
Ab_light(203)-Ab_light(151)	HNSYTCEATHKTSTSPIVK(11)-DINVKWK(5)	24	15	7	0	0	0	0	0	0	1	0	1	0	√	15.1484
Ab_C_region(338)-Aldolase(139)	VVSTLPIQHQDWMSGKEFK(16)-KDGADFAK(1)	24	0	0	0	0	0	0	0	0	10	7	3	4		n.a.
Ab_C_region(454)-Ab_C_region(32)	HEGLKNYYLK(5)-KPGETVK(1)	23	0	0	0	0	0	0	0	0	6	5	6	6	√	n.a.
Ab_light(107)-Ab_C_region(62)	INSLQPEDFGTYYCQHHYVTPPTFGGGTKLEIK(29)-QAPGKGLK(5)	23	0	0	0	0	5	0	0	0	3	4	6	5	√	n.a.
lysozyme(51)-lysozyme(134)	GYSLGNWVCAAKFESNFNTQATNR(12)-CKGTDVQAWIR(2)	21	5	4	0	0	0	0	0	0	0	4	4	4	√	13.5078
RNase-A(31)-RNase-A(37)	QHMDSSTSAASSSNYCNQMMKSR(21)-NLTKDR(4)	21	2	0	0	0	6	5	0	0	3	2	1	2	√	7.55889
myosin_heavy(871)-myosin_heavy(860)	RKELEEK(2)-LKEALEK(2)	21	1	0	0	0	1	0	0	0	6	3	0	10	√	n.a.
F15E11.14(46)-F15E11.13(97)	WVKLEPNQSAQILEK(3)-KSYIEHAK(1)	20	0	0	0	0	0	0	0	0	6	4	4	6	√	17.6514
Ab_C_region(434)-Ab_C_region(62)	LNMKTSK(4)-QAPGKGLK(5)	20	0	0	0	0	0	0	0	0	6	5	4	5	√	n.a.
Aldolase(152)-Aldolase(1)	CVLKIGEHTPSALAIMENANVLAR(4)-PHSHPALTPEQK(1)	19	0	0	0	0	0	0	0	0	7	4	4	4	√	10.5372
bsa(374)-bsa(228)	LAKEYEATLEECCAK(3)-CASIQKFGER(6)	19	3	2	0	0	5	0	0	0	0	2	4	3	√	16.8518
myosin_heavy(257)-myosin_heavy(207)	IHFGATGKLASADIETYLLEK(8)-KEQTPGK(1)	19	0	0	0	0	0	0	0	0	3	5	7	4	√	n.a.
Ab_light(78)-Ab_light(56)	FSGSGSGTQFSLKINSLQPEDFGTYYCQHHYVTPPTFGGGTK(13)-SPQLLVYNAKTLPEGVPSR(10)	18	11	7	0	0	0	0	0	0	0	0	0	0	√	n.a.
Ab_C_region(338)-Ab_C_region(38)	VVSTLPIQHQDWMSGKEFK(16)-KPGETVKISCK(7)	18	0	0	0	0	0	0	0	0	6	1	4	7	√	n.a.
myosin_heavy(207)-myosin_heavy(189)	KEQTPGK(1)-TVNTKR(5)	18	0	0	0	0	0	0	0	0	3	3	5	7	√	n.a.
Ab_light(203)-Ab_light(111)	HNSYTCEATHKTSTSPIVK(11)-LEIKR(4)	18	7	4	0	0	0	0	0	0	3	1	2	1	√	n.a.
bsa(138)-bsa(455)	DDSPDLPKLKPDPNTLCDEFK(8)-SLGKVGTR(4)	18	0	0	0	0	8	0	0	0	2	4	2	2	√	19.2046
myosin_heavy(968)-myosin_heavy(974)	EKHATENK(2)-HATENKVK(6)	17	0	0	0	0	0	0	0	0	4	5	3	5	√	n.a.
bsa(183)-bsa(204)	HPYFYAPELLYYANKYNGVFQECCQAEDK(15)-GACLLPKIETMR(7)	16	0	0	0	0	0	0	0	0	6	7	0	3	√	9.96143
myosin_heavy(1641)-myosin_heavy(1930)	MAAEAQKQVK(7)-DIGTKGLNEE(5)	16	4	0	0	0	0	0	0	0	3	3	3	3	√	n.a.
Ab_C_region(454)-Ab_C_region(62)	HEGLKNYYLK(5)-QAPGKGLK(5)	16	0	0	0	0	0	0	0	0	3	5	4	4	√	n.a.
myosin_heavy(1416)-myosin_heavy(1418)	CSSLEKTK(6)-TKHR(2)	16	0	0	0	0	0	0	0	0	4	4	4	4	√	n.a.
bsa(498)-bsa(228)	VTKCCTESLVNR(3)-CASIQKFGER(6)	15	10	5	0	0	0	0	0	0	0	0	0	0	√	13.1082
lactoferrin(263)-lactoferrin(257)	FKDCHLAR(2)-KPVDK(1)	15	0	0	0	0	0	0	0	0	3	4	4	4	√	10.7198
bsa(318)-bsa(245)	SHCIAEVEKDAIPENLPPLTADFAEDKDVCK(9)-LSQKFPK(4)	15	0	0	0	0	3	0	0	0	3	1	3	5	√	4.24552
GST(125)-GST(40)	VDFLSKLPEMLK(6)-DEGDKWR(5)	15	0	0	0	0	0	0	0	0	2	4	4	5	√	20.1649
Ab_C_region(38)-F15E11.14(115)	KPGETVKISCK(7)-KHTLR(1)	14	0	0	0	0	0	0	0	0	0	7	4	3		n.a.
bsa(266)-bsa(228)	VHKECCHGDLLECADDR(3)-CASIQKFGER(6)	14	0	0	0	0	0	0	0	0	3	3	3	5	√	12.5547
myosin_heavy(1528)-myosin_heavy(1531)	TIHELEKVR(7)-KQLEAEK(1)	14	0	0	0	0	2	0	0	0	5	3	1	3	√	n.a.
lactoferrin(681)-lactoferrin(261)	TTYEKYLGPQYVAGITNLK(5)-KPVDKFK(5)	14	0	0	0	0	0	0	0	0	4	2	3	5	√	16.6991
Aldolase(139)-Ab_C_region(361)	KDGADFAK(1)-IKGLVR(2)	14	0	0	0	0	0	0	0	0	3	5	2	4		n.a.
myosin_heavy(1557)-myosin_heavy(1842)	LELQSALEEAEASLEHEEGKILR(20)-KSER(1), QLEAEKLELQSALEEAEASLEHEEGKILR(26)-KSER(1)	14	0	0	0	0	0	0	0	0	3	5	2	4	√	n.a.
GST(78)-GST(1)	YIADKHNMLGGCPK(5)-MSPILGYWK(1)	13	8	5	0	0	0	0	0	0	0	0	0	0	√	n.a.
lysozyme(134)-lysozyme(134)	CKGTDVQAWIR(2)-CKGTDVQAWIR(2)	13	4	0	0	0	0	0	0	0	1	3	3	2	√	0
myosin_heavy(1569)-myosin_heavy(1579)	AQLEFNQIKAEMERK(9)-LAEKDEEMEQAKR(4), AQLEFNQIKAEMER(9)-KLAEKDEEMEQAK(5)	13	12	1	0	0	0	0	0	0	0	0	0	0	√	n.a.
Ab_C_region(62)-Ab_C_region(32)	QAPGKGLK(5)-KPGETVK(1)	13	0	0	0	0	0	0	0	0	4	3	3	3	√	n.a.
GST(45)-GST(11)	KFELGLEFPNLPYYIDGDVK(1)-IKGLVQPTR(2)	13	0	0	0	0	0	0	0	0	0	4	5	4	√	20.0367
Aldolase(98)-Aldolase(41)	ADDGRPFPQVIKSK(12)-GILAADESTGSIAKR(14)	13	0	0	0	0	0	0	0	0	2	5	2	4	√	28.6229
myosin_light(62)-myosin_heavy(825)	VNVKNEEIDEMIK(4)-AFMSVKNWPWMK(6)	12	0	0	0	0	0	0	0	0	2	3	3	4	√	n.a.
lysozyme(115)-lysozyme(134)	KIVSDGNGMNAWVAWR(1)-CKGTDVQAWIR(2)	12	2	0	0	0	0	0	0	0	0	5	2	3	√	19.5082
myosin_heavy(257)-myosin_heavy(450)	IHFGATGKLASADIETYLLEK(8)-INTTLETKQPR(8)	12	12	0	0	0	0	0	0	0	0	0	0	0	√	n.a.
myosin_heavy(912)-myosin_heavy(920)	NKIQLEAK(2)-VKEMTER(2)	12	0	0	0	0	0	0	0	0	3	3	3	3	√	n.a.
Ab_C_region(38)-Ab_C_region(343)	KPGETVKISCK(7)-CKVNNK(2)	12	0	0	0	0	0	0	0	0	4	3	2	3	√	n.a.
GST(218)-GST(11)	YIAWPLQGWQATFGGGDHPPKSDLVPR(21)-IKGLVQPTR(2)	12	0	0	0	0	0	0	0	0	4	4	4	0	√	15.8524
Ab_C_region(38)-Ab_C_region(434)	KPGETVKISCK(7)-LNMKTSK(4)	12	0	0	0	0	0	0	0	0	4	2	3	3	√	n.a.
bsa(420)-bsa(568)	QNCDQFEKLGEYGFQNALIVR(8)-ATEEQLKTVMENFVAFVDK(7)	11	0	0	0	0	4	0	0	0	0	3	4	0	√	14.5098
GST(45)-GST(125)	KFELGLEFPNLPYYIDGDVK(1)-VDFLSKLPEMLK(6)	11	3	0	0	0	5	0	0	0	0	0	0	3	√	15.7697
GST(218)-GST(194)	YIAWPLQGWQATFGGGDHPPKSDLVPR(21)-YLKSSK(3)	11	0	0	0	0	0	0	0	0	4	2	1	4	√	20.5629
myosin_heavy(976)-myosin_heavy(974)	VKNLTEEMAGLDEIIAK(2)-HATENKVK(6)	11	0	0	0	0	0	0	0	0	1	3	2	5	√	n.a.
Ab_light(203)-Ab_C_region(434)	HNSYTCEATHKTSTSPIVK(11)-LNMKTSK(4)	11	0	0	0	0	1	0	0	0	2	3	2	3	√	n.a.
Ab_C_region(434)-Ab_C_region(32)	LNMKTSK(4)-KPGETVK(1)	11	0	0	0	0	0	0	0	0	3	2	3	3	√	n.a.
lactoferrin(93)-lactoferrin(353)	ADAVTLDGGFIYEAGLAPYKLRPVAAEVYGTER(20)-KSEEEVAAR(1)	10	7	3	0	0	0	0	0	0	0	0	0	0	√	20.378
lactoferrin(183)-lactoferrin(353)	FFSASCVPGADKGQFPNLCR(12)-KSEEEVAAR(1)	10	0	0	0	0	0	0	0	0	2	1	5	2	√	26.0795
myosin_heavy(853)-myosin_heavy(860)	EMATMKEEFGR(6)-LKEALEK(2)	10	0	0	0	0	5	0	0	0	0	2	0	3	√	n.a.
Aldolase(311)-Aldolase(329)	ALQASALKAWGGK(8)-AAQEEYVKR(8)	10	0	0	0	0	0	0	0	0	3	3	2	2	√	13.8753
Aldolase(41)-Aldolase(317)	GILAADESTGSIAKR(14)-KENLK(1)	10	0	0	0	0	0	0	0	0	2	4	2	2	√	19.2965
lysozyme(51)-lysozyme(31)	GYSLGNWVCAAKFESNFNTQATNR(12)-CELAAAMKR(8)	10	0	0	0	0	0	0	0	0	0	4	3	3	√	15.6493
Ab_C_region(38)-Ab_C_region(62)	KPGETVKISCK(7)-QAPGKGLK(5)	10	0	0	0	0	0	0	0	0	2	5	1	2	√	n.a.
myosin_heavy(1575)-myosin_heavy(1870)	KLAEKDEEMEQAK(1)-LQDLVDKLQLK(7), KLAEK(1)-LQDLVDKLQLK(7)	10	0	0	0	0	0	0	0	0	10	0	0	0	√	n.a.
myosin_heavy(1410)-myosin_heavy(1418)	LQDAEEAVEAVNAKCSSLEK(14)-TKHR(2)	10	9	0	0	0	0	0	0	0	0	1	0	0	√	n.a.
bsa(374)-bsa(401)	LAKEYEATLEECCAK(3)-LKHLVDEPQNLIK(2)	9	0	0	0	0	4	0	0	0	3	0	2	0	√	13.6984
bsa(28)-bsa(36)	RDTHKSEIAHR(5)-FKDLGEEHFK(2)	9	0	7	2	0	0	0	0	0	0	0	0	0	√	12.6118
bsa(266)-bsa(245)	VHKECCHGDLLECADDR(3)-LSQKFPK(4)	9	0	0	0	0	0	0	0	0	4	1	2	2	√	21.4355
myosin_heavy(1641)-myosin_heavy(1842)	MAAEAQKQVK(7)-KSER(1)	9	0	0	0	0	0	0	0	0	1	4	1	3	√	n.a.
lysozyme(115)-lysozyme(31)	KIVSDGNGMNAWVAWR(1)-CELAAAMKR(8)	8	2	0	0	0	0	0	0	0	0	1	1	4	√	16.9857
lactoferrin(477)-lactoferrin(601)	KSCHTAVDR(1)-KPVTEAR(1)	8	0	0	0	0	0	0	0	0	0	3	3	2	√	19.9152
myosin_heavy(1575)-myosin_heavy(1876)	KLAEKDEEMEQAK(1)-VKAYK(2)	8	0	0	0	0	0	0	0	0	2	1	3	2	√	n.a.
myosin_heavy(1754)-myosin_heavy(1842)	NAEEKAK(5)-KSER(1)	8	0	0	0	0	0	0	0	0	3	1	1	3	√	n.a.
Ab_C_region(32)-Ab_C_region(361)	KPGETVK(1)-IKGLVR(2)	8	0	0	0	0	0	0	0	0	4	1	3	0	√	n.a.
myosin_heavy(1374)-myosin_heavy(1859)	TKYETDAIQR(2)-KNLLR(1)	8	0	0	0	0	0	0	0	0	2	2	2	2	√	n.a.
Ab_light(151)-Ab_C_region(434)	DINVKWK(5)-LNMKTSK(4)	8	0	0	0	0	0	0	0	0	2	2	2	2	√	n.a.
myosin_heavy(966)-myosin_heavy(974)	VEKEK(3)-HATENKVK(6), VEKEKHATENK(3)-HATENKVK(6)	8	0	0	0	0	0	0	0	0	0	5	0	3	√	n.a.
F15E11.13(97)-F15E11.13(97)	KSYIEHAK(1)-KSYIEHAK(1)	8	0	0	0	0	0	0	0	0	5	0	1	2	√	0
GST(78)-GST(2)	YIADKHNMLGGCPK(5)-SPILGYWK(1)	7	6	0	0	0	0	0	0	0	0	1	0	0	√	14.2469
myosin_heavy(1874)-myosin_heavy(1879)	LQDLVDKLQLKVK(11)-AYKR(3)	7	6	0	0	0	0	0	0	0	1	0	0	0	√	n.a.
Aldolase(139)-F15E11.14(115)	KDGADFAK(1)-KHTLR(1)	7	0	0	0	0	0	0	0	0	4	1	1	1		n.a.
myosin_heavy(1919)-myosin_heavy(1930)	ADIAESQVNKLR(10)-DIGTKGLNEE(5)	7	1	0	0	0	0	0	0	0	4	0	0	2	√	n.a.
RNase-A(37)-Ab_C_region(361)	NLTKDR(4)-IKGLVR(2)	7	0	0	0	0	0	0	0	0	2	1	2	2		n.a.
RNase-A(41)-RNase-A(37)	CKPVNTFVHESLADVQAVCSQK(2)-NLTKDR(4)	7	0	0	0	0	5	0	0	0	1	1	0	0	√	9.09196
bsa(346)-bsa(374)	NYQEAKDAFLGSFLYEYSR(6)-LAKEYEATLEECCAK(3)	6	0	0	0	0	0	0	0	0	0	3	0	3	√	12.3825
bsa(544)-bsa(548)	LFTFHADICTLPDTEKQIK(16)-KQTALVELLK(1)	6	6	0	0	0	0	0	0	0	0	0	0	0	√	6.47333
Ab_C_region(434)-F15E11.13(96)	LNMKTSK(4)-GHQIGKK(6)	6	0	0	0	0	0	0	0	0	2	0	2	2		n.a.
myosin_heavy(1262)-myosin_heavy(1754)	SKAEETQR(2)-NAEEKAK(5)	6	0	0	0	0	0	0	0	0	3	0	0	3	√	n.a.
myosin_heavy(860)-myosin_heavy(871)	LKEALEK(2)-RKELEEK(2), LKEALEK(2)-KELEEK(1)	6	0	0	0	0	0	0	0	0	0	0	6	0	√	n.a.
Aldolase(86)-Aldolase(139)	VNPCIGGVILFHETLYQKADDGRPFPQVIK(18)-KDGADFAK(1)	5	5	0	0	0	0	0	0	0	0	0	0	0	√	16.5366
GST(218)-GST(125)	YIAWPLQGWQATFGGGDHPPKSDLVPR(21)-VDFLSKLPEMLK(6)	5	0	0	0	0	0	0	0	0	2	1	0	2	√	23.9351
lysozyme(31)-lysozyme(31)	CELAAAMKR(8)-CELAAAMKR(8)	5	1	0	0	0	0	0	0	0	0	3	0	1	√	0
bsa(228)-bsa(235)	CASIQKFGER(6)-ALKAWSVAR(3)	5	0	0	0	0	0	0	0	0	1	3	0	1	√	13.7198
Ab_light(151)-Ab_C_region(361)	DINVKWK(5)-IKGLVR(2)	5	0	0	0	0	0	0	0	0	2	1	2	0	√	n.a.
Ab_C_region(454)-Ab_light(153)	HEGLKNYYLK(5)-WKIDGSER(2)	5	0	0	0	0	0	0	0	0	2	1	0	2	√	n.a.
bsa(228)-bsa(263)	CASIQKFGER(6)-LVTDLTKVHK(7)	5	0	0	0	0	3	0	0	0	0	1	1	0	√	16.3464
Aldolase(199)-myosin_heavy(189)	YASICQQNGIVPIVEPEILPDGDHDLKRCQYVTEK(27)-TVNTKR(5)	5	2	2	1	0	0	0	0	0	0	0	0	0		n.a.
Ab_light(146)-Ab_C_region(62)	RADAAPTVSIFPPSSEQLTSGGASVVCFLNNFYPKDINVK(35)-QAPGKGLK(5)	5	0	0	0	0	0	0	0	0	0	3	0	2	√	n.a.
myosin_heavy(974)-myosin_heavy(966)	HATENKVK(6)-VEKEK(3)	5	0	0	0	0	0	0	0	0	3	0	2	0	√	n.a.
myosin_heavy(1221)-myosin_heavy(1216)	EKSEFK(2)-QKLEK(2)	5	0	0	0	0	0	0	0	0	3	0	1	1	√	n.a.
F15E11.13(28)-F15E11.13(104)	VSIDNQTGSHFKFQVTHK(12)-SYIEHAKFISDSR(7)	4	0	0	0	0	4	0	0	0	0	0	0	0	√	9.3908
myosin_heavy(1870)-myosin_heavy(1374)	LQDLVDKLQLK(7)-TKYETDAIQR(2)	4	2	0	0	0	0	0	0	0	0	2	0	0	√	n.a.
lysozyme(134)-myosin_heavy(1528)	CKGTDVQAWIR(2)-TIHELEKVR(7)	4	4	0	0	0	0	0	0	0	0	0	0	0		n.a.
F15E11.13(124)-F15E11.13(2)	QHMLTAEDDGKTTTIR(11)-STDPTPPQLTR(1)	4	4	0	0	0	0	0	0	0	0	0	0	0	√	n.a.
bsa(318)-bsa(463)	SHCIAEVEKDAIPENLPPLTADFAEDKDVCK(9)-CCTKPESER(4)	4	4	0	0	0	0	0	0	0	0	0	0	0	√	17.7042
Aldolase(139)-Aldolase(100)	KDGADFAK(1)-SKGGVVGIK(2)	4	0	0	0	0	0	0	0	0	0	0	3	1	√	19.0745
Ab_C_region(454)-Ab_C_region(38)	HEGLKNYYLK(5)-KPGETVKISCK(7)	4	0	0	0	0	0	0	0	0	1	2	0	1	√	n.a.
GST(78)-GST(125)	YIADKHNMLGGCPK(5)-VDFLSKLPEMLK(6)	4	0	0	0	0	0	0	0	0	2	0	0	2	√	33.7662
Ab_C_region(38)-lactoferrin(353)	KPGETVKISCK(7)-KSEEEVAAR(1)	4	0	0	0	0	0	0	0	0	4	0	0	0		n.a.
myosin_heavy(1444)-myosin_heavy(1842)	SNAAAAALDKK(10)-KSER(1)	4	0	0	0	0	0	0	0	0	1	1	1	1	√	n.a.
myosin_heavy(1528)-myosin_heavy(1810)	TIHELEKVR(7)-KQLQKLEAR(1)	4	0	0	0	0	0	0	0	0	0	2	2	0	√	n.a.
Ab_C_region(338)-Ab_C_region(359)	VVSTLPIQHQDWMSGKEFK(16)-TISKIK(4)	4	0	2	0	0	0	0	0	0	0	1	0	1	√	n.a.
Ab_C_region(361)-Ab_light(111)	IKGLVR(2)-LEIKR(4)	4	3	0	0	0	0	0	0	0	1	0	0	0	√	n.a.
myosin_heavy(206)-myosin_heavy(189)	SKKEQTPGK(2)-TVNTKR(5)	4	0	0	0	0	0	0	0	0	0	1	1	2	√	n.a.
myosin_heavy(1082)-myosin_heavy(1374)	KKDFELNALNAR(1)-TKYETDAIQR(2)	3	3	0	0	0	0	0	0	0	0	0	0	0	√	n.a.
myosin_heavy(1700)-lysozyme(134)	KLAEQELIETSER(1)-CKGTDVQAWIR(2)	3	3	0	0	0	0	0	0	0	0	0	0	0		n.a.
Aldolase(199)-Aldolase(207)	YASICQQNGIVPIVEPEILPDGDHDLKR(27)-CQYVTEKVLAAVYK(7)	3	3	0	0	0	0	0	0	0	0	0	0	0	√	12.3753
Aldolase(1)-Aldolase(13)	PHSHPALTPEQK(1)-KELSDIAHR(1)	3	0	0	0	0	0	0	0	0	0	1	0	2	√	24.4624
Aldolase(41)-Aldolase(107)	GILAADESTGSIAKR(14)-GGVVGIKVDK(7)	3	3	0	0	0	0	0	0	0	0	0	0	0	√	18.853
myosin_heavy(1022)-myosin_heavy(1026)	ALQEAHQQALDDLQAEEDKVNTLTKAK(25)-VKLEQHVDDLEGSLEQEK(2)	3	0	0	0	0	0	0	0	0	0	0	0	3	√	n.a.
GST(27)-GST(40)	LLLEYLEEKYEEHLYER(9)-DEGDKWR(5)	3	3	0	0	0	0	0	0	0	0	0	0	0	√	24.5676
lactoferrin(630)-lactoferrin(625)	LKQVLLHQQAK(2)-MDKVER(3)	3	0	0	0	0	0	0	0	0	0	0	3	0	√	8.55549
Ab_light(203)-myosin_heavy(803)	HNSYTCEATHKTSTSPIVK(11)-KLLER(1)	3	2	1	0	0	0	0	0	0	0	0	0	0		n.a.
lactoferrin(321)-GST(1)	DLLFKDSAIGFSR(5)-MSPILGYWK(1)	3	0	0	0	0	0	0	0	0	0	2	0	1		n.a.
F15E11.13(96)-RNase-A(7)	GHQIGKKSYIEHAK(6)-ETAAAKFER(6)	3	0	0	0	0	0	0	0	0	0	0	1	2		n.a.
Ab_C_region(62)-Ab_C_region(361)	QAPGKGLK(5)-IKGLVR(2)	3	0	0	0	0	0	0	0	0	2	1	0	0	√	n.a.
myosin_heavy(679)-myosin_heavy(189)	CIIPNETKSPGVIDNPLVMHQLR(8)-TVNTKR(5)	3	3	0	0	0	0	0	0	0	0	0	0	0	√	n.a.
myosin_heavy(1757)-myosin_heavy(1754)	KAITDAAMMAEELKK(1)-NAEEKAK(5)	3	2	0	0	0	0	0	0	0	0	0	0	1	√	n.a.
Aldolase(199)-myosin_heavy(994)	YASICQQNGIVPIVEPEILPDGDHDLKRCQYVTEK(27)-LTKEK(3)	3	0	0	0	0	0	0	0	0	1	2	0	0		n.a.
myosin_heavy(1242)-myosin_heavy(1842)	AKANLEK(2)-KSER(1)	3	0	0	0	0	0	0	0	0	2	0	1	0	√	n.a.
myosin_heavy(1874)-myosin_heavy(1876)	LQLKVK(4)-VKAYK(2)	3	0	0	0	0	0	0	0	0	1	1	1	0	√	n.a.
myosin_heavy(825)-myosin_light(165)	AFMSVKNWPWMK(6)-NLVHIITHGEEKD(12)	3	0	0	0	0	0	0	0	0	0	3	0	0	√	n.a.
bsa(140)-lysozyme(134)	LKPDPNTLCDEFK(2)-CKGTDVQAWIR(2)	3	0	0	0	0	0	0	0	0	0	2	0	1		n.a.
myosin_heavy(1919)-myosin_heavy(1923)	ADIAESQVNKLR(10)-AKSR(2)	3	1	0	0	0	0	0	0	0	1	1	0	0	√	n.a.
myosin_heavy(1459)-myosin_heavy(1451)	QKYEESQSELESSQK(2)-NFDKILAEWK(4)	2	2	0	0	0	0	0	0	0	0	0	0	0	√	n.a.
Aldolase(207)-Aldolase(1)	CQYVTEKVLAAVYK(7)-PHSHPALTPEQK(1)	2	2	0	0	0	0	0	0	0	0	0	0	0	√	7.81656
myosin_heavy(1557)-myosin_heavy(1848)	LELQSALEEAEASLEHEEGKILR(20)-IKELTYQTEEDRK(2)	2	0	0	0	0	0	0	0	0	0	0	0	2	√	n.a.
GST(218)-GST(191)	YIAWPLQGWQATFGGGDHPPKSDLVPR(21)-IEAIPQIDKYLK(9)	2	0	0	0	0	0	0	0	0	2	0	0	0	√	25.0394
myosin_heavy(1305)-myosin_heavy(1791)	GKLTYTQQLEDLKR(2)-NMEQTIKDLQHR(7)	2	0	0	0	0	0	0	0	0	0	2	0	0	√	n.a.
Ab_C_region(32)-F15E11.13(96)	KPGETVKISCK(1)-GHQIGKK(6)	2	0	0	0	0	0	0	0	0	2	0	0	0		n.a.
Ab_C_region(84)-Ab_C_region(454)	WMGWINTYTGEPTYADDFKGR(19)-HEGLKNYYLK(5)	2	0	0	0	0	0	0	0	0	0	0	2	0	√	n.a.
myosin_heavy(968)-myosin_heavy(1262)	EKHATENK(2)-SKAEETQR(2)	2	0	0	0	0	0	0	0	0	1	0	0	1	√	n.a.
myosin_heavy(1503)-myosin_heavy(1499)	ENKNLQEEISDLTEQLGSSGK(3)-NAYEESLEHLETFKR(14)	2	0	0	0	0	0	0	0	0	2	0	0	0	√	n.a.
Ab_C_region(434)-Ab_C_region(460)	LNMKTSK(4)-KTISR(1)	2	0	0	0	0	0	0	0	0	2	0	0	0	√	n.a.
myosin_heavy(1216)-myosin_heavy(1214)	VKQKLEK(4)-VKQK(2)	2	0	0	0	0	0	0	0	0	0	1	1	0	√	n.a.
RNase-A(37)-RNase-A(1)	NLTKDR(4)-KETAAAK(1)	2	0	0	0	0	0	0	0	0	2	0	0	0	√	16.5778
bsa(318)-bsa(304)	SHCIAEVEKDAIPENLPPLTADFAEDKDVCK(9)-LKECCDKPLLEK(7)	2	2	0	0	0	0	0	0	0	0	0	0	0	√	18.4265
myosin_heavy(1221)-myosin_heavy(1214)	LEKEKSEFK(5)-VKQK(2)	2	0	0	0	0	0	0	0	0	1	1	0	0	√	n.a.
Ab_C_region(338)-Ab_C_region(62)	VVSTLPIQHQDWMSGKEFK(16)-QAPGKGLK(5)	2	0	0	0	0	0	0	0	0	1	1	0	0	√	n.a.
myosin_light(91)-lactoferrin(625)	LKGADPEETILNAFK(2)-MDKVER(3)	2	0	0	2	0	0	0	0	0	0	0	0	0		n.a.
bsa(235)-bsa(245)	ALKAWSVAR(3)-LSQKFPK(4)	2	0	0	0	0	0	0	0	0	0	0	2	0	√	15.1213
Aldolase(41)-myosin_heavy(1842)	GILAADESTGSIAKR(14)-KSER(1)	2	0	0	0	0	0	0	0	0	0	1	1	0		n.a.
Ab_C_region(434)-Ab_C_region(361)	LNMKTSK(4)-IKGLVR(2)	2	0	0	0	0	0	0	0	0	0	0	1	1	√	n.a.
F15E11.14(88)-Ab_C_region(454)	QIETNLDDKNGVVDGK(9)-HEGLKNYYLK(5)	2	0	0	0	0	0	0	0	0	0	2	0	0		n.a.
bsa(204)-bsa(463)	GACLLPKIETMR(7)-CCTKPESER(4)	2	0	0	0	0	0	0	0	0	1	0	1	0	√	22.1258
bsa(211)-bsa(245)	EKVLASSAR(2)-LSQKFPK(4)	2	0	0	0	0	0	0	0	0	0	1	1	0	√	n.a.
myosin_heavy(1838)-myosin_heavy(1923)	NAESVKGMR(6)-AKSR(2)	2	0	0	0	0	0	0	0	0	0	2	0	0	√	n.a.
myosin_heavy(1668)-myosin_heavy(1374)	ANDDLKENIAIVER(6)-TKYETDAIQR(2)	1	1	0	0	0	0	0	0	0	0	0	0	0	√	n.a.
F15E11.14(21)-F15E11.14(134)	VDIENKSDHVFK(6)-VLEKEVQFVSK(4)	1	1	0	0	0	0	0	0	0	0	0	0	0	√	10.403
bsa(437)-bsa(559)	KVPQVSTPTLVEVSR(1)-HKPKATEEQLK(2)	1	0	1	0	0	0	0	0	0	0	0	0	0	√	13.4887
myosin_heavy(910)-myosin_heavy(918)	CDQLIKNK(6)-IQLEAKVK(6)	1	1	0	0	0	0	0	0	0	0	0	0	0	√	n.a.
myosin_heavy(1848)-myosin_heavy(1363)	IKELTYQTEEDRK(2)-VLSKANSEVAQWR(4)	1	1	0	0	0	0	0	0	0	0	0	0	0	√	n.a.
lactoferrin(353)-lactoferrin(601)	KSEEEVAAR(1)-KPVTEAR(1)	1	0	0	0	0	0	0	0	0	1	0	0	0	√	60.6206
GST(181)-GST(194)	KRIEAIPQIDK(1)-YLKSSK(3)	1	1	0	0	0	0	0	0	0	0	0	0	0	√	14.2386
bsa(318)-bsa(340)	SHCIAEVEKDAIPENLPPLTADFAEDK(9)-DVCKNYQEAK(4)	1	1	0	0	0	0	0	0	0	0	0	0	0	√	33.7207
Ab_C_region(454)-Aldolase(139)	HEGLKNYYLK(5)-KDGADFAK(1)	1	0	0	0	0	0	0	0	0	0	0	1	0		n.a.
lactoferrin(681)-lactoferrin(257)	TTYEKYLGPQYVAGITNLK(5)-KPVDK(1)	1	0	0	0	0	0	0	0	0	0	0	1	0	√	17.7735
myosin_heavy(1569)-myosin_heavy(1569)	AQLEFNQIKAEMER(9)-AQLEFNQIKAEMER(9)	1	1	0	0	0	0	0	0	0	0	0	0	0	√	n.a.
Aldolase(199)-myosin_heavy(707)	YASICQQNGIVPIVEPEILPDGDHDLKRCQYVTEK(27)-KGFPNR(1)	1	0	1	0	0	0	0	0	0	0	0	0	0		n.a.
myosin_heavy(1390)-myosin_heavy(1879)	TEELEEAKKK(8)-AYKR(3)	1	1	0	0	0	0	0	0	0	0	0	0	0	√	n.a.
Aldolase(199)-myosin_heavy(1876)	YASICQQNGIVPIVEPEILPDGDHDLKRCQYVTEK(27)-VKAYKR(2)	1	1	0	0	0	0	0	0	0	0	0	0	0		n.a.
myosin_light(165)-myosin_heavy(835)	NLVHIITHGEEKD(12)-LYFKIKPLLK(4)	1	0	0	0	0	0	0	0	0	0	0	0	1	√	n.a.
lactoferrin(93)-myosin_heavy(1247)	ADAVTLDGGFIYEAGLAPYKLRPVAAEVYGTER(20)-ANLEKMCR(5)	1	1	0	0	0	0	0	0	0	0	0	0	0		n.a.
F15E11.14(15)-myosin_heavy(1354)	ASDEPSGVTEQWAKVDIENK(14)-EQYEEETEAKAELQR(10)	1	0	0	1	0	0	0	0	0	0	0	0	0		n.a.
Ab_C_region(245)-beta-galactosidase(622)	KLEPSGPISTINPCPPCKECHK(18)-TPHPALTEAKHQQQFFQFR(10)	1	1	0	0	0	0	0	0	0	0	0	0	0		n.a.
myosin_heavy(1483)-myosin_heavy(1784)	SLSTELFKLK(8)-KNMEQTIK(1)	1	0	0	0	0	0	0	0	0	1	0	0	0	√	n.a.
bsa(340)-F15E11.14(115)	DVCKNYQEAK(4)-KHTLR(1)	1	0	1	0	0	0	0	0	0	0	0	0	0		n.a.
myosin_heavy(1919)-myosin_heavy(1842)	ADIAESQVNKLR(10)-KSER(1)	1	1	0	0	0	0	0	0	0	0	0	0	0	√	n.a.
bsa(340)-Ab_C_region(38)	DVCKNYQEAKDAFLGSFLYEYSR(4)-KPGETVKISCK(7)	1	0	0	1	0	0	0	0	0	0	0	0	0		n.a.
myosin_heavy(434)-myosin_heavy(1757)	GQNVQQVMYATGALAKAVYEKMFNWMVTR(21)-KAITDAAMMAEELKK(1)	1	0	1	0	0	0	0	0	0	0	0	0	0	√	n.a.
bsa(28)-beta-galactosidase(477)	RDTHKSEIAHR(5)-WIKSVDPSR(3)	1	0	0	0	0	0	0	0	0	1	0	0	0		n.a.
Aldolase(139)-Ab_C_region(460)	KDGADFAK(1)-KTISR(1)	1	0	0	0	0	0	0	0	0	0	1	0	0		n.a.
lactoferrin(297)-RNase-A(37)	QAQEKFGK(5)-NLTKDR(4)	1	0	0	0	0	0	0	0	0	1	0	0	0		n.a.
Aldolase(199)-bsa(544)	YASICQQNGIVPIVEPEILPDGDHDLKR(27)-LFTFHADICTLPDTEKQIK(16)	1	0	0	0	0	0	1	0	0	0	0	0	0		n.a.
bsa(36)-bsa(455)	FKDLGEEHFK(2)-SLGKVGTR(4)	1	0	0	0	0	0	0	0	0	0	1	0	0	√	43.2318
lactoferrin(38)-myosin_heavy(18)	SVQWCAVSQPEATKCFQWQRNMR(14)-KSEK(1)	1	0	0	0	0	0	1	0	0	0	0	0	0		n.a.
F15E11.13(90)-lactoferrin(676)	TEVDNKGHQIGK(6)-LHGKTTYEK(4)	1	0	0	0	0	0	0	1	0	0	0	0	0		n.a.
Ab_C_region(454)-RNase-A(37)	HEGLKNYYLK(5)-NLTKDR(4)	1	0	0	0	0	0	0	0	0	0	0	1	0		n.a.
myosin_heavy(1485)-myosin_heavy(1483)	LKNAYEESLEHLETFK(2)-SLSTELFKLK(8)	1	0	0	0	0	0	0	0	0	1	0	0	0	√	n.a.
Ab_C_region(338)-myosin_heavy(1874)	VVSTLPIQHQDWMSGKEFK(16)-LQLKVK(4)	1	0	0	0	0	0	0	0	0	0	0	0	1		n.a.
bsa(455)-myosin_heavy(1418)	VPQVSTPTLVEVSRSLGKVGTR(18)-TKHR(2)	1	0	0	1	0	0	0	0	0	0	0	0	0		n.a.
myosin_heavy(570)-myosin_heavy(565)	NIKGRPEAHFALIHYAGTVDYNIIGWLQK(3)-SNNFQKPR(6)	1	1	0	0	0	0	0	0	0	0	0	0	0	√	n.a.
F15E11.13(96)-Ab_C_region(361)	GHQIGKK(6)-IKGLVR(2)	1	0	0	0	0	0	0	0	0	1	0	0	0		n.a.
myosin_heavy(1106)-myosin_heavy(1859)	IEDEQALGSQLQKK(13)-KNLLR(1)	1	0	0	0	0	0	0	0	1	0	0	0	0	√	n.a.
lactoferrin(283)-lactoferrin(58)	SVNGKEDAIWNLLR(5)-GPPVSCIKR(8)	1	1	0	0	0	0	0	0	0	0	0	0	0	√	19.2261
F15E11.14(95)-beta-galactosidase(392)	QIETNLDDKNGVVDGKVR(16)-EVCQLGEILSKLPEVR(11)	1	1	0	0	0	0	0	0	0	0	0	0	0		n.a.
myosin_light(111)-myosin_heavy(1457)	VFDPEGKGVLR(7)-ILAEWKQK(6)	1	0	1	0	0	0	0	0	0	0	0	0	0	√	n.a.
Ab_C_region(338)-Ab_light(111)	VVSTLPIQHQDWMSGKEFK(16)-LEIKR(4)	1	0	0	0	0	0	0	0	0	0	0	1	0	√	n.a.
myosin_heavy(1374)-myosin_heavy(1874)	TKYETDAIQR(2)-LQLKVK(4)	1	1	0	0	0	0	0	0	0	0	0	0	0	√	n.a.
myosin_heavy(1457)-myosin_heavy(1842)	ILAEWKQK(6)-KSER(1)	1	0	0	0	0	1	0	0	0	0	0	0	0	√	n.a.
bsa(463)-myosin_heavy(1166)	CCTKPESER(4)-KREAEFQK(1)	1	0	0	0	0	0	0	0	0	0	1	0	0		n.a.
myosin_heavy(1240)-F15E11.14(1)	LELDDVTSNMEQIIKAK(15)-MASDEPSGVTEQWAK(1)	1	1	0	0	0	0	0	0	0	0	0	0	0		n.a.
GST(218)-GST(40)	YIAWPLQGWQATFGGGDHPPKSDLVPR(21)-DEGDKWR(5)	1	0	0	0	0	0	0	0	0	0	0	0	1	√	28.3483
Ab_C_region(361)-F15E11.14(115)	IKGLVR(2)-KHTLR(1)	1	0	0	0	0	0	0	0	0	0	1	0	0		n.a.
F15E11.13(96)-myosin_heavy(1324)	GHQIGKKSYIEHAK(6)-QLEEEVKAK(7)	1	0	0	0	0	0	0	0	0	0	0	0	1		n.a.
RNase-A(98)-bsa(228)	YPNCAYKTTQANK(7)-LRCASIQKFGER(8)	1	0	0	0	0	1	0	0	0	0	0	0	0		n.a.
F15E11.14(115)-F15E11.14(115)	KHTLR(1)-KHTLR(1)	1	0	0	0	0	0	0	0	0	0	1	0	0	√	0
bsa(36)-bsa(155)	FKDLGEEHFK(2)-ADEKK(4)	1	0	0	0	0	0	0	0	0	1	0	0	0	√	20.4796
myosin_light(62)-myosin_light(165)	VNVKNEEIDEMIK(4)-NLVHIITHGEEKD(12)	1	0	0	0	0	0	0	0	0	0	1	0	0	√	n.a.
Aldolase(41)-Aldolase(146)	GILAADESTGSIAKR(14)-DGADFAKWR(7)	1	0	0	0	0	0	0	0	0	0	1	0	0	√	21.1156
lactoferrin(353)-myosin_heavy(207)	KSEEEVAAR(1)-KEQTPGK(1)	1	0	0	0	0	0	0	0	0	1	0	0	0		n.a.
Summary
	BS3					Leiker (w/o enrichment)				Leiker (w/ enrichment)				Leiker
10-prot std: E. coli lysate	1:0	1:1	1:10	1:100	all experiments	1:0	1:1	1:10	1:100	1:0	1:1	1:10	1:100	all experiments
total #spec	623	290	85	1	999	369	126	8	1	922	927	877	965	4195
nonspecific	16	5	6	0	27	1	2	1	0	37	40	24	29	134
nonspecific%	0.0256822	0.0172414	0.0705882	0	0.03	0.00271003	0.015873	0.125	0	0.0401302	0.0431499	0.027366	0.0300518	0.03
specific%	0.974318	0.982759	0.929412	1	0.97	1	0.984127	0.875	1	0.95987	0.95685	0.972634	0.969948	0.97
Filtering criteria: FDR < 5%, E-value < 0.01. (The FDR used in this paper all indicates spectral FDR.) Specific cross-links indicate all the intra-molecular cross-links and the inter-molecular cross-links between the light-chain and the heavy-chain of myosin, between the light-chain and the heavy-chain of an IgG antibody, and between PUD-1 and PUD-2.
