# Supplementary material for: Trifunctional cross-linker for mapping protein-protein interaction networks and comparing protein conformational states
Source: eLife journal article supplement (doi:10.7554/elife.12509), 2016-03-03
Supplement: supp [file elife-12509-supp-v1.zip › elife_poa_e12509_Figure_4_figure_supplement_1.pdf]

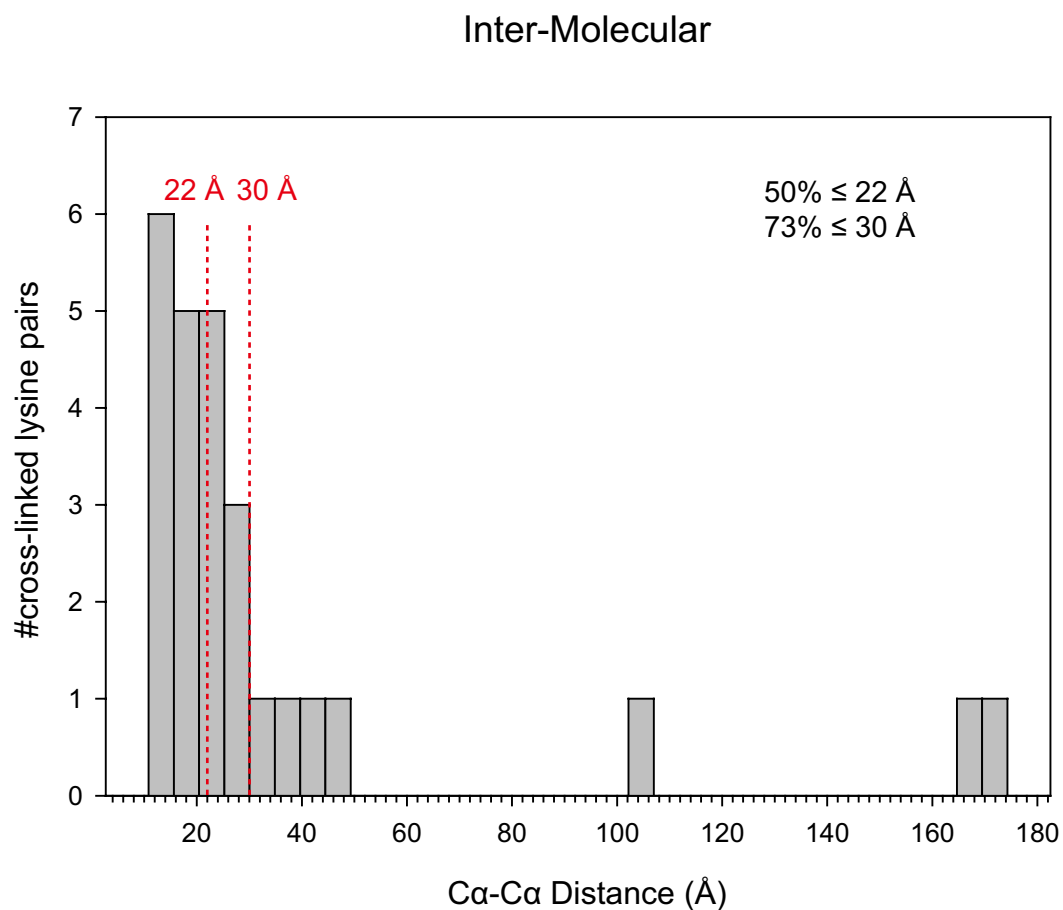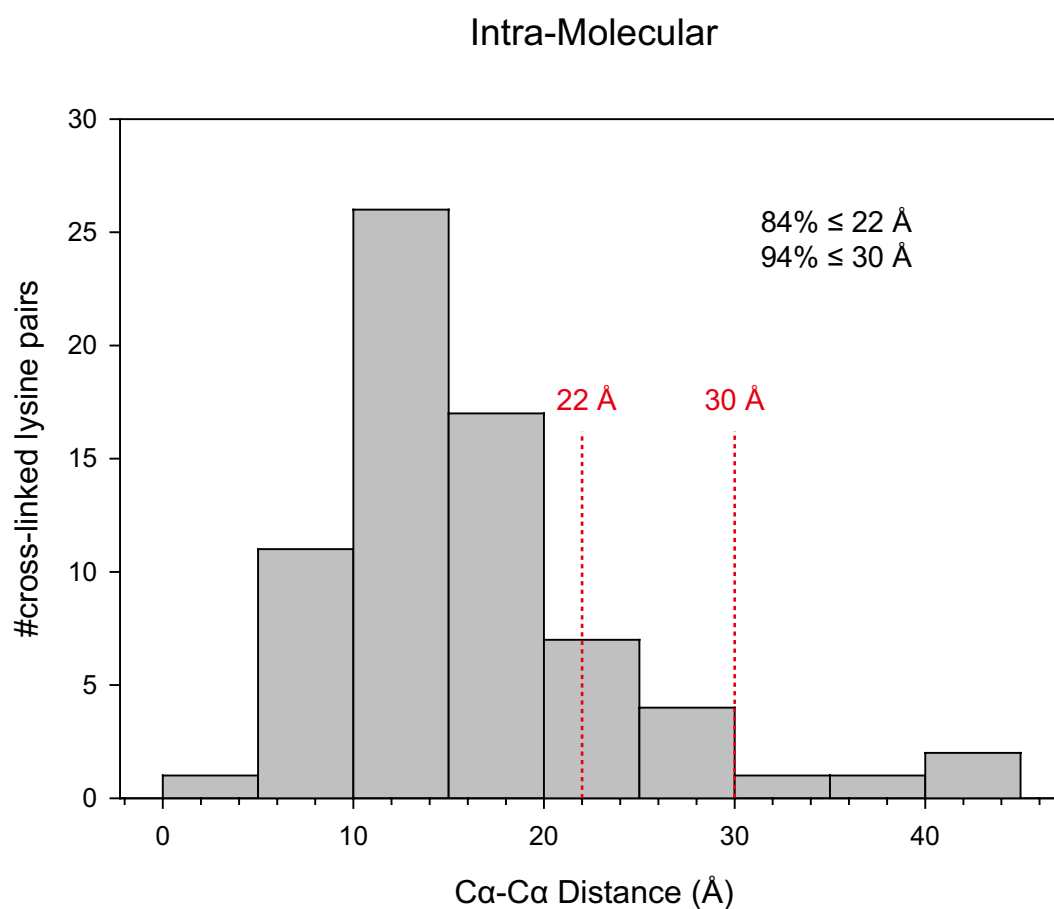

**Figure 4—figure supplement 1. Distance distribution of the inter-molecular and intra-molecular cross-links identified in 70S ribosomes. (PDB code: 5AFI)**
