# Supplementary material for: Trifunctional cross-linker for mapping protein-protein interaction networks and comparing protein conformational states
Source: eLife journal article supplement (doi:10.7554/elife.12509), 2016-03-03
Supplement: supp [file elife-12509-supp-v1.zip › elife_poa_e12509_Figure_4_figure_supplement_2.pdf]

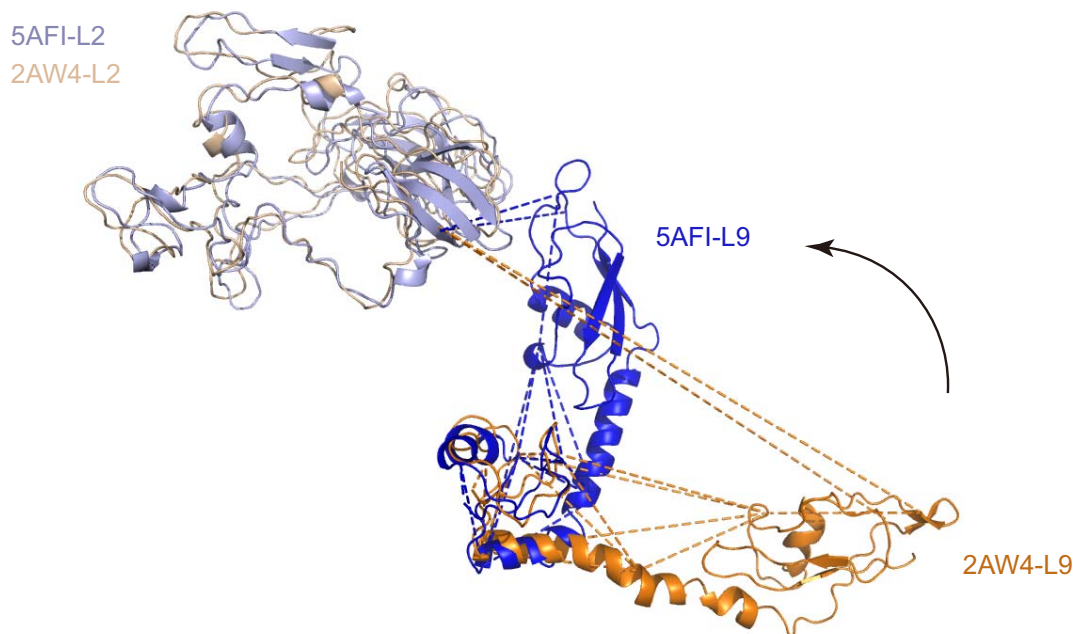

**Figure 4—figure supplement 2. Alignment of L9 and L2 from the crystal structure (L9, orange; L2, wheat; PDB code: 2AW4) and their counterparts from the cryo-EM reconstruction (L9, blue; L2, lightblue; PDB code: 5AFI).** The cross-links are mapped to both structures and shown as orange and blue dashed lines, respectively. Many of the cross-linked lysine residues are far in space according to the crystal structure, but much closer according to the cryo-EM structure.
