# Supplementary material for: Trifunctional cross-linker for mapping protein-protein interaction networks and comparing protein conformational states
Source: eLife journal article supplement (doi:10.7554/elife.12509), 2016-03-03
Supplement: supp [file elife-12509-supp-v1.zip › elife_poa_e12509_Figure_4_figure_supplement_4.pdf]

**A**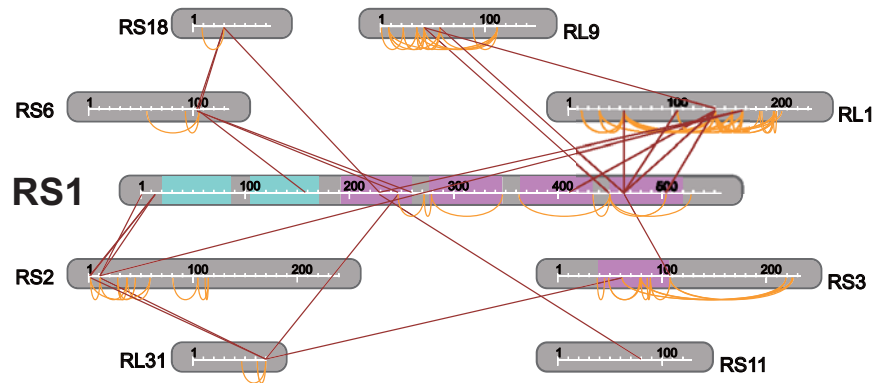**B**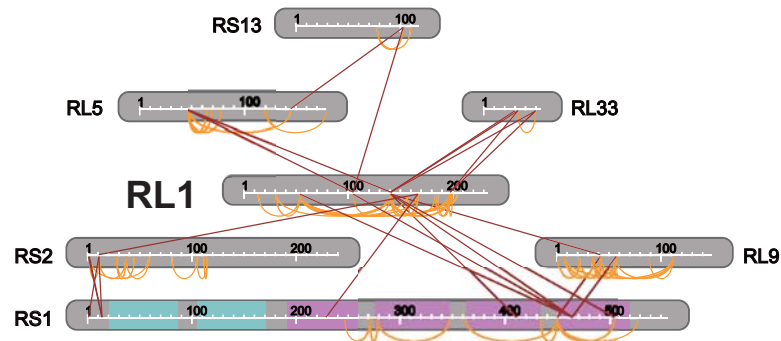**C**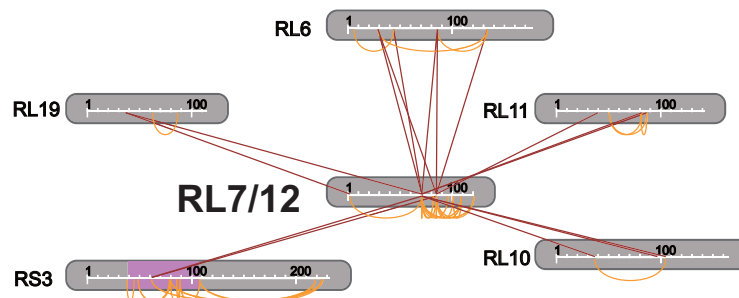**D**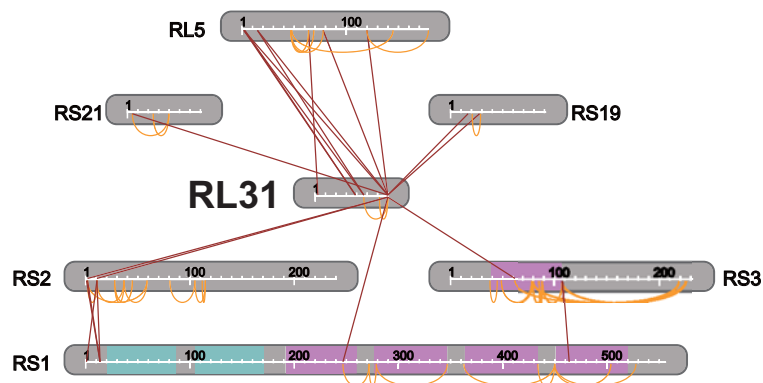

**Figure 4—figure supplement 4. Connectivity maps of cross-links involving (A) S1, (B) L1, (C) L7/12, and (D) L31.**

Inter-molecular cross-links are shown in red; intra-molecular cross-links in orange. The two ribosome-binding domains of S1 are colored cyan and all the other domains are colored magenta.
