# Supplementary material for: Trifunctional cross-linker for mapping protein-protein interaction networks and comparing protein conformational states
Source: eLife journal article supplement (doi:10.7554/elife.12509), 2016-03-03
Supplement: supp [file elife-12509-supp-v1.zip › elife_poa_e12509_Figure_4_figure_supplement_6.pdf]

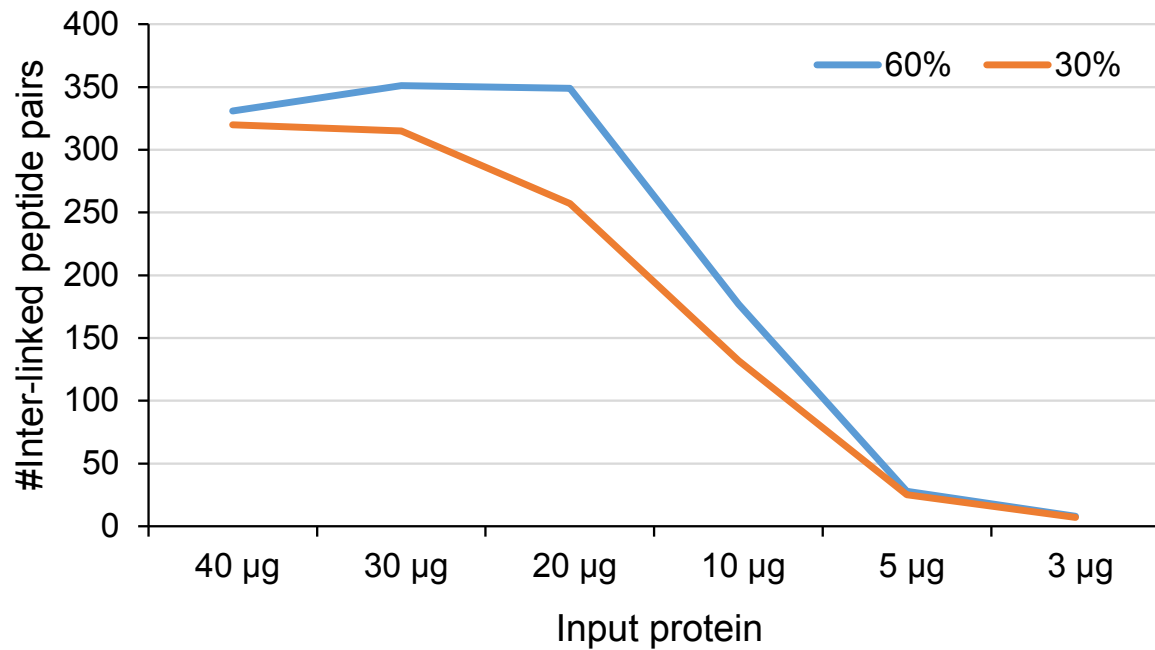

**Figure 4—figure supplement 6. Number of identified inter-linked peptide pairs from decreasing amount of Leiker-cross-linked exosome immunoprecipitate (FDR < 0.05, E-value < 0.01). After enrichment, 30% (orange) or 60% (blue) of each sample was analyzed by LC-MS/MS.**
