# Supplementary material for: Trifunctional cross-linker for mapping protein-protein interaction networks and comparing protein conformational states
Source: eLife journal article supplement (doi:10.7554/elife.12509), 2016-03-03
Supplement: supp [file elife-12509-supp-v1.zip › elife_poa_e12509_Figure_4_source_data_1.xlsx]

## Sheet: Sheet1
Figure 4—source data 1. CXMS analysis of E. coli 70S ribosomes
No.	Protein1-Protein2	Peptide1-Peptide2	#Spectra	Best E-value	Cα-Cα Distance (Å) (PDB code: 5AFI)
Inter-molecular Cross-links
1	RL9(57)-RL28(44)	AELEAKLAEVLAAANAR(6)-FWVESEKR(7), RAELEAKLAEVLAAANAR(7)-FWVESEKR(7)	323	7.34e-15	23.6727
2	RS1(464)-RL1(54)	VTAVDAKGATVELADGVEGYLR(7)-KSDQNVR(1)	157	3.23e-16	n.a.
3	RL7(85)-RL6(86)	EAKDLVESAPAALK(3)-KLQLVGVGYR(1)	143	1.22e-18	n.a.
4	RL9(42)-RL28(44)	KNIEFFEAR(1)-FWVESEKR(7)	130	1.94e-12	20.7108
5	RS1(14)-RS2(1)	TESFAQLFEESLKEIETRPGSIVR(13)-MATVSMR(1), TESFAQLFEESLKEIETR(13)-MATVSMR(1)	128	3.49e-10	n.a.
6	RL7(85)-RL6(29)	EAKDLVESAPAALK(3)-GKNGELTR(2)	117	2.68e-12	n.a.
7	RL31(39)-RL5(2)	STVGHDLNLDVCSKCHPFFTGK(14)-AKLHDYYKDEVVK(1), STVGHDLNLDVCSKCHPFFTGK(14)-AKLHDYYK(1)	113	1.46e-27	17.8424
8	RL6(86)-RL7(71)	KLQLVGVGYR(1)-VAVIKAVR(5)	106	2.83e-12	n.a.
9	RL9(89)-RL2(183)	AGDEGKLFGSIGTR(6)-KVEADCR(1)	103	2.51e-14	23.0121
10	RS18(30)-RS6(106)	FTAEGVQEIDYKDIATLKNYITESGK(18)-AKDER(2)	101	1.49e-07	n.a.
11	RS7(11)-RS9(100)	KILPDPK(1)-KAGFVTR(1)	98	1.9e-12	13.8162
12	RS8(94)-RS5(167)	KDELPKVMAGLGIAVVSTSK(6)-SVEEILGK(8), DELPKVMAGLGIAVVSTSK(5)-SVEEILGK(8)	92	1.24e-18	n.a.
13	RS18(30)-RS6(104)	DIATLKNYITESGK(6)-TKHAVTEASPMVKAK(13), DIATLKNYITESGK(6)-HAVTEASPMVKAK(11), FTAEGVQEIDYKDIATLKNYITESGK(18)-HAVTEASPMVKAK(11), DIATLKNYITESGK(6)-HAVTEASPMVKAKDER(11)	91	1.85e-18	n.a.
14	RS2(105)-RS5(62)	WLGGMLTNWKTVR(10)-EVPAAIQKAMEK(8)	81	2.81e-15	16.7069
15	RS1(1)-RS2(11)	MTESFAQLFEESLKEIETRPGSIVR(1)-DMLKAGVHFGHQTR(4), MTESFAQLFEESLK(1)-DMLKAGVHFGHQTR(4)	60	1.16e-24	n.a.
16	RL28(62)-RL9(42)	KGIDTVLAELR(1)-KNIEFFEAR(1)	57	3.12e-20	12.8788
17	RS1(464)-RL1(141)	VTAVDAKGATVELADGVEGYLR(7)-GLMPNPKVGTVTPNVAEAVK(7)	56	1.57e-28	n.a.
18	RL5(15)-RL31(47)	KLMTEFNYNSVMQVPR(1)-CHPFFTGKQR(8)	56	4.28e-19	25.7875
19	RS1(14)-RS2(11)	MTESFAQLFEESLKEIETRPGSIVR(14)-DMLKAGVHFGHQTR(4), TESFAQLFEESLKEIETRPGSIVR(13)-DMLKAGVHFGHQTR(4)	54	1.02e-19	n.a.
20	RS3(225)-RS12(10)	GEILGGMAAVEQPEKPAAQPKK(21)-ATVNQLVRKPR(9)	53	8.1e-14	n.a.
21	RL6(29)-RL7(71)	GKNGELTR(2)-VAVIKAVR(5)	48	3.46e-09	n.a.
22	RL20(103)-RL13(12)	ILADIAVFDKVAFTALVEK(10)-TFTAKPETVKR(10)	44	1.9e-20	16.4169
23	RL1(141)-RL33(33)	GLMPNPKVGTVTPNVAEAVK(7)-TKPEKLELK(5)	42	3.11e-10	n.a.
24	RL7(85)-RS3(62)	EAKDLVESAPAALK(3)-IVIERPAKSIR(8)	36	2.78e-15	n.a.
25	RS3(62)-RL7(71)	IVIERPAKSIR(8)-VAVIKAVR(5)	35	9.29e-14	n.a.
26	RL11(40)-RL7(85)	LQVAAGMANPSPPVGPALGQQGVNIMEFCKAFNAK(30)-GATGLGLKEAKDLVESAPAALK(11)	32	3.21e-13	n.a.
27	RL31(39)-RL5(3)	STVGHDLNLDVCSKCHPFFTGK(14)-AKLHDYYKDEVVK(2), STVGHDLNLDVCSKCHPFFTGK(14)-AKLHDYYK(2)	31	6.58e-28	15.6091
28	RS1(504)-RL1(141)	DRVEDATLVLSVGDEVEAKFTGVDR(19)-GLMPNPKVGTVTPNVAEAVK(7)	30	1.11e-20	n.a.
29	RS1(229)-RS11(80)	VKHPSEIVNVGDEITVK(2)-EYGIKNLEVMVK(5)	28	2.25e-13	n.a.
30	RS3(62)-RL31(70)	IVIERPAKSIR(8)-FNIPGSK(7)	28	1.81e-12	n.a.
31	RS7(76)-RS21(40)	SELEAFEVALENVRPTVEVKSR(20)-EFYEKPTTER(5)	28	2.4e-10	40.8012
32	RL5(78)-RL31(70)	KSVAGFKIR(7)-FNIPGSK(7), SVAGFKIR(6)-FNIPGSK(7)	27	9.11e-13	n.a.
33	RS19(28)-RL31(70)	AVESGDKKPLR(7)-FNIPGSK(7)	25	1.6e-12	n.a.
34	RS19(87)-RS13(117)	GHAADKK(6)-KPIKK(4)	25	1.81e-09	n.a.
35	RL5(2)-RL31(47)	AKLHDYYKDEVVK(1)-CHPFFTGKQR(8)	24	3.39e-17	29.7322
36	RS2(11)-RL1(167)	DMLKAGVHFGHQTR(4)-NDKNGIIHTTIGK(3)	24	3.36e-14	n.a.
37	RL31(70)-RS2(2)	FNIPGSK(7)-ATVSMR(1)	22	9.97e-12	n.a.
38	RS1(464)-RS3(108)	VTAVDAKGATVELADGVEGYLR(7)-KPELDAK(1)	22	4.48e-11	n.a.
39	RS2(11)-RL31(70)	DMLKAGVHFGHQTR(4)-FNIPGSK(7)	21	2.83e-11	n.a.
40	RL33(33)-RL1(198)	TKPEKLELK(5)-KAKPTQAK(1)	20	2.59e-12	n.a.
41	RL5(120)-RL31(70)	GLSAKSFDGR(5)-FNIPGSK(7)	19	2.78e-12	n.a.
42	RS1(247)-RL31(70)	VLKFDR(3)-FNIPGSK(7)	19	8.4e-10	n.a.
43	RL14(114)-RL19(37)	FMKIISLAPEVL(3)-VWVVEGSKK(8)	19	1.97e-08	19.7861
44	RS1(229)-RL1(167)	VKHPSEIVNVGDEITVK(2)-NDKNGIIHTTIGK(3)	18	2.66e-17	n.a.
45	RL6(134)-RL7(85)	GNVINLSLGFSHPVDHQLPAGITAECPTQTEIVLKGADK(35)-EAKDLVESAPAALK(3)	17	4.54e-17	n.a.
46	RS19(17)-RL31(70)	KGPFIDLHLLKK(11)-FNIPGSK(7), GPFIDLHLLKK(10)-FNIPGSK(7)	17	1.32e-07	n.a.
47	RS18(30)-RS21(25)	DIATLKNYITESGK(6)-SCEKAGVLAEVR(4)	16	5.75e-16	22.3804
48	RS11(57)-RS21(40)	KSTPFAAQVAAER(1)-EFYEKPTTER(5)	15	1.16e-10	32.3523
49	RL5(2)-RL31(70)	AKLHDYYKDEVVK(1)-FNIPGSK(7)	15	2.19e-10	n.a.
50	RL1(141)-RL9(42)	GLMPNPKVGTVTPNVAEAVK(7)-KNIEFFEAR(1)	14	2.37e-17	n.a.
51	RS1(260)-RS6(104)	VSLGLKQLGEDPWVAIAK(6)-HAVTEASPMVKAK(11)	14	4.02e-16	n.a.
52	RS5(167)-RS8(89)	SVEEILGK(8)-KDELPK(1)	13	3.25e-11	n.a.
53	RS7(149)-RS11(57)	MAEANKAFAHYR(6)-KSTPFAAQVAAER(1)	13	1.13e-10	12.0216
54	RL9(112)-RL28(44)	DIADAVTAAGVEVAKSEVR(15)-FWVESEKR(7)	13	1.99e-10	21.9785
55	RL19(37)-RL7(2)	VWVVEGSKK(8)-SITK(1)	13	2.35e-09	n.a.
56	RL9(42)-RS1(450)	KNIEFFEAR(1)-KGAIVTGK(1)	13	1.69e-08	n.a.
57	RS3(225)-RS10(82)	GEILGGMAAVEQPEKPAAQPKK(21)-LVDIVEPTEKTVDALMR(10)	12	5.35e-16	n.a.
58	RS1(464)-RL1(105)	VTAVDAKGATVELADGVEGYLR(7)-AAGAELVGMEDLADQIKK(17)	12	2.26e-11	n.a.
59	RS3(219)-RS12(10)	GEILGGMAAVEQPEKPAAQPK(15)-ATVNQLVRKPR(9)	12	4.26e-11	n.a.
60	RS19(87)-RS13(118)	GHAADKK(6)-KPIKK(5)	12	2.07e-10	n.a.
61	RS3(89)-RS10(1)	KVVADIAGVPAQINIAEVR(1)-MQNQRIR(1)	12	3.03e-09	n.a.
62	RS1(14)-RS2(2)	MTESFAQLFEESLKEIETRPGSIVR(14)-ATVSMR(1), TESFAQLFEESLKEIETRPGSIVR(13)-ATVSMR(1)	12	4.73e-08	n.a.
63	RL9(83)-RL2(183)	INALETVTIASKAGDEGK(12)-KVEADCR(1)	11	4.16e-14	29.894
64	RL1(141)-RL5(47)	GLMPNPKVGTVTPNVAEAVK(7)-ITLNMGVGEAIADKK(14)	11	4.31e-13	n.a.
65	RL33(50)-RL1(198)	QHVIYKEAK(6)-KAKPTQAK(1)	11	3.23e-12	n.a.
66	RS21(25)-RS18(9)	SCEKAGVLAEVR(4)-KFCR(1), RSCEKAGVLAEVR(5)-KFCR(1)	11	2.81e-07	n.a.
67	RL1(141)-RS1(411)	GLMPNPKVGTVTPNVAEAVK(7)-KGDEIAAVVLQVDAER(1)	10	7.89e-23	n.a.
68	RL10(37)-RL7(71)	GVTVDKMTELR(6)-VAVIKAVR(5)	10	2.35e-13	n.a.
69	RL9(112)-RL25(1)	DIADAVTAAGVEVAKSEVR(15)-MFTINAEVR(1)	10	1.16e-10	174.294
70	RS18(30)-RS21(5)	DIATLKNYITESGK(6)-PVIKVR(4)	10	5.53e-08	17.7624
71	RS6(104)-RS1(247)	HAVTEASPMVKAK(11)-VLKFDR(3)	10	7.28e-07	n.a.
72	RS1(464)-RL9(57)	VTAVDAKGATVELADGVEGYLR(7)-RAELEAKLAEVLAAANAR(7)	9	7.83e-23	n.a.
73	RS1(229)-RS18(30)	VKHPSEIVNVGDEITVK(2)-DIATLKNYITESGK(6)	9	7.13e-21	n.a.
74	RL1(141)-RL33(50)	GLMPNPKVGTVTPNVAEAVK(7)-QHVIYKEAK(6)	9	9.65e-16	n.a.
75	RL5(15)-RL31(70)	KLMTEFNYNSVMQVPR(1)-FNIPGSK(7)	9	1.18e-10	n.a.
76	RL1(105)-RL5(47)	AAGAELVGMEDLADQIKK(17)-ITLNMGVGEAIADKK(14)	9	2.64e-09	n.a.
77	RL10(105)-RL7(71)	ANAKFEVK(4)-VAVIKAVR(5)	9	3.45e-08	n.a.
78	RL19(37)-RS10(1)	VWVVEGSKK(8)-MQNQR(1)	8	1.91e-14	n.a.
79	RS7(149)-RS21(40)	MAEANKAFAHYR(6)-EFYEKPTTER(5)	8	2.14e-12	39.6273
80	RL11(87)-RL7(71)	AAGIKSGSGKPNK(5)-VAVIKAVR(5)	8	3.02e-12	n.a.
81	RL17(121)-RL32(53)	SEKAEAAAE(3)-KVIAK(1)	8	7.75e-08	n.a.
82	RL1(141)-RL33(30)	GLMPNPKVGTVTPNVAEAVK(7)-TKPEKLELK(2)	8	7.59e-07	n.a.
83	RL31(70)-RS21(5)	FNIPGSK(7)-PVIKVR(4)	7	2.17e-08	n.a.
84	RL5(64)-RL31(3)	LLDNAAADLAAISGQKPLITK(16)-KDIHPK(1)	7	2.52e-08	10.8297
85	RL1(105)-RS13(103)	AAGAELVGMEDLADQIKK(17)-TKTNAR(2)	7	6.4e-08	n.a.
86	RL7(71)-RL11(82)	VAVIKAVR(5)-KAAGIK(1)	7	7.62e-07	n.a.
87	RL9(35)-RL25(1)	NFLVPQGKAVPATK(8)-MFTINAEVR(1)	6	4.76e-10	167.592
88	RL9(42)-RS15(2)	KNIEFFEAR(1)-SLSTEATAK(1)	6	9.15e-10	102.7
89	RL19(37)-RL7(71)	VWVVEGSKK(8)-VAVIKAVR(5)	5	3.07e-12	n.a.
90	RL10(97)-RL7(71)	LFKEFAK(3)-VAVIKAVR(5)	5	3.08e-10	n.a.
91	RL6(44)-RL7(71)	TLNDAVEVKHADNTLTFGPR(9)-VAVIKAVR(5)	5	3.86e-08	n.a.
92	RS13(78)-RS19(87)	EISMSIKR(7)-GHAADKK(6)	5	6.71e-08	n.a.
93	RL5(145)-RS13(103)	EQIIFPEIDYDKVDR(12)-TKTNAR(2)	5	1.74e-07	48.2234
94	RL3(7)-RL19(2)	MIGLVGKK(7)-SNIIK(1)	5	1.95e-07	12.938
95	RS1(158)-RS6(106)	VIKLDQK(3)-AKDERR(2), VIKLDQK(3)-AKDER(2)	5	7.18e-07	n.a.
Intra-molecular Cross-links
96	RL9(57)-RL9(42)	RAELEAKLAEVLAAANAR(7)-KNIEFFEAR(1), AELEAKLAEVLAAANAR(6)-KNIEFFEAR(1)	534	6.11e-28	21.1835
97	RL1(167)-RL1(54)	YRNDKNGIIHTTIGK(5)-KSDQNVR(1), NDKNGIIHTTIGK(3)-KSDQNVR(1)	466	1.08e-18	n.a.
98	RL1(141)-RL1(167)	GLMPNPKVGTVTPNVAEAVK(7)-NDKNGIIHTTIGK(3), GLMPNPKVGTVTPNVAEAVK(7)-YRNDKNGIIHTTIGK(5)	433	4.23e-20	n.a.
99	RL5(47)-RL5(69)	ITLNMGVGEAIADKK(14)-PLITKAR(5), ITLNMGVGEAIADKK(14)-LLDNAAADLAAISGQKPLITKAR(21)	230	1.13e-22	13.4293
100	RL1(141)-RL1(54)	GLMPNPKVGTVTPNVAEAVK(7)-KSDQNVR(1)	219	2.18e-17	n.a.
101	RS3(79)-RS3(49)	PGIVIGKKGEDVEK(7)-ELAKASVSR(4), PGIVIGKK(7)-ELAKASVSR(4), VTIHTARPGIVIGKK(14)-ELAKASVSR(4)	210	7.37e-13	15.8862
102	RL5(64)-RL5(47)	LLDNAAADLAAISGQKPLITK(16)-ITLNMGVGEAIADKK(14), LLDNAAADLAAISGQKPLITKAR(16)-ITLNMGVGEAIADKK(14)	185	2.23e-21	17.8186
103	RL9(112)-RL9(42)	DIADAVTAAGVEVAKSEVR(15)-KNIEFFEAR(1)	172	8.16e-20	37.2365
104	RL9(57)-RL9(35)	RAELEAKLAEVLAAANAR(7)-NFLVPQGKAVPATK(8), AELEAKLAEVLAAANAR(6)-NFLVPQGKAVPATK(8)	159	2.5e-17	14.6598
105	RS2(45)-RS2(28)	VHIINLEKTVPMFNEALAELNK(8)-MKPFIFGAR(2)	156	3.28e-16	12.0412
106	RL1(205)-RL1(54)	AKPTQAKGVYIK(7)-KSDQNVR(1), PTQAKGVYIK(5)-KSDQNVR(1)	146	1.82e-15	n.a.
107	RL9(35)-RL9(42)	NFLVPQGKAVPATK(8)-KNIEFFEAR(1)	143	1.35e-13	18.2003
108	RS1(363)-RS1(450)	ANPWQQFAETHNKGDR(13)-KGAIVTGK(1), ANPWQQFAETHNKGDRVEGK(13)-KGAIVTGK(1)	134	2.58e-18	n.a.
109	RS1(504)-RS1(450)	DRVEDATLVLSVGDEVEAKFTGVDR(19)-KGAIVTGK(1), VEDATLVLSVGDEVEAKFTGVDR(17)-KGAIVTGK(1)	132	5.35e-16	n.a.
110	RL9(112)-RL9(35)	DIADAVTAAGVEVAKSEVR(15)-NFLVPQGKAVPATK(8)	122	7.29e-16	20.3584
111	RAIA(29)-RAIA(2)	LEKWQTHLINPHIILSK(3)-TMNITSK(1)	118	1.25e-13	n.a.
112	RL19(87)-RL19(63)	VFQTHSPVVDSISVKR(15)-KISNGEGVER(1)	117	5.81e-27	13.6907
113	RL1(141)-RL1(198)	GLMPNPKVGTVTPNVAEAVK(7)-KAKPTQAK(1)	116	4.67e-20	n.a.
114	RS10(82)-RS10(1)	LVDIVEPTEKTVDALMR(10)-MQNQR(1)	113	1.56e-09	n.a.
115	RS2(59)-RS2(2)	TVPMFNEALAELNKIASR(14)-ATVSMR(1)	106	2.22e-13	n.a.
116	RS21(25)-RS21(40)	SCEKAGVLAEVR(4)-EFYEKPTTER(5)	88	1.69e-13	21.7973
117	RL5(48)-RL5(145)	KLLDNAAADLAAISGQKPLITK(1)-EQIIFPEIDYDKVDR(12)	84	1.1e-14	14.4315
118	RS3(89)-RS3(108)	KVVADIAGVPAQINIAEVR(1)-KPELDAK(1)	82	6.51e-13	29.869
119	RS1(279)-RS1(347)	RYPEGTKLTGR(7)-ISLGLKQCK(6), YPEGTKLTGR(6)-ISLGLKQCK(6)	80	1.68e-15	n.a.
120	RS3(89)-RS3(86)	KVVADIAGVPAQINIAEVR(1)-KGEDVEKLR(7), KVVADIAGVPAQINIAEVR(1)-GEDVEKLR(6)	76	3.68e-10	5.15106
121	RL1(141)-RL1(157)	GLMPNPKVGTVTPNVAEAVK(7)-NAKAGQVR(3)	75	4.06e-10	n.a.
122	RL9(8)-RL9(35)	MQVILLDKVANLGSLGDQVNVK(8)-NFLVPQGKAVPATK(8)	74	2.32e-09	8.20947
123	RL7(85)-RL7(109)	EAKDLVESAPAALK(3)-KALEEAGAEVEVK(1)	71	1.67e-22	n.a.
124	RL1(141)-RL1(31)	GLMPNPKVGTVTPNVAEAVK(7)-QYDINEAIALLKELATAK(12)	67	1.27e-20	n.a.
125	RL11(87)-RL11(81)	AAGIKSGSGKPNK(5)-TPPAAVLLKK(9)	67	8.86e-16	4.31103
126	RL1(197)-RL1(200)	ENLEALLVALKK(11)-AKPTQAK(2), LKENLEALLVALKK(13)-AKPTQAK(2)	66	4.93e-17	n.a.
127	RS3(49)-RS3(80)	ELAKASVSR(4)-KGEDVEK(1)	62	4.29e-10	18.6549
128	RL1(167)-RL1(157)	NDKNGIIHTTIGK(3)-NAKAGQVR(3), YRNDKNGIIHTTIGK(5)-NAKAGQVR(3)	62	6.64e-10	n.a.
129	RS3(38)-RS3(45)	EFADNLDSDFKVR(11)-QYLTKELAK(5)	60	1.63e-10	10.4911
130	RL7(109)-RL7(101)	KALEEAGAEVEVK(1)-EGVSKDDAEALK(5)	59	1.84e-12	n.a.
131	RS2(37)-RS2(28)	NKVHIINLEK(2)-MKPFIFGAR(2)	54	9.24e-15	16.4419
132	RS3(219)-RS3(108)	GEILGGMAAVEQPEKPAAQPK(15)-KPELDAK(1)	54	4.73e-14	n.a.
133	RL7(85)-RL7(71)	EAKDLVESAPAALK(3)-VAVIKAVR(5), EAKDLVESAPAALKEGVSK(3)-VAVIKAVR(5), GATGLGLKEAKDLVESAPAALK(11)-VAVIKAVR(5)	54	2.14e-09	n.a.
134	RL31(62)-RL31(70)	FNKR(3)-FNIPGSK(7), VDRFNKR(6)-FNIPGSK(7)	50	2.63e-09	n.a.
135	RL10(37)-RL10(105)	GVTVDKMTELRK(6)-ANAKFEVK(4), GVTVDKMTELR(6)-ANAKFEVK(4)	47	6.14e-09	13.0982
136	RL6(134)-RL6(29)	GNVINLSLGFSHPVDHQLPAGITAECPTQTEIVLKGADK(35)-GKNGELTR(2)	46	3.02e-24	13.9971
137	RL31(47)-RL31(70)	CHPFFTGKQR(8)-FNIPGSK(7)	46	1.88e-11	n.a.
138	RL9(22)-RL9(42)	VANLGSLGDQVNVKAGYAR(14)-KNIEFFEAR(1)	45	4.76e-16	21.5936
139	RL5(179)-RL5(120)	ALLAAFDFPFRK(12)-GLSAKSFDGR(5)	45	2.51e-11	n.a.
140	RS20(49)-RS20(34)	AAAQKAFNEMQPIVDR(5)-KVYAAIEAGDK(1)	43	7.67e-19	10.3494
141	RL11(51)-RL11(87)	TDSIEKGLPIPVVITVYADR(6)-AAGIKSGSGKPNK(5)	43	1.15e-17	16.4993
142	RS2(11)-RS2(2)	DMLKAGVHFGHQTR(4)-ATVSMR(1), ATVSMRDMLKAGVHFGHQTR(10)-ATVSMRDMLKAGVHFGHQTR(1)	43	4.14e-09	n.a.
143	RS1(434)-RS1(450)	ISLGVKQLAEDPFNNWVALNK(6)-KGAIVTGK(1)	42	3.19e-11	n.a.
144	RS9(2)-RS9(22)	AENQYYGTGR(1)-VFIKPGNGK(4)	42	1.81e-08	n.a.
145	RL22(49)-RL22(42)	KVLESAIANAEHNDGADIDDLKVTK(1)-KAAVLVK(1), KVLESAIANAEHNDGADIDDLK(1)-KAAVLVK(1)	40	8.44e-13	11.0906
146	RL25(68)-RL25(10)	AEFYSEVLTIVVDGKEIK(15)-KEQGK(1)	38	2.61e-11	18.0069
147	RS18(30)-RS18(9)	FTAEGVQEIDYKDIATLKNYITESGK(18)-KFCR(1), DIATLKNYITESGK(6)-KFCR(1)	36	8.93e-10	n.a.
148	RL1(31)-RL1(54)	QYDINEAIALLKELATAK(12)-KSDQNVR(1)	35	8.99e-16	n.a.
149	RL24(47)-RL24(43)	HQKPVPALNQPGGIVEK(3)-VIVEGINLVKK(10)	32	3.44e-18	12.2509
150	RL9(112)-RL9(89)	DIADAVTAAGVEVAKSEVR(15)-AGDEGKLFGSIGTR(6)	32	2.64e-13	24.908
151	RL7(82)-RL7(71)	GATGLGLKEAK(8)-VAVIKAVR(5)	32	2.74e-13	n.a.
152	RL1(141)-RL1(200)	GLMPNPKVGTVTPNVAEAVK(7)-AKPTQAK(2), GLMPNPKVGTVTPNVAEAVK(7)-KAKPTQAK(3)	30	1.2e-12	n.a.
153	RL7(121)-RL7(71)	ALEEAGAEVEVK(12)-VAVIKAVR(5)	30	1.02e-10	n.a.
154	RS20(16)-RS20(19)	AIQSEKAR(6)-KHNASR(1)	29	1.26e-08	5.36935
155	RS3(89)-RS3(80)	KVVADIAGVPAQINIAEVR(1)-KGEDVEK(1)	26	3.66e-12	16.1524
156	RL1(197)-RL1(184)	ENLEALLVALKK(11)-VDFDADKLK(7)	26	1.05e-10	n.a.
157	RS3(225)-RS3(62)	GEILGGMAAVEQPEKPAAQPKK(21)-IVIERPAKSIR(8), GEILGGMAAVEQPEKPAAQPKK(21)-PAKSIR(3)	25	1.56e-17	n.a.
158	RL1(198)-RL1(54)	KAKPTQAK(1)-KSDQNVR(1)	25	2.38e-14	n.a.
159	RL1(200)-RL1(54)	AKPTQAKGVYIK(2)-KSDQNVR(1), AKPTQAK(2)-KSDQNVR(1)	25	1.03e-10	n.a.
160	RS4(83)-RS4(185)	LKGNTGENLLALLEGR(2)-RKPER(2), LKGNTGENLLALLEGR(2)-KPER(1)	25	5.09e-08	13.6927
161	RS6(56)-RS6(106)	LHKAHYVLMNVEAPQEVIDELETTFR(3)-AKDER(2)	25	1.79e-07	n.a.
162	RL9(8)-RL9(57)	MQVILLDKVANLGSLGDQVNVK(8)-RAELEAKLAEVLAAANAR(7), MQVILLDKVANLGSLGDQVNVK(8)-AELEAKLAEVLAAANAR(6)	24	2.09e-26	11.6043
163	RL6(44)-RL6(6)	TLNDAVEVKHADNTLTFGPR(9)-VAKAPVVVPAGVDVK(3)	22	1.34e-20	12.8448
164	RL9(8)-RL9(112)	MQVILLDKVANLGSLGDQVNVK(8)-DIADAVTAAGVEVAKSEVR(15)	21	1.02e-17	22.7234
165	RL7(109)-RL7(71)	KALEEAGAEVEVK(1)-VAVIKAVR(5)	20	1.76e-10	n.a.
166	RL7(71)-RL7(71)	VAVIKAVR(5)-VAVIKAVR(5)	20	2.1e-09	n.a.
167	RL7(96)-RL7(71)	DLVESAPAALKEGVSK(11)-VAVIKAVR(5)	20	2.99e-07	n.a.
168	RL25(46)-RL25(1)	EAPLAIELDHDKVMNMQAK(12)-MFTINAEVR(1)	19	1.42e-20	11.4362
169	RS3(225)-RS3(108)	GEILGGMAAVEQPEKPAAQPKK(21)-KPELDAK(1)	19	2.05e-17	n.a.
170	RL1(186)-RL1(198)	VDFDADKLKENLEALLVALK(9)-KAKPTQAK(1)	19	1.56e-13	n.a.
171	RL7(85)-RL7(121)	EAKDLVESAPAALK(3)-ALEEAGAEVEVK(12)	18	7.01e-22	n.a.
172	RL5(47)-RL5(78)	ITLNMGVGEAIADKK(14)-KSVAGFKIR(7), ITLNMGVGEAIADKK(14)-SVAGFKIR(6)	18	1.33e-17	14.5148
173	RL22(70)-RL22(1)	VLESAIANAEHNDGADIDDLKVTK(21)-METIAK(1)	18	4.41e-13	11.1114
174	RS12(108)-RS12(111)	GALDCSGVKDR(9)-KQAR(1)	17	1.6e-09	9.32839
175	RL7(85)-RL7(101)	EAKDLVESAPAALK(3)-EGVSKDDAEALKK(5)	17	8.78e-09	n.a.
176	RL25(46)-RL25(25)	EAPLAIELDHDKVMNMQAK(12)-AANKFPAIIYGGK(4)	16	7.01e-09	9.62418
177	RS7(76)-RS7(149)	SELEAFEVALENVRPTVEVKSR(20)-MAEANKAFAHYR(6)	15	2.91e-18	11.6203
178	RL9(112)-RL9(57)	DIADAVTAAGVEVAKSEVR(15)-RAELEAKLAEVLAAANAR(7), DIADAVTAAGVEVAKSEVR(15)-AELEAKLAEVLAAANAR(6)	15	1.03e-14	26.5946
179	RS12(108)-RS12(120)	GALDCSGVKDR(9)-YGVKRPK(4), GALDCSGVKDRK(9)-YGVKRPK(4)	15	1.25e-10	10.2208
180	RS12(43)-RS12(51)	VYTTTPKKPNSALR(7)-KVCR(1), VYTTTPKK(7)-PNSALRKVCR(7)	15	6.11e-09	14.1487
181	RS12(108)-RS12(51)	GALDCSGVKDR(9)-KVCR(1)	15	4.73e-08	16.1093
182	RL1(157)-RL1(54)	NAKAGQVR(3)-KSDQNVR(1)	15	1.27e-07	n.a.
183	RL11(51)-RL11(82)	TDSIEKGLPIPVVITVYADR(6)-KAAGIK(1)	15	2.43e-07	12.7784
184	RS1(272)-RS1(279)	QLGEDPWVAIAKR(12)-YPEGTKLTGR(6)	14	2.94e-10	n.a.
185	YGGL(87)-YGGL(93)	KWLEER(1)-KLDEVR(1)	14	4.51e-08	n.a.
186	RS12(30)-RS12(51)	SNVPALEACPQKR(12)-KVCR(1)	12	3.01e-09	19.2912
187	RL22(73)-RL22(1)	VLESAIANAEHNDGADIDDLKVTKIFVDEGPSMK(24)-METIAK(1), VTKIFVDEGPSMK(3)-METIAK(1)	11	4.13e-11	11.8272
188	RS1(272)-RS1(247)	QLGEDPWVAIAKR(12)-VLKFDR(3)	11	7.22e-11	n.a.
189	RS21(40)-RS21(5)	EFYEKPTTER(5)-PVIKVR(4)	11	1.54e-09	32.4832
190	RL7(71)-RL7(2)	VAVIKAVR(5)-SITK(1)	11	5.14e-07	n.a.
191	RS13(78)-RS13(103)	EISMSIKR(7)-TKTNAR(2)	11	1.43e-06	25.8818
192	RS2(81)-RS2(105)	AASEAVKDAALSCDQFFVNHR(7)-WLGGMLTNWKTVR(10)	10	1.97e-13	23.9273
193	RS2(115)-RS2(105)	LKDLETQSQDGTFDK(2)-WLGGMLTNWKTVR(10)	10	9.23e-08	15.618
194	RS4(83)-RS4(77)	LKGNTGENLLALLEGR(2)-NYYKEAAR(4)	9	3.87e-09	12.0548
195	RS6(93)-RS6(106)	TKHAVTEASPMVK(2)-AKDER(2)	9	1.22e-07	n.a.
196	RL1(54)-RL1(14)	KSDQNVR(1)-EKVDATK(2)	9	2.81e-07	n.a.
197	RL6(134)-RL6(86)	GNVINLSLGFSHPVDHQLPAGITAECPTQTEIVLKGADK(35)-KLQLVGVGYR(1)	8	7.58e-29	9.07101
198	RS2(59)-RS2(37)	TVPMFNEALAELNKIASR(14)-NKVHIINLEK(2)	8	5.02e-16	40.1194
199	RS3(219)-RS3(80)	GEILGGMAAVEQPEKPAAQPK(15)-KGEDVEK(1)	8	3.95e-13	n.a.
200	RS10(30)-RS10(1)	LIDQATAEIVETAKR(14)-MQNQR(1)	8	1.02e-11	n.a.
201	RS3(62)-RS3(226)	IVIERPAKSIR(8)-KQQR(1)	8	3.76e-08	n.a.
202	RS19(21)-RS19(29)	KVEKAVESGDK(4)-KPLR(1)	8	1.9e-07	12.8584
203	RL7(85)-RL7(85)	GATGLGLKEAKDLVESAPAALK(11)-GATGLGLKEAKDLVESAPAALK(11)	8	3.29e-07	n.a.
204	RS2(115)-RS2(112)	LKDLETQSQDGTFDK(2)-QSIKR(4)	8	5.28e-07	5.35093
205	RL1(184)-RL1(141)	VDFDADKLKENLEALLVALK(7)-GLMPNPKVGTVTPNVAEAVK(7)	7	1.42e-14	n.a.
206	RL2(265)-RL2(183)	RTDKFIVR(4)-KVEADCR(1), TDKFIVR(3)-KVEADCR(1)	7	9.53e-10	8.58075
207	RS20(64)-RS20(19)	QAAKGLIHK(4)-KHNASR(1)	7	1.22e-07	15.4919
208	RS7(76)-RS7(137)	SELEAFEVALENVRPTVEVKSR(20)-KREDVHR(1)	6	6.01e-12	15.7198
209	RL1(141)-RL1(105)	GLMPNPKVGTVTPNVAEAVK(7)-AAGAELVGMEDLADQIKK(17)	6	2.86e-10	n.a.
210	RL4(194)-RL4(123)	VVMTADAVKQVEEMLA(9)-LIVVEKFSVEAPK(6)	6	1.47e-09	13.034
211	RS13(78)-RS13(110)	EISMSIKR(7)-KGPR(1)	6	4.43e-08	18.4087
212	RL25(34)-RL25(68)	AANKFPAIIYGGKEAPLAIELDHDK(13)-AEFYSEVLTIVVDGKEIK(15)	5	1.14e-18	17.1351
213	RL9(22)-RL9(1)	VANLGSLGDQVNVKAGYAR(14)-MQVILLDK(1)	5	1.29e-17	6.459
214	RS2(11)-RS2(37)	DMLKAGVHFGHQTR(4)-NKVHIINLEK(2)	5	4.99e-15	25.2441
215	RS3(225)-RS3(80)	GEILGGMAAVEQPEKPAAQPKK(21)-KGEDVEK(1)	5	3.35e-13	n.a.
216	RL2(125)-RL2(97)	AGDQIQSGVDAAIKPGNTLPMR(14)-SANIALVLYKDGERR(10)	5	1.31e-12	18.2768
217	RS1(528)-RS1(450)	AKDEADEKDAIATVNK(8)-KGAIVTGK(1)	5	7.64e-11	n.a.
218	RL28(10)-RL28(26)	VCQVTGKRPVTGNNR(7)-SHALNATKR(8)	5	1.26e-07	19.4882
219	RL2(125)-RL2(108)	AGDQIQSGVDAAIKPGNTLPMR(14)-YILAPKGLK(6)	5	2.39e-07	11.8165
220	RL2(183)-RL2(207)	KVEADCR(1)-VLGKAGAAR(4)	5	3.76e-07	41.8916
221	RL33(50)-RL33(33)	QHVIYKEAK(6)-TKPEKLELK(5)	5	1.71e-06	7.05763
222	RS4(156)-RS4(151)	VKAALELAEQR(2)-KQSR(1)	5	1.76e-06	5.81323
Summary
		#Cross-links identified in 70S ribosomes
		Inter-molecular	Intra-molecular		Total
Total		95	127		222
Structure available		26	70		96
Compatible (≤ 22 Å)		13	59		72
%Compatible (≤ 22 Å)		0.5	0.84		0.75
Compatible (≤ 30 Å)		19	66		85
%Compatible (≤ 30 Å)		0.73	0.94		0.89
Filtering criteria: FDR < 5%, E-value < 0.00001, and spectral count ≥ 5. Identified cross-links are sorted using spectral count as the primary key in ascending order, and using the best E-value as the secondary key in descending order. Peptide pairs that could not be distinguished as intra-molecular cross-links or inter-molecular cross-links were assigned as intra-molecular.
