# Supplementary material for: Trifunctional cross-linker for mapping protein-protein interaction networks and comparing protein conformational states
Source: eLife journal article supplement (doi:10.7554/elife.12509), 2016-03-03
Supplement: supp [file elife-12509-supp-v1.zip › elife_poa_e12509_Figure_4_source_data_2.xlsx]

## Sheet: Sheet1
Figure 4—source data 2. Number of cross-linked lysine pairs classified by ribosomal proteins
Ribosomal protein	Inter-molecular	Intra-molecular	Total
RS1	19	7	26
RL1	16	19	35
RL7/12	16	12	28
RL31	16	2	18
RL9	12	12	24
RL5	12	5	17
RS3	8	12	20
RS2	8	9	17
RS21	7	2	9
RL6	6	3	9
RS18	6	1	7
RS6	5	2	7
RS13	5	2	7
RL19	5	1	6
RL33	5	1	6
RS19	5	1	6
RS7	4	2	6
RL28	4	1	5
RL11	3	3	6
RS10	3	2	5
RL10	3	1	4
RS5	3	0	3
RS11	3	0	3
RS12	2	5	7
RL2	2	4	6
RL25	2	4	6
RS8	2	0	2
RS9	1	1	2
RL3	1	0	1
RL13	1	0	1
RL14	1	0	1
RL17	1	0	1
RL20	1	0	1
RL32	1	0	1
RS15	1	0	1
RL22	0	3	3
RS4	0	3	3
RS20	0	3	3
RL4	0	1	1
RL24	0	1	1
Total	190	125	315
