# Supplementary material for: Trifunctional cross-linker for mapping protein-protein interaction networks and comparing protein conformational states
Source: eLife journal article supplement (doi:10.7554/elife.12509), 2016-03-03
Supplement: supp [file elife-12509-supp-v1.zip › elife_poa_e12509_Figure_4_source_data_3.xlsx]

## Sheet: Sheet1
Figure 4—source data 3. Identified cross-linked lysine pairs involving L1
No.	Protein1-Protein2	Peptide1-Peptide2	#Spectra	Best E-value	Ca-Ca Distance (Å) L1 not rotated (PDB code: 2WWL, 2WWQ)	Ca-Ca Distance (Å) L1 rotated (modeled based on 4GD1, 3R8S, and 4KCZ)	Distance Difference
1	RS1(464)-RL1(54)	VTAVDAKGATVELADGVEGYLR(7)-KSDQNVR(1)	157	3.23e-16	n.a.	n.a.	n.a.
2	RS1(464)-RL1(141)	VTAVDAKGATVELADGVEGYLR(7)-GLMPNPKVGTVTPNVAEAVK(7)	56	1.57e-28	n.a.	n.a.	n.a.
3	RL1(141)-RL33(33)	GLMPNPKVGTVTPNVAEAVK(7)-TKPEKLELK(5)	42	3.11e-10	66.5448	23.7402	-42.8046
4	RS1(504)-RL1(141)	DRVEDATLVLSVGDEVEAKFTGVDR(19)-GLMPNPKVGTVTPNVAEAVK(7)	30	1.11e-20	n.a.	n.a.	n.a.
5	RS2(11)-RL1(167)	DMLKAGVHFGHQTR(4)-NDKNGIIHTTIGK(3)	24	3.36e-14	n.a.	131.187	n.a.
6	RL33(33)-RL1(198)	TKPEKLELK(5)-KAKPTQAK(1)	20	2.59e-12	71.6997	27.0277	-44.672
7	RS1(229)-RL1(167)	VKHPSEIVNVGDEITVK(2)-NDKNGIIHTTIGK(3)	18	2.66e-17	n.a.	n.a.	n.a.
8	RL1(141)-RL9(42)	GLMPNPKVGTVTPNVAEAVK(7)-KNIEFFEAR(1)	14	2.37e-17	54.6096	75.1595	20.5499
9	RS1(464)-RL1(105)	VTAVDAKGATVELADGVEGYLR(7)-AAGAELVGMEDLADQIKK(17)	12	2.26e-11	n.a.	n.a.	n.a.
10	RL1(141)-RL5(47)	GLMPNPKVGTVTPNVAEAVK(7)-ITLNMGVGEAIADKK(14)	11	4.31e-13	89.213	39.6028	-49.6102
11	RL33(50)-RL1(198)	QHVIYKEAK(6)-KAKPTQAK(1)	11	3.23e-12	68.054	25.8353	-42.2187
12	RL1(141)-RS1(411)	GLMPNPKVGTVTPNVAEAVK(7)-KGDEIAAVVLQVDAER(1)	10	7.89e-23	n.a.	n.a.	n.a.
13	RL1(141)-RL33(50)	GLMPNPKVGTVTPNVAEAVK(7)-QHVIYKEAK(6)	9	9.65e-16	62.5099	26.179	-36.3309
14	RL1(105)-RL5(47)	AAGAELVGMEDLADQIKK(17)-ITLNMGVGEAIADKK(14)	9	2.64e-09	86.4188	38.9904	-47.4283
15	RL1(141)-RL33(30)	GLMPNPKVGTVTPNVAEAVK(7)-TKPEKLELK(2)	8	7.59e-07	73.924	27.7913	-46.1327
16	RL1(105)-RS13(103)	AAGAELVGMEDLADQIKK(17)-TKTNAR(2)	7	6.4e-08	126.353	58.4313	-67.9218
Distances were measured in both the crystal structure where L1 is not rotated (PDB code: 2WWL, 2WWQ) and in the model where L1 is rotated. Distance difference refers to the distance in the rotated conformation minus the distance in the nonrotated conformation.
