# Supplementary material for: Trifunctional cross-linker for mapping protein-protein interaction networks and comparing protein conformational states
Source: eLife journal article supplement (doi:10.7554/elife.12509), 2016-03-03
Supplement: supp [file elife-12509-supp-v1.zip › elife_poa_e12509_Figure_4_source_data_4.xlsx]

## Sheet: Sheet1
Figure 4—source data 4. CXMS analysis of the Saccharomyces cerevisiae exosome complex
No.	Protein1-Protein2	Peptide1-Peptide2	#Spectra	Best E-value	Ca-Ca Distance (Å) (PDB code: 4IFD)	Interaction type
Inter-molecular Cross-links
1	RRP45(284)-RRP44(741)	ITDQILQLLKEDSEK(10)-KIYDAFPQTAMLR(1), ITDQILQLLKEDSEKR(10)-KIYDAFPQTAMLR(1), ITDQILQLLKEDSEKR(10)-KIYDAFPQTAMLRR(1)	398	1.62e-23	15.2825	exo-exo
2	RRP41(204)-RRP44(876)	LSLLLVEDKIPLDR(9)-DKNKMDMICR(4), LSLLLVEDKIPLDRLENVLAIGIAGAHR(9)-DKNKMDMICR(4), LSLLLVEDKIPLDR(9)-NKMDMICR(2)	143	5.3e-20	16.0305	exo-exo
3	RRP41(62)-RRP4(125)	LKSQMDTSK(2)-WKVDIGGK(2)	116	2.87e-16	12.7834	exo-exo
4	RRP46(37)-RRP41(62)	VICSVTGPIEPKAR(12)-LKSQMDTSK(2)	88	3.02e-18	16.533	exo-exo
5	RRP40(176)-MPP6(113)	QLLFNNDFPLLKVLAAHTK(12)-KTFGDNSDDSGSR(1)	86	1.16e-20	n.a.	exo-other
6	MTR3(16)-RRP45(130)	LLGPAAAKPMAFSNTTTHVPEKK(8)-SGALDVEGLCIVAGSKCWAVR(16), LLGPAAAKPMAFSNTTTHVPEKK(8)-RSGALDVEGLCIVAGSKCWAVR(17), LLGPAAAKPMAFSNTTTHVPEK(8)-SGALDVEGLCIVAGSKCWAVR(16)	86	4.18e-20	16.5386	exo-exo
7	RRP46(37)-RRP45(2)	VICSVTGPIEPKAR(12)-AKDIEISASESK(1)	74	8.42e-16	8.86513	exo-exo
8	RRP44(741)-RRP45(241)	KIYDAFPQTAMLR(1)-DGVLTVTLNKNR(10), KIYDAFPQTAMLRR(1)-DGVLTVTLNKNR(10)	60	4.53e-19	15.7378	exo-exo
9	RRP4(151)-RRP41(62)	KSESDELQMR(1)-LKSQMDTSK(2), RKSESDELQMR(2)-LKSQMDTSK(2)	45	1.56e-13	31.4757	exo-exo
10	CSL4(116)-RRP43(45)	NILVSVLPGTEKGR(12)-KYEEFRDVAIENNTLSR(1), NILVSVLPGTEKGR(12)-KYEEFR(1)	35	1.35e-18	n.a.	exo-exo
11	CSL4(89)-RRP4(235)	EGTDQSTEEEKSVDASPNDVTR(11)-KTSQMDLAR(1), TDQEEEREGTDQSTEEEKSVDASPNDVTR(18)-KTSQMDLAR(1)	26	2.66e-17	n.a.	exo-exo
12	RRP41(204)-RRP44(874)	LSLLLVEDKIPLDR(9)-DKNKMDMICR(2), LSLLLVEDKIPLDRLENVLAIGIAGAHR(9)-DKNKMDMICR(2)	26	1.9e-12	15.3301	exo-exo
13	RRP4(353)-IF4A(279)	NVMESIGSDILTAEKMR(15)-VEELTTKLR(7)	23	1.71e-20	n.a.	exo-other
14	RRP44(497)-RRP45(292)	DLGTIESAQAETEALLLEHDVEYRPFSKK(28)-NKYAAMLTSENAR(2)	21	2.73e-09	60.5893	exo-exo
15	RRP45(2)-RRP41(62)	AKDIEISASESK(1)-LKSQMDTSK(2)	19	5.48e-10	14.4816	exo-exo
16	RRP41(62)-RRP4(122)	LKSQMDTSK(2)-IAEVGNKR(7)	17	2.41e-12	17.4832	exo-exo
17	IF4A(279)-RRP4(235)	VEELTTKLR(7)-KTSQMDLAR(1)	15	1.52e-09	n.a.	exo-other
18	RRP42(253)-PRS10(63)	QGLAMVEKYAPDVVR(8)-KLLEHRR(1)	15	2.02e-08	n.a.	exo-other
19	RRP45(241)-RRP44(530)	DGVLTVTLNKNR(10)-LDDPEAVSKDPLLTKR(15), DGVLTVTLNKNR(10)-DPLLTKR(6)	14	9.89e-10	17.4788	exo-exo
20	CSL4(42)-RRP43(45)	DGEDIIFNYVPGPGTKLIQYEHNGR(16)-KYEEFR(1)	13	7.85e-11	46.4415	exo-exo
21	RRP45(3)-RRP41(62)	AKDIEISASESK(2)-LKSQMDTSK(2)	13	1.05e-10	16.8455	exo-exo
22	RRP40(108)-RRP4(151)	KNRPTLQVGDLVYAR(1)-KSESDELQMR(1)	11	7.7e-12	24.586	exo-exo
23	IF4A(279)-RRP44(2)	VEELTTKLR(7)-SVPAIAPR(1)	11	4.93e-10	n.a.	exo-other
24	CSL4(219)-RRP4(151)	VKVIECFKPGDIVR(2)-KSESDELQMR(1)	10	2.6e-12	26.1786	exo-exo
25	RRP41(88)-RRP44(34)	SKSSHKNER(2)-NGGATKIVR(6), SKSSHK(2)-NGGATKIVR(6)	10	1.7e-09	17.2889	exo-exo
26	CSL4(116)-RRP4(151)	NILVSVLPGTEKGR(12)-KSESDELQMR(1)	9	3.41e-13	n.a.	exo-exo
27	MTR3(231)-RRP42(240)	CKEQYNR(2)-SFKPHLLK(3)	9	3.61e-07	13.5683	exo-exo
28	RRP44(22)-IF4A(279)	LADGLSVTQKVFVR(10)-VEELTTKLR(7)	7	1.38e-16	n.a.	exo-other
29	RRP43(280)-MTR3(31)	ETYEIICDQTKSVPLMINAK(11)-KSTDLTPK(1)	7	2.65e-12	n.a.	exo-exo
30	RRP45(289)-RRP44(599)	ITDQILQLLKEDSEKR(15)-GTSVYLVDKR(9)	6	2.84e-14	58.1929	exo-exo
31	CSL4(42)-RRP42(237)	DGEDIIFNYVPGPGTKLIQYEHNGR(16)-SVALNDSNVKSFKPHLLK(10)	6	2.62e-09	15.2624	exo-exo
32	RRP41(62)-RRP44(1)	LKSQMDTSK(2)-MSVPAIAPR(1)	6	4.23e-08	n.a.	exo-exo
33	RRP41(54)-RRP4(122)	IITLVKGPK(6)-IAEVGNKR(7)	5	6.46e-19	30.087	exo-exo
34	RRP44(34)-RRP41(83)	NGGATKIVR(6)-FSKFER(3)	5	1.23e-06	10.4331	exo-exo
35	RRP45(292)-RRP44(599)	NKYAAMLTSENAR(2)-GTSVYLVDKR(9)	4	3.54e-14	58.3207	exo-exo
36	RRP4(164)-MTR3(132)	SFLKEGDLLNAEVQSLFQDGSASLHTR(4)-YPKSGIDIFVYLTYDK(3)	4	6.26e-14	13.9871	exo-exo
37	RRP44(741)-RRP45(292)	KIYDAFPQTAMLR(1)-NKYAAMLTSENAR(2)	4	2.07e-13	23.8946	exo-exo
38	RRP4(235)-SKI7(111)	KTSQMDLAR(1)-ENELPTKR(7)	4	7.74e-11	n.a.	exo-other
39	RRP4(255)-FKBP4(48)	DTPSANNSSSIKSTGPTGAVSLNPSITR(12)-KPSTLR(1)	4	9.19e-07	n.a.	exo-other
40	RRP44(497)-RRP45(42)	DLGTIESAQAETEALLLEHDVEYRPFSKK(28)-DVEITFGKEFGDVSVK(8)	4	1.31e-06	62.0312	exo-exo
41	HSP74(515)-HSP71/72(523)	LSKEDIDKMVAEAEK(8)-FKEEDEKESQR(2)	4	1.36e-06	n.a.	other-other
42	RS27A(48)-RRP44(599)	LIFAGKQLEDGR(6)-GTSVYLVDKR(9)	3	1.2e-14	n.a.	exo-other
43	RRP45(55)-RRP4(122)	MGNTKVHCR(5)-IAEVGNKR(7)	3	9.95e-09	52.1599	exo-exo
Intra-molecular Cross-links
44	RRP45(284)-RRP45(292)	ITDQILQLLKEDSEKR(10)-NKYAAMLTSENAR(2), ITDQILQLLKEDSEK(10)-NKYAAMLTSENAR(2), ITDQILQLLKEDSEK(10)-RNKYAAMLTSENAR(3)	216	7.57e-22	12.1201
45	RRP44(511)-RRP44(524)	KVLECLPAEGHDWKAPTK(14)-LDDPEAVSKDPLLTK(9), VLECLPAEGHDWKAPTK(13)-LDDPEAVSKDPLLTK(9), VLECLPAEGHDWKAPTK(13)-LDDPEAVSKDPLLTKR(9), KVLECLPAEGHDWKAPTK(14)-LDDPEAVSKDPLLTKR(9)	194	2.93e-23	13.4442
46	RRP4(255)-RRP4(235)	DTPSANNSSSIKSTGPTGAVSLNPSITR(12)-KTSQMDLAR(1)	170	2.55e-19	n.a.
47	RRP44(243)-RRP44(124)	SLVQYIELLPNADDIRDSIPQMDSFDKDLER(27)-NKSYPVYTR(2), DSIPQMDSFDKDLER(11)-NKSYPVYTR(2), DSIPQMDSFDKDLERDTFSDFTFPEYYSTAR(11)-NKSYPVYTR(2)	166	1.13e-17	n.a.
48	G3P3(63)-G3P3(71)	YAGEVSHDDKHIIVDGK(10)-KIATYQER(1)	141	1.69e-20	n.a.
49	PMG1(169)-PMG1(57)	LLPYWQDVIAKDLLSGK(11)-VYPDVLYTSKLSR(10), LLPYWQDVIAKDLLSGK(11)-KVYPDVLYTSKLSR(11)	91	6.54e-16	n.a.
50	RRP4(151)-RRP4(122)	KSESDELQMR(1)-IAEVGNKR(7), RKSESDELQMR(2)-IAEVGNKR(7)	90	5.93e-15	14.0128
51	RRP44(186)-RRP44(54)	TCQWYSEHLKPYDINVVLVTNDR(10)-SCTKCPQIVVPDAQNELPK(4), KTCQWYSEHLKPYDINVVLVTNDR(11)-SCTKCPQIVVPDAQNELPK(4)	87	2.01e-32	12.7037
52	RRP44(22)-RRP44(124)	LADGLSVTQKVFVR(10)-NKSYPVYTR(2)	87	1.83e-13	19.6665
53	CSL4(285)-CSL4(219)	AANGAGGLMYATDWQMMTSPVTGATEKR(27)-VKVIECFKPGDIVR(2), AANGAGGLMYATDWQMMTSPVTGATEKRK(27)-VKVIECFKPGDIVR(2)	86	1.07e-27	10.7328
54	RRP4(164)-RRP4(151)	SFLKEGDLLNAEVQSLFQDGSASLHTR(4)-KSESDELQMR(1)	81	6.96e-20	20.6445
55	RRP4(255)-RRP4(151)	DTPSANNSSSIKSTGPTGAVSLNPSITR(12)-KSESDELQMR(1), DTPSANNSSSIKSTGPTGAVSLNPSITR(12)-RKSESDELQMR(2)	72	1.41e-22	n.a.
56	RRP45(284)-RRP45(241)	ITDQILQLLKEDSEKR(10)-DGVLTVTLNKNR(10), ITDQILQLLKEDSEK(10)-DGVLTVTLNKNR(10)	70	3.6e-19	17.9908
57	RRP44(993)-RRP44(995)	SVMDPITSKR(9)-KAELLLK(1)	65	5.56e-17	5.89924
58	RRP44(176)-RRP44(207)	KTCQWYSEHLKPYDINVVLVTNDR(1)-EAATKEVESNIITK(5)	62	8.59e-18	15.5674
59	MPP6(113)-MPP6(104)	KTFGDNSDDSGSR(1)-KPEGVISGR(1)	54	3.24e-15	n.a.
60	RRP44(375)-RRP44(995)	LLAKDAMIAQR(4)-KAELLLK(1)	53	6.41e-11	46.9612
61	RRP44(176)-RRP44(2)	KTCQWYSEHLKPYDINVVLVTNDR(1)-SVPAIAPR(1)	51	6.69e-20	n.a.
62	RRP44(54)-RRP44(2)	SCTKCPQIVVPDAQNELPK(4)-SVPAIAPR(1)	48	1.09e-15	n.a.
63	HSP60(69)-HSP60(79)	NVLIEQPFGPPKITK(12)-DGVTVAKSIVLK(7)	48	7.94e-14	n.a.
64	RRP44(920)-RRP44(375)	NNESTETGYVIKVFNNGIVVLVPK(12)-LLAKDAMIAQR(4)	45	5.97e-16	40.4251
65	RS27A(63)-RS27A(48)	TLSDYNIQKESTLHLVLR(9)-LIFAGKQLEDGR(6)	44	6.15e-11	n.a.
66	RRP44(741)-RRP44(530)	KIYDAFPQTAMLR(1)-DPLLTKR(6), KIYDAFPQTAMLR(1)-LDDPEAVSKDPLLTKR(15)	42	1.79e-14	18.3627
67	EF2(50)-EF2(61)	AGIISAAKAGEAR(8)-FTDTRKDEQER(6), AGIISAAKAGEAR(8)-KDEQER(1)	42	1.68e-11	n.a.
68	RRP44(207)-RRP44(2)	EAATKEVESNIITK(5)-SVPAIAPR(1)	40	1.62e-16	n.a.
69	KPYK1(30)-KPYK1(42)	TSIIGTIGPKTNNPETLVALR(10)-KAGLNIVR(1)	40	8.3e-13	n.a.
70	CSL4(89)-CSL4(71)	EGTDQSTEEEKSVDASPNDVTR(11)-KTDQEEER(1), EGTDQSTEEEKSVDASPNDVTR(11)-CEEEKKTDQEEER(6), EGTDQSTEEEKSVDASPNDVTRR(11)-CEEEKKTDQEEER(6)	39	2.89e-20	n.a.
71	SAHH(413)-SAHH(38)	ILDEAVAKFHLGNLGVR(8)-KAYGDVQPLK(1)	39	4.36e-16	n.a.
72	EF2(50)-EF2(2)	AGIISAAKAGEAR(8)-VAFTVDQMR(1)	39	2.95e-12	n.a.
73	HSP60(230)-HSP60(69)	GFISPYFITDPKSSK(12)-NVLIEQPFGPPKITK(12)	34	2.13e-14	n.a.
74	HSP60(101)-HSP60(69)	LLQEVASKTNEAAGDGTTSATVLGR(8)-NVLIEQPFGPPKITK(12)	31	2.94e-17	n.a.
75	G6PI(118)-G6PI(95)	ANKPMYVDGVNVAPEVDSVLK(3)-DAMFKGEHINSTEDR(5)	31	3.57e-14	n.a.
76	RRP40(176)-RRP40(224)	QLLFNNDFPLLKVLAAHTK(12)-NDTAAFKDIAKR(7), QLLFNNDFPLLKVLAAHTK(12)-NDTAAFKDIAK(7)	31	2.65e-09	8.9459
77	YD13A(368)-YD13A(357)	RNPSDEKNDSR(7)-NSKPNYR(3), NPSDEKNDSR(6)-NSKPNYR(3)	31	3.55e-09	n.a.
78	HSP71(54)-HSP71(243)	LIGDAAKNQAAMNPSNTVFDAK(7)-LVNHFIQEFKR(10)	29	9.95e-16	n.a.
79	RRP44(54)-RRP44(22)	SCTKCPQIVVPDAQNELPK(4)-LADGLSVTQKVFVR(10)	29	6.98e-10	29.7196
80	SDO1L(65)-SDO1L(77)	GAEGELGAASKAQVENEFGK(11)-KIEEVIDLILR(1)	28	1.65e-17	n.a.
81	RRP44(461)-RRP44(124)	IVISIDSWPTTHKYPLGHFVR(13)-NKSYPVYTR(2)	28	9.48e-15	26.4605
82	PGK(90)-PGK(48)	ELQSLLGKDVTFLNDCVGPEVEAAVK(8)-IVAALPTIKYVLEHHPR(9)	28	6.63e-14	n.a.
83	EF1A(242)-EF1A(253)	TLLEAIDAIEQPSRPTDKPLR(18)-LPLQDVYKIGGIGTVPVGR(8)	27	2.87e-24	n.a.
84	OYE2(151)-OYE2(154)	YDSASDNVYMNAEQEEKAK(17)-KANNPQHSITK(1)	26	4.51e-23	n.a.
85	ENO1/2(397)-ENO1/2(409)	TGQIKTGAPAR(5)-LAKLNQLLR(3)	26	4.95e-10	n.a.
86	MPP6(128)-MPP6(113)	KFDEGEQNEDEKR(1)-KTFGDNSDDSGSR(1)	24	3.4e-22	n.a.
87	ENO2(288)-ENO2(338)	WLTGVELADMYHSLMKR(16)-KAADALLLK(1)	23	2.63e-21	n.a.
88	RRP45(42)-RRP45(292)	SFDQFRDVEITFGKEFGDVSVK(14)-NKYAAMLTSENAR(2), DVEITFGKEFGDVSVK(8)-NKYAAMLTSENAR(2)	23	4.17e-21	14.3602
89	RRP44(368)-RRP44(375)	APSSIVLDSEHFDVNDNPDIEAGDDDDNNESSSNTTVISDKQR(41)-LLAKDAMIAQR(4)	23	3.35e-17	10.8021
90	RRP45(289)-RRP45(42)	ITDQILQLLKEDSEKR(15)-DVEITFGKEFGDVSVK(8), ITDQILQLLKEDSEKR(15)-SFDQFRDVEITFGKEFGDVSVK(14)	23	9.18e-15	11.2292
91	ADH1(319)-ADH1(207)	SPIKVVGLSTLPEIYEK(4)-VLGIDGGEGKEELFR(10)	22	1.53e-11	n.a.
92	PMG1(17)-PMG1(31)	HGQSEWNEKNLFTGWVDVK(9)-LSAKGQQEAAR(4)	22	3.5e-09	n.a.
93	HSP60(474)-HSP60(467)	PAKQIIENAGEEGSVIIGK(3)-KAITR(1)	21	3.11e-08	n.a.
94	HSP60(507)-HSP60(55)	GYDASKSEYTDMLATGIIDPFK(6)-GVETLAEAVAATLGPKGR(16)	20	3.5e-16	n.a.
95	HSP60(230)-HSP60(238)	GFISPYFITDPKSSK(12)-VEFEKPLLLLSEK(5)	20	7.56e-16	n.a.
96	EF1G2(90)-EF1G2(90)	LLGSDVIEKSQILR(9)-LLGSDVIEKSQILR(9)	17	1.25e-16	n.a.
97	HS104(205)-HS104(337)	IKSNPCLIGEPGIGK(2)-FQKIEVAEPSVR(3)	17	4.13e-11	n.a.
98	HS104(442)-HS104(446)	DEDADSTTKDR(9)-LKLAR(2)	17	9.37e-10	n.a.
99	FKS1(275)-FKS1(292)	AMEEANPEDTEETLNKIEGDNSLEAADFR(16)-AKMNQLSPLER(2)	15	2.32e-13	n.a.
100	HSP71/72(504)-HSP71/72(509)	SNKITITNDKGR(10)-LSKEDIEK(3), ITITNDKGR(7)-LSKEDIEK(3)	15	1.47e-09	n.a.
101	CSL4(26)-CSL4(2)	LICPQYGTENKDGEDIIFNYVPGPGTK(11)-ACNFQFPEIAYPGK(1)	14	2.69e-22	16.3098
102	RRP45(289)-RRP45(292)	ITDQILQLLKEDSEKR(15)-NKYAAMLTSENAR(2)	14	5.88e-17	5.17545
103	RRP44(616)-RRP44(599)	IDMLPMLLGTDLCSLKPYVDR(16)-GTSVYLVDKR(9)	14	2.05e-10	21.037
104	PMG1(71)-PMG1(44)	AIQTANIALEKADRLWIPVNR(11)-AGELLKEK(6), AIQTANIALEKADR(11)-AGELLKEK(6)	14	1.3e-07	n.a.
105	CYPH(42)-CYPH(29)	ALCTGEKGFGYAGSPFHR(7)-LYNDIVPKTAENFR(8)	13	4.16e-16	n.a.
106	RRP41(54)-RRP41(62)	IITLVKGPK(6)-LKSQMDTSK(2), IITLVKGPKEPR(6)-LKSQMDTSK(2)	13	4.88e-12	17.6204
107	FAS2(284)-FAS2(248)	LGSEADAKAFLDSMAQK(8)-KYLQTR(1)	13	3.66e-09	n.a.
108	CSL4(26)-CSL4(104)	LICPQYGTENKDGEDIIFNYVPGPGTK(11)-TVKNILVSVLPGTEK(3)	12	5.05e-25	13.0449
109	RRP44(599)-RRP44(993)	GTSVYLVDKR(9)-SVMDPITSKR(9)	12	8.42e-15	20.7283
110	RL19A/B(146)-RL19A/B(153)	ALVEHIIQAKADAQR(10)-EKALNEEAEAR(2)	12	5.97e-14	n.a.
111	G3P1(55)-G3P1(55)	YKGTVSHDDK(2)-YKGTVSHDDK(2)	12	3.47e-09	n.a.
112	RRP44(375)-RRP44(297)	LLAKDAMIAQR(4)-FSKPVLIVGQK(3)	12	4.55e-09	13.2798
113	UGPA1(301)-UGPA1(280)	LLEVAQVPKEHIDEFK(9)-ADVKGGTLISYDGQVR(4)	11	1.17e-16	n.a.
114	RRP44(22)-RRP44(2)	LADGLSVTQKVFVR(10)-SVPAIAPR(1)	11	3.81e-14	n.a.
115	ENO1(88)-ENO1(139)	DQKAVDDFLISLDGTANK(3)-HLADLSKSK(7)	11	1.66e-09	n.a.
116	PSA2(91)-PSA2(88)	KVAHTSYK(1)-VLVDKSR(5), KVAHTSYKR(1)-VLVDKSR(5)	11	4.77e-09	n.a.
117	RRP44(124)-RRP44(34)	NKSYPVYTR(2)-NGGATKIVR(6)	11	6.73e-09	20.804
118	PDC1(249)-PDC1(269)	LIDLTQFPAFVTPMGKGSIDEQHPR(16)-YGGVYVGTLSKPEVK(11)	11	9.77e-09	n.a.
119	RRP44(69)-RRP44(497)	CPQIVVPDAQNELPKFILSDSPLELSAPIGK(15)-DLGTIESAQAETEALLLEHDVEYRPFSKK(28)	10	1.2e-11	14.4982
120	HSP77(337)-HSP77(344)	AQFETLTAPLVKR(12)-TVDPVKK(6)	10	6.6e-10	n.a.
121	RS27A(48)-RS27A(48)	LIFAGKQLEDGR(6)-LIFAGKQLEDGR(6)	10	1.99e-09	n.a.
122	RRP44(558)-RRP44(679)	KLPNGNWEVGVHIADVTHFVKPGTALDAEGAAR(1)-ALLKLSVK(4)	10	1.58e-08	12.8225
123	HSP75/76(58)-HSP75/75(73)	LIGDAAKNQAALNPR(7)-NTVFDAKR(7)	9	2.34e-14	n.a.
124	RRP44(969)-RRP44(1001)	LTFVPTNSDKPR(10)-KAELLLK(7)	9	1.26e-11	n.a.
125	EF2(391)-EF2(61)	MVPTSDKGR(7)-KDEQER(1)	9	4.25e-10	n.a.
126	HSP75/76(497)-HSP75/76(608)	VTAVEKSTGK(6)-VVTKAMSSR(4)	9	5.13e-10	n.a.
127	HSP60(93)-HSP60(79)	DKFENMGAKLLQEVASK(9)-DGVTVAKSIVLK(7)	9	6.7e-08	n.a.
128	RRP44(664)-RRP44(679)	IDDKTQNDELTMGMR(4)-ALLKLSVK(4)	9	4.03e-07	14.982
129	HSP82(610)-HSP82(594),HSC82(606)-HSC82(590)	DSSMSSYMSSKK(11)-IMKAQALR(3)	8	2.76e-13	n.a.
130	HS104(380)-HS104(337)	ILDSALVTAAQLAKR(14)-FQKIEVAEPSVR(3)	8	2.54e-12	n.a.
131	CSL4(15)-CSL4(116)	ACNFQFPEIAYPGKLICPQYGTENKDGEDIIFNYVPGPGTK(14)-NILVSVLPGTEKGR(12), ACNFQFPEIAYPGKLICPQYGTENK(14)-NILVSVLPGTEKGR(12)	8	3.97e-11	n.a.
132	HXKA(423)-HXKA(2)	TGHIAADGSVYNKYPGFK(13)-VHLGPK(1)	8	2.9e-10	n.a.
133	G3P2/3(257)-G3P2/3(261)	ETTYDEIKK(8)-VVKAAAEGK(3), LNKETTYDEIKK(11)-VVKAAAEGK(3)	8	8.43e-10	n.a.
134	O74302|YD13A(322)-O74302|YD13A(357)	GLSGEYKFLR(7)-NSKPNYR(3)	8	5.12e-09	n.a.
135	RRP44(22)-RRP44(34)	LADGLSVTQKVFVR(10)-NGGATKIVR(6)	8	5.05e-08	10.8082
136	HSP75/76(573)-HSP75/76(608)	SKIEAALSDALAALQIEDPSADELR(2)-VVTKAMSSR(4)	8	6.06e-08	n.a.
137	RRP44(719)-RRP44(664)	KLLATNSLVEEFMLLANISVAR(1)-IDDKTQNDELTMGMR(4)	7	9.43e-21	22.2312
138	RRP44(664)-RRP44(741)	IDDKTQNDELTMGMR(4)-KIYDAFPQTAMLR(1)	7	9.1e-18	38.8542
139	HSP82(98)-HSP82(44),HSC82(98)-HSC82(44)	AELINNLGTIAKSGTK(12)-ELISNASDALDKIR(12)	7	1.14e-17	n.a.
140	RRP41(110)-RRP41(195)	MFEKNVMLNIYPR(4)-SEKLSLLLVEDK(3)	7	1.68e-13	12.6216
141	ADH1(207)-ADH1(335)	VLGIDGGEGKEELFR(10)-MEKGQIVGR(3)	7	1.16e-09	n.a.
142	O74302|YD13A(322)-O74302|YD13A(368)	GLSGEYKFLR(7)-NPSDEKNDSR(6)	7	1.96e-09	n.a.
143	HXKG(312)-HXKG(355)	YDVVIDQKLSTNPGFHLFEK(8)-SKEQLPR(2)	7	9.99e-09	n.a.
144	RRP44(461)-RRP44(243)	IVISIDSWPTTHKYPLGHFVR(13)-SLVQYIELLPNADDIRDSIPQMDSFDKDLER(27), IVISIDSWPTTHKYPLGHFVR(13)-DSIPQMDSFDKDLER(11)	7	1.14e-08	n.a.
145	TSA1(89)-TSA1(89)	KEGGLGPINIPLLADTNHSLSR(1)-KEGGLGPINIPLLADTNHSLSR(1)	6	4.25e-17	n.a.
146	HSP72(54)-HSP72(243)	LIGDAAKNQAAMNPANTVFDAK(7)-LVNHFIQEFKR(10)	6	6.84e-11	n.a.
147	RRP44(207)-RRP44(124)	EAATKEVESNIITK(5)-NKSYPVYTR(2)	6	1.09e-10	30.1834
148	RRP44(461)-RRP44(375)	IVISIDSWPTTHKYPLGHFVR(13)-LLAKDAMIAQR(4)	6	1.29e-09	34.7202
149	RRP44(616)-RRP44(511)	IDMLPMLLGTDLCSLKPYVDR(16)-VLECLPAEGHDWKAPTK(13)	6	5.94e-09	12.2052
150	HSP60(287)-HSP60(293)	RPLLIIAEDVDGEALAACILNKLR(22)-GQVKVCAVK(4)	6	2.71e-08	n.a.
151	H3(57)-H3(65)	FQKSTELLIR(3)-KLPFQR(1)	6	2.42e-07	n.a.
152	HSP60(247)-HSP60(293)	KISSIQDILPALEISNQSR(1)-GQVKVCAVK(4)	6	4.7e-07	n.a.
153	POB3(29)-POB3(43)	IADSGLGWKISTSGGSAANQAR(9)-KPFLLPATELSTVQWSR(1)	5	2.71e-19	n.a.
154	UBA1(270)-UBA1(139)	SLKQQLSNPEFVFSDFAK(3)-VKINEFCHSSGIR(2)	5	9.17e-19	n.a.
155	HSP77(72)-HSP77(83)	TTPSVVAFTKEGER(10)-LVGIPAKR(7)	5	2.96e-14	n.a.
156	RRP44(616)-RRP44(664)	IDMLPMLLGTDLCSLKPYVDR(16)-IDDKTQNDELTMGMR(4)	5	3.43e-14	26.0395
157	HSP75/76(608)-HSP75/76(603)	VVTKAMSSR(4)-AEVGLKR(6)	5	1.19e-10	n.a.
158	RRP44(969)-RRP44(995)	LTFVPTNSDKPR(10)-KAELLLK(1)	5	4.15e-10	29.6675
159	HS104(470)-HS104(410)	YNEEKHGHEELTQAK(5)-DSKPEELDSK(3)	5	4.52e-10	n.a.
160	CSL4(104)-CSL4(71)	TVKNILVSVLPGTEK(3)-KTDQEEER(1)	5	1.05e-09	11.5395
161	RL16A(91)-RL16A(96),RL16B(90)-RL16B(95)	GMVSHKTAR(6)-GKAALER(2)	5	5.29e-09	n.a.
162	RRP46(37)-RRP46(64)	VICSVTGPIEPKAR(12)-EKVLEDK(2)	5	8.78e-08	20.2234
163	HSP75/76(428)-HSP75/76(608)	NTTVPTIKR(8)-VVTKAMSSR(4)	5	1.18e-07	n.a.
164	HSP82(611)-HSP82(594),HSC82(607)-HSC82(590)	KTFEISPK(1)-IMKAQALR(3)	5	7.66e-07	n.a.
165	DED1(223)-DED1(294)	KAYPTAVIMAPTR(1)-GKISLANVK(2)	5	7.91e-07	n.a.
166	MPP6(128)-MPP6(104)	KFDEGEQNEDEKR(1)-KPEGVISGR(1)	4	1.16e-18	n.a.
167	RRP44(176)-RRP44(54)	KTCQWYSEHLKPYDINVVLVTNDR(1)-SCTKCPQIVVPDAQNELPK(4)	4	2.62e-10	19.7055
168	RRP43(2)-RRP43(45)	AESTTLETIEIHPITFPPEVLAR(1)-KYEEFR(1)	4	2.98e-09	n.a.
169	MTR3(215)-MTR3(231)	NGEEIVGFWKDDGDDEDLLECLDR(10)-CKEQYNR(2)	4	1.1e-08	15.1182
170	HSP75/76(58)-HSP75/76(497)	LIGDAAKNQAALNPR(7)-VTAVEKSTGK(6)	4	2.65e-08	n.a.
171	LEU1(188)-LEU1(139)	KLTKDDPSQQATR(1)-EHLIKR(5)	4	2.85e-08	n.a.
172	ALF(10)-ALF(8)	KTGVIVGEDVHNLFTYAK(1)-GVEQILKR(7)	4	5.17e-08	n.a.
173	CSL4(116)-CSL4(119)	NILVSVLPGTEKGR(12)-KTNKYANNDFANNLPK(1), NILVSVLPGTEKGR(12)-KTNK(1)	4	6.86e-08	n.a.
174	RRP4(151)-RRP4(235)	KSESDELQMR(1)-KTSQMDLAR(1)	4	7.16e-08	33.4575
175	BMH1/2(51)-BMH1/2(125)	NLLSVAYKNVIGAR(8)-VFYYKMK(5)	4	1.57e-07	n.a.
176	PMG1(47)-PMG1(44)	KVYPDVLYTSK(1)-AGELLKEK(6)	4	1.66e-07	n.a.
177	HSP71(584)-HSP71(592)	KAEETISWLDSNTTASKEEFDDK(17)-LKELQDIANPIMSK(2)	4	2.19e-07	n.a.
178	AIP1(204)-AIP1(230)	THHKQGSFVR(4)-KISCFDGK(1)	4	8.59e-07	n.a.
179	DCS2(37)-DCS2(2)	VISLLGSIDGKDAVLTAEK(11)-GSQDLASLIGR(1)	3	3.18e-12	n.a.
180	TSA1(29)-TSA1(132)	TAVVDGVFDEVSLDKYKGK(15)-GLFIIDPKGVIR(8)	3	3.32e-12	n.a.
181	CSL4(122)-CSL4(116)	KTNKYANNDFANNLPK(4)-NILVSVLPGTEKGR(12), TNKYANNDFANNLPK(3)-NILVSVLPGTEKGR(12)	3	2.32e-11	n.a.
182	PMG1(169)-PMG1(175)	LLPYWQDVIAKDLLSGK(11)-DLLSGKTVMIAAHGNSLR(6)	3	9.66e-10	n.a.
183	KPYK1(86)-KPYK1(69)	PLAIALDTKGPEIR(9)-KSEELYPGR(1)	3	8.71e-09	n.a.
184	HSP26(114)-HSP26(151)	VVVPGVKSK(7)-VKESSSGK(2)	3	9.97e-09	n.a.
185	CDC48(346)-CDC48(246)	VVSQLLTLMDGMKAR(13)-AIGIKPPR(5)	3	1.85e-08	n.a.
186	RPN9(379)-RPN9(383)	LVEWNDQVEKLGK(10)-KMEAR(1)	3	1.96e-08	n.a.
187	EF2(2)-EF2(61)	VAFTVDQMR(1)-KDEQER(1)	3	2.26e-08	n.a.
188	PMG1(139)-PMG1(133)	YKYVDPNVLPETESLALVIDR(2)-SFDVPPPPIDASSPFSQKGDER(18)	3	2.5e-08	n.a.
189	TPS1(261)-TPS1(268)	FVNVGAFPIGIDVDKFTDGLK(15)-KESVQK(1)	3	6.73e-08	n.a.
190	HSP82(44)-HSP82(48)	ELISNASDALDKIR(12)-YKSLSDPK(2)	3	8.8e-08	n.a.
191	HSP26(195)-HSP26(202)	LKPQKDGK(5)-NHVKK(4)	3	2.97e-07	n.a.
192	HS104(327)-HS104(258)	SIVEKDGAFER(5)-YKGDFEER(2)	3	6.26e-07	n.a.
193	CSL4(89)-CSL4(70)	EGTDQSTEEEKSVDASPNDVTRR(11)-CEEEKKTDQEEER(5)	3	1.64e-06	n.a.
194	RRP44(537)-RRP44(532)	DKLICSIDPPGCVDIDDALHAK(2)-RKDLR(2)	3	4.16e-06	n.a.
195	EF1A(242)-EF1A(217)	TLLEAIDAIEQPSRPTDKPLR(18)-ETKAGVVK(3)	3	4.58e-06	n.a.
Summary
		#Cross-links identified in the exosome complex
		Inter-Molecular	Intra-Molecular			Total
Total		43	152			195
Structure available		28	44			72
Compatible		17	33			50
%Compatible		0.61	0.75			0.69
Filtering criteria: FDR < 5%, E-value < 0.00001, and spectral count ≥ 3. Identified cross-links were sorted and assigned as described in the analysis of ribosomes. Cross-links between two exosome core components, between a core component and another protein, and between two non-core proteins are designated as exo-exo, exo-other, and other-other, respectively.
