# Supplementary material for: Trifunctional cross-linker for mapping protein-protein interaction networks and comparing protein conformational states
Source: eLife journal article supplement (doi:10.7554/elife.12509), 2016-03-03
Supplement: supp [file elife-12509-supp-v1.zip › elife_poa_e12509_Figure_5_figure_supplement_1.pdf]

**A**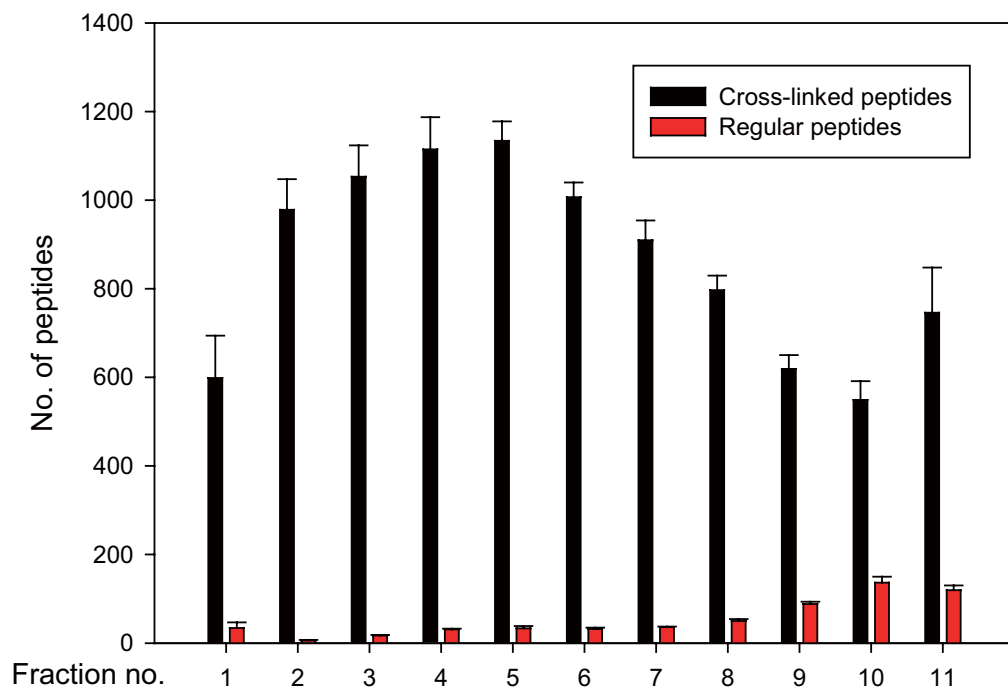**B**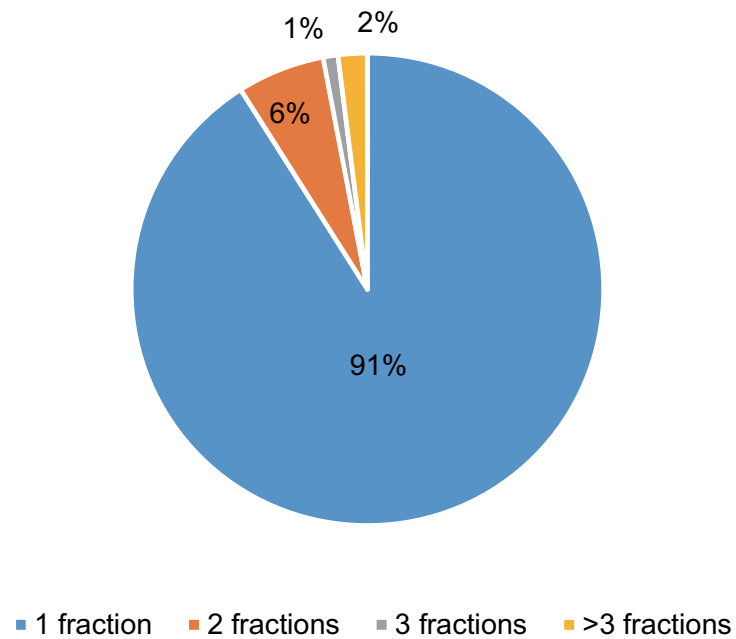

**Figure 5—figure supplement 1. Fractionation of digested, Leiker-treated *E. coli* lysates.**

(A) Efficient partitioning of cross-linked peptides. (B) More than 90% of the peptides were uniquely identified in only one fraction.
