# Supplementary material for: Trifunctional cross-linker for mapping protein-protein interaction networks and comparing protein conformational states
Source: eLife journal article supplement (doi:10.7554/elife.12509), 2016-03-03
Supplement: supp [file elife-12509-supp-v1.zip › elife_poa_e12509_Figure_5_figure_supplement_2.pdf]

***E. coli* whole-cell lysate**

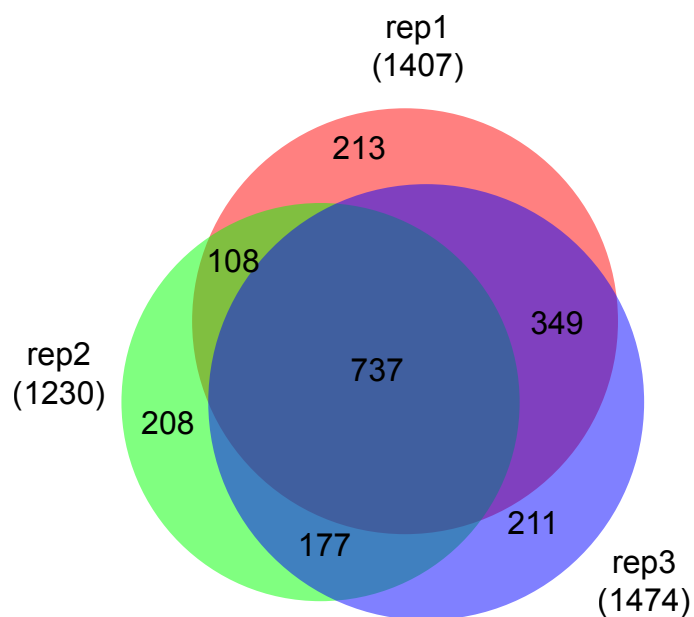

***E. coli* ribo-free lysate**

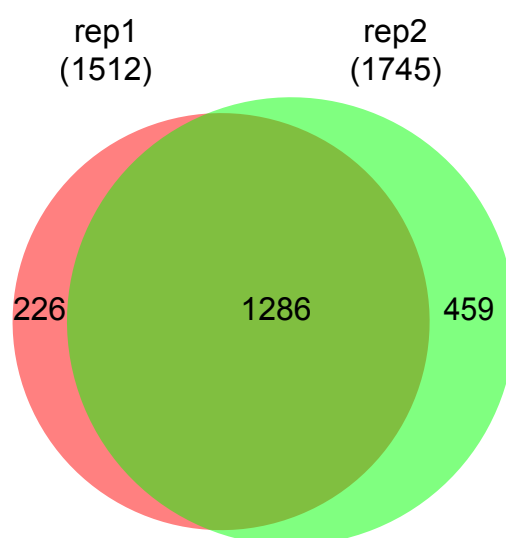

**Figure 5—figure supplement 2. Overlap of cross-linked lysine pairs between biological replicates of *E. coli* lysates (FDR < 0.05, E-value < 0.01, and spectral count ≥ 3).**
