# Supplementary material for: Trifunctional cross-linker for mapping protein-protein interaction networks and comparing protein conformational states
Source: eLife journal article supplement (doi:10.7554/elife.12509), 2016-03-03
Supplement: supp [file elife-12509-supp-v1.zip › elife_poa_e12509_Figure_5_figure_supplement_3.pdf]

**A**

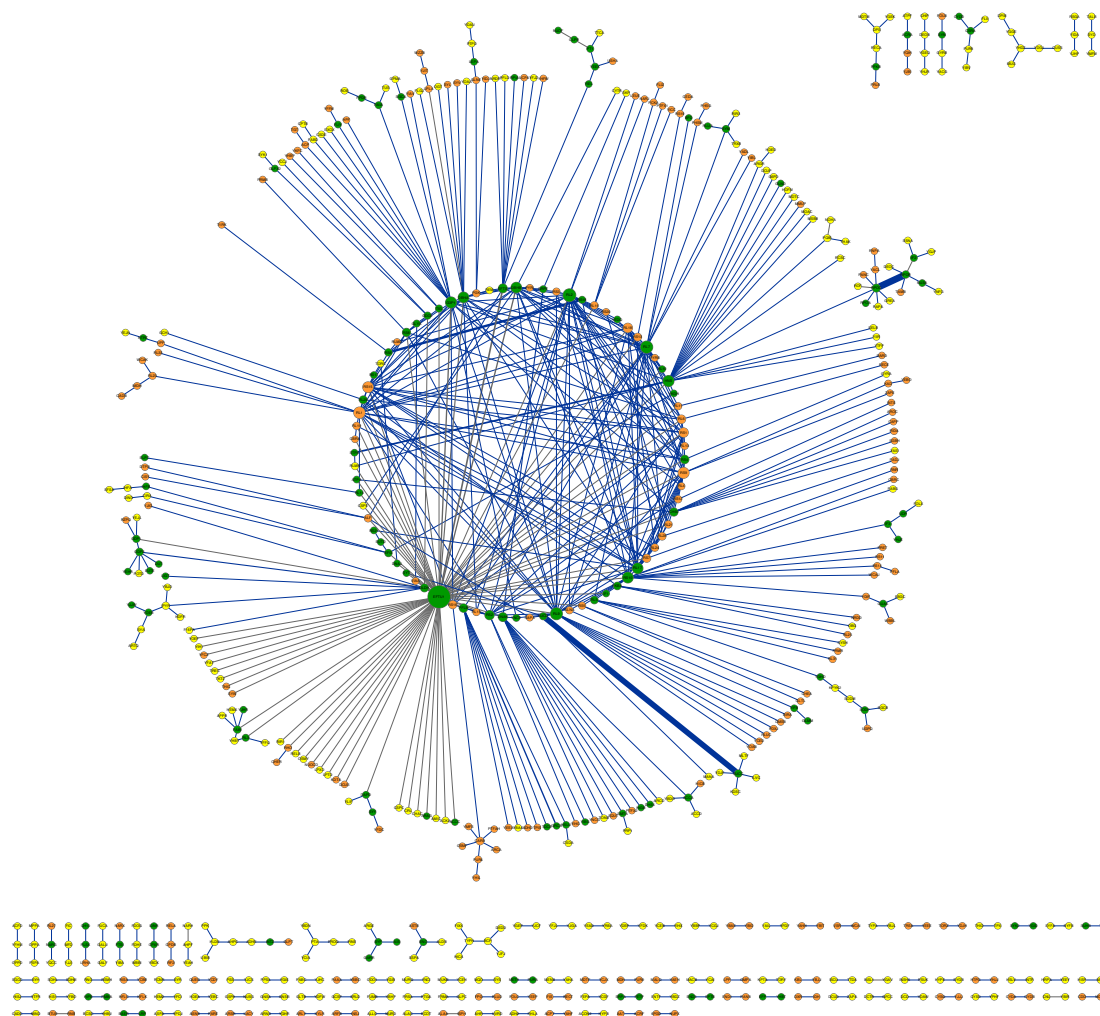

**B**

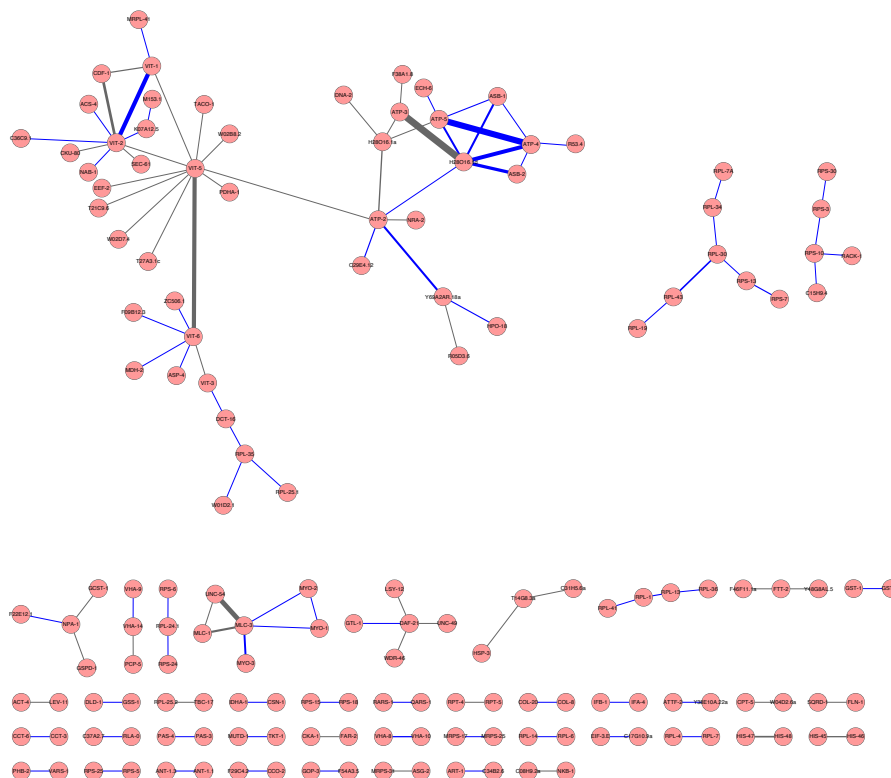

**Figure 5—figure supplement 3. Protein-protein interaction networks constructed from the cross-links identified in (A) *E. coli* and (B) *C. elegans*.**

The labeling scheme is the same as described in **Figure 5A** except the node color. For *E. coli*, node color is set to orange if the protein was only identified in the whole-cell lysates, to yellow only identified in the ribo-free lysates, or to green if identified in both. There are 626 proteins in the *E. coli* network and 155 proteins in the *C. elegans* network.
