# Supplementary material for: Trifunctional cross-linker for mapping protein-protein interaction networks and comparing protein conformational states
Source: eLife journal article supplement (doi:10.7554/elife.12509), 2016-03-03
Supplement: supp [file elife-12509-supp-v1.zip › elife_poa_e12509_Figure_5_source_data_1.xlsx]

## Sheet: Sheet1
Figure 5—source data 1. CXMS analysis of E. coli whole-cell lysates
No.	Protein1-Protein2	Peptide1-Peptide2	#Spectra	Best E-value	Identified in 2012*?	Identified in the ppi database?	Structure in PDB?	Cα-Cα ≤ 22 Å?	Distance (Å)
Inter-molecular Cross-links
1	RS6(93)-RS18(50)	TKHAVTEASPMVK(2)-AKYQR(2)	280	1.97e-07	√	√	√	√	11.6953
2	SUCC(146)-SUCD(256)	VAEETPHLIHKVALDPLTGPMPYQGR(11)-MGHAGAIIAGGKGTADEK(12)	173	1.35e-19		√	√	√	16.9687
3	RPOB(844)-RPOC(50)	DTKLGPEEITADIPNVGEAALSK(3)-TFKPER(3)	84	1.08e-07		√	√	√	11.8069
4	DNAK(421)-GRPE(66)	NTTIPTKHSQVFSTAEDNQSAVTIHVLQGER(7)-VKAEMENLR(2)	78	1.19e-14		√			n.a.
5	RS7(11)-RS9(100)	KILPDPK(1)-KAGFVTR(1)	70	2.93e-10	√		√	√	11.4433
6	RL10(97)-RL7/12(71)	LFKEFAK(3)-VAVIKAVR(5)	68	5.1e-11		√	√		51.7178
7	RPOB(163)-RPOC(781)	SPGVFFDSDKGKTHSSGK(12)-KGLADTALK(1), GKTHSSGK(2)-KGLADTALK(1)	65	1.15e-10	√	√	√	√	20.9309
8	HNS(6)-STPA(2)	SEALKILNNIR(5)-SVMLQSLNNIR(1)	63	2.11e-06		√			n.a.
9	EFTU1(264)-G3P1(108),EFTU2(264)-G3P1(108)	KLLDEGR(1)-KHITAGAK(1)	59	6.97e-11					n.a.
10	GLNA(353)-RL2(207)	IPVVSSPKAR(8)-VLGKAGAAR(4)	49	1.28e-12					n.a.
11	RL9(112)-G3P1(108)	DIADAVTAAGVEVAKSEVR(15)-KHITAGAK(1)	49	2.77e-12					n.a.
12	ODP2(317)-DLDH(339)	AEGKSEFAENDAYVHATPLIR(4)-KHYFDPK(1)	49	2.36e-11		√			n.a.
13	PFLB(643)-GRCA(62)	DQKGAVASLTSVAK(3)-EVPVEVKPEVR(7)	48	8.22e-14		√			n.a.
14	RL7/12(71)-EFTU1(264),RL7/12(71)-EFTU2(264)	VAVIKAVR(5)-KLLDEGR(1)	48	2.22e-08					n.a.
15	RL7/12(71)-G3P1(108)	VAVIKAVR(5)-KHITAGAK(1)	42	1.42e-10					n.a.
16	DBHA(67)-EFTU1(264),DBHA(67)-EFTU2(264)	NPQTGKEIK(6)-KLLDEGR(1)	42	1.77e-10					n.a.
17	DBHB(67)-EFTU1(264),DBHB(67)-EFTU2(264)	NPQTGKEITIAAAK(6)-KLLDEGR(1)	42	2.83e-09					n.a.
18	RPOC(521)-RPOA(1)	DCVNAKGEGMVLTGPK(6)-MQGSVTEFLKPR(1)	40	1.33e-13		√	√		50.8399
19	RL10(37)-RL7/12(71)	GVTVDKMTELR(6)-VAVIKAVR(5)	39	5.36e-10		√	√		47.3846
20	RL10(144)-RL7/12(71)	LMATMKEASAGK(6)-VAVIKAVR(5)	38	2.58e-10		√			n.a.
21	RL1(105)-RS15(73)	AAGAELVGMEDLADQIKK(17)-KDVAR(1)	38	1.35e-07			√		142.988
22	RL7/12(85)-RL10(37)	EAKDLVESAPAALK(3)-GVTVDKMTELR(6), GATGLGLKEAKDLVESAPAALK(11)-GVTVDKMTELR(6)	36	2.21e-08		√	√		47.0333
23	RS10(11)-FKBA(110)	LKAFDHR(2)-VKSSAQAK(2)	35	2.92e-08					n.a.
24	RPOB(900)-RPOC(50)	GETQLTPEEKLLR(10)-TFKPER(3)	34	2.09e-06		√	√	√	20.5021
25	DNAK(55)-YNCE(124)	TTPSIIAYTQDGETLVGQPAKR(21)-TGEVKGR(5)	34	4e-06					n.a.
26	SGBH(1)-CH60(327)	MSRPLLQLALDHSSLEAAQRDVTLLK(1)-VVINKDTTTIIDGVGEEAAIQGR(5)	34	9.36e-06					n.a.
27	RPOB(844)-RPOC(66)	DTKLGPEEITADIPNVGEAALSK(3)-IFGPVKDYECLCGK(6)	32	4.02e-18		√	√	√	15.4453
28	EFTU1(57)-DBHB(67),EFTU2(57)-DBHB(67)	AFDQIDNAPEEKAR(12)-NPQTGKEITIAAAK(6)	32	1.14e-16					n.a.
29	RL9(112)-RL1(54)	DIADAVTAAGVEVAKSEVR(15)-KSDQNVR(1)	31	8.84e-11			√		65.4529
30	RL1(141)-RL33(50)	GLMPNPKVGTVTPNVAEAVK(7)-QHVIYKEAK(6)	30	5.21e-10		√	√	√	19.0192
31	HNS(57)-EFTU1(264),HNS(57)-EFTU2(264)	KLQQYR(1)-KLLDEGR(1)	30	1.07e-08					n.a.
32	RPOC(66)-RPOB(914)	IFGPVKDYECLCGK(6)-ASDVKDSSLR(5)	30	3.32e-06		√	√	√	18.1771
33	RS18(30)-RS6(104)	DIATLKNYITESGK(6)-HAVTEASPMVKAK(11)	29	7.77e-16	√	√	√	√	10.5867
34	GRCA(88)-PFLB(63)	ETLEDAVKHPEK(8)-VMEGVKLENR(6)	29	4.49e-11		√			n.a.
35	PYRB(179)-PYRI(137)	TVHSLTQALAKFDGNR(11)-ANDIALKCK(7)	29	1.16e-09	√	√	√	√	19.3634
36	RL17(99)-RL2(207)	ILKCGFR(3)-VLGKAGAAR(4)	29	3.09e-07		√	√		82.0368
37	HNS(83)-MMUP(15)	EMLIADGIDPNELLNSLAAVKSGTKAK(21)-TMKTR(3)	29	2.34e-05					n.a.
38	G3P1(124)-RL7/12(71)	VVMTGPSKDNTPMFVK(8)-VAVIKAVR(5)	28	1.42e-10					n.a.
39	ODP2(313)-DLDH(339)	AEAPAAAPAAKAEGK(11)-KHYFDPK(1)	27	1.29e-11		√			n.a.
40	DBHB(67)-PGK(27)	NPQTGKEITIAAAK(6)-ADLNVPVKDGK(8)	27	1.12e-10					n.a.
41	RL1(54)-EFTU1(264),RL1(54)-EFTU2(264)	KSDQNVR(1)-KLLDEGR(1)	27	3.3e-10			√		165.841
42	DBHA(67)-RL7/12(71)	NPQTGKEIK(6)-VAVIKAVR(5)	27	8.64e-09					n.a.
43	ALF(115)-EFTS(214)	KLLPWIDGLLDAGEK(1)-EIAEKMVEGR(5)	27	7.26e-06					n.a.
44	RL9(57)-RS15(73)	AELEAKLAEVLAAANAR(6)-KDVAR(1), RAELEAKLAEVLAAANAR(7)-KDVAR(1)	27	0.000263			√		114.029
45	FETP(28)-ERPA(2)	EAEGQDFQLYPGELGKR(16)-SDDVALPLEFTDAAANK(1)	26	2.17e-10					n.a.
46	RL19(87)-EFTU1(264),RL19(87)-EFTU2(264)	VFQTHSPVVDSISVKR(15)-KLLDEGR(1)	26	1.49e-08			√		53.6139
47	EFG(541)-YKGH(1)	GQYGHVVIDMYPLEPGSNPKGYEFINDIKGGVIPGEYIPAVDK(29)-MREQIK(1)	25	9.28e-05					n.a.
48	RL1(141)-RL33(10)	GLMPNPKVGTVTPNVAEAVK(7)-IKLVSSAGTGHFYTTTK(2)	24	4.48e-28		√	√		25.9906
49	CARB(649)-PUR4(18)	GVIVQYGGQTPLKLAR(13)-INKLLAR(3)	24	6.04e-10					n.a.
50	RL7/12(71)-RL2(207)	VAVIKAVR(5)-VLGKAGAAR(4)	24	2.9e-09		√	√		141.1
51	EFG(153)-EFTU1(264),EFG(153)-EFTU2(264)	MGANFLKVVNQIK(7)-KLLDEGR(1)	24	5.17e-08		√			n.a.
52	GRCA(62)-PFLB(2)	EVPVEVKPEVR(7)-SELNEK(1)	23	1.68e-10		√			n.a.
53	RL2(183)-EFTU1(264),RL2(183)-EFTU2(264)	KVEADCR(1)-KLLDEGR(1)	23	2.93e-10			√		136.464
54	RPOC(1072)-RPOB(265)	TAGGKDLRPALK(5)-VYVEKGR(5)	23	3.43e-10		√	√		25.027
55	RS16(76)-RL2(108)	VAALIKEVNK(6)-YILAPKGLK(6)	23	8.22e-10			√		72.1508
56	RS8(2)-EFTU1(264),RS8(2)-EFTU2(264)	SMQDPIADMLTR(1)-KLLDEGR(1)	23	4.77e-08			√		99.88
57	PT1(404)-CLPB(558),PT1(404)-SUFE(9),PT1(404)-YPHG(628),PT1(404)-QUEF(214)	KEIEIYK(1)-EKLLR(2)	23	0.000963					n.a.
58	EFTS(177)-RPIA(7)	HIAMHVAASKPEFIKPEDVSAEVVEK(10)-TQDELKK(6)	22	1.32e-05					n.a.
59	RL31(39)-RL5(2)	STVGHDLNLDVCSKCHPFFTGK(14)-AKLHDYYKDEVVK(1)	21	4.58e-22			√	√	17.8424
60	RL9(112)-EFTU1(264),RL9(112)-EFTU2(264)	DIADAVTAAGVEVAKSEVR(15)-KLLDEGR(1)	21	2.19e-16			√		164.002
61	RPOC(66)-RPOB(890)	IFGPVKDYECLCGK(6)-VTPKGETQLTPEEK(4)	21	3.31e-10		√	√	√	14.1501
62	RL9(112)-G3P1(124)	DIADAVTAAGVEVAKSEVR(15)-VVMTGPSKDNTPMFVK(8)	21	1.4e-09					n.a.
63	RS10(11)-EFTU1(264),RS10(11)-EFTU2(264)	LKAFDHR(2)-KLLDEGR(1)	21	1.72e-09			√		134.308
64	DBHB(67)-DBHA(67)	NPQTGKEITIAAAK(6)-NPQTGKEIK(6)	21	7.44e-09		√			n.a.
65	RL7/12(71)-RL11(82)	VAVIKAVR(5)-KAAGIK(1)	21	6.21e-07		√	√		31.5724
66	DBHB(67)-RL1(54)	NPQTGKEITIAAAK(6)-KSDQNVR(1)	20	1.21e-11					n.a.
67	RL1(141)-RL33(33)	GLMPNPKVGTVTPNVAEAVK(7)-TKPEKLELK(5)	20	1.5e-08		√	√	√	18.0132
68	CH60(277)-ATPA(388)	VAAVKAPGFGDR(5)-KLSGGIR(1)	20	1.07e-07					n.a.
69	USHA(377)-YEEX(33)	LEGDRDKVR(7)-EIQDVEKK(7)	20	2.42e-07					n.a.
70	RS4(22)-RL17(99)	EGTDLFLKSGVR(8)-ILKCGFR(3)	20	3.12e-06		√	√		62.6041
71	RS5(126)-RS10(1)	AVLEVAGVHNVLAKAYGSTNPINVVR(14)-MQNQR(1)	19	2.52e-10		√	√		108.69
72	EFTU1(57)-DBHA(67),EFTU2(57)-DBHA(67)	AFDQIDNAPEEKAR(12)-NPQTGKEIK(6)	19	1.56e-09					n.a.
73	RL2(207)-EFTU1(264),RL2(207)-EFTU2(264)	VLGKAGAAR(4)-KLLDEGR(1)	19	2.18e-06			√		101.201
74	RL7/12(71)-PYRB(2)	VAVIKAVR(5)-ANPLYQK(1)	19	3.96e-06					n.a.
75	RS9(2)-RL17(99)	AENQYYGTGR(1)-ILKCGFR(3)	19	5.51e-06		√	√		216.085
76	PYRI(94)-DBHB(67)	IDNYEVVGKSRPSLPER(9)-NPQTGKEITIAAAK(6)	18	1.24e-08					n.a.
77	RL7/12(71)-HNS(57)	VAVIKAVR(5)-KLQQYR(1)	18	1.31e-08					n.a.
78	RL10(37)-EFTU1(264),RL10(37)-EFTU2(264)	GVTVDKMTELR(6)-KLLDEGR(1)	18	5.92e-07			√		87.706
79	ODP2(302)-DLDH(278)	QEAAAPAPAAKAEAPAAAPAAK(11)-VPNGKNLDAGK(5)	18	1.8e-06		√			n.a.
80	RL7/12(71)-RL10(2)	VAVIKAVR(5)-ALNLQDK(1)	18	2.01e-06		√	√		72.6034
81	EFTS(281)-EFTU1(57),EFTS(281)-EFTU2(57)	VETDFAAEVAAMSKQS(14)-AFDQIDNAPEEKAR(12)	17	5.06e-15		√			n.a.
82	RL1(105)-G3P1(108)	AAGAELVGMEDLADQIKK(17)-KHITAGAK(1)	17	3.57e-13					n.a.
83	RPOC(1132)-RPOB(163)	IPQESGGTKDITGGLPR(9)-GKTHSSGK(2), IPQESGGTKDITGGLPR(9)-SPGVFFDSDKGKTHSSGK(12)	17	8.92e-13		√	√	√	18.788
84	GLNA(353)-RL2(108)	IPVVSSPKAR(8)-YILAPKGLK(6)	17	2.04e-12					n.a.
85	EFTU1(314)-G3P1(108),EFTU2(314)-G3P1(108)	FESEVYILSKDEGGR(10)-KHITAGAK(1)	17	2.09e-11					n.a.
86	GRCA(62)-PFLB(63)	EVPVEVKPEVR(7)-VMEGVKLENR(6)	17	1.81e-09		√			n.a.
87	RL3(38)-EFTU1(264),RL3(38)-EFTU2(264)	VTQVKDLANDGYR(5)-KLLDEGR(1)	17	4.26e-09		√	√		91.4785
88	GRCA(62)-PFLB(386)	EVPVEVKPEVR(7)-KFAAK(1)	17	5.29e-08		√			n.a.
89	RS10(82)-EFTU1(264),RS10(82)-EFTU2(264)	LVDIVEPTEKTVDALMR(10)-KLLDEGR(1)	17	4.7e-07			√		144.376
90	SUHB(251)-TOP3(89)	VVKAMLANMR(3)-QLNVIKR(6)	17	3.91e-06					n.a.
91	RL2(207)-RS9(100)	VLGKAGAAR(4)-KAGFVTR(1)	17	5.11e-06			√		73.7363
92	RL28(26)-RL2(207)	SHALNATKR(8)-VLGKAGAAR(4)	16	6.21e-11	√	√	√		51.5179
93	SYM(143)-RL7/12(71)	FVKGTCPK(3)-VAVIKAVR(5)	16	5.09e-10					n.a.
94	RL7/12(71)-RS10(1)	VAVIKAVR(5)-MQNQR(1)	16	1.75e-07					n.a.
95	RL11(113)-EFTU1(264),RL11(113)-EFTU2(264)	AQLQEIAQTKAADMTGADIEAMTR(10)-KLLDEGR(1)	16	1.86e-07		√	√		85.0911
96	MDH(99)-PUR9(422)	SDLFNVNAGIVKNLVQQVAK(12)-DALFCWKVAK(7)	16	0.000166					n.a.
97	RL9(112)-RS9(2)	DIADAVTAAGVEVAKSEVR(15)-AENQYYGTGR(1)	15	3.88e-13			√		138.931
98	RS10(30)-EFTU1(264),RS10(30)-EFTU2(264)	LIDQATAEIVETAKR(14)-KLLDEGR(1)	15	1.54e-10			√		150.498
99	EFTU1(57)-EFTS(214),EFTU2(57)-EFTS(214)	AFDQIDNAPEEKAR(12)-EIAEKMVEGR(5)	15	5.33e-10		√			n.a.
100	RS16(46)-RS2(28)	VGFFNPIASEKEEGTR(11)-MKPFIFGAR(2)	15	8.3e-10			√		80.9409
101	RL24(97)-RL18(17)	FFKSNSETIK(3)-KLQELGATR(1)	15	2.03e-09			√		133.687
102	RL18(17)-RL7/12(71)	KLQELGATR(1)-VAVIKAVR(5)	15	2.15e-09			√		120.477
103	RS6(93)-RLMD(59)	TKHAVTEASPMVK(2)-KQYAR(1)	15	2.52e-09					n.a.
104	DBHB(67)-RS15(73)	NPQTGKEITIAAAK(6)-KDVAR(1)	15	3.78e-05					n.a.
105	TPIS(28)-PFLB(135)	KELAGVAGCAVAIAPPEMYIDMAK(1)-ELDPMIKK(7)	15	0.00011		√			n.a.
106	EFTU1(264)-RS9(100),EFTU2(264)-RS9(100)	KLLDEGR(1)-KAGFVTR(1)	14	1.93e-08			√		153.213
107	RL2(183)-RS9(100)	KVEADCR(1)-KAGFVTR(1)	14	2.99e-08			√		38.2491
108	RL7/12(85)-G3P1(108)	EAKDLVESAPAALK(3)-KHITAGAK(1)	14	9.35e-07					n.a.
109	EFTU1(57)-SYW(55),EFTU2(57)-SYW(55)	AFDQIDNAPEEKAR(12)-QDAQKLR(5)	14	1.59e-06					n.a.
110	RL2(207)-RL1(54)	VLGKAGAAR(4)-KSDQNVR(1)	14	3.56e-06			√		83.6519
111	RL7/12(85)-EFTU1(264),RL7/12(85)-EFTU2(264)	EAKDLVESAPAALK(3)-KLLDEGR(1)	14	6.33e-06					n.a.
112	ODP2(313)-ODP1(368)	AEAPAAAPAAKAEGK(11)-GGHDPKK(6)	14	1.59e-05		√			n.a.
113	RL1(105)-DBHA(67)	AAGAELVGMEDLADQIKK(17)-NPQTGKEIK(6)	14	1.62e-05					n.a.
114	ALF(115)-EFTU1(264),ALF(115)-EFTU2(264)	KLLPWIDGLLDAGEK(1)-KLLDEGR(1)	13	2.94e-10					n.a.
115	RS16(76)-RL2(207)	VAALIKEVNK(6)-VLGKAGAAR(4)	13	6.22e-09			√		92.5539
116	RL11(87)-RL7/12(71)	AAGIKSGSGKPNK(5)-VAVIKAVR(5)	13	1.36e-07		√	√		35.9722
117	CH60(42)-RS9(2)	NVVLDKSFGAPTITK(6)-AENQYYGTGR(1)	13	1.5e-07					n.a.
118	EFTU1(57)-KDTA(33),EFTU2(57)-KDTA(33)	AFDQIDNAPEEKAR(12)-KRWGER(1)	13	2.32e-07		√			n.a.
119	RL7/12(71)-RS9(100)	VAVIKAVR(5)-KAGFVTR(1)	13	4.09e-06			√		165.774
120	CH60(272)-RS9(100)	GIVKVAAVK(4)-KAGFVTR(1)	13	6.27e-06					n.a.
121	RPOB(914)-RPOC(50)	ASDVKDSSLR(5)-TFKPER(3)	13	1.04e-05		√	√	√	21.4072
122	RS10(11)-RL2(207)	LKAFDHR(2)-VLGKAGAAR(4)	13	2.19e-05		√	√		81.1134
123	G3P1(108)-RL1(14)	KHITAGAK(1)-EKVDATK(2)	13	4.41e-05					n.a.
124	RS2(28)-RS1(247)	MKPFIFGAR(2)-VLKFDR(3)	13	5.36e-05		√			n.a.
125	RS1(247)-RS15(73)	VLKFDR(3)-KDVAR(1)	13	7.79e-05					n.a.
126	EFG(389)-IHFB(1)	AGDIAAAIGLKDVTTGDTLCDPDAPIILER(11)-MTKSELIER(1)	13	0.00084					n.a.
127	YIAV(288)-G3P1(124)	QNSLLRLAPGDDAEVVFNALPGKVFSGK(23)-VVMTGPSKDNTPMFVK(8)	13	0.00323					n.a.
128	YFCZ(50)-EFTU1(264),YFCZ(50)-EFTU2(264)	AEAEQTLAALTEKAR(13)-KLLDEGR(1)	12	8.43e-12					n.a.
129	RL7/12(71)-RL1(54)	VAVIKAVR(5)-KSDQNVR(1)	12	1.3e-09		√	√		171.983
130	RL17(121)-RL2(183)	SEKAEAAAE(3)-KVEADCR(1)	12	1.36e-09		√	√		117.03
131	EFTU1(314)-RL7/12(71),EFTU2(314)-RL7/12(71)	FESEVYILSKDEGGR(10)-VAVIKAVR(5)	12	2.76e-09					n.a.
132	RS16(76)-RL7/12(71)	VAALIKEVNK(6)-VAVIKAVR(5)	12	5.83e-09			√		95.479
133	RL9(112)-RL18(17)	DIADAVTAAGVEVAKSEVR(15)-KLQELGATR(1)	12	6.31e-09			√		119.954
134	EFTU1(314)-DBHA(67),EFTU2(314)-DBHA(67)	FESEVYILSKDEGGR(10)-NPQTGKEIK(6)	12	9.71e-08					n.a.
135	RL1(54)-G3P1(108)	KSDQNVR(1)-KHITAGAK(1)	12	5.46e-07					n.a.
136	RL6(29)-RL7/12(71)	GKNGELTR(2)-VAVIKAVR(5)	12	6.32e-07		√	√		52.266
137	RL7/12(71)-RL1(14)	VAVIKAVR(5)-EKVDATK(2)	12	1.8e-06		√	√		197.781
138	RL17(121)-RL1(54)	SEKAEAAAE(3)-KSDQNVR(1)	12	7.21e-06			√		152.004
139	RS12(108)-INTS(159)	GALDCSGVKDR(9)-ANKAR(3)	12	1.99e-05					n.a.
140	RL17(121)-RS13(103)	SEKAEAAAE(3)-TKTNAR(2)	12	2.79e-05		√	√		166.839
141	RS2(105)-RL17(121)	WLGGMLTNWKTVR(10)-SEKAEAAAE(3)	12	3.78e-05			√		176.425
142	EFTU1(264)-RS15(73),EFTU2(264)-RS15(73)	KLLDEGR(1)-KDVAR(1)	12	5.5e-05			√		104.684
143	EFTU1(57)-RS15(73),EFTU2(57)-RS15(73)	AFDQIDNAPEEKAR(12)-KDVAR(1)	12	8.74e-05			√		107.167
144	RPOB(890)-RPOC(50)	VTPKGETQLTPEEK(4)-TFKPER(3)	12	0.000184		√	√	√	16.8095
145	G3P1(108)-HNS(120)	KHITAGAK(1)-TPAVIKK(6)	11	1.38e-16					n.a.
146	GLMM(147)-YIFB(135)	EISCVDSAELGKASR(12)-KIIVAK(1)	11	4.04e-12					n.a.
147	CARB(649)-RS16(2)	GVIVQYGGQTPLKLAR(13)-VTIRLAR(1)	11	1.11e-10					n.a.
148	RL2(183)-RL7/12(71)	KVEADCR(1)-VAVIKAVR(5)	11	3.69e-08		√	√		173.556
149	RL9(112)-RS7(149)	DIADAVTAAGVEVAKSEVR(15)-MAEANKAFAHYR(6)	11	6.37e-08			√		69.6599
150	RS2(143)-RS12(2)	ELEKLENSLGGIK(4)-ATVNQLVR(1)	11	6.88e-08			√		50.1333
151	RL6(6)-RS8(2)	VAKAPVVVPAGVDVK(3)-SMQDPIADMLTR(1)	11	9.91e-08		√	√		151.264
152	RS10(11)-RL7/12(71)	LKAFDHR(2)-VAVIKAVR(5)	11	2.02e-07			√		141.733
153	ATPA(384)-CH60(226)	VGGAAQTKIMK(8)-KISNIR(1)	11	2.64e-07					n.a.
154	RL9(112)-PDXJ(235)	DIADAVTAAGVEVAKSEVR(15)-DAVAEMKR(7)	11	4.69e-07					n.a.
155	DBHB(67)-EFTS(214)	NPQTGKEITIAAAK(6)-EIAEKMVEGR(5)	11	5.33e-07					n.a.
156	TIG(287)-EFTU1(264),TIG(287)-EFTU2(264)	VKSQAIEGLVK(2)-KLLDEGR(1)	11	9.04e-07					n.a.
157	RL9(112)-RS15(73)	DIADAVTAAGVEVAKSEVR(15)-KDVAR(1)	11	3.77e-06			√		87.2557
158	YACL(14)-RPOC(50)	DITGVVKVR(7)-TFKPER(3)	11	7.89e-06		√			n.a.
159	RS9(2)-RL17(121)	AENQYYGTGR(1)-SEKAEAAAE(3)	11	9.83e-06		√	√		224.085
160	CH60(272)-ATPA(388)	GIVKVAAVK(4)-KLSGGIR(1)	11	2.76e-05					n.a.
161	RS2(131)-YIBG(150)	DLETQSQDGTFDKLTKK(16)-NKENP(2)	11	4e-05					n.a.
162	RL2(111)-YEDQ(551)	GLKAGDQIQSGVDAAIKPGNTLPMR(3)-LYLAKQAGR(5)	11	6.13e-05					n.a.
163	RL18(17)-RS15(73)	KLQELGATR(1)-KDVAR(1)	11	0.000131			√		153.146
164	ODP2(410)-EUTE(166)	IQKISGANLSR(3)-KVSQR(1)	11	0.000164					n.a.
165	EFTU1(314)-RL7/12(85),EFTU2(314)-RL7/12(85)	FESEVYILSKDEGGR(10)-EAKDLVESAPAALK(3)	10	2.23e-11					n.a.
166	RL9(57)-EFTU1(264),RL9(57)-EFTU2(264)	RAELEAKLAEVLAAANAR(7)-KLLDEGR(1)	10	2.47e-11			√		185.579
167	RL29(44)-FKBA(110)	MQAASGQLQQSHLLKQVR(15)-VKSSAQAK(2)	10	6.04e-11					n.a.
168	RL6(6)-EFTU1(264),RL6(6)-EFTU2(264)	VAKAPVVVPAGVDVK(3)-KLLDEGR(1)	10	2.33e-08		√	√		94.5806
169	EFTU1(314)-RL6(6),EFTU2(314)-RL6(6)	FESEVYILSKDEGGR(10)-VAKAPVVVPAGVDVK(3)	10	2.72e-08		√	√		66.4617
170	RL18(17)-RL2(207)	KLQELGATR(1)-VLGKAGAAR(4)	10	4.77e-08			√		115.285
171	DNAK(55)-SQUT(121)	TTPSIIAYTQDGETLVGQPAKR(21)-QDGGKALK(5)	10	3.3e-07					n.a.
172	HFLC(289)-HFLK(310)	LFADAFSKDPDFYAFIR(8)-FAKLLPEYK(3)	10	7.39e-07		√			n.a.
173	RL2(207)-RL21(85)	VLGKAGAAR(4)-KQQGHR(1)	10	7.82e-07			√		87.481
174	RS9(2)-RL2(207)	AENQYYGTGR(1)-VLGKAGAAR(4)	10	1.01e-06			√		144.494
175	DBHB(67)-RL7/12(71)	NPQTGKEITIAAAK(6)-VAVIKAVR(5)	10	1.21e-06					n.a.
176	ODO2(2)-DLDH(278)	SSVDILVPDLPESVADATVATWHK(1)-VPNGKNLDAGK(5)	10	2.79e-06		√			n.a.
177	G3P1(124)-EFTU1(264),G3P1(124)-EFTU2(264)	VVMTGPSKDNTPMFVK(8)-KLLDEGR(1)	10	2.86e-06					n.a.
178	RL17(99)-RL2(183)	ILKCGFR(3)-KVEADCR(1)	10	3.73e-06		√	√		112.148
179	RL6(86)-RL7/12(71)	KLQLVGVGYR(1)-VAVIKAVR(5)	10	3.77e-06		√	√		41.6565
180	DNAK(183)-YNCG(200)	IINEPTAAALAYGLDKGTGNR(16)-LQEVLKR(6)	10	4.23e-06					n.a.
181	RL19(87)-CBRA(125)	VFQTHSPVVDSISVKR(15)-KIWREDDK(1)	10	4.91e-06					n.a.
182	CH60(117)-AROC(142)	AVAAGMNPMDLKR(12)-VAAGAIAKK(8)	10	5.25e-06					n.a.
183	RL5(120)-RS10(11)	GLSAKSFDGR(5)-LKAFDHR(2)	10	7.57e-06			√		86.3846
184	RL24(97)-RS1(247)	FFKSNSETIK(3)-VLKFDR(3)	10	1.33e-05					n.a.
185	RL17(99)-RS9(100)	ILKCGFR(3)-KAGFVTR(1)	10	1.58e-05		√	√		99.5458
186	YBIO(706)-YBAE(1)	KHFDLAGVR(1)-MRLLNR(1)	10	3.82e-05					n.a.
187	G3P1(108)-RS15(73)	KHITAGAK(1)-KDVAR(1)	10	5.88e-05					n.a.
188	RL1(14)-RS15(73)	EKVDATK(2)-KDVAR(1)	10	6.38e-05			√		128.376
189	RL2(207)-RS10(1)	VLGKAGAAR(4)-MQNQR(1)	10	7.69e-05		√	√		148.077
190	G3P1(184)-SGCA(13)	VINDNFGIIEGLMTTVHATTATQKTVDGPSHK(24)-KATDWR(1)	10	8.58e-05					n.a.
191	PRMB(124)-RS8(89)	SPIGELINNKFAGLISK(10)-KDELPK(1)	10	0.000104					n.a.
192	EFG(389)-EUTD(1)	EVRAGDIAAAIGLKDVTTGDTLCDPDAPIILER(14)-MIIER(1)	10	0.000109					n.a.
193	RL17(99)-RS15(73)	ILKCGFR(3)-KDVAR(1)	10	0.000139			√		105.32
194	RL31(39)-RL5(3)	STVGHDLNLDVCSKCHPFFTGK(14)-AKLHDYYKDEVVK(2)	9	5.01e-23			√	√	15.6091
195	RL9(112)-DBHB(67)	DIADAVTAAGVEVAKSEVR(15)-NPQTGKEITIAAAK(6)	9	2.46e-10					n.a.
196	RL17(121)-RL21(85)	SEKAEAAAE(3)-KQQGHR(1)	9	9.5e-10			√		85.985
197	EFTU1(57)-RS8(2),EFTU2(57)-RS8(2)	AFDQIDNAPEEKAR(12)-SMQDPIADMLTR(1)	9	2.37e-09			√		101.752
198	RL1(105)-EFTU1(264),RL1(105)-EFTU2(264)	AAGAELVGMEDLADQIKK(17)-KLLDEGR(1)	9	2.69e-09			√		189.141
199	RL9(57)-G3P1(108)	RAELEAKLAEVLAAANAR(7)-KHITAGAK(1)	9	1.17e-08					n.a.
200	RL1(141)-RL19(37)	GLMPNPKVGTVTPNVAEAVK(7)-VWVVEGSKK(8)	9	2.85e-08			√		162.839
201	RL7/12(71)-RL2(68)	VAVIKAVR(5)-IVDFKR(5)	9	6.09e-07		√	√		178.042
202	RL24(97)-RL17(99)	FFKSNSETIK(3)-ILKCGFR(3)	9	9.83e-07			√		93.1595
203	RS9(2)-RS7(11)	AENQYYGTGR(1)-KILPDPK(1)	9	1.38e-06			√		31.9654
204	DBHB(67)-RL1(14)	NPQTGKEITIAAAK(6)-EKVDATK(2)	9	1.73e-06					n.a.
205	RL24(97)-RS9(100)	FFKSNSETIK(3)-KAGFVTR(1)	9	4.88e-06			√		149.626
206	RL9(89)-EFTU1(264),RL9(89)-EFTU2(264)	AGDEGKLFGSIGTR(6)-KLLDEGR(1)	9	7.05e-06			√		144.902
207	CPXR(188)-IDNR(1)	EHLSQEVLGKR(10)-MRNHR(1)	9	1.08e-05					n.a.
208	RL2(183)-RS13(103)	KVEADCR(1)-TKTNAR(2)	9	5.78e-05			√		82.1114
209	RL7/12(71)-RS2(2)	VAVIKAVR(5)-ATVSMR(1)	9	6.78e-05		√			n.a.
210	RL16(62)-EFTU1(264),RL16(62)-EFTU2(264)	QGKIWIR(3)-KLLDEGR(1)	9	8.14e-05			√		97.5752
211	RS8(2)-RS15(73)	SMQDPIADMLTR(1)-KDVAR(1)	9	0.000145			√	√	20.2773
212	RL15(84)-RS2(2)	LSDLAKVEGGVVDLNTLK(6)-ATVSMR(1)	9	0.000159			√		209.399
213	PPDB(44)-RAIA(1)	KLALEDEIWLR(1)-MTMNITSK(1)	9	0.00148					n.a.
214	RL5(2)-RL31(47)	AKLHDYYKDEVVK(1)-CHPFFTGKQR(8)	8	7.27e-17			√		29.7322
215	EFG(507)-EFTU1(264),EFG(507)-EFTU2(264)	HAKQSGGR(3)-KLLDEGR(1)	8	3.63e-10		√			n.a.
216	EFTU1(300)-RL7/12(71),EFTU2(300)-RL7/12(71)	PGTIKPHTK(5)-VAVIKAVR(5)	8	7.31e-10					n.a.
217	RL9(112)-RL6(6)	DIADAVTAAGVEVAKSEVR(15)-VAKAPVVVPAGVDVK(3)	8	1.89e-09			√		100.851
218	G3P1(124)-HPF(26)	VVMTGPSKDNTPMFVK(8)-FAKLEQYFDR(3)	8	2.63e-09					n.a.
219	RHO(181)-EFTU1(264),RHO(181)-EFTU2(264)	GLIVAPPKAGK(8)-KLLDEGR(1)	8	2.69e-09		√			n.a.
220	RL2(108)-EFTU1(264),RL2(108)-EFTU2(264)	YILAPKGLK(6)-KLLDEGR(1)	8	2.2e-08			√		121.79
221	EFTU1(264)-SYT(241),EFTU2(264)-SYT(241)	KLLDEGR(1)-LEEAAKR(6)	8	2.74e-08					n.a.
222	DLDH(106)-ODP1(508)	VINQLTGGLAGMAKGR(14)-ALNVMLKNK(7)	8	9.34e-08		√			n.a.
223	SYY(85)-YFDC(289)	FQQAGHKPVALVGGATGLIGDPSFKAAER(25)-RKAEAR(2)	8	1.26e-07					n.a.
224	RECT(39)-FIS(25)	NSDVISFINQPSMKEQLAAALPR(14)-VNSDVLTVSTVNSQDQVTQKPLR(20)	8	1.34e-07					n.a.
225	RL25(73)-FKBA(110)	VKAQDVQR(2)-VKSSAQAK(2)	8	5.98e-07					n.a.
226	RL2(183)-RL1(14)	KVEADCR(1)-EKVDATK(2)	8	9.4e-07			√		52.4698
227	G3P1(108)-ACP(2)	KHITAGAK(1)-STIEER(1)	8	1.53e-06					n.a.
228	RS9(2)-RS4(77)	AENQYYGTGR(1)-NYYKEAAR(4)	8	1.66e-06			√		123.466
229	RS10(11)-RS14(76)	LKAFDHR(2)-KFGLSR(1)	8	2.82e-06			√	√	15.6218
230	RL1(54)-RS15(73)	KSDQNVR(1)-KDVAR(1)	8	4.85e-06			√		128.097
231	RS19(21)-CEDA(2)	VEKAVESGDK(3)-KKPLR(1)	8	9.57e-06	√				n.a.
232	RL18(17)-RL17(99)	KLQELGATR(1)-ILKCGFR(3)	8	1.24e-05			√		144.698
233	RS10(59)-PRET(325)	FTVLISPHVNKDAR(11)-VTFKHVR(4)	8	1.5e-05					n.a.
234	RL17(99)-EFTU1(264),RL17(99)-EFTU2(264)	ILKCGFR(3)-KLLDEGR(1)	8	1.69e-05			√		108.396
235	RL1(105)-RL7/12(71)	AAGAELVGMEDLADQIKK(17)-VAVIKAVR(5)	8	2.16e-05		√	√		171.261
236	ENO(120)-ASTB(48)	FGANAILAVSLANAKAAAAAK(15)-QGLLKMK(5)	8	2.96e-05					n.a.
237	ODP2(442)-DUT(3)	KQQNEEAAK(1)-KIDVK(1)	8	5.14e-05					n.a.
238	RL2(125)-YEDQ(551)	GLKAGDQIQSGVDAAIKPGNTLPMR(17)-LYLAKQAGR(5)	8	6.3e-05					n.a.
239	RL6(6)-RS15(73)	VAKAPVVVPAGVDVK(3)-KDVAR(1)	8	7.55e-05			√		130.68
240	LRP(129)-BAER(122)	KLLGETLLR(1)-VKTILR(2)	8	7.91e-05					n.a.
241	RL7/12(85)-RL11(82)	EAKDLVESAPAALK(3)-KAAGIK(1)	8	0.000225		√	√		31.7028
242	HTPG(271)-YHJJ(5)	VEGKQEYTSLLYIPSQAPWDMWNR(4)-QGTKIR(4)	8	0.000307					n.a.
243	TIG(48)-YKFC(176)	GKVPMNIVAQR(2)-LLMKAVR(4)	8	0.000828					n.a.
244	RS14(19)-PFLA(2)	VALADKYFAK(6)-SVIGR(1)	8	0.00113					n.a.
245	RS4(83)-RS15(73)	LKGNTGENLLALLEGR(2)-KDVAR(1)	8	0.00117			√		63.0827
246	RL7/12(85)-DBHB(67)	EAKDLVESAPAALK(3)-NPQTGKEITIAAAK(6)	7	3.34e-10					n.a.
247	RNPA(91)-YACL(1)	KGVADLDNR(1)-MDYEFLR(1)	7	4.35e-10					n.a.
248	RPOC(1192)-RPOB(191)	LVITPVDGSDPYEEMIPKWR(18)-GSWLDFEFDPKDNLFVR(11)	7	4.39e-09		√	√	√	21.4717
249	RS10(59)-FKBA(110)	FTVLISPHVNKDAR(11)-VKSSAQAK(2)	7	8.08e-09					n.a.
250	RL1(105)-RS2(2)	AAGAELVGMEDLADQIKK(17)-ATVSMR(1)	7	8.5e-09		√	√		136.876
251	RS10(59)-EFTU1(264),RS10(59)-EFTU2(264)	FTVLISPHVNKDAR(11)-KLLDEGR(1)	7	2.03e-08			√		109.184
252	RL2(147)-NARJ(37)	NIPVGSTVHNVEMKPGK(14)-NLPKEDAHALGIFLR(4)	7	2.3e-08					n.a.
253	RS10(11)-RS1(450)	LKAFDHR(2)-KGAIVTGK(1)	7	3.97e-08		√			n.a.
254	EFTU1(314)-RL29(54),EFTU2(314)-RL29(54)	FESEVYILSKDEGGR(10)-VKTLLNEK(2)	7	5.41e-08			√		181.417
255	PFLB(107)-XDHD(430)	IVGLQTEAPLKR(11)-LVGMKQHK(5)	7	1.81e-07					n.a.
256	DAPD(263)-EFTU1(264),DAPD(263)-EFTU2(264)	GKVGINELLR(2)-KLLDEGR(1)	7	2.1e-07					n.a.
257	DBHA(22)-EFTU1(264),DBHA(22)-EFTU2(264)	TQAKAALESTLAAITESLK(4)-KLLDEGR(1)	7	4.53e-07					n.a.
258	RS9(2)-KAD(50)	AENQYYGTGR(1)-QAKDIMDAGK(3)	7	1.03e-06					n.a.
259	RS7(149)-RL17(99)	MAEANKAFAHYR(6)-ILKCGFR(3)	7	1.98e-06			√		139.705
260	IMDH(156)-CADB(426)	FVTDLNQPVSVYMTPKER(16)-KMHER(1)	7	6.15e-06					n.a.
261	STPA(117)-HNS(57)	TPKPIAQALAEGK(3)-KLQQYR(1)	7	8.68e-06		√			n.a.
262	RS7(11)-RS9(115)	KILPDPK(1)-KVGLR(1)	7	9.04e-06			√	√	20.2527
263	TIG(327)-RS8(2)	FGGNEKQALELPR(6)-SMQDPIADMLTR(1)	7	1.79e-05					n.a.
264	RL17(121)-RS9(13)	SEKAEAAAE(3)-KSSAAR(1)	7	2.62e-05		√	√		199.713
265	RL17(99)-RS9(13)	ILKCGFR(3)-KSSAAR(1)	7	4.34e-05		√	√		106.343
266	RS5(156)-GLTL(74)	ATIDGLENMNSPEMVAAKRGK(18)-TDLAKLR(5)	7	7.78e-05					n.a.
267	NUOF(366)-CLPB(558),NUOF(366)-SUFE(9),NUOF(366)-YPHG(628),NUOF(366)-QUEF(214)	DGLPWSVKILR(8)-EKLLR(2)	7	0.000143					n.a.
268	RL7/12(71)-RS16(1)	VAVIKAVR(5)-MVTIR(1)	7	0.000176			√		96.2921
269	RL7/12(85)-RL6(29)	EAKDLVESAPAALK(3)-GKNGELTR(2)	7	0.000204		√	√		48.2599
270	YBBO(207)-PAAA(2)	FTDNVNQTQSDKPVENPGIAAR(12)-TQEER(1)	7	0.000303					n.a.
271	RL5(120)-YGHO(186)	GLSAKSFDGR(5)-KVTIR(1)	7	0.000389					n.a.
272	DXR(366)-IDH(235)	FTDIAALNLSVLEKMDMR(14)-GNIMKFTEGAFK(5)	7	0.000958					n.a.
273	ACCA(1)-HICB(104)	MSLNFLDFEQPIAELEAKIDSLTAVSR(1)-PKQEITR(2)	7	0.0013					n.a.
274	YEEA(176)-PFLB(162)	AFIHWRIQLAKSLTEYNR(11)-CRKSGVLTGLPDAYGR(3)	7	0.00255					n.a.
275	IMDH(212)-RL23(44)	KPNACKDEQGR(6)-AEIKAAVQK(4)	6	3.11e-12					n.a.
276	RPOB(161)-RPOC(1132)	SPGVFFDSDKGKTHSSGK(10)-IPQESGGTKDITGGLPR(9)	6	1.33e-11		√	√	√	19.9617
277	RL9(42)-RL28(44)	KNIEFFEAR(1)-FWVESEKR(7)	6	1.7e-10	√	√	√	√	16.283
278	RAIA(80)-G3P1(108)	HEDMYTAINELINKLER(14)-KHITAGAK(1)	6	5.13e-10					n.a.
279	IF3(177)-RS10(1)	QMIMVLAPKK(9)-MQNQR(1)	6	1.19e-08		√			n.a.
280	DBHA(67)-G3P1(108)	NPQTGKEIK(6)-KHITAGAK(1)	6	2.47e-08					n.a.
281	ODP2(442)-DLDH(256)	KQQNEEAAK(1)-KAPAEPQR(1)	6	2.88e-08		√			n.a.
282	SYP(547)-GARR(17)	NLDNDDIEYKYR(10)-PMSKNLLK(4)	6	3.67e-08					n.a.
283	DBHB(67)-RL18(17)	NPQTGKEITIAAAK(6)-KLQELGATR(1)	6	4.26e-08					n.a.
284	RL13(68)-RS1(247)	VAVTGNKR(7)-VLKFDR(3)	6	9.42e-08					n.a.
285	RS7(149)-RS1(247)	MAEANKAFAHYR(6)-VLKFDR(3)	6	1.33e-07					n.a.
286	RS5(126)-EFTU1(264),RS5(126)-EFTU2(264)	AVLEVAGVHNVLAKAYGSTNPINVVR(14)-KLLDEGR(1)	6	1.69e-07		√	√		77.697
287	MALQ(176)-YAEH(99)	AMLVDVAKR(8)-KILDDLR(1)	6	3.66e-07					n.a.
288	RS1(464)-DBHB(67)	VTAVDAKGATVELADGVEGYLR(7)-NPQTGKEITIAAAK(6)	6	3.98e-07					n.a.
289	RS7(114)-EFTU1(264),RS7(114)-EFTU2(264)	GDKSMALR(3)-KLLDEGR(1)	6	1.11e-06		√	√		145.603
290	HNS(87)-MMUP(15)	EMLIADGIDPNELLNSLAAVKSGTKAK(25)-TMKTR(3)	6	1.86e-06					n.a.
291	DBHB(67)-RL17(121)	NPQTGKEITIAAAK(6)-SEKAEAAAE(3)	6	8.14e-06					n.a.
292	SYP(547)-AIS(44)	NLDNDDIEYKYR(10)-IDNKTLAR(4)	6	1.09e-05					n.a.
293	RL1(54)-RS10(1)	KSDQNVR(1)-MQNQR(1)	6	1.21e-05		√	√		107.404
294	RL17(99)-RS10(11)	ILKCGFR(3)-LKAFDHR(2)	6	1.25e-05			√		94.4608
295	RL6(6)-RS9(100)	VAKAPVVVPAGVDVK(3)-KAGFVTR(1)	6	1.37e-05		√	√		157.797
296	RL1(141)-RL7/12(71)	GLMPNPKVGTVTPNVAEAVK(7)-VAVIKAVR(5)	6	1.52e-05		√	√		180.082
297	FPG(255)-RLUD(54)	VCGTPIVATKHAQR(10)-VCDKPK(4)	6	2.25e-05					n.a.
298	PGK(27)-DBHA(67)	ADLNVPVKDGK(8)-NPQTGKEIK(6)	6	2.55e-05					n.a.
299	RS4(77)-RL17(121)	NYYKEAAR(4)-SEKAEAAAE(3)	6	2.82e-05		√	√		144.221
300	DBHA(67)-RS1(247)	NPQTGKEIK(6)-VLKFDR(3)	6	3.91e-05					n.a.
301	RL28(10)-RL17(99)	VCQVTGKR(7)-ILKCGFR(3)	6	5.33e-05			√		108.456
302	RL16(127)-PTFX1(802)	LPIKTTFVTK(4)-KLVNK(1)	6	7.81e-05					n.a.
303	ODO2(156)-GLPX2(147)	APAKESAPAAAAPAAQPALAAR(4)-NVAKALGK(4)	6	8.06e-05					n.a.
304	RS14(76)-RS10(1)	KFGLSR(1)-MQNQR(1)	6	8.95e-05			√		33.3592
305	EFTS(214)-EFTU1(264),EFTS(214)-EFTU2(264)	EIAEKMVEGR(5)-KLLDEGR(1)	6	9e-05		√	√		62.2156
306	RL17(121)-RS15(73)	SEKAEAAAE(3)-KDVAR(1)	6	9.05e-05			√		124.105
307	RL2(71)-RL17(121)	NKDGIPAVVER(2)-SEKAEAAAE(3)	6	0.000107		√	√		109.961
308	SYM(403)-RLUA(94)	NAGFINKR(7)-KQYVAR(1)	6	0.000124					n.a.
309	GLND(575)-HNS(57)	DIQDPEVIKQFAEEVQTENRLR(9)-KLQQYR(1)	6	0.000157					n.a.
310	RS2(28)-RL1(54)	MKPFIFGAR(2)-KSDQNVR(1)	6	0.000234		√	√		120.406
311	RL24(97)-RS15(73)	FFKSNSETIK(3)-KDVAR(1)	6	0.000263			√		139.356
312	PARE(552)-ASNB(19)	EGVLEQLKR(8)-TDAVELRKK(8)	6	0.000268					n.a.
313	RPOC(50)-PANC(22)	TFKPER(3)-MEGKR(4)	6	0.00086					n.a.
314	TORZ(693)-YDJH(304)	KYAIADREPITIHTEDAAR(1)-KLVEQLLEEYEG(1)	6	0.00257					n.a.
315	DLDH(255)-LIGT(1)	EDGIYVTMEGKK(11)-MSEPQR(1)	6	0.00386					n.a.
316	RL9(112)-RS8(2)	DIADAVTAAGVEVAKSEVR(15)-SMQDPIADMLTR(1)	5	9.1e-13			√		90.2401
317	RL29(44)-EFTU1(264),RL29(44)-EFTU2(264)	MQAASGQLQQSHLLKQVR(15)-KLLDEGR(1)	5	1.65e-12			√		165.884
318	GRCA(62)-PFLB(591)	EVPVEVKPEVR(7)-IQKLHTYR(3)	5	2.84e-12	√	√			n.a.
319	RL2(183)-RL1(54)	KVEADCR(1)-KSDQNVR(1)	5	1.07e-11			√		59.2444
320	ODP2(410)-DLDH(403)	IQKISGANLSR(3)-LIFDKESHR(5)	5	8.61e-11		√			n.a.
321	RL9(112)-RS2(28)	DIADAVTAAGVEVAKSEVR(15)-MKPFIFGAR(2)	5	2.2e-10			√		98.4591
322	EFTU1(314)-RS8(2),EFTU2(314)-RS8(2)	FESEVYILSKDEGGR(10)-SMQDPIADMLTR(1)	5	3.9e-10			√		119.705
323	SUCD(241)-SUCC(1)	EHVTKPVVGYIAGVTAPKGK(18)-MNLHEYQAK(1)	5	1.47e-08	√	√	√	√	15.3232
324	RL2(108)-RL7/12(71)	YILAPKGLK(6)-VAVIKAVR(5)	5	6.3e-08		√	√		165.22
325	DNAK(637)-GRPE(66)	DDDVVDAEFEEVKDKK(15)-VKAEMENLR(2)	5	1.59e-07		√			n.a.
326	UPP(26)-RL1(54)	EQDISTKR(7)-KSDQNVR(1)	5	1.75e-07					n.a.
327	RNR(719)-RS7(11)	KIDFSLISSER(1)-KILPDPK(1)	5	2.25e-07		√			n.a.
328	GUAA(307)-YDIF(289)	FLSALAGENDPEAKR(14)-KLVAR(1)	5	2.55e-07					n.a.
329	DNAK(55)-HIGB(10)	TTPSIIAYTQDGETLVGQPAKR(21)-ALKDAAEK(3)	5	2.82e-07					n.a.
330	RL4(166)-RL2(207)	NLHKVDVR(4)-VLGKAGAAR(4)	5	3.09e-07		√	√		109.125
331	RL17(121)-RS3(108)	SEKAEAAAE(3)-KPELDAK(1)	5	3.18e-07			√		182.158
332	ACCC(353)-EFTU1(314),ACCC(353)-EFTU2(314)	INAEDPNTFLPSPGKITR(15)-FESEVYILSKDEGGR(10)	5	3.56e-07					n.a.
333	RS16(46)-EFTU1(264),RS16(46)-EFTU2(264)	VGFFNPIASEKEEGTR(11)-KLLDEGR(1)	5	4.79e-07			√		57.5848
334	RL2(71)-RS9(2)	NKDGIPAVVER(2)-AENQYYGTGR(1)	5	5.35e-07			√		144.13
335	RS4(83)-RS9(100)	LKGNTGENLLALLEGR(2)-KAGFVTR(1)	5	5.65e-07			√		106.402
336	TIG(327)-EFTU1(264),TIG(327)-EFTU2(264)	FGGNEKQALELPR(6)-KLLDEGR(1)	5	8.19e-07					n.a.
337	RL7/12(71)-YADL(94)	VAVIKAVR(5)-KAQIK(1)	5	1.26e-06					n.a.
338	RL29(54)-EFTU1(264),RL29(54)-EFTU2(264)	VKTLLNEK(2)-KLLDEGR(1)	5	2.38e-06			√		172.213
339	RL7/12(85)-RL1(141)	GATGLGLKEAKDLVESAPAALK(11)-GLMPNPKVGTVTPNVAEAVK(7)	5	2.47e-06		√	√		172.913
340	RS4(77)-RL1(54)	NYYKEAAR(4)-KSDQNVR(1)	5	2.66e-06		√	√		139.91
341	HNS(57)-G3P1(108)	KLQQYR(1)-KHITAGAK(1)	5	3.09e-06					n.a.
342	RL5(120)-RL7/12(71)	GLSAKSFDGR(5)-VAVIKAVR(5)	5	5.14e-06		√	√		99.5503
343	CH10(34)-PLSX(261)	SAGGIVLTGSAAAKSTR(14)-SQGEGKKR(7)	5	7.03e-06					n.a.
344	RL18(17)-RL1(14)	KLQELGATR(1)-EKVDATK(2)	5	7.28e-06		√	√		94.4919
345	RS8(2)-G3P1(108)	SMQDPIADMLTR(1)-KHITAGAK(1)	5	9.63e-06					n.a.
346	RL9(112)-RLUC(44)	DIADAVTAAGVEVAKSEVR(15)-KGEVR(1)	5	9.98e-06		√			n.a.
347	IMDH(87)-RL23(40)	VKKHESGVVTDPQTVLPTTTLR(2)-DATKAEIK(4)	5	1.09e-05					n.a.
348	PHSM(637)-PHSG(556)	LIPAADISEQISTAGKEASGTGNMK(16)-IHEYKR(5)	5	1.37e-05		√			n.a.
349	RS13(78)-EFTU1(264),RS13(78)-EFTU2(264)	EISMSIKR(7)-KLLDEGR(1)	5	2.24e-05			√		120.851
350	RL9(89)-RL2(183)	AGDEGKLFGSIGTR(6)-KVEADCR(1)	5	2.93e-05	√	√	√	√	15.9969
351	OMPA(315)-LPP(75)	GMGESNPVTGNTCDNVKQR(17)-LDNMATKYR(7)	5	2.94e-05					n.a.
352	RL7/12(71)-RS13(103)	VAVIKAVR(5)-TKTNAR(2)	5	2.98e-05			√		79.053
353	RL9(112)-YCED(18)	DIADAVTAAGVEVAKSEVR(15)-TAQKR(4)	5	3.2e-05					n.a.
354	PFLB(57)-TDCE(111)	NYTPYEGDESFLAGATEATTTLWDKVMEGVK(25)-IVGLQTDAPLKR(11)	5	3.35e-05					n.a.
355	SYV(930)-DBHA(67)	EKLEGYAEAK(2)-NPQTGKEIK(6)	5	3.64e-05					n.a.
356	GLNA(353)-RS10(11)	IPVVSSPKAR(8)-LKAFDHR(2)	5	3.73e-05					n.a.
357	GLPT(224)-INTZ(1)	DTPQSCGLPPIEEYKNDYPDDYNEK(15)-MSKTPLTAK(1)	5	3.92e-05					n.a.
358	RL2(265)-EFTU1(264),RL2(265)-EFTU2(264)	TDKFIVR(3)-KLLDEGR(1)	5	3.93e-05			√		138.892
359	RL16(62)-RL2(207)	QGKIWIR(3)-VLGKAGAAR(4)	5	4.14e-05		√	√		103.158
360	IF3(164)-UDP(235)	DDLQELAVVESFPTKIEGRQMIMVLAPK(15)-TQQEIPNAETMKQTESHAVK(12)	5	4.78e-05					n.a.
361	RL2(207)-RS18(50)	VLGKAGAAR(4)-AKYQR(2)	5	5.26e-05			√		51.2834
362	RECE(749)-RL6(6)	CRPDKIIPEFHWIMDVK(5)-VAKAPVVVPAGVDVK(3)	5	6.72e-05					n.a.
363	DNAK(55)-SMTA(83)	TTPSIIAYTQDGETLVGQPAKR(21)-AKQAAEAK(2)	5	7.97e-05					n.a.
364	RL19(63)-RL17(121)	KISNGEGVER(1)-SEKAEAAAE(3)	5	9.51e-05			√		52.5952
365	PFLB(195)-HSLU(2)	VALYGIDYLMKDK(11)-SEMTPR(1)	5	9.61e-05					n.a.
366	EFTU1(57)-ARAG(191),EFTU2(57)-ARAG(191)	AFDQIDNAPEEKAR(12)-ELRKEGR(4)	5	0.000108					n.a.
367	RL4(74)-RL2(207)	SGSIKSPIWR(5)-VLGKAGAAR(4)	5	0.000122		√	√		60.2799
368	CHER(46)-RHO(181)	AGIVLADHKR(9)-GLIVAPPKAGK(8)	5	0.000132					n.a.
369	RNB(68)-BTUE(183),RNB(68)-GATD(202),RNB(68)-HYFA(41),RNB(68)-MANB(60),RNB(68)-YFGI(119)	IIAVIHSEKER(9)-LALAK(5)	5	0.000155					n.a.
370	RL2(183)-RL13(68)	KVEADCR(1)-VAVTGNKR(7)	5	0.000159			√		123.228
371	ISPH(306)-ALAA(341),ISPH(306)-YADV(89)	EENIVFEVPKELR(10)-IDAKR(4)	5	0.000175					n.a.
372	RL19(63)-EFTU1(264),RL19(63)-EFTU2(264)	KISNGEGVER(1)-KLLDEGR(1)	5	0.000178			√		50.7481
373	RL2(68)-RS9(100)	IVDFKR(5)-KAGFVTR(1)	5	0.000191			√		41.5142
374	YQIH(136)-ACRA(3)	NVMQVTMQHALKLFWR(12)-MNKNR(3)	5	0.000214					n.a.
375	UPP(116)-HTRC(7)	NEETLEPVPYFQKLVSNIDER(13)-QEVEKWR(5)	5	0.000223					n.a.
376	DBHA(67)-LPLA(172),DBHA(67)-YAIW(281)	NPQTGKEIK(6)-KLAAK(1)	5	0.00023					n.a.
377	RL9(112)-DBHA(67)	DIADAVTAAGVEVAKSEVR(15)-NPQTGKEIK(6)	5	0.000274					n.a.
378	CARB(379)-YMFS(91)	FAGANDRLTTQMKSVGEVMAIGR(13)-QWQGKAALGR(5)	5	0.000292					n.a.
379	ELFC(753)-RL14(54)	IALDAASLKR(9)-KGDVLK(1)	5	0.000326					n.a.
380	RS9(2)-RS15(73)	AENQYYGTGR(1)-KDVAR(1)	5	0.000331			√		140.319
381	RL2(207)-RL15(129)	VLGKAGAAR(4)-VTKGAR(3)	5	0.000389		√	√		113.037
382	RS7(114)-RS1(247)	GDKSMALR(3)-VLKFDR(3)	5	0.000436					n.a.
383	RL9(112)-DMSB(137)	DIADAVTAAGVEVAKSEVR(15)-VAEGKK(5)	5	0.000544					n.a.
384	RL10(105)-RL7/12(71)	ANAKFEVK(4)-VAVIKAVR(5)	5	0.000562		√	√		52.9564
385	RL28(62)-FADJ(50)	KGIDTVLAELR(1)-ENKELR(3)	5	0.000624					n.a.
386	PMBA(272)-HIPB(34)	KSTFLLDSLGK(1)-KIGIK(1)	5	0.000927					n.a.
387	RL28(44)-RL7/12(71)	FWVESEKR(7)-VAVIKAVR(5)	4	8.38e-11			√		203.248
388	RS1(229)-DBHB(67)	VKHPSEIVNVGDEITVK(2)-NPQTGKEITIAAAK(6)	4	1.58e-09					n.a.
389	RL11(113)-DBHB(67)	AQLQEIAQTKAADMTGADIEAMTR(10)-NPQTGKEITIAAAK(6)	4	4.64e-09					n.a.
390	EFTU1(57)-CBRA(125),EFTU2(57)-CBRA(125)	AFDQIDNAPEEKAR(12)-KIWREDDK(1)	4	1.35e-08					n.a.
391	RS16(76)-G3P1(108)	VAALIKEVNK(6)-KHITAGAK(1)	4	2.34e-08					n.a.
392	EFTU1(57)-RL1(14),EFTU2(57)-RL1(14)	AFDQIDNAPEEKAR(12)-EKVDATK(2)	4	4.43e-08			√		183.902
393	IF1(64)-FKBA(69)	VTVELTPYDLSKGR(12)-EQEKLGIK(4)	4	7.37e-08					n.a.
394	RS20(16)-RL21(85)	AIQSEKAR(6)-KQQGHR(1)	4	9.05e-08			√		138.365
395	RS5(52)-EFTU1(264),RS5(52)-EFTU2(264)	VGFGYGKAR(7)-KLLDEGR(1)	4	1.93e-07		√	√		94.3897
396	RS1(14)-RS2(11)	MTESFAQLFEESLKEIETRPGSIVR(14)-DMLKAGVHFGHQTR(4)	4	1.93e-07		√			n.a.
397	DBHA(67)-RS4(77)	NPQTGKEIK(6)-NYYKEAAR(4)	4	2.51e-07					n.a.
398	RS10(30)-CBRC(2)	LIDQATAEIVETAKR(14)-TQNIR(1)	4	3.35e-07					n.a.
399	RL7/12(85)-RL6(86)	EAKDLVESAPAALK(3)-KLQLVGVGYR(1)	4	3.51e-07		√	√		39.5955
400	CH60(122)-EFTU1(264),CH60(122)-EFTU2(264)	GIDKAVTAAVEELK(4)-KLLDEGR(1)	4	6.31e-07		√			n.a.
401	ATPA(419)-EFTU1(264),ATPA(419)-EFTU2(264)	KQLDHGQK(1)-KLLDEGR(1)	4	7.34e-07					n.a.
402	DBHB(67)-RS3(108)	NPQTGKEITIAAAK(6)-KPELDAK(1)	4	7.68e-07					n.a.
403	YCDY(35)-QUEG(1)	EGKLAANWPLEQDELLTR(3)-MSEPLDLNQLAQK(1)	4	1.05e-06					n.a.
404	RS14(97)-RS10(1)	GEIPGLKK(7)-MQNQR(1)	4	1.35e-06			√		36.6237
405	RS20(16)-RL2(207)	AIQSEKAR(6)-VLGKAGAAR(4)	4	1.86e-06			√		86.386
406	RS8(69)-EFTU1(264),RS8(69)-EFTU2(264)	YFQGKAVVESIQR(5)-KLLDEGR(1)	4	2.05e-06			√		105.094
407	RL17(121)-RL1(14)	SEKAEAAAE(3)-EKVDATK(2)	4	2.75e-06			√		170.573
408	RS9(2)-RS2(28)	AENQYYGTGR(1)-MKPFIFGAR(2)	4	2.82e-06			√		91.09
409	IF3(97)-YHJE(232)	EIKFRPGTDEGDYQVK(3)-AKKQVK(2)	4	2.87e-06					n.a.
410	RL1(105)-RS7(114)	AAGAELVGMEDLADQIKK(17)-GDKSMALR(3)	4	4.97e-06		√	√		22.4385
411	EFTS(222)-EFTU1(314),EFTS(222)-EFTU2(314)	KFTGEVSLTGQPFVMEPSK(1)-FESEVYILSKDEGGR(10)	4	5.02e-06		√	√	√	12.6018
412	RS10(11)-RS9(100)	LKAFDHR(2)-KAGFVTR(1)	4	8.96e-06			√		29.7282
413	RL9(112)-SAPA(545)	DIADAVTAAGVEVAKSEVR(15)-QDEVKK(5)	4	1.01e-05					n.a.
414	EFTU1(264)-IF1(42),EFTU2(264)-IF1(42)	KLLDEGR(1)-KNYIR(1)	4	1.45e-05					n.a.
415	RL2(207)-RLMD(59)	VLGKAGAAR(4)-KQYAR(1)	4	2.23e-05					n.a.
416	RPOB(161)-RPOC(781)	SPGVFFDSDKGKTHSSGK(10)-KGLADTALK(1)	4	2.41e-05		√	√	√	19.5413
417	KBL(362)-YBJJ(1)	EGIYVTGFFYPVVPKGQARIR(15)-MTVNSSR(1)	4	2.53e-05					n.a.
418	RL27(44)-NARG(459)	GTKFHAGANVGCGR(3)-LPVKR(4)	4	2.61e-05					n.a.
419	ODP1(881)-RZPQ(29)	FNIDADKVNPR(7)-KWAER(1)	4	2.94e-05					n.a.
420	RS10(11)-RS9(13)	LKAFDHR(2)-KSSAAR(1)	4	3.21e-05			√		28.6082
421	RS21(25)-RL17(121)	SCEKAGVLAEVR(4)-SEKAEAAAE(3)	4	3.3e-05			√		145.305
422	RL17(99)-RS4(31)	ILKCGFR(3)-AIDTKCK(5)	4	3.42e-05		√	√		58.243
423	EFTS(207)-UCPA(79)	EYQVQLDIAMQSGKPKEIAEK(14)-EKEGR(2)	4	3.57e-05					n.a.
424	RL29(54)-RL1(54)	VKTLLNEK(2)-KSDQNVR(1)	4	3.89e-05			√		108.359
425	RL18(17)-RS1(247)	KLQELGATR(1)-VLKFDR(3)	4	3.97e-05					n.a.
426	GUAA(356)-WBBL(152)	AHVIKSHHNVGGLPK(5)-TKIPK(2)	4	4.02e-05					n.a.
427	RL16(34)-YICC(234)	GLAQGTDVSFGSFGLKAVGR(16)-KKEAVGR(1)	4	4.21e-05					n.a.
428	ARSR(67)-LACY(1)	QGKWVHYR(3)-MYYLK(1)	4	5.37e-05					n.a.
429	RL17(121)-RS18(50)	SEKAEAAAE(3)-AKYQR(2)	4	5.51e-05			√		148.554
430	PGK(30)-YIDJ(454)	ADLNVPVKDGKVTSDAR(11)-PWRKDAR(4)	4	6.29e-05					n.a.
431	RL17(121)-RS7(114)	SEKAEAAAE(3)-GDKSMALR(3)	4	6.6e-05			√		189.684
432	CARB(397)-PTFAH(18)	TQQESLQKALR(8)-AGDKEEAIR(4)	4	7.28e-05					n.a.
433	EFTU1(57)-NUOCD(254),EFTU2(57)-NUOCD(254)	AFDQIDNAPEEKAR(12)-GAEKMGER(4)	4	7.77e-05					n.a.
434	RS9(1)-ZAPE(58)	MAENQYYGTGR(1)-VGKLWGK(3)	4	8.11e-05					n.a.
435	ODP2(302)-YEHR(1)	QEAAAPAPAAKAEAPAAAPAAK(11)-MKAFNK(1)	4	8.22e-05					n.a.
436	ATPA(501)-CH60(226)	LKGILDSFK(2)-KISNIR(1)	4	8.66e-05					n.a.
437	CH60(80)-CAPP(17)	EVASKANDAAGDGTTTATVLAQAIITEGLK(5)-SNVSMLGKVLGETIK(8)	4	0.000106					n.a.
438	RS1(1)-RS15(73)	MTESFAQLFEESLK(1)-KDVAR(1)	4	0.000111					n.a.
439	RS17(16)-RS15(73)	VVSDKMEK(5)-KDVAR(1)	4	0.000168			√	√	20.26
440	RL1(54)-RL23(9)	KSDQNVR(1)-LLKVLR(3)	4	0.000176		√	√		112.823
441	RL2(265)-RS3(108)	TDKFIVR(3)-KPELDAK(1)	4	0.000182		√	√		60.4591
442	RL21(1)-EFTU1(264),RL21(1)-EFTU2(264)	MYAVFQSGGK(1)-KLLDEGR(1)	4	0.000193			√		148.599
443	WCAJ(403)-RS10(59)	HKVKPGITGWAQINGWR(2)-FTVLISPHVNKDAR(11)	4	0.000344					n.a.
444	EFTU1(264)-DLDH(2),EFTU1(264)-YQIC(80),EFTU2(264)-DLDH(2),EFTU2(264)-YQIC(80)	KLLDEGR(1)-STEIK(1)	4	0.000346					n.a.
445	RS16(76)-RS15(73)	VAALIKEVNK(6)-KDVAR(1)	4	0.000373			√		80.5202
446	FLIY(148)-YFFM(59)	TADDLKGK(6)-LFVKR(4)	4	0.00038					n.a.
447	RL28(26)-RS9(13)	SHALNATKR(8)-KSSAAR(1)	4	0.00039			√		83.7127
448	G3P1(124)-CH60(168)	KVVMTGPSKDNTPMFVK(9)-LIAEAMDKVGK(8)	4	0.000412		√			n.a.
449	EFTU1(264)-RS10(1),EFTU2(264)-RS10(1)	KLLDEGR(1)-MQNQR(1)	4	0.000438			√		158.066
450	RS2(143)-YIHG(2)	TRELEKLENSLGGIK(6)-ANLLNK(1)	4	0.00049					n.a.
451	RL4(166)-G3P1(108)	NLHKVDVR(4)-KHITAGAK(1)	4	0.000524					n.a.
452	CPDB(43)-RELA(1)	IMETTDLHSNMMDFDYYKDTATEK(18)-MVAVR(1)	4	0.000533					n.a.
453	CH60(42)-RS9(100)	NVVLDKSFGAPTITK(6)-KAGFVTR(1)	4	0.000546					n.a.
454	RL29(9)-RS15(73)	EKSVEELNTELLNLLR(2)-KDVAR(1)	4	0.00058			√		92.2357
455	RL18(17)-RS13(103)	KLQELGATR(1)-TKTNAR(2)	4	0.00075		√	√		77.845
456	EFTU1(314)-RS15(73),EFTU2(314)-RS15(73)	FESEVYILSKDEGGR(10)-KDVAR(1)	4	0.00095			√		130.645
457	RPOB(890)-NUSA(111)	VTPKGETQLTPEEK(4)-ITTQTAKQVIVQK(7)	4	0.00115		√			n.a.
458	MDTF(424)-YCJX(67)	VIAEDKLPPK(6)-LLGVKR(5)	4	0.00117					n.a.
459	RL23(19)-WCAK(77)	APHVSEKASTAMEK(7)-VKKVLR(2)	4	0.00169					n.a.
460	VIAA(213)-GLYA(354)	YGEFLNEQPELKRLAEQLGR(12)-NSVPNDPKSPFVTSGIR(8)	4	0.00176					n.a.
461	RL9(112)-BIRA(168)	DIADAVTAAGVEVAKSEVR(15)-LGADKVR(5)	4	0.00264					n.a.
462	PGK(193)-GLNE(493)	PMVAIVGGSKVSTK(10)-KELDKR(5)	4	0.00279					n.a.
463	RL9(89)-RS2(2)	AGDEGKLFGSIGTR(6)-ATVSMR(1)	4	0.00466			√		107.085
464	RF2(204)-CPDB(603)	KSPFDSGGR(1)-KLDIR(1)	4	0.00524					n.a.
465	RL9(112)-RS15(2)	DIADAVTAAGVEVAKSEVR(15)-SLSTEATAK(1)	3	5.68e-12			√		63.4755
466	RL1(105)-RS8(2)	AAGAELVGMEDLADQIKK(17)-SMQDPIADMLTR(1)	3	5.86e-11		√	√		127.542
467	DBHB(67)-RL2(183)	NPQTGKEITIAAAK(6)-KVEADCR(1)	3	1.25e-10		√			n.a.
468	RS9(2)-RL18(17)	AENQYYGTGR(1)-KLQELGATR(1)	3	2.21e-10			√		142.16
469	RL2(150)-GLNA(353)	NIPVGSTVHNVEMKPGKGGQLAR(17)-IPVVSSPKAR(8)	3	2.38e-10					n.a.
470	RS2(73)-EFTU1(264),RS2(73)-EFTU2(264)	ILFVGTKR(7)-KLLDEGR(1)	3	8.2e-10		√	√		127.526
471	RS2(105)-RL2(183)	WLGGMLTNWKTVR(10)-KVEADCR(1)	3	2.2e-09			√		73.3413
472	RL1(105)-RS9(2)	AAGAELVGMEDLADQIKK(17)-AENQYYGTGR(1)	3	3e-09			√		89.1735
473	RL9(57)-RS9(100)	RAELEAKLAEVLAAANAR(7)-KAGFVTR(1)	3	4.44e-09			√		103.002
474	RL2(71)-EFTU1(264),RL2(71)-EFTU2(264)	NKDGIPAVVER(2)-KLLDEGR(1)	3	6.59e-09			√		142.159
475	RS1(1)-RS2(11)	MTESFAQLFEESLK(1)-DMLKAGVHFGHQTR(4)	3	1.51e-08	√	√			n.a.
476	RS8(31)-G3P1(108)	AAVTMPSSKLK(9)-KHITAGAK(1)	3	2.81e-08					n.a.
477	STPA(66)-HNS(83)	ISTWLELMKADGINPEELLGNSSAAAPR(9)-EMLIADGIDPNELLNSLAAVKSGTK(21)	3	3.01e-08		√			n.a.
478	RS1(464)-RL6(6)	VTAVDAKGATVELADGVEGYLR(7)-VAKAPVVVPAGVDVK(3)	3	3.16e-08					n.a.
479	GLNA(353)-YIFB(466)	IPVVSSPKARR(8)-LLKVAR(3)	3	3.29e-08					n.a.
480	EFTU1(314)-RL10(37),EFTU2(314)-RL10(37)	FESEVYILSKDEGGR(10)-GVTVDKMTELR(6)	3	4.18e-08			√		44.5315
481	RPOB(943)-IF2(141),RPOB(943)-IF2(149)	DGVEKDKR(7)-EAAEQAKR(7)	3	5.89e-08					n.a.
482	ODO2(85)-DLDH(2),ODO2(85)-YQIC(80)	EGNSAGKETSAK(7)-STEIK(1)	3	6.93e-08		√			n.a.
483	RL18(17)-EFTU1(264),RL18(17)-EFTU2(264)	KLQELGATR(1)-KLLDEGR(1)	3	8.31e-08			√		155.396
484	DBHB(67)-GRPE(66)	NPQTGKEITIAAAK(6)-VKAEMENLR(2)	3	1.09e-07					n.a.
485	DNAK(387)-GRPE(66)	KDVNPDEAVAIGAAVQGGVLTGDVKDVLLLDVTPLSLGIETMGGVMTTLIAK(25)-VKAEMENLR(2)	3	1.36e-07		√			n.a.
486	RS7(149)-EFTU1(264),RS7(149)-EFTU2(264)	MAEANKAFAHYR(6)-KLLDEGR(1)	3	1.69e-07		√	√		131.265
487	RL7/12(71)-PFLB(386)	VAVIKAVR(5)-KFAAK(1)	3	1.7e-07					n.a.
488	YEBO(54)-KAD(157)	TNEQIELLEALLDQQKR(16)-KDDQEETVR(1)	3	3.56e-07					n.a.
489	SYL(738)-DBHA(67)	LAKAPTDGEQDR(3)-NPQTGKEIK(6)	3	4.55e-07					n.a.
490	RS4(83)-RS1(247)	LKGNTGENLLALLEGR(2)-VLKFDR(3)	3	5.13e-07					n.a.
491	GLNA(353)-RL7/12(71)	IPVVSSPKAR(8)-VAVIKAVR(5)	3	5.2e-07					n.a.
492	RL9(112)-RS3(108)	DIADAVTAAGVEVAKSEVR(15)-KPELDAK(1)	3	6.74e-07			√		89.1096
493	RS10(11)-RL1(54)	LKAFDHR(2)-KSDQNVR(1)	3	6.92e-07		√	√		106.268
494	DNAK(55)-PTFX2(517)	TTPSIIAYTQDGETLVGQPAKR(21)-EKLAEAK(2)	3	7.56e-07					n.a.
495	LRHA(55)-PLSX(95)	LEQLVGKELFARHGR(7)-VALELVKEGR(7)	3	1.31e-06					n.a.
496	EFTU1(314)-DNAK(155),EFTU2(314)-DNAK(155)	FESEVYILSKDEGGR(10)-QATKDAGR(4)	3	1.6e-06		√			n.a.
497	RS16(76)-RS2(2)	VAALIKEVNK(6)-ATVSMR(1)	3	1.98e-06			√		106.742
498	RL14(1)-EFTU1(264),RL14(1)-EFTU2(264)	MIQEQTMLNVADNSGAR(1)-KLLDEGR(1)	3	2.14e-06			√		54.2149
499	RL1(105)-DBHB(67)	AAGAELVGMEDLADQIKK(17)-NPQTGKEITIAAAK(6)	3	2.72e-06					n.a.
500	EFTU1(314)-RS10(1),EFTU2(314)-RS10(1)	FESEVYILSKDEGGR(10)-MQNQR(1)	3	3.91e-06			√		137.571
501	CYDA(505)-CYDB(109)	LGPSSLKTGR(7)-SKIEETR(2)	3	4.68e-06		√			n.a.
502	DBHB(67)-RS10(1)	NPQTGKEITIAAAK(6)-MQNQR(1)	3	6.89e-06					n.a.
503	FKBA(110)-IF1(42)	VKSSAQAK(2)-KNYIR(1)	3	8.46e-06					n.a.
504	RS9(2)-EFTU1(264),RS9(2)-EFTU2(264)	AENQYYGTGR(1)-KLLDEGR(1)	3	9.66e-06			√		166.476
505	YBIT(433)-YAHH(2)	LLFSQDDIKK(9)-NALSGLR(1)	3	1.04e-05					n.a.
506	RS12(108)-EFTU1(264),RS12(108)-EFTU2(264)	GALDCSGVKDR(9)-KLLDEGR(1)	3	1.1e-05			√		48.6292
507	DBHA(67)-RS6(106)	NPQTGKEIK(6)-AKDER(2)	3	1.14e-05					n.a.
508	DBHB(67)-RS4(77)	NPQTGKEITIAAAK(6)-NYYKEAAR(4)	3	1.15e-05					n.a.
509	RL1(54)-RS13(103)	KSDQNVR(1)-TKTNAR(2)	3	1.17e-05		√	√		62.7033
510	RL7/12(71)-PHSM(796)	VAVIKAVR(5)-IWQAKR(5)	3	1.57e-05					n.a.
511	G3P1(249)-EFTU1(264),G3P1(249)-EFTU2(264)	LEKAATYEQIK(3)-KLLDEGR(1)	3	1.71e-05					n.a.
512	FKBA(127)-NRDD(700)	DAADNEAKGK(8)-QEEVKRR(5)	3	1.71e-05					n.a.
513	SYK2(1)-YGID(149)	MSEQETR(1)-KLAALR(1)	3	1.84e-05					n.a.
514	YHIL(178)-PUR4(611)	WDVSKETFTK(5)-TPKMTR(3)	3	1.89e-05					n.a.
515	DLDH(106)-YJIG(2)	VINQLTGGLAGMAKGR(14)-TTQVR(1)	3	1.95e-05					n.a.
516	RS12(108)-RS9(13)	GALDCSGVKDR(9)-KSSAAR(1)	3	2.01e-05			√		89.7674
517	RS11(87)-RS10(1)	NLEVMVKGPGPGR(7)-MQNQR(1)	3	2.04e-05			√		100.082
518	RL9(57)-DBHB(67)	RAELEAKLAEVLAAANAR(7)-NPQTGKEITIAAAK(6)	3	2.05e-05					n.a.
519	PANB(11)-END1(160)	KPTTISLLQKYK(10)-EKAAEPPAR(2)	3	2.12e-05					n.a.
520	INSJ(162)-ARFB(1)	LMYLKK(5)-MIVISR(1)	3	2.22e-05					n.a.
521	RL9(112)-YNCE(124)	DIADAVTAAGVEVAKSEVR(15)-TGEVKGR(5)	3	2.33e-05		√			n.a.
522	DBHB(67)-RL9(1)	NPQTGKEITIAAAK(6)-MQVILLDK(1)	3	2.4e-05					n.a.
523	NARX(71)-FTSI(1)	LLAAVPLSEKDKPLIK(12)-MKAAAK(1)	3	3.1e-05					n.a.
524	RS6(93)-T1RK(269)	TKHAVTEASPMVK(2)-FSKGAR(3)	3	3.31e-05					n.a.
525	EFTU1(264)-RL1(14),EFTU2(264)-RL1(14)	KLLDEGR(1)-EKVDATK(2)	3	3.43e-05			√		196.585
526	DNAK(55)-DHE4(394)	TTPSIIAYTQDGETLVGQPAKR(21)-LGWKAEK(4)	3	3.54e-05					n.a.
527	ODO2(94)-DLDH(2),ODO2(94)-YQIC(80)	SEEKASTPAQR(4)-STEIK(1)	3	4.33e-05		√			n.a.
528	RL9(57)-RS10(1)	AELEAKLAEVLAAANAR(6)-MQNQR(1)	3	4.62e-05			√		159.395
529	RL2(68)-RS9(13)	IVDFKR(5)-KSSAAR(1)	3	4.64e-05			√		53.3696
530	RL6(6)-RL18(17)	VAKAPVVVPAGVDVK(3)-KLQELGATR(1)	3	4.86e-05		√	√		101.789
531	RS9(2)-RL21(85)	AENQYYGTGR(1)-KQQGHR(1)	3	5.24e-05			√		191.502
532	RL7/12(85)-BFD(13)	GATGLGLKEAKDLVESAPAALK(11)-KIRQAVR(1)	3	5.38e-05	√				n.a.
533	EFTU1(57)-VIAA(62),EFTU2(57)-VIAA(62)	AFDQIDNAPEEKAR(12)-SRLKDAR(4)	3	5.51e-05	√				n.a.
534	DNAJ(51)-EFTU1(264),DNAJ(51)-EFTU2(264)	EIKEAYEVLTDSQK(3)-KLLDEGR(1)	3	5.88e-05		√			n.a.
535	RL11(113)-RARD(2)	AQLQEIAQTKAADMTGADIEAMTR(10)-DAKQTR(1)	3	5.89e-05					n.a.
536	YEEE(196)-TREA(421)	TGIAHILFEKR(10)-ANKMATATK(3)	3	6.22e-05					n.a.
537	RS16(76)-RS1(247)	VAALIKEVNK(6)-VLKFDR(3)	3	6.52e-05					n.a.
538	RL1(105)-RL7/12(85)	AAGAELVGMEDLADQIKK(17)-EAKDLVESAPAALK(3)	3	6.79e-05		√	√		165.054
539	EFG(532)-YKGH(1)	GQYGHVVIDMYPLEPGSNPKGYEFINDIKGGVIPGEYIPAVDK(20)-MREQIK(1)	3	7.08e-05					n.a.
540	DBHA(67)-RL17(121)	NPQTGKEIK(6)-SEKAEAAAE(3)	3	7.68e-05					n.a.
541	MDTA(270)-CDD(208)	KLSEGTLLSLDNQIDATTGTIK(1)-SHMPYSKSPSGVALECK(7)	3	8.02e-05					n.a.
542	RL14(114)-RL1(54)	FMKIISLAPEVL(3)-KSDQNVR(1)	3	8.06e-05			√		131.955
543	G3P1(124)-EFTU1(314),G3P1(124)-EFTU2(314)	VVMTGPSKDNTPMFVK(8)-FESEVYILSKDEGGR(10)	3	9e-05					n.a.
544	RL2(183)-RS9(13)	KVEADCR(1)-KSSAAR(1)	3	9.15e-05			√		49.6617
545	LPLA(324)-YJIT(356)	ADMLQQECEALLVDFPEQEKELR(20)-KSEVR(1)	3	9.51e-05					n.a.
546	TGT(248)-ACP(10)	YLMGVGKPEDLVEGVR(7)-KIIGEQLGVK(1)	3	9.7e-05					n.a.
547	LEUE(100)-RL2(207)	ILYATLKGK(7)-VLGKAGAAR(4)	3	0.000114					n.a.
548	RL18(17)-RL13(68)	KLQELGATR(1)-VAVTGNKR(7)	3	0.000118		√	√		96.4219
549	EFTS(207)-YHFW(202)	EYQVQLDIAMQSGKPK(14)-ILDAAESKEGR(8)	3	0.000123					n.a.
550	SYN(114)-FOLB(98)	VEVAGWVEDPDTYPMAAKR(18)-LSKPGAVAR(3)	3	0.000135					n.a.
551	RIDA(58)-CH60(327)	TGEVPADVAAQARQSLDNVKAIVEAAGLK(20)-VVINKDTTTIIDGVGEEAAIQGR(5)	3	0.000136		√			n.a.
552	WCAI(394)-VSR(26)	TLDKENVLRQFINDIR(4)-DTAIEKR(6)	3	0.000137					n.a.
553	YCBB(557)-RISA(173)	ISDALKQGDTR(6)-TTLGKK(5)	3	0.000143					n.a.
554	EFP(31)-YHBT(4)	IMLDGEPYAVEASEFVKPGK(17)-MLDKLR(4)	3	0.000148					n.a.
555	RL29(44)-RS1(247)	MQAASGQLQQSHLLKQVR(15)-VLKFDR(3)	3	0.000153					n.a.
556	HNS(57)-STPA(38)	KLQQYR(1)-VVTKER(4)	3	0.000158		√			n.a.
557	RS6(35)-RS15(73)	YTAAITGAEGKIHR(11)-KDVAR(1)	3	0.000167			√		46.6181
558	RS1(247)-RS16(1)	VLKFDR(3)-MVTIR(1)	3	0.000185					n.a.
559	ALF(319)-CISY(310)	ANEAYLQGQLGNPKGEDQPNK(14)-VYKNYDPR(3)	3	0.000203					n.a.
560	YIEL(351)-YEEX(33)	DIAGLKTELEQK(6)-EIQDVEKK(7)	3	0.000206					n.a.
561	YQIH(136)-YJBI(440)	NVMQVTMQHALKLFWR(12)-IMNKGV(4)	3	0.000216					n.a.
562	END3(91)-EPTB(183)	AENIIKTCR(6)-LLDIQQKK(7)	3	0.00023					n.a.
563	EFTU1(57)-THIC(542),EFTU2(57)-THIC(542)	AFDQIDNAPEEKAR(12)-DNAMSKAR(6)	3	0.000234					n.a.
564	RL9(89)-RS2(28)	AGDEGKLFGSIGTR(6)-MKPFIFGAR(2)	3	0.000244			√		84.6426
565	ALF(319)-DTPB(137)	ANEAYLQGQLGNPKGEDQPNKK(14)-CYPPKDPR(5)	3	0.000273					n.a.
566	RL2(207)-G3P1(108)	VLGKAGAAR(4)-KHITAGAK(1)	3	0.000277					n.a.
567	RS5(156)-CHEA(346)	ATIDGLENMNSPEMVAAKRGK(18)-DLAGKLGK(5)	3	0.000288					n.a.
568	RL4(74)-RS9(100)	SGSIKSPIWR(5)-KAGFVTR(1)	3	0.000304		√	√		112.595
569	RS2(28)-EFTU1(264),RS2(28)-EFTU2(264)	MKPFIFGAR(2)-KLLDEGR(1)	3	0.000315		√	√		118.038
570	DBHA(67)-RL15(129)	NPQTGKEIK(6)-VTKGAR(3)	3	0.000335					n.a.
571	PFKB(217)-FRLB(197)	AAQEIVNSGKAK(10)-TWEEKGR(5)	3	0.000337					n.a.
572	RL2(108)-RS9(100)	YILAPKGLK(6)-KAGFVTR(1)	3	0.000367			√		45.8742
573	WZZB(193)-YJIT(356)	TQEVVAQEQKDLR(10)-KSEVR(1)	3	0.000377					n.a.
574	RS1(247)-RS2(2)	VLKFDR(3)-ATVSMR(1)	3	0.000399		√			n.a.
575	RS10(11)-YDIF(289)	IRLKAFDHR(4)-KLVAR(1)	3	0.000415					n.a.
576	RL6(6)-RL2(207)	VAKAPVVVPAGVDVK(3)-VLGKAGAAR(4)	3	0.000432			√		127.253
577	6PGD(458)-NUPX(26)	IDKEGVFHTEWLD(3)-KKISLR(2)	3	0.000432					n.a.
578	DBHA(67)-RS15(73)	NPQTGKEIK(6)-KDVAR(1)	3	0.000458					n.a.
579	RS4(83)-EFTU1(57),RS4(83)-EFTU2(57)	EAARLKGNTGENLLALLEGR(6)-AFDQIDNAPEEKAR(12)	3	0.00046			√		78.3153
580	RS4(22)-RL17(121)	EGTDLFLKSGVR(8)-SEKAEAAAE(3)	3	0.00047		√	√		153.363
581	RL2(207)-RS15(73)	VLGKAGAAR(4)-KDVAR(1)	3	0.000499			√		46.2261
582	TIG(48)-YHBP(135)	GKVPMNIVAQR(2)-KMIWLR(1)	3	0.000546					n.a.
583	RS7(114)-RS15(73)	GDKSMALR(3)-KDVAR(1)	3	0.000552			√		116.02
584	DBHB(67)-RS1(247)	NPQTGKEITIAAAK(6)-VLKFDR(3)	3	0.000562					n.a.
585	RL11(51)-RL7/12(71)	TDSIEKGLPIPVVITVYADR(6)-VAVIKAVR(5)	3	0.000569		√	√		33.6556
586	RL17(99)-RL2(68)	ILKCGFR(3)-IVDFKR(5)	3	0.000585		√	√		108.007
587	RL5(120)-FRMR(10)	GLSAKSFDGR(5)-KVLTR(1)	3	0.000646					n.a.
588	YAHF(454)-ACPT(141)	EAKAIAAAEGR(3)-EAIVKQR(5)	3	0.000656					n.a.
589	RS4(22)-RS15(73)	EGTDLFLKSGVR(8)-KDVAR(1)	3	0.000661			√		87.4556
590	EFTS(247)-EFTU1(264),EFTS(247)-EFTU2(264)	TVGQLLKEHNAEVTGFIR(7)-KLLDEGR(1)	3	0.000719		√	√		38.8166
591	RPOB(503)-TAMB(609)	PISAAVKEFFGSSQLSQFMDQNNPLSEITHK(7)-VEGDIKSTDQIAGKLDVR(14)	3	0.000721					n.a.
592	RL16(118)-PCKA(70)	EAFKLAAAK(4)-DKYIVR(2)	3	0.000876					n.a.
593	CARB(366)-OSMF(292)	FNFEKFAGANDR(5)-KVAADYLK(1)	3	0.000956					n.a.
594	SODF(44)-UGPQ(36)	DALAPHISAETIEYHYGKHHQTYVTNLNNLIKGTAFEGK(32)-YGHKMIEFDAK(4)	3	0.00104					n.a.
595	PURA(367)-METH(497)	EVTTTPLAADDWKGVEPIYETMPGWSESTFGVK(13)-KIEICRR(1)	3	0.00109					n.a.
596	RL7/12(85)-YIBL(89)	GATGLGLKEAKDLVESAPAALK(11)-KSVRGLVVVHPMTALGR(1)	3	0.00121					n.a.
597	FOLC(60)-YEEP(1)	LGVLKPAPFVFTVAGTNGKGTTCR(19)-MIQLFR(1)	3	0.00122					n.a.
598	EFTU1(57)-DCUS(324),EFTU2(57)-DCUS(324)	AFDQIDNAPEEKAR(12)-DKTEVR(2)	3	0.0014					n.a.
599	RL9(42)-RS15(73)	KNIEFFEAR(1)-KDVAR(1)	3	0.00158			√		116.943
600	CARB(966)-ARCA(187)	LLKQGFELDATHGTAIVLGEAGINPR(3)-AELLKK(5)	3	0.00195					n.a.
601	RS4(77)-RL2(265)	NYYKEAAR(4)-TDKFIVR(3)	3	0.00204			√		54.6683
602	LEPA(290)-GLNE(489)	KVKPQVYAGLFPVSSDDYEAFR(1)-KELDK(1)	3	0.00215					n.a.
603	CSRA(38)-CYDD(7)	IGVNAPKEVSVHR(7)-QKELTR(2)	3	0.00219					n.a.
604	RL9(112)-YOAB(1)	DIADAVTAAGVEVAKSEVR(15)-MTIVR(1)	3	0.00222					n.a.
605	ALF(115)-SAPA(545)	KLLPWIDGLLDAGEK(1)-QDEVKK(5)	3	0.00227					n.a.
606	YOEB(32)-YJJW(195)	INELIKDTR(6)-DNQQIKR(6)	3	0.00241					n.a.
607	RL1(167)-RL14(114)	NDKNGIIHTTIGK(3)-FMKIISLAPEVL(3)	3	0.00243			√		137.488
608	RS19(87)-RS13(114)	GHAADKK(6)-KPIKK(1)	3	0.00267		√	√	√	13.6005
609	RS9(100)-RS15(73)	KAGFVTR(1)-KDVAR(1)	3	0.0028			√		84.4189
610	EFTU1(264)-RS1(247),EFTU2(264)-RS1(247)	KLLDEGR(1)-VLKFDR(3)	3	0.00287					n.a.
611	RL9(42)-RL29(54)	KNIEFFEAR(1)-VKTLLNEK(2)	3	0.00305			√		70.4798
612	SYY(85)-DAPD(1)	FQQAGHKPVALVGGATGLIGDPSFKAAER(25)-MQQLQNIIETAFER(1)	3	0.00366					n.a.
613	PCKA(95)-FLIZ(2)	NDNKPLSPETWQHLK(4)-MVQHLK(1)	3	0.00388					n.a.
614	XYLR(151)-ARLY(101)	QLVAEEKYR(7)-VGQLGKK(6)	3	0.00402					n.a.
615	AAT(134)-ACRF(241)	VWVSNPSWPNHKSVFNSAGLEVR(12)-FKNPEEFGK(2)	3	0.00521					n.a.
616	FABI(205)-YJHR(202)	DFRKMLAHCEAVTPIR(4)-TLAGAQKK(7)	3	0.00639					n.a.
617	YJJJ(430)-CYSQ(1)	HIAQEMPEKIRQIEEK(9)-MLDQVCQLAR(1)	3	0.00755					n.a.
Intra-molecular Cross-links
618	FABI(205)-FABI(201)	KMLAHCEAVTPIR(1)-TLAASGIKDFR(8), KMLAHCEAVTPIRR(1)-TLAASGIKDFR(8)	457	2.63e-17	√		√	√	5.77076
619	G3P1(124)-G3P1(213)	KVVMTGPSKDNTPMFVK(9)-GASQNIIPSSTGAAKAVGK(15), VVMTGPSKDNTPMFVK(8)-GASQNIIPSSTGAAKAVGK(15)	369	4.4e-18			√	√	13.4304
620	PFLB(17)-PFLB(2)	LATAWEGFTKGDWQNEVNVR(10)-SELNEK(1)	352	4.7e-10			√	√	13.0764
621	PFLB(117)-PFLB(162)	ALIPFGGIKMIEGSCK(9)-KSGVLTGLPDAYGR(1), ALIPFGGIKMIEGSCKAYNR(9)-CRKSGVLTGLPDAYGR(3)	346	4.02e-18	√		√	√	17.399
622	IMDH(428)-IMDH(207)	LKEIIHQQMGGLR(2)-KPNACKDEQGR(1), LKEIIHQQMGGLR(2)-KPNACK(1)	278	1.97e-30					n.a.
623	G3P1(124)-G3P1(192)	VVMTGPSKDNTPMFVK(8)-TVDGPSHKDWR(8), KVVMTGPSKDNTPMFVK(9)-TVDGPSHKDWR(8)	278	2.97e-13	√		√	√	15.1619
624	HNS(83)-HNS(57)	EMLIADGIDPNELLNSLAAVKSGTK(21)-KLQQYR(1)	268	1.84e-13					n.a.
625	EFTS(207)-EFTS(214)	EYQVQLDIAMQSGKPK(14)-EIAEKMVEGR(5)	247	1.54e-12			√	√	10.2386
626	SODF(44)-SODF(2)	HHQTYVTNLNNLIKGTAFEGK(14)-SFELPALPYAK(1), DALAPHISAETIEYHYGKHHQTYVTNLNNLIKGTAFEGK(32)-SFELPALPYAK(1)	235	2.03e-27			√	√	7.17035
627	RS16(46)-RS16(76)	VGFFNPIASEKEEGTR(11)-VAALIKEVNK(6), VGFFNPIASEKEEGTRLDLDR(11)-VAALIKEVNK(6)	233	1.04e-11			√	√	14.3615
628	RL7/12(85)-RL7/12(71)	EAKDLVESAPAALK(3)-VAVIKAVR(5)	229	6.36e-09	√		√	√	9.06
629	EFTS(95)-EFTS(125)	DAGFQAFADKVLDAAVAGK(10)-VALVAKIGENINIR(6)	214	8.06e-15			√	√	16.6615
630	KPYK1(286)-KPYK1(13)	VVITATQMLDSMIKNPR(14)-IVCTIGPKTESEEMLAK(8), VVITATQMLDSMIKNPRPTR(14)-IVCTIGPKTESEEMLAK(8), KVVITATQMLDSMIKNPR(15)-IVCTIGPKTESEEMLAK(8)	210	5.38e-19			√	√	13.117
631	ATPA(118)-ATPA(1)	VVNTLGAPIDGKGPLDHDGFSAVEAIAPGVIER(12)-MQLNSTEISELIK(1)	202	8.02e-19					n.a.
632	PFLB(195)-PFLB(235)	VALYGIDYLMKDK(11)-ALGQMKEMAAK(6)	191	1.07e-12	√		√	√	14.0425
633	PGK(30)-PGK(84)	DGKVTSDAR(3)-DKLSNPVR(2), ADLNVPVKDGKVTSDAR(11)-DKLSNPVR(2)	190	2.81e-10	√		√	√	14.0251
634	RL6(85)-RL6(138)	ALLNSMVIGVTEGFTKK(16)-GADKQVIGQVAADLR(4)	189	2.71e-18			√	√	8.61074
635	PFLB(454)-PFLB(616)	TMLYAINGGVDEKLK(13)-KTGNTPDGR(1)	184	3.58e-13	√		√	√	7.41246
636	CARB(366)-CARB(504)	FNFEKFAGANDR(5)-LAKLAGVR(3)	184	9.88e-08			√		27.9328
637	RL9(57)-RL9(42)	RAELEAKLAEVLAAANAR(7)-KNIEFFEAR(1), AELEAKLAEVLAAANAR(6)-KNIEFFEAR(1)	176	6.57e-19			√	√	16.9727
638	PYRB(30)-PYRB(2)	DDLNLVLATAAKLK(12)-ANPLYQK(1)	166	2.01e-13	√		√	√	15.8435
639	CSRA(38)-CSRA(1)	IGVNAPKEVSVHR(7)-MLILTR(1), IGVNAPKEVSVHREEIYQR(7)-MLILTR(1)	166	7.35e-09	√		√	√	10.827
640	SYL(675)-SYL(738)	VWKLVYEHTAK(3)-LAKAPTDGEQDR(3), RVWKLVYEHTAK(4)-LAKAPTDGEQDR(3)	164	4.24e-20	√		√	√	12.7401
641	PFLB(195)-PFLB(2)	VALYGIDYLMKDK(11)-SELNEK(1), RVALYGIDYLMKDK(12)-SELNEK(1)	156	2.55e-12	√		√	√	10.639
642	CARB(379)-CARB(366)	LTTQMKSVGEVMAIGR(6)-FNFEKFAGANDR(5)	152	1.5e-14			√	√	11.8362
643	GNSA(31)-GNSA(1)	NTGKEVSEIR(4)-MNIEELKK(1), NTGKEVSEIR(4)-MNIEELK(1)	149	1.69e-08			√	√	13.7943
644	RS1(363)-RS1(450)	ANPWQQFAETHNKGDR(13)-KGAIVTGK(1), ANPWQQFAETHNKGDRVEGK(13)-KGAIVTGK(1)	147	5.36e-18					n.a.
645	TGT(248)-TGT(285)	YLMGVGKPEDLVEGVR(7)-NGHLFVTDGVVKIR(12)	146	7.15e-19					n.a.
646	RL9(22)-RL9(1)	VANLGSLGDQVNVKAGYAR(14)-MQVILLDK(1)	139	2.67e-15	√		√	√	4.73682
647	HNS(96)-HNS(136)	AQRPAKYSYVDENGETK(6)-SLDDFLIKQ(8), PAKYSYVDENGETK(3)-SLDDFLIKQ(8)	138	1.56e-15	√		√	√	8.90872
648	GLNA(48)-GLNA(353)	EQHVTIPAHQVNAEFFEEGKMFDGSSIGGWK(20)-IPVVSSPKAR(8), GKEQHVTIPAHQVNAEFFEEGKMFDGSSIGGWK(22)-IPVVSSPKAR(8)	135	4.17e-09					n.a.
649	CH60(80)-CH60(327)	EVASKANDAAGDGTTTATVLAQAIITEGLK(5)-VVINKDTTTIIDGVGEEAAIQGR(5)	133	1.91e-24			√	√	8.8702
650	SYV(909)-SYV(926)	IENKLANEGFVAR(4)-APEAVIAKER(8)	132	1.92e-12	√				n.a.
651	RL6(44)-RL6(6)	TLNDAVEVKHADNTLTFGPR(9)-VAKAPVVVPAGVDVK(3)	131	2.13e-22			√	√	9.81925
652	RPOC(87)-RPOC(50)	GVICEKCGVEVTQTK(6)-TFKPER(3)	131	2.39e-06	√		√	√	14.6452
653	TYPH(190)-TYPH(165)	DITATVDSIPLITASILAKK(19)-DVGVAIIGQTSSLAPADKR(18)	129	4.51e-18			√	√	9.81819
654	PFLB(454)-PFLB(162)	TMLYAINGGVDEKLK(13)-KSGVLTGLPDAYGR(1)	128	2.44e-17			√	√	11.0347
655	CARA(330)-CARA(298)	VTHKSLFDGTLQGIHR(4)-FGHHGGNHPVKDVEK(11)	127	1.08e-19			√	√	5.19485
656	TPIS(103)-TPIS(103)	TYHKESDELIAK(4)-TYHKESDELIAK(4), TYHKESDELIAKK(4)-TYHKESDELIAK(4), RTYHKESDELIAK(5)-TYHKESDELIAK(4)	126	5.39e-11			√	√	0
657	CH60(80)-CH60(42)	EVASKANDAAGDGTTTATVLAQAIITEGLK(5)-NVVLDKSFGAPTITK(6)	125	7.49e-20			√	√	15.1833
658	KAD(50)-KAD(40)	QAKDIMDAGK(3)-AAVKSGSELGK(4)	125	7.39e-09	√		√	√	8.37409
659	SYV(909)-SYV(930)	IENKLANEGFVAR(4)-EKLEGYAEAK(2), IENKLANEGFVAR(4)-EREKLEGYAEAK(4)	123	1.98e-14					n.a.
660	PGM(273)-PGM(2)	FMHLDKDGAIR(6)-AIHNR(1)	123	6.14e-10	√				n.a.
661	EFG(389)-EFG(440)	AGDIAAAIGLKDVTTGDTLCDPDAPIILER(11)-LAKEDPSFR(3)	121	2.22e-10	√		√	√	8.61492
662	FABI(43)-FABI(201)	EGAELAFTYQNDKLK(13)-TLAASGIKDFR(8)	120	6.88e-15			√		22.008
663	AAT(134)-AAT(116)	VWVSNPSWPNHKSVFNSAGLEVR(12)-VAADFLAKNTSVK(8)	119	4.64e-14			√	√	15.2743
664	KPYK2(102)-KPYK2(75)	FLLDANLGKGEGDK(9)-HVAILGDLQGPKIR(12), FLLDANLGKGEGDKEK(9)-HVAILGDLQGPKIR(12)	118	3.51e-19					n.a.
665	GLYA(331)-GLYA(346)	VVSGGTDNHLFLVDLVDKNLTGKEADAALGR(23)-ANITVNKNSVPNDPK(7), NLTGKEADAALGR(5)-ANITVNKNSVPNDPK(7)	118	2.4e-15	√		√	√	5.44837
666	SYY(85)-SYY(250)	FQQAGHKPVALVGGATGLIGDPSFKAAER(25)-KTSPYK(1)	118	3.21e-14			√		24.4208
667	RL28(10)-RL28(26)	VCQVTGKR(7)-SHALNATKR(8), VCQVTGKRPVTGNNR(7)-SHALNATKR(8)	117	3.65e-16	√		√	√	17.6232
668	SYGB(592)-SYGB(584)	VSNILAKSDEVLSDR(7)-TLDAAAALAAANKR(13)	116	1.13e-20	√				n.a.
669	GLYA(331)-GLYA(62)	NLTGKEADAALGR(5)-YAEGYPGKR(8), VVSGGTDNHLFLVDLVDKNLTGKEADAALGR(23)-YAEGYPGKR(8)	116	2.56e-14	√		√	√	11.3314
670	GLYA(346)-GLYA(62)	ANITVNKNSVPNDPK(7)-YAEGYPGKR(8)	115	2.89e-10	√		√	√	12.3677
671	CLPB(335)-CLPB(199)	FQKVFVAEPSVEDTIAILR(3)-TKNNPVLIGEPGVGK(2)	114	6.49e-27			√	√	9.96253
672	RPOB(1262)-RPOB(1242)	STGSYSLVTQQPLGGKAQFGGQR(16)-LNHLVDDKMHAR(8)	114	1.04e-17			√	√	8.18021
673	DBHA(22)-DBHA(3)	TQAKAALESTLAAITESLK(4)-MNKTQLIDVIAEK(3)	113	8.08e-22			√	√	8.6822
674	ACCC(159)-ACCC(116)	IGYPVIIKASGGGGGR(8)-LMGDKVSAIAAMK(5)	111	4.02e-13			√	√	8.64012
675	AHPC(153)-AHPC(171)	IKAAQYVASHPGEVCPAK(2)-WKEGEATLAPSLDLVGK(2), KIKAAQYVASHPGEVCPAK(3)-WKEGEATLAPSLDLVGK(2)	109	7.7e-25					n.a.
676	EFTU1(57)-EFTU1(264),EFTU2(57)-EFTU2(264)	AFDQIDNAPEEKAR(12)-KLLDEGR(1)	109	2.82e-15	√		√	√	16.7172
677	SYK1(82)-SYK1(132)	IMGKASFVTLQDVGGR(4)-TKTGELSIHCTELR(2)	107	3.05e-25			√	√	17.9309
678	CDD(173)-CDD(208)	DLEIKTLLMDEQDHGYALTGDALSQAAIAAANR(5)-SHMPYSKSPSGVALECK(7)	106	5.13e-23			√	√	13.765
679	DKSA(8)-DKSA(1)	KTSSLSILAIAGVEPYQEKPGEEYMNEAQLAHFR(1)-MQEGQNR(1)	103	5.75e-17					n.a.
680	FOLD(9)-FOLD(56)	IIDGKTIAQQVR(5)-KACEEVGFVSR(1)	103	7.1e-13			√	√	15.4759
681	DNAK(55)-DNAK(263)	TTPSIIAYTQDGETLVGQPAKR(21)-LKEAAEK(2)	103	5.32e-11	√		√	√	12.3296
682	ENO(195)-ENO(62)	MGSEVFHHLAKVLK(11)-FLGKGVTK(4)	103	3.56e-10			√	√	15.57
683	RL1(141)-RL1(167)	GLMPNPKVGTVTPNVAEAVK(7)-NDKNGIIHTTIGK(3)	100	1.5e-14			√	√	11.2887
684	PTA(665)-PTA(639)	ATVFIFPDLNTGNTTYKAVQR(17)-SKAPNSPVAGR(2)	96	6.97e-14					n.a.
685	ATPA(384)-ATPA(388)	VGGAAQTKIMK(8)-KLSGGIR(1)	96	1.17e-08	√		√	√	6.40572
686	RS10(59)-RS10(11)	FTVLISPHVNKDAR(11)-LKAFDHR(2)	95	1.07e-15	√		√		32.6451
687	CH60(390)-CH60(277)	VGAATEVEMKEK(10)-VAAVKAPGFGDR(5)	94	5.61e-14			√	√	12.9686
688	MDH(99)-MDH(134)	SDLFNVNAGIVKNLVQQVAK(12)-KAGVYDK(1)	94	3.85e-09	√		√	√	11.2141
689	RPOB(890)-RPOB(914)	VTPKGETQLTPEEK(4)-ASDVKDSSLR(5)	94	1.54e-08			√	√	5.13771
690	PDXB(179)-PDXB(48)	ADILTFHTPLFKDGPYK(12)-SVTKVNESLLAGKPIK(4), ADILTFHTPLFKDGPYK(12)-SVTKVNESLLAGK(4)	93	1.14e-20					n.a.
691	PFLB(162)-PFLB(616)	KSGVLTGLPDAYGR(1)-KTGNTPDGR(1)	93	1.42e-16	√		√	√	9.34108
692	DNAK(304)-DNAK(246)	AKLESLVEDLVNR(2)-KDQGIDLR(1)	93	8.56e-14	√		√	√	16.2249
693	GRCA(62)-GRCA(1)	EVPVEVKPEVR(7)-MITGIQITK(1)	93	1.63e-11	√				n.a.
694	RL9(57)-RL9(35)	RAELEAKLAEVLAAANAR(7)-NFLVPQGKAVPATK(8), AELEAKLAEVLAAANAR(6)-NFLVPQGKAVPATK(8)	93	3.06e-11			√	√	9.73225
695	6PGD(260)-6PGD(454)	KDEDGNYLVDVILDEAANKGTGK(19)-DYFGAHTYKR(9), DEDGNYLVDVILDEAANKGTGK(18)-DYFGAHTYKR(9)	92	1.59e-13			√	√	15.3686
696	EFG(532)-EFG(562)	GQYGHVVIDMYPLEPGSNPKGYEFINDIK(20)-GIQEQLKAGPLAGYPVVDMGIR(7)	91	1.37e-30			√	√	11.2542
697	RL1(205)-RL1(54)	AKPTQAKGVYIK(7)-KSDQNVR(1), PTQAKGVYIK(5)-KSDQNVR(1)	91	1.07e-12	√		√	√	9.04203
698	CH10(34)-CH10(15)	SAGGIVLTGSAAAKSTR(14)-KEVETK(1)	91	3.38e-10			√	√	8.72032
699	AHPC(169)-AHPC(186)	AAQYVASHPGEVCPAKWK(16)-EGEATLAPSLDLVGKI(15)	89	6.45e-17					n.a.
700	ACCA(53)-ACCA(46)	KIFADLGAWQIAQLAR(1)-EKSVELTR(2)	89	1.16e-10	√		√	√	10.2482
701	RS2(11)-RS2(2)	DMLKAGVHFGHQTR(4)-ATVSMR(1)	89	2.92e-08	√		√	√	15.4985
702	CARB(899)-CARB(1006)	EVVLPFNKFPGVDPLLGPEMR(8)-IKNGEYTYIINTTSGR(2)	88	2.15e-17			√	√	19.0567
703	EFTU1(253)-EFTU1(300),EFTU2(253)-EFTU2(300)	ETQKSTCTGVEMFR(4)-PGTIKPHTK(5), ETQKSTCTGVEMFR(4)-GQVLAKPGTIKPHTK(11)	88	2.13e-15	√		√	√	12.4465
704	CARB(649)-CARB(366)	GVIVQYGGQTPLKLAR(13)-FNFEKFAGANDR(5)	88	1.41e-14	√		√	√	20.6078
705	PANC(39)-PANC(181)	VALVPTMGNLHDGHMKLVDEAK(16)-AKDGLALSSR(2)	88	3.34e-13			√	√	14.3334
706	SYV(930)-SYV(926)	EKLEGYAEAK(2)-APEAVIAKER(8)	88	3.86e-10					n.a.
707	RPOB(1262)-RPOB(914)	STGSYSLVTQQPLGGKAQFGGQR(16)-ASDVKDSSLR(5)	87	6.65e-11			√	√	16.3556
708	RS3(89)-RS3(86)	KVVADIAGVPAQINIAEVR(1)-KGEDVEKLR(7), KVVADIAGVPAQINIAEVR(1)-GEDVEKLR(6)	87	9.28e-11			√	√	4.37152
709	GREA(22)-GREA(63)	LREELDFLKSVR(9)-IKDIEAK(2), EELDFLKSVR(7)-IKDIEAK(2)	87	1.31e-09			√	√	10.4957
710	RS4(83)-RS4(77)	LKGNTGENLLALLEGR(2)-NYYKEAAR(4)	87	1.92e-07	√		√	√	10.0731
711	EFG(153)-EFG(425)	MGANFLKVVNQIK(7)-TKADQEK(2)	87	1.08e-06			√		56.3093
712	G3P1(132)-G3P1(331)	DNTPMFVKGANFDK(8)-VLDLIAHISK(10)	86	6.94e-17			√	√	14.326
713	EFG(39)-EFG(370)	ILFYTGVNHKIGEVHDGAATMDWMEQEQER(10)-IVQMHANKR(8)	86	6.29e-13			√	√	11.8321
714	RPOB(1065)-RPOB(1073)	IQPGDKMAGR(6)-HGNKGVISK(4)	86	2.72e-10	√		√	√	6.92075
715	RPOB(844)-RPOB(914)	DTKLGPEEITADIPNVGEAALSK(3)-ASDVKDSSLR(5)	86	2.73e-09			√	√	13.9149
716	EFG(440)-EFG(134)	LAKEDPSFR(3)-YKVPR(2)	86	5.23e-07	√		√		25.7838
717	GSHB(174)-GSHB(205)	VKEGDPNLGVIAETLTEHGTR(2)-YCMAQNYLPAIKDGDKR(12), VKEGDPNLGVIAETLTEHGTR(2)-YCMAQNYLPAIKDGDK(12)	85	3.32e-21	√		√	√	15.6401
718	SODM(187)-SODM(119)	RPDYIKEFWNVVNWDEAAAR(6)-AEFEKAAASR(5)	85	1.23e-08			√	√	11.0441
719	CH60(51)-CH60(117)	SFGAPTITKDGVSVAR(9)-AVAAGMNPMDLKR(12)	84	4.9e-18	√		√	√	12.1671
720	PFLB(7)-PFLB(195)	SELNEKLATAWEGFTK(6)-VALYGIDYLMKDK(11)	84	2.28e-16			√	√	14.5405
721	PHSM(54)-PHSM(2)	AQPFAKPVANQR(6)-SQPIFNDK(1)	84	5.57e-13	√		√	√	8.79085
722	CARB(899)-CARB(366)	EVVLPFNKFPGVDPLLGPEMR(8)-FNFEKFAGANDR(5)	84	4.9e-12			√	√	12.4406
723	DPS(101)-DPS(10)	AVQLGGVALGTTQVINSKTPLK(18)-SKATNLLYTR(2)	83	1.84e-19			√		23.5747
724	IMDH(428)-IMDH(396)	LKEIIHQQMGGLR(2)-GMGSLGAMSKGSSDR(10)	83	5.19e-18					n.a.
725	EFTU1(253)-EFTU1(264),EFTU2(253)-EFTU2(264)	ETQKSTCTGVEMFR(4)-KLLDEGR(1)	83	2.37e-10			√		24.3459
726	RS1(434)-RS1(450)	ISLGVKQLAEDPFNNWVALNK(6)-KGAIVTGK(1)	83	3.44e-10					n.a.
727	CDD(265)-CDD(208)	AVLAEKADAPLIQWDATSATLK(6)-SHMPYSKSPSGVALECK(7)	82	6.51e-21			√	√	9.56292
728	MDH(99)-MDH(312)	SDLFNVNAGIVKNLVQQVAK(12)-DIALGEEFVNK(11), SDLFNVNAGIVKNLVQQVAK(12)-KDIALGEEFVNK(12)	82	9.64e-14			√	√	11.994
729	EFTU1(314)-EFTU1(264),EFTU2(314)-EFTU2(264)	FESEVYILSKDEGGR(10)-KLLDEGR(1)	82	4.48e-10			√		23.0676
730	IMDH(411)-IMDH(396)	YFQSDNAADKLVPEGIEGR(10)-GMGSLGAMSKGSSDR(10)	81	1.13e-17					n.a.
731	HTPG(238)-HTPG(362)	NKSEITDEEYKEFYK(2)-VLQMLEKLAK(7), NKSEITDEEYK(2)-VLQMLEKLAK(7)	81	1.01e-14	√		√	√	16.5783
732	PGM(516)-PGM(2)	PSGTEDAYKIYCESFLGEEHRK(9)-AIHNR(1), PSGTEDAYKIYCESFLGEEHR(9)-AIHNR(1)	81	4.99e-07					n.a.
733	SYY(85)-SYY(144)	FQQAGHKPVALVGGATGLIGDPSFKAAER(25)-DIGKHFSVNQMINK(4)	80	4.33e-19			√	√	16.1043
734	CH60(327)-CH60(277)	VVINKDTTTIIDGVGEEAAIQGR(5)-VAAVKAPGFGDR(5)	80	2.25e-18			√	√	9.57233
735	CARB(899)-CARB(379)	EVVLPFNKFPGVDPLLGPEMR(8)-LTTQMKSVGEVMAIGR(6)	80	2.39e-13			√	√	6.66034
736	RS1(279)-RS1(347)	RYPEGTKLTGR(7)-ISLGLKQCK(6), YPEGTKLTGR(6)-ISLGLKQCK(6)	80	1.75e-12	√		√	√	10.993
737	PGK(82)-PGK(30)	VMVTSHLGRPTEGEYNEEFSLLPVVNYLKDK(29)-DGKVTSDAR(3), PTEGEYNEEFSLLPVVNYLKDK(20)-DGKVTSDAR(3)	80	2.09e-10			√	√	12.5707
738	YEJL(73)-YEJL(2)	ALQSSINEDKAH(10)-PQISR(1)	80	3.81e-10			√	√	19.1314
739	SYY(85)-SYY(90)	FQQAGHKPVALVGGATGLIGDPSFKAAER(25)-KLNTEETVQEWVDK(1)	79	5.51e-18	√		√	√	11.6957
740	SYK2(156)-SYK2(179)	ALRPLPDKFHGLQDQEVR(8)-YLDLIANDKSR(9)	79	1.19e-13					n.a.
741	SUCC(215)-SUCC(1)	QGDLICLDGKLGADGNALFR(10)-MNLHEYQAK(1)	79	1.39e-11	√		√	√	10.7335
742	PURA(367)-PURA(125)	EVTTTPLAADDWKGVEPIYETMPGWSESTFGVK(13)-GAKAIGTTGR(3)	79	5.24e-10			√	√	13.4554
743	RPOC(1132)-RPOC(781)	IPQESGGTKDITGGLPR(9)-KGLADTALK(1)	78	2.27e-12	√		√	√	12.6642
744	RPOC(1192)-RPOC(1072)	LVITPVDGSDPYEEMIPKWR(18)-TAGGKDLRPALK(5)	78	1.6e-11	√		√	√	12.0396
745	KAD(145)-KAD(157)	VEGKDDVTGEELTTR(4)-KDDQEETVR(1)	77	1.34e-15			√	√	17.9861
746	BCP(40)-BCP(77)	VLVYFYPKAMTPGCTVQACGLR(8)-AGVDVLGISTDKPEKLSR(15)	77	9.29e-13					n.a.
747	CARB(649)-CARB(504)	GVIVQYGGQTPLKLAR(13)-LAKLAGVR(3)	76	7.09e-11			√	√	19.4126
748	TYPA(337)-TYPA(50)	LNKELVHNVALR(3)-VMDSNDLEKER(9)	75	1.7e-21					n.a.
749	KBL(90)-KBL(23)	FICGTQDSHKELEQK(10)-AEGLFKEER(6)	75	3.92e-11			√	√	15.2787
750	SYL(813)-SYL(738)	AKITVPVDATEEQVR(2)-LAKAPTDGEQDR(3)	74	2.65e-22			√		24.0861
751	CH60(42)-CH60(390)	NVVLDKSFGAPTITK(6)-VGAATEVEMKEK(10)	74	2.46e-15			√	√	12.3278
752	GLYA(62)-GLYA(250)	YAEGYPGKR(8)-GGSEELYKK(8)	74	4.42e-13			√	√	12.9955
753	YFBU(55)-YFBU(1)	ELDREFGELKEETCR(10)-MEMTNAQR(1), EFGELKEETCR(6)-MEMTNAQR(1)	74	3.67e-11	√				n.a.
754	SYM(466)-SYM(403)	YVDEQAPWVVAKQEGR(12)-NAGFINKR(7)	74	5.25e-09	√		√	√	13.4238
755	TPIS(103)-TPIS(111)	TYHKESDELIAK(4)-ESDELIAKK(8), TYHKESDELIAK(4)-TYHKESDELIAKK(12)	73	1.82e-12			√	√	14.4665
756	NUSA(16)-NUSA(111)	EILAVVEAVSNEKALPR(13)-ITTQTAKQVIVQK(7)	73	4.84e-12			√	√	11.7641
757	DNAK(304)-DNAK(299)	AKLESLVEDLVNR(2)-HMNIKVTR(5)	73	8.68e-10	√		√	√	9.12257
758	RS4(206)-RS4(77)	SDLSADINEHLIVELYSK(18)-NYYKEAAR(4)	73	1.21e-08			√	√	11.9383
759	6PGD(75)-6PGD(38)	ILLMVKAGAGTDAAIDSLKPYLDK(6)-EKTEEVIAENPGKK(2), ILLMVKAGAGTDAAIDSLKPYLDK(6)-EKTEEVIAENPGK(2), ILLMVKAGAGTDAAIDSLKPYLDK(6)-SREKTEEVIAENPGK(4)	72	2.47e-15			√	√	14.3666
760	IF2(186)-IF2(194)	KAEEEARR(1)-KLEEEAR(1), KAEEEAR(1)-KLEEEAR(1)	72	5.3e-09	√				n.a.
761	CH60(327)-CH60(42)	VVINKDTTTIIDGVGEEAAIQGR(5)-NVVLDKSFGAPTITK(6)	71	1e-17			√	√	17.2882
762	RL1(167)-RL1(54)	NDKNGIIHTTIGK(3)-KSDQNVR(1), YRNDKNGIIHTTIGK(5)-KSDQNVR(1)	71	1.99e-12	√		√	√	4.5641
763	RL7/12(109)-RL7/12(101)	KALEEAGAEVEVK(1)-EGVSKDDAEALK(5)	71	1.42e-10	√		√	√	11.4153
764	RPOB(1242)-RPOB(1065)	LNHLVDDKMHAR(8)-IQPGDKMAGR(6)	71	6.92e-10			√	√	10.413
765	IF2(808)-IF2(849)	SPKFGAIAGCMVTEGVVK(3)-FKDDVNEVR(2)	70	8.85e-16			√	√	20.2377
766	TKT1(340)-TKT1(347)	GEMPSDFDAKAK(10)-EFIAKLQANPAK(5), MKGEMPSDFDAKAK(12)-EFIAKLQANPAK(5)	70	4.14e-14			√	√	10.5681
767	ACP(10)-ACP(2)	KIIGEQLGVK(1)-STIEER(1)	70	4.72e-10	√		√	√	9.64317
768	EFTU1(314)-EFTU1(57),EFTU2(314)-EFTU2(57)	FESEVYILSKDEGGR(10)-AFDQIDNAPEEKAR(12)	69	3.45e-22			√	√	14.2399
769	CAN(213)-CAN(220)	HGISNLKLK(7)-HANHK(5)	69	8.61e-15					n.a.
770	EFTU1(177)-EFTU1(264),EFTU2(177)-EFTU2(264)	GSALKALEGDAEWEAK(5)-KLLDEGR(1)	69	2.01e-13			√		22.884
771	HNS(6)-HNS(57)	SEALKILNNIR(5)-KLQQYR(1)	69	3.57e-08					n.a.
772	GRCA(26)-GRCA(1)	AANDDLLNSFWLLDSEKGEAR(17)-MITGIQITK(1)	68	2.38e-19	√				n.a.
773	FKBA(179)-FKBA(69)	GTLIDGKEFDNSYTR(7)-EQEKLGIK(4)	68	9.67e-07			√	√	16.2826
774	IMDH(411)-IMDH(110)	YFQSDNAADKLVPEGIEGR(10)-EVKELTER(3)	67	7.1e-11					n.a.
775	ODO2(133)-ODO2(148)	LLAEHNLDASAIKGTGVGGR(13)-EDVEKHLAK(5)	67	2.01e-10	√		√	√	9.88953
776	KPYK2(160)-KPYK2(85)	VFTEVTVGGPLSNNKGINK(15)-EGKVFLNIGDK(3)	67	5.3e-10					n.a.
777	FKBA(69)-FKBA(110)	EQEKLGIK(4)-VKSSAQAK(2)	67	1.77e-06			√	√	11.8581
778	NUOF(55)-NUOF(78)	ALTGLSPDEIVNQVKDAGLK(15)-WSLMPKDESMNIR(6)	66	2.12e-15					n.a.
779	ODO2(2)-ODO2(85)	SSVDILVPDLPESVADATVATWHK(1)-EGNSAGKETSAK(7)	66	7.96e-09					n.a.
780	DNAK(363)-DNAK(351)	KDVNPDEAVAIGAAVQGGVLTGDVK(1)-MPMVQKK(6)	66	9.6e-08			√	√	12.4172
781	DXR(217)-DXR(37)	KISVDSATMMNK(1)-VVALVAGKNVTR(8)	65	6.04e-17			√	√	15.7543
782	CH60(122)-CH60(117)	GIDKAVTAAVEELK(4)-AVAAGMNPMDLKR(12)	65	1.27e-13	√		√	√	8.29899
783	RL2(108)-RL2(207)	YILAPKGLK(6)-VLGKAGAAR(4)	65	6.28e-11			√		26.1776
784	UPP(70)-UPP(14)	KITVVPILR(1)-HKLGLMR(2)	65	8.77e-10			√	√	14.3124
785	EFG(159)-EFG(425)	VVNQIKTR(6)-TKADQEK(2)	65	1.33e-08			√		54.4763
786	PGM(516)-PGM(273)	PSGTEDAYKIYCESFLGEEHR(9)-FMHLDKDGAIR(6), PSGTEDAYKIYCESFLGEEHRK(9)-FMHLDKDGAIR(6)	65	4.49e-08					n.a.
787	KPYK1(317)-KPYK1(13)	AEAGDVANAILDGTDAVMLSGESAKGK(25)-IVCTIGPKTESEEMLAK(8)	64	7.01e-18			√	√	5.68791
788	SYY(85)-SYY(238)	FQQAGHKPVALVGGATGLIGDPSFKAAER(25)-FGKTEGGAVWLDPK(3)	64	1.34e-12			√	√	15.9622
789	DNAK(528)-DNAK(581)	DAEANAEADRKFEELVQTR(11)-GEDKAAIEAK(4), KFEELVQTR(1)-GEDKAAIEAK(4), KFEELVQTR(1)-TAIESALTALETALKGEDKAAIEAK(19)	64	1.96e-11			√	√	8.39851
790	RL2(59)-RL2(207)	HIGGGHKQAYR(7)-VLGKAGAAR(4)	64	4.06e-11			√	√	17.4744
791	RHO(379)-RHO(417)	KEELLTTQEELQKMWILR(13)-TNDDFFEMMKR(10)	64	5.78e-11			√	√	11.247
792	HTPG(271)-HTPG(354)	VEGKQEYTSLLYIPSQAPWDMWNR(4)-NALTKR(5)	64	9.13e-07			√	√	16.1136
793	RRF(15)-RRF(7)	MDKCVEAFK(3)-KDAEVR(1)	63	1.12e-08	√		√	√	11.1269
794	TYPA(396)-TYPA(386)	KQEPYENVTLDVEEQHQGSVMQALGER(1)-PKVIFR(2)	63	1.07e-07					n.a.
795	SYM(529)-SYM(403)	VNPFKALYNR(5)-NAGFINKR(7)	62	3.01e-10			√	√	13.389
796	RIMP(143)-RIMP(112)	DEVFALSNIQKANLVPHF(11)-KWQGVIK(1), AVDGEMITVTVEGKDEVFALSNIQKANLVPHF(25)-KWQGVIK(1)	61	6.36e-08					n.a.
797	RL3(38)-RL3(1)	VTQVKDLANDGYR(5)-MIGLVGK(1)	61	1.54e-07	√		√	√	12.9124
798	GLMU(15)-GLMU(156)	MLNNAMSVVILAAGKGTR(15)-VTGIVEHKDATDEQR(8)	60	2.58e-18			√	√	18.0738
799	EFTU1(10)-EFTU1(264),EFTU2(10)-EFTU2(264)	TKPHVNVGTIGHVDHGK(2)-KLLDEGR(1)	60	2.27e-14			√	√	13.6725
800	RHO(367)-RHO(181)	KEELLTTQEELQK(1)-GLIVAPPKAGK(8)	60	8e-14			√	√	10.076
801	SYY(90)-SYY(250)	KLNTEETVQEWVDK(1)-KTSPYK(1)	60	1.23e-10			√	√	20.4279
802	RL7/12(109)-RL7/12(71)	KALEEAGAEVEVK(1)-VAVIKAVR(5)	60	2.75e-10			√	√	13.5239
803	RL5(145)-RL5(120)	EQIIFPEIDYDKVDR(12)-GLSAKSFDGR(5)	60	3.91e-09			√		27.6159
804	EFTU1(38)-EFTU1(57),EFTU2(38)-EFTU2(57)	TTLTAAITTVLAKTYGGAAR(13)-AFDQIDNAPEEKAR(12)	59	5.68e-17			√	√	21.6592
805	RS8(56)-RS8(2)	VEGDTKPELELTLK(6)-SMQDPIADMLTR(1)	59	8.24e-14			√	√	11.9589
806	ODO2(211)-ODO2(218)	NSTAMLTTFNEVNMKPIMDLR(15)-KQYGEAFEK(1)	59	5.48e-13			√	√	10.2755
807	SYK2(156)-SYK2(2)	ALRPLPDKFHGLQDQEVR(8)-SEQETR(1)	59	6.3e-09	√				n.a.
808	GLMM(147)-GLMM(44)	EISCVDSAELGKASR(12)-KIIIGK(1)	58	2.19e-15					n.a.
809	RL1(197)-RL1(200)	ENLEALLVALKK(11)-AKPTQAK(2), LKENLEALLVALKK(13)-AKPTQAK(2)	58	1.32e-13			√	√	4.7106
810	ODO2(133)-ODO2(152)	LLAEHNLDASAIKGTGVGGR(13)-HLAKAPAK(4)	58	3.97e-13			√	√	13.3685
811	RHO(336)-RHO(181)	MDEVIYEEFKGTGNMELHLSR(10)-GLIVAPPKAGK(8)	58	8.83e-10			√	√	11.7441
812	HIS6(236)-HIS6(19)	DADVDGALAASVFHKQIINIGELK(15)-DGQVVKGVQFR(6)	58	8.02e-09					n.a.
813	EFG(153)-EFG(440)	MGANFLKVVNQIK(7)-LAKEDPSFR(3)	58	1.6e-08			√		41.9706
814	RS20(16)-RS20(19)	AIQSEKAR(6)-KHNASR(1)	58	8.5e-08	√		√	√	4.59564
815	UDP(33)-UDP(235)	NDLQGATLAIVPGDPDRVEKIAALMDK(20)-TQQEIPNAETMKQTESHAVK(12), VEKIAALMDKPVK(3)-TQQEIPNAETMKQTESHAVK(12)	57	1.25e-16			√	√	10.8758
816	IF2(184)-IF2(173)	EQEAAELKR(8)-NAQAEKAR(6), REQEAAELKR(9)-NAQAEKAR(6)	57	1.99e-11					n.a.
817	RL5(69)-RL5(72)	PLITKAR(5)-KSVAGFK(1), LLDNAAADLAAISGQKPLITKAR(21)-KSVAGFK(1)	57	3.63e-10			√	√	8.44241
818	ODO2(297)-ODO2(300)	DVDTLGMADIEKK(12)-IKELAVK(2)	57	2.44e-09			√	√	5.05532
819	RPOB(191)-RPOB(203)	GSWLDFEFDPKDNLFVR(11)-KLPATIILR(1)	56	3.57e-16			√	√	13.5793
820	ODO2(133)-ODO2(300)	LLAEHNLDASAIKGTGVGGR(13)-IKELAVK(2)	56	1.8e-14					n.a.
821	MDH(217)-MDH(82)	IQNAGTEVVEAKAGGGSATLSMGQAAAR(12)-KPGMDR(1)	56	5.41e-14	√		√	√	8.92768
822	FABA(162)-FABA(113)	LIYTASDLKVGLFQDTSAF(9)-ALGVGEVKFTGQVLPTAK(8)	56	7.13e-11			√	√	9.14195
823	GLNB(40)-GLNB(9)	QKGHTELYR(2)-KIDAIIKPFK(7), QKGHTELYR(2)-IDAIIKPFK(6)	56	1.08e-07			√	√	12.9869
824	PYRI(94)-PYRI(1)	IDNYEVVGKSRPSLPER(9)-MTHDNK(1), IDNYEVVGKSR(9)-MTHDNK(1)	55	1.16e-17			√	√	11.1524
825	MOAB(141)-MOAB(2)	TLIFAMPGSTKACR(11)-SQVSTEFIPTR(1)	55	6.39e-13					n.a.
826	MUG(109)-MUG(151)	IEDYQPQALAILGKQAYEQGFSQR(14)-VSLEKLVEAYR(5)	55	2.73e-11			√	√	14.3661
827	ODO2(94)-ODO2(85)	SEEKASTPAQR(4)-EGNSAGKETSAK(7)	55	1.31e-08	√				n.a.
828	EFG(602)-EFG(507)	LAASIAFKEGFK(8)-HAKQSGGR(3), LAASIAFKEGFKK(8)-HAKQSGGR(3)	54	1.34e-14			√	√	16.4035
829	RS2(105)-RS2(143)	WLGGMLTNWKTVR(10)-ELEKLENSLGGIK(4)	54	5.08e-14			√	√	17.4877
830	G6PD(344)-G6PD(25)	LPTKCSEVVVYFK(4)-KLLPSLYQLEK(1)	54	1.05e-11					n.a.
831	RS3(86)-RS3(79)	GEDVEKLR(6)-PGIVIGKK(7)	54	3.21e-11			√	√	9.97762
832	G3P1(213)-G3P1(192)	GASQNIIPSSTGAAKAVGK(15)-TVDGPSHKDWR(8)	54	2.86e-10	√		√	√	19.8023
833	RBSB(101)-RBSB(119)	ILLINPTDSDAVGNAVKMANQANIPVITLDR(17)-QATKGEVVSHIASDNVLGGK(4)	53	6.35e-17	√		√	√	7.89577
834	RL19(87)-RL19(63)	VFQTHSPVVDSISVKR(15)-KISNGEGVER(1)	53	1.72e-13	√		√	√	12.2028
835	HNS(32)-HNS(57)	ECTLETLEEMLEKLEVVVNER(13)-KLQQYR(1)	53	5.24e-13					n.a.
836	RS10(30)-RS10(11)	LIDQATAEIVETAKR(14)-LKAFDHR(2)	53	4.4e-12			√	√	18.234
837	ODP2(317)-ODP2(410)	AEGKSEFAENDAYVHATPLIR(4)-IQKISGANLSR(3)	53	1.43e-11					n.a.
838	GLPQ(140)-GLPQ(128)	FPMGKSDFR(5)-KVQTYPGR(1)	53	3.73e-11			√	√	13.8231
839	RS10(82)-RS10(30)	LVDIVEPTEKTVDALMR(10)-LIDQATAEIVETAKR(14)	53	2.83e-09	√		√	√	8.50304
840	RL2(183)-RL2(207)	KVEADCR(1)-VLGKAGAAR(4)	53	1.89e-08	√		√		30.6198
841	PFLB(162)-PFLB(456)	KSGVLTGLPDAYGR(1)-LKMQVGPK(2)	53	2.13e-07			√	√	11.4506
842	FRDA(281)-FRDA(121)	NKYMELGPR(2)-FGGMKIER(5)	53	3.33e-06			√	√	8.61201
843	ODP2(317)-ODP2(346)	AEGKSEFAENDAYVHATPLIR(4)-EFGVNLAKVK(8)	52	3.14e-10					n.a.
844	PYRE(103)-PYRE(26)	EAKDHGEGGNLVGSALQGR(3)-FGEFTLKSGR(7)	52	1.39e-09			√	√	15.6245
845	EFTS(222)-EFTS(214)	KFTGEVSLTGQPFVMEPSK(1)-EIAEKMVEGR(5)	52	2.77e-09			√	√	12.1425
846	SYK2(82)-SYK2(2)	IMGKASFVTLQDVGGR(4)-SEQETR(1)	52	3.49e-09					n.a.
847	RS4(22)-RS4(77)	EGTDLFLKSGVR(8)-NYYKEAAR(4)	52	8.75e-09			√		28.9412
848	GPMA(248)-GPMA(39)	AAAVANQGKAK(9)-GVSEAKAAGK(6)	51	2.56e-10			√		23.4237
849	FKBA(92)-FKBA(42)	SKLSDQEIEQTLQAFEAR(2)-AAFKNDDQK(4)	51	2.8e-10			√	√	13.3189
850	KPYK2(115)-KPYK2(102)	VGIDYKGLPADVVPGDILLLDDGR(6)-FLLDANLGKGEGDKEK(9)	51	3.08e-10					n.a.
851	MURD(421)-MURD(46)	VQPGDMVLLSPACASLDQFKNFEQR(20)-MTPPGLDKLPEAVER(8)	51	9.39e-09			√	√	15.2208
852	ATPF(69)-ATPF(66)	AKAEAQVIIEQANKR(2)-ASATDQLKK(8), AKAEAQVIIEQANK(2)-ASATDQLKK(8)	51	4.25e-08			√	√	5.18391
853	ODO1(589)-ODO1(576)	QAMAAGEKLFDWGGAENLAYATLVDEGIPVR(8)-VAKIYGDR(3)	51	5.09e-07			√	√	13.4577
854	KPYK2(115)-KPYK2(75)	VGIDYKGLPADVVPGDILLLDDGR(6)-HVAILGDLQGPKIR(12)	50	1e-14					n.a.
855	SKP(39)-SKP(158)	IAIVNMGSLFQQVAQKTGVSNTLENEFK(16)-DITADVLKQVK(8)	50	8.4e-12			√	√	9.98221
856	CARB(423)-CARB(366)	VSLDDPEALTKIR(11)-FNFEKFAGANDR(5)	50	2.65e-11			√	√	21.9262
857	FIS(25)-FIS(1)	VNSDVLTVSTVNSQDQVTQKPLR(20)-MFEQR(1)	50	5.95e-11			√		23.4587
858	SYM(597)-SYM(677)	VALIENAEFVEGSDKLLR(15)-PGHQVK(6), VALIENAEFVEGSDKLLR(15)-DIFLLSPDAGAKPGHQVK(18)	50	2.34e-07					n.a.
859	UPP(116)-UPP(148)	NEETLEPVPYFQKLVSNIDER(13)-KAGCSSIK(1)	50	5.1e-07	√		√	√	13.0555
860	DAPD(241)-DAPD(263)	VPAGSVVVSGNLPSKDGK(15)-GKVGINELLR(2)	49	4.95e-12					n.a.
861	RNB(107)-RNB(89)	LAIVPDHPLLKDAIPCR(11)-FVGKVQGK(4)	49	1.1e-10			√	√	11.0351
862	GLYA(293)-GLYA(375)	TYQQQVAKNAK(8)-GFKEAEAK(3)	49	5.06e-09	√		√	√	8.09444
863	TIG(83)-TIG(146)	EKINPAGAPTYVPGEYK(2)-KQQATWK(1)	49	1.15e-08			√		54.498
864	DAPD(263)-DAPD(85)	GKVGINELLR(2)-YFDKVPMK(4)	49	1.15e-08					n.a.
865	SYW(58)-SYW(55)	KATLDTLALYLACGIDPEK(1)-QDAQKLR(5)	49	2.9e-05					n.a.
866	AROA(411)-AROA(22)	CTAKTFPDYFEQLAR(4)-VDGTINLPGSKSVSNR(11)	48	4.41e-16			√	√	9.05825
867	HIS8(312)-HIS8(326)	ASSAVFKSLWDQGIILR(7)-DQNKQPSLSGCLR(4)	48	5.48e-13			√	√	14.6781
868	TIG(83)-TIG(361)	EKINPAGAPTYVPGEYK(2)-TNELKADEER(5)	48	2.96e-10			√		22.2274
869	DBHB(18)-DBHB(3)	IAAGADISKAAAGR(9)-MNKSQLIDK(3)	48	1.07e-08			√	√	11.6333
870	ENGB(50)-ENGB(57)	SSALNTLTNQKSLAR(11)-TSKTPGR(3)	48	2.3e-07					n.a.
871	EFTU1(10)-EFTU1(5),EFTU2(10)-EFTU2(5)	TKPHVNVGTIGHVDHGK(2)-EKFER(2)	48	1.95e-06			√	√	6.72168
872	SYN(286)-SYN(294)	ADDMKFFAER(5)-VDKDAVSR(3)	48	3.88e-06	√				n.a.
873	RS9(2)-RS9(13)	AENQYYGTGR(1)-KSSAAR(1)	48	5.69e-06	√		√		24.1931
874	GATR(217)-GATR(86)	VIAVLDSSKFNR(9)-FQLASAPKNR(8)	47	6.95e-18					n.a.
875	YGGN(115)-YGGN(122)	IIVQEMGESSKMR(11)-LTKLDAQLK(3)	47	1.89e-15					n.a.
876	KBL(90)-KBL(258)	FICGTQDSHKELEQK(10)-KEVVEWLR(1)	47	3.61e-14			√	√	13.4545
877	RL9(112)-RL9(35)	DIADAVTAAGVEVAKSEVR(15)-NFLVPQGKAVPATK(8)	47	1.72e-13			√	√	13.6566
878	SYY(90)-SYY(144)	KLNTEETVQEWVDK(1)-DIGKHFSVNQMINK(4)	47	6.87e-13			√	√	9.51301
879	EFG(485)-EFG(440)	EFNVEANVGKPQVAYR(10)-LAKEDPSFR(3)	47	7.18e-13			√	√	21.0053
880	TIG(361)-TIG(392)	TNELKADEER(5)-NKELMDNMR(2)	47	1.48e-12	√		√	√	15.8438
881	CARB(1006)-CARB(993)	IKNGEYTYIINTTSGR(2)-LVNKVHEGRPHIQDR(4), IKNGEYTYIINTTSGR(2)-LVNKVHEGR(4)	47	1.78e-11			√	√	13.411
882	ACON2(759)-ACON2(722)	MDAAQLTEEGYYSVFGKSGAR(17)-AAGKLLDAHK(4)	47	2.22e-09	√		√	√	12.6511
883	PANC(181)-PANC(199)	AKDGLALSSR(2)-KIAPGLYK(1)	47	5.46e-09			√	√	12.2089
884	RNE(189)-RNE(196)	LKHWEAIK(2)-KAAESR(1)	47	4.54e-08			√	√	10.509
885	RL1(141)-RL1(157)	GLMPNPKVGTVTPNVAEAVK(7)-NAKAGQVR(3)	47	1.39e-07			√	√	16.3575
886	RPOB(1200)-RPOB(1127)	ELLKLGDLPTSGQIR(4)-GIGDKINAMLK(5)	47	7.3e-07			√	√	10.8998
887	EFTS(25)-EFTS(43)	KALTEANGDIELAIENMR(1)-KSGAIK(1)	47	4.01e-06			√	√	12.9569
888	RS3(38)-RS3(45)	EFADNLDSDFKVR(11)-QYLTKELAK(5)	46	5.03e-14			√	√	9.93404
889	NAGB(14)-NAGB(264)	LIPLTTAEQVGKWAAR(12)-YFNELEAENIKGL(11)	46	1.23e-10			√	√	10.1498
890	RPIA(121)-RPIA(7)	FICIADASKQVDILGK(9)-MTQDELKK(7)	46	1.78e-08			√	√	11.012
891	PFLB(235)-PFLB(2)	ALGQMKEMAAK(6)-SELNEK(1)	46	9.17e-07			√		22.4176
892	EFTU1(264)-EFTU1(5),EFTU2(264)-EFTU2(5)	KLLDEGR(1)-EKFER(2)	46	2.26e-06	√		√	√	4.32122
893	RL10(37)-RL10(105)	GVTVDKMTELR(6)-ANAKFEVK(4)	46	3.62e-06	√		√	√	10.6262
894	K1PF(41)-K1PF(185)	TTGLHAAGKGINVAK(9)-AAPWLVKPNR(7)	45	1.07e-21					n.a.
895	RS21(25)-RS21(40)	SCEKAGVLAEVR(4)-EFYEKPTTER(5)	45	6.18e-12			√	√	12.3389
896	PNP(571)-PNP(628)	IKDVIGKGGSVIR(7)-VYTGKVTR(5), DVIGKGGSVIR(5)-VYTGKVTR(5)	45	1.42e-10					n.a.
897	FIS(25)-FIS(32)	VNSDVLTVSTVNSQDQVTQKPLR(20)-DSVKQALK(4)	45	1.71e-10			√	√	11.5238
898	GRPE(90)-GRPE(82)	FALEKFINELLPVIDSLDR(5)-TELDIEKAHK(7), FALEKFINELLPVIDSLDR(5)-RTELDIEKAHK(8)	45	2.62e-07			√	√	12.3264
899	NFNB(122)-NFNB(119)	KFFADMHR(1)-AANDKGR(5)	45	7.51e-07			√	√	4.83186
900	PCKA(288)-PCKA(390)	LIGDDEHGWDDDGVFNFEGGCYAKTIK(24)-LTADQTQYHFLSGFTAKLAGTER(17)	44	5.17e-19			√	√	13.7615
901	IPYR(116)-IPYR(147)	LSKEYDHIKDVNDLPELLK(3)-DLEKGK(4), LSKEYDHIKDVNDLPELLK(3)-AQIAHFFEHYKDLEKGK(15), LSKEYDHIK(3)-AQIAHFFEHYKDLEKGK(15)	44	9.98e-16			√	√	10.1141
902	ATPB(99)-ATPB(82)	IMNVLGEPVDMKGEIGEEER(12)-DLEHPIEVPVGKATLGR(12)	44	3.81e-14					n.a.
903	RL29(9)-RL29(54)	EKSVEELNTELLNLLR(2)-VKTLLNEK(2)	44	6.19e-07			√	√	10.2077
904	AMPA(134)-AMPA(1)	QAVETAKETLYSFDQLK(7)-MEFSVK(1)	44	6.56e-07			√	√	7.51305
905	CARB(412)-CARB(366)	GLEVGATGFDPKVSLDDPEALTK(12)-FNFEKFAGANDR(5)	44	1.72e-06			√	√	19.2953
906	TIG(287)-TIG(279)	VKSQAIEGLVK(2)-ELKSAIR(3)	44	3.94e-05			√	√	11.8025
907	GPMA(106)-GPMA(248)	AETAEKYGDEQVK(6)-AAAVANQGKAK(9)	43	4.07e-18			√	√	19.446
908	ODP1(724)-ODP1(866)	LETIEGSKGK(8)-KVVADAIAK(1)	43	1.84e-14			√	√	14.9626
909	NUOF(316)-NUOF(243)	AWQPGGAGTDFLTEAHLDLPMEFESIGKAGSR(28)-SKDAGTK(2)	43	2.99e-11					n.a.
910	EFTS(24)-EFTS(2)	TGAGMMDCKK(9)-AEITASLVK(1)	43	6.17e-11			√	√	9.3066
911	RL9(112)-RL9(89)	DIADAVTAAGVEVAKSEVR(15)-AGDEGKLFGSIGTR(6)	43	1.51e-10			√	√	15.5799
912	RNR(86)-RNR(148)	LDLVKGTVIGHR(5)-VLVPKTSQIVGR(5)	43	1.59e-10					n.a.
913	PYRG(479)-PYRG(432)	YEVNNMLLKQIEDAGLR(9)-SEKSDLGGTMR(3)	43	5.5e-10					n.a.
914	MDH(312)-MDH(134)	DIALGEEFVNK(11)-KAGVYDK(1)	43	6.2e-10			√	√	12.8125
915	TALB(294)-TALB(301)	ITESEFLWQHNQDPMAVDKLAEGIR(19)-KFAIDQEK(1)	43	6.25e-10			√	√	10.2585
916	IF2(157)-IF2(173)	EAAEKDKVSNQQDDMTK(7)-NAQAEKAR(6), DKVSNQQDDMTK(2)-NAQAEKAR(6)	43	2.92e-09					n.a.
917	EFG(532)-EFG(555)	GQYGHVVIDMYPLEPGSNPKGYEFINDIK(20)-GGVIPGEYIPAVDKGIQEQLK(14)	42	4.79e-18			√	√	13.4017
918	YPFJ(103)-YPFJ(182)	MGKTYQQPK(3)-LLGIEPKVR(7)	42	6.37e-13					n.a.
919	ODO1(476)-ODO1(479)	HGHNEADEPSATQPLMYQKIK(19)-KHPTPR(1)	42	3.22e-12					n.a.
920	TIG(1)-TIG(81)	MQVSVETTQGLGR(1)-NFIDAIIKEK(8)	42	7.86e-12	√		√	√	10.9677
921	SYGA(250)-SYGA(262)	ILKAAHSFNLLDAR(3)-KAISVTER(1)	42	5.03e-11					n.a.
922	RL1(141)-RL1(54)	GLMPNPKVGTVTPNVAEAVK(7)-KSDQNVR(1)	42	7.08e-11			√	√	9.72434
923	RS9(2)-RS9(100)	AENQYYGTGR(1)-KAGFVTR(1)	42	5.26e-10	√		√	√	21.4122
924	EFTU1(209)-EFTU1(10),EFTU2(209)-EFTU2(10)	AIDKPFLLPIEDVFSISGR(4)-TKPHVNVGTIGHVDHGK(2)	42	8.39e-10			√	√	9.74844
925	YAJC(58)-YAJC(104)	LMDSIAKGDEVLTNGGLVGR(7)-DFVAAVLPKGTMK(9)	42	3.05e-09					n.a.
926	CH60(272)-CH60(226)	GIVKVAAVK(4)-KISNIR(1)	42	1.32e-08	√		√	√	11.8809
927	ACON2(835)-ACON2(722)	LPTPEEYQTYVAQVDKTAVDTYR(16)-AAGKLLDAHK(4)	42	1.93e-08			√	√	10.9254
928	EFG(609)-EFG(497)	AKPVLLEPIMK(2)-QKVTDVEGK(2)	42	1.61e-07			√	√	6.77339
929	SYT(614)-SYT(638)	GKDLGSMDVNEVIEK(2)-SLKQLEE(3), RGKDLGSMDVNEVIEK(3)-SLKQLEE(3)	42	3.68e-05	√		√	√	12.7138
930	MENB(98)-MENB(54)	GDYGGYKDDSGVHHLNVLDFQR(7)-NAFRPLTVKEMIQALADAR(9), GDYGGYKDDSGVHHLNVLDFQR(7)-PLTVKEMIQALADAR(5)	41	8.2e-19			√	√	12.7038
931	EFTU1(253)-EFTU1(295),EFTU2(253)-EFTU2(295)	ETQKSTCTGVEMFR(4)-GQVLAKPGTIKPHTK(6)	41	2.59e-15	√		√	√	9.0985
932	RHO(385)-RHO(417)	KIIHPMGEIDAMEFLINK(1)-TNDDFFEMMKR(10)	41	2.21e-14			√	√	13.6457
933	EFTU1(209)-EFTU1(264),EFTU2(209)-EFTU2(264)	AIDKPFLLPIEDVFSISGR(4)-KLLDEGR(1)	41	5.44e-10	√		√		24.0401
934	IMDH(396)-IMDH(110)	GMGSLGAMSKGSSDR(10)-EVKELTER(3)	41	2.64e-08					n.a.
935	NRDR(138)-NRDR(53)	SFEDIKEFGEEIAR(6)-VVKSNDVR(3)	41	9.09e-08					n.a.
936	EFTU1(57)-EFTU1(5),EFTU2(57)-EFTU2(5)	AFDQIDNAPEEKAR(12)-EKFER(2)	41	3.54e-07			√	√	21.0653
937	PHSM(9)-PHSM(9)	SQPIFNDKQFQEALSR(8)-SQPIFNDKQFQEALSR(8)	41	6.74e-07			√	√	0
938	RS1(528)-RS1(450)	AKDEADEKDAIATVNK(8)-KGAIVTGK(1)	40	1.97e-12			√	√	0.477145
939	FUMC(430)-FUMC(426)	AHKEGLTLK(3)-AAEIAKK(6)	40	1.78e-11	√		√	√	5.90757
940	RS15(2)-RS15(48)	SLSTEATAK(1)-KDHHSR(1)	40	1.94e-11			√	√	16.9756
941	EFTU1(249)-EFTU1(264),EFTU2(249)-EFTU2(264)	VGEEVEIVGIKETQK(11)-KLLDEGR(1)	40	4.9e-11			√	√	18.2139
942	GLYA(354)-GLYA(331)	NSVPNDPKSPFVTSGIR(8)-NLTGKEADAALGR(5)	40	5.94e-10			√	√	10.2352
943	RS2(45)-RS2(28)	VHIINLEKTVPMFNEALAELNK(8)-MKPFIFGAR(2)	40	3.43e-08			√	√	9.56612
944	NFNB(14)-NFNB(119)	HSTKAFDASK(4)-AANDKGR(5)	40	6.69e-06			√	√	17.0363
945	ODP2(313)-ODP2(410)	AEAPAAAPAAKAEGK(11)-IQKISGANLSR(3)	39	1.07e-17					n.a.
946	FKBA(263)-FKBA(110)	ADAKPEADAKAADSAK(10)-VKSSAQAK(2)	39	1.02e-13					n.a.
947	CPDB(580)-CPDB(354)	SVLAAWIADESKR(12)-QFVSKPIGK(5)	39	8.38e-10					n.a.
948	RPOB(1242)-RPOB(1073)	LNHLVDDKMHAR(8)-HGNKGVISK(4)	39	1.33e-09			√	√	16.8515
949	ARGD(402)-ARGD(2)	FAHAVAKVVGA(7)-AIEQTAITR(1)	39	1.35e-09					n.a.
950	SYA(232)-SYA(56)	QADGTMEPLPKPSVDTGMGLER(11)-DVFLGLDKR(8)	39	5.94e-09			√	√	11.4699
951	PANC(206)-PANC(181)	IAPGLYKVLSSIADK(7)-AKDGLALSSR(2)	39	9.24e-09			√	√	12.6573
952	SYL(813)-SYL(707)	AKITVPVDATEEQVR(2)-DVHKTIAK(4)	39	3.78e-08			√	√	21.2304
953	RHO(181)-RHO(348)	GLIVAPPKAGK(8)-KIAEK(1)	39	1.59e-06			√	√	9.60117
954	SYT(200)-SYT(213)	LMKTAGAYWR(3)-GDSNNKMLQR(6)	39	8.52e-06			√	√	19.3754
955	F16PA(42)-F16PA(72)	DINKAGLVDILGASGAENVQGEVQQK(4)-LDLFANEKLK(8)	39	2.53e-05			√	√	17.048
956	RL14(1)-RL14(23)	MIQEQTMLNVADNSGAR(1)-VMCIKVLGGSHR(5)	38	2.92e-16			√	√	6.28598
957	NUOCD(161)-NUOCD(183)	IMMPQTWKGHPLR(8)-ATEFSPFELTKAK(11)	38	2.21e-15					n.a.
958	RS7(76)-RS7(149)	SELEAFEVALENVRPTVEVKSR(20)-MAEANKAFAHYR(6)	38	2.34e-09			√	√	8.55326
959	RL10(37)-RL10(2)	GVTVDKMTELR(6)-ALNLQDK(1)	38	6.7e-09			√		23.6065
960	PFLB(143)-PFLB(136)	KTHNQGVFDVYTPDILR(1)-KIFTEYR(1)	38	3.7e-08			√	√	10.2853
961	RL16(127)-RL16(118)	LPIKTTFVTK(4)-EAFKLAAAK(4)	38	4e-07			√	√	8.74094
962	RS10(82)-RS10(1)	LVDIVEPTEKTVDALMR(10)-MQNQR(1)	38	4.87e-07	√		√	√	11.9643
963	PFLB(143)-PFLB(162)	KTHNQGVFDVYTPDILR(1)-KSGVLTGLPDAYGR(1)	37	2.84e-22			√		23.9965
964	SYH(65)-SYH(53)	AIGEVTDVVEKEMYTFEDR(11)-LPIVEQTPLFKR(11)	37	1.97e-08			√	√	11.5219
965	EFG(430)-EFG(440)	ADQEKMGLALGR(5)-LAKEDPSFR(3)	37	5.49e-06			√	√	15.3744
966	RL1(105)-RL1(54)	AAGAELVGMEDLADQIKK(17)-KSDQNVR(1)	36	1.49e-16			√	√	15.6094
967	HEM2(292)-HEM2(217)	FAALAGAIDEEKVVLESLGSIK(12)-KSYQMNPMNR(1)	36	1.65e-15			√	√	13.8072
968	RS2(81)-RS2(143)	AASEAVKDAALSCDQFFVNHR(7)-ELEKLENSLGGIK(4)	36	7.98e-14			√	√	14.2595
969	RPOB(1158)-RPOB(1)	QKVDLSTFSDEEVMR(2)-MVYSYTEK(1)	36	2.76e-13	√				n.a.
970	RL3(190)-RL3(160)	NLLLVKGAVPGATGSDLIVKPAVK(6)-KMAGQMGNER(1)	36	1.6e-12			√		29.4281
971	FTSH(387)-FTSH(391)	VVSMVEFEKAK(9)-DKIMMGAER(2)	36	7.98e-10					n.a.
972	RS3(89)-RS3(108)	KVVADIAGVPAQINIAEVR(1)-KPELDAK(1)	36	9.03e-10			√		27.0195
973	RS2(128)-RS2(132)	LKDLETQSQDGTFDKLTK(15)-KEALMR(1), DLETQSQDGTFDKLTK(13)-KEALMR(1)	36	1.58e-08			√	√	6.06145
974	TRXB(321)-TRXB(185)	YLDGLADAK(9)-AEKILIK(3)	36	3.57e-07			√	√	19.013
975	RS8(108)-RS8(89)	VMAGLGIAVVSTSKGVMTDR(14)-KDELPK(1)	36	3.94e-07			√	√	11.9315
976	GTPC1(153)-GTPC1(153)	KPLWCGDTGPEVVQR(1)-KPLWCGDTGPEVVQR(1)	35	2.42e-18			√	√	0
977	PCKA(390)-PCKA(91)	LTADQTQYHFLSGFTAKLAGTER(17)-GKNDNKPLSPETWQHLK(2)	35	2.43e-15			√	√	15.3076
978	UPP(67)-UPP(70)	VTIEGWNGPVEIDQIKGK(16)-KITVVPILR(1)	35	5.22e-14	√		√	√	8.13582
979	PNP(690)-PNP(657)	LSIKEATEQSQPAAAPEAPAAEQGE(4)-EGLVHISQIADKR(12)	35	2.65e-13			√	√	11.8589
980	PYRI(94)-PYRI(2)	IDNYEVVGKSR(9)-THDNK(1), IDNYEVVGKSRPSLPER(9)-THDNK(1)	35	2.8e-13			√	√	12.4068
981	FKBA(179)-FKBA(127)	GTLIDGKEFDNSYTR(7)-DAADNEAKGK(8)	35	3.51e-13			√	√	14.303
982	SYL(813)-SYL(711)	AKITVPVDATEEQVR(2)-TIAKVTDDIGR(4)	35	3.32e-11			√		23.7527
983	EFG(153)-EFG(507)	MGANFLKVVNQIK(7)-HAKQSGGR(3)	35	1.45e-10			√		87.2283
984	GRCA(92)-GRCA(62)	HPEKYPQLTIR(4)-EVPVEVKPEVR(7)	35	4.56e-10					n.a.
985	ACP(10)-ACP(1)	KIIGEQLGVK(1)-MSTIEER(1)	35	4.81e-10	√		√	√	13.1411
986	EFG(423)-EFG(430)	MEFPEPVISIAVEPKTK(15)-ADQEKMGLALGR(5)	35	1.86e-09			√	√	10.9821
987	SYP(547)-SYP(554)	NLDNDDIEYKYR(10)-NGEKQLIK(4)	35	2.24e-09					n.a.
988	EFG(497)-EFG(507)	QKVTDVEGK(2)-HAKQSGGR(3)	35	4.15e-09			√		29.8013
989	RS9(2)-RS9(22)	AENQYYGTGR(1)-VFIKPGNGK(4)	35	9.24e-09	√		√	√	9.69356
990	SYK2(82)-SYK2(114)	IMGKASFVTLQDVGGR(4)-DSLPEGVYNDQFKK(13)	34	3.95e-18			√	√	9.93546
991	RNR(105)-RNR(544)	KDDLYLSSEQMK(1)-SMKQAIYDPENR(3)	34	1.11e-16					n.a.
992	PFLB(117)-PFLB(107)	ALIPFGGIKMIEGSCK(9)-IVGLQTEAPLKR(11)	34	6.43e-13			√	√	19.7446
993	SKP(85)-SKP(75)	TKLEKDVMAQR(5)-LQSMKAGSDR(5), LEKDVMAQR(3)-LQSMKAGSDR(5)	34	8.89e-12			√	√	10.2332
994	NUOCD(392)-NUOCD(385)	LASYEKAALQNTILK(6)-EFLDWMPKR(8)	34	4.53e-11					n.a.
995	NRDD(245)-NRDD(242)	KTAEEWNIPDAEGYANSR(1)-IDEVLAPFVTASYNKHR(15)	34	1.74e-10					n.a.
996	EFG(440)-EFG(159)	LAKEDPSFR(3)-VVNQIKTR(6)	34	5.02e-10			√		38.3753
997	PTA(419)-PTA(685)	TVKAAAICAER(3)-KPVNDLSR(1)	34	4.57e-09					n.a.
998	DNAK(502)-DNAK(155)	ITIKASSGLNEDEIQK(4)-QATKDAGR(4)	34	8.16e-08			√	√	20.5558
999	CH60(207)-CH60(272)	GYLSPYFINKPETGAVELESPFILLADK(10)-GIVKVAAVK(4), GYLSPYFINKPETGAVELESPFILLADKK(10)-GIVKVAAVK(4)	34	2.77e-06			√	√	9.50226
1000	PROQ(75)-PROQ(107)	YLYGVKPGATR(6)-KQLEEAKAR(7), YLYGVKPGATR(6)-QLEEAKAR(6)	33	6.87e-14					n.a.
1001	CH10(74)-CH10(1)	VGDIVIFNDGYGVKSEK(14)-MNIRPLHDR(1)	33	2.97e-11			√	√	17.5821
1002	RL22(49)-RL22(42)	KVLESAIANAEHNDGADIDDLK(1)-KAAVLVK(1)	33	8.38e-11			√	√	10.5407
1003	EFTU1(314)-EFTU1(300),EFTU2(314)-EFTU2(300)	FESEVYILSKDEGGR(10)-PGTIKPHTK(5)	33	1.26e-10			√		34.788
1004	RS1(536)-RS1(450)	DAIATVNKQEDANFSNNAMAEAFK(8)-KGAIVTGK(1)	33	1.46e-10					n.a.
1005	LIPA(44)-LIPA(37)	IKLPADSTR(2)-KPEWMK(1)	33	1.59e-10					n.a.
1006	FPG(255)-FPG(240)	VCGTPIVATKHAQR(10)-KGEPCR(1)	33	1.25e-08	√		√	√	11.947
1007	HTPG(199)-HTPG(229)	SIISKYSDHIALPVEIEK(5)-INKAQALWTR(3)	33	1.6e-08			√	√	11.4359
1008	GSHR(282)-GSHR(199)	TNEKGYIVVDK(4)-KHAPLR(1)	33	6.9e-08			√		22.4467
1009	HLDE(431)-HLDE(384)	LIAGILPDLLVKGGDYKPEEIAGSK(12)-LKGDSRPVNPLEQR(2), LIAGILPDLLVKGGDYKPEEIAGSK(12)-LKGDSR(2)	33	1.97e-07					n.a.
1010	ODP1(210)-ODP1(218)	FLKYLEHR(3)-GLKDTSK(3)	33	6.63e-06			√	√	9.10496
1011	GLMM(314)-GLMM(305)	YVLEKMQEK(5)-AKVGDR(2)	33	9.37e-06					n.a.
1012	RS1(504)-RS1(450)	DRVEDATLVLSVGDEVEAKFTGVDR(19)-KGAIVTGK(1), VEDATLVLSVGDEVEAKFTGVDR(17)-KGAIVTGK(1)	32	6.29e-13			√	√	8.35825
1013	RHO(283)-RHO(283)	AYNTVVPASGKVLTGGVDANALHRPK(11)-AYNTVVPASGKVLTGGVDANALHRPK(11)	32	4.14e-11			√	√	0
1014	ALF(72)-ALF(327)	APVIVQFSNGGASFIAGKGVK(18)-KYYDPR(1)	32	1.53e-10			√	√	16.9182
1015	KAD(157)-KAD(40)	KDDQEETVR(1)-AAVKSGSELGK(4)	32	2.02e-10			√	√	11.4129
1016	TIG(361)-TIG(287)	TNELKADEER(5)-VKSQAIEGLVK(2)	32	2.42e-10			√	√	16.8611
1017	UPP(116)-UPP(70)	NEETLEPVPYFQKLVSNIDER(13)-KITVVPILR(1)	32	4.48e-10			√	√	16.2726
1018	G3P1(124)-G3P1(115)	VVMTGPSKDNTPMFVK(8)-HITAGAKK(7)	32	7.2e-10			√	√	20.6405
1019	SYM(597)-SYM(529)	VALIENAEFVEGSDKLLR(15)-VNPFKALYNR(5)	32	2.68e-08					n.a.
1020	G3P1(213)-G3P1(225)	GASQNIIPSSTGAAKAVGK(15)-VLPELNGKLTGMAFR(8)	32	2.07e-07			√	√	7.75219
1021	EFTS(167)-EFTS(182)	GADEELVKHIAMHVAASK(8)-PEFIKPEDVSAEVVEK(5)	32	1.52e-06			√	√	18.4703
1022	ISCU(103)-ISCU(2)	NTDIAEELELPPVKIHCSILAEDAIK(14)-AYSEK(1)	32	3.07e-06			√	√	19.5268
1023	YBBO(207)-YBBO(48)	FTDNVNQTQSDKPVENPGIAAR(12)-KPDDVER(1)	31	1.11e-13					n.a.
1024	TYPA(337)-TYPA(59)	LNKELVHNVALR(3)-GITILAKNTAIK(7)	31	1.74e-12					n.a.
1025	PYRI(60)-PYRI(1)	DLIKIENTFLSEDQVDQLALYAPQATVNR(4)-MTHDNK(1)	31	1.39e-11			√	√	8.47545
1026	LPP(75)-LPP(75)	LDNMATKYR(7)-LDNMATKYR(7)	31	5.44e-11			√	√	0
1027	DNAK(359)-DNAK(351)	VAEFFGKEPR(7)-MPMVQKK(6)	31	6.24e-11			√	√	9.79116
1028	G3P1(116)-G3P1(108)	KVVMTGPSK(1)-KHITAGAK(1)	31	3.4e-10			√	√	10.4433
1029	IF2(184)-IF2(186)	EQEAAELKR(8)-KAEEEAR(1), REQEAAELKR(9)-KAEEEAR(1)	31	4.11e-10					n.a.
1030	RNR(13)-RNR(2)	EAEKYANPIPSR(4)-SQDPFQER(1)	31	2.12e-09					n.a.
1031	ACON2(759)-ACON2(728)	MDAAQLTEEGYYSVFGKSGAR(17)-LLDAHKGQLPTR(6)	31	4.1e-09			√	√	7.90656
1032	ODP1(881)-ODP1(865)	FNIDADKVNPR(7)-RGEIDKK(6), FNIDADKVNPR(7)-GEIDKK(5)	31	1.65e-08			√	√	20.0089
1033	FENR(226)-FENR(233)	DTQQLLKETR(7)-QMTKHLR(4)	31	1.67e-08	√		√	√	7.86065
1034	MAK(11)-MAK(206)	IGIDLGGTKTEVIALGDAGEQLYR(9)-LSGHALKGSEIIR(7)	31	4.75e-08					n.a.
1035	SYM(597)-SYM(143)	VALIENAEFVEGSDKLLR(15)-FVKGTCPK(3)	31	1.43e-07					n.a.
1036	SYL(138)-SYL(146)	WEQKFFTELYK(4)-KGLVYK(1)	31	9.22e-07			√	√	12.4499
1037	SUCC(372)-SUCC(359)	LADSGLNIIAAKGLTDAAQQVVAAVEGK(12)-LEGNNAELGAKK(11)	31	6.64e-05			√	√	10.8598
1038	ATPB(82)-ATPB(230)	DLEHPIEVPVGKATLGR(12)-VALTGLTMAEKFR(11)	30	2.67e-12					n.a.
1039	IF2(157)-IF2(141),IF2(157)-IF2(149)	EAAEKDKVSNQQDDMTK(7)-EAAEQAKR(7), DKVSNQQDDMTK(2)-EAAEQAKR(7)	30	4.43e-11					n.a.
1040	ACON2(835)-ACON2(539)	LPTPEEYQTYVAQVDKTAVDTYR(16)-GKMQPGITLR(2)	30	5.94e-10			√	√	18.2439
1041	CLPX(188)-CLPX(192)	GIVYIDEIDKISR(10)-KSDNPSITR(1)	30	9.19e-09					n.a.
1042	RL1(141)-RL1(14)	GLMPNPKVGTVTPNVAEAVK(7)-EKVDATK(2)	30	5.59e-08			√		35.2226
1043	RL9(35)-RL9(42)	NFLVPQGKAVPATK(8)-KNIEFFEAR(1)	30	6.56e-08			√	√	13.1032
1044	RL3(1)-RL3(8)	MIGLVGK(1)-KVGMTR(1)	30	7.51e-08			√	√	19.9562
1045	KDSA(189)-KDSA(284)	KVSGNSPVIFDVTHALQCR(1)-GFEELDTSK(9)	30	1.29e-07			√	√	18.6502
1046	HTPG(506)-HTPG(516)	EAEKALTPFIDR(4)-VKALLGER(2)	30	2.46e-07			√	√	15.4207
1047	PYRI(143)-PYRI(137)	YCEKEFSHNVVLAN(4)-ANDIALKCK(7)	30	2.77e-07			√	√	5.07253
1048	DKSA(139)-DKSA(1)	PTADLCIDCKTLAEIR(10)-MQEGQNR(1), LEARPTADLCIDCKTLAEIR(14)-MQEGQNR(1)	30	8.63e-07					n.a.
1049	EFTS(281)-EFTS(43)	VETDFAAEVAAMSKQS(14)-KSGAIK(1)	30	1.2e-06			√		37.3581
1050	ENO(419)-ENO(405)	IEEALGEKAPYNGR(8)-VAKYNQLIR(3)	30	0.000305			√	√	19.2405
1051	RF3(47)-RF3(2)	VLLFGQAIQTAGTVKGR(15)-TLSPYLQEVAK(1)	29	5.42e-18					n.a.
1052	PNP(690)-PNP(675)	LSIKEATEQSQPAAAPEAPAAEQGE(4)-VTDYLQMGQEVPVKVLEVDR(14)	29	5.81e-18			√	√	7.16105
1053	SYP(513)-SYP(126)	KERPGVMFADMELIGIPHTIVLGDR(1)-NELSSYKQLPLNFYQIQTK(7)	29	4.08e-17					n.a.
1054	RL4(130)-RL4(137)	FSVEAPKTK(7)-LLAQKLK(5)	29	4.2e-15			√	√	9.19823
1055	CYDA(377)-CYDA(308)	YTPNVADATEAQIQQATKDSIPR(18)-SVDTPVIGLKELMVQHEER(10)	29	1.24e-14					n.a.
1056	FABI(205)-FABI(205)	KMLAHCEAVTPIR(1)-KMLAHCEAVTPIR(1)	29	4.11e-12			√	√	0
1057	RS10(59)-RS10(1)	FTVLISPHVNKDAR(11)-MQNQR(1)	29	2.39e-11			√		48.0319
1058	SYQ(318)-SYQ(2)	IGVTKQDNTIEMASLESCIR(5)-SEAEAR(1)	29	6.82e-11					n.a.
1059	RL7/12(82)-RL7/12(71)	GATGLGLKEAK(8)-VAVIKAVR(5)	29	9.67e-11			√	√	10.4958
1060	SURA(405)-SURA(134)	KFSEEAASWMQEQR(1)-KEMIISEVR(1)	29	2.52e-10			√		24.8949
1061	CARB(993)-CARB(366)	LVNKVHEGRPHIQDR(4)-FNFEKFAGANDR(5)	29	8.92e-10			√		28.3544
1062	TOP1(484)-TOP1(443)	FSEASLVKELEK(8)-KGDEDR(1)	29	1.07e-09			√		28.4896
1063	KBL(23)-KBL(258)	AEGLFKEER(6)-KEVVEWLR(1)	29	1.72e-08			√	√	15.1716
1064	PGK(49)-PGK(84)	ASLPTIELALKQGAK(11)-DKLSNPVR(2)	29	2.28e-08	√		√	√	14.4509
1065	CARB(412)-CARB(504)	GLEVGATGFDPKVSLDDPEALTK(12)-LAKLAGVR(3)	29	7.51e-07	√		√	√	13.9051
1066	TIG(279)-TIG(272)	ELKSAIR(3)-KNMER(1)	29	1.06e-06	√		√	√	10.4024
1067	RS16(46)-RS16(1)	VGFFNPIASEKEEGTR(11)-MVTIR(1)	29	2.89e-05			√		32.2533
1068	KAD(13)-KAD(157)	IILLGAPGAGKGTQAQFIMEK(11)-KDDQEETVR(1)	28	6.41e-16			√	√	18.5491
1069	DPS(140)-DPS(27)	AIGEAKDDDTADILTAASR(6)-KATVELLNR(1)	28	9.01e-15	√		√	√	11.0491
1070	GLRX4(101)-GLRX4(108)	GELQQLIKETAAK(8)-YKSEEPDAE(2)	28	2.59e-11	√		√	√	10.1418
1071	EFTU1(238)-EFTU1(295),EFTU2(238)-EFTU2(295)	GIIKVGEEVEIVGIK(4)-GQVLAKPGTIKPHTK(6)	28	1.08e-10			√	√	10.2701
1072	RNR(513)-RNR(488)	SVLAELGLELPGGNKPEPR(15)-IHDKPSTEAITSFR(4)	28	1.27e-08					n.a.
1073	SYV(342)-SYV(194)	KAVVAAVDALGLLEEIKPHDLTVPYGDR(1)-ESKGSMWHIR(3)	28	1.39e-08					n.a.
1074	FRDA(290)-FRDA(281)	DKVSQAFWHEWR(2)-NKYMELGPR(2)	28	4.21e-08			√	√	9.82862
1075	FUMC(8)-FUMC(426)	SEKDSMGAIDVPADK(3)-AAEIAKK(6)	28	2.27e-07	√		√		71.2224
1076	IF3(97)-IF3(125)	EIKFRPGTDEGDYQVK(3)-FLEEGDKAKITLR(9), EIKFRPGTDEGDYQVK(3)-AKITLR(2)	28	2.6e-07	√		√	√	8.21405
1077	RRF(15)-RRF(26)	MDKCVEAFK(3)-TQISKIR(5)	28	2.99e-07	√		√	√	17.0473
1078	RL7/12(71)-RL7/12(71)	VAVIKAVR(5)-VAVIKAVR(5)	28	6.26e-07			√	√	0
1079	SYQ(73)-SYQ(271)	FDDTNPVKEDIEYVESIK(8)-LNLEYTVMSKR(10)	27	2.75e-18			√	√	10.9884
1080	RPOC(953)-RPOC(992)	AAAESSIQVKNK(10)-TKESYK(2)	27	8.07e-10	√		√	√	8.45054
1081	PUR8(420)-PUR8(437)	VDAEGMKQFIDGLALPEEEK(7)-LKAMTPANYIGR(2)	27	2.5e-09			√	√	5.88532
1082	RPOD(462)-RPOD(493)	IPVHMIETINKLNR(11)-MLMPEDKIR(7)	27	2.73e-09			√	√	12.2247
1083	EFTU1(264)-EFTU1(264),EFTU2(264)-EFTU2(264)	KLLDEGR(1)-KLLDEGR(1)	27	1.56e-08			√	√	0
1084	RL36(32)-RL36(15)	VICSAEPKHK(8)-NCKIVK(3)	27	1.86e-08			√	√	12.3912
1085	RPOA(304)-RPOA(297)	SLTEIKDVLASR(6)-TPNLGKK(6)	27	1.66e-06	√		√	√	10.1583
1086	FKBA(227)-FKBA(110)	LVIPPELAYGKAGVPGIPPNSTLVFDVELLDVKPAPK(11)-VKSSAQAK(2)	27	3.91e-06			√	√	17.0801
1087	TYRB(277)-TYRB(21)	VLGQLKATVR(6)-FKEDPR(2)	27	6.51e-06			√	√	19.9502
1088	RNR(86)-RNR(33)	LDLVKGTVIGHR(5)-EKPASR(2)	27	1.78e-05					n.a.
1089	PNP(690)-PNP(661)	LSIKEATEQSQPAAAPEAPAAEQGE(4)-VEKVTDYLQMGQEVPVK(3)	26	2.9e-18			√	√	16.989
1090	RL1(141)-RL1(198)	GLMPNPKVGTVTPNVAEAVK(7)-KAKPTQAK(1)	26	8.35e-14			√	√	10.0215
1091	SYK1(2)-SYK1(114)	SEQHAQGADAVVDLNNELK(1)-DDLPEGVYNEQFKK(13)	26	1.81e-13					n.a.
1092	MENC(170)-MENC(194)	AWTPLKGQQFAK(6)-IAFLEEPCKTR(9)	26	3.35e-11			√	√	10.5752
1093	SYV(600)-SYV(593)	TEKQFPNGIEPHGTDALR(3)-TGNMMQPQLADKIR(12)	26	8.9e-11					n.a.
1094	IF2(184)-IF2(141),IF2(184)-IF2(149)	EQEAAELKR(8)-EAAEQAKR(7), REQEAAELKR(9)-EAAEQAKR(7)	26	1.8e-10	√				n.a.
1095	OPGG(142)-OPGG(75)	VLYPINSKDK(8)-AYWNNLKTPFK(7), VLYPINSKDKNDEIVSMLGASYFR(8)-AYWNNLKTPFK(7)	26	1.5e-09			√	√	13.4946
1096	ENO(360)-ENO(405)	MAKDAGYTAVISHR(3)-VAKYNQLIR(3)	26	3.87e-09			√		22.8724
1097	AMPA(80)-AMPA(147)	ILLIGCGKER(8)-TNKSEPR(3)	26	6.34e-09	√		√	√	16.5642
1098	FKBA(110)-FKBA(269)	VKSSAQAK(2)-AADSAKK(6)	26	2.2e-08					n.a.
1099	GUAA(307)-GUAA(309)	FLSALAGENDPEAKR(14)-KIIGR(1)	26	3.02e-08			√	√	5.30009
1100	NADC(186)-NADC(154)	LGLSDAFLIKENHIIASGSVR(10)-KTLPGLR(1)	26	3.88e-08					n.a.
1101	CH60(277)-CH60(226)	VAAVKAPGFGDR(5)-KISNIR(1)	26	2.04e-07			√	√	7.76463
1102	AMPP(102)-AMPP(2)	LGQDAAPEKLGVDR(9)-SEISR(1)	26	1.77e-06	√		√	√	18.3949
1103	KBL(362)-KBL(23)	EGIYVTGFFYPVVPKGQAR(15)-AEGLFKEER(6)	26	3.91e-05			√	√	14.402
1104	PTA(665)-PTA(685)	ATVFIFPDLNTGNTTYKAVQR(17)-KPVNDLSR(1)	25	2.6e-16					n.a.
1105	OPDA(303)-OPDA(582)	MAENPQQVLDFLTDLAKR(17)-KLVAVVPSPSWGR(1)	25	2.94e-16					n.a.
1106	PCKA(523)-PCKA(91)	LFIDNFDKYTDTPAGAALVAAGPK(8)-GKNDNKPLSPETWQHLK(2)	25	2.19e-15			√	√	9.89642
1107	SYM(466)-SYM(466)	YVDEQAPWVVAKQEGR(12)-YVDEQAPWVVAKQEGR(12)	25	3.05e-12			√	√	0
1108	PTH(118)-PTH(143)	LGGGHGGHNGLKDIISK(12)-IGIGHPGDKNK(9)	25	4.59e-12			√	√	17.0897
1109	ODO2(156)-ODO2(300)	APAKESAPAAAAPAAQPALAAR(4)-IKELAVK(2)	25	2.74e-10					n.a.
1110	SYV(3)-SYV(644)	MEKTYNPQDIEQPLYEHWEK(3)-NFCNKLWNASR(5)	25	4.54e-10					n.a.
1111	HEM2(292)-HEM2(213)	FAALAGAIDEEKVVLESLGSIK(12)-EAAGSALKGDR(8)	25	6.87e-10			√	√	16.1336
1112	MENB(89)-MENB(273)	AFCSGGDQKVR(9)-NAFNQKR(6)	25	9.11e-10			√	√	11.7117
1113	KPYK1(389)-KPYK1(382)	KYFPDATILALTTNEK(1)-LDAPLIVVATQGGKSAR(14)	25	9.86e-10			√	√	10.3485
1114	CAPP(693)-CAPP(676)	SATPEQELGKLPLGSR(10)-ENKDFVPYFR(3)	25	2.35e-09			√		24.3367
1115	ENO(325)-ENO(333)	IQLVGDDLFVTNTKILK(14)-EGIEKGIANSILIK(5)	25	3.94e-09			√	√	12.4651
1116	IF2(141)-IF2(141),IF2(141)-IF2(149),IF2(149)-IF2(141),IF2(149)-IF2(149)	EAAEQAKR(7)-EAAEQAKR(7)	25	5e-09	√				n.a.
1117	ACRA(78)-ACRA(175)	IAEVRPQVSGIILKR(14)-INLAYTKVTSPISGR(7)	25	9.63e-09			√	√	9.7332
1118	RPOA(95)-RPOA(1)	VQGKDEVILTLNK(4)-MQGSVTEFLKPR(1)	25	2.5e-08			√	√	11.1354
1119	GSH1(516)-GSH1(128)	QQEMEAADTEPFAVWLEKHA(18)-FKTLYR(2)	25	7.37e-08			√	√	14.6684
1120	RS9(100)-RS9(13)	KAGFVTR(1)-KSSAAR(1)	25	1.45e-07	√		√	√	18.75
1121	RS10(11)-RS10(1)	LKAFDHR(2)-MQNQR(1)	25	2.53e-06			√	√	9.99591
1122	PFLB(117)-PFLB(135)	ALIPFGGIKMIEGSCK(9)-ELDPMIKK(7)	25	5.7e-06			√	√	8.62829
1123	PHOL(331)-PHOL(281)	KAALAAER(1)-NTKSGLR(3)	25	1.95e-05	√				n.a.
1124	FUMA(426)-FUMA(463)	DHPIYYAGPAKTPEGYASGSLGPTTAGR(11)-MDSYVDQLQAQGGSMIMLAKGNR(20)	24	2.22e-18					n.a.
1125	GPMA(33)-GPMA(18)	FTGWYDVDLSEKGVSEAK(12)-HGESQWNKENR(8)	24	3.15e-15			√	√	10.1212
1126	GPMA(113)-GPMA(248)	YGDEQVKQWR(7)-AAAVANQGKAK(9)	24	3.58e-15			√	√	15.3991
1127	SUCC(295)-SUCC(360)	LHGGEPANFLDVGGGATKER(18)-KLADSGLNIIAAK(1)	24	1.8e-12	√		√	√	14.1648
1128	RS2(143)-RS2(73)	ELEKLENSLGGIK(4)-ILFVGTKR(7)	24	2.96e-12			√	√	10.54
1129	EFG(370)-EFG(375)	IVQMHANKR(8)-EEIKEVR(4)	24	1.07e-11	√		√	√	15.896
1130	RL2(97)-RL2(71)	SANIALVLYKDGER(10)-NKDGIPAVVER(2)	24	3.19e-10			√	√	9.05037
1131	EFG(485)-EFG(153)	EFNVEANVGKPQVAYR(10)-MGANFLKVVNQIK(7)	24	4.3e-10			√		42.2083
1132	FRSA(12)-FRSA(16)	TQANLSETLFKPR(11)-FKHPETSTLVR(2)	24	3.63e-08					n.a.
1133	IF3(164)-IF3(125)	VKDDLQELAVVESFPTKIEGR(17)-FLEEGDKAKITLR(9), VKDDLQELAVVESFPTKIEGR(17)-AKITLR(2)	24	1.41e-07			√	√	15.075
1134	RL1(54)-RL1(14)	KSDQNVR(1)-EKVDATK(2)	24	4.41e-07			√		26.5753
1135	FKBA(119)-FKBA(110)	MEKDAADNEAK(3)-VKSSAQAK(2)	24	1.18e-06			√	√	14.5078
1136	YIHD(77)-YIHD(61)	DYEEDFKTALLR(7)-DSAKDAVIPGLQK(4)	24	1.42e-06					n.a.
1137	EFG(323)-EFG(440)	HASDDEPFSALAFKIATDPFVGNLTFFR(14)-LAKEDPSFR(3)	24	1.82e-06			√	√	7.44575
1138	FABG(99)-FABG(119)	MKDEEWNDIIETNLSSVFR(2)-LSKAVMR(3)	24	4.15e-06			√	√	9.41915
1139	HTPG(362)-HTPG(354)	VLQMLEKLAK(7)-NALTKR(5)	24	2.02e-05			√	√	11.7913
1140	TDCE(620)-TDCE(166)	NAVPTQSILTITSNVVYGQKTGNTPDGR(20)-KSGVLTGLPDGYGR(1)	23	1.62e-13					n.a.
1141	GLPD(354)-GLPD(360)	APLLSVFGGKLTTYR(10)-KLAEHALEK(1)	23	4.41e-12			√	√	10.3834
1142	RNC(210)-RNC(35)	KAEQAAAEQALK(1)-SASSKHNER(5)	23	2.76e-11					n.a.
1143	PFLB(643)-PFLB(616)	DQKGAVASLTSVAK(3)-KTGNTPDGR(1)	23	5.08e-11			√		29.8902
1144	KAD(145)-KAD(40)	VEGKDDVTGEELTTR(4)-AAVKSGSELGK(4)	23	1.57e-10			√	√	20.2107
1145	EFG(153)-EFG(143)	MGANFLKVVNQIK(7)-IAFVNKMDR(6)	23	1.66e-09			√	√	11.5545
1146	SYS(17)-SYS(1)	NEPDAVAEKLAR(9)-MLDPNLLR(1)	23	2.5e-09					n.a.
1147	IMDH(72)-IMDH(396)	LAIALAQEGGIGFIHKNMSIER(16)-GMGSLGAMSKGSSDR(10)	23	2.72e-09					n.a.
1148	FUR(148)-FUR(117)	EDEHAHEGK(9)-EIAAKHGIR(5)	23	5.72e-09	√				n.a.
1149	ODO2(94)-ODO2(300)	SEEKASTPAQR(4)-IKELAVK(2)	23	2.49e-08					n.a.
1150	ODP1(375)-ODP1(368)	IYAAFKK(6)-GGHDPKK(6)	23	3.01e-08			√	√	10.4767
1151	NARH(400)-NARH(290)	IPVQYLANLLTAGDTKPVLR(16)-AASTENEKDLYQR(8)	23	1.2e-07			√	√	10.4814
1152	PYRH(68)-PYRH(212)	GAGLAKAGMNR(6)-DHKLPIR(3)	23	3.42e-06	√		√	√	17.4403
1153	GPMI(178)-GPMI(107)	FAALGKGR(6)-AKNAGK(2)	23	1.34e-05					n.a.
1154	PFLB(725)-PFLB(386)	EMLLDAMENPEKYPQLTIR(12)-KFAAK(1)	23	4.79e-05			√		28.6425
1155	TIG(390)-TIG(83)	GLIEEMASAYEDPKEVIEFYSKNK(22)-EKINPAGAPTYVPGEYK(2), EVIEFYSKNK(8)-EKINPAGAPTYVPGEYK(2)	22	7.07e-17			√		33.8985
1156	HEM2(217)-HEM2(213)	KSYQMNPMNR(1)-EAAGSALKGDR(8)	22	3.34e-16	√		√	√	12.4213
1157	T1RK(769)-T1RK(773)	ITGDADKDAR(7)-KVQTMITR(1)	22	7.88e-13					n.a.
1158	RL2(59)-RL2(71)	HIGGGHKQAYR(7)-NKDGIPAVVER(2)	22	9.01e-11			√		28.1538
1159	EFTU1(325)-EFTU1(264),EFTU2(325)-EFTU2(264)	HTPFFKGYR(6)-KLLDEGR(1)	22	1.29e-09			√		27.6789
1160	SYM(466)-SYM(529)	YVDEQAPWVVAKQEGR(12)-VNPFKALYNR(5)	22	2.22e-09			√		23.7286
1161	TIG(83)-TIG(327)	EKINPAGAPTYVPGEYK(2)-FGGNEKQALELPR(6)	22	3.72e-09			√		33.9087
1162	MAO2(508)-MAO2(485)	FKEYWTEYFQIMK(2)-IQKLGLQIK(3)	22	6.45e-09					n.a.
1163	TYPA(50)-TYPA(324)	VMDSNDLEKER(9)-EGKFVTSR(3)	22	2.24e-08					n.a.
1164	RS1(279)-RS1(247)	YPEGTKLTGR(6)-VLKFDR(3)	22	3.95e-07					n.a.
1165	RL7/12(85)-RL7/12(66)	EAKDLVESAPAALK(3)-AAGANKVAVIK(6)	22	5.59e-07			√	√	7.90873
1166	MDAB(107)-MDAB(102)	KYGSGGLVQGK(1)-KDPSK(1)	22	2.16e-06			√	√	11.9393
1167	AAT(63)-AAT(276)	KAEQYLLENETTKNYLGIDGIPEFGR(13)-AFSQMKAAIR(6)	22	6.17e-06			√	√	20.4362
1168	RL17(78)-RL17(121)	DNEIVAKLFNELGPR(7)-SEKAEAAAE(3)	22	1.45e-05	√		√	√	13.6738
1169	ARCA(195)-ARCA(188)	ELKPHDR(3)-KMTGR(1)	22	4.6e-05	√				n.a.
1170	CH60(122)-CH60(425)	GIDKAVTAAVEELK(4)-VASKLADLR(4)	22	0.000216			√	√	12.0434
1171	EFTU1(10)-EFTU1(57),EFTU2(10)-EFTU2(57)	TKPHVNVGTIGHVDHGK(2)-AFDQIDNAPEEKAR(12)	21	4.22e-15			√		27.0376
1172	PFLB(57)-PFLB(107)	NYTPYEGDESFLAGATEATTTLWDKVMEGVK(25)-IVGLQTEAPLKR(11)	21	3.95e-12			√	√	14.0264
1173	EFTS(125)-EFTS(10)	VALVAKIGENINIR(6)-AEITASLVKELR(9)	21	7.82e-12			√	√	13.6304
1174	RS5(126)-RS5(167)	AVLEVAGVHNVLAKAYGSTNPINVVR(14)-SVEEILGK(8)	21	6.01e-11			√		27.9426
1175	RPOB(1127)-RPOB(1140)	GIGDKINAMLK(5)-QQQEVAKLR(7)	21	1.44e-09			√	√	9.62013
1176	CLPB(335)-CLPB(325)	FQKVFVAEPSVEDTIAILR(3)-QYIEKDAALER(5)	21	1.69e-08			√	√	13.5519
1177	MIND(163)-MIND(94)	ILGILASKSR(8)-DKDALTR(2)	21	3.64e-08			√	√	14.0402
1178	TKT1(254)-TKT1(5)	TIIGFGSPNKAGTHDSHGAPLGDAEIALTR(10)-KELANAIR(1)	21	3.68e-08			√	√	19.4434
1179	SYT(200)-SYT(241)	LMKTAGAYWR(3)-LEEAAKR(6)	21	5.04e-08			√	√	19.177
1180	SKP(67)-SKP(70)	METDLQAKMK(8)-KLQSMK(1)	21	1.33e-07			√	√	5.01065
1181	RL22(41)-RL22(48)	VSQALDILTYTNKK(13)-AAVLVKK(6)	21	1.97e-07			√	√	10.2527
1182	ODP1(369)-ODP1(376)	KIYAAFK(1)-KAQETK(1)	21	3.61e-06			√	√	10.723
1183	RNB(107)-RNB(52)	LAIVPDHPLLKDAIPCR(11)-SYFIPPPQMKK(10)	21	4.22e-06			√	√	12.8046
1184	AHPC(151)-AHPC(171)	KIKAAQYVASHPGEVCPAK(1)-WKEGEATLAPSLDLVGK(2)	20	3.74e-21					n.a.
1185	OPGG(107)-OPGG(104)	IKYSPDYFTFGDVQHDKDTVK(2)-INEVTATAVKR(10), IKYSPDYFTFGDVQHDK(2)-INEVTATAVKR(10)	20	3.91e-17			√	√	8.84775
1186	EFTU1(38)-EFTU1(264),EFTU2(38)-EFTU2(264)	TTLTAAITTVLAKTYGGAAR(13)-KLLDEGR(1)	20	1.64e-13			√	√	12.6222
1187	STPA(107)-STPA(117)	FTDVNGETKTWTGQGR(9)-TPKPIAQALAEGK(3)	20	8.03e-12			√	√	15.1858
1188	FABB(308)-FABB(127)	MAMHGVDTPIDYLNSHGTSTPVGDVKELAAIR(26)-GLKAVGPYVVTK(3)	20	1.15e-11			√		27.6266
1189	HSLU(109)-HSLU(118)	DLTDAAVKMVR(8)-VQAIEKNR(6)	20	1.92e-10			√	√	13.5015
1190	ODP2(313)-ODP2(346)	AEAPAAAPAAKAEGK(11)-EFGVNLAKVK(8)	20	3.09e-10					n.a.
1191	RPOB(844)-RPOB(890)	DTKLGPEEITADIPNVGEAALSK(3)-VTPKGETQLTPEEK(4)	20	3.45e-10			√	√	8.81713
1192	GRCA(88)-GRCA(62)	ETLEDAVKHPEK(8)-EVPVEVKPEVR(7)	20	1.26e-09					n.a.
1193	ADHE(875)-ADHE(882)	DYVEGETAAKK(10)-EAAPAKAEK(6)	20	4.98e-09					n.a.
1194	RL5(47)-RL5(69)	ITLNMGVGEAIADKK(14)-PLITKAR(5), ITLNMGVGEAIADKK(14)-LLDNAAADLAAISGQKPLITKAR(21)	20	5.21e-09	√		√	√	9.54534
1195	FUMA(185)-FUMA(246)	FLCIAKGGGSANK(6)-TVKLASAK(3)	20	6.97e-09					n.a.
1196	CARB(899)-CARB(993)	EVVLPFNKFPGVDPLLGPEMR(8)-LVNKVHEGRPHIQDR(4)	20	1.24e-08			√		25.9914
1197	PDXB(338)-PDXB(341)	VAGIPGEFDKLR(10)-KNYLER(1)	20	1.27e-08					n.a.
1198	3PASE(69)-3PASE(2)	YEMTMKVAGR(6)-AQEIELK(1)	20	5.13e-08					n.a.
1199	PURA(293)-PURA(125)	VGAGPFPTELFDETGEFLCKQGNEFGATTGR(20)-GAKAIGTTGR(3)	20	6.12e-08			√		25.5014
1200	HNS(136)-HNS(120)	SLDDFLIKQ(8)-TPAVIKK(6)	20	4.5e-07			√	√	18.797
1201	IHFB(27)-IHFB(3)	TVEDAVKEMLEHMASTLAQGER(7)-MTKSELIER(3)	20	4.96e-06			√	√	8.39004
1202	RL14(1)-RL14(44)	MIQEQTMLNVADNSGAR(1)-ITIKEAIPR(4)	20	0.000116			√	√	14.4036
1203	RS20(49)-RS20(34)	AAAQKAFNEMQPIVDR(5)-KVYAAIEAGDK(1)	19	3.32e-14	√		√	√	8.64136
1204	AHPC(27)-AHPC(12)	NGEFIEITEKDTEGR(10)-IKPFKNQAFK(5)	19	8.47e-12					n.a.
1205	EFG(143)-EFG(507)	IAFVNKMDR(6)-HAKQSGGR(3)	19	2.52e-11			√		85.3101
1206	PTNAB(225)-PTNAB(234)	TLLTQVAPPGVTAHVVDVAKMIR(20)-VYNNPKYAGER(6)	19	2.66e-10			√	√	14.7243
1207	KBL(244)-KBL(23)	VDIITGTLGKALGGASGGYTAAR(10)-AEGLFKEER(6)	19	8.13e-10			√	√	21.4295
1208	EFG(497)-EFG(159)	QKVTDVEGK(2)-VVNQIKTR(6)	19	1.86e-08			√		65.0013
1209	YAJQ(108)-YAJQ(115)	QGIESATQKK(9)-MIKDSK(3)	19	5.63e-08					n.a.
1210	CYSG(107)-CYSG(166)	IFCNVVDAPKAASFIMPSIIDR(10)-VKQQFATMGER(2)	19	1.01e-07					n.a.
1211	SODF(51)-SODF(2)	GTAFEGKSLEEIIR(7)-SFELPALPYAK(1)	19	1.5e-07			√	√	9.58448
1212	RL20(93)-RL20(85)	KILADIAVFDK(1)-KASVEIDR(1)	19	2.62e-07			√	√	14.5173
1213	RL4(74)-RL4(166)	SGSIKSPIWR(5)-NLHKVDVR(4)	19	2.16e-06			√		38.4789
1214	PFLB(616)-PFLB(386)	KTGNTPDGR(1)-KFAAK(1)	19	2.35e-06			√		42.275
1215	GLNB(58)-GLNB(40)	GAEYMVDFLPKVK(11)-QKGHTELYR(2)	19	7.05e-06			√	√	14.4758
1216	PTGA(8)-PTGA(2)	LKSLVSDDKK(2)-GLFDK(1)	19	2.61e-05					n.a.
1217	RL2(265)-RL2(207)	TDKFIVR(3)-VLGKAGAAR(4)	19	4.68e-05			√	√	20.9452
1218	YJGA(87)-YJGA(40)	QLQLIGKMLR(7)-DAEELKR(6)	19	6.2e-05					n.a.
1219	PNP(263)-PNP(1)	ITDKQER(4)-MLNPIVR(1)	19	0.000264			√	√	15.2803
1220	EFTU1(209)-EFTU1(177),EFTU2(209)-EFTU2(177)	AIDKPFLLPIEDVFSISGR(4)-GSALKALEGDAEWEAK(5)	18	1.33e-19			√		26.9274
1221	ISCS(206)-ISCS(105)	VDLMSFSGHKIYGPK(10)-TEHKAVLDTCR(4)	18	3.54e-15			√	√	15.9106
1222	RHO(326)-RHO(283)	NVEEGGSLTIIATALIDTGSKMDEVIYEEFK(21)-AYNTVVPASGKVLTGGVDANALHRPK(11)	18	1.67e-14			√	√	14.2315
1223	ODP2(302)-ODP2(410)	QEAAAPAPAAKAEAPAAAPAAK(11)-IQKISGANLSR(3)	18	1.88e-14					n.a.
1224	ENO(393)-ENO(405)	SGETEDATIADLAVGTAAGQIKTGSMSR(22)-VAKYNQLIR(3)	18	4.27e-14			√	√	9.69674
1225	RL7/12(85)-RL7/12(121)	EAKDLVESAPAALK(3)-ALEEAGAEVEVK(12)	18	4.8e-14			√	√	0.0712601
1226	SYK2(114)-SYK2(2)	DSLPEGVYNDQFKK(13)-SEQETR(1)	18	1.3e-12					n.a.
1227	PFLB(107)-PFLB(136)	IVGLQTEAPLKR(11)-KIFTEYR(1)	18	6.15e-12			√		23.0872
1228	RL9(112)-RL9(42)	DIADAVTAAGVEVAKSEVR(15)-KNIEFFEAR(1)	18	3.54e-11			√		22.1682
1229	SYM(133)-SYM(597)	TISQLYDPEKGMFLPDR(10)-VALIENAEFVEGSDKLLR(15)	18	4.14e-11					n.a.
1230	PTA(198)-PTA(255)	TRPDLSEIFDDSSKAK(14)-VKSVTFCAR(2)	18	8.92e-10					n.a.
1231	STPA(117)-STPA(2)	TPKPIAQALAEGK(3)-SVMLQSLNNIR(1)	18	2.13e-09					n.a.
1232	RHO(115)-RHO(100)	YFALLKVNEVNFDKPENAR(6)-TGDTISGKIRPPK(8)	18	3.79e-09			√	√	4.75228
1233	ODO2(2)-ODO2(94)	SSVDILVPDLPESVADATVATWHK(1)-SEEKASTPAQR(4)	18	4.32e-09					n.a.
1234	PURA(17)-PURA(268)	GNNVVVLGTQWGDEGKGK(16)-YVDYVLGILKAYSTR(10)	18	6.24e-09			√	√	9.0145
1235	SYW(181)-SYW(198)	VPEPFIPKSGAR(8)-MSKSDDNR(3)	18	9.41e-09					n.a.
1236	MENB(1)-MENB(89)	MIYPDEAMLYAPVEWHDCSEGFEDIR(1)-AFCSGGDQKVR(9)	18	2.02e-08			√	√	14.2415
1237	RF3(47)-RF3(310)	VLLFGQAIQTAGTVKGR(15)-IQANMDPKHR(8)	18	3.43e-08			√		24.5808
1238	SYS(115)-SYS(24)	DIALTIPNLPADEVPVGKDENDNVEVSR(18)-GFKLDVDK(3)	18	1.59e-07					n.a.
1239	RF3(488)-RF3(480)	KNESQLALDGGDNLAYIATSMVNLR(1)-WVECADAKK(8)	18	2.59e-07			√	√	12.4218
1240	HTPG(99)-HTPG(45)	DEVIDHLGTIAKSGTK(12)-ELISNASDAADKLR(12)	18	4.69e-07			√	√	19.3754
1241	CARB(358)-CARB(366)	TPASFEPSIDYVVTKIPR(15)-FNFEKFAGANDR(5)	18	4.96e-07			√		22.2446
1242	ARLY(101)-ARLY(2)	VGQLGKK(6)-ALWGGR(1)	18	5.82e-07					n.a.
1243	FKBA(127)-FKBA(134)	DAADNEAKGK(8)-EKFAK(2)	18	3.36e-06			√	√	10.7401
1244	RL10(20)-RL10(2)	QAIVAEVSEVAKGALSAVVADSR(12)-ALNLQDK(1)	18	8.23e-06			√	√	19.0766
1245	GUAA(465)-GUAA(309)	KYDWVVSLR(1)-KIIGR(1)	18	0.000569			√	√	16.3445
1246	DBHA(22)-DBHA(1)	TQAKAALESTLAAITESLK(4)-MNKTQLIDVIAEK(1)	17	1.02e-18			√	√	14.6307
1247	CLPB(522)-CLPB(530)	QLEAATQLEGKTMR(11)-NKVTDAEIAEVLAR(2)	17	3.54e-17					n.a.
1248	RL6(138)-RL6(6)	GADKQVIGQVAADLR(4)-VAKAPVVVPAGVDVK(3)	17	7.63e-12			√	√	17.0337
1249	RNB(359)-RNB(501)	HNHALVFKDRPDYR(8)-KYGDMINHR(1)	17	9.84e-12			√		24.5771
1250	6PGD(38)-6PGD(50)	SREKTEEVIAENPGK(4)-KLVPYYTVK(1), EKTEEVIAENPGK(2)-KLVPYYTVK(1)	17	2.17e-11			√	√	16.7523
1251	EFTU1(188)-EFTU1(264),EFTU2(188)-EFTU2(264)	ALEGDAEWEAKILELAGFLDSYIPEPER(11)-KLLDEGR(1)	17	2.93e-10			√	√	13.6591
1252	TIG(361)-TIG(81)	TNELKADEER(5)-NFIDAIIKEK(8)	17	6.96e-10			√		25.0479
1253	RS4(167)-RS4(156)	EKPTWLEVDAGK(2)-VKAALELAEQR(2)	17	7.17e-10			√	√	14.1231
1254	IHFA(45)-IHFA(66)	ALENGEQVKLSGFGNFDLR(9)-NPKTGEDIPITAR(3)	17	1.33e-09			√		38.0067
1255	FKBA(127)-FKBA(116)	DAADNEAKGK(8)-SSAQAKMEK(6)	17	2.22e-09			√	√	16.2412
1256	MANA(43)-MANA(280)	TALTELYGMENPSSQPMAELWMGAHPKSSSR(27)-AGLTPKYIDIPELVANVK(6)	17	3.3e-09					n.a.
1257	CH60(117)-CH60(34)	AVAAGMNPMDLKR(12)-VTLGPKGR(6)	17	5.47e-09	√		√	√	10.3744
1258	DAPD(263)-DAPD(259)	GKVGINELLR(2)-KVDAKTR(5), GKVGINELLR(2)-VDAKTR(4)	17	9.92e-09	√				n.a.
1259	PYRI(60)-PYRI(2)	DLIKIENTFLSEDQVDQLALYAPQATVNR(4)-THDNK(1)	17	2.13e-08			√	√	9.00923
1260	RPOB(900)-RPOB(914)	GETQLTPEEKLLR(10)-ASDVKDSSLR(5)	17	1.23e-07			√	√	14.0646
1261	GREA(116)-GREA(13)	IVGDDEADFKQNLISVNSPIAR(10)-GAEKLREELDFLK(4)	17	2.13e-07			√	√	17.4563
1262	CH10(1)-CH10(15)	MNIRPLHDR(1)-KEVETK(1)	17	2.24e-07	√		√	√	13.9674
1263	PFLB(725)-PFLB(63)	EMLLDAMENPEKYPQLTIR(12)-VMEGVKLENR(6)	17	8.63e-07			√	√	10.9809
1264	GCH1(129)-GCH1(95)	ATVAYIPKDSVIGLSK(8)-MKVDEMVTVR(2)	17	3.13e-06			√	√	7.58695
1265	PUR1(327)-PUR1(350)	QGFVKNR(5)-KLNANR(1)	17	7.71e-06			√	√	5.35028
1266	OMPA(213)-OMPA(338)	FGQGEAAPVVAPAPAPAPEVQTKHFTLK(23)-GIKDVVTQPQA(3)	17	8.33e-06					n.a.
1267	RLMB(2)-RLMB(75)	SEMIYGIHAVQALLER(1)-VKPGR(2)	17	0.000138					n.a.
1268	ODO2(2)-ODO2(90)	SSVDILVPDLPESVADATVATWHK(1)-ETSAKSEEK(5)	17	0.00015					n.a.
1269	ODP2(410)-ODP2(348)	IQKISGANLSR(3)-VKGTGR(2)	17	0.000378					n.a.
1270	EFTU1(314)-EFTU1(325),EFTU2(314)-EFTU2(325)	FESEVYILSKDEGGR(10)-HTPFFKGYR(6)	16	1.65e-13			√	√	18.4022
1271	PTA(419)-PTA(639)	TVKAAAICAER(3)-SKAPNSPVAGR(2)	16	7.2e-11					n.a.
1272	RNC(210)-RNC(152)	KAEQAAAEQALK(1)-LDEISPGDKQK(9)	16	1.46e-10					n.a.
1273	RPOC(983)-RPOC(996)	NTELKLIDEFGR(5)-ESYKVPYGAVLAK(4)	16	1.52e-09			√	√	8.47738
1274	FKBA(179)-FKBA(65)	GTLIDGKEFDNSYTR(7)-YMENSLKEQEK(7)	16	8.28e-09			√		22.1378
1275	RL2(59)-RL2(68)	HIGGGHKQAYR(7)-IVDFKR(5)	16	1.41e-08			√	√	18.7206
1276	DEGP(327)-DEGP(362)	GAFVSQVLPNSSAAKAGIK(15)-AQVGTMPVGSKLTLGLLR(11)	16	4.5e-08			√	√	13.1328
1277	HNS(128)-HNS(120)	AMDEQGKSLDDFLIK(7)-TPAVIKK(6), AMDEQGKSLDDFLIKQ(7)-TPAVIKK(6)	16	1.95e-07			√	√	11.0047
1278	SYD(415)-SYD(283)	VGKDLGLTDESK(3)-YGSDKPDLR(5)	16	2.41e-07			√	√	16.2474
1279	ERA(32)-ERA(39)	LLGQKISITSR(5)-KAQTTR(1)	16	5.26e-07			√	√	21.2303
1280	CH60(80)-CH60(390)	EVASKANDAAGDGTTTATVLAQAIITEGLK(5)-VGAATEVEMKEK(10)	16	6.95e-07			√	√	13.7526
1281	ARGD(156)-ARGD(2)	SLFTVSVGGQPKYSDGFGPK(12)-AIEQTAITR(1)	16	1.15e-06					n.a.
1282	RS8(41)-RS8(56)	VAIANVLKEEGFIEDFK(8)-VEGDTKPELELTLK(6)	16	1.79e-06	√		√	√	21.5308
1283	IF2(155)-IF2(173)	EAAEKDKVSNQQDDMTK(5)-NAQAEKAR(6), EAAEKDK(5)-NAQAEKAR(6)	16	5.39e-06					n.a.
1284	RS13(78)-RS13(103)	EISMSIKR(7)-TKTNAR(2)	16	5.39e-06	√		√	√	19.9308
1285	RAIA(80)-RAIA(87)	HEDMYTAINELINKLER(14)-QLNKLQHK(4)	16	2.53e-05			√	√	10.5789
1286	SYC(73)-SYC(266)	NITDIDDKIIK(8)-EKMSK(2), NITDIDDKIIKR(8)-EKMSK(2)	16	0.0001			√	√	20.042
1287	RL2(111)-RL2(207)	GLKAGDQIQSGVDAAIKPGNTLPMR(3)-VLGKAGAAR(4)	16	0.000105			√		30.8944
1288	RS1(1)-RS1(158)	MTESFAQLFEESLK(1)-VIKLDQK(3)	16	0.000506					n.a.
1289	ARCA(178)-ARCA(188)	AMLHFCENPGKIQSR(11)-KMTGR(1)	16	0.00074					n.a.
1290	G6PD(147)-G6PD(25)	VVMEKPLGTSLATSQEINDQVGEYFEECQVYR(5)-KLLPSLYQLEK(1)	15	8.14e-14					n.a.
1291	DEOB(259)-DEOB(274)	HGQVVSVGKIADIYANCGITK(9)-VKATGLDALFDATIK(2)	15	3.9e-13					n.a.
1292	G6PD(71)-G6PD(25)	EALETFMKETIDEGLWDTLSAR(8)-KLLPSLYQLEK(1)	15	4.98e-13					n.a.
1293	SYQ(419)-SYQ(408)	NAYVIKAER(6)-LVLGKEVR(5)	15	6.45e-11			√	√	5.36965
1294	LUXS(23)-LUXS(2)	VAKTMNTPHGDAITVFDLR(3)-PLLDSFTVDHTR(1)	15	5.21e-10					n.a.
1295	PYRI(6)-PYRI(94)	THDNKLQVEAIK(5)-IDNYEVVGKSRPSLPER(9), THDNKLQVEAIK(5)-IDNYEVVGKSR(9)	15	5.47e-10			√	√	18.1261
1296	PFLB(124)-PFLB(162)	ALIPFGGIKMIEGSCKAYNR(16)-CRKSGVLTGLPDAYGR(3)	15	5.72e-10			√	√	21.8053
1297	PFLB(441)-PFLB(162)	ANLAKTMLYAINGGVDEK(5)-KSGVLTGLPDAYGR(1)	15	4.01e-09			√	√	12.1604
1298	RL2(18)-RL2(207)	HVVKVVNPELHK(4)-VLGKAGAAR(4)	15	6.59e-09			√	√	7.38642
1299	OPGG(340)-OPGG(219)	YDLRPSAWVTPKGEWGK(12)-ATGAYKFVVMPGR(6)	15	1.29e-08					n.a.
1300	LRP(25)-LRP(162)	NILNELQKDGR(8)-LVIKTR(4)	15	2e-08			√	√	12.8819
1301	PYRH(222)-PYRH(68)	VFNMNKPGALR(6)-GAGLAKAGMNR(6)	15	2.49e-08			√		25.378
1302	PPIB(19)-PPIB(77)	TFDDKAPETVK(5)-EPIKNEANNGLKNTR(12), TFDDKAPETVK(5)-NEANNGLKNTR(8)	15	6.26e-08			√	√	11.4349
1303	PYRH(68)-PYRH(2)	GAGLAKAGMNR(6)-ATNAKPVYK(1), GAGLAKAGMNR(6)-ATNAK(1)	15	9.87e-08					n.a.
1304	SYN(351)-SYN(294)	YLAEEHFKAPVVVK(8)-VDKDAVSR(3)	15	2.84e-07	√				n.a.
1305	RS10(30)-RS10(1)	LIDQATAEIVETAKR(14)-MQNQR(1)	15	7.23e-07			√	√	15.3836
1306	PCNB(252)-PCNB(218)	LFEESLKLLQAGYGYETYK(7)-FAAKLGMR(4)	15	7.48e-07					n.a.
1307	SODM(87)-SODM(205)	NNAGGHANHSLFWKGLK(14)-FAAKK(4)	15	1.78e-06			√	√	15.9059
1308	ODP2(396)-ODP2(346)	VDFSKFGEIEEVELGR(5)-EFGVNLAKVK(8)	15	2.99e-06					n.a.
1309	EFG(440)-EFG(425)	LAKEDPSFR(3)-TKADQEK(2)	15	2.68e-05			√		23.5403
1310	RPOC(1247)-RPOC(599)	LQGVKINDK(5)-KAISK(1)	15	2.83e-05			√	√	13.3493
1311	RS15(65)-RS15(73)	KLLDYLK(1)-KDVAR(1)	15	0.000207			√	√	11.0755
1312	CAPP(94)-CAPP(1)	AFSQFLNLANTAEQYHSISPKGEAASNPEVIAR(21)-MNEQYSALR(1)	14	8.86e-13					n.a.
1313	DLDH(106)-DLDH(278)	VINQLTGGLAGMAKGR(14)-VPNGKNLDAGK(5)	14	1.77e-11			√		30.7613
1314	EFTS(52)-EFTS(48)	KAGNVAADGVIK(1)-KSGAIKAAK(6), KAGNVAADGVIK(1)-SGAIKAAK(5)	14	4.2e-11			√	√	5.94439
1315	SYA(637)-SYA(648)	NLPIETNIMDLEAAKAK(15)-GAMALFGEKYDER(9)	14	1.36e-09					n.a.
1316	MRP(116)-MRP(116)	NIIAVSSGKGGVGK(9)-NIIAVSSGKGGVGK(9)	14	3.56e-09					n.a.
1317	RS5(126)-RS5(159)	AVLEVAGVHNVLAKAYGSTNPINVVR(14)-GKSVEEILGK(2)	14	3.69e-09			√		24.2375
1318	TREC(207)-TREC(144)	LDVVNLISKDPR(9)-SKFGGSAWR(2)	14	1.81e-08					n.a.
1319	PFLB(616)-PFLB(385)	KTGNTPDGR(1)-LPLNFKK(6)	14	1.89e-08			√		41.3038
1320	CARB(379)-CARB(649)	LTTQMKSVGEVMAIGR(6)-GVIVQYGGQTPLKLAR(13)	14	7.21e-08			√		26.2458
1321	PGM(462)-PGM(171)	AALSKLSPEMVSASTLAGDPITAR(5)-YNPPNGGPADTNVTKVVEDR(15)	14	1.01e-07					n.a.
1322	SYC(269)-SYC(73)	MSKSLGNFFTVR(3)-NITDIDDKIIK(8)	14	1.69e-07			√	√	11.1297
1323	ODP2(366)-ODP2(410)	EDVQAYVKEAIK(8)-IQKISGANLSR(3)	14	3.86e-07					n.a.
1324	EFG(23)-EFG(143)	NIGISAHIDAGKTTTTER(12)-IAFVNKMDR(6)	14	1.03e-06	√		√	√	10.2934
1325	RL2(18)-RL2(108)	HVVKVVNPELHK(4)-YILAPKGLK(6)	14	1.27e-06			√	√	17.7197
1326	RL1(167)-RL1(14)	NDKNGIIHTTIGK(3)-EKVDATK(2)	14	2.3e-06			√	√	21.1873
1327	RL2(71)-RL2(68)	NKDGIPAVVER(2)-IVDFKR(5)	14	3.33e-06	√		√	√	8.48
1328	RS10(82)-RS10(11)	LVDIVEPTEKTVDALMR(10)-LKAFDHR(2)	14	6.2e-06			√	√	18.3387
1329	RL4(139)-RL4(166)	LKDMALEDVLIITGELDENLFLAAR(2)-NLHKVDVR(4)	14	7.8e-06			√	√	9.28405
1330	SYI(171)-SYI(583)	ALGKIIGNGHLHK(4)-GKAPYR(2)	14	2.99e-05					n.a.
1331	PHSM(471)-PHSM(495)	QCNPALAALLDKSLQK(12)-FADDAKFR(6)	14	0.000127			√	√	13.0669
1332	SYL(289)-SYL(182)	NTKVAEAEMATMEK(3)-CDTKVER(4)	14	0.000142			√	√	10.0171
1333	IF1(39)-IF1(42)	VELENGHVVTAHISGKMR(16)-KNYIR(1)	13	5.95e-13	√		√	√	6.89544
1334	DLDH(80)-DLDH(92)	ALAEHGIVFGEPKTDIDK(13)-EKVINQLTGGLAGMAK(2)	13	1.78e-12			√	√	20.8195
1335	PFLB(725)-PFLB(162)	EMLLDAMENPEKYPQLTIR(12)-KSGVLTGLPDAYGR(1)	13	4.21e-12			√		39.5055
1336	RL27(44)-RL27(78)	GTKFHAGANVGCGR(3)-KFISIEAE(1)	13	5.08e-12			√	√	4.68969
1337	PTA(479)-PTA(639)	NKGMTETVAR(2)-SKAPNSPVAGR(2)	13	1.26e-11					n.a.
1338	RHO(181)-RHO(352)	GLIVAPPKAGK(8)-KIAEKR(5)	13	4.65e-11			√	√	10.0902
1339	KPYK1(68)-KPYK1(76)	TAAILLDTKGPEIR(9)-TMKLEGGNDVSLK(3)	13	1.77e-10	√		√	√	20.1147
1340	RL11(87)-RL11(81)	AAGIKSGSGKPNK(5)-TPPAAVLLKK(9)	13	2.38e-10			√	√	3.68539
1341	SYN(114)-SYN(2)	VEVAGWVEDPDTYPMAAKR(18)-SVVPVADVLQGR(1)	13	5.52e-10					n.a.
1342	RS11(57)-RS11(75)	KSTPFAAQVAAER(1)-CADAVKEYGIK(6)	13	5.56e-10			√	√	18.7065
1343	G6PI(2)-G6PI(80)	MKNINPTQTAAWQALQK(2)-ECDLAGAIKSMFSGEK(9)	13	1.01e-09			√	√	11.5659
1344	SYK1(156)-SYK1(2)	ALRPLPDKFHGLQDQEAR(8)-SEQHAQGADAVVDLNNELK(1)	13	1.03e-09					n.a.
1345	PYRI(13)-PYRI(2)	LQVEAIKR(7)-THDNK(1)	13	2.68e-09			√	√	9.1475
1346	PTA(665)-PTA(479)	ATVFIFPDLNTGNTTYKAVQR(17)-NKGMTETVAR(2)	13	4.09e-09					n.a.
1347	RSMB(291)-RSMB(296)	VYDNLKR(6)-LGMKATVK(4)	13	5.79e-09			√	√	7.44189
1348	RPOC(395)-RPOC(399)	GLATTIKAAK(7)-KMVER(1)	13	2.06e-08			√	√	6.14304
1349	PEPD(389)-PEPD(315)	LAGAKTEAK(5)-AALIAKSR(6)	13	2.22e-08	√				n.a.
1350	YICC(233)-YICC(235)	ETYNILKK(7)-KEAVGR(1)	13	3.38e-08					n.a.
1351	6PGD(458)-6PGD(454)	IDKEGVFHTEWLD(3)-DYFGAHTYKR(9)	13	6.57e-08			√	√	7.91317
1352	FABI(201)-FABI(201)	TLAASGIKDFR(8)-TLAASGIKDFR(8)	13	1.31e-07			√	√	0
1353	RL3(106)-RL3(123)	KVDVTGTSK(1)-GFAGTVKR(7)	13	3.23e-07			√		24.8817
1354	RS5(52)-RS5(23)	VGFGYGKAR(7)-VSKTVK(3)	13	4.12e-07			√	√	11.1387
1355	PNP(628)-PNP(606)	VYTGKVTR(5)-AKHAIR(2)	13	7.27e-07					n.a.
1356	ODO2(152)-ODO2(300)	HLAKAPAK(4)-IKELAVK(2)	13	6.17e-06					n.a.
1357	PFLB(162)-PFLB(136)	KSGVLTGLPDAYGR(1)-KIFTEYR(1)	13	8.14e-06			√		27.9863
1358	RS1(260)-RS1(247)	VSLGLKQLGEDPWVAIAK(6)-VLKFDR(3)	13	1.58e-05	√				n.a.
1359	DLDH(339)-DLDH(299)	KHYFDPK(1)-VDKQLR(3)	13	2.82e-05	√		√	√	10.9558
1360	PYRF(235)-PYRF(2)	PVTQSVDPAQTLKAINASLQR(13)-TLTASSSSR(1)	13	3.35e-05					n.a.
1361	RL2(71)-RL2(207)	NKDGIPAVVER(2)-VLGKAGAAR(4)	13	3.76e-05			√		40.743
1362	ENO(180)-ENO(6)	TVKEAIR(3)-IVKIIGR(3)	13	4.02e-05			√		22.5609
1363	PSPA(120)-PSPA(55)	KEIGELENK(1)-KQLTR(1)	13	5.12e-05					n.a.
1364	MENB(98)-MENB(273)	GDYGGYKDDSGVHHLNVLDFQR(7)-NAFNQKR(6)	13	5.93e-05			√	√	20.5014
1365	EFG(159)-EFG(675)	VVNQIKTR(6)-SLTKGR(4)	13	6.78e-05			√	√	19.4102
1366	YGGE(134)-YGGE(62)	LNSLLDGALKAGLNEIR(10)-DAATAKK(6)	13	9.81e-05					n.a.
1367	DLDH(92)-DLDH(85)	EKVINQLTGGLAGMAK(2)-TDIDKIR(5)	13	0.000132			√	√	10.2292
1368	RL17(78)-RL17(99)	DNEIVAKLFNELGPR(7)-ILKCGFR(3)	13	0.00014			√		24.9195
1369	MDAB(173)-MDAB(102)	ANQFLGMEPLPTFIANDVIKMPDVPR(20)-KDPSK(1)	13	0.000207			√	√	15.3773
1370	LPXD(315)-LPXD(331)	KTAALVMNIDDMSK(1)-LKSLER(2)	13	0.000351			√	√	14.9492
1371	RS5(126)-RS5(86)	AVLEVAGVHNVLAKAYGSTNPINVVR(14)-NMINVALNNGTLQHPVKGVHTGSR(17)	12	1e-17			√	√	8.67516
1372	CH10(74)-CH10(34)	VGDIVIFNDGYGVKSEK(14)-SAGGIVLTGSAAAKSTR(14)	12	6.96e-14			√	√	11.9429
1373	NAGZ(159)-NAGZ(306)	FIDGMHEAGMKTTGK(11)-LYHKGSFSR(4)	12	6.94e-12					n.a.
1374	CLPB(250)-CLPB(163)	VLALDMGALVAGAKYR(14)-KYTIDLTER(1)	12	3.93e-11			√	√	16.1971
1375	TYPH(165)-TYPH(1)	DVGVAIIGQTSSLAPADKR(18)-MFLAQEIIR(1)	12	5.4e-11					n.a.
1376	YBAB(106)-YBAB(89)	MASVSSGMQLPPGFKMPF(15)-RIEETQKEK(7)	12	1.4e-09					n.a.
1377	LDHD(271)-LDHD(248)	DLFFEDKSNDVIQDDVFR(7)-GALIDSQAAIEALKNQK(14)	12	8.77e-09					n.a.
1378	GLPC(32)-GLPC(44)	VNPGYPGPKQAGPDGER(9)-LKDGALYDEALK(2)	12	9.82e-09					n.a.
1379	ODP2(410)-ODP2(346)	IQKISGANLSR(3)-EFGVNLAKVK(8)	12	1.01e-08					n.a.
1380	EFG(440)-EFG(507)	LAKEDPSFR(3)-HAKQSGGR(3)	12	2.05e-08			√		57.2038
1381	RL28(26)-RL28(54)	SHALNATKR(8)-VSAKGMR(4)	12	3.65e-08	√		√		22.5928
1382	TIG(368)-TIG(390)	VKGLIEEMASAYEDPK(2)-EVIEFYSKNK(8)	12	4.33e-08			√	√	12.0614
1383	DNAK(183)-DNAK(502)	IINEPTAAALAYGLDKGTGNR(16)-ITIKASSGLNEDEIQK(4)	12	7.8e-08			√		25.5911
1384	RS4(83)-RS4(22)	LKGNTGENLLALLEGR(2)-EGTDLFLKSGVR(8)	12	1.06e-07			√		33.4882
1385	ODO2(156)-ODO2(148)	APAKESAPAAAAPAAQPALAAR(4)-EDVEKHLAK(5)	12	1.12e-07	√				n.a.
1386	UPP(70)-UPP(26)	KITVVPILR(1)-EQDISTKR(7)	12	1.49e-07			√	√	12.4078
1387	SURA(278)-SURA(388)	GESKNISVTEVHAR(4)-NVDKTDAAQK(4)	12	1.56e-07					n.a.
1388	SODM(119)-SODM(68)	AEFEKAAASR(5)-LDQLPADKK(8)	12	1.57e-07			√	√	17.4621
1389	RBSB(144)-RBSB(295)	KAGEGAK(1)-LVVKQ(4)	12	1.86e-07			√	√	13.1021
1390	ATPA(501)-ATPA(388)	LKGILDSFK(2)-KLSGGIR(1)	12	3.44e-07			√	√	14.73
1391	PYRI(6)-PYRI(1)	THDNKLQVEAIK(5)-MTHDNK(1)	12	7.04e-07			√	√	5.96869
1392	RL5(64)-RL5(47)	LLDNAAADLAAISGQKPLITKAR(16)-ITLNMGVGEAIADKK(14), LLDNAAADLAAISGQKPLITK(16)-ITLNMGVGEAIADKK(14)	12	2.29e-06			√	√	13.8927
1393	ARCA(195)-ARCA(187)	ELKPHDR(3)-AELLKK(5)	12	2.32e-06					n.a.
1394	YBIT(298)-YBIT(291)	LEEVKASSR(5)-QIDKIK(4)	12	3.84e-06					n.a.
1395	RNE(235)-RNE(196)	QDIGEILIDNPKVLELAR(12)-KAAESR(1)	12	4.41e-06			√		24.6214
1396	PCNB(79)-PCNB(218)	KPKDFDVTTNATPEQVR(3)-FAAKLGMR(4)	12	9.71e-06					n.a.
1397	SYY(85)-SYY(235)	FQQAGHKPVALVGGATGLIGDPSFKAAER(25)-ADGTKFGK(5)	12	3.49e-05			√	√	13.851
1398	RS16(76)-RS16(1)	VAALIKEVNK(6)-MVTIR(1)	12	3.84e-05			√	√	20.6649
1399	UNG(184)-UNG(177)	HHVLKAPHPSPLSAHR(5)-GAIIDKQR(6)	12	4.79e-05			√	√	11.3646
1400	PYRH(198)-PYRH(68)	ELKVMDLAAFTLAR(3)-GAGLAKAGMNR(6)	12	5.12e-05			√		22.2756
1401	DEOC(13)-DEOC(5)	ALKLMDLTTLNDDDTDEK(3)-TDLKASSLR(4)	12	8.46e-05			√	√	12.4712
1402	AROG(48)-AROG(41)	ILKGNDDR(3)-KAIHK(1)	12	8.63e-05			√	√	9.99584
1403	RS1(150)-RS1(247)	DTLHLEGKELEFK(8)-VLKFDR(3)	12	0.000172					n.a.
1404	YICC(61)-YICC(61)	GKVECTLR(2)-GKVECTLR(2)	12	0.000568	√				n.a.
1405	RL28(62)-RL28(54)	KGIDTVLAELR(1)-VSAKGMR(4)	12	0.000578			√	√	11.1371
1406	ODP2(396)-ODP2(313)	VDFSKFGEIEEVELGR(5)-AEAPAAAPAAKAEGK(11)	11	1.03e-19					n.a.
1407	TIG(414)-TIG(361)	NVALEEQAVEAVLAKAK(15)-TNELKADEER(5)	11	1.12e-16			√	√	17.9695
1408	PFLB(124)-PFLB(107)	MIEGSCKAYNR(7)-IVGLQTEAPLKR(11)	11	7.75e-15			√	√	16.781
1409	EFTS(25)-EFTS(2)	KALTEANGDIELAIENMR(1)-AEITASLVK(1)	11	4.68e-14			√	√	9.8684
1410	LACI(327)-LACI(325)	KTTLAPNTQTASPR(1)-GNQLLPVSLVKR(11)	11	6.55e-13			√	√	6.79265
1411	RPOD(121)-RPOD(371)	EGEIDIAKR(8)-MSIGEAKAR(7)	11	2.47e-12			√	√	10.2321
1412	RS2(59)-RS2(2)	TVPMFNEALAELNKIASR(14)-ATVSMR(1)	11	1.26e-11			√	√	10.6667
1413	LUXS(163)-LUXS(2)	INSNEELALPKEK(11)-PLLDSFTVDHTR(1)	11	6.49e-10					n.a.
1414	RPOC(1340)-RPOC(1348)	VLTEAAVAGKR(10)-GLKENVIVGR(3)	11	7.45e-10			√	√	16.7537
1415	RS12(108)-RS12(2)	GALDCSGVKDR(9)-ATVNQLVR(1)	11	2.99e-09			√		52.6735
1416	ODP2(537)-ODP2(531)	DGKLTAGEMQGGCFTISSIGGLGTTHFAPIVNAPEVAILGVSK(3)-ELMTISKK(7)	11	1.21e-08					n.a.
1417	RL15(29)-RL15(63)	GIGSGLGKTGGR(8)-LPKFGFTSR(3)	11	2.77e-08			√		42.879
1418	NLPD(280)-NLPD(368)	VIETFGASEGGNKGIDIAGSK(13)-GKSVNPLR(2)	11	2.92e-08					n.a.
1419	GLK(273)-GLK(284)	FLEFFKASGFR(6)-AAFEDKGR(6)	11	8.16e-08					n.a.
1420	GLPQ(140)-GLPQ(195)	FPMGKSDFR(5)-KYGYTGK(1)	11	8.39e-08	√		√	√	14.6487
1421	ADHE(882)-ADHE(143)	EAAPAKAEK(6)-AKDATNK(2), KEAAPAKAEK(7)-AKDATNK(2)	11	1.17e-07					n.a.
1422	AAT(276)-AAT(93)	AFSQMKAAIR(6)-GSALINDKR(8)	11	1.5e-07	√		√	√	17.0165
1423	RSGA(340)-RSGA(343)	ILESMAQVKTR(9)-KNFSDTDD(1)	11	5.68e-07					n.a.
1424	MENB(1)-MENB(273)	MIYPDEAMLYAPVEWHDCSEGFEDIR(1)-NAFNQKR(6)	11	5.77e-07			√	√	7.38809
1425	ENO(360)-ENO(180)	MAKDAGYTAVISHR(3)-TVKEAIR(3)	11	6.03e-07			√		25.0401
1426	NRDD(29)-NRDD(21)	AAKAAEVDDADYCATVAAVVSEQMQGR(3)-IKEAILR(2)	11	9.54e-07					n.a.
1427	RNR(30)-RNR(2)	EFILEHLTKR(9)-SQDPFQER(1)	11	1.07e-06					n.a.
1428	GRPE(82)-GRPE(85)	TELDIEKAHK(7)-AHKFALEK(3), RTELDIEKAHK(8)-AHKFALEK(3)	11	2.25e-06			√	√	5.08573
1429	NRDD(453)-NRDD(440)	LEGVKAR(5)-KALMTR(1)	11	2.72e-06					n.a.
1430	SKP(75)-SKP(75)	LQSMKAGSDR(5)-LQSMKAGSDR(5)	11	5.88e-06			√	√	0
1431	GRPE(90)-GRPE(85)	FALEKFINELLPVIDSLDR(5)-AHKFALEK(3)	11	1.26e-05			√	√	8.88188
1432	RL17(56)-RL17(99)	VVEPLITLAKTDSVANR(10)-ILKCGFR(3)	11	1.99e-05			√		26.1745
1433	IMDH(88)-IMDH(110)	KHESGVVTDPQTVLPTTTLR(1)-EVKELTER(3)	11	3.49e-05					n.a.
1434	EFPL(23)-EFPL(51)	LLLVKDIDIQSPTAR(5)-TGLKVEER(4)	11	4.01e-05					n.a.
1435	PURA(2)-PURA(29)	GNNVVVLGTQWGDEGK(1)-AKYVVR(2)	11	4.29e-05			√	√	12.9003
1436	RS1(158)-RS1(247)	VIKLDQK(3)-VLKFDR(3)	11	4.62e-05					n.a.
1437	YJJK(2)-YJJK(13)	AQFVYTMHR(1)-VGKVVPPK(3)	11	6.65e-05			√		28.0769
1438	FABI(163)-FABI(201)	AIPNYNVMGLAKASLEANVR(12)-TLAASGIKDFR(8)	11	0.000144			√	√	17.0534
1439	GLMM(412)-GLMM(305)	KSGTEPLIR(1)-AKVGDR(2)	11	0.000871	√				n.a.
1440	USPF(96)-USPF(104)	VHVHVEEGSPKDR(11)-ILELAKK(6)	10	5.37e-16	√				n.a.
1441	6PGD(75)-6PGD(260)	ILLMVKAGAGTDAAIDSLKPYLDK(6)-KDEDGNYLVDVILDEAANKGTGK(19)	10	9.54e-15			√	√	9.69642
1442	RS1(226)-RS1(229)	NLTDYGAFVDLGGVDGLLHITDMAWKR(26)-VKHPSEIVNVGDEITVK(2)	10	1.23e-13					n.a.
1443	RL21(10)-RL21(85)	MYAVFQSGGKQHR(10)-KQQGHR(1)	10	1.73e-13			√		27.0427
1444	DNAK(452)-DNAK(502)	AADNKSLGQFNLDGINPAPR(5)-ITIKASSGLNEDEIQK(4)	10	1.78e-13			√	√	11.1036
1445	GLYA(380)-GLYA(293)	EAEAKELAGWMCDVLDSINDEAVIER(5)-TYQQQVAKNAK(8)	10	3.45e-13			√	√	10.692
1446	DHPS(146)-DHPS(221)	SLSEPGALEAAAETGLPVCLMHMQGNPKTMQEAPK(28)-KSMIGQLLNVGPSER(1)	10	2.07e-12			√	√	13.951
1447	EFTS(247)-EFTS(159)	TVGQLLKEHNAEVTGFIR(7)-IGVLVAAKGADEELVK(8)	10	4.85e-12			√	√	10.8953
1448	RL3(55)-RL3(7)	AIQVTTGAKK(9)-MIGLVGKK(7)	10	1.91e-11			√	√	13.4111
1449	ASSY(133)-ASSY(391)	EDGVNIWGDGSTYKGNDIER(14)-LTMEKGDSVFSPDDR(5)	10	2.29e-11			√		64.885
1450	DNAK(166)-DNAK(155)	IAGLEVKR(7)-QATKDAGR(4)	10	3.14e-10	√		√	√	9.25954
1451	RFAF(125)-RFAF(313)	VLDKEAWPLMVER(4)-LITGYHKVR(7)	10	7.16e-10					n.a.
1452	FKBA(110)-FKBA(270)	VKSSAQAK(2)-AADSAKK(7)	10	1.02e-09					n.a.
1453	RL3(114)-RL3(123)	KVDVTGTSKGK(9)-GFAGTVKR(7), VDVTGTSKGK(8)-GFAGTVKR(7)	10	5.02e-09			√	√	10.9913
1454	RS1(434)-RS1(363)	ISLGVKQLAEDPFNNWVALNK(6)-ANPWQQFAETHNKGDR(13)	10	5.14e-09					n.a.
1455	PANC(151)-PANC(39)	LFNLVQPDIACFGEKDFQQLALIR(15)-VALVPTMGNLHDGHMKLVDEAK(16)	10	5.98e-09			√	√	11.9337
1456	FTSE(155)-FTSE(124)	AVVNKPAVLLADEPTGNLDDALSEGILR(5)-VSAALDKVGLLDK(7)	10	7.71e-09					n.a.
1457	IF2(141)-IF2(186),IF2(149)-IF2(186)	EAAEQAKR(7)-KAEEEAR(1)	10	9.32e-09					n.a.
1458	ODO2(133)-ODO2(218)	LLAEHNLDASAIKGTGVGGR(13)-KQYGEAFEK(1)	10	1.35e-08					n.a.
1459	LPOB(147)-LPOB(163)	FTLVSAQQLSMAKQQLGLSPQDSLGTR(13)-SKAIGIAR(2)	10	2.4e-08					n.a.
1460	SYY(90)-SYY(238)	KLNTEETVQEWVDK(1)-FGKTEGGAVWLDPK(3)	10	2.9e-08			√	√	19.0882
1461	CARB(872)-CARB(863)	VMAGKSLAEQGVTK(5)-ATGVPLAKVAAR(8)	10	4.28e-08			√	√	10.8685
1462	DEOD(27)-DEOD(27)	AKYIAETFLEDAR(2)-AKYIAETFLEDAR(2)	10	4.99e-08			√	√	0
1463	RS3(45)-RS3(86)	QYLTKELAK(5)-KGEDVEKLR(7), QYLTKELAK(5)-GEDVEKLR(6)	10	6.37e-08			√	√	9.74058
1464	IF2(131)-IF2(125)	EAQQKAER(5)-EAEESAKR(7)	10	3.02e-07	√				n.a.
1465	OPDA(679)-OPDA(311)	GREPQLDAMLEHYGIKG(16)-ARPQGEKELAQLR(7)	10	3.16e-07					n.a.
1466	IDH(186)-IDH(177)	EEMGVKK(6)-VIKFLR(3)	10	4.45e-07			√	√	10.7975
1467	GNSA(53)-GNSA(7)	MTGLESYDVKIK(10)-MNIEELKK(7)	10	5.86e-07			√	√	8.45533
1468	RL28(10)-RL28(54)	VCQVTGKR(7)-VSAKGMR(4), VCQVTGKRPVTGNNR(7)-VSAKGMR(4)	10	6.84e-07	√		√	√	8.48218
1469	RS3(45)-RS3(80)	QYLTKELAK(5)-KGEDVEK(1)	10	1.04e-06			√	√	17.9092
1470	PTNAB(132)-PTNAB(234)	AKPVEK(2)-VYNNPKYAGER(6), AKPVEKAAPAPAAAAPK(2)-VYNNPKYAGER(6)	10	1.18e-06			√		32.612
1471	GCST(280)-GCST(353)	EHGTEKLVGLVMTEK(6)-VTKPVFVR(3)	10	1.53e-06			√	√	10.1845
1472	ENO(357)-ENO(328)	FNQIGSLTETLAAIKMAK(15)-ILKEGIEK(3)	10	2.32e-06			√	√	11.1704
1473	SSPA(146)-SSPA(2)	EELLAIAPVFGQKPYFLSDEFSLVDCYLAPLLWR(13)-AVAANK(1)	10	2.53e-06					n.a.
1474	PEPD(315)-PEPD(315)	AALIAKSR(6)-AALIAKSR(6)	10	3.08e-06	√				n.a.
1475	RL23(19)-RL23(9)	APHVSEKASTAMEK(7)-LLKVLR(3)	10	5.04e-06			√		23.4407
1476	ENO(120)-ENO(180)	FGANAILAVSLANAKAAAAAK(15)-TVKEAIR(3)	10	6.79e-06			√		23.7716
1477	FKBA(119)-FKBA(69)	MEKDAADNEAK(3)-EQEKLGIK(4)	10	8.76e-06			√	√	12.441
1478	RL2(183)-RL2(183)	KVEADCR(1)-KVEADCR(1)	10	8.78e-06			√	√	0
1479	UPP(116)-UPP(26)	NEETLEPVPYFQKLVSNIDER(13)-EQDISTKR(7)	10	9.39e-06			√	√	18.2835
1480	DBHB(67)-DBHB(67)	NPQTGKEITIAAAK(6)-NPQTGKEITIAAAK(6)	10	1.14e-05					n.a.
1481	PGM(529)-PGM(2)	KQIEK(1)-AIHNR(1)	10	1.76e-05					n.a.
1482	GUAA(356)-GUAA(309)	AHVIKSHHNVGGLPK(5)-KIIGR(1)	10	2.6e-05					n.a.
1483	MLTA(223)-MLTA(213)	KEDMSMQAIR(1)-SIGKVLIDR(4)	10	3.94e-05			√	√	8.32355
1484	TIG(327)-TIG(327)	FGGNEKQALELPR(6)-FGGNEKQALELPR(6)	10	5.82e-05			√	√	0
1485	RL7/12(121)-RL7/12(71)	ALEEAGAEVEVK(12)-VAVIKAVR(5)	10	7e-05			√	√	0.0437379
1486	RLMI(9)-RLMI(13)	LVLAKGR(5)-EKSLLR(2)	10	7.78e-05			√	√	9.6841
1487	RL2(125)-RL2(108)	AGDQIQSGVDAAIKPGNTLPMR(14)-YILAPKGLK(6)	10	0.000103	√		√	√	8.70036
1488	RS2(115)-RS2(112)	LKDLETQSQDGTFDK(2)-QSIKR(4)	10	0.000162	√		√	√	4.44785
1489	RNC(35)-RNC(1)	SASSKHNER(5)-MNPIVINR(1)	10	0.000252					n.a.
1490	DKSA(8)-DKSA(147)	KTSSLSILAIAGVEPYQEKPGEEYMNEAQLAHFR(1)-EKQMAG(2)	10	0.000784			√	√	11.4496
1491	KAD(192)-KAD(211)	EAEAGNTKYAK(8)-ADLEKILG(5)	10	0.000795			√	√	13.0824
1492	EFTU1(209)-EFTU1(5),EFTU2(209)-EFTU2(5)	AIDKPFLLPIEDVFSISGR(4)-EKFER(2)	10	0.000939			√		24.6942
1493	PFLB(643)-PFLB(386)	DQKGAVASLTSVAK(3)-KFAAK(1)	10	0.00243			√		25.4202
1494	TPX(2)-TPX(33)	SQTVHFQGNPVTVANSIPQAGSK(1)-AQTFTLVAKDLSDVTLGQFAGK(9)	9	9.7e-21			√		27.2432
1495	CH60(105)-CH60(105)	ANDAAGDGTTTATVLAQAIITEGLKAVAAGMNPMDLK(25)-ANDAAGDGTTTATVLAQAIITEGLKAVAAGMNPMDLK(25)	9	2.69e-20			√	√	0
1496	TYPA(50)-TYPA(59)	VMDSNDLEKER(9)-GITILAKNTAIK(7)	9	2.12e-14					n.a.
1497	IDH(142)-IDH(100)	YYQGTPSPVKHPELTDMVIFR(10)-VAIKGPLTTPVGGGIR(4)	9	1.99e-13			√		32.7965
1498	EX7S(52)-EX7S(4)	QGQAKLQQAEQR(5)-KNEAPASFEK(1)	9	2.42e-12					n.a.
1499	EFTU1(57)-EFTU1(57),EFTU2(57)-EFTU2(57)	AFDQIDNAPEEKAR(12)-AFDQIDNAPEEKAR(12)	9	6.68e-12			√	√	0
1500	IMDH(479)-IMDH(411)	ISGAGIQESHVHDVTITKESPNYR(18)-YFQSDNAADKLVPEGIEGR(10)	9	4.06e-11					n.a.
1501	DLDH(365)-DLDH(370)	VIPSIAYTEPEVAWVGLTEKEAK(20)-EKGISYETATFPWAASGR(2)	9	6.96e-11			√	√	8.69347
1502	NRDR(65)-NRDR(53)	EPFNEEKLR(7)-VVKSNDVR(3)	9	9.44e-11					n.a.
1503	IF2(125)-IF2(141),IF2(125)-IF2(149)	EAEESAKR(7)-EAAEQAKR(7)	9	4.13e-10					n.a.
1504	IF2(131)-IF2(141),IF2(131)-IF2(149)	EAQQKAER(5)-EAAEQAKR(7)	9	5.29e-10	√				n.a.
1505	PTA(255)-PTA(200)	VKSVTFCAR(2)-AKVNNVDPAK(2)	9	5.94e-10					n.a.
1506	SYK2(179)-SYK2(189)	YLDLIANDKSR(9)-SKILAAIR(2)	9	6.6e-10			√	√	15.0098
1507	GLMS(453)-GLMS(231)	IEQMLSQDKR(9)-TGAEVKR(6)	9	8.91e-10			√	√	15.9727
1508	NUOI(171)-NUOI(161)	GEAENEAKPIDVK(8)-MAGMAIDGKDK(9)	9	1.05e-09					n.a.
1509	RS1(363)-RS1(347)	ANPWQQFAETHNKGDR(13)-ISLGLKQCK(6)	9	1.23e-09					n.a.
1510	TIG(327)-TIG(342)	FGGNEKQALELPR(6)-ELFEEQAKR(8)	9	1.58e-09			√	√	20.9116
1511	RS5(156)-RS5(159)	ATIDGLENMNSPEMVAAKR(18)-GKSVEEILGK(2)	9	3.57e-09			√	√	4.85826
1512	YFEX(281)-YFEX(181)	FTKPVTGGYYFAPSLDK(3)-WEHNLKQLNR(6)	9	4.79e-09					n.a.
1513	RL7/12(96)-RL7/12(85)	DLVESAPAALKEGVSK(11)-EAKDLVESAPAALK(3)	9	5.48e-09			√	√	13.748
1514	PHOL(339)-PHOL(331)	KREEQEQK(1)-KAALAAER(1)	9	1.6e-08					n.a.
1515	SUCC(79)-SUCC(61)	AFAENWLGKR(9)-AGGVKVVNSK(5)	9	2.61e-08			√	√	16.0416
1516	AHPC(80)-AHPC(186)	LGVDVYAVSTDTHFTHKAWHSSSETIAK(17)-EGEATLAPSLDLVGKI(15)	9	3.81e-08					n.a.
1517	RL2(207)-RL2(68)	VLGKAGAAR(4)-IVDFKR(5)	9	1.73e-07			√		34.7103
1518	ODP2(456)-ODP2(442)	KLDVKITPVVFIMK(5)-KQQNEEAAK(1)	9	2.06e-07					n.a.
1519	PAND(115)-PAND(119)	TWRPNVAYFEGDNEMKR(16)-TAKAIPVQVA(3)	9	2.09e-07			√	√	8.68198
1520	IMDH(396)-IMDH(424)	GMGSLGAMSKGSSDR(10)-VAYKGR(4)	9	2.31e-07					n.a.
1521	FUR(9)-FUR(14)	TDNNTALKK(8)-AGLKVTLPR(4)	9	3.57e-07			√	√	6.56143
1522	IF2(141)-IF2(194),IF2(149)-IF2(194)	EAAEQAKR(7)-KLEEEAR(1)	9	5.1e-07					n.a.
1523	RBSB(291)-RBSB(143)	YPVDLKLVVK(6)-IAGDYIAKK(8)	9	8.21e-07	√		√	√	15.1926
1524	TYPH(299)-TYPH(291)	AKLQAVLDNGK(2)-LAKDDAEAR(3)	9	8.36e-07	√		√	√	10.8064
1525	NUSA(3)-NUSA(52)	MNKEILAVVEAVSNEK(3)-KSGDFDTFR(1)	9	1.01e-06			√	√	9.80864
1526	DNAK(245)-DNAK(263)	LINYLVEEFKK(10)-LKEAAEK(2)	9	1.13e-06			√	√	16.1131
1527	RL28(44)-RL28(54)	FWVESEKR(7)-VSAKGMR(4)	9	2.42e-06			√		23.1918
1528	YJJK(434)-YJJK(18)	FNFKGVDQGK(4)-VVPPKR(5)	9	5.28e-06			√	√	10.7693
1529	ENO(405)-ENO(62)	VAKYNQLIR(3)-FLGKGVTK(4)	9	5.43e-06			√	√	20.3364
1530	RL17(121)-RL17(99)	SEKAEAAAE(3)-ILKCGFR(3)	9	5.56e-06			√	√	14.5046
1531	PDXB(48)-PDXB(341)	SVTKVNESLLAGKPIK(4)-KNYLER(1), SVTKVNESLLAGK(4)-KNYLER(1)	9	9.25e-06					n.a.
1532	CARB(881)-CARB(1073)	SLAEQGVTKEVIPPYYSVK(9)-VISVQEMHAQIK(12)	9	1.28e-05			√	√	10.384
1533	RL2(183)-RL2(68)	KVEADCR(1)-IVDFKR(5)	9	1.28e-05			√	√	18.6166
1534	PFLB(162)-PFLB(135)	KSGVLTGLPDAYGR(1)-ELDPMIKK(7)	9	1.96e-05			√		25.799
1535	RL33(50)-RL33(33)	QHVIYKEAK(6)-TKPEKLELK(5)	9	2.05e-05	√		√	√	6.7241
1536	GUAA(381)-GUAA(517)	MGLVEPLKELFKDEVR(12)-VVYDISGKPPATIEWE(8), ELFKDEVR(4)-VVYDISGKPPATIEWE(8)	9	3.19e-05			√		22.3831
1537	LRP(129)-LRP(162)	KLLGETLLR(1)-LVIKTR(4)	9	3.48e-05	√		√	√	17.6852
1538	RNB(501)-RNB(512)	KYGDMINHR(1)-LLKAVIK(3)	9	4.93e-05			√	√	16.7654
1539	FOLC(60)-FOLC(188)	LGVLKPAPFVFTVAGTNGKGTTCR(19)-EKAGIFR(2)	9	0.000102					n.a.
1540	ODP1(859)-ODP1(865)	HHFEVDASYVVVAALGELAKR(20)-GEIDKK(5)	9	0.000174			√	√	7.42984
1541	FKBA(257)-FKBA(269)	ADAKPEADAK(4)-AADSAKK(6)	9	0.000567					n.a.
1542	RLMD(150)-RLMD(65)	KAGSSDIVDVK(1)-AKVVR(2)	9	0.000718			√	√	16.2624
1543	RS3(89)-RS3(45)	KVVADIAGVPAQINIAEVR(1)-QYLTKELAK(5)	9	0.000839			√	√	12.1226
1544	PFLB(32)-PFLB(17)	DFIQKNYTPYEGDESFLAGATEATTTLWDK(5)-LATAWEGFTKGDWQNEVNVR(10)	8	1.2e-23			√	√	7.1911
1545	YJBD(43)-YJBD(9)	VLTNSETNSIKK(11)-ITQKEMTER(4)	8	1.9e-14					n.a.
1546	PANC(1)-PANC(86)	MLIIETLPLLR(1)-KVDLVFAPSVK(1)	8	3.71e-12			√	√	6.6693
1547	GPMA(100)-GPMA(248)	HYGALQGLNKAETAEK(10)-AAAVANQGKAK(9)	8	1.24e-11			√	√	11.8658
1548	KBL(244)-KBL(258)	VDIITGTLGKALGGASGGYTAAR(10)-KEVVEWLR(1)	8	1.31e-11			√		25.4177
1549	RLUD(206)-RLUD(37)	THMAVHPMGKPAVTHYR(10)-IKEWILDQR(2)	8	2.55e-11			√		33.8586
1550	HNS(57)-HNS(120)	KLQQYR(1)-TPAVIKK(6)	8	1.92e-10	√				n.a.
1551	IHFA(66)-IHFA(57)	NPKTGEDIPITAR(3)-DKNQRPGR(2)	8	4.52e-10	√		√		23.8025
1552	DAPD(254)-DAPD(263)	YSLYCAVIVKK(10)-GKVGINELLR(2)	8	4.68e-10	√				n.a.
1553	SYGB(89)-SYGB(592)	GPAIAQAFDAEGKPSKAAEGWAR(16)-VSNILAKSDEVLSDR(7)	8	1.01e-09					n.a.
1554	PYRI(13)-PYRI(1)	LQVEAIKR(7)-MTHDNK(1)	8	1.64e-09			√	√	6.54388
1555	KDSA(189)-KDSA(154)	KVSGNSPVIFDVTHALQCR(1)-KPQFVSPGQMGNIVDKFK(16)	8	2.16e-09			√	√	16.0692
1556	ODO1(54)-ODO1(1)	STFQQLPGTGVKPDQFHSQTR(12)-MQNSALK(1)	8	2.51e-09					n.a.
1557	SYM(175)-SYM(143)	SPDQYGDNCEVCGATYSPTELIEPKSVVSGATPVMR(25)-FVKGTCPK(3)	8	5.74e-09			√	√	5.20359
1558	RPOB(203)-RPOB(163)	KLPATIILR(1)-GKTHSSGK(2)	8	1.07e-08			√	√	13.5109
1559	IF2(173)-IF2(186)	NAQAEKAR(6)-KAEEEAR(1)	8	3.05e-08					n.a.
1560	MALQ(176)-MALQ(681)	AMLVDVAKR(8)-LLKDLDR(3)	8	3.47e-08					n.a.
1561	IMDH(87)-IMDH(110)	VKKHESGVVTDPQTVLPTTTLR(2)-EVKELTER(3)	8	4.77e-08					n.a.
1562	G3P1(124)-G3P1(108)	VVMTGPSKDNTPMFVK(8)-KHITAGAK(1)	8	4.92e-08			√	√	15.4834
1563	PFLB(162)-PFLB(643)	KSGVLTGLPDAYGR(1)-DQKGAVASLTSVAK(3)	8	5.84e-08			√		37.8403
1564	G3P1(331)-G3P1(116)	VLDLIAHISK(10)-KVVMTGPSK(1)	8	1.5e-07			√	√	11.1343
1565	CH60(311)-CH60(242)	AMLQDIATLTGGTVISEEIGMELEKATLEDLGQAK(25)-EMLPVLEAVAKAGK(11)	8	6.46e-07			√	√	11.3532
1566	RL1(14)-RL1(210)	EKVDATK(2)-GVYIKK(5)	8	7.84e-07			√	√	20.8039
1567	ALF(319)-ALF(327)	ANEAYLQGQLGNPKGEDQPNK(14)-KYYDPR(1)	8	7.96e-07			√	√	13.4924
1568	DNAK(55)-DNAK(268)	TTPSIIAYTQDGETLVGQPAKR(21)-EAAEKAK(5)	8	1.13e-06			√	√	13.8021
1569	RS6(93)-RS6(106)	TKHAVTEASPMVK(2)-AKDER(2)	8	1.61e-06			√	√	19.1447
1570	PCKA(262)-PCKA(453)	TTLSTDPKR(8)-ISIKDTR(4)	8	1.82e-06			√	√	13.269
1571	ODP1(558)-ODP1(329)	EQVAYYKEDEK(7)-SKDGAYVR(2)	8	2.14e-06			√	√	18.9748
1572	RL2(97)-RL2(207)	SANIALVLYKDGER(10)-VLGKAGAAR(4)	8	2.24e-06			√		42.8092
1573	RL14(23)-RL14(44)	VMCIKVLGGSHR(5)-ITIKEAIPR(4)	8	2.44e-06			√	√	13.744
1574	RS7(36)-RS7(11)	KSTAESIVYSALETLAQR(1)-KILPDPK(1)	8	2.7e-06			√	√	11.6662
1575	RS5(52)-RS5(66)	VGFGYGKAR(7)-AMEKAR(4)	8	2.81e-06			√	√	9.62319
1576	PYRH(234)-PYRH(222)	VVMGEKEGTLITE(6)-VFNMNKPGALR(6)	8	3.67e-06			√	√	13.0042
1577	YFIF(55)-YFIF(25)	DDKQSQPR(3)-SDDDSDKR(7)	8	4.68e-06					n.a.
1578	ODP1(368)-ODP1(376)	GGHDPKK(6)-KAQETK(1)	8	5.53e-06			√	√	12.1914
1579	CAPP(855)-CAPP(789)	QAEKEGQEPDPR(4)-LVDKALWPLGK(4)	8	7.16e-06			√	√	17.7985
1580	CARB(202)-CARB(993)	GLDLSPTKELLIDESLIGWK(8)-LVNKVHEGRPHIQDR(4)	8	7.82e-06			√		31.209
1581	SURA(293)-SURA(252)	HILLKPSPIMTDEQAR(5)-KGDIVGPIR(1)	8	8.71e-06			√		61.388
1582	PFLB(725)-PFLB(2)	EMLLDAMENPEKYPQLTIR(12)-SELNEK(1)	8	9.12e-06			√		59.2918
1583	FKBA(116)-FKBA(69)	SSAQAKMEK(6)-EQEKLGIK(4)	8	1.09e-05			√	√	8.57979
1584	RL2(242)-RL2(207)	NFGKHPVTPWGVQTK(4)-VLGKAGAAR(4)	8	1.11e-05			√	√	21.323
1585	NUSG(125)-NUSG(121)	PKTLFEPGEMVR(2)-LQQVGDKPR(7)	8	1.16e-05					n.a.
1586	SSB(63)-SSB(44)	VVLFGKLAEVASEYLR(6)-DKATGEMK(2)	8	1.93e-05			√	√	18.6679
1587	NUOJ(179)-NUOJ(172)	KTEEHA(1)-KDDSAK(1)	8	2.35e-05					n.a.
1588	RS10(82)-RS10(59)	LVDIVEPTEKTVDALMR(10)-FTVLISPHVNKDAR(11)	8	2.98e-05			√		49.1706
1589	GLTB(1468)-GLTB(1461)	SSDVKALLGHR(5)-FALVKPK(5)	8	3.7e-05					n.a.
1590	HNS(32)-HNS(2)	ECTLETLEEMLEKLEVVVNER(13)-SEALK(1)	8	4.08e-05			√	√	15.5547
1591	RL9(22)-RL9(112)	VANLGSLGDQVNVKAGYAR(14)-DIADAVTAAGVEVAKSEVR(15)	8	4.81e-05			√	√	20.8607
1592	RHO(100)-RHO(1)	TGDTISGKIRPPK(8)-MNLTELK(1)	8	6.73e-05			√	√	8.82429
1593	RS3(49)-RS3(108)	ELAKASVSR(4)-KPELDAK(1)	8	7.47e-05			√	√	14.0316
1594	TIG(368)-TIG(392)	VKGLIEEMASAYEDPK(2)-NKELMDNMR(2)	8	8.47e-05			√	√	13.151
1595	RPOC(325)-RPOC(334)	PLKSLADMIK(3)-GKQGR(2)	8	0.000179			√	√	8.57879
1596	RL5(88)-RL5(120)	QGYPIGCKVTLR(8)-GLSAKSFDGR(5)	8	0.000355			√	√	21.4064
1597	PUR8(19)-PUR8(83)	YGDKVSALR(4)-IKTIER(2)	8	0.000408	√		√	√	15.4891
1598	PYRF(119)-PYRF(2)	EALVPFGKDAPLLIAVTVLTSMEASDLVDLGMTLSPADYAER(8)-TLTASSSSR(1)	7	8.04e-12					n.a.
1599	DEOD(57)-DEOD(84)	KISVMGHGMGIPSCSIYTK(1)-ELITDFGVKK(9)	7	2.85e-11	√		√	√	12.4609
1600	ATPA(432)-ATPA(419)	VTELLKQK(6)-KQLDHGQK(1)	7	1.06e-10			√	√	20.1444
1601	KPYK2(160)-KPYK2(75)	VFTEVTVGGPLSNNKGINK(15)-HVAILGDLQGPKIR(12)	7	1.71e-10					n.a.
1602	IF2(141)-IF2(173),IF2(149)-IF2(173)	EAAEQAKR(7)-NAQAEKAR(6)	7	2.34e-10					n.a.
1603	ODP1(404)-ODP1(412)	GYGMGDAAEGKNIAHQVK(11)-KMNMDGVR(1)	7	5.42e-10			√	√	14.6996
1604	IDH(142)-IDH(387)	YYQGTPSPVKHPELTDMVIFR(10)-GMEGAINAKTVTYDFER(9)	7	5.51e-10			√	√	18.3483
1605	LIPA(44)-LIPA(56)	IKLPADSTR(2)-IQGIKAAMR(5)	7	1.23e-09					n.a.
1606	IF2(42)-IF2(2)	SADDSVSAQEKQTLIDHLNQK(11)-TDVTIK(1)	7	1.76e-09			√	√	12.0739
1607	SYA(74)-SYA(279)	AGGKHNDLENVGYTAR(4)-VTGATDLSNKSLR(10)	7	1.92e-09			√		24.3471
1608	CSPC(59)-CSPC(15)	TLAEGQNVEFEIQDGQKGPAAVNVTAI(17)-WFNESKGFGFITPADGSK(6)	7	2.42e-09					n.a.
1609	CAPP(676)-CAPP(789)	ENKDFVPYFR(3)-LVDKALWPLGK(4)	7	6.13e-09			√	√	15.6515
1610	YAIL(54)-YAIL(46)	DKQLSEQQK(2)-AAVEENKK(7)	7	6.46e-09					n.a.
1611	ODO2(148)-ODO2(300)	EDVEKHLAK(5)-IKELAVK(2)	7	1.04e-08					n.a.
1612	RL2(108)-RL2(68)	YILAPKGLK(6)-IVDFKR(5)	7	1.52e-08			√	√	13.9477
1613	RL2(108)-RL2(183)	YILAPKGLK(6)-KVEADCR(1)	7	1.86e-08			√		23.2304
1614	RPOB(900)-RPOB(909)	GETQLTPEEKLLR(10)-AIFGEKASDVK(6)	7	2.28e-08			√	√	9.1054
1615	RL25(46)-RL25(1)	EAPLAIELDHDKVMNMQAK(12)-MFTINAEVR(1)	7	2.56e-08			√	√	9.75571
1616	IF2(167)-IF2(141),IF2(167)-IF2(149)	VSNQQDDMTKNAQAEK(10)-EAAEQAKR(7)	7	3.32e-08					n.a.
1617	SYY(295)-SYY(321)	FFTFMSIEEINALEEEDKNSGKAPR(22)-LVHGEEGLQAAKR(12)	7	3.65e-08			√	√	21.6631
1618	CSRA(38)-CSRA(55)	IGVNAPKEVSVHR(7)-IQAEKSQQSSY(5)	7	3.73e-08			√	√	14.6377
1619	EFG(562)-EFG(153)	GIQEQLKAGPLAGYPVVDMGIR(7)-MGANFLKVVNQIK(7)	7	9.02e-08			√		63.8535
1620	PUR8(182)-PUR8(155)	THGQPATPSTIGKEMANVAYR(13)-QLIDGIKDLAVQYR(7)	7	9.73e-08					n.a.
1621	FKBA(257)-FKBA(270)	ADAKPEADAK(4)-AADSAKK(7)	7	1.44e-07					n.a.
1622	ENO(62)-ENO(6)	FLGKGVTK(4)-IVKIIGR(3)	7	1.45e-07			√		26.567
1623	TALB(193)-TALB(187)	KEYAPAEDPGVVSVSEIYQYYK(1)-ILDWYKANTDK(6)	7	2.19e-07			√	√	4.64301
1624	MAO2(52)-MAO2(1)	DLALAYSPGVAAPCLEIEKDPLK(19)-MDDQLK(1)	7	2.43e-07					n.a.
1625	ODP1(327)-ODP1(369)	LIQLMNETVDGDYQTFKSK(17)-KIYAAFK(1)	7	2.48e-07			√	√	19.266
1626	YHGF(89)-YHGF(1)	LTDDLAKAINATLSK(7)-MMNDSFCR(1)	7	4.95e-07					n.a.
1627	ACON2(35)-ACON2(77)	PLDANQMAALVELLKNPPAGEEEFLLDLLTNR(15)-GEAKSPLLTPEK(4)	7	6.55e-07			√	√	6.34273
1628	ODP2(456)-ODP2(531)	KLDVKITPVVFIMK(5)-ELMTISKK(7)	7	9.39e-07					n.a.
1629	ACCC(442)-ACCC(449)	IMNDENFQHGGTNIHYLEKK(19)-LGLQEK(6)	7	2.12e-06			√	√	13.0885
1630	MURA(88)-MURA(48)	DVNVFCAPYDLVKTMR(13)-LKDVDTSMK(2)	7	2.62e-06			√	√	12.7031
1631	ORN(154)-ORN(138)	WKPEILDGFTKQGTHQAMDDIR(11)-YLDVSTLKELAR(8)	7	3.73e-06			√	√	11.2217
1632	GARR(126)-GARR(228)	GIDMLDAPVSGGEPKAIDGTLSVMVGGDK(15)-NFKPGFR(3)	7	4.03e-06					n.a.
1633	DBHA(67)-DBHA(67)	NPQTGKEIK(6)-NPQTGKEIK(6)	7	4.18e-06					n.a.
1634	TIG(327)-TIG(287)	FGGNEKQALELPR(6)-VKSQAIEGLVK(2)	7	6.25e-06			√		30.3343
1635	YGGL(87)-YGGL(93)	KWLEER(1)-KLDEVR(1)	7	6.86e-06					n.a.
1636	YECJ(2)-YECJ(40)	SQPLNADQELVSDVVACQLVIK(1)-EKMSSQLK(2)	7	7.84e-06					n.a.
1637	SYL(289)-SYL(186)	NTKVAEAEMATMEK(3)-KEIPQWFIK(1)	7	7.94e-06			√	√	9.88874
1638	RS15(71)-RS15(73)	LLDYLKR(6)-KDVAR(1)	7	1.23e-05			√	√	5.03299
1639	RL30(56)-RL30(6)	GMINAVSFMVKVEE(11)-TIKITQTR(3)	7	1.98e-05			√	√	6.94435
1640	RL29(44)-RL29(9)	MQAASGQLQQSHLLKQVR(15)-EKSVEELNTELLNLLR(2)	7	2.07e-05			√	√	20.9681
1641	RS1(272)-RS1(279)	QLGEDPWVAIAKR(12)-YPEGTKLTGR(6)	7	2.11e-05			√	√	14.5015
1642	EFG(375)-EFG(507)	EEIKEVR(4)-HAKQSGGR(3)	7	2.99e-05			√		82.5322
1643	EFTU1(391)-EFTU1(300)	TVGAGVVAKVLG(9)-PGTIKPHTK(5)	7	3e-05	√		√	√	10.8658
1644	RL2(183)-RL2(265)	KVEADCR(1)-TDKFIVR(3)	7	3.57e-05			√	√	7.17576
1645	IMDH(396)-IMDH(383)	GMGSLGAMSKGSSDR(10)-SYKSYR(3)	7	3.65e-05					n.a.
1646	ENO(405)-ENO(180)	VAKYNQLIR(3)-TVKEAIR(3)	7	6.44e-05			√	√	11.8614
1647	RS3(86)-RS3(108)	GEDVEKLR(6)-KPELDAK(1)	7	6.47e-05			√		24.4215
1648	SYW(151)-SYW(181)	YAENINAGLFDYPVLMAADILLYQTNLVPVGEDQKQHLELSR(35)-VPEPFIPKSGAR(8)	7	7.55e-05					n.a.
1649	YCHN(54)-YCHN(79)	GQKPGEGYNIQQMLEILTAQNVPVK(3)-LCKTCTDGR(3)	7	8.83e-05					n.a.
1650	PHOL(329)-PHOL(281)	IVNAYEAWEEAEQKR(14)-NTKSGLR(3)	7	9.16e-05					n.a.
1651	CARB(993)-CARB(379)	LVNKVHEGRPHIQDR(4)-LTTQMKSVGEVMAIGR(6)	7	9.22e-05			√		32.0023
1652	IF2(131)-IF2(194)	EAQQKAER(5)-KLEEEAR(1)	7	0.000104					n.a.
1653	DAPA(242)-DAPA(287)	LMPLHNKLFVEPNPIPVK(7)-AALKHAGLL(4)	7	0.000117			√	√	12.0382
1654	GLNH(147)-GLNH(153)	SGTGSVDYAKANIK(10)-TKDLR(2)	7	0.000166			√	√	11.2198
1655	YNCE(251)-YNCE(251)	AFITDSKAAEVLVVDTR(7)-AFITDSKAAEVLVVDTR(7)	7	0.000363			√	√	0
1656	GREA(1)-GREA(63)	MQAIPMTLR(1)-IKDIEAK(2)	7	0.000537					n.a.
1657	RL10(105)-RL10(97)	ANAKFEVK(4)-LFKEFAK(3)	7	0.000635			√	√	5.16488
1658	RPOA(1)-RPOA(297)	MQGSVTEFLKPR(1)-TPNLGKK(6)	7	0.00148			√		54.8911
1659	YDGH(234)-YDGH(207)	FFETQSSKGGR(8)-AALAAGGEAAKK(11)	6	5.28e-16					n.a.
1660	ISCU(42)-ISCU(59)	NVGSFDNNDENVGSGMVGAPACGDVMKLQIK(27)-FKTYGCGSAIASSSLVTEWVK(2)	6	2.35e-15			√	√	4.68186
1661	ODP2(302)-ODP2(396)	QEAAAPAPAAKAEAPAAAPAAK(11)-VDFSKFGEIEEVELGR(5)	6	4.41e-14					n.a.
1662	RL28(44)-RL28(26)	FWVESEKR(7)-SHALNATKR(8)	6	2.73e-12			√		43.1262
1663	CARB(993)-CARB(963)	LVNKVHEGRPHIQDR(4)-VVDLAAKLLK(7), LVNKVHEGR(4)-VVDLAAKLLK(7)	6	7.24e-12			√		23.9434
1664	PHSM(154)-PHSM(583)	QSFVDGKQVEAPDDWHR(7)-AAPGYYLAKNIIFAINK(9)	6	9.07e-12			√	√	6.94892
1665	MSRB(82)-MSRB(2)	YIKDLSHGMQR(3)-ANKPSAEELKK(1)	6	2.52e-10					n.a.
1666	EFG(686)-EFG(643)	ASYTMEFLKYDEAPSNVAQAVIEAR(9)-GMLKGQESEVTGVK(4)	6	2.72e-10	√		√	√	13.8283
1667	RS12(108)-RS12(108)	GALDCSGVKDR(9)-GALDCSGVKDR(9)	6	5.93e-10			√	√	0
1668	HEM2(247)-HEM2(217)	ESLLDEAQGADCLMVKPAGAYLDIVR(16)-KSYQMNPMNR(1)	6	6.85e-10			√	√	14.2351
1669	FABI(43)-FABI(205)	EGAELAFTYQNDKLK(13)-KMLAHCEAVTPIR(1)	6	1.34e-09			√		25.5547
1670	APT(23)-APT(90)	SIQDYPKPGILFR(7)-KPGKLPR(4)	6	5.63e-09			√	√	14.0346
1671	ACCA(18)-ACCA(46)	SLNFLDFEQPIAELEAKIDSLTAVSR(17)-EKSVELTR(2)	6	5.99e-09					n.a.
1672	EFG(159)-EFG(507)	VVNQIKTR(6)-HAKQSGGR(3)	6	1.31e-08			√		85.4619
1673	SYV(194)-SYV(178)	ESKGSMWHIR(3)-LVNWDPKLR(7)	6	1.32e-08					n.a.
1674	PT1(1)-PT1(404)	MISGILASPGIAFGK(1)-KEIEIYK(1)	6	2.74e-08			√		61.3223
1675	IDH(62)-IDH(12)	KISWMEIYTGEK(1)-VVVPAQGKK(8)	6	3.21e-08	√		√	√	10.4073
1676	SUHB(251)-SUHB(266)	VVKAMLANMR(3)-DELSDALKR(8)	6	3.95e-08					n.a.
1677	IMDH(428)-IMDH(424)	LKEIIHQQMGGLR(2)-VAYKGR(4)	6	3.97e-08					n.a.
1678	SSRP(151)-SSRP(156)	EWQVDKAR(6)-IMKNAHR(3)	6	5.54e-08					n.a.
1679	CARB(397)-CARB(504)	TQQESLQKALR(8)-LAKLAGVR(3)	6	7.69e-08			√	√	16.3483
1680	TIG(154)-TIG(146)	EKDGAVEAEDR(2)-KQQATWK(1)	6	1.07e-07			√	√	15.8846
1681	RL22(16)-RL22(42)	SSAQKVR(5)-KAAVLVK(1)	6	1.39e-07			√	√	8.23275
1682	SYV(898)-SYV(930)	EVAKIEGEISR(4)-EKLEGYAEAK(2)	6	2.47e-07					n.a.
1683	RL1(200)-RL1(54)	AKPTQAKGVYIK(2)-KSDQNVR(1)	6	2.81e-07			√	√	9.42308
1684	FABI(201)-FABI(2)	TLAASGIKDFR(8)-GFLSGK(1)	6	4.75e-07			√		25.2682
1685	DNAK(452)-DNAK(514)	AADNKSLGQFNLDGINPAPR(5)-ASSGLNEDEIQKMVR(12)	6	5.92e-07			√	√	11.5129
1686	YRAP(168)-YRAP(191)	EAKAAADIASR(3)-VTTAFTFIK(9)	6	9.65e-07					n.a.
1687	RS8(2)-RS8(33)	SMQDPIADMLTR(1)-LKVAIANVLK(2)	6	1.59e-06			√	√	11.7789
1688	ATPA(118)-ATPA(426)	VVNTLGAPIDGKGPLDHDGFSAVEAIAPGVIER(12)-QLDHGQKVTELLK(7)	6	2.45e-06			√		40.4115
1689	PYRH(222)-PYRH(212)	VFNMNKPGALR(6)-DHKLPIR(3)	6	4.29e-06			√		27.1006
1690	RS17(43)-RS17(16)	TTKLHVHDENNECGIGDVVEIR(3)-VVSDKMEK(5)	6	4.79e-06			√	√	14.0559
1691	PTA(71)-PTA(38)	ANSSTTTAAEPLKMSYVEGLLSSNQK(13)-LSVFKPIAQPR(5)	6	5.9e-06					n.a.
1692	RS1(522)-RS1(450)	AKDEADEKDAIATVNK(2)-KGAIVTGK(1)	6	5.98e-06			√	√	11.6226
1693	IMDH(428)-IMDH(383)	LKEIIHQQMGGLR(2)-SYKSYR(3)	6	7.07e-06					n.a.
1694	CARB(412)-CARB(397)	GLEVGATGFDPKVSLDDPEALTK(12)-TQQESLQKALR(8)	6	7.49e-06			√	√	18.5352
1695	RS8(2)-RS8(31)	SMQDPIADMLTR(1)-AAVTMPSSKLK(9)	6	9.04e-06			√	√	14.1358
1696	PYRH(10)-PYRH(2)	PVYKR(4)-ATNAK(1)	6	1.06e-05	√				n.a.
1697	RS15(2)-RS15(73)	SLSTEATAK(1)-KDVAR(1)	6	1.31e-05			√		24.8262
1698	FIS(32)-FIS(1)	DSVKQALK(4)-MFEQR(1)	6	2.13e-05			√		30.2484
1699	RPOC(983)-RPOC(959)	NTELKLIDEFGR(5)-GSIKLSNVK(4)	6	2.22e-05			√	√	4.8715
1700	CH60(51)-CH60(34)	SFGAPTITKDGVSVAR(9)-VTLGPKGR(6)	6	2.23e-05	√		√	√	6.56079
1701	CH60(42)-CH60(28)	NVVLDKSFGAPTITK(6)-GVNVLADAVKVTLGPK(10)	6	2.76e-05			√	√	19.4655
1702	RS14(47)-RS14(19)	WNAVLKLQTLPR(6)-VALADKYFAK(6), AIISDVNASDEDRWNAVLKLQTLPR(19)-VALADKYFAK(6)	6	4.27e-05			√	√	13.6037
1703	MDH(82)-MDH(82)	KPGMDR(1)-KPGMDR(1)	6	6.71e-05			√	√	0
1704	RL2(59)-RL2(265)	HIGGGHKQAYR(7)-TDKFIVR(3)	6	6.88e-05			√		35.45
1705	LIPA(56)-LIPA(37)	IQGIKAAMR(5)-KPEWMK(1)	6	7e-05					n.a.
1706	G6PD(309)-G6PD(228)	VPGYLEEEGANKSSNTETFVAIR(12)-WGYFDKAGQMR(6)	6	8.79e-05					n.a.
1707	PNTA(162)-PNTA(21)	FFTGQITAAGKVPPAK(11)-VAATPKTVEQLLK(6)	6	0.000125			√	√	10.5193
1708	RL19(14)-RL19(2)	QLEQEQMKQDVPSFRPGDTVEVK(8)-SNIIK(1)	6	0.000138			√	√	14.0257
1709	SYGB(18)-SYGB(146)	TFLVEIGTEELPPKALR(14)-LPIPKLMR(5)	6	0.000161					n.a.
1710	G3P1(321)-G3P1(132)	LVSWYDNETGYSNKVLDLIAHISK(14)-DNTPMFVKGANFDK(8)	6	0.000162			√	√	6.7431
1711	PYRH(212)-PYRH(2)	DHKLPIR(3)-ATNAK(1)	6	0.000201					n.a.
1712	RS8(56)-RS8(31)	EEGFIEDFKVEGDTKPELELTLK(15)-AAVTMPSSKLK(9), EEGFIEDFKVEGDTKPELELTLK(15)-AAVTMPSSKLKVAIANVLK(9)	6	0.000277			√	√	10.869
1713	RS2(143)-RS2(132)	ELEKLENSLGGIK(4)-KEALMR(1)	6	0.000284			√	√	15.4366
1714	CH60(327)-CH60(321)	VVINKDTTTIIDGVGEEAAIQGR(5)-ATLEDLGQAKR(10)	6	0.000405			√	√	16.1498
1715	SYM(597)-SYM(671)	VALIENAEFVEGSDKLLR(15)-DIFLLSPDAGAKPGHQVK(12)	6	0.000411					n.a.
1716	RS9(100)-RS9(115)	KAGFVTR(1)-KVGLR(1)	6	0.000705			√		33.379
1717	PYRG(534)-PYRG(318)	DGHPLFAGFVKAASEFQK(11)-HGGLKNR(5)	6	0.000937			√	√	8.6839
1718	SUCC(135)-SUCC(56)	VVFMASTEGGVEIEKVAEETPHLIHK(15)-GKAGGVK(2)	6	0.00132			√	√	15.8063
1719	IF3(164)-IF3(123)	VKDDLQELAVVESFPTKIEGR(17)-FLEEGDKAK(7)	6	0.00302			√	√	19.6957
1720	HTPG(516)-HTPG(524)	VKALLGER(2)-VKDVR(2)	6	0.00317	√		√	√	8.83651
1721	IF2(756)-IF2(665)	KVIEAESLDLR(1)-EVKLAR(3)	6	0.00396			√		37.0233
1722	GATR(48)-GATR(86)	FLEQKGVVTR(5)-FQLASAPKNR(8)	5	3.06e-16					n.a.
1723	LPP(59)-LPP(75)	SDVQAAKDDAAR(7)-LDNMATKYR(7)	5	3.45e-11			√		25.4013
1724	OPGG(144)-OPGG(75)	VLYPINSKDKNDEIVSMLGASYFR(10)-AYWNNLKTPFK(7)	5	9.04e-11					n.a.
1725	SYK1(114)-SYK1(82)	DDLPEGVYNEQFKK(13)-IMGKASFVTLQDVGGR(4)	5	1.56e-10			√	√	10.0571
1726	ATPA(265)-ATPA(175)	DRGEDALIIYDDLSKQAVAYR(15)-QTGKTALAIDAIINQR(4)	5	2.66e-10			√	√	13.845
1727	LRP(36)-LRP(162)	ISNVELSKR(8)-LVIKTR(4)	5	2.96e-10			√	√	18.9006
1728	IF2(173)-IF2(194)	NAQAEKAR(6)-KLEEEAR(1)	5	4e-10					n.a.
1729	YIDC(389)-YIDC(382)	MLQPKIQAMR(5)-AQYTSMAKMR(8)	5	6.12e-10					n.a.
1730	FSAA(168)-FSAA(168)	VLAASFKTPR(7)-VLAASFKTPR(7)	5	7.45e-10			√	√	0
1731	IF2(184)-IF2(194)	EQEAAELKR(8)-KLEEEAR(1)	5	8.05e-10					n.a.
1732	PGK(176)-PGK(302)	FADVACAGPLLAAELDALGKALK(20)-NAKTILWNGPVGVFEFPNFR(3)	5	1.02e-09			√	√	11.077
1733	YNHG(141)-YNHG(218)	VGQKIPNPTWTPTAGIR(4)-MNAPDIKALFSSVR(7)	5	2.78e-09					n.a.
1734	ODP2(366)-ODP2(313)	EDVQAYVKEAIK(8)-AEAPAAAPAAKAEGK(11)	5	5.52e-09					n.a.
1735	AMPA(134)-AMPA(185)	QAVETAKETLYSFDQLK(7)-AIQHGLAIAAGIKAAK(13)	5	5.62e-09			√	√	8.52755
1736	IMDH(411)-IMDH(428)	YFQSDNAADKLVPEGIEGR(10)-LKEIIHQQMGGLR(2)	5	5.72e-09					n.a.
1737	RPOB(1065)-RPOB(1057)	IQPGDKMAGR(6)-VYLAVKR(6)	5	6.88e-09			√	√	16.1514
1738	RLMG(130)-RLMG(143)	KVVTSDTR(1)-IIAGAKAR(6)	5	2.76e-08			√		27.2267
1739	AHPC(153)-AHPC(186)	IKAAQYVASHPGEVCPAK(2)-EGEATLAPSLDLVGKI(15)	5	5.08e-08					n.a.
1740	PARE(2)-PARE(334)	TQTYNADAIEVLTGLEPVR(1)-MQDPQFAGQTKER(11)	5	5.6e-08					n.a.
1741	AROC(355)-AROC(355)	AQNADVKTDIPR(7)-AQNADVKTDIPR(7)	5	7.92e-08					n.a.
1742	RPOB(719)-RPOB(697)	AVAVDSGVTAVAKR(13)-ADKPLVGTGMER(3)	5	9.07e-08			√		23.5885
1743	PGK(193)-PGK(179)	PMVAIVGGSKVSTK(10)-ALKEPAR(3)	5	1.12e-07			√		26.5276
1744	PTA(665)-PTA(419)	ATVFIFPDLNTGNTTYKAVQR(17)-TVKAAAICAER(3)	5	1.19e-07					n.a.
1745	EFTU1(177)-EFTU1(57),EFTU2(177)-EFTU2(57)	GSALKALEGDAEWEAK(5)-AFDQIDNAPEEKAR(12)	5	1.49e-07	√		√	√	20.5298
1746	ENO(103)-ENO(62)	IMIDLDGTENKSK(11)-FLGKGVTK(4)	5	1.83e-07			√	√	17.4686
1747	SYY(230)-SYY(238)	LHQNQVFGLTVPLITKADGTK(16)-FGKTEGGAVWLDPK(3)	5	2.03e-07			√	√	10.0773
1748	FABI(17)-FABI(43)	ILVTGVASKLSIAYGIAQAMHR(9)-EGAELAFTYQNDKLK(13)	5	2.18e-07			√	√	14.7565
1749	PNP(661)-PNP(657)	VEKVTDYLQMGQEVPVK(3)-EGLVHISQIADKR(12)	5	2.22e-07			√	√	10.8461
1750	RS8(2)-RS8(89)	SMQDPIADMLTR(1)-KDELPK(1)	5	3.09e-07			√		30.1624
1751	T1MK(12)-T1MK(1)	LWKLCDNLR(3)-MNNNDLVAK(1)	5	4.2e-07			√	√	18.8836
1752	DLDH(106)-DLDH(2)	VINQLTGGLAGMAKGR(14)-STEIK(1)	5	5.29e-07			√		23.4236
1753	RL23(19)-RL23(82)	APHVSEKASTAMEK(7)-KAYVTLK(1)	5	5.89e-07			√	√	11.4275
1754	BCP(40)-BCP(114)	VLVYFYPKAMTPGCTVQACGLR(8)-SFMGKTYDGIHR(5)	5	5.91e-07					n.a.
1755	ODP1(558)-ODP1(368)	EQVAYYKEDEK(7)-GGHDPKK(6)	5	7.54e-07			√		37.3698
1756	EFTS(207)-EFTS(24)	EYQVQLDIAMQSGKPK(14)-TGAGMMDCKK(9)	5	9.86e-07			√	√	20.2714
1757	EFPL(40)-EFPL(51)	GAATLYKMR(7)-TGLKVEER(4)	5	1e-06					n.a.
1758	RL7/12(101)-RL7/12(71)	EGVSKDDAEALKK(5)-VAVIKAVR(5)	5	1.03e-06			√	√	20.0592
1759	MDH(312)-MDH(82)	DIALGEEFVNK(11)-KPGMDR(1)	5	1.04e-06			√		24.2874
1760	CH60(242)-CH60(272)	EMLPVLEAVAKAGK(11)-GIVKVAAVK(4)	5	1.83e-06			√	√	9.96801
1761	EFTU1(391)-EFTU1(264)	TVGAGVVAKVLG(9)-KLLDEGR(1)	5	1.89e-06			√		23.4598
1762	EFTU1(300)-EFTU1(264),EFTU2(300)-EFTU2(264)	PGTIKPHTK(5)-KLLDEGR(1)	5	2.8e-06			√		22.4445
1763	FIS(25)-FIS(25)	VNSDVLTVSTVNSQDQVTQKPLR(20)-VNSDVLTVSTVNSQDQVTQKPLR(20)	5	3.12e-06			√	√	0
1764	RPOC(603)-RPOC(1247)	AISKMLNTCYR(4)-LQGVKINDK(5)	5	4.89e-06			√	√	14.2889
1765	RL28(26)-RL28(61)	SHALNATKR(8)-VIDKK(4)	5	5.74e-06			√		32.9126
1766	EFTU1(295)-EFTU1(264),EFTU2(295)-EFTU2(264)	GQVLAKPGTIKPHTK(6)-KLLDEGR(1)	5	5.82e-06			√		22.3747
1767	RL14(114)-RL14(44)	FMKIISLAPEVL(3)-ITIKEAIPR(4)	5	9.09e-06			√		23.1002
1768	RL4(74)-RL4(1)	SGSIKSPIWR(5)-MELVLK(1)	5	9.15e-06			√		53.6911
1769	RS3(89)-RS3(80)	KVVADIAGVPAQINIAEVR(1)-KGEDVEK(1)	5	1.13e-05			√	√	14.157
1770	NRDD(320)-NRDD(323)	IAGLGKNR(6)-KTAVFPK(1)	5	1.15e-05					n.a.
1771	FKBA(179)-FKBA(116)	GTLIDGKEFDNSYTR(7)-SSAQAKMEK(6)	5	1.51e-05			√	√	20.7349
1772	NFUA(100)-NFUA(97)	KVADDAPLMER(1)-APNAKMR(5)	5	1.77e-05					n.a.
1773	RS3(49)-RS3(80)	ELAKASVSR(4)-KGEDVEK(1)	5	2.05e-05			√	√	11.935
1774	DNAK(321)-DNAK(352)	SIEPLKVALQDAGLSVSDIDDVILVGGQTR(6)-KVAEFFGK(1)	5	2.42e-05			√	√	12.9287
1775	RL1(54)-RL1(157)	KSDQNVR(1)-NAKAGQVR(3)	5	2.87e-05			√		27.5345
1776	RLUB(173)-RLUB(222)	TIKFSGGEGINQWYNVTLTEGR(3)-YGDIPLPKGLPR(8)	5	2.92e-05			√	√	20.5741
1777	SYGB(592)-SYGB(112)	VSNILAKSDEVLSDR(7)-LTTDKGEWLLYR(5)	5	3.35e-05					n.a.
1778	GLMM(392)-GLMM(412)	YTAGSGDPLEHESVKAVTAEVEAALGNR(15)-KSGTEPLIR(1)	5	3.48e-05	√				n.a.
1779	DNAK(55)-DNAK(70)	TTPSIIAYTQDGETLVGQPAKR(21)-QAVTNPQNTLFAIKR(14)	5	3.53e-05			√	√	16.03
1780	CARB(504)-CARB(495)	LAKLAGVR(3)-KGFADAR(1)	5	3.65e-05			√	√	16.3154
1781	GLNH(109)-GLNH(248)	AIDFSDGYYKSGLLVMVK(10)-WFGTEPK(7)	5	4.41e-05			√	√	12.0282
1782	RL28(54)-RL28(61)	VSAKGMR(4)-VIDKK(4)	5	4.62e-05			√	√	9.74563
1783	TYPA(337)-TYPA(114)	LNKELVHNVALR(3)-FVTKK(4)	5	5.28e-05					n.a.
1784	RL7/12(60)-RL7/12(71)	TEFDVILKAAGANK(8)-VAVIKAVR(5)	5	5.67e-05			√	√	15.4775
1785	YFIF(63)-YFIF(55)	KWEDSPWR(1)-DDKQSQPR(3)	5	5.76e-05					n.a.
1786	EFG(440)-EFG(132)	LAKEDPSFR(3)-QANKYK(4)	5	6.02e-05			√		23.1109
1787	TYPA(427)-TYPA(114)	KGDLKNMNPDGK(5)-FVTKK(4)	5	8.39e-05					n.a.
1788	UPP(26)-UPP(26)	EQDISTKR(7)-EQDISTKR(7)	5	9.17e-05	√		√	√	0
1789	ENO(393)-ENO(419)	SGETEDATIADLAVGTAAGQIKTGSMSR(22)-IEEALGEKAPYNGR(8)	5	0.000113			√	√	21.5763
1790	YIFE(15)-YIFE(2)	YFDNKHYPR(5)-AESFTTTNR(1)	5	0.000123					n.a.
1791	UPP(70)-UPP(208)	KITVVPILR(1)-IFGTK(5)	5	0.000141			√	√	13.4703
1792	TIG(327)-TIG(232)	FGGNEKQALELPR(6)-AAKFAINLK(3)	5	0.000147			√		44.7784
1793	CH10(1)-CH10(13)	MNIRPLHDR(1)-VIVKR(4)	5	0.000151	√		√	√	14.2179
1794	RL24(47)-RL24(43)	HQKPVPALNQPGGIVEK(3)-VIVEGINLVKK(10)	5	0.000166			√	√	5.16678
1795	MALQ(508)-MALQ(129)	CMVIGEDLGTVPVEIVGKLR(18)-VIVAPKR(6)	5	0.000257					n.a.
1796	6PGD(93)-6PGD(75)	PYLDKGDIIIDGGNTFFQDTIR(5)-ILLMVKAGAGTDAAIDSLK(6)	5	0.000265			√		25.2209
1797	HNS(57)-HNS(2)	KLQQYR(1)-SEALK(1)	5	0.000426					n.a.
1798	RS1(1)-RS1(247)	MTESFAQLFEESLK(1)-VLKFDR(3)	5	0.000516					n.a.
1799	GALF(180)-GALF(188)	MPGDLSEYSVIQTKEPLDR(14)-EGKVSR(3)	5	0.00123					n.a.
1800	RPOD(264)-RPOD(220)	LVPKQFDYLVNSMR(4)-EKFAELR(2)	5	0.00157			√	√	19.8333
1801	CLPB(451)-CLPB(530)	LDMLNEELSDKER(11)-NKVTDAEIAEVLAR(2)	5	0.00157					n.a.
1802	TATA(86)-TATA(82)	HDKEQV(3)-TEDAKR(5)	5	0.00171					n.a.
1803	HNS(6)-HNS(2)	SEALKILNNIR(5)-SEALK(1)	5	0.0026			√	√	5.90925
1804	TRER(18)-TRER(8)	LSGVGKSTVSR(6)-LTIKDIAR(4)	5	0.00388					n.a.
1805	FKBA(76)-FKBA(69)	LDKDQLIAGVQDAFADK(3)-EQEKLGIK(4)	5	0.0041			√	√	15.7802
1806	CARB(527)-CARB(397)	DQYDLHPVYKR(10)-TQQESLQKALR(8)	4	4.17e-20			√	√	14.6723
1807	RSUA(40)-RSUA(5)	NAAFKLLPEHDVAYDGNPLAQQHGPR(5)-LDKFIAQQLGVSR(3)	4	1.12e-17			√	√	10.0662
1808	NRDD(199)-NRDD(245)	MGNAEIEPPKSISTATAVTAQIIAQVASHIYGGTTINR(10)-KTAEEWNIPDAEGYANSR(1)	4	1.18e-13					n.a.
1809	TIG(361)-TIG(342)	TNELKADEER(5)-ELFEEQAKR(8)	4	3.01e-12			√		23.3795
1810	G3P1(124)-G3P1(331)	VVMTGPSKDNTPMFVK(8)-VLDLIAHISK(10)	4	7.34e-12			√		25.3549
1811	MURF(111)-MURF(311)	VVALTGSSGKTSVK(10)-AGLANLKAVPGR(7)	4	1.42e-11			√	√	15.5015
1812	K1PF(99)-K1PF(32)	LTEKDGEVTDFNFSGFEVTPADWER(4)-GEVNLVKTTGLHAAGK(7)	4	2.3e-11					n.a.
1813	KBL(244)-KBL(90)	VDIITGTLGKALGGASGGYTAAR(10)-FICGTQDSHKELEQK(10)	4	3.23e-10			√	√	21.2104
1814	SYN(114)-SYN(194)	VEVAGWVEDPDTYPMAAKR(18)-NDQGKVDFDKDFFGK(5)	4	3.51e-10					n.a.
1815	BETB(236)-BETB(51)	KVMANSAASSLK(1)-AVKSAQQGQK(3)	4	6.11e-09					n.a.
1816	NANA(71)-NANA(2)	EQVLEIVAEEAKGK(12)-ATNLR(1)	4	7.19e-09			√	√	12.0872
1817	RL3(55)-RL3(123)	AIQVTTGAKK(9)-GFAGTVKR(7)	4	8.96e-09			√		32.8407
1818	YJJK(45)-YJJK(2)	IGVLGLNGAGKSTLLR(11)-AQFVYTMHR(1)	4	9.62e-09			√		25.9196
1819	TALB(187)-TALB(301)	ILDWYKANTDKK(6)-KFAIDQEK(1)	4	9.97e-09			√	√	19.4521
1820	AMPA(185)-AMPA(147)	AIQHGLAIAAGIKAAK(13)-TNKSEPR(3)	4	1.28e-08			√	√	19.7742
1821	SMTA(22)-SMTA(218)	NIYGTTKGQLR(7)-EKHQQR(2)	4	1.74e-08					n.a.
1822	INSE1(52)-INSE1(52),INSE2(52)-INSE2(52),INSE3(52)-INSE3(52),INSE4(52)-INSE4(52),INSE5(52)-INSE5(52)	SKQQNQQTSSER(2)-SKQQNQQTSSER(2)	4	2.16e-08					n.a.
1823	RL3(62)-RL3(55)	VTKPEAGHFAK(3)-AIQVTTGAKK(9)	4	2.88e-08			√	√	11.5391
1824	YBIB(269)-YBIB(93)	QDTAGSELLPQAKDPETTAQWIER(13)-KQANLTPLLAILLHK(1)	4	3.29e-08					n.a.
1825	RNE(235)-RNE(189)	QDIGEILIDNPKVLELAR(12)-LKHWEAIK(2)	4	3.66e-08			√		24.7097
1826	OPGG(142)-OPGG(201)	VLYPINSKDK(8)-PKPTDKR(6)	4	1.52e-07			√	√	13.3754
1827	ODO2(156)-ODO2(133)	APAKESAPAAAAPAAQPALAAR(4)-LLAEHNLDASAIKGTGVGGR(13)	4	1.67e-07					n.a.
1828	RL2(71)-RL2(183)	NKDGIPAVVER(2)-KVEADCR(1)	4	2.55e-07			√		24.5643
1829	HNS(32)-HNS(6)	ECTLETLEEMLEKLEVVVNER(13)-SEALKILNNIR(5)	4	2.58e-07			√	√	11.1515
1830	RPOB(1158)-RPOB(2)	QKVDLSTFSDEEVMR(2)-VYSYTEK(1)	4	2.73e-07			√	√	9.80838
1831	F16PA(253)-F16PA(201)	NLLKGGIYLYPSTASHPDGK(4)-GKTYSINEGNYIK(2)	4	3.19e-07			√	√	8.27792
1832	OPDA(28)-OPDA(2)	ILPEHVVPAVTKALNDCR(12)-TNPLLTPFELPPFSK(1)	4	4.36e-07					n.a.
1833	RPIA(8)-RPIA(1)	KAVGWAALQYVQPGTIVGVGTGSTAAHFIDALGTMK(1)-MTQDELK(1)	4	5.33e-07					n.a.
1834	SLYA(95)-SLYA(73)	LTEKAEPLISEMEAVINK(4)-TLDQLEEKGLISR(8)	4	6.22e-07					n.a.
1835	RPOB(1035)-RPOB(1032)	KITQGDDLAPGVLK(1)-KLEAKR(5)	4	8.43e-07			√	√	4.5039
1836	RS3(49)-RS3(79)	ELAKASVSR(4)-PGIVIGKK(7)	4	1.06e-06	√		√	√	9.82782
1837	ATPG(31)-ATPG(34)	AMEMVAASKMR(9)-KSQDR(1)	4	1.07e-06			√	√	5.12469
1838	NAPA(437)-NAPA(444)	LPADMVVTNEKHR(11)-DICEKK(5)	4	1.07e-06			√	√	10.4264
1839	PFLB(454)-PFLB(643)	TMLYAINGGVDEKLK(13)-DQKGAVASLTSVAK(3)	4	1.42e-06			√		34.2445
1840	UBID(96)-UBID(96)	LLAFLKEPEPPK(6)-LLAFLKEPEPPK(6)	4	1.48e-06			√	√	0
1841	PNP(397)-PNP(51)	TDTFLFHYNFPPYSVGETGMVGSPKR(25)-AKPGQDFFPLTVNYQER(2)	4	1.99e-06			√		24.0613
1842	GUAA(366)-GUAA(309)	SHHNVGGLPKEMK(10)-KIIGR(1)	4	2.06e-06					n.a.
1843	PTNAB(184)-PTNAB(305)	WTKETNVSR(3)-KVSTDPK(1)	4	2.11e-06			√	√	15.727
1844	GLNB(58)-GLNB(9)	GAEYMVDFLPKVK(11)-IDAIIKPFK(6)	4	2.19e-06			√	√	5.43911
1845	SYD(81)-SYD(586)	ARDEKNINR(5)-KAENN(1)	4	2.21e-06			√		70.6545
1846	TIG(287)-TIG(342)	VKSQAIEGLVK(2)-ELFEEQAKR(8)	4	2.33e-06			√	√	16.8173
1847	NFSA(234)-NFSA(141)	PFILDYLHKQGWATR(9)-NNIEAVTKLLK(8)	4	2.42e-06			√	√	12.5745
1848	IF2(141)-IF2(155),IF2(149)-IF2(155)	EAAEQAKR(7)-EAAEKDK(5)	4	2.81e-06					n.a.
1849	RS2(115)-RS2(132)	LKDLETQSQDGTFDK(2)-KEALMR(1)	4	2.95e-06			√	√	19.1526
1850	FKBA(127)-FKBA(69)	DAADNEAKGK(8)-EQEKLGIK(4)	4	3.36e-06			√	√	19.8379
1851	IF2(186)-IF2(155)	KAEEEAR(1)-EAAEKDK(5)	4	3.8e-06					n.a.
1852	FKBA(179)-FKBA(110)	GTLIDGKEFDNSYTR(7)-VKSSAQAK(2)	4	4.94e-06			√		25.8945
1853	YIDA(98)-YIDA(177)	FLEKLSR(4)-EKYTVLK(2)	4	9.54e-06			√	√	15.458
1854	KPYK2(75)-KPYK2(223)	HVAILGDLQGPKIR(12)-IVAKVER(4)	4	1.08e-05					n.a.
1855	IF2(125)-IF2(194)	EAEESAKR(7)-KLEEEAR(1)	4	1.26e-05					n.a.
1856	SYV(926)-SYV(633)	APEAVIAKER(8)-DINWDMKR(7)	4	1.53e-05					n.a.
1857	ODO2(94)-ODO2(152)	SEEKASTPAQR(4)-HLAKAPAK(4)	4	1.76e-05					n.a.
1858	CH60(272)-CH60(34)	GIVKVAAVK(4)-VTLGPKGR(6)	4	2.35e-05			√		39.8039
1859	RL1(157)-RL1(14)	NAKAGQVR(3)-EKVDATK(2)	4	2.37e-05			√		32.734
1860	RL1(167)-RL1(157)	NDKNGIIHTTIGK(3)-NAKAGQVR(3)	4	2.68e-05			√		27.1828
1861	MAO2(267)-MAO2(1)	TLDDVIEGADIFLGCSGPKVLTQEMVK(19)-MDDQLK(1)	4	2.73e-05					n.a.
1862	RL4(139)-RL4(132)	LKDMALEDVLIITGELDENLFLAAR(2)-TKLLAQK(2)	4	2.81e-05			√	√	9.69568
1863	RS3(45)-RS3(79)	QYLTKELAK(5)-PGIVIGKK(7)	4	3.2e-05			√	√	16.4003
1864	UPP(26)-UPP(12)	EQDISTKR(7)-HPLVKHK(5)	4	3.93e-05			√	√	19.4426
1865	NUOG(642)-NUOG(276)	FFQVYDPAYYDSKTVMLESWR(13)-FGYGYVNLKDRPR(9)	4	5.03e-05					n.a.
1866	SYI(436)-SYI(583)	AQSLKEIK(5)-GKAPYR(2)	4	5.19e-05					n.a.
1867	LON(761)-LON(741)	DLEEIPDNVIADLDIHPVKR(19)-TVLIPFENKR(9)	4	7.58e-05			√	√	10.8788
1868	RL14(59)-RL14(44)	KGDVLKAVVVR(6)-ITIKEAIPR(4)	4	7.78e-05			√	√	12.3877
1869	RL4(57)-RL4(63)	AEVTGSGKKPWR(8)-QKGTGR(2)	4	8.68e-05			√	√	8.90183
1870	DNAK(155)-DNAK(268)	QATKDAGR(4)-EAAEKAK(5)	4	8.81e-05			√		32.2474
1871	RS20(16)-RS20(71)	AIQSEKAR(6)-NKAAR(2)	4	9.97e-05			√	√	21.2509
1872	EFTU1(209)-EFTU1(57),EFTU2(209)-EFTU2(57)	AIDKPFLLPIEDVFSISGR(4)-AFDQIDNAPEEKAR(12)	4	0.000109	√		√		26.152
1873	RL27(19)-RL27(24)	DSEAKR(5)-LGVKR(4)	4	0.000122	√		√	√	11.8122
1874	PUR8(362)-PUR8(19)	NLGVGIGYALIAYQSTLKGVSK(18)-YGDKVSALR(4)	4	0.000128			√	√	12.2325
1875	ODO1(54)-ODO1(71)	STFQQLPGTGVKPDQFHSQTR(12)-LAKDASR(3)	4	0.000139	√				n.a.
1876	RL2(150)-RL2(68)	PGKGGQLAR(3)-IVDFKR(5), NIPVGSTVHNVEMKPGKGGQLAR(17)-IVDFKR(5)	4	0.000141			√	√	4.28928
1877	TYPA(337)-TYPA(324)	LNKELVHNVALR(3)-EGKFVTSR(3)	4	0.000148					n.a.
1878	ODO1(559)-ODO1(552)	LQELAKR(6)-VEMKR(4)	4	0.000151			√	√	10.7135
1879	GLMS(604)-GLMS(231)	NLAKSVTVE(4)-TGAEVKR(6)	4	0.00016			√		25.4067
1880	YHES(569)-YHES(562)	LEKEMEK(3)-KEIAR(1)	4	0.000186					n.a.
1881	CH60(207)-CH60(390)	GYLSPYFINKPETGAVELESPFILLADK(10)-VGAATEVEMKEK(10)	4	0.000227			√	√	9.26409
1882	IF2(131)-IF2(173)	EAQQKAER(5)-NAQAEKAR(6)	4	0.000285					n.a.
1883	KDSA(47)-KDSA(265)	ICEHYVTVTQKLGIPYVFK(11)-LEPFLKQMK(6)	4	0.000294			√	√	9.94833
1884	RS9(22)-RS9(13)	VFIKPGNGK(4)-KSSAAR(1), VFIKPGNGKIVINQR(4)-KSSAAR(1)	4	0.000314			√		25.1152
1885	RS9(2)-RS9(115)	AENQYYGTGR(1)-KVGLR(1)	4	0.000394			√		41.4563
1886	PURU(29)-PURU(17)	ITNICYKHELNIVQNNEFVDHR(7)-TICPDQKGLIAR(7)	4	0.000435					n.a.
1887	PFLB(162)-PFLB(162)	CRKSGVLTGLPDAYGR(3)-KSGVLTGLPDAYGR(1)	4	0.000529			√	√	0
1888	RISA(77)-RISA(175)	ITNLGDLKVGDWVNVER(8)-KLGAR(1)	4	0.000533			√	√	15.8319
1889	ODP2(587)-ODP2(587)	SAMEPVWNGKEFVPR(10)-SAMEPVWNGKEFVPR(10)	4	0.00081					n.a.
1890	EFG(375)-EFG(425)	EEIKEVR(4)-TKADQEK(2)	4	0.000826			√		44.5941
1891	RS2(81)-RS2(73)	AASEAVKDAALSCDQFFVNHR(7)-ILFVGTKR(7)	4	0.000866			√	√	7.84008
1892	YQJD(38)-YQJD(42)	SKEELSKIR(7)-SKAEQALK(2)	4	0.00128					n.a.
1893	RL33(50)-RL33(30)	QHVIYKEAK(6)-TKPEKLELK(2)	4	0.00273			√	√	13.8346
1894	UPP(203)-UPP(116)	AHPDVELYTASIDQGLNEHGYIIPGLGDAGDKIFGTK(32)-NEETLEPVPYFQKLVSNIDER(13)	3	1.72e-13			√	√	12.8372
1895	6PGD(454)-6PGD(293)	DYFGAHTYKR(9)-YISSLKDQR(6)	3	3.16e-13			√	√	12.3433
1896	RL9(112)-RL9(1)	DIADAVTAAGVEVAKSEVR(15)-MQVILLDK(1)	3	1.31e-11			√		23.832
1897	RL29(44)-RL29(54)	MQAASGQLQQSHLLKQVR(15)-VKTLLNEK(2)	3	2.28e-11			√	√	15.2379
1898	PFLB(162)-PFLB(107)	KSGVLTGLPDAYGR(1)-IVGLQTEAPLKR(11)	3	3.17e-11			√		32.276
1899	EFTU1(314)-EFTU1(295),EFTU2(314)-EFTU2(295)	FESEVYILSKDEGGR(10)-GQVLAKPGTIKPHTK(6)	3	1.98e-10			√		33.7298
1900	PFLB(57)-PFLB(312)	NYTPYEGDESFLAGATEATTTLWDKVMEGVK(25)-ITEQEAQEMVDHLVMKLR(16)	3	9.55e-10			√	√	12.5983
1901	ENO(66)-ENO(105)	GVTKAVAAVNGPIAQALIGK(4)-SKFGANAILAVSLANAK(2)	3	1.17e-09			√	√	9.33301
1902	FRMA(361)-FRMA(222)	GDIDLEPFVTHTMSLDEINDAFDLMHEGKSIR(29)-IIAIDTNPKK(9)	3	1.36e-09					n.a.
1903	TYPA(50)-TYPA(253)	VMDSNDLEKER(9)-VGKVLGHLGLER(3)	3	1.39e-09					n.a.
1904	EFTU1(10)-EFTU1(314),EFTU2(10)-EFTU2(314)	TKPHVNVGTIGHVDHGK(2)-FESEVYILSKDEGGR(10)	3	2.03e-09			√	√	11.2495
1905	SYV(600)-SYV(909)	TEKQFPNGIEPHGTDALR(3)-IENKLANEGFVAR(4)	3	2.11e-09					n.a.
1906	RL5(78)-RL5(69)	SVAGFKIR(6)-PLITKAR(5)	3	4.12e-09			√	√	11.2302
1907	RS3(219)-RS3(108)	GEILGGMAAVEQPEKPAAQPK(15)-KPELDAK(1)	3	5.18e-09			√		34.7296
1908	MALQ(129)-MALQ(129)	VIVAPKR(6)-VIVAPKR(6)	3	5.28e-09					n.a.
1909	SECY(250)-SECY(347)	IVVNYAKR(7)-ETADNLKK(7)	3	7.03e-09			√	√	13.1947
1910	SURA(269)-SURA(252)	SGVGFHILKVNDLR(9)-KGDIVGPIR(1)	3	9.07e-09			√	√	8.24267
1911	SYQ(160)-SYQ(170)	SVEENLALFEKMR(11)-AGGFEEGKACLR(8)	3	1.19e-08			√	√	11.2474
1912	YIDA(193)-YIDA(177)	SAPYFLEILDKR(11)-EKYTVLK(2)	3	1.29e-08			√	√	6.21286
1913	SYT(122)-SYT(577)	TLTQEDVEALEKR(12)-NEKIGFK(3)	3	1.5e-08			√		52.3097
1914	EFTS(10)-EFTS(24)	AEITASLVKELR(9)-TGAGMMDCKK(9)	3	1.54e-08			√	√	8.6954
1915	AROA(22)-AROA(340)	VDGTINLPGSKSVSNR(11)-VKETDR(2)	3	3.31e-08			√	√	14.835
1916	SYI(205)-SYI(410)	SALAEAEVEYYDKTSPSIDVAFQAVDQDALK(13)-HKTPIIFR(2)	3	3.39e-08					n.a.
1917	MDH(107)-MDH(134)	NLVQQVAKTCPK(8)-KAGVYDK(1)	3	3.6e-08			√	√	11.2693
1918	TOLA(161)-TOLA(168)	AAEEAAKK(7)-AAADAKK(6)	3	3.89e-08					n.a.
1919	YEEX(33)-YEEX(33)	EIQDVEKK(7)-EIQDVEKK(7)	3	8.34e-08					n.a.
1920	ARLY(283)-ARLY(2)	VTSGSSLMPQKK(11)-ALWGGR(1)	3	9.64e-08					n.a.
1921	RL7/12(101)-RL7/12(121)	EGVSKDDAEALKK(5)-ALEEAGAEVEVK(12)	3	9.66e-08			√	√	0.111324
1922	RL3(70)-RL3(38)	VTKPEAGHFAKAGVEAGR(11)-VTQVKDLANDGYR(5)	3	1.13e-07			√	√	10.1766
1923	COABC(292)-COABC(289)	KQATQGDELTIK(1)-AATVAPEKIK(8)	3	1.26e-07					n.a.
1924	ODO2(85)-ODO2(300)	EGNSAGKETSAK(7)-IKELAVK(2)	3	1.59e-07					n.a.
1925	RS4(177)-RS4(156)	EKPTWLEVDAGKMEGTFK(12)-VKAALELAEQR(2)	3	2.01e-07			√	√	9.34942
1926	PNP(571)-PNP(571)	IKDVIGKGGSVIR(7)-DVIGKGGSVIR(5)	3	2.29e-07					n.a.
1927	DLDH(237)-DLDH(255)	FNLMLETKVTAVEAK(8)-EDGIYVTMEGKK(11)	3	3.15e-07			√	√	8.91746
1928	DBHB(18)-DBHB(1)	IAAGADISKAAAGR(9)-MNKSQLIDK(1)	3	3.78e-07			√	√	15.8855
1929	EFG(607)-EFG(497)	KAKPVLLEPIMK(1)-QKVTDVEGK(2)	3	3.97e-07			√	√	8.71256
1930	RLMG(116)-RLMG(143)	VPKTLALLEQQLR(3)-IIAGAKAR(6)	3	4.34e-07			√	√	10.8827
1931	CARB(379)-CARB(313)	LTTQMKSVGEVMAIGR(6)-SSALASKATGFPIAK(7)	3	4.71e-07			√		22.4065
1932	GUAA(381)-GUAA(418)	MGLVEPLKELFKDEVR(12)-KEYCDLLR(1)	3	5.71e-07			√		32.5792
1933	RS1(272)-RS1(247)	QLGEDPWVAIAKR(12)-VLKFDR(3)	3	6.69e-07					n.a.
1934	AHPC(80)-AHPC(171)	LGVDVYAVSTDTHFTHKAWHSSSETIAK(17)-WKEGEATLAPSLDLVGK(2)	3	8.5e-07					n.a.
1935	PFLB(107)-PFLB(63)	IVGLQTEAPLKR(11)-VMEGVKLENR(6)	3	8.99e-07			√	√	13.9888
1936	CDD(208)-CDD(168)	SHMPYSKSPSGVALECK(7)-DYLPDAFGPKDLEIK(10)	3	1.01e-06			√	√	16.5753
1937	IF1(64)-IF1(42)	VTVELTPYDLSKGR(12)-KNYIR(1)	3	1.05e-06			√		22.6936
1938	SYM(403)-SYM(403)	NAGFINKR(7)-NAGFINKR(7)	3	1.14e-06			√	√	0
1939	OPGG(55)-OPGG(413)	DMKYADYQQIQFNHDK(3)-STGDVKQSNLIR(6)	3	1.27e-06					n.a.
1940	KPYK1(286)-KPYK1(145)	VVITATQMLDSMIKNPR(14)-VICKVLNNGDLGENK(4), VVITATQMLDSMIKNPRPTR(14)-VICKVLNNGDLGENK(4)	3	1.42e-06			√		22.2537
1941	T1RK(554)-T1RK(536)	IHVATVQSLVKR(11)-GLTDKFPEDSTK(5)	3	1.65e-06					n.a.
1942	LPTC(187)-LPTC(177)	TSYEIQNKQTQP(8)-NAELIEKVR(7)	3	1.73e-06					n.a.
1943	PUR7(103)-PUR7(211)	AAGSLVKR(7)-MDKDR(3)	3	1.84e-06			√	√	16.7792
1944	RL7/12(71)-RL7/12(1)	VAVIKAVR(5)-MSITK(1)	3	2.06e-06					n.a.
1945	RL2(97)-RL2(183)	SANIALVLYKDGER(10)-KVEADCR(1)	3	2.28e-06			√		32.9083
1946	EFTS(222)-EFTS(24)	KFTGEVSLTGQPFVMEPSK(1)-TGAGMMDCKK(9)	3	2.82e-06			√		28.5771
1947	UDP(235)-UDP(2)	TQQEIPNAETMKQTESHAVK(12)-SKSDVFHLGLTK(1)	3	2.92e-06			√	√	9.89707
1948	NRDD(359)-NRDD(320)	QLALECASKR(9)-IAGLGKNR(6)	3	3.12e-06					n.a.
1949	FKBA(257)-FKBA(110)	ADAKPEADAK(4)-VKSSAQAK(2)	3	4e-06					n.a.
1950	IHFB(27)-IHFB(1)	TVEDAVKEMLEHMASTLAQGER(7)-MTKSELIER(1)	3	4.25e-06			√	√	14.8313
1951	AAT(63)-AAT(37)	KAEQYLLENETTKNYLGIDGIPEFGR(13)-INLGIGVYKDETGK(9)	3	4.68e-06			√	√	11.406
1952	RPOB(890)-RPOB(909)	VTPKGETQLTPEEK(4)-AIFGEKASDVK(6)	3	4.81e-06			√	√	11.0461
1953	PHOL(90)-PHOL(1)	GQIQDIEPEQIHLAIKEAR(16)-MNIDTR(1)	3	9.01e-06					n.a.
1954	RHO(283)-RHO(181)	AYNTVVPASGKVLTGGVDANALHRPK(11)-GLIVAPPKAGK(8)	3	1.13e-05			√		26.7824
1955	RPOC(585)-RPOC(557)	AILWMIVPKGLPYSIVNQALGK(9)-ITEYEKDANGELVAK(6)	3	1.22e-05			√	√	8.50945
1956	EFTU1(238)-EFTU1(264),EFTU2(238)-EFTU2(264)	GIIKVGEEVEIVGIK(4)-KLLDEGR(1)	3	1.3e-05			√	√	13.9577
1957	RS10(30)-RS10(59)	LIDQATAEIVETAKR(14)-FTVLISPHVNKDAR(11)	3	1.34e-05			√		52.4413
1958	YBEL(3)-YBEL(39)	MNKVAQYYR(3)-VIKTGELTR(3)	3	1.58e-05					n.a.
1959	RRF(162)-RRF(170)	SQDDVQKLTDAAIK(7)-KIEAALADK(1)	3	2.19e-05			√	√	12.3656
1960	RS9(27)-RS9(2)	VFIKPGNGKIVINQR(9)-AENQYYGTGR(1)	3	2.36e-05			√	√	19.1407
1961	IMDH(411)-IMDH(383)	YFQSDNAADKLVPEGIEGR(10)-SYKSYR(3)	3	2.5e-05					n.a.
1962	YAJQ(108)-YAJQ(112)	QGIESATQKK(9)-IVKMIK(3)	3	2.56e-05					n.a.
1963	SYT(577)-SYT(570)	NEKIGFK(3)-VKADLR(2)	3	2.8e-05			√	√	16.9779
1964	PCKA(448)-PCKA(509)	MQAAGAQAYLVNTGWNGTGKR(20)-NTYASPEQWQEKAETLAK(12)	3	2.86e-05			√	√	15.4187
1965	G3P1(108)-G3P1(108)	KHITAGAK(1)-KHITAGAK(1)	3	3.13e-05			√	√	0
1966	RS6(56)-RS6(104)	LHKAHYVLMNVEAPQEVIDELETTFR(3)-HAVTEASPMVKAK(11)	3	3.46e-05			√	√	18.7718
1967	MENB(98)-MENB(89)	GDYGGYKDDSGVHHLNVLDFQR(7)-AFCSGGDQKVR(9)	3	4.14e-05			√	√	9.21375
1968	DEOC(254)-DEOC(5)	ALGHGDGKSASSY(8)-TDLKASSLR(4)	3	4.41e-05					n.a.
1969	RS14(97)-RS14(76)	GEIPGLKK(7)-KFGLSR(1)	3	4.44e-05			√	√	13.6869
1970	RS6(56)-RS6(106)	LHKAHYVLMNVEAPQEVIDELETTFR(3)-AKDER(2)	3	5.18e-05			√	√	13.8368
1971	CAPP(693)-CAPP(855)	SATPEQELGKLPLGSR(10)-QAEKEGQEPDPR(4)	3	6.72e-05			√	√	15.1228
1972	PHOL(112)-PHOL(119)	AVNIKTK(5)-GVIKPR(4)	3	7.41e-05					n.a.
1973	RS3(16)-RS3(108)	LGIVKPWNSTWFANTK(5)-KPELDAK(1)	3	7.7e-05			√	√	11.8469
1974	YIFE(80)-YIFE(2)	VWSKYMTR(4)-AESFTTTNR(1)	3	7.78e-05					n.a.
1975	RS7(149)-RS7(136)	MAEANKAFAHYR(6)-GTAVKK(5)	3	9.34e-05			√	√	17.1245
1976	GRCA(26)-GRCA(62)	AANDDLLNSFWLLDSEKGEAR(17)-EVPVEVKPEVR(7)	3	9.52e-05					n.a.
1977	SYGA(281)-SYGA(301)	TLTKAVAEAYYASR(4)-EALGFPMCNKDK(10)	3	0.000104					n.a.
1978	SDHA(267)-SDHA(281)	GEGGYLLNKHGER(9)-YAPNAKDLAGR(6)	3	0.000123			√	√	17.5935
1979	RPOB(260)-RPOB(279)	GETASFDIEANGKVYVEK(13)-QLEKDDVK(4)	3	0.000127			√	√	13.0041
1980	EFTU2(391)-EFTU2(300)	TVGAGVVAKVLS(9)-PGTIKPHTK(5)	3	0.000159			√	√	12.1388
1981	APT(39)-APT(53)	DVTSLLEDPKAYALSIDLLVER(10)-YKNAGITK(2)	3	0.000161			√	√	17.0962
1982	RS2(143)-RS2(2)	ELEKLENSLGGIK(4)-ATVSMR(1)	3	0.000161			√		36.9336
1983	YAEP(32)-YAEP(1)	YAEIASGDLGYVPDALGCVLKVLNEMAADDALSEAVR(21)-MEKYCELIR(1)	3	0.000201					n.a.
1984	PPK(463)-PPK(378)	YAHIGTGNFNEKTAR(12)-VAKDSR(3)	3	0.00021			√	√	8.39791
1985	ALKH(212)-ALKH(202)	EAVEGAKL(7)-ITKLAR(3)	3	0.000213	√		√	√	15.6555
1986	EFG(354)-EFG(440)	VYSGVVNSGDTVLNSVKAAR(17)-LAKEDPSFR(3)	3	0.000232			√	√	14.033
1987	SECF(2)-SECF(313)	AQEYTVEQLNHGR(1)-VEKEGADQPSILP(3)	3	0.00031					n.a.
1988	HEM2(247)-HEM2(213)	ESLLDEAQGADCLMVKPAGAYLDIVR(16)-EAAGSALKGDR(8)	3	0.000386			√	√	20.8508
1989	PUR8(19)-PUR8(366)	YGDKVSALR(4)-GVSKLEVNR(4)	3	0.000387			√	√	18.8356
1990	HSCB(119)-HSCB(123)	LESFIKR(6)-KMFDTR(1)	3	0.000465			√	√	6.03909
1991	RNB(1)-RNB(68)	MFQDNPLLAQLK(1)-IIAVIHSEKER(9)	3	0.000532					n.a.
1992	YQIC(6)-YQIC(1)	KIEQIAR(1)-MIDPK(1)	3	0.000543					n.a.
1993	ACON2(20)-ACON2(7)	AAEGIAPKPLDANQMAALVELLK(8)-KHVAER(1)	3	0.000731			√	√	11.8947
1994	CISY(405)-CISY(310)	TVGWIAHWSEMHSDGMKIAR(17)-VYKNYDPR(3)	3	0.000748			√	√	18.4489
1995	RS2(37)-RS2(2)	NKVHIINLEK(2)-ATVSMR(1)	3	0.00092			√		29.8715
1996	PYRG(233)-PYRG(262)	IALFCNVPEKAVISLK(10)-SQGLDDYICKR(10)	3	0.00236			√	√	12.1035
[truncated: 15 more rows]
