# Supplementary material for: Trifunctional cross-linker for mapping protein-protein interaction networks and comparing protein conformational states
Source: eLife journal article supplement (doi:10.7554/elife.12509), 2016-03-03
Supplement: supp [file elife-12509-supp-v1.zip › elife_poa_e12509_Figure_5_source_data_2.xlsx]

## Sheet: Sheet1
Figure 5—source data 2. CXMS analysis of E. coli ribo-free lysates
No.	Protein1-Protein2	Peptide1-Peptide2	#Spectra	Best E-value	Identified in the ppi database?	Structure in PDB?	Cα-Cα ≤ 22 Å?	Distance (Å)
Inter-molecular Cross-links
1	SUCC(146)-SUCD(256)	VAEETPHLIHKVALDPLTGPMPYQGR(11)-MGHAGAIIAGGKGTADEK(12)	594	8.76e-20	√	√	√	16.9687
2	RPOB(163)-RPOC(781)	SPGVFFDSDKGKTHSSGK(12)-KGLADTALK(1), GKTHSSGK(2)-KGLADTALK(1)	200	3.81e-18	√	√	√	20.9309
3	SUCD(241)-SUCC(1)	EHVTKPVVGYIAGVTAPKGK(18)-MNLHEYQAK(1), PVVGYIAGVTAPKGK(13)-MNLHEYQAK(1)	159	5.9e-19	√	√	√	15.3232
4	HNS(6)-STPA(2)	SEALKILNNIR(5)-SVMLQSLNNIR(1)	104	1.33e-11	√			n.a.
5	RPOB(844)-RPOC(66)	DTKLGPEEITADIPNVGEAALSK(3)-IFGPVKDYECLCGK(6)	100	2.97e-19	√	√	√	15.4453
6	RPOB(844)-RPOC(50)	DTKLGPEEITADIPNVGEAALSK(3)-TFKPER(3)	100	2.59e-06	√	√	√	11.8069
7	EFTS(222)-EFTU1(314),EFTS(222)-EFTU2(314)	KFTGEVSLTGQPFVMEPSK(1)-FESEVYILSKDEGGR(10)	78	7.42e-16	√	√	√	12.6018
8	RPOC(66)-RPOB(890)	IFGPVKDYECLCGK(6)-VTPKGETQLTPEEK(4)	66	3.19e-17	√	√	√	14.1501
9	DBHB(53)-DBHA(86)	EGDDVALVGFGTFAVKER(16)-ALKDAVK(3), ALDAIIASVTESLKEGDDVALVGFGTFAVKER(30)-ALKDAVK(3)	61	1.88e-14	√	√	√	11.0865
10	SUCC(146)-ILVC(326)	VAEETPHLIHKVALDPLTGPMPYQGR(11)-KLLTWREETGK(1)	60	8.21e-08				n.a.
11	FETP(28)-ERPA(2)	EAEGQDFQLYPGELGKR(16)-SDDVALPLEFTDAAANK(1)	58	1.67e-21				n.a.
12	GNSA(31)-GNSB(1)	NTGKEVSEIR(4)-MNIENLK(1)	57	7.81e-12				n.a.
13	RS6(93)-RS18(50)	TKHAVTEASPMVK(2)-AKYQR(2)	56	4.26e-07	√	√	√	11.6953
14	EFTU1(57)-DBHB(67),EFTU2(57)-DBHB(67)	AFDQIDNAPEEKAR(12)-NPQTGKEITIAAAK(6)	55	1.63e-18				n.a.
15	ACCA(2)-ACCD(8)	SLNFLDFEQPIAELEAK(1)-IKSNITPTR(2)	48	1.54e-11	√			n.a.
16	EFTS(281)-EFTU1(57),EFTS(281)-EFTU2(57)	VETDFAAEVAAMSKQS(14)-AFDQIDNAPEEKAR(12)	46	8.61e-16	√			n.a.
17	EFTU1(264)-G3P1(108),EFTU2(264)-G3P1(108)	KLLDEGR(1)-KHITAGAK(1)	46	1.12e-11				n.a.
18	RPOC(66)-RPOB(914)	IFGPVKDYECLCGK(6)-ASDVKDSSLR(5)	46	2.23e-09	√	√	√	18.1771
19	HNS(83)-MOAC(147)	EMLIADGIDPNELLNSLAAVKSGTKAK(21)-LLAKSGGKSGDFK(4)	46	6.01e-05				n.a.
20	SYD(214)-YMFM(1)	YYQIVKCFR(6)-MNSLTTHYRR(1)	46	0.000107				n.a.
21	SDHL(402)-SDHM(402)	NAIASVKAINAAR(7)-NAIAAVKAVNAAR(7)	44	4.69e-14	√			n.a.
22	NOHA(152)-PQIB(427),NOHD(152)-PQIB(427)	FPELENRHVDFLKR(13)-LMEALDKINK(7)	43	6.01e-08				n.a.
23	GRCA(88)-PFLB(63)	ETLEDAVKHPEK(8)-VMEGVKLENR(6)	41	3.1e-14	√			n.a.
24	HNS(57)-EFTU1(264),HNS(57)-EFTU2(264)	KLQQYR(1)-KLLDEGR(1)	41	6.09e-12				n.a.
25	PUR8(94)-A5A625|YIBV(104)	TTNHDVKAVEYFLK(7)-IKDKNK(2)	41	5.14e-07				n.a.
26	EFTU1(314)-G3P1(108),EFTU2(314)-G3P1(108)	FESEVYILSKDEGGR(10)-KHITAGAK(1)	40	1.38e-19				n.a.
27	EFTU1(57)-DBHA(67),EFTU2(57)-DBHA(67)	AFDQIDNAPEEKAR(12)-NPQTGKEIK(6)	39	1e-10				n.a.
28	RPOB(161)-RPOC(781)	SPGVFFDSDKGKTHSSGK(10)-KGLADTALK(1)	38	9.08e-14	√	√	√	19.5413
29	DBHB(67)-EFTU1(264),DBHB(67)-EFTU2(264)	NPQTGKEITIAAAK(6)-KLLDEGR(1)	37	1.69e-11				n.a.
30	RPOB(900)-RPOC(50)	GETQLTPEEKLLR(10)-TFKPER(3)	37	6.21e-07	√	√	√	20.5021
31	GNSB(31)-GNSA(1)	TGKEVTSIQFTAR(3)-MNIEELKK(1)	36	8.68e-16				n.a.
32	DLDH(106)-ODO2(300)	VINQLTGGLAGMAKGR(14)-IKELAVK(2)	36	2.61e-11	√			n.a.
33	DBHB(67)-DBHA(67)	NPQTGKEITIAAAK(6)-NPQTGKEIK(6)	36	3.61e-09	√			n.a.
34	HNS(87)-MOAC(147)	EMLIADGIDPNELLNSLAAVKSGTKAK(25)-LLAKSGGKSGDFK(4)	34	4.8e-05				n.a.
35	EFTS(207)-YIEL(268)	EYQVQLDIAMQSGKPK(14)-FNVRKDADGR(5)	33	1.38e-06				n.a.
36	DNAK(183)-GRPE(66)	IINEPTAAALAYGLDKGTGNR(16)-VKAEMENLR(2)	31	2e-17	√			n.a.
37	EFTS(207)-EFTU1(57),EFTS(207)-EFTU2(57)	EYQVQLDIAMQSGKPK(14)-AFDQIDNAPEEKAR(12)	31	3.77e-15	√			n.a.
38	RPOB(163)-RPOC(1132)	GKTHSSGK(2)-IPQESGGTKDITGGLPR(9), SPGVFFDSDKGKTHSSGK(12)-IPQESGGTKDITGGLPR(9)	31	1.37e-11	√	√	√	18.788
39	SODF(117)-SODM(68)	AQFTDAAIKNFGSGWTWLVK(9)-LDQLPADKK(8)	31	1.02e-07	√			n.a.
40	YBDZ(2)-ENTF(956)	AFSNPFDDPQGAFYILR(1)-KALPLPELK(1)	30	1.94e-14				n.a.
41	OPPA(398)-PSPA(81)	LLAEAGYTADKPLTINLLYNTSDLHKK(26)-AELALLKER(7)	29	2.23e-06				n.a.
42	RPOC(1192)-RPOB(191)	LVITPVDGSDPYEEMIPKWR(18)-GSWLDFEFDPKDNLFVR(11)	28	1.73e-19	√	√	√	21.4717
43	PT1(96)-YEEX(33)	DKHMTADAAAHEVIEGQASALEELDDEYLK(2)-EIQDVEKK(7)	28	3.16e-11				n.a.
44	IHFB(81)-IHFA(57)	YVPHFKPGK(6)-DKNQRPGR(2)	28	1.65e-06	√	√	√	16.0737
45	EFTS(177)-RL7(108)	HIAMHVAASKPEFIKPEDVSAEVVEK(10)-DDAEALKK(7)	28	1.91e-06				n.a.
46	ACCC(353)-EFTU1(314),ACCC(353)-EFTU2(314)	INAEDPNTFLPSPGKITR(15)-FESEVYILSKDEGGR(10)	27	5.35e-18				n.a.
47	ARGR(45)-HDED(18)	FSSQGEIVAALQEQGFDNINQSKVSR(23)-FDLEMLKK(7)	26	7.52e-11				n.a.
48	UDP(235)-FOLX(62)	TQQEIPNAETMKQTESHAVK(12)-TVTKNIIQHVENNR(4)	24	1.05e-13				n.a.
49	RPOB(1306)-RPOC(9)	MYKNIVDGNHQMEPGMPESFNVLLK(3)-FLKAQTK(3)	23	0.000111	√	√		31.9938
50	CH10(34)-PLSX(261)	SAGGIVLTGSAAAKSTR(14)-SQGEGKKR(7)	22	2.97e-07				n.a.
51	DBHB(53)-DBHA(67)	EGDDVALVGFGTFAVKER(16)-NPQTGKEIK(6)	22	1.49e-05	√			n.a.
52	RPOB(191)-RPOC(1072)	GSWLDFEFDPKDNLFVR(11)-TAGGKDLRPALK(5)	21	8.56e-09	√	√	√	9.02735
53	FABI(43)-EFTU1(264),FABI(43)-EFTU2(264)	EGAELAFTYQNDKLK(13)-KLLDEGR(1)	20	2.71e-17				n.a.
54	RPOC(66)-RPOB(900)	IFGPVKDYECLCGK(6)-GETQLTPEEKLLR(10)	20	1.55e-12	√	√	√	19.6713
55	DBHB(53)-CYTR(18)	EGDDVALVGFGTFAVKER(16)-DVALKAK(5)	20	4.03e-09				n.a.
56	HNS(83)-ARGR(1)	EMLIADGIDPNELLNSLAAVKSGTKAK(21)-MRSSAK(1)	20	6.98e-07				n.a.
57	FLIY(230)-G3P1(124)	QESGVALRKGNEDLLK(9)-VVMTGPSKDNTPMFVK(8), QESGVALRKGNEDLLK(9)-KVVMTGPSKDNTPMFVK(9)	20	1.44e-05				n.a.
58	G3P1(124)-YNCE(37)	VVMTGPSKDNTPMFVK(8)-KAVGK(1)	20	5.85e-05				n.a.
59	DBHA(67)-EFTU1(264),DBHA(67)-EFTU2(264)	NPQTGKEIK(6)-KLLDEGR(1)	19	6.63e-12				n.a.
60	YOEB(32)-YJJW(195)	INELIKDTR(6)-DNQQIKR(6)	19	6.41e-08				n.a.
61	RPOB(890)-RPOC(50)	VTPKGETQLTPEEK(4)-TFKPER(3)	19	2.44e-05	√	√	√	16.8095
62	GYRB(768)-YACG(2)	VTVKDAIAADQLFTTLMGDAVEPR(4)-SETITVNCPTCGK(1)	18	5.86e-29	√			n.a.
63	RPOC(521)-RPOA(1)	DCVNAKGEGMVLTGPK(6)-MQGSVTEFLKPR(1)	18	8.45e-24	√	√		50.8399
64	ACCA(239)-ACCD(8)	VNMLQYSTYSVISPEGCASILWKSADK(23)-IKSNITPTR(2)	18	7.13e-20	√			n.a.
65	RPOB(890)-NUSA(111)	VTPKGETQLTPEEK(4)-ITTQTAKQVIVQK(7)	18	2.4e-12	√			n.a.
66	STPA(117)-HNS(57)	TPKPIAQALAEGK(3)-KLQQYR(1)	18	5.46e-10	√			n.a.
67	DNAK(421)-GRPE(66)	NTTIPTKHSQVFSTAEDNQSAVTIHVLQGER(7)-VKAEMENLR(2)	17	1.47e-15	√			n.a.
68	RPOC(1132)-GREA(1)	IPQESGGTKDITGGLPR(9)-MQAIPMTLR(1)	17	6.4e-15	√			n.a.
69	RPOB(161)-RPOC(1132)	SPGVFFDSDKGKTHSSGK(10)-IPQESGGTKDITGGLPR(9)	17	1.27e-12	√	√	√	19.9617
70	DNAK(55)-SMTA(83)	TTPSIIAYTQDGETLVGQPAKR(21)-AKQAAEAK(2)	17	2.03e-12				n.a.
71	IHFA(66)-IHFB(81)	NPKTGEDIPITAR(3)-YVPHFKPGK(6)	17	1.48e-10	√	√		22.2013
72	GLND(575)-HNS(57)	DIQDPEVIKQFAEEVQTENRLR(9)-KLQQYR(1)	17	0.000142				n.a.
73	GLMM(147)-YIFB(135)	EISCVDSAELGKASR(12)-KIIVAK(1), LPDAVEEAIEAEMEKEISCVDSAELGKASR(27)-KIIVAK(1)	16	8.09e-17				n.a.
74	FRMA(361)-GLPC(282)	GDIDLEPFVTHTMSLDEINDAFDLMHEGKSIR(29)-LDEGKTLPLK(5)	16	0.000279				n.a.
75	DBHA(51)-DBHB(67)	EGDAVQLVGFGTFKVNHR(14)-NPQTGKEITIAAAK(6)	15	1.59e-12	√			n.a.
76	ODO2(2)-DLDH(237)	SSVDILVPDLPESVADATVATWHK(1)-FNLMLETKVTAVEAK(8)	15	7.72e-11	√			n.a.
77	EFG(153)-EFTU1(264),EFG(153)-EFTU2(264)	MGANFLKVVNQIK(7)-KLLDEGR(1)	15	1.8e-10	√			n.a.
78	RS2(131)-YIBG(150)	DLETQSQDGTFDKLTKK(16)-NKENP(2)	15	2e-06				n.a.
79	RAIA(80)-TUS(211)	HEDMYTAINELINKLERQLNK(14)-EEWQRKLER(6)	15	0.000921				n.a.
80	ODP2(442)-DLDH(256)	KQQNEEAAK(1)-KAPAEPQR(1)	14	8.57e-16	√			n.a.
81	STPA(66)-HNS(83)	ISTWLELMKADGINPEELLGNSSAAAPR(9)-EMLIADGIDPNELLNSLAAVKSGTK(21)	14	2.85e-13	√			n.a.
82	DPS(101)-YGEK(188)	AVQLGGVALGTTQVINSKTPLK(18)-LNIMKK(5)	14	5.84e-07				n.a.
83	G3P1(192)-YNCE(37)	TVDGPSHKDWR(8)-KAVGK(1)	14	1.27e-05				n.a.
84	HIS1(192)-YFBO(1)	EVEVIYRSKACLIQR(9)-MTPLER(1)	14	3.66e-05				n.a.
85	ODP2(313)-ODP1(368)	AEAPAAAPAAKAEGK(11)-GGHDPKK(6)	14	0.000126	√			n.a.
86	DNAK(55)-DHE4(394)	TTPSIIAYTQDGETLVGQPAKR(21)-LGWKAEK(4)	14	0.00015				n.a.
87	DNAK(55)-HIGB(10)	TTPSIIAYTQDGETLVGQPAKR(21)-ALKDAAEK(3)	13	3.02e-06				n.a.
88	PFLB(195)-HSLU(2)	VALYGIDYLMKDK(11)-SEMTPR(1)	13	1.56e-05				n.a.
89	GALU(262)-FUCA(207)	GKSHDCGNKLGYMQAFVEYGIR(2)-FKTYGLR(2)	13	1.69e-05				n.a.
90	SYK1(130)-GLPX2(256)	LFKTKTGELSIHCTELR(3)-RCKAMGVDVNR(3)	13	2.15e-05				n.a.
91	FABG(119)-RS10(1)	LSKAVMR(3)-MQNQR(1)	13	4.69e-05				n.a.
92	ODO1(54)-YGIB(14)	STFQQLPGTGVKPDQFHSQTR(12)-KNWSAR(1)	13	0.000272				n.a.
93	CRL(45)-EFTU1(264),CRL(45)-EFTU2(264)	FFFDCLAVCVNVKPAPEVR(13)-KLLDEGR(1)	12	6.13e-11				n.a.
94	OBG(131)-FKBA(110)	FKSSVNR(2)-VKSSAQAK(2)	12	4.59e-08				n.a.
95	ODP2(450)-DUT(3)	QQNEEAAKR(8)-KIDVK(1)	12	7e-08				n.a.
96	EFTU1(314)-EFTS(214),EFTU2(314)-EFTS(214)	FESEVYILSKDEGGR(10)-EIAEKMVEGR(5)	12	1.08e-07	√	√	√	21.6344
97	STPA(2)-HNS(120)	SVMLQSLNNIR(1)-TPAVIKK(6)	12	3.52e-07	√			n.a.
98	YFGF(426)-YAIL(47)	ITALDSHLKQFR(9)-KAQLER(1)	12	5.06e-06				n.a.
99	CPXR(188)-IDNR(1)	EHLSQEVLGKR(10)-MRNHR(1)	12	8.01e-06				n.a.
100	DBHA(83)-YOAA(263)	IAAANVPAFVSGKALK(13)-TELKDTQQLQK(4)	12	0.000206				n.a.
101	PT1(30)-YEEX(88)	KISADQVDQEVER(1)-NAELSKER(6)	11	6.68e-08				n.a.
102	EFTU1(57)-ACCC(22),EFTU2(57)-ACCC(22)	AFDQIDNAPEEKAR(12)-ACKELGIK(3)	11	2.75e-06				n.a.
103	MANA(132)-SUCD(256)	DPNHKPELVFALTPFLAMNAFR(5)-MGHAGAIIAGGKGTADEK(12)	11	2.07e-05				n.a.
104	CUSS(334)-YDGJ(2)	KMLNLADEVGK(1)-SDNIR(1)	11	9.18e-05				n.a.
105	HNS(83)-MSBB(4)	EMLIADGIDPNELLNSLAAVKSGTKAK(21)-METKK(4)	11	0.000225				n.a.
106	IPYR(116)-YOEB(26)	LSKEYDHIKDVNDLPELLK(3)-KINELIK(1)	11	0.000319				n.a.
107	ODP2(410)-EUTE(166)	IQKISGANLSR(3)-KVSQR(1)	11	0.000415				n.a.
108	IPYR(116)-HDFR(2)	LSKEYDHIKDVNDLPELLK(3)-DTELLK(1)	11	0.000894				n.a.
109	FRSA(42)-PTGA(133)	FNHGAQPPVQSALDGKTIPHWYR(16)-AKSTLTPVVISNMDEIK(2)	10	5.62e-19	√			n.a.
110	RPOC(1132)-GREA(63)	IPQESGGTKDITGGLPR(9)-IKDIEAK(2)	10	3.02e-12	√			n.a.
111	EFTU1(314)-DBHB(67),EFTU2(314)-DBHB(67)	FESEVYILSKDEGGR(10)-NPQTGKEITIAAAK(6)	10	5.8e-12				n.a.
112	HNS(32)-STPA(117)	ECTLETLEEMLEKLEVVVNER(13)-TPKPIAQALAEGK(3)	10	2.58e-11	√			n.a.
113	EFTS(214)-EFTU1(264),EFTS(214)-EFTU2(264)	EIAEKMVEGR(5)-KLLDEGR(1)	10	6.96e-08	√	√		62.2156
114	RL5(64)-CYSH(14)	LLDNAAADLAAISGQKPLITK(16)-LDLNALNELPKVDR(11)	10	1.64e-07				n.a.
115	YFHM(251)-ACFD(805)	NTREKLLLPLGDIK(5)-WKYQVENKPDDK(2)	10	2.04e-06				n.a.
116	ACCA(1)-YBDO(262)	MSLNFLDFEQPIAELEAK(1)-DFLNLKEIK(6)	10	1.37e-05				n.a.
117	DLDH(106)-F16PA(34)	VINQLTGGLAGMAKGR(14)-LGAKIIHRDINK(4)	10	2.68e-05				n.a.
118	DLDH(106)-ODP1(866)	VINQLTGGLAGMAKGR(14)-KVVADAIAK(1)	10	0.00013	√			n.a.
119	CH60(80)-YAEI(129)	EVASKANDAAGDGTTTATVLAQAIITEGLK(5)-PVGTEKNHLIGETLK(6)	10	0.000162				n.a.
120	SUCD(43)-RL9(112)	MVGGVTPGKGGTTHLGLPVFNTVR(9)-DIADAVTAAGVEVAKSEVR(15)	9	2.92e-11				n.a.
121	DBHB(67)-EFTS(214)	NPQTGKEITIAAAK(6)-EIAEKMVEGR(5)	9	4.71e-09				n.a.
122	ODP1(508)-DLDH(2),ODP1(508)-YQIC(80)	ALNVMLKNK(7)-STEIK(1)	9	4.7e-08	√			n.a.
123	FABI(43)-HEMX(95)	EGAELAFTYQNDKLK(13)-AELEGIIKQQAAQLK(8)	9	5.25e-06				n.a.
124	LEPA(290)-PTPD(8)	KVKPQVYAGLFPVSSDDYEAFR(1)-KDITR(1)	9	5.25e-06				n.a.
125	RS17(43)-TORC(190)	TTKLHVHDENNECGIGDVVEIR(3)-KQFDELR(1)	9	9.63e-06				n.a.
126	IF2(756)-YGJP(98)	KVIEAESLDLR(1)-AKVEIR(2)	9	1.02e-05				n.a.
127	RPOB(844)-DEOC(1)	DTKLGPEEITADIPNVGEAALSK(3)-MTDLKASSLR(1)	9	4.72e-05				n.a.
128	DBHB(67)-DBHA(86)	NPQTGKEITIAAAK(6)-ALKDAVK(3)	9	6.46e-05	√			n.a.
129	YIBA(234)-FTSI(448)	KNTVYDDIIEAAGELGDK(1)-PLSITKVDPPVPGER(6)	9	0.000103				n.a.
130	YCEB(44)-YIHX(1)	HNNFSKDIGLPGVADAHIVLTNLTSQIGR(6)-MLYIFDLGNVIVDIDFNR(1)	9	0.000172				n.a.
131	TYPA(396)-YBJL(365)	KQEPYENVTLDVEEQHQGSVMQALGER(1)-VKTIADR(2)	9	0.000205				n.a.
132	CSRA(38)-FLII(2)	IGVNAPKEVSVHR(7)-TTRLTR(1)	9	0.000331				n.a.
133	EFP(31)-YHBT(4)	IMLDGEPYAVEASEFVKPGK(17)-MLDKLR(4)	9	0.000403				n.a.
134	PMBA(272)-HIPB(34)	KSTFLLDSLGK(1)-KIGIK(1)	9	0.000566				n.a.
135	SYGB(18)-HYPE(217)	TFLVEIGTEELPPKALR(14)-DIPGVKALR(6)	8	2.57e-09				n.a.
136	IHFA(86)-IHFB(3)	VVTFRPGQKLK(9)-MTKSELIER(3)	8	2.34e-08	√	√	√	14.7002
137	EFTS(177)-RPIA(7)	HIAMHVAASKPEFIKPEDVSAEVVEK(10)-TQDELKK(6)	8	5.87e-06				n.a.
138	EFTU1(57)-ARAG(191),EFTU2(57)-ARAG(191)	AFDQIDNAPEEKAR(12)-ELRKEGR(4)	8	3.76e-05				n.a.
139	ELFC(753)-RL14(54)	IALDAASLKR(9)-KGDVLK(1)	8	4.05e-05				n.a.
140	TRXB(87)-SYM(440)	FETEIIFDHINKVDLQNR(12)-EFGKAVR(4)	8	5.1e-05				n.a.
141	TALB(301)-SYD(214)	KFAIDQEKLEK(1)-YYQIVKCFR(6)	8	0.000174				n.a.
142	MURQ(282)-YNCI(260)	KRLDQHGGFIR(1)-KLCVALSFR(1)	8	0.000535				n.a.
143	EFTU1(137)-EFTS(52),EFTU2(137)-EFTS(52)	QVGVPYIIVFLNKCDMVDDEELLELVEMEVR(13)-KAGNVAADGVIK(1)	7	4.51e-22	√	√	√	18.9786
144	STPA(32)-HNS(6)	EFSIDVLEEMLEKFR(13)-SEALKILNNIR(5)	7	7.94e-21	√			n.a.
145	PT1(30)-YEEX(98)	KISADQVDQEVER(1)-LKAMGEMK(2)	7	1.11e-10				n.a.
146	RS10(11)-EFTU1(264),RS10(11)-EFTU2(264)	LKAFDHR(2)-KLLDEGR(1)	7	4e-08		√		134.308
147	SYA(509)-YOEB(32)	AVDAINAGQEAVVVLDQTPFYAESGGQVGDKGELK(31)-INELIKDTR(6)	7	7.66e-08				n.a.
148	ODO2(85)-DLDH(278)	EGNSAGKETSAK(7)-VPNGKNLDAGK(5)	7	2.79e-07	√			n.a.
149	SYN(114)-GYRB(21)	VEVAGWVEDPDTYPMAAKR(18)-GLDAVRKR(7)	7	3.3e-07				n.a.
150	SYK2(1)-YGID(149)	MSEQETR(1)-KLAALR(1)	7	4.83e-07				n.a.
151	HISJ(234)-YTFR(322)	EALNKAFAEMR(5)-GKPQNLR(2)	7	1.25e-06				n.a.
152	OPPA(331)-MPPA(404)	DIIVNKVK(6)-KNLGVDVK(1)	7	1.29e-06				n.a.
153	SKP(85)-GRPE(66)	LEKDVMAQR(3)-VKAEMENLR(2)	7	3.5e-06				n.a.
154	PTA(665)-YBDN(381)	ATVFIFPDLNTGNTTYKAVQR(17)-ALSFSPTKSK(8)	7	6.31e-06				n.a.
155	PURA(367)-METH(497)	EVTTTPLAADDWKGVEPIYETMPGWSESTFGVK(13)-KIEICRR(1)	7	1.41e-05				n.a.
156	SUCC(146)-MLTF(171)	VAEETPHLIHKVALDPLTGPMPYQGR(11)-ETKFPELSWKVDDK(3)	7	1.6e-05				n.a.
157	SYM(403)-RIR3(343)	NAGFINKR(7)-KYLNAR(1)	7	1.8e-05				n.a.
158	ENO(419)-SSPA(2)	IEEALGEKAPYNGRK(8)-AVAANKR(1)	7	2.89e-05				n.a.
159	ACKA(368)-EFTU1(264),ACKA(368)-EFTU2(264)	FGKSGFINK(3)-KLLDEGR(1)	7	3.05e-05				n.a.
160	DNAJ(62)-TORC(118)	EAYEVLTDSQKR(11)-FEAKR(4)	7	0.000139				n.a.
161	YJGA(51)-YFJL(143)	LGAEIVDLGKNALDK(10)-QELIDDLNKR(9)	7	0.000213				n.a.
162	PPK(463)-HLDE(384)	YAHIGTGNFNEKTAR(12)-LKGDSR(2)	7	0.000312				n.a.
163	PPSA(86)-YGIS(533)	TDIDDVTQLAKAGAQIR(11)-ELYIKAH(5)	7	0.000425				n.a.
164	HSLU(240)-CSDA(2)	LLIEEEAAKLVNPEELKQDAIDAVEQHGIVFIDEIDK(17)-NVFNPAQFR(1)	7	0.000617				n.a.
165	DLDH(237)-ODO2(94)	FNLMLETKVTAVEAK(8)-SEEKASTPAQR(4)	6	3.61e-12	√			n.a.
166	ODP2(313)-DLDH(339)	AEAPAAAPAAKAEGK(11)-KHYFDPK(1)	6	3.84e-11	√			n.a.
167	TREC(184)-EFTU1(264),TREC(184)-EFTU2(264)	KVCEFWADR(1)-KLLDEGR(1)	6	6.36e-11				n.a.
168	HNS(83)-DCUP(2)	EMLIADGIDPNELLNSLAAVKSGTKAK(21)-TELKNDRYLR(1)	6	1.58e-10				n.a.
169	STPA(2)-RLMN(17)	SVMLQSLNNIR(1)-DGKINLLDLNR(3)	6	3.8e-07				n.a.
170	YRBA(45)-YEAD(129)	KQQTVYGPLMEYIADNR(1)-KFWPHDFTLLAHFR(1)	6	4.33e-07				n.a.
171	ODP2(317)-DLDH(339)	AEGKSEFAENDAYVHATPLIR(4)-KHYFDPK(1)	6	9.78e-07	√			n.a.
172	KPTA(14)-TORY(365)	ELADTSKFLSFVLRHK(7)-DITEKQ(5)	6	2.01e-06				n.a.
173	MLC(1)-HISP(134)	MVAENQPGHIDQIK(1)-AVKYLAKVGIDER(3)	6	6.71e-06				n.a.
174	PPDB(44)-ROB(257)	KLALEDEIWLR(1)-KGQDIER(1)	6	8.06e-06				n.a.
175	CSRA(38)-CYDD(7)	IGVNAPKEVSVHR(7)-QKELTR(2)	6	8.53e-06				n.a.
176	YCAI(701)-MACB(269)	LPSNKVKHR(7)-ALAANKMR(6)	6	9.3e-06				n.a.
177	END3(91)-EPTB(183)	AENIIKTCR(6)-LLDIQQKK(7)	6	2.06e-05				n.a.
178	ACON2(571)-HYPB(87)	KNIFSGRILEIEGLPDLK(1)-MLEVEIDVLDKNNR(11)	6	3.07e-05				n.a.
179	YHJR(62)-YGEQ(8)	WPLLAEFAQQK(11)-VIYAFNKR(7)	6	3.08e-05				n.a.
180	GFCC(119)-DCTR(1)	LPVKLDPDFVR(4)-MFLIITR(1)	6	3.61e-05				n.a.
181	SYP(547)-GARR(17)	NLDNDDIEYKYR(10)-PMSKNLLK(4)	6	7.06e-05				n.a.
182	HNS(83)-YIIR(11)	EMLIADGIDPNELLNSLAAVKSGTK(21)-TIQQWLFSFKGR(10)	6	7.79e-05				n.a.
183	HLDE(431)-AHPC(2)	LIAGILPDLLVKGGDYKPEEIAGSK(12)-SLINTK(1)	6	9.33e-05				n.a.
184	PUR8(400)-A5A625|YIBV(104)	YGIEKPYEK(5)-IKDKNK(2)	6	0.000155				n.a.
185	YHDZ(122)-YGGE(124)	KEAEDLAVHYLER(1)-QLDKLNSLLDGALK(4)	6	0.000172				n.a.
186	DBHA(22)-OGT(1)	AELSKTQAKAALESTLAAITESLK(9)-MLRLLEEK(1)	6	0.000195				n.a.
187	PROQ(75)-PINE(124)	YLYGVKPGATR(6)-TKAGLETAR(2)	6	0.000202				n.a.
188	FABI(205)-APPB(205)	DFRKMLAHCEAVTPIR(4)-SQLATKR(6)	6	0.000389				n.a.
189	ISCU(59)-TTDA(38)	FKTYGCGSAIASSSLVTEWVK(2)-LKQLK(2)	6	0.000464				n.a.
190	DEOB(372)-YGEQ(1)	EHIPVLVYGPKVK(11)-MVIYAFNKR(1)	6	0.000735				n.a.
191	RPOC(9)-RPOB(1303)	FLKAQTK(3)-TKMYK(2)	6	0.000865	√	√		27.8715
192	HNS(83)-YKGH(19)	EMLIADGIDPNELLNSLAAVKSGTK(21)-QDIDLIEILFYLKK(13)	6	0.0011				n.a.
193	EFTU1(57)-CHAC(99),EFTU2(57)-CHAC(99)	AFDQIDNAPEEKAR(12)-MLALKEGGR(5)	5	9.13e-13				n.a.
194	RPOC(749)-RPOB(639)	GLMAKPDGSIIETPITANFR(5)-SKGESSLFSR(2)	5	1.51e-12	√	√	√	13.4593
195	EFTU1(314)-PFLB(2),EFTU2(314)-PFLB(2)	FESEVYILSKDEGGR(10)-SELNEK(1)	5	6.53e-11				n.a.
196	IF1(64)-FKBA(110)	VTVELTPYDLSKGR(12)-VKSSAQAK(2)	5	3.28e-10				n.a.
197	IF3(97)-YHJE(232)	EIKFRPGTDEGDYQVK(3)-AKKQVK(2)	5	3.67e-09				n.a.
198	RPOC(96)-HNS(57)	CGVEVTQTKVR(9)-KLQQYR(1)	5	7.72e-09				n.a.
199	IF1(64)-FKBA(69)	VTVELTPYDLSKGR(12)-EQEKLGIK(4)	5	9.34e-09				n.a.
200	DAPD(254)-YLIF(432)	YSLYCAVIVKK(10)-SKKNGR(2)	5	2.36e-08				n.a.
201	RL17(121)-RL2(183)	SEKAEAAAE(3)-KVEADCR(1)	5	5.24e-08	√	√		117.03
202	ATPA(384)-CH60(226)	VGGAAQTKIMK(8)-KISNIR(1)	5	1.14e-07				n.a.
203	HNS(83)-RCSC(756)	EMLIADGIDPNELLNSLAAVKSGTK(21)-KWQGRAVVTFCR(1)	5	1.28e-07				n.a.
204	ASPA(293)-YPDJ(2)	MSKICNDLR(3)-GYDSR(1)	5	1.29e-07				n.a.
205	PT1(30)-YEEX(33)	KISADQVDQEVER(1)-EIQDVEKK(7)	5	5.27e-07				n.a.
206	PFKB(27)-RECA(2)	IYTLTLAPSLDSATITPQIYPEGKLRCTAPVFEPGGGGINVAR(24)-AIDENKQKALAAALGQIEK(1)	5	1.03e-06				n.a.
207	TYPH(165)-HICA(49)	DVGVAIIGQTSSLAPADKR(18)-KAILK(1)	5	2.02e-05				n.a.
208	HNS(87)-ARGR(1)	EMLIADGIDPNELLNSLAAVKSGTKAK(25)-MRSSAK(1)	5	2.25e-05				n.a.
209	SYP(547)-AIS(44)	NLDNDDIEYKYR(10)-IDNKTLAR(4)	5	6.49e-05				n.a.
210	YFFQ(106)-RL3(7)	INLLNKMGDLAGR(6)-IGLVGKK(6)	5	9.55e-05				n.a.
211	PUR8(94)-CSRA(1)	TTNHDVKAVEYFLK(7)-MLILTR(1)	5	0.000104				n.a.
212	FLIY(230)-G3P1(192)	QESGVALRKGNEDLLK(9)-TVDGPSHKDWR(8)	5	0.000118				n.a.
213	FABD(286)-G3P1(23)	VLTGLTKR(7)-AAQKR(4)	5	0.000161				n.a.
214	RLMN(163)-EFTU1(264),RLMN(163)-EFTU2(264)	IVGAAKVTGQR(6)-KLLDEGR(1)	5	0.000267	√			n.a.
215	GUAA(351)-EBGC(134)	WLAQGTIYPDVIESAASATGKAHVIK(21)-KVVLK(1)	5	0.000399				n.a.
216	SYP(547)-ARGE(224)	NLDNDDIEYKYRR(10)-DNLKER(4)	5	0.00041				n.a.
217	DLDH(255)-LIGT(1)	EDGIYVTMEGKK(11)-MSEPQR(1)	5	0.000445				n.a.
218	YHDZ(121)-YDGJ(112)	MPKKEAEDLAVHYLER(3)-ELDALAKSLGR(7)	5	0.000579				n.a.
219	EFTS(214)-NRDR(53)	EIAEKMVEGR(5)-VVKSNDVR(3)	5	0.000786				n.a.
220	ODP2(302)-YEHR(1)	QEAAAPAPAAKAEAPAAAPAAK(11)-MKAFNK(1)	5	0.00113				n.a.
221	MURD(421)-ALLC(266)	VQPGDMVLLSPACASLDQFKNFEQR(20)-MGDPLVLTFGKVEPR(11)	5	0.00233				n.a.
222	HSLU(232)-CSDA(2)	LLIEEEAAKLVNPEELKQDAIDAVEQHGIVFIDEIDK(9)-NVFNPAQFR(1)	5	0.00249				n.a.
223	DBHA(22)-EFTU1(264),DBHA(22)-EFTU2(264)	TQAKAALESTLAAITESLK(4)-KLLDEGR(1)	4	5.07e-13				n.a.
224	LPXD(77)-EFTU1(264),LPXD(77)-EFTU2(264)	SAALVVKNPYLTYAR(7)-KLLDEGR(1)	4	1.64e-11				n.a.
225	RAPA(875)-RPOC(13)	HTGSKLVNAVQQDVHAILQLGEAQIEK(5)-AQTKTEEFDAIK(4)	4	3.75e-10	√			n.a.
226	SYFB(728)-SYFA(324)	DIAVVVAENVPAADILSECKK(20)-FLKQFK(3)	4	1.54e-08	√			n.a.
227	TIG(287)-EFTU1(264),TIG(287)-EFTU2(264)	VKSQAIEGLVK(2)-KLLDEGR(1)	4	2.84e-08				n.a.
228	EFTU1(314)-DBHA(67),EFTU2(314)-DBHA(67)	FESEVYILSKDEGGR(10)-NPQTGKEIK(6)	4	4.21e-08				n.a.
229	DNAK(55)-TONB(1)	TTPSIIAYTQDGETLVGQPAKR(21)-MTLDLPR(1)	4	4.99e-08				n.a.
230	EFTU1(264)-SYT(241),EFTU2(264)-SYT(241)	KLLDEGR(1)-LEEAAKR(6)	4	7.02e-08				n.a.
231	RL10(105)-RL7(71)	ANAKFEVK(4)-VAVIKAVR(5)	4	1.45e-07	√	√		52.9564
232	HNS(83)-SELB(581)	EMLIADGIDPNELLNSLAAVKSGTK(21)-KLAIQILEYFDR(1)	4	1.58e-07				n.a.
233	EFTU1(57)-EFG(153),EFTU2(57)-EFG(153)	AFDQIDNAPEEKAR(12)-MGANFLKVVNQIK(7)	4	2.04e-07	√			n.a.
234	RPOC(1072)-RPOB(265)	TAGGKDLRPALK(5)-VYVEKGR(5)	4	3.77e-07	√	√		25.027
235	IPYR(116)-YBJD(284)	LSKEYDHIK(3)-LDKDAR(3)	4	6.94e-07				n.a.
236	GALF(266)-GALU(27)	KMGYMQAFVK(1)-MLPATKAIPK(6)	4	9.83e-07	√			n.a.
237	RS10(11)-FKBA(110)	LKAFDHR(2)-VKSSAQAK(2)	4	1.24e-06				n.a.
238	IHFA(86)-IHFB(1)	VVTFRPGQKLK(9)-MTKSELIER(1)	4	1.48e-06	√	√	√	18.7896
239	ODP1(508)-YEJL(2)	ALNVMLKNK(7)-PQISR(1)	4	1.96e-06				n.a.
240	CSPE(59)-EFTU1(57),CSPE(59)-EFTU2(57)	VEFEITNGAKGPSAANVIAL(10)-AFDQIDNAPEEKAR(12)	4	4.19e-06				n.a.
241	EFTU1(264)-RELB(1),EFTU2(264)-RELB(1)	KLLDEGR(1)-MGSINLR(1)	4	4.53e-06				n.a.
242	GCH1(86)-RL29(54)	MYVDEIFSGLDYANFPKITLIENKMK(17)-VKTLLNEK(2)	4	5.71e-06				n.a.
243	RLMN(17)-HNS(57)	DGKINLLDLNR(3)-KLQQYR(1)	4	8.13e-06				n.a.
244	DBHA(18)-REM(2)	AELSKTQAKAALESTLAAITESLK(5)-MNIEELRK(1)	4	8.69e-06				n.a.
245	DEOB(372)-CHIP(1)	EHIPVLVYGPKVK(11)-MRTFSGKR(1)	4	9.42e-06				n.a.
246	GPMA(113)-SGCA(13)	YGDEQVKQWR(7)-KATDWR(1)	4	1.05e-05				n.a.
247	YEJH(297)-HTRC(7)	DVLIENFKAQRFR(8)-QEVEKWR(5)	4	1.44e-05				n.a.
248	RPOB(914)-RPOC(50)	ASDVKDSSLR(5)-TFKPER(3)	4	1.94e-05	√	√	√	21.4072
249	FKBA(110)-RS10(1)	VKSSAQAK(2)-MQNQR(1)	4	2.53e-05				n.a.
250	NUOF(366)-CLPB(558),NUOF(366)-SUFE(9),NUOF(366)-YPHG(628),NUOF(366)-QUEF(214)	DGLPWSVKILR(8)-EKLLR(2)	4	2.58e-05				n.a.
251	SUCC(79)-KDSC(79)	AFAENWLGKR(9)-KAKLVEDR(1)	4	2.73e-05				n.a.
252	TPX(33)-THIO(91)	AQTFTLVAKDLSDVTLGQFAGK(9)-NGEVAATKVGALSK(8)	4	3.17e-05				n.a.
253	NUSG(155)-GSPH(1)	VNDGPFADFNGVVEEVDYEKSR(20)-MNQQR(1)	4	4.38e-05				n.a.
254	NUSA(16)-YNFG(161)	EILAVVEAVSNEKALPR(13)-QKHGTLAAVAPLPR(2)	4	4.57e-05				n.a.
255	RNG(200)-RSMH(275)	VMERKK(5)-KLGGR(1)	4	4.82e-05				n.a.
256	YCEH(203)-MUKB(154)	VEALEIEVAELKQR(12)-VLPLNELKDK(8)	4	4.91e-05				n.a.
257	DLDH(1)-IPYR(116)	MSTEIKTQVVVLGAGPAGYSAAFR(1)-LSKEYDHIKDVNDLPELLK(3)	4	4.95e-05				n.a.
258	BCP(40)-YJFJ(216)	VLVYFYPKAMTPGCTVQACGLR(8)-LAEAGIGGSNKSSAQDVLAR(11)	4	5.68e-05				n.a.
259	FKBA(110)-IF1(42)	VKSSAQAK(2)-KNYIR(1)	4	6.29e-05				n.a.
260	RPOB(1262)-DEOC(1)	STGSYSLVTQQPLGGKAQFGGQR(16)-MTDLKASSLR(1)	4	6.42e-05				n.a.
261	EXOX(122)-G3P1(124)	TRKLNVQTPPGLHHHR(3)-VVMTGPSKDNTPMFVK(8)	4	8.13e-05				n.a.
262	DCD(58)-YDAW(1)	GHTAAFIDLSGPKDEVSAALDR(13)-MSSSQELR(1)	4	8.17e-05				n.a.
263	AMIC(212)-EFTU1(264),AMIC(212)-EFTU2(264)	EKDVVLQIAR(2)-KLLDEGR(1)	4	0.000108				n.a.
264	PROQ(131)-PTA(479)	REAAATAGEKEDAPR(10)-NKGMTETVAR(2)	4	0.00013				n.a.
265	KPYK2(160)-YGHO(177)	VFTEVTVGGPLSNNKGINK(15)-TDLTFSPALKK(10)	4	0.000133				n.a.
266	MQO(531)-SYS(38)	ELQYTSEVLGLNYDKPQAADSTPKPQLK(24)-RKVLQVK(2)	4	0.000152				n.a.
267	ADHE(18)-AHPC(171)	KAQREYASFTQEQVDK(1)-WKEGEATLAPSLDLVGK(2)	4	0.00019				n.a.
268	EFTU1(57)-YOEF(1),EFTU2(57)-YOEF(1)	AFDQIDNAPEEKAR(12)-MAGVR(1)	4	0.00019				n.a.
269	ECOT(132)-ALAC(2)	YNSKLPIVVYTPDNVDVK(4)-ADTRPERR(1)	4	0.000198				n.a.
270	YEEY(1)-HRPA(771)	MKPLLDVLMILDALEKEGSFAAASAK(1)-ENLKLRAEVEELEHK(4)	4	0.000201				n.a.
271	EFTS(177)-YFJZ(1)	HIAMHVAASKPEFIKPEDVSAEVVEK(10)-MSNTTWGLQR(1)	4	0.00025				n.a.
272	PTA(665)-YCIA(98)	ATVFIFPDLNTGNTTYKAVQR(17)-KVASEPIGQR(1)	4	0.000257				n.a.
273	TYPH(190)-FIXX(49)	DITATVDSIPLITASILAKK(19)-QALELLVKACPAGLYKK(16)	4	0.000264				n.a.
274	YJCS(472)-PSS(75)	VINLAQEANKQGDYR(10)-GILNALYEAKRQR(10)	4	0.000281				n.a.
275	YBBP(581)-YCGJ(57)	ADEVSMEEGLAKRLNVALGDTVTFMGDTQEFR(12)-KYLGEK(1)	4	0.000294				n.a.
276	HNS(83)-PQIB(427)	EMLIADGIDPNELLNSLAAVKSGTKAK(21)-LMEALDKINK(7)	4	0.000313				n.a.
277	LRP(129)-BAER(122)	KLLGETLLR(1)-VKTILR(2)	4	0.000324				n.a.
278	PFLB(235)-HSLU(2)	ALGQMKEMAAK(6)-SEMTPR(1)	4	0.000386				n.a.
279	YDAU(135)-PTPD(8)	EADVQTKQER(7)-KDITR(1)	4	0.000444				n.a.
280	YHAK(132)-PQIB(427)	ENPLIQKLALNMGK(7)-LMEALDKINK(7)	4	0.000475				n.a.
281	BCSC(696)-YHBU(1)	VALAQAQLGDTAAAQRTFNKLIPQAK(20)-MELLCPAGNLPALK(1)	4	0.000497				n.a.
282	PT1(96)-TTCA(169)	DKHMTADAAAHEVIEGQASALEELDDEYLK(2)-MKGMPPKLMSDDGK(2)	4	0.000527				n.a.
283	G6PD(389)-HNS(57)	LQPDEGVDIQVLNKVPGLDHK(14)-KLQQYR(1)	4	0.000606				n.a.
284	PRP1(173)-SMTA(2)	LGERQKGQGITGADHFWFGHTPLR(6)-QDRNFDDIAEKFSR(1)	4	0.000634				n.a.
285	GYRA(1)-RS4(156)	MSDLAREITPVNIEEELK(1)-VKAALELAEQREK(2)	4	0.000793				n.a.
286	BCP(84)-DEDD(163)	LSRFAEKELLNFTLLSDEDHQVCEQFGVWGEK(7)-VNEIVGKLRGAGYR(7)	4	0.00097				n.a.
287	INTR(313)-HSLV(81)	QKLHFVFMPR(2)-AAVELAKDWR(7)	4	0.00114				n.a.
288	RPOB(1262)-RPOC(334)	STGSYSLVTQQPLGGKAQFGGQR(16)-GKQGR(2)	4	0.00403	√	√		23.1811
289	ODO2(2)-DLDH(278)	SSVDILVPDLPESVADATVATWHK(1)-VPNGKNLDAGK(5)	4	0.00518	√			n.a.
290	ACCC(324)-EFTU1(264),ACCC(324)-EFTU2(264)	IAAGQPLSIKQEEVHVR(10)-KLLDEGR(1)	3	3.28e-12				n.a.
291	ENTF(952)-YBDZ(2)	ETLPPHMVPVVLLQLPQLPLSANGKLDR(25)-AFSNPFDDPQGAFYILR(1)	3	3.35e-12				n.a.
292	ENO(357)-ALDB(379)	FNQIGSLTETLAAIKMAK(15)-KLLEGELK(1)	3	4.65e-12				n.a.
293	POTD(343)-ODP2(92)	NGEWQNDVGAASSIYEEYYQKLK(21)-KEAAPAAAPAAAAAK(1)	3	1.38e-11				n.a.
294	ODO2(218)-DLDH(256)	KQYGEAFEK(1)-KAPAEPQR(1)	3	3.32e-10	√			n.a.
295	DNAK(55)-ARCD(227)	TTPSIIAYTQDGETLVGQPAKR(21)-NKRDVGK(2)	3	5.99e-09				n.a.
296	CSPC(59)-EFTU1(264),CSPC(59)-EFTU2(264)	TLAEGQNVEFEIQDGQKGPAAVNVTAI(17)-KLLDEGR(1)	3	1.9e-08				n.a.
297	HNS(83)-MDTC(215)	EMLIADGIDPNELLNSLAAVKSGTKAK(21)-KPQGALEDGTHR(1)	3	5.11e-08				n.a.
298	SYM(403)-RLUA(94)	NAGFINKR(7)-KQYVAR(1)	3	1.49e-07				n.a.
299	CSPE(59)-DBHB(67)	VEFEITNGAKGPSAANVIAL(10)-NPQTGKEITIAAAK(6)	3	3.25e-07				n.a.
300	MFD(238)-FIC(2)	DTFEVKR(6)-SDKFGEGR(1)	3	4.13e-07				n.a.
301	PFLB(616)-TDCE(166)	DAIPTQSVLTITSNVVYGKKTGNTPDGR(20)-KSGVLTGLPDGYGR(1)	3	7.39e-07				n.a.
302	ATPF(134)-ACRA(175)	QVAILAVAGAEKIIER(12)-INLAYTKVTSPISGR(7)	3	1.22e-06				n.a.
303	HNS(83)-HOFM(45)	EMLIADGIDPNELLNSLAAVKSGTK(21)-LPLENDIIKDGR(9)	3	1.28e-06				n.a.
304	HNS(83)-YTFP(1)	EMLIADGIDPNELLNSLAAVKSGTK(21)-MRIFVYGSLRHK(1)	3	1.84e-06				n.a.
305	SUHB(251)-TOP3(89)	VVKAMLANMR(3)-QLNVIKR(6)	3	4e-06				n.a.
306	DPS(105)-RECA(20)	TPLKSYPLDIHNVQDHLK(4)-ALAAALGQIEKQFGKGSIMR(11)	3	4.62e-06				n.a.
307	EFG(507)-EFTU1(264),EFG(507)-EFTU2(264)	HAKQSGGR(3)-KLLDEGR(1)	3	6.63e-06	√			n.a.
308	CH60(277)-ATPA(388)	VAAVKAPGFGDR(5)-KLSGGIR(1)	3	9.09e-06				n.a.
309	YIDA(177)-YJHP(1)	IPQEVKEKYTVLK(8)-MDIPR(1)	3	1e-05				n.a.
310	PFLB(615)-TDCE(166)	DAIPTQSVLTITSNVVYGKKTGNTPDGR(19)-KSGVLTGLPDGYGR(1)	3	1.4e-05				n.a.
311	YJJI(475)-MFD(238)	LSDLEKYR(6)-DTFEVKR(6)	3	1.71e-05				n.a.
312	OSMY(145)-EFTU1(264),OSMY(145)-EFTU2(264)	AKLLADDIVPSR(2)-KLLDEGR(1)	3	1.72e-05				n.a.
313	EFTU1(264)-IF1(42),EFTU2(264)-IF1(42)	KLLDEGR(1)-KNYIR(1)	3	2.56e-05				n.a.
314	GLYA(346)-ODO2(218)	ANITVNKNSVPNDPK(7)-KQYGEAFEK(1)	3	2.78e-05				n.a.
315	CIRA(62)-EFG(425)	KPVQNLK(1)-TKADQEK(2)	3	3.06e-05				n.a.
316	RIR1(760)-EFTU1(264),RIR1(760)-EFTU2(264)	DGAEDAQDDLVPSIQDDGCESGACKI(25)-KLLDEGR(1)	3	3.18e-05				n.a.
317	YFAT(68)-EFTU1(264),YFAT(68)-EFTU2(264)	FAANETLKVHDSK(8)-KLLDEGR(1)	3	3.34e-05				n.a.
318	UVRD(389)-AHR(336)	QEIKDALSYLR(4)-VVLKADF(4)	3	3.43e-05				n.a.
319	HDEA(32)-YEBC(14)	KPVNSWTCEDFLAVDESFQPTAVGFAEALNNK(1)-KAAQDAKR(1)	3	3.79e-05				n.a.
320	YGHR(237)-ARND(1)	APYSEVLEQAQKAVSLVAIVSDR(12)-MTKVGLRIDVDTFR(1)	3	4.5e-05				n.a.
321	HNS(57)-STPA(38)	KLQQYR(1)-VVTKER(4)	3	4.93e-05	√			n.a.
322	SYH(53)-SGCC(280)	LPIVEQTPLFKR(11)-FFQKYFK(4)	3	4.93e-05				n.a.
323	RL7(71)-RL10(2)	VAVIKAVR(5)-ALNLQDK(1)	3	5.11e-05	√	√		72.6034
324	YGEP(90)-YJCF(79)	EADAALLNVIYPTNLSKINTR(17)-IYDSLPSGKITK(9)	3	5.66e-05				n.a.
325	ACCA(2)-DNAK(304)	SLNFLDFEQPIAELEAK(1)-AKLESLVEDLVNR(2)	3	5.73e-05				n.a.
326	NARH(216)-AHPF(399),NARY(215)-AHPF(399)	REEDGIVLIDQDKCR(13)-ADQVLQDKLRSLK(8)	3	5.88e-05				n.a.
327	EUTD(1)-RS21(5)	MIIERCR(1)-MPVIKVR(5)	3	6.1e-05				n.a.
328	YBDZ(2)-ENTF(861)	AFSNPFDDPQGAFYILR(1)-SDDQLKIR(6)	3	6.16e-05				n.a.
329	YIHI(19)-EFTU1(264),YIHI(19)-EFTU2(264)	KTREELDQEAR(1)-KLLDEGR(1)	3	6.63e-05				n.a.
330	RL3(7)-YHBY(2)	IGLVGKK(6)-NLSTK(1)	3	7.12e-05	√			n.a.
331	AHPF(263)-YEAH(27)	FGGQILDTVDIENYISVPKTEGQK(19)-RYKAQIK(3)	3	7.74e-05				n.a.
332	GLTB(599)-YDFW(49)	ELCDKAEK(5)-SYLKR(4)	3	7.79e-05				n.a.
333	RSGA(28)-YIDA(98)	EKPDYDDNLFGEPDEGIVISR(2)-FLEKLSR(4)	3	7.98e-05				n.a.
334	ROF(35)-RPOC(599),ROF(35)-EMTA(163)	DGEKLQAK(4)-KAISK(1)	3	8.19e-05				n.a.
335	YGGE(83)-DPIB(2)	VAQYISFLELNQIAKK(15)-LQLNENK(1)	3	8.27e-05				n.a.
336	HEM2(292)-YFCI(242)	FAALAGAIDEEKVVLESLGSIK(12)-EKLMTIADR(2)	3	9.06e-05				n.a.
337	YGAV(2)-INSL1(237),YGAV(2)-INSL2(237),YGAV(2)-INSL3(237)	TELAQLQASAEQAAALLK(1)-KAGAPFPAR(1)	3	9.71e-05				n.a.
338	FHLA(527)-ADH2(332)	KMVADR(1)-ELAKK(4)	3	9.74e-05				n.a.
339	YHDZ(121)-MUG(1)	MPKKEAEDLAVHYLER(3)-MVEDILAPGLR(1)	3	0.00012				n.a.
340	HLDE(431)-UBIB(51)	LIAGILPDLLVKGGDYKPEEIAGSK(12)-DKLLGER(2)	3	0.000125				n.a.
341	EFTS(177)-REM(2)	HIAMHVAASKPEFIKPEDVSAEVVEK(10)-MNIEELR(1)	3	0.000126				n.a.
342	CIRA(68)-DIND(218)	PVQNLKDVLK(6)-LKRDGVNSK(2)	3	0.000131				n.a.
343	SYR(430)-RCNR(26)	LANAVGIGAVKYADLSK(11)-IQGQVVALKK(9)	3	0.000134				n.a.
344	CSDE(145)-G3P1(124)	SQGLNALSEAIIAATKQV(16)-VVMTGPSKDNTPMFVK(8)	3	0.000146				n.a.
345	YCCJ(2)-ODO2(298)	PTQEAKAHHVGEWASLR(1)-KIKELAVK(1)	3	0.000147				n.a.
346	INTZ(160)-ADHE(441)	KERTAPEQAR(1)-HLINKK(5)	3	0.000149				n.a.
347	CPXR(2)-YBCK(93)	NKILLVDDDR(1)-EKVGEAIER(2)	3	0.000162				n.a.
348	SRLD(222)-GCSP(835)	PDQVEQYYIDKVPLKR(15)-EETGISELDIAKR(12)	3	0.000167				n.a.
349	ZAPA(2)-DCUD(292)	SAQPVDIQIFGR(1)-KHNLR(1)	3	0.000168				n.a.
350	RS2(28)-PFLB(386)	MKPFIFGAR(2)-KFAAK(1)	3	0.00017				n.a.
351	MIND(163)-CADC(189)	ILGILASKSR(8)-LPMSKSR(5)	3	0.000178				n.a.
352	FDHE(31)-WBBI(17)	LKNLYNR(2)-DAGFKAR(5)	3	0.000192				n.a.
353	GLYA(250)-RS8(2)	GGSEELYKKLNSAVFPGGQGGPLMHVIAGK(8)-SMQDPIADMLTR(1)	3	0.000193				n.a.
354	ARTQ(128)-SYA(842)	GALKAVPVGQWESGQALGLSK(4)-AGELIGMVAQQVGGKGGGR(15)	3	0.000197				n.a.
355	YDEP(239)-YFDK(81)	GAKMIAINPLQERGLER(3)-KQQLINQANDYMNSK(1)	3	0.000222				n.a.
356	FUMB(99)-YBHP(119)	NSEIAAKGVLPTCQDTGTAIIVGK(7)-DVSVDGAEKR(9)	3	0.000282				n.a.
357	OPPD(100)-YFHM(868)	EILNLPEHELNKLR(12)-LDLALETPAKMR(10)	3	0.0003				n.a.
358	DBHA(67)-FLGJ(228)	NPQTGKEIK(6)-KVKAK(1)	3	0.000307				n.a.
359	YQCC(2)-NARG(459)	TTHDR(1)-LPVKR(4)	3	0.000334				n.a.
360	KPYK2(60)-SODM(206)	EIAAKLGR(5)-FAAKK(5)	3	0.000348				n.a.
361	CNU(9)-YBIR(2),CNU(9)-YGFK(662)	TVQDYLLKFR(8)-SLPFLR(1)	3	0.000373				n.a.
362	RL7(85)-BFD(13)	GATGLGLKEAKDLVESAPAALK(11)-KIRQAVR(1)	3	0.000438				n.a.
363	LPTD(490)-EFTU1(264),LPTD(490)-EFTU2(264)	VDGKMVFER(4)-KLLDEGR(1)	3	0.000525				n.a.
364	BCP(40)-TYPH(165)	VLVYFYPKAMTPGCTVQACGLR(8)-DVGVAIIGQTSSLAPADKR(18)	3	0.000566				n.a.
365	FDHE(89)-FDOG(1)	EASAQGKPPLDIHVLPR(7)-MQVSR(1)	3	0.000618	√			n.a.
366	FABI(205)-YJHR(202)	DFRKMLAHCEAVTPIR(4)-TLAGAQKK(7)	3	0.000623				n.a.
367	DPS(101)-MDTM(339)	AVQLGGVALGTTQVINSKTPLK(18)-FTLFSNKLPK(7)	3	0.000626				n.a.
368	IF2(849)-SSNA(218)	RFKDDVNEVR(3)-EAVKATGR(4)	3	0.000673				n.a.
369	FABD(218)-CPTB(1)	LAVELAKITFNAPTVPVVNNVDVK(7)-MDINNK(1)	3	0.000677				n.a.
370	YCGF(293)-FEPA(298)	FDEFAEAIKSLK(9)-SKYGDETNR(2)	3	0.000716				n.a.
371	EFTU1(264)-TKT2(298),EFTU2(264)-TKT2(298)	KLLDEGR(1)-EKGEK(2)	3	0.000741				n.a.
372	CYSD(241)-YPHF(1)	IDLQPGEVIKKR(11)-MPTKMR(1)	3	0.000774				n.a.
373	SODF(44)-SGCB(2)	HHQTYVTNLNNLIKGTAFEGK(14)-KKILVACGTGMSTSTMIAHK(1)	3	0.00078				n.a.
374	PSUK(207)-INSH5(2)	EDVAKVAAWFHQHGLNR(5)-SHQLTFADSEFSTKR(1)	3	0.00087				n.a.
375	HNS(87)-PQIB(427)	EMLIADGIDPNELLNSLAAVKSGTKAK(25)-LMEALDKINK(7)	3	0.000921				n.a.
376	EFTS(207)-PFLD(603)	EYQVQLDIAMQSGKPK(14)-EVEKYQNPR(4)	3	0.000986				n.a.
377	HNS(83)-YEDQ(513)	EMLIADGIDPNELLNSLAAVKSGTK(21)-EMLIAKSTTIR(6)	3	0.00111				n.a.
378	PFLB(195)-YBAA(16)	VALYGIDYLMKDK(11)-KDAYREMAAK(1)	3	0.00122				n.a.
379	FABI(205)-YHBY(92)	DFRKMLAHCEAVTPIR(4)-KISLPR(1)	3	0.00143				n.a.
380	SUCC(146)-YDJF(11)	VAEETPHLIHKVALDPLTGPMPYQGR(11)-IQAIKQMVANDK(5)	3	0.00147				n.a.
381	MENB(1)-YAHA(359)	MIYPDEAMLYAPVEWHDCSEGFEDIR(1)-FISEWVMKAGG(8)	3	0.00152				n.a.
382	SYT(330)-SUCD(111)	EYCIKPMNCPGHVQIFNQGLK(5)-VKLDEAGVR(2)	3	0.00153				n.a.
383	IHFA(66)-SFSA(2)	NPKTGEDIPITAR(3)-EFSPPLQR(1)	3	0.00171				n.a.
384	PABC(35)-YJHC(283)	VIDGKVSLLSAHIQRLQDACQR(5)-KGNMTSEMDGAIAYGHPGK(1)	3	0.00183				n.a.
385	SYY(85)-DAPD(1)	FQQAGHKPVALVGGATGLIGDPSFKAAER(25)-MQQLQNIIETAFER(1)	3	0.00343				n.a.
Intra-molecular Cross-links
386	EFTS(207)-EFTS(214)	EYQVQLDIAMQSGKPK(14)-EIAEKMVEGR(5)	1384	6.86e-13		√	√	10.2386
387	G3P1(213)-G3P1(124)	GASQNIIPSSTGAAKAVGK(15)-VVMTGPSKDNTPMFVK(8), GASQNIIPSSTGAAKAVGK(15)-KVVMTGPSKDNTPMFVK(9)	1287	9.37e-19		√	√	13.4304
388	SODF(44)-SODF(2)	HHQTYVTNLNNLIKGTAFEGK(14)-SFELPALPYAK(1)	903	1.06e-26		√	√	7.17035
389	PTA(665)-PTA(639)	ATVFIFPDLNTGNTTYKAVQR(17)-SKAPNSPVAGR(2)	718	1.64e-17				n.a.
390	FABI(205)-FABI(201)	KMLAHCEAVTPIR(1)-TLAASGIKDFR(8), KMLAHCEAVTPIRR(1)-TLAASGIKDFR(8)	673	1.48e-19		√	√	5.77076
391	G3P1(124)-G3P1(192)	VVMTGPSKDNTPMFVK(8)-TVDGPSHKDWR(8), KVVMTGPSKDNTPMFVK(9)-TVDGPSHKDWR(8)	597	8.53e-14		√	√	15.1619
392	IF2(808)-IF2(849)	SPKFGAIAGCMVTEGVVK(3)-FKDDVNEVR(2), SPKFGAIAGCMVTEGVVK(3)-RFKDDVNEVR(3)	591	1.62e-18		√	√	20.2377
393	DPS(101)-DPS(10)	AVQLGGVALGTTQVINSKTPLK(18)-SKATNLLYTR(2)	484	2.09e-24		√		23.5747
394	HNS(83)-HNS(57)	EMLIADGIDPNELLNSLAAVKSGTK(21)-KLQQYR(1)	419	7.82e-15				n.a.
395	CDD(173)-CDD(208)	DLEIKTLLMDEQDHGYALTGDALSQAAIAAANR(5)-SHMPYSKSPSGVALECK(7)	410	5.93e-25		√	√	13.765
396	G3P1(213)-G3P1(192)	GASQNIIPSSTGAAKAVGK(15)-TVDGPSHKDWR(8)	396	1.22e-09		√	√	19.8023
397	DBHA(22)-DBHA(1)	TQAKAALESTLAAITESLK(4)-MNKTQLIDVIAEK(1), TQAKAALESTLAAITESLKEGDAVQLVGFGTFK(4)-MNKTQLIDVIAEK(1)	394	1.78e-27		√	√	14.6307
398	SYV(909)-SYV(926)	IENKLANEGFVAR(4)-APEAVIAKER(8)	375	2.71e-17				n.a.
399	GPMA(100)-GPMA(113)	HYGALQGLNKAETAEK(10)-YGDEQVKQWR(7)	351	1.77e-12		√	√	9.85757
400	IMDH(428)-IMDH(207)	LKEIIHQQMGGLR(2)-KPNACKDEQGR(1), LKEIIHQQMGGLR(2)-KPNACK(1)	336	3.98e-38				n.a.
401	ACCC(159)-ACCC(116)	IGYPVIIKASGGGGGR(8)-LMGDKVSAIAAMK(5)	333	7.41e-15		√	√	8.64012
402	ACP(10)-ACP(2)	KIIGEQLGVK(1)-STIEER(1)	330	1.94e-11		√	√	9.64317
403	PFLB(117)-PFLB(162)	ALIPFGGIKMIEGSCK(9)-KSGVLTGLPDAYGR(1)	328	4.85e-20		√	√	17.399
404	HNS(96)-HNS(57)	AQRPAKYSYVDENGETK(6)-KLQQYR(1), PAKYSYVDENGETK(3)-KLQQYR(1)	327	3.61e-14				n.a.
405	HNS(96)-HNS(136)	AQRPAKYSYVDENGETK(6)-SLDDFLIKQ(8), PAKYSYVDENGETK(3)-SLDDFLIKQ(8)	320	1.39e-24		√	√	8.90872
406	PGK(30)-PGK(84)	ADLNVPVKDGKVTSDAR(11)-DKLSNPVR(2), DGKVTSDAR(3)-DKLSNPVR(2)	286	4.03e-13		√	√	14.0251
407	NUSA(16)-NUSA(111)	EILAVVEAVSNEKALPR(13)-ITTQTAKQVIVQK(7)	283	7.6e-19		√	√	11.7641
408	EFG(389)-EFG(440)	AGDIAAAIGLKDVTTGDTLCDPDAPIILER(11)-LAKEDPSFR(3)	258	2.57e-12		√	√	8.61492
409	SUCC(215)-SUCC(1)	QGDLICLDGKLGADGNALFR(10)-MNLHEYQAK(1)	255	4.62e-16		√	√	10.7335
410	CSRA(38)-CSRA(1)	IGVNAPKEVSVHR(7)-MLILTR(1)	255	1.5e-13		√	√	10.827
411	EFG(532)-EFG(562)	GQYGHVVIDMYPLEPGSNPKGYEFINDIK(20)-GIQEQLKAGPLAGYPVVDMGIR(7)	254	3.47e-33		√	√	11.2542
412	RPOB(844)-RPOB(914)	DTKLGPEEITADIPNVGEAALSK(3)-ASDVKDSSLR(5)	250	2.32e-10		√	√	13.9149
413	SYQ(73)-SYQ(195)	FDDTNPVKEDIEYVESIK(8)-IKFAEHHQTGNK(2), FDDTNPVKEDIEYVESIKNDVEWLGFHWSGNVR(8)-IKFAEHHQTGNK(2)	237	4.27e-23		√	√	11.3729
414	IPYR(116)-IPYR(147)	LSKEYDHIKDVNDLPELLK(3)-AQIAHFFEHYKDLEKGK(15), LSKEYDHIK(3)-DLEKGK(4), LSKEYDHIK(3)-AQIAHFFEHYKDLEKGK(15)	232	5.15e-29		√	√	10.1141
415	EFG(602)-EFG(507)	LAASIAFKEGFK(8)-HAKQSGGR(3), LAASIAFKEGFKK(8)-HAKQSGGR(3)	225	8.88e-16		√	√	16.4035
416	GLYA(331)-GLYA(346)	VVSGGTDNHLFLVDLVDKNLTGKEADAALGR(23)-ANITVNKNSVPNDPK(7), NLTGKEADAALGR(5)-ANITVNKNSVPNDPK(7)	223	5.36e-19		√	√	5.44837
417	ALF(72)-ALF(327)	APVIVQFSNGGASFIAGKGVK(18)-KYYDPR(1)	219	6.54e-13		√	√	16.9182
418	DNAK(55)-DNAK(263)	TTPSIIAYTQDGETLVGQPAKR(21)-LKEAAEK(2)	215	2.39e-08		√	√	12.3296
419	KAD(50)-KAD(40)	QAKDIMDAGK(3)-AAVKSGSELGK(4)	211	3.15e-11		√	√	8.37409
420	RAIA(29)-RAIA(2)	LEKWQTHLINPHIILSK(3)-TMNITSK(1)	208	2.66e-12		√	√	13.7436
421	CH60(80)-CH60(42)	EVASKANDAAGDGTTTATVLAQAIITEGLK(5)-NVVLDKSFGAPTITK(6)	192	1.3e-28		√	√	15.1833
422	HLDE(431)-HLDE(384)	LIAGILPDLLVKGGDYKPEEIAGSK(12)-LKGDSRPVNPLEQR(2), LIAGILPDLLVKGGDYKPEEIAGSK(12)-LKGDSR(2)	183	1.11e-16				n.a.
423	IDH(166)-IDH(235)	ENSEDIYAGIEWKADSADAEK(13)-GNIMKFTEGAFK(5)	180	9.61e-18		√	√	8.14855
424	ATPA(118)-ATPA(1)	VVNTLGAPIDGKGPLDHDGFSAVEAIAPGVIER(12)-MQLNSTEISELIK(1)	177	1.82e-30				n.a.
425	DKGA(194)-DKGA(231)	IQTESWSPLAQGGKGVFDQK(14)-WHLDSGLVVIPKSVTPSR(12)	173	1.27e-18		√	√	15.2523
426	GLYA(331)-GLYA(62)	NLTGKEADAALGR(5)-YAEGYPGKR(8), VVSGGTDNHLFLVDLVDKNLTGKEADAALGR(23)-YAEGYPGKR(8)	173	8.19e-18		√	√	11.3314
427	GPMA(239)-GPMA(100)	YYLGNADEIAAKAAAVANQGK(12)-HYGALQGLNKAETAEK(10)	172	5.18e-24		√	√	18.5379
428	EFTS(167)-EFTS(182)	GADEELVKHIAMHVAASK(8)-PEFIKPEDVSAEVVEK(5), IGVLVAAKGADEELVKHIAMHVAASK(16)-PEFIKPEDVSAEVVEK(5)	172	1.75e-05		√	√	18.4703
429	EFTU1(314)-EFTU1(57),EFTU2(314)-EFTU2(57)	FESEVYILSKDEGGR(10)-AFDQIDNAPEEKAR(12)	171	2.73e-29		√	√	14.2399
430	TYPH(190)-TYPH(165)	DITATVDSIPLITASILAKK(19)-DVGVAIIGQTSSLAPADKR(18)	171	2.45e-23		√	√	9.81819
431	PGK(82)-PGK(30)	VMVTSHLGRPTEGEYNEEFSLLPVVNYLKDK(29)-ADLNVPVKDGKVTSDAR(11), VMVTSHLGRPTEGEYNEEFSLLPVVNYLKDK(29)-DGKVTSDAR(3), PTEGEYNEEFSLLPVVNYLKDK(20)-DGKVTSDAR(3), PTEGEYNEEFSLLPVVNYLKDK(20)-ADLNVPVKDGKVTSDAR(11)	171	4.44e-11		√	√	12.5707
432	SODM(187)-SODM(119)	RPDYIKEFWNVVNWDEAAAR(6)-AEFEKAAASR(5)	170	2.36e-07		√	√	11.0441
433	EFTU1(5)-EFTU1(264),EFTU2(5)-EFTU2(264)	EKFER(2)-KLLDEGR(1), SKEKFER(4)-KLLDEGR(1)	167	7.37e-08		√	√	4.32122
434	SYL(675)-SYL(738)	VWKLVYEHTAK(3)-LAKAPTDGEQDR(3), RVWKLVYEHTAK(4)-LAKAPTDGEQDR(3)	165	2.54e-24		√	√	12.7401
435	YEJL(73)-YEJL(2)	ALQSSINEDKAH(10)-PQISR(1)	163	1.38e-11		√	√	19.1314
436	PTA(174)-PTA(115)	NTNITGVIVNKLNAPVDEQGR(11)-KHQFAQSLNYEIAK(1)	160	2.03e-27				n.a.
437	KPYK1(286)-KPYK1(13)	VVITATQMLDSMIKNPRPTR(14)-IVCTIGPKTESEEMLAK(8), VVITATQMLDSMIKNPR(14)-IVCTIGPKTESEEMLAK(8), KVVITATQMLDSMIKNPR(15)-IVCTIGPKTESEEMLAK(8)	159	2.08e-15		√	√	13.117
438	6PGD(75)-6PGD(38)	ILLMVKAGAGTDAAIDSLKPYLDK(6)-EKTEEVIAENPGK(2), ILLMVKAGAGTDAAIDSLKPYLDK(6)-EKTEEVIAENPGKK(2), ILLMVKAGAGTDAAIDSLKPYLDK(6)-SREKTEEVIAENPGK(4)	156	4.59e-24		√	√	14.3666
439	KPYK1(317)-KPYK1(13)	AEAGDVANAILDGTDAVMLSGESAKGK(25)-IVCTIGPKTESEEMLAK(8), AEAGDVANAILDGTDAVMLSGESAKGKYPLEAVSIMATICER(25)-IVCTIGPKTESEEMLAK(8)	153	9.32e-20		√	√	5.68791
440	GLYA(346)-GLYA(62)	ANITVNKNSVPNDPK(7)-YAEGYPGKR(8)	151	7.44e-12		√	√	12.3677
441	EFTU1(57)-EFTU1(264),EFTU2(57)-EFTU2(264)	AFDQIDNAPEEKAR(12)-KLLDEGR(1)	148	1.19e-21		√	√	16.7172
442	RPOB(191)-RPOB(203)	GSWLDFEFDPKDNLFVR(11)-KLPATIILR(1)	147	3.53e-21		√	√	13.5793
443	CSPE(15)-CSPE(59)	WFNESKGFGFITPEDGSK(6)-TLAEGQRVEFEITNGAKGPSAANVIAL(17), WFNESKGFGFITPEDGSK(6)-VEFEITNGAKGPSAANVIAL(10)	147	5.53e-17				n.a.
444	DEOB(259)-DEOB(274)	HGQVVSVGKIADIYANCGITK(9)-VKATGLDALFDATIK(2)	146	2.47e-29				n.a.
445	GPMA(100)-GPMA(248)	HYGALQGLNKAETAEK(10)-AAAVANQGKAK(9)	143	7.43e-15		√	√	11.8658
446	PTA(174)-PTA(255)	NTNITGVIVNKLNAPVDEQGR(11)-VKSVTFCAR(2), NTNITGVIVNKLNAPVDEQGR(11)-RVKSVTFCAR(3)	142	1.34e-13				n.a.
447	GLYA(62)-GLYA(250)	YAEGYPGKR(8)-GGSEELYKK(8)	141	1.31e-16		√	√	12.9955
448	RPOB(1262)-RPOB(1242)	STGSYSLVTQQPLGGKAQFGGQR(16)-LNHLVDDKMHAR(8)	137	1.98e-16		√	√	8.18021
449	SYY(85)-SYY(238)	FQQAGHKPVALVGGATGLIGDPSFKAAER(25)-FGKTEGGAVWLDPK(3)	136	1.82e-21		√	√	15.9622
450	DKSA(139)-DKSA(1)	PTADLCIDCKTLAEIR(10)-MQEGQNR(1)	135	1.41e-09				n.a.
451	TYPA(396)-TYPA(386)	KQEPYENVTLDVEEQHQGSVMQALGER(1)-PKVIFR(2)	134	3.2e-10				n.a.
452	DNAK(304)-DNAK(246)	AKLESLVEDLVNR(2)-KDQGIDLR(1)	133	1.43e-16		√	√	16.2249
453	ISCU(103)-ISCU(2)	NTDIAEELELPPVKIHCSILAEDAIK(14)-AYSEK(1)	132	7.78e-10		√	√	19.5268
454	SYK1(82)-SYK1(132)	IMGKASFVTLQDVGGR(4)-TKTGELSIHCTELR(2)	130	2.37e-27		√	√	17.9309
455	LON(784)-LON(651)	IEEVLTLALQNEPSGMQVVTAK(22)-AEKLGINPDFYEK(3), RIEEVLTLALQNEPSGMQVVTAK(23)-AEKLGINPDFYEK(3)	127	6.55e-20		√		26.7077
456	HLDE(106)-HLDE(179)	CDFVSVPTHPTITKLR(14)-AGVPVLIDPKGTDFER(10), CDFVSVPTHPTITKLR(14)-KAGVPVLIDPKGTDFER(11)	127	5.51e-18				n.a.
457	TIG(390)-TIG(83)	GLIEEMASAYEDPKEVIEFYSKNK(22)-EKINPAGAPTYVPGEYK(2), EVIEFYSKNK(8)-EKINPAGAPTYVPGEYK(2)	125	2.45e-23		√		33.8985
458	ODP2(456)-ODP2(442)	KLDVKITPVVFIMK(5)-KQQNEEAAK(1), LDVKITPVVFIMK(4)-KQQNEEAAK(1)	124	5.87e-17				n.a.
459	FABI(17)-FABI(43)	ILVTGVASKLSIAYGIAQAMHR(9)-EGAELAFTYQNDKLK(13)	124	5.88e-16		√	√	14.7565
460	IMDH(411)-IMDH(396)	YFQSDNAADKLVPEGIEGR(10)-GMGSLGAMSKGSSDR(10)	124	1.74e-13				n.a.
461	EFTU1(314)-EFTU1(264),EFTU2(314)-EFTU2(264)	FESEVYILSKDEGGR(10)-KLLDEGR(1)	123	2.35e-16		√		23.0676
462	TPIS(103)-TPIS(111)	TYHKESDELIAK(4)-ESDELIAKK(8)	123	3.1e-15		√	√	14.4665
463	RIMP(143)-RIMP(112)	DEVFALSNIQKANLVPHF(11)-KWQGVIK(1), AVDGEMITVTVEGKDEVFALSNIQKANLVPHF(25)-KWQGVIK(1)	123	6.45e-12				n.a.
464	RPOB(844)-RPOB(890)	DTKLGPEEITADIPNVGEAALSK(3)-VTPKGETQLTPEEK(4)	122	8.36e-21		√	√	8.81713
465	RPOB(890)-RPOB(914)	VTPKGETQLTPEEK(4)-ASDVKDSSLR(5)	122	1.23e-11		√	√	5.13771
466	CISY(356)-CISY(295)	ELGTKDDLLEVAMELENIALNDPYFIEKK(28)-DKNDSFR(2), DDLLEVAMELENIALNDPYFIEKK(23)-DKNDSFR(2), DDLLEVAMELENIALNDPYFIEKK(23)-AKDKNDSFR(4)	122	1.38e-10		√	√	11.5117
467	PTA(198)-PTA(255)	TRPDLSEIFDDSSKAK(14)-VKSVTFCAR(2)	119	4.03e-21				n.a.
468	DKSA(8)-DKSA(1)	KTSSLSILAIAGVEPYQEKPGEEYMNEAQLAHFR(1)-MQEGQNR(1)	119	4.4e-11				n.a.
469	UPP(116)-UPP(70)	NEETLEPVPYFQKLVSNIDER(13)-KITVVPILR(1)	117	1.13e-25		√	√	16.2726
470	PTA(174)-PTA(198)	NTNITGVIVNKLNAPVDEQGR(11)-TRPDLSEIFDDSSKAK(14)	117	6.31e-23				n.a.
471	GREA(22)-GREA(63)	LREELDFLKSVR(9)-IKDIEAK(2), EELDFLKSVR(7)-IKDIEAK(2)	117	3.47e-12		√	√	10.4957
472	SYQ(73)-SYQ(271)	FDDTNPVKEDIEYVESIK(8)-LNLEYTVMSKR(10), FDDTNPVKEDIEYVESIKNDVEWLGFHWSGNVR(8)-LNLEYTVMSKR(10)	116	2.07e-22		√	√	10.9884
473	FOLD(9)-FOLD(56)	IIDGKTIAQQVR(5)-KACEEVGFVSR(1)	116	2.15e-19		√	√	15.4759
474	HNS(107)-HNS(57)	YSYVDENGETKTWTGQGR(11)-KLQQYR(1)	116	1.26e-13				n.a.
475	ACON2(835)-ACON2(722)	LPTPEEYQTYVAQVDKTAVDTYR(16)-AAGKLLDAHK(4)	115	4.04e-16		√	√	10.9254
476	EFG(440)-EFG(134)	LAKEDPSFR(3)-YKVPR(2)	115	4.82e-06		√		25.7838
477	PFLB(454)-PFLB(616)	TMLYAINGGVDEKLK(13)-KTGNTPDGR(1)	114	3.96e-19		√	√	7.41246
478	TPX(2)-TPX(33)	SQTVHFQGNPVTVANSIPQAGSK(1)-AQTFTLVAKDLSDVTLGQFAGK(9)	113	3.27e-27		√		27.2432
479	MURA(88)-MURA(48)	DVNVFCAPYDLVKTMR(13)-LKDVDTSMK(2)	113	2.11e-13		√	√	12.7031
480	EFTU1(253)-EFTU1(300),EFTU2(253)-EFTU2(300)	ETQKSTCTGVEMFR(4)-PGTIKPHTK(5), ETQKSTCTGVEMFR(4)-GQVLAKPGTIKPHTK(11)	113	2.32e-11		√	√	12.4465
481	RNB(107)-RNB(52)	LAIVPDHPLLKDAIPCR(11)-SYFIPPPQMKK(10)	113	5.22e-09		√	√	12.8046
482	GPMA(33)-GPMA(18)	FTGWYDVDLSEKGVSEAK(12)-HGESQWNKENR(8)	112	1.61e-16		√	√	10.1212
483	RIR1(9)-RIR1(21)	MNQNLLVTKR(9)-INLDKIHR(5), NQNLLVTKR(8)-INLDKIHR(5)	111	2.28e-23		√	√	11.3598
484	PURA(367)-PURA(125)	EVTTTPLAADDWKGVEPIYETMPGWSESTFGVK(13)-GAKAIGTTGR(3)	111	1.84e-08		√	√	13.4554
485	EFG(159)-EFG(425)	VVNQIKTR(6)-TKADQEK(2)	110	5.11e-11		√		54.4763
486	AHPC(153)-AHPC(171)	IKAAQYVASHPGEVCPAK(2)-WKEGEATLAPSLDLVGK(2)	109	8.11e-39				n.a.
487	KPYK2(102)-KPYK2(75)	FLLDANLGKGEGDKEK(9)-HVAILGDLQGPKIR(12)	109	3.69e-18				n.a.
488	HNS(57)-HNS(120)	KLQQYR(1)-TPAVIKK(6)	109	8.88e-13				n.a.
489	EFG(532)-EFG(555)	GQYGHVVIDMYPLEPGSNPKGYEFINDIK(20)-GGVIPGEYIPAVDKGIQEQLK(14)	109	6.67e-11		√	√	13.4017
490	CH10(34)-CH10(15)	SAGGIVLTGSAAAKSTR(14)-RKEVETK(2), SAGGIVLTGSAAAKSTR(14)-KEVETK(1)	108	2.06e-12		√	√	8.72032
491	PGM(273)-PGM(2)	FMHLDKDGAIR(6)-AIHNR(1)	106	1.3e-10				n.a.
492	CH60(80)-CH60(327)	EVASKANDAAGDGTTTATVLAQAIITEGLK(5)-VVINKDTTTIIDGVGEEAAIQGR(5)	105	4.5e-34		√	√	8.8702
493	PFLB(162)-PFLB(616)	KSGVLTGLPDAYGR(1)-KTGNTPDGR(1)	105	5.5e-17		√	√	9.34108
494	PTA(255)-PTA(200)	VKSVTFCAR(2)-AKVNNVDPAK(2)	104	2.37e-14				n.a.
495	RNC(152)-RNC(210)	LDEISPGDKQKDPK(9)-KAEQAAAEQALK(1), LDEISPGDKQK(9)-KAEQAAAEQALK(1)	104	5.99e-14				n.a.
496	SODM(114)-SODM(100)	DFGSVDNFKAEFEK(9)-GTTLQGDLKAAIER(9), DFGSVDNFKAEFEK(9)-KGTTLQGDLKAAIER(10)	104	6.37e-14		√	√	11.6758
497	EFG(153)-EFG(425)	MGANFLKVVNQIK(7)-TKADQEK(2)	104	1.69e-07		√		56.3093
498	FKBA(179)-FKBA(69)	GTLIDGKEFDNSYTR(7)-EQEKLGIK(4), GTLIDGKEFDNSYTR(7)-YMENSLKEQEKLGIK(11)	104	1.56e-06		√	√	16.2826
499	KPYK1(317)-KPYK1(286)	AEAGDVANAILDGTDAVMLSGESAKGK(25)-KVVITATQMLDSMIKNPR(15), AEAGDVANAILDGTDAVMLSGESAKGK(25)-VVITATQMLDSMIKNPR(14), AEAGDVANAILDGTDAVMLSGESAKGK(25)-VVITATQMLDSMIKNPRPTR(14)	103	3.78e-20		√	√	9.4641
500	EFTU1(209)-EFTU1(264),EFTU2(209)-EFTU2(264)	AIDKPFLLPIEDVFSISGR(4)-KLLDEGR(1)	102	1.44e-13		√		24.0401
501	PTH(118)-PTH(143)	LGGGHGGHNGLKDIISK(12)-IGIGHPGDKNK(9)	102	4.18e-13		√	√	17.0897
502	TOP1(484)-TOP1(443)	FSEASLVKELEK(8)-KGDEDR(1)	101	2.38e-13		√		28.4896
503	EFG(594)-EFG(555)	LHFGSYHDVDSSELAFKLAASIAFK(17)-GGVIPGEYIPAVDKGIQEQLK(14)	100	3.18e-13		√	√	5.88787
504	GRPE(90)-GRPE(82)	FALEKFINELLPVIDSLDR(5)-RTELDIEKAHK(8), FALEKFINELLPVIDSLDR(5)-TELDIEKAHK(7)	100	5.63e-12		√	√	12.3264
505	CSPC(59)-CSPC(15)	TLAEGQNVEFEIQDGQKGPAAVNVTAI(17)-WFNESKGFGFITPADGSK(6)	99	1.31e-24				n.a.
506	RPOC(1192)-RPOC(1072)	LVITPVDGSDPYEEMIPKWR(18)-TAGGKDLRPALK(5)	99	6.19e-21		√	√	12.0396
507	RDGB(13)-RDGB(177)	VVLATGNVGKVR(10)-EEKSAISHR(3)	98	3.01e-15		√	√	11.908
508	SYH(65)-SYH(53)	AIGEVTDVVEKEMYTFEDR(11)-LPIVEQTPLFKR(11)	98	6.2e-14		√	√	11.5219
509	SURA(105)-SURA(293)	ISDEQLDQAIANIAKQNNMTLDQMR(15)-HILLKPSPIMTDEQAR(5)	97	2.05e-27		√		43.9999
510	SSB(63)-SSB(44)	VVLFGKLAEVASEYLR(6)-DKATGEMK(2)	97	2.94e-11		√	√	18.6679
511	SYV(1)-SYV(644)	MEKTYNPQDIEQPLYEHWEK(1)-NFCNKLWNASR(5)	97	1.74e-09				n.a.
512	AHPC(169)-AHPC(186)	AAQYVASHPGEVCPAKWK(16)-EGEATLAPSLDLVGKI(15)	96	2.5e-20				n.a.
513	F16PA(253)-F16PA(201)	NLLKGGIYLYPSTASHPDGK(4)-GKTYSINEGNYIK(2)	95	7.26e-28		√	√	8.27792
514	PTA(174)-PTA(200)	NTNITGVIVNKLNAPVDEQGR(11)-AKVNNVDPAK(2)	95	7.43e-15				n.a.
515	ACCA(53)-ACCA(46)	KIFADLGAWQIAQLAR(1)-EKSVELTR(2)	95	1.77e-14		√	√	10.2482
516	RPOB(1262)-RPOB(914)	STGSYSLVTQQPLGGKAQFGGQR(16)-ASDVKDSSLR(5)	95	6.56e-10		√	√	16.3556
517	SYV(909)-SYV(930)	IENKLANEGFVAR(4)-EKLEGYAEAK(2), IENKLANEGFVAR(4)-EREKLEGYAEAK(4)	94	4.36e-19				n.a.
518	SYK2(156)-SYK2(2)	ALRPLPDKFHGLQDQEVR(8)-SEQETR(1)	94	9.95e-12				n.a.
519	SODM(119)-SODM(68)	AEFEKAAASR(5)-LDQLPADKK(8)	94	1.41e-10		√	√	17.4621
520	ISCU(42)-ISCU(59)	NVGSFDNNDENVGSGMVGAPACGDVMKLQIK(27)-FKTYGCGSAIASSSLVTEWVK(2)	93	6.72e-27		√	√	4.68186
521	STPA(107)-STPA(117)	FTDVNGETKTWTGQGR(9)-TPKPIAQALAEGK(3)	93	1.54e-21		√	√	15.1858
522	SYK2(156)-SYK2(179)	ALRPLPDKFHGLQDQEVR(8)-YLDLIANDKSR(9)	93	3.56e-18				n.a.
523	IF2(194)-IF2(186)	KLEEEAR(1)-RKAEEEAR(2), RKLEEEAR(2)-KAEEEAR(1), KLEEEAR(1)-KAEEEARR(1), KLEEEAR(1)-KAEEEAR(1)	93	1.88e-10				n.a.
524	SYGB(592)-SYGB(584)	VSNILAKSDEVLSDR(7)-TLDAAAALAAANKR(13)	92	9.38e-23				n.a.
525	KPYK2(160)-KPYK2(85)	VFTEVTVGGPLSNNKGINK(15)-EGKVFLNIGDK(3)	92	5.68e-14				n.a.
526	TIG(361)-TIG(392)	TNELKADEER(5)-NKELMDNMR(2)	92	3.59e-13		√	√	15.8438
527	ENO(195)-ENO(62)	MGSEVFHHLAKVLK(11)-FLGKGVTK(4)	92	1.21e-12		√	√	15.57
528	ODP2(456)-ODP2(531)	KLDVKITPVVFIMK(5)-ELMTISKK(7), LDVKITPVVFIMK(4)-ELMTISKK(7)	91	3.88e-16				n.a.
529	DLDH(345)-DLDH(370)	HYFDPKVIPSIAYTEPEVAWVGLTEK(6)-EKGISYETATFPWAASGR(2), KHYFDPKVIPSIAYTEPEVAWVGLTEK(7)-EKGISYETATFPWAASGR(2)	90	1.16e-30		√	√	14.9112
530	AMPN(286)-AMPN(274)	TDTATDKDYLDIER(7)-GLNIFNSKYVLAR(8)	88	3.8e-18		√	√	11.4064
531	SYY(85)-SYY(250)	FQQAGHKPVALVGGATGLIGDPSFKAAER(25)-KTSPYK(1)	88	2.35e-15		√		24.4208
532	RS16(46)-RS16(76)	VGFFNPIASEKEEGTR(11)-VAALIKEVNK(6)	88	1.24e-09		√	√	14.3615
533	FABI(43)-FABI(201)	EGAELAFTYQNDKLK(13)-TLAASGIKDFR(8), EGAELAFTYQNDKLK(13)-TLAASGIKDFRK(8)	87	8.28e-14		√		22.008
534	YBAB(106)-YBAB(89)	MASVSSGMQLPPGFKMPF(15)-RIEETQKEK(7), MASVSSGMQLPPGFKMPF(15)-IEETQKEK(6)	87	1.86e-10				n.a.
535	G3P1(132)-G3P1(331)	DNTPMFVKGANFDK(8)-VLDLIAHISK(10)	86	5.41e-21		√	√	14.326
536	EFTU1(253)-EFTU1(295),EFTU2(253)-EFTU2(295)	ETQKSTCTGVEMFR(4)-GQVLAKPGTIKPHTK(6)	85	6.97e-26		√	√	9.0985
537	G6PD(344)-G6PD(25)	LPTKCSEVVVYFK(4)-KLLPSLYQLEK(1), RLPTKCSEVVVYFK(5)-KLLPSLYQLEK(1)	85	5.95e-21				n.a.
538	EFTS(95)-EFTS(125)	DAGFQAFADKVLDAAVAGK(10)-VALVAKIGENINIR(6)	85	7.57e-18		√	√	16.6615
539	AROA(411)-AROA(22)	CTAKTFPDYFEQLAR(4)-VDGTINLPGSKSVSNR(11)	85	3.83e-16		√	√	9.05825
540	SYW(181)-SYW(198)	VPEPFIPKSGAR(8)-MSKSDDNR(3)	85	6.26e-11				n.a.
541	RPOC(87)-RPOC(50)	GVICEKCGVEVTQTK(6)-TFKPER(3)	85	2.37e-06		√	√	14.6452
542	CLPB(335)-CLPB(199)	FQKVFVAEPSVEDTIAILR(3)-TKNNPVLIGEPGVGK(2), RFQKVFVAEPSVEDTIAILR(4)-TKNNPVLIGEPGVGK(2)	84	1.39e-27		√	√	9.96253
543	IMDH(428)-IMDH(396)	LKEIIHQQMGGLR(2)-GMGSLGAMSKGSSDR(10)	84	7.35e-15				n.a.
544	RIR1(154)-RIR1(648)	QLEGKYLVQNR(5)-ASKDGILR(3)	84	1.73e-06		√	√	8.77503
545	TGT(248)-TGT(285)	YLMGVGKPEDLVEGVR(7)-NGHLFVTDGVVKIR(12)	83	2.24e-18				n.a.
546	MAK(11)-MAK(206)	IGIDLGGTKTEVIALGDAGEQLYR(9)-LSGHALKGSEIIR(7)	83	3.69e-16				n.a.
547	NUSG(125)-NUSG(121)	PKTLFEPGEMVR(2)-LQQVGDKPR(7)	83	6.1e-15				n.a.
548	RS4(206)-RS4(77)	SDLSADINEHLIVELYSK(18)-NYYKEAAR(4)	83	2.78e-09		√	√	11.9383
549	SYY(85)-SYY(90)	FQQAGHKPVALVGGATGLIGDPSFKAAER(25)-KLNTEETVQEWVDK(1)	82	5.71e-21		√	√	11.6957
550	MOAB(141)-MOAB(2)	TLIFAMPGSTKACR(11)-SQVSTEFIPTR(1)	82	7.6e-16				n.a.
551	RL9(22)-RL9(1)	VANLGSLGDQVNVKAGYAR(14)-MQVILLDK(1)	81	2.96e-22		√	√	4.73682
552	RPOC(1132)-RPOC(781)	IPQESGGTKDITGGLPR(9)-KGLADTALK(1)	81	1.63e-16		√	√	12.6642
553	GPMA(113)-GPMA(248)	YGDEQVKQWR(7)-AAAVANQGKAK(9)	81	1.59e-14		√	√	15.3991
554	HSLU(109)-HSLU(72)	DLTDAAVKMVR(8)-LAKLANAPFIK(3)	81	3.02e-14		√	√	13.5225
555	GNSA(31)-GNSA(1)	NTGKEVSEIR(4)-MNIEELKK(1), NTGKEVSEIR(4)-MNIEELK(1)	81	4.48e-13		√	√	13.7943
556	SODM(87)-SODM(205)	NNAGGHANHSLFWKGLK(14)-FAAKK(4)	81	3.31e-09		√	√	15.9059
557	ENO(325)-ENO(333)	IQLVGDDLFVTNTKILK(14)-EGIEKGIANSILIK(5)	80	2.32e-23		√	√	12.4651
558	RS1(363)-RS1(450)	ANPWQQFAETHNKGDR(13)-KGAIVTGK(1), ANPWQQFAETHNKGDRVEGK(13)-KGAIVTGK(1)	80	2.12e-17				n.a.
559	BCP(40)-BCP(77)	VLVYFYPKAMTPGCTVQACGLR(8)-AGVDVLGISTDKPEKLSR(15)	80	1.75e-16				n.a.
560	F16PA(42)-F16PA(72)	DINKAGLVDILGASGAENVQGEVQQK(4)-LDLFANEKLK(8)	80	2.05e-10		√	√	17.048
561	RRF(15)-RRF(7)	MDKCVEAFK(3)-KDAEVR(1)	80	3.86e-10		√	√	11.1269
562	PANC(39)-PANC(181)	VALVPTMGNLHDGHMKLVDEAK(16)-AKDGLALSSR(2)	79	3.63e-14		√	√	14.3334
563	SYA(784)-SYA(744)	LLVSELSGVEPKMLR(12)-QLEKELQQLK(4)	79	7.89e-14				n.a.
564	EFG(323)-EFG(440)	HASDDEPFSALAFKIATDPFVGNLTFFR(14)-LAKEDPSFR(3)	79	3.25e-13		√	√	7.44575
565	PT1(96)-PT1(30)	DKHMTADAAAHEVIEGQASALEELDDEYLK(2)-KISADQVDQEVER(1)	78	5.57e-30		√	√	7.65554
566	EFTS(207)-EFTS(24)	EYQVQLDIAMQSGKPK(14)-TGAGMMDCKK(9)	78	4.67e-17		√	√	20.2714
567	PUR8(94)-PUR8(400)	TTNHDVKAVEYFLK(7)-YGIEKPYEK(5)	78	5.46e-13		√		61.4357
568	RPOB(844)-RPOB(900)	DTKLGPEEITADIPNVGEAALSK(3)-GETQLTPEEKLLR(10)	78	7.48e-12		√	√	17.1326
569	ACCD(240)-ACCD(8)	EKLPPGFQR(2)-IKSNITPTR(2)	78	1.6e-10				n.a.
570	GLNH(188)-GLNH(248)	ADAVLHDTPNILYFIKTAGNGQFK(16)-WFGTEPK(7)	78	1.56e-09		√		22.2289
571	DNAK(363)-DNAK(351)	KDVNPDEAVAIGAAVQGGVLTGDVK(1)-MPMVQKK(6)	78	3.79e-09		√	√	12.4172
572	RS1(504)-RS1(450)	DRVEDATLVLSVGDEVEAKFTGVDR(19)-KGAIVTGK(1), VEDATLVLSVGDEVEAKFTGVDR(17)-KGAIVTGK(1)	77	2.99e-14		√	√	8.35825
573	SYL(813)-SYL(738)	AKITVPVDATEEQVR(2)-LAKAPTDGEQDR(3)	76	1.18e-21		√		24.0861
574	EFTU1(209)-EFTU1(57),EFTU2(209)-EFTU2(57)	AIDKPFLLPIEDVFSISGR(4)-AFDQIDNAPEEKAR(12)	76	6.34e-21		√		26.152
575	CPDA(1)-CPDA(150)	MESLLTLPLAGEAR(1)-KLADAPER(1)	76	6.91e-14				n.a.
576	SYI(732)-SYI(2)	FCSVEMGSFYLDIIKDR(15)-SDYKSTLNLPETGFPMR(1)	75	1.82e-24				n.a.
577	DAPD(254)-DAPD(263)	YSLYCAVIVKK(10)-GKVGINELLR(2)	75	1.26e-23				n.a.
578	GCST(280)-GCST(353)	EHGTEKLVGLVMTEK(6)-VTKPVFVR(3)	75	3.88e-11		√	√	10.1845
579	PFLB(195)-PFLB(235)	VALYGIDYLMKDK(11)-ALGQMKEMAAK(6)	75	7.06e-11		√	√	14.0425
580	RL6(85)-RL6(138)	ALLNSMVIGVTEGFTKK(16)-GADKQVIGQVAADLR(4)	74	1.92e-22		√	√	8.61074
581	UDP(235)-UDP(33)	TQQEIPNAETMKQTESHAVK(12)-VEKIAALMDKPVK(3), TQQEIPNAETMKQTESHAVK(12)-NDLQGATLAIVPGDPDRVEKIAALMDK(20)	74	4.44e-16		√	√	10.8758
582	HSLU(293)-HSLU(109)	DLLPLVEGCTVSTKHGMVK(14)-DLTDAAVKMVR(8)	74	1.78e-11		√	√	12.258
583	TPIS(103)-TPIS(103)	TYHKESDELIAK(4)-TYHKESDELIAK(4)	74	2.15e-10		√	√	0
584	RPOB(1065)-RPOB(1073)	IQPGDKMAGR(6)-HGNKGVISK(4)	74	6.6e-07		√	√	6.92075
585	6PGD(260)-6PGD(454)	KDEDGNYLVDVILDEAANKGTGK(19)-DYFGAHTYKR(9), DEDGNYLVDVILDEAANKGTGK(18)-DYFGAHTYKR(9)	73	1.47e-17		√	√	15.3686
586	TIG(1)-TIG(81)	MQVSVETTQGLGR(1)-NFIDAIIKEK(8)	73	7.47e-16		√	√	10.9677
587	DNAK(304)-DNAK(299)	AKLESLVEDLVNR(2)-HMNIKVTR(5)	73	1.93e-15		√	√	9.12257
588	RHO(100)-RHO(1)	TGDTISGKIRPPK(8)-MNLTELK(1)	73	1.02e-13		√	√	8.82429
589	ODO1(54)-ODO1(1)	STFQQLPGTGVKPDQFHSQTR(12)-MQNSALK(1)	73	1.09e-11				n.a.
590	LPLA(176)-LPLA(134)	LAAKGITSVR(4)-KVSGSAYR(1)	73	4.18e-10		√		22.2668
591	SYY(85)-SYY(144)	FQQAGHKPVALVGGATGLIGDPSFKAAER(25)-DIGKHFSVNQMINK(4)	72	4.84e-21		√	√	16.1043
592	ACON2(759)-ACON2(728)	MDAAQLTEEGYYSVFGKSGAR(17)-LLDAHKGQLPTR(6)	72	1.24e-17		√	√	7.90656
593	STPA(57)-STPA(117)	QEKISTWLELMK(3)-TPKPIAQALAEGK(3)	72	1.43e-17				n.a.
594	SYV(930)-SYV(926)	EKLEGYAEAK(2)-APEAVIAKER(8)	72	4.45e-11				n.a.
595	PFLB(17)-PFLB(2)	LATAWEGFTKGDWQNEVNVR(10)-SELNEK(1)	72	1.06e-08		√	√	13.0764
596	K1PF(99)-K1PF(32)	LTEKDGEVTDFNFSGFEVTPADWER(4)-GEVNLVKTTGLHAAGK(7)	71	9.52e-21				n.a.
597	PARC(463)-PARC(456)	KELQADAQAYGDDRR(1)-KMNNLLK(1), KELQADAQAYGDDR(1)-KMNNLLK(1)	71	1.32e-14		√	√	10.9173
598	CAN(213)-CAN(220)	HGISNLKLK(7)-HANHK(5)	71	1.5e-14				n.a.
599	ODO2(297)-ODO2(300)	DVDTLGMADIEKK(12)-IKELAVK(2)	71	2.01e-12		√	√	5.05532
600	EFTS(222)-EFTS(24)	KFTGEVSLTGQPFVMEPSK(1)-TGAGMMDCKK(9)	71	1.83e-10		√		28.5771
601	SYM(597)-SYM(677)	VALIENAEFVEGSDKLLR(15)-PGHQVK(6), VALIENAEFVEGSDKLLR(15)-DIFLLSPDAGAKPGHQVK(18)	71	4.05e-09				n.a.
602	RCSB(140)-RCSB(154)	LLEKISAGGYGDKR(4)-LSPKESEVLR(4), LLEKISAGGYGDK(4)-LSPKESEVLR(4)	70	4.97e-11				n.a.
603	AAT(134)-AAT(116)	VWVSNPSWPNHKSVFNSAGLEVR(12)-VAADFLAKNTSVK(8)	70	5.57e-11		√	√	15.2743
604	FUMA(426)-FUMA(463)	DHPIYYAGPAKTPEGYASGSLGPTTAGR(11)-MDSYVDQLQAQGGSMIMLAKGNR(20)	69	3.42e-25				n.a.
605	SKP(39)-SKP(158)	IAIVNMGSLFQQVAQKTGVSNTLENEFK(16)-DITADVLKQVK(8)	69	1.07e-11		√	√	9.98221
606	DGAL(136)-DGAL(187)	AYYVGTDSKESGIIQGDLIAK(9)-TTYVIKELNDK(6)	69	1.06e-10		√	√	10.318
607	PFLB(235)-PFLB(2)	ALGQMKEMAAK(6)-SELNEK(1)	69	6.22e-08		√		22.4176
608	PROB(189)-PROB(172)	SNPQAELIKDVYGIDDALR(9)-LLLLTDQKGLYTADPR(8)	68	6.67e-17		√	√	10.014
609	EFG(440)-EFG(159)	LAKEDPSFR(3)-VVNQIKTR(6)	68	5.79e-12		√		38.3753
610	SYM(597)-SYM(143)	VALIENAEFVEGSDKLLR(15)-FVKGTCPK(3)	68	7.31e-12				n.a.
611	SUCC(372)-SUCC(359)	LADSGLNIIAAKGLTDAAQQVVAAVEGK(12)-LEGNNAELGAKK(11)	68	9.22e-11		√	√	10.8598
612	SYL(138)-SYL(146)	WEQKFFTELYK(4)-KGLVYK(1)	68	3.7e-07		√	√	12.4499
613	GTPC1(153)-GTPC1(153)	KPLWCGDTGPEVVQR(1)-KPLWCGDTGPEVVQR(1)	67	2.93e-27		√	√	0
614	ODO2(211)-ODO2(218)	NSTAMLTTFNEVNMKPIMDLR(15)-KQYGEAFEK(1)	67	4.32e-22		√	√	10.2755
615	OMPR(170)-OMPR(1)	EDEPMPLTSGEFAVLKALVSHPR(16)-MQENYK(1), EMFREDEPMPLTSGEFAVLKALVSHPR(20)-MQENYK(1)	67	3.75e-12				n.a.
616	CH10(20)-CH10(1)	EVETKSAGGIVLTGSAAAK(5)-MNIRPLHDR(1)	67	1.8e-11		√	√	16.3868
617	GPMA(248)-GPMA(39)	AAAVANQGKAK(9)-GVSEAKAAGK(6)	67	1.01e-08		√		23.4237
618	G6PD(147)-G6PD(25)	VVMEKPLGTSLATSQEINDQVGEYFEECQVYR(5)-KLLPSLYQLEK(1)	66	2.68e-36				n.a.
619	G6PD(71)-G6PD(25)	EALETFMKETIDEGLWDTLSAR(8)-KLLPSLYQLEK(1)	66	8.42e-23				n.a.
620	YGGN(115)-YGGN(122)	IIVQEMGESSKMR(11)-LTKLDAQLK(3)	66	6.27e-19				n.a.
621	HTPG(199)-HTPG(229)	SIISKYSDHIALPVEIEK(5)-INKAQALWTR(3)	66	9.97e-14		√	√	11.4359
622	SYK2(82)-SYK2(2)	IMGKASFVTLQDVGGR(4)-SEQETR(1)	66	1.38e-09				n.a.
623	ODO2(2)-ODO2(85)	SSVDILVPDLPESVADATVATWHK(1)-EGNSAGKETSAK(7)	66	6.34e-07				n.a.
624	RL9(57)-RL9(42)	RAELEAKLAEVLAAANAR(7)-KNIEFFEAR(1), AELEAKLAEVLAAANAR(6)-KNIEFFEAR(1)	65	3.32e-23		√	√	16.9727
625	SKP(85)-SKP(75)	TKLEKDVMAQR(5)-LQSMKAGSDR(5), LEKDVMAQR(3)-LQSMKAGSDR(5)	65	7.89e-12		√	√	10.2332
626	TIG(83)-TIG(361)	EKINPAGAPTYVPGEYK(2)-TNELKADEER(5)	65	1.99e-09		√		22.2274
627	PTGA(8)-PTGA(2)	LKSLVSDDKK(2)-GLFDK(1), LKSLVSDDK(2)-GLFDK(1)	65	2.13e-06				n.a.
628	SYC(269)-SYC(73)	MSKSLGNFFTVR(3)-NITDIDDKIIK(8)	64	7.5e-16		√	√	11.1297
629	DXR(217)-DXR(37)	KISVDSATMMNK(1)-VVALVAGKNVTR(8)	64	7.51e-15		√	√	15.7543
630	RCSB(180)-RCSB(187)	SIKTISSQK(3)-KSAMMK(1)	64	3.61e-08				n.a.
631	KPRS(231)-KPRS(194)	DCVLVDDMIDTGGTLCKAAEALK(17)-LLNDTDMAIIDKR(12)	63	3.19e-21				n.a.
632	HNS(32)-HNS(57)	ECTLETLEEMLEKLEVVVNER(13)-KLQQYR(1)	63	4.74e-14				n.a.
633	CH10(74)-CH10(1)	VGDIVIFNDGYGVKSEK(14)-MNIRPLHDR(1)	63	1.85e-13		√	√	17.5821
634	RS10(59)-RS10(11)	FTVLISPHVNKDAR(11)-LKAFDHR(2)	62	7.27e-20		√		32.6451
635	CH60(390)-CH60(277)	VGAATEVEMKEK(10)-VAAVKAPGFGDR(5)	62	1.47e-17		√	√	12.9686
636	RIMP(143)-RIMP(2)	DEVFALSNIQKANLVPHF(11)-STLEQK(1), AVDGEMITVTVEGKDEVFALSNIQKANLVPHF(25)-STLEQK(1)	62	1.97e-07				n.a.
637	IMDH(411)-IMDH(428)	YFQSDNAADKLVPEGIEGR(10)-LKEIIHQQMGGLR(2)	61	1.39e-24				n.a.
638	YJGA(117)-YJGA(56)	HNQQVVLFHKLENLR(10)-NALDKIPLDADLR(5)	61	1.97e-16				n.a.
639	PTA(71)-PTA(38)	ANSSTTTAAEPLKMSYVEGLLSSNQK(13)-LSVFKPIAQPR(5)	61	5.82e-12				n.a.
640	HSLU(240)-HSLU(293)	LVNPEELKQDAIDAVEQHGIVFIDEIDK(8)-DLLPLVEGCTVSTKHGMVK(14)	61	4.82e-10		√	√	9.74676
641	GRCA(26)-GRCA(1)	AANDDLLNSFWLLDSEKGEAR(17)-MITGIQITK(1)	60	4.75e-24				n.a.
642	RLMN(2)-RLMN(251)	SEQLVTPENVTTK(1)-KYNIETFLAAVR(1)	60	3.9e-23				n.a.
643	K1PF(41)-K1PF(185)	TTGLHAAGKGINVAK(9)-AAPWLVKPNR(7)	60	6.78e-23				n.a.
644	ACON2(835)-ACON2(539)	LPTPEEYQTYVAQVDKTAVDTYR(16)-GKMQPGITLR(2)	60	3.29e-22		√	√	18.2439
645	STPA(117)-STPA(2)	TPKPIAQALAEGK(3)-SVMLQSLNNIR(1)	60	1.81e-21				n.a.
646	PYRB(30)-PYRB(2)	DDLNLVLATAAKLK(12)-ANPLYQK(1)	60	7.5e-19		√	√	15.8435
647	FOLX(102)-FOLX(22)	EHHWVTYAEVEIDKLHALR(14)-TFIGIKEEEINNR(6)	60	5.33e-18		√	√	14.7221
648	ACP(10)-ACP(1)	KIIGEQLGVK(1)-MSTIEER(1)	60	3.26e-13		√	√	13.1411
649	PTNAB(225)-PTNAB(234)	TLLTQVAPPGVTAHVVDVAKMIR(20)-VYNNPKYAGER(6)	60	6.08e-12		√	√	14.7243
650	PHNA(67)-PHNA(104)	VKGSSSMLK(2)-LKSEFVK(2)	60	1.5e-09				n.a.
651	EFTU1(57)-EFTU1(5),EFTU2(57)-EFTU2(5)	AFDQIDNAPEEKAR(12)-EKFER(2)	60	4.25e-09		√	√	21.0653
652	HSLU(72)-HSLU(2)	LAKLANAPFIK(3)-SEMTPR(1)	60	1.3e-08		√	√	10.3091
653	SYH(53)-SYH(53)	LPIVEQTPLFKR(11)-LPIVEQTPLFKR(11)	59	1.02e-28		√	√	0
654	GLMU(15)-GLMU(156)	MLNNAMSVVILAAGKGTR(15)-VTGIVEHKDATDEQR(8)	59	8.51e-19		√	√	18.0738
655	PHSM(54)-PHSM(2)	AQPFAKPVANQR(6)-SQPIFNDK(1)	59	8.67e-15		√	√	8.79085
656	PT1(174)-PT1(60)	IIDLSAIQDEVILVAADLTPSETAQLNLKK(29)-TKAGETFGEEK(2)	59	5.36e-14		√	√	13.0198
657	GLNB(58)-GLNB(9)	GAEYMVDFLPKVK(11)-IDAIIKPFK(6), GAEYMVDFLPKVK(11)-KIDAIIKPFK(7)	59	4.62e-13		√	√	5.43911
658	YBIS(132)-YBIS(156)	GTNTVIVLPIGIGQLGKDTPINWTTK(17)-AGPTWTPTAKMHAEYR(10)	59	4.25e-11				n.a.
659	RAIA(80)-RAIA(87)	HEDMYTAINELINKLER(14)-QLNKLQHK(4)	59	5.13e-10		√	√	10.5789
660	DBHB(18)-DBHB(3)	IAAGADISKAAAGR(9)-MNKSQLIDK(3)	59	9.2e-08		√	√	11.6333
661	GSHB(174)-GSHB(205)	VKEGDPNLGVIAETLTEHGTR(2)-YCMAQNYLPAIKDGDKR(12), VKEGDPNLGVIAETLTEHGTR(2)-YCMAQNYLPAIKDGDK(12)	58	3.2e-22		√	√	15.6401
662	YHGF(89)-YHGF(1)	LTDDLAKAINATLSK(7)-MMNDSFCR(1)	58	4.71e-17				n.a.
663	TIG(227)-TIG(327)	AGEEFTIDVTFPEEYHAENLKGK(21)-FGGNEKQALELPR(6)	58	1.02e-16		√		35.6535
664	RPOB(1158)-RPOB(1)	QKVDLSTFSDEEVMR(2)-MVYSYTEK(1)	58	2.14e-16				n.a.
665	SYA(750)-SYA(784)	ELQQLKEQAAAQESANLSSK(6)-LLVSELSGVEPKMLR(12)	58	2.14e-16				n.a.
666	EFTU1(253)-EFTU1(264),EFTU2(253)-EFTU2(264)	ETQKSTCTGVEMFR(4)-KLLDEGR(1)	58	1.97e-13		√		24.3459
667	IHFB(27)-IHFB(1)	TVEDAVKEMLEHMASTLAQGER(7)-MTKSELIER(1)	58	3.57e-09		√	√	14.8313
668	CDD(265)-CDD(208)	AVLAEKADAPLIQWDATSATLK(6)-SHMPYSKSPSGVALECK(7)	57	1.24e-21		√	√	9.56292
669	RPOC(1151)-RPOC(1132)	RPKEPAILAEISGIVSFGK(3)-IPQESGGTKDITGGLPR(9)	57	2.13e-17		√	√	10.5168
670	YPFJ(103)-YPFJ(182)	MGKTYQQPK(3)-LLGIEPKVR(7)	57	1e-12				n.a.
671	HNS(136)-HNS(57)	SLDDFLIKQ(8)-KLQQYR(1)	57	1.8e-12				n.a.
672	OPPA(331)-OPPA(410)	DIIVNKVK(6)-KNIGVNVK(1), LGMDRDIIVNKVK(11)-KNIGVNVK(1)	57	4.63e-10		√	√	16.1807
673	RNB(1)-RNB(68)	MFQDNPLLAQLK(1)-IIAVIHSEKER(9)	56	7.23e-18				n.a.
674	SYM(133)-SYM(597)	TISQLYDPEKGMFLPDR(10)-VALIENAEFVEGSDKLLR(15)	56	6.33e-17				n.a.
675	GRCA(62)-GRCA(1)	EVPVEVKPEVR(7)-MITGIQITK(1)	56	1.28e-12				n.a.
676	GNSB(31)-GNSB(1)	TGKEVTSIQFTAR(3)-MNIENLK(1)	56	2.46e-12				n.a.
677	ACCD(8)-ACCD(2)	IKSNITPTR(2)-SWIER(1)	56	3.08e-08				n.a.
678	YECF(2)-YECF(47)	STPDFSTAENNQELANEVSCLK(1)-MEKQLALIEDETQAAVFSK(3)	55	3.03e-36				n.a.
679	PFLB(454)-PFLB(162)	TMLYAINGGVDEKLK(13)-KSGVLTGLPDAYGR(1)	55	1.38e-18		√	√	11.0347
680	EFTS(10)-EFTS(24)	AEITASLVKELR(9)-TGAGMMDCKK(9)	55	2.62e-15		√	√	8.6954
681	ACCD(100)-ACCD(8)	LASAQKETGEK(6)-IKSNITPTR(2)	55	3.33e-11				n.a.
682	FKBA(69)-FKBA(110)	EQEKLGIK(4)-VKSSAQAK(2)	55	6.72e-08		√	√	11.8581
683	PHOL(331)-PHOL(281)	KAALAAER(1)-NTKSGLR(3)	55	4.81e-06				n.a.
684	CYSG(107)-CYSG(166)	IFCNVVDAPKAASFIMPSIIDR(10)-VKQQFATMGER(2)	54	1.06e-19				n.a.
685	GLPX(22)-GLPX(327)	VTESAALAGYKWLGR(11)-KDPEMQVHIL(1)	54	1.25e-16				n.a.
686	ACCD(16)-ACCD(8)	KASIPEGVWTK(1)-IKSNITPTR(2)	54	5.84e-13				n.a.
687	EFG(609)-EFG(497)	AKPVLLEPIMK(2)-QKVTDVEGK(2)	54	5.1e-11		√	√	6.77339
688	MAO2(432)-MAO2(1)	TNLFMKPIFSQAR(6)-MDDQLK(1)	54	6.52e-09				n.a.
689	SYA(232)-SYA(56)	QADGTMEPLPKPSVDTGMGLER(11)-DVFLGLDKR(8)	53	9.36e-12		√	√	11.4699
690	ODO2(94)-ODO2(85)	SEEKASTPAQR(4)-EGNSAGKETSAK(7)	53	2.32e-08				n.a.
691	FIS(25)-FIS(32)	VNSDVLTVSTVNSQDQVTQKPLR(20)-DSVKQALK(4)	53	3.79e-08		√	√	11.5238
692	TRPR(72)-TRPR(2)	ELKNELGAGIATITR(3)-AQQSPYSAAMAEQR(1)	52	6.51e-24		√	√	15.7029
693	DNAK(321)-DNAK(352)	SIEPLKVALQDAGLSVSDIDDVILVGGQTR(6)-KVAEFFGK(1)	52	1.71e-14		√	√	12.9287
694	GUAA(351)-GUAA(381)	WLAQGTIYPDVIESAASATGKAHVIK(21)-MGLVEPLKELFKDEVR(12), WLAQGTIYPDVIESAASATGKAHVIK(21)-ELFKDEVR(4)	52	8.76e-10				n.a.
695	RPOB(1200)-RPOB(1127)	ELLKLGDLPTSGQIR(4)-GIGDKINAMLK(5)	52	8.82e-09		√	√	10.8998
696	TIG(287)-TIG(279)	VKSQAIEGLVK(2)-ELKSAIR(3)	52	9.81e-06		√	√	11.8025
697	PNP(690)-PNP(657)	LSIKEATEQSQPAAAPEAPAAEQGE(4)-EGLVHISQIADKR(12)	51	6.01e-19		√	√	11.8589
698	PT1(175)-PT1(60)	KVLGFITDAGGR(1)-TKAGETFGEEK(2)	51	2.84e-18		√	√	14.5972
699	YIHD(77)-YIHD(61)	DYEEDFKTALLR(7)-DSAKDAVIPGLQK(4)	51	3.86e-12				n.a.
700	LON(761)-LON(741)	DLEEIPDNVIADLDIHPVKR(19)-TVLIPFENKR(9)	51	2.85e-09		√	√	10.8788
701	CH60(272)-CH60(226)	GIVKVAAVK(4)-KISNIR(1)	51	9.16e-07		√	√	11.8809
702	SYW(58)-SYW(55)	KATLDTLALYLACGIDPEK(1)-QDAQKLR(5)	51	9.66e-07				n.a.
703	MENB(98)-MENB(54)	GDYGGYKDDSGVHHLNVLDFQR(7)-NAFRPLTVKEMIQALADAR(9)	50	3.71e-26		√	√	12.7038
704	TIG(390)-TIG(361)	EVIEFYSKNK(8)-TNELKADEER(5), GLIEEMASAYEDPKEVIEFYSKNK(22)-TNELKADEER(5)	50	5.45e-14		√	√	19.9821
705	TALB(294)-TALB(301)	ITESEFLWQHNQDPMAVDKLAEGIR(19)-KFAIDQEK(1)	50	1.36e-12		√	√	10.2585
706	PYRG(479)-PYRG(432)	YEVNNMLLKQIEDAGLR(9)-SEKSDLGGTMR(3)	50	2.14e-12				n.a.
707	LON(371)-LON(509)	TSLGQSIAKATGR(9)-HLLPKQIER(5)	50	1.71e-11				n.a.
708	LIPA(44)-LIPA(37)	IKLPADSTR(2)-KPEWMK(1)	50	1.98e-11				n.a.
709	NADC(186)-NADC(154)	LGLSDAFLIKENHIIASGSVR(10)-KTLPGLR(1)	50	4.15e-11				n.a.
710	EFG(497)-EFG(159)	QKVTDVEGK(2)-VVNQIKTR(6)	50	4.26e-11		√		65.0013
711	TOP1(28)-TOP1(15)	YLGSDYVVKSSVGHIR(9)-AKTINK(2)	50	6.42e-09		√	√	7.79182
712	OPPA(399)-OPPA(331)	KLAIAASSLWK(1)-DIIVNKVK(6)	50	1.51e-08		√	√	9.30966
713	ODO1(91)-ODO1(71)	QVKVLQLINAYR(3)-LAKDASR(3)	50	1.05e-05				n.a.
714	TIG(382)-TIG(83)	GLIEEMASAYEDPKEVIEFYSKNK(14)-EKINPAGAPTYVPGEYK(2)	49	1.2e-21		√		42.9702
715	TYPA(337)-TYPA(50)	LNKELVHNVALR(3)-VMDSNDLEKER(9)	49	5.78e-19				n.a.
716	GLNB(58)-GLNB(90)	GAEYMVDFLPKVK(11)-IGDGKIFVFDVAR(5)	49	7.58e-16		√	√	11.3706
717	CAPP(94)-CAPP(1)	AFSQFLNLANTAEQYHSISPKGEAASNPEVIAR(21)-MNEQYSALR(1)	49	7.2e-14				n.a.
718	RHO(115)-RHO(100)	YFALLKVNEVNFDKPENAR(6)-TGDTISGKIRPPK(8)	49	1.09e-12		√	√	4.75228
719	HNS(6)-HNS(57)	SEALKILNNIR(5)-KLQQYR(1)	49	4.33e-12				n.a.
720	TNAA(115)-TNAA(459)	GAEQIYIPVLIKK(12)-GLTFTYEPKVLR(9)	49	5.48e-12		√	√	13.9979
721	GYRA(764)-GYRA(769)	TAVAEYPTKSR(9)-ATKGVISIK(3)	49	1.85e-11		√	√	9.97095
722	GYRB(2)-GYRB(14)	SNSYDSSSIK(1)-VLKGLDAVR(3)	49	6.51e-11				n.a.
723	SUCC(79)-SUCC(61)	AFAENWLGKR(9)-AGGVKVVNSK(5)	49	2.95e-10		√	√	16.0416
724	NRDR(138)-NRDR(53)	SFEDIKEFGEEIAR(6)-VVKSNDVR(3)	49	1e-08				n.a.
725	FIS(25)-FIS(1)	VNSDVLTVSTVNSQDQVTQKPLR(20)-MFEQR(1)	49	1.88e-08		√		23.4587
726	ENGB(50)-ENGB(57)	SSALNTLTNQKSLAR(11)-TSKTPGR(3)	49	5.26e-07				n.a.
727	IMDH(479)-IMDH(411)	ISGAGIQESHVHDVTITKESPNYR(18)-YFQSDNAADKLVPEGIEGR(10)	48	2.84e-16				n.a.
728	RL7(85)-RL7(66)	EAKDLVESAPAALK(3)-AAGANKVAVIK(6)	48	2.07e-06		√	√	7.90873
729	DLDH(339)-DLDH(299)	KHYFDPK(1)-VDKQLR(3)	48	8.53e-06		√	√	10.9558
730	GLMM(147)-GLMM(44)	EISCVDSAELGKASR(12)-KIIIGK(1), LPDAVEEAIEAEMEKEISCVDSAELGKASR(27)-KIIIGK(1)	47	1.02e-27				n.a.
731	YJJA(146)-YJJA(150)	DGQQLNLDNIGTTPLAEKVK(18)-TKACDLVLK(2)	47	1.6e-22				n.a.
732	SYK1(2)-SYK1(114)	SEQHAQGADAVVDLNNELK(1)-DDLPEGVYNEQFKK(13)	47	2.92e-22				n.a.
733	RS5(156)-RS5(159)	ATIDGLENMNSPEMVAAKR(18)-GKSVEEILGK(2)	47	1.6e-19		√	√	4.85826
734	IDH(265)-IDH(273)	EEFGGELIDGGPWLKVK(15)-NPNTGKEIVIK(6)	47	7.84e-18		√	√	9.25116
735	RF2(314)-RF2(302)	QAMEDNKSDIGWGSQIR(7)-LYELEMQKK(8)	47	9.98e-15		√	√	17.0146
736	GUAA(351)-GUAA(517)	WLAQGTIYPDVIESAASATGKAHVIK(21)-VVYDISGKPPATIEWE(8)	47	2.6e-13				n.a.
737	IF3(97)-IF3(125)	EIKFRPGTDEGDYQVK(3)-FLEEGDKAKITLR(9), EIKFRPGTDEGDYQVK(3)-AKITLR(2)	47	1.93e-10		√	√	8.21405
738	CH10(34)-CH10(1)	SAGGIVLTGSAAAKSTR(14)-MNIRPLHDR(1)	47	3.23e-10		√	√	18.9945
739	OMPR(184)-OMPR(1)	DKLMNLAR(2)-MQENYK(1)	47	8.54e-09				n.a.
740	KAD(145)-KAD(157)	VEGKDDVTGEELTTR(4)-KDDQEETVR(1)	46	4.74e-21		√	√	17.9861
741	DEOD(143)-DEOD(238)	NAVDAAKALGIDAR(7)-IALESVLLGDKE(11)	46	1.6e-13		√	√	15.5809
742	DGAL(269)-DGAL(331)	SSIPVFGVDALPEALALVKSGALAGTVLNDANNQAK(19)-VPYVGVDKDNLAEFSKK(16), SSIPVFGVDALPEALALVKSGALAGTVLNDANNQAK(19)-DNLAEFSKK(8)	46	1.13e-12		√	√	10.8476
743	PFLB(195)-PFLB(2)	VALYGIDYLMKDK(11)-SELNEK(1), VALYGIDYLMKDK(11)-SELNEKLATAWEGFTK(1)	46	2.22e-12		√	√	10.639
744	GLRX4(101)-GLRX4(108)	GELQQLIKETAAK(8)-YKSEEPDAE(2)	46	3.7e-11		√	√	10.1418
745	APT(39)-APT(53)	DVTSLLEDPKAYALSIDLLVER(10)-YKNAGITK(2)	46	6e-08		√	√	17.0962
746	ODO1(589)-ODO1(576)	QAMAAGEKLFDWGGAENLAYATLVDEGIPVR(8)-VAKIYGDR(3)	46	1.17e-07		√	√	13.4577
747	TIG(83)-TIG(1)	EKINPAGAPTYVPGEYK(2)-MQVSVETTQGLGR(1)	45	4.18e-28		√	√	15.2511
748	DNAK(452)-DNAK(502)	AADNKSLGQFNLDGINPAPR(5)-ITIKASSGLNEDEIQK(4)	45	5.56e-25		√	√	11.1036
749	PFLB(7)-PFLB(195)	SELNEKLATAWEGFTK(6)-VALYGIDYLMKDK(11)	45	9.44e-14		√	√	14.5405
750	CLPX(297)-CLPX(192)	ASEGELLAQVEPEDLIKFGLIPEFIGR(17)-KSDNPSITR(1)	45	3.5e-13				n.a.
751	AMPA(134)-AMPA(1)	QAVETAKETLYSFDQLK(7)-MEFSVK(1)	45	5.86e-09		√	√	7.51305
752	RNE(189)-RNE(196)	LKHWEAIK(2)-KAAESR(1)	45	1.37e-08		√	√	10.509
753	FTSZ(329)-FTSZ(170)	RPEITLVTNKQVQQPVMDR(10)-LLKVLGR(3)	45	6.44e-08				n.a.
754	TIG(29)-TIG(48)	VTITIAADSIETAVKSELVNVAK(15)-GKVPMNIVAQR(2)	44	2.68e-20		√	√	15.7907
755	PYRG(189)-PYRG(223)	TKPTQHSVKELLSIGIQPDILICR(2)-AKIALFCNVPEK(2), TKPTQHSVK(2)-AKIALFCNVPEK(2)	44	7.4e-16		√	√	10.1877
756	CH60(327)-CH60(277)	VVINKDTTTIIDGVGEEAAIQGR(5)-VAAVKAPGFGDR(5)	44	4.12e-15		√	√	9.57233
757	EFTU1(38)-EFTU1(57),EFTU2(38)-EFTU2(57)	TTLTAAITTVLAKTYGGAAR(13)-AFDQIDNAPEEKAR(12)	44	2.42e-12		√	√	21.6592
758	RS1(434)-RS1(450)	ISLGVKQLAEDPFNNWVALNK(6)-KGAIVTGK(1)	44	3.94e-11				n.a.
759	YIIQ(177)-YIIQ(74)	YVVADNGEKGLTFAVEPIK(9)-AIDSSPDKANLTR(8)	44	1.19e-09				n.a.
760	IMDH(411)-IMDH(110)	YFQSDNAADKLVPEGIEGR(10)-EVKELTER(3)	44	3.79e-09				n.a.
761	PHSM(471)-PHSM(495)	QCNPALAALLDKSLQK(12)-FADDAKFR(6)	44	1.08e-08		√	√	13.0669
762	RPOB(1242)-RPOB(1065)	LNHLVDDKMHAR(8)-IQPGDKMAGR(6)	44	1.75e-08		√	√	10.413
763	ERA(32)-ERA(39)	LLGQKISITSR(5)-KAQTTR(1)	44	1.77e-08		√	√	21.2303
764	ACON2(759)-ACON2(722)	MDAAQLTEEGYYSVFGKSGAR(17)-AAGKLLDAHK(4)	43	6.3e-17		√	√	12.6511
765	FOLX(62)-FOLX(22)	TVTKNIIQHVENNR(4)-TFIGIKEEEINNR(6)	43	8.83e-17		√	√	17.7472
766	AMN(356)-AMN(367)	ALYDATKLVSGR(7)-PGEEVKQR(6)	43	4.76e-16		√	√	9.35313
767	CH60(327)-CH60(42)	VVINKDTTTIIDGVGEEAAIQGR(5)-NVVLDKSFGAPTITK(6)	43	5.52e-16		√	√	17.2882
768	RL28(10)-RL28(26)	VCQVTGKR(7)-SHALNATKR(8), VCQVTGKRPVTGNNR(7)-SHALNATKR(8)	43	1.19e-15		√	√	17.6232
769	NUOF(55)-NUOF(78)	ALTGLSPDEIVNQVKDAGLK(15)-WSLMPKDESMNIR(6)	43	1.35e-14				n.a.
770	EFG(323)-EFG(555)	HASDDEPFSALAFKIATDPFVGNLTFFR(14)-GGVIPGEYIPAVDKGIQEQLK(14)	43	8.01e-14		√		51.3467
771	PUR8(362)-PUR8(19)	NLGVGIGYALIAYQSTLKGVSK(18)-YGDKVSALR(4)	43	1.29e-12		√	√	12.2325
772	PANC(236)-PANC(206)	DLDEIITIAGQELNEKGFR(16)-IAPGLYKVLSSIADK(7)	43	1.56e-12		√	√	10.4961
773	PNP(690)-PNP(675)	LSIKEATEQSQPAAAPEAPAAEQGE(4)-VTDYLQMGQEVPVKVLEVDR(14)	43	1.12e-11		√	√	7.16105
774	APT(23)-APT(90)	SIQDYPKPGILFR(7)-KPGKLPR(4)	43	1.68e-11		√	√	14.0346
775	PHOU(116)-PHOU(108)	TALEKFSQQHQPLLVSLESLGR(5)-IGDVADKICR(7)	43	7.89e-10				n.a.
776	ENO(405)-ENO(180)	VAKYNQLIR(3)-TVKEAIR(3)	43	1.38e-08		√	√	11.8614
777	GUAA(381)-GUAA(517)	MGLVEPLKELFKDEVR(12)-VVYDISGKPPATIEWE(8), ELFKDEVR(4)-VVYDISGKPPATIEWE(8)	43	7.7e-08		√		22.3831
778	TIG(327)-TIG(327)	FGGNEKQALELPR(6)-FGGNEKQALELPR(6)	43	2.08e-06		√	√	0
779	RNB(107)-RNB(89)	LAIVPDHPLLKDAIPCR(11)-FVGKVQGK(4)	43	6.96e-06		√	√	11.0351
780	ERPA(103)-ERPA(2)	FIVTNPNAKSTCGCGSSFSI(9)-SDDVALPLEFTDAAANK(1)	42	2.29e-19				n.a.
781	EFTU1(238)-EFTU1(295),EFTU2(238)-EFTU2(295)	GIIKVGEEVEIVGIK(4)-GQVLAKPGTIKPHTK(6)	42	3.45e-18		√	√	10.2701
782	MUG(109)-MUG(151)	IEDYQPQALAILGKQAYEQGFSQR(14)-VSLEKLVEAYR(5)	42	6.7e-14		√	√	14.3661
783	ODP1(404)-ODP1(412)	GYGMGDAAEGKNIAHQVK(11)-KMNMDGVR(1)	42	2.3e-13		√	√	14.6996
784	HLDD(199)-HLDD(267)	GSMASVAFHLNTQLNNGESPKLFEGSENFK(21)-GQIEYIPFPDKLK(11)	42	5.11e-12		√	√	17.3549
785	LIPA(44)-LIPA(56)	IKLPADSTR(2)-IQGIKAAMR(5)	42	2.81e-11				n.a.
786	MIND(163)-MIND(94)	ILGILASKSR(8)-DKDALTR(2)	42	1.18e-10		√	√	14.0402
787	YIFE(98)-YIFE(15)	FHTLSGGKPQVEGAEDYTDSDD(8)-YFDNKHYPR(5)	42	7.58e-10				n.a.
788	RNC(210)-RNC(35)	KAEQAAAEQALK(1)-SASSKHNER(5)	42	6.76e-09				n.a.
789	RL7(85)-RL7(71)	EAKDLVESAPAALK(3)-VAVIKAVR(5)	42	2.86e-08		√	√	9.06
790	IMDH(428)-IMDH(203)	LKEIIHQQMGGLR(2)-DFQKAER(4)	42	2.43e-07				n.a.
791	EFTU1(264)-EFTU1(264),EFTU2(264)-EFTU2(264)	KLLDEGR(1)-KLLDEGR(1)	42	3.13e-07		√	√	0
792	ODO1(54)-ODO1(71)	STFQQLPGTGVKPDQFHSQTR(12)-LAKDASR(3)	42	2.83e-06				n.a.
793	FIS(32)-FIS(1)	DSVKQALK(4)-MFEQR(1)	42	8.51e-06		√		30.2484
794	EFPL(23)-EFPL(51)	LLLVKDIDIQSPTAR(5)-TGLKVEER(4)	42	5.24e-05				n.a.
795	ACON2(835)-ACON2(759)	LPTPEEYQTYVAQVDKTAVDTYR(16)-MDAAQLTEEGYYSVFGKSGAR(17)	41	3.44e-21		√		23.195
796	AHPC(153)-AHPC(186)	IKAAQYVASHPGEVCPAK(2)-EGEATLAPSLDLVGKI(15)	41	6.02e-17				n.a.
797	AHPC(80)-AHPC(186)	LGVDVYAVSTDTHFTHKAWHSSSETIAK(17)-EGEATLAPSLDLVGKI(15)	41	2.97e-12				n.a.
798	SYD(415)-SYD(283)	VGKDLGLTDESK(3)-YGSDKPDLR(5)	41	7.83e-09		√	√	16.2474
799	ORN(154)-ORN(138)	WKPEILDGFTKQGTHQAMDDIR(11)-YLDVSTLKELAR(8)	41	1.81e-06		√	√	11.2217
800	RPOA(246)-RPOA(1)	EEKPEFDPILLRPVDDLELTVR(3)-MQGSVTEFLKPR(1)	40	4.67e-42		√		32.428
801	RPOA(95)-RPOA(1)	VQGKDEVILTLNK(4)-MQGSVTEFLKPR(1)	40	2.79e-17		√	√	11.1354
802	HIS6(236)-HIS6(19)	DADVDGALAASVFHKQIINIGELK(15)-DGQVVKGVQFR(6)	40	6.3e-16				n.a.
803	CRL(15)-CRL(2)	KFTALGPYIR(1)-TLPSGHPK(1)	40	1.27e-12				n.a.
804	HSLU(118)-HSLU(2)	VQAIEKNR(6)-SEMTPR(1)	40	9.09e-11		√	√	16.3019
805	RPOC(983)-RPOC(959)	NTELKLIDEFGR(5)-GSIKLSNVK(4)	40	9.74e-11		√	√	4.8715
806	GPMA(239)-GPMA(113)	YYLGNADEIAAKAAAVANQGK(12)-YGDEQVKQWR(7)	40	5.1e-10		√	√	18.6072
807	GATR(48)-GATR(86)	FLEQKGVVTR(5)-FQLASAPKNR(8)	40	3.19e-09				n.a.
808	KAD(136)-KAD(40)	VYHVKFNPPK(5)-AAVKSGSELGK(4)	40	6.15e-09		√		27.031
809	TYPA(50)-TYPA(324)	VMDSNDLEKER(9)-EGKFVTSR(3)	40	6.78e-08				n.a.
810	YJGA(87)-YJGA(40)	QLQLIGKMLR(7)-DAEELKR(6)	40	2.18e-06				n.a.
811	PCKA(523)-PCKA(91)	LFIDNFDKYTDTPAGAALVAAGPK(8)-GKNDNKPLSPETWQHLK(2)	39	1.05e-25		√	√	9.89642
812	DNAK(581)-DNAK(528)	TAIESALTALETALKGEDKAAIEAK(19)-KFEELVQTR(1), GEDKAAIEAK(4)-KFEELVQTR(1)	39	7.11e-17		√	√	8.39851
813	ISPG(256)-ISPG(1)	VGFDILKSLR(7)-MHNQAPIQR(1)	39	2.12e-14				n.a.
814	GPMA(239)-GPMA(33)	YYLGNADEIAAKAAAVANQGK(12)-FTGWYDVDLSEKGVSEAK(12)	39	2.22e-13		√	√	13.9941
815	ODO2(133)-ODO2(300)	LLAEHNLDASAIKGTGVGGR(13)-IKELAVK(2)	39	9.62e-13				n.a.
816	PSPA(27)-PSPA(2)	AEDPQKLVR(6)-GIFSR(1)	39	9.89e-11				n.a.
817	ENO(357)-ENO(328)	FNQIGSLTETLAAIKMAK(15)-ILKEGIEK(3)	39	3.6e-10		√	√	11.1704
818	MIND(175)-MIND(163)	AENGEEPIKEHLLLTR(9)-ILGILASKSR(8)	39	8.96e-10		√	√	14.0081
819	RRF(15)-RRF(26)	MDKCVEAFK(3)-TQISKIR(5)	39	1.97e-08		√	√	17.0473
820	LPXD(315)-LPXD(331)	KTAALVMNIDDMSK(1)-LKSLER(2)	39	1.04e-07		√	√	14.9492
821	FABG(99)-FABG(119)	MKDEEWNDIIETNLSSVFR(2)-LSKAVMR(3)	39	8.93e-06		√	√	9.41915
822	MANA(43)-MANA(280)	TALTELYGMENPSSQPMAELWMGAHPKSSSR(27)-AGLTPKYIDIPELVANVK(6)	38	6.05e-28				n.a.
823	CLPB(522)-CLPB(530)	QLEAATQLEGKTMR(11)-NKVTDAEIAEVLAR(2)	38	1.24e-19				n.a.
824	EFG(618)-EFG(643)	AKPVLLEPIMKVEVETPEENTGDVIGDLSR(11)-GMLKGQESEVTGVK(4)	38	5.99e-18		√	√	8.34276
825	HTPG(238)-HTPG(362)	NKSEITDEEYKEFYK(2)-VLQMLEKLAK(7)	38	9.05e-15		√	√	16.5783
826	IF1(39)-IF1(42)	VELENGHVVTAHISGKMR(16)-KNYIR(1)	38	2.68e-14		√	√	6.89544
827	KAD(57)-KAD(40)	DIMDAGKLVTDELVIALVK(7)-AAVKSGSELGK(4)	38	8.68e-12		√	√	17.8009
828	ATPA(384)-ATPA(388)	VGGAAQTKIMK(8)-KLSGGIR(1)	38	8.87e-12		√	√	6.40572
829	YEEX(33)-YEEX(33)	EIQDVEKK(7)-EIQDVEKK(7)	38	2.44e-11				n.a.
830	PYRE(103)-PYRE(26)	EAKDHGEGGNLVGSALQGR(3)-FGEFTLKSGR(7)	38	2.84e-11		√	√	15.6245
831	IF2(184)-IF2(173)	EQEAAELKR(8)-NAQAEKAR(6), REQEAAELKR(9)-NAQAEKAR(6)	38	8.27e-11				n.a.
832	HSLU(63)-HSLU(2)	NILMIGPTGVGKTEIAR(12)-SEMTPR(1)	38	5.77e-10		√	√	21.6641
833	PFLB(117)-PFLB(135)	ALIPFGGIKMIEGSCK(9)-ELDPMIKK(7)	38	3.76e-08		√	√	8.62829
834	LON(49)-LON(1)	KIMLVAQK(1)-MNPER(1)	38	2.29e-07				n.a.
835	GLMM(314)-GLMM(305)	YVLEKMQEK(5)-AKVGDR(2)	38	4.37e-07				n.a.
836	RS1(1)-RS1(158)	MTESFAQLFEESLK(1)-VIKLDQK(3)	38	2.72e-06				n.a.
837	ACRA(78)-ACRA(175)	IAEVRPQVSGIILKR(14)-INLAYTKVTSPISGR(7)	37	5.7e-23		√	√	9.7332
838	GATR(217)-GATR(86)	VIAVLDSSKFNR(9)-FQLASAPKNR(8)	37	2.72e-21				n.a.
839	IMDH(72)-IMDH(411)	LAIALAQEGGIGFIHKNMSIER(16)-YFQSDNAADKLVPEGIEGR(10)	37	1.48e-20				n.a.
840	AHPC(80)-AHPC(171)	LGVDVYAVSTDTHFTHKAWHSSSETIAK(17)-WKEGEATLAPSLDLVGK(2)	37	1.43e-18				n.a.
841	HNS(83)-HNS(96)	EMLIADGIDPNELLNSLAAVKSGTK(21)-PAKYSYVDENGETK(3), EMLIADGIDPNELLNSLAAVKSGTK(21)-AQRPAKYSYVDENGETK(6)	37	2.6e-17				n.a.
842	PTHP(49)-PTHP(40)	SLFKLQTLGLTQGTVVTISAEGEDEQK(4)-GFTSEITVTSNGKSASAK(13)	37	2.07e-15		√	√	9.66862
843	GPMA(100)-GPMA(250)	HYGALQGLNKAETAEK(10)-AAAVANQGKAK(11)	37	2.13e-14				n.a.
844	MAO2(382)-MAO2(432)	AIAELAHAEQSEVVASAYGDQDLSFGPEYIIPKPFDPR(33)-TNLFMKPIFSQAR(6)	37	1.7e-09				n.a.
845	TYPA(337)-TYPA(59)	LNKELVHNVALR(3)-GITILAKNTAIK(7)	36	1.93e-18				n.a.
846	DBHB(53)-DBHB(67)	EGDDVALVGFGTFAVKER(16)-NPQTGKEITIAAAK(6)	36	3.06e-17				n.a.
847	CRP(27)-CRP(90)	YPSKSTLIHQGEK(4)-AKTACEVAEISYK(2)	36	2.88e-16		√	√	5.28905
848	OSMY(64)-OSMY(81)	VKAALVDHDNIK(2)-STDISVKTDQK(7)	36	4.53e-15				n.a.
849	KPYK2(115)-KPYK2(102)	VGIDYKGLPADVVPGDILLLDDGR(6)-FLLDANLGKGEGDKEK(9)	36	1.69e-13				n.a.
850	IF2(157)-IF2(173)	DKVSNQQDDMTK(2)-NAQAEKAR(6), EAAEKDKVSNQQDDMTK(7)-NAQAEKAR(6)	36	1.24e-09				n.a.
851	PANC(181)-PANC(199)	AKDGLALSSR(2)-KIAPGLYK(1)	36	2.07e-09		√	√	12.2089
852	KAD(13)-KAD(136)	IILLGAPGAGKGTQAQFIMEK(11)-VYHVKFNPPK(5)	36	7.36e-08		√	√	17.2931
853	LIPA(56)-LIPA(37)	IQGIKAAMR(5)-KPEWMK(1)	36	1.18e-07				n.a.
854	EFTU1(209)-EFTU1(5),EFTU2(209)-EFTU2(5)	AIDKPFLLPIEDVFSISGR(4)-EKFER(2)	36	0.000385		√		24.6942
855	GPMA(18)-GPMA(248)	HGESQWNKENR(8)-AAAVANQGKAK(9)	35	3.87e-23				n.a.
856	TRUB(130)-TRUB(135)	GDIEQIPSMYSALKYQGK(14)-KLYEYAR(1)	35	3.65e-17		√	√	4.58943
857	TDCE(620)-TDCE(166)	NAVPTQSILTITSNVVYGQKTGNTPDGR(20)-KSGVLTGLPDGYGR(1)	35	2.46e-16				n.a.
858	NUOCD(392)-NUOCD(385)	LASYEKAALQNTILK(6)-EFLDWMPKR(8)	35	4.22e-15				n.a.
859	MPPA(255)-MPPA(275)	VTFLPINQESAATKR(14)-NMYQKLLK(5)	35	1.78e-14		√	√	11.9925
860	DPS(10)-DPS(27)	SKATNLLYTR(2)-KATVELLNR(1)	35	3.47e-14		√	√	12.2053
861	YCAO(66)-YCAO(2)	KAALASALGEYFER(1)-TQTFIPGK(1)	35	2.05e-13		√	√	11.3018
862	HNS(121)-HNS(57)	KAMDEQGK(1)-KLQQYR(1)	35	7.49e-11				n.a.
863	OMPR(170)-OMPR(184)	EDEPMPLTSGEFAVLKALVSHPR(16)-DKLMNLAR(2), EMFREDEPMPLTSGEFAVLKALVSHPR(20)-DKLMNLAR(2)	35	2.09e-10		√	√	12.6337
864	SKP(67)-SKP(70)	METDLQAKMK(8)-KLQSMK(1)	35	7.4e-10		√	√	5.01065
865	IF2(141)-IF2(141),IF2(141)-IF2(149),IF2(149)-IF2(141),IF2(149)-IF2(149)	EAAEQAKR(7)-EAAEQAKR(7)	35	2.94e-08				n.a.
866	RELB(13)-RELB(2)	IDDELKAR(6)-GSINLR(1)	35	7.27e-07		√	√	7.10737
867	ODO2(2)-ODO2(300)	SSVDILVPDLPESVADATVATWHK(1)-IKELAVK(2)	35	1.6e-06				n.a.
868	YIFE(49)-YIFE(98)	HGYAFNELDLGKR(12)-FHTLSGGKPQVEGAEDYTDSDD(8), HGYAFNELDLGKREPVTEEEK(12)-FHTLSGGKPQVEGAEDYTDSDD(8)	34	3.44e-16				n.a.
869	EFG(686)-EFG(643)	ASYTMEFLKYDEAPSNVAQAVIEAR(9)-GMLKGQESEVTGVK(4)	34	3.94e-16		√	√	13.8283
870	SYA(74)-SYA(279)	AGGKHNDLENVGYTAR(4)-VTGATDLSNKSLR(10)	34	8.13e-15		√		24.3471
871	PURA(293)-PURA(125)	VGAGPFPTELFDETGEFLCKQGNEFGATTGR(20)-GAKAIGTTGR(3)	34	8.18e-11		√		25.5014
872	OSMY(143)-OSMY(125)	GYAGDTATTSEIKAK(13)-DAKEGSVK(3)	34	2.26e-09				n.a.
873	DAPD(263)-DAPD(259)	GKVGINELLR(2)-KVDAKTR(5), GKVGINELLR(2)-VDAKTR(4)	34	3.04e-08				n.a.
874	LON(113)-LON(1)	ISALSDNGEHFSAKAEYLESPTIDER(14)-MNPER(1)	34	1.45e-07				n.a.
875	TOP1(407)-TOP1(346)	QFVACQMTPAKYDSTTLTVGAGDFR(11)-KYLPESPNQYASK(1)	33	3.73e-28		√	√	11.4515
876	CSDE(2)-CSDE(42)	TNPQFAGHPFGTTVTAETLR(1)-QLIMLGKQLPALPDELK(7)	33	4.85e-28		√		30.8405
877	MUTS(45)-MUTS(57)	MGDFYELFYDDAKR(13)-ASQLLDISLTKR(11)	33	2.28e-22		√	√	10.4687
878	MURA(22)-MURA(48)	LQGEVTISGAKNAALPILFAALLAEEPVEIQNVPK(11)-LKDVDTSMK(2)	33	4.04e-12		√	√	9.65871
879	ACON2(588)-ACON2(722)	ILEIEGLPDLKVEQAFELTDASAER(11)-AAGKLLDAHK(4)	33	9.46e-10		√	√	21.4696
880	SYH(400)-SYH(370)	VAVVLGESEVANGTAVVKDLR(18)-LMTNHGGGNFKK(11)	33	5.42e-09		√	√	12.9144
881	SYGB(475)-SYGB(146)	GDKDPFALR(3)-LPIPKLMR(5)	33	3.65e-07				n.a.
882	TIG(279)-TIG(272)	ELKSAIR(3)-KNMER(1)	33	2.14e-06		√	√	10.4024
883	PNP(571)-PNP(571)	DVIGKGGSVIR(5)-DVIGKGGSVIR(5), IKDVIGKGGSVIR(7)-DVIGKGGSVIR(5)	33	3.27e-06				n.a.
884	AROG(48)-AROG(41)	ILKGNDDR(3)-KAIHK(1)	33	8.15e-06		√	√	9.99584
885	PCKA(288)-PCKA(390)	LIGDDEHGWDDDGVFNFEGGCYAKTIK(24)-LTADQTQYHFLSGFTAKLAGTER(17)	32	9.38e-24		√	√	13.7615
886	EFTS(267)-EFTS(52)	FEVGEGIEKVETDFAAEVAAMSK(9)-KAGNVAADGVIK(1)	32	2.31e-16		√	√	14.623
887	EFTU1(10)-EFTU1(264),EFTU2(10)-EFTU2(264)	TKPHVNVGTIGHVDHGK(2)-KLLDEGR(1)	32	2.11e-15		√	√	13.6725
888	STPA(66)-STPA(117)	ISTWLELMKADGINPEELLGNSSAAAPR(9)-TPKPIAQALAEGK(3)	32	1.41e-14				n.a.
889	UPP(203)-UPP(116)	AHPDVELYTASIDQGLNEHGYIIPGLGDAGDKIFGTK(32)-NEETLEPVPYFQKLVSNIDER(13)	32	3.32e-13		√	√	12.8372
890	TIG(29)-TIG(146)	VTITIAADSIETAVKSELVNVAK(15)-KQQATWK(1)	32	1.82e-12		√		79.8971
891	FUR(9)-FUR(14)	TDNNTALKK(8)-AGLKVTLPR(4)	32	1.84e-12		√	√	6.56143
892	GREA(116)-GREA(13)	IVGDDEADFKQNLISVNSPIAR(10)-GAEKLREELDFLK(4)	32	3.44e-11		√	√	17.4563
893	TIG(296)-TIG(342)	SQAIEGLVKANDIDVPAALIDSEIDVLR(9)-ELFEEQAKR(8)	32	6.34e-10		√	√	12.7243
894	KAD(145)-KAD(40)	VEGKDDVTGEELTTR(4)-AAVKSGSELGK(4)	32	4.61e-09		√	√	20.2107
895	MURD(421)-MURD(46)	VQPGDMVLLSPACASLDQFKNFEQR(20)-MTPPGLDKLPEAVER(8)	32	4.29e-07		√	√	15.2208
896	AHPC(151)-AHPC(171)	KIKAAQYVASHPGEVCPAK(1)-WKEGEATLAPSLDLVGK(2)	31	4.7e-32				n.a.
897	PYRH(166)-PYRH(198)	ATKVDGVFTADPAK(3)-ELKVMDLAAFTLAR(3), ATKVDGVFTADPAKDPTATMYEQLTYSEVLEK(3)-ELKVMDLAAFTLAR(3)	31	5.22e-22		√	√	13.1374
898	ARTI(77)-ARTI(96)	EIDATCTFSNQAFDSLIPSLKFR(21)-EKQVLFTTPYYDNSALFVGQQGK(2)	31	1.06e-20				n.a.
899	SYT(63)-SYT(33)	VNGELVDACDLIENDAQLSIITAKDEEGLEIIR(24)-HYDHAVSPMDVALDIGPGLAKACIAGR(21)	31	1.09e-20		√	√	12.7619
900	ISPH(101)-ISPH(193)	DLTVFDATCPLVTKVHMEVAR(14)-KDDICYATTNR(1)	31	2.86e-20		√	√	12.1399
901	CH60(51)-CH60(117)	SFGAPTITKDGVSVAR(9)-AVAAGMNPMDLKR(12)	31	1.04e-19		√	√	12.1671
902	RS1(226)-RS1(229)	NLTDYGAFVDLGGVDGLLHITDMAWKR(26)-VKHPSEIVNVGDEITVK(2)	31	1.57e-16				n.a.
903	KPYK1(317)-KPYK1(68)	AEAGDVANAILDGTDAVMLSGESAKGK(25)-TAAILLDTKGPEIR(9)	31	2.42e-16		√	√	16.6141
904	ALKH(176)-ALKH(24)	DYLALKSVLCIGGSWLVPADALEAGDYDR(6)-TSAESILTTGPVVPVIVVKK(19)	31	2.25e-14		√	√	19.0646
905	YIFE(15)-YIFE(2)	YFDNKHYPR(5)-AESFTTTNR(1)	31	5.32e-12				n.a.
906	CSPA(16)-CSPA(60)	WFNADKGFGFITPDDGSK(6)-VSFTIESGAKGPAAGNVTSL(10)	31	2.95e-11		√	√	16.6917
907	ARGR(45)-ARGR(6)	FSSQGEIVAALQEQGFDNINQSKVSR(23)-SSAKQEELVK(4)	31	1.44e-10		√	√	16.263
908	EFTS(125)-EFTS(24)	VALVAKIGENINIR(6)-TGAGMMDCKK(9)	31	7.62e-10		√	√	14.2689
909	YBIT(259)-YBIT(257)	KAQIAELQSFVSR(1)-LLADNAKK(7)	31	9.35e-10				n.a.
910	HEMN(216)-HEMN(176)	EIGFTSTNIDLIYGLPKQTPESFAFTLK(17)-LSMGVQDFNKEVQR(10)	31	1.5e-09		√	√	10.4176
911	RS20(16)-RS20(19)	AIQSEKAR(6)-KHNASR(1)	31	1.74e-08		√	√	4.59564
912	RPOB(163)-RPOB(203)	GKTHSSGK(2)-KLPATIILR(1), SPGVFFDSDKGKTHSSGK(12)-KLPATIILR(1)	31	3.62e-08		√	√	13.5109
913	ISCU(42)-ISCU(2)	NVGSFDNNDENVGSGMVGAPACGDVMKLQIK(27)-AYSEK(1)	31	3.35e-07		√		45.2049
914	PUR8(19)-PUR8(83)	YGDKVSALR(4)-IKTIER(2)	31	2.07e-06		√	√	15.4891
915	RNC(35)-RNC(1)	SASSKHNER(5)-MNPIVINR(1)	31	6.32e-06				n.a.
916	6PGD(75)-6PGD(260)	ILLMVKAGAGTDAAIDSLKPYLDK(6)-KDEDGNYLVDVILDEAANKGTGK(19)	30	1.31e-30		√	√	9.69642
917	SYK1(2)-SYK1(82)	SEQHAQGADAVVDLNNELK(1)-IMGKASFVTLQDVGGR(4)	30	5.85e-25				n.a.
918	CODA(403)-CODA(2)	GGKVIASTQPAQTTVYLEQPEAIDYK(3)-SNNALQTIINAR(1)	30	1.08e-23				n.a.
919	MANB(382)-MANB(15)	MAAFPASGEINSKLAQPVEAINR(13)-GKLGEELNEDIAWR(2)	30	3.19e-22				n.a.
920	SYK2(82)-SYK2(114)	IMGKASFVTLQDVGGR(4)-DSLPEGVYNDQFKK(13)	30	3.71e-22		√	√	9.93546
921	SUCC(295)-SUCC(360)	LHGGEPANFLDVGGGATKER(18)-KLADSGLNIIAAK(1)	30	7.22e-22		√	√	14.1648
922	TYPH(165)-TYPH(1)	DVGVAIIGQTSSLAPADKR(18)-MFLAQEIIR(1)	30	5.68e-21				n.a.
923	SYK1(114)-SYK1(82)	DDLPEGVYNEQFKK(13)-IMGKASFVTLQDVGGR(4)	30	8.39e-19		√	√	10.0571
924	TRPR(72)-TRPR(90)	ELKNELGAGIATITR(3)-GSNSLKAAPVELR(6)	30	8.13e-18		√	√	17.7845
925	EFTU1(38)-EFTU1(264),EFTU2(38)-EFTU2(264)	TTLTAAITTVLAKTYGGAAR(13)-KLLDEGR(1)	30	5.25e-16		√	√	12.6222
926	YEBC(119)-YEBC(215)	HAFSKCGGNLGTDGSVAYLFSK(5)-ADMDAETAPKLMR(10)	30	1.27e-15		√	√	9.96221
927	PANC(151)-PANC(181)	LFNLVQPDIACFGEKDFQQLALIR(15)-AKDGLALSSR(2)	30	2.26e-14		√	√	18.1928
928	ODP2(410)-ODP2(346)	IQKISGANLSR(3)-EFGVNLAKVK(8)	30	1.28e-12				n.a.
929	PDXH(145)-PDXH(72)	DSQIGAWVSKQSSR(10)-IVLLKHYDEK(5)	30	5.39e-12		√	√	21.5907
930	TIG(48)-TIG(146)	GKVPMNIVAQR(2)-KQQATWK(1)	30	3.91e-11		√		94.298
931	UPP(116)-UPP(148)	NEETLEPVPYFQKLVSNIDER(13)-KAGCSSIK(1)	30	8.15e-11		√	√	13.0555
932	MRP(116)-MRP(116)	NIIAVSSGKGGVGK(9)-NIIAVSSGKGGVGK(9)	30	1.3e-10				n.a.
933	HSLU(72)-HSLU(118)	LAKLANAPFIK(3)-VQAIEKNR(6)	30	1.63e-09		√	√	16.7321
934	IMDH(428)-IMDH(110)	LKEIIHQQMGGLR(2)-EVKELTER(3)	30	6.65e-08				n.a.
935	RPOC(585)-RPOC(531)	AILWMIVPKGLPYSIVNQALGK(9)-GEGMVLTGPKEAER(10)	30	9.79e-08		√	√	14.4829
936	SURA(405)-SURA(134)	KFSEEAASWMQEQR(1)-KEMIISEVR(1)	29	2.99e-20		√		24.8949
937	UDP(235)-UDP(2)	TQQEIPNAETMKQTESHAVK(12)-SKSDVFHLGLTK(1)	29	1.58e-18		√	√	9.89707
938	EFTS(10)-EFTS(52)	AEITASLVKELR(9)-KAGNVAADGVIK(1)	29	3.26e-18		√	√	13.2518
939	PNP(690)-PNP(661)	LSIKEATEQSQPAAAPEAPAAEQGE(4)-VEKVTDYLQMGQEVPVK(3)	29	7.53e-18		√	√	16.989
940	BCP(84)-BCP(77)	FAEKELLNFTLLSDEDHQVCEQFGVWGEK(4)-AGVDVLGISTDKPEKLSR(15)	29	6.04e-16				n.a.
941	RNR(13)-RNR(2)	EAEKYANPIPSR(4)-SQDPFQER(1)	29	2.98e-15				n.a.
942	SYS(77)-SYS(43)	LEVNKLGEELDAAK(5)-VLQVKTENLQAER(5)	29	3.73e-14				n.a.
943	FRSA(12)-FRSA(16)	TQANLSETLFKPR(11)-FKHPETSTLVR(2)	29	1.23e-12				n.a.
944	DGAL(269)-DGAL(323)	SSIPVFGVDALPEALALVKSGALAGTVLNDANNQAK(19)-VPYVGVDKDNLAEFSK(8)	29	1.82e-12		√	√	6.07122
945	GPMA(33)-GPMA(250)	FTGWYDVDLSEKGVSEAK(12)-AAAVANQGKAK(11)	29	5.92e-11				n.a.
946	PNP(571)-PNP(628)	DVIGKGGSVIR(5)-VYTGKVTR(5), IKDVIGKGGSVIR(7)-VYTGKVTR(5)	29	2.01e-10				n.a.
947	YDGH(247)-YDGH(234)	YTVTLPDGTKVEELNK(10)-FFETQSSKGGR(8)	29	3.53e-09				n.a.
948	RPOC(395)-RPOC(399)	GLATTIKAAK(7)-KMVER(1)	29	5.56e-09		√	√	6.14304
949	CISY(310)-CISY(295)	VYKNYDPR(3)-DKNDSFR(2)	29	1.4e-08		√	√	19.6108
950	HDEB(82)-HDEB(89)	GGDTVTLNETDLTQIPKVIEYCK(17)-KNPQK(1)	29	2.03e-08				n.a.
951	SYL(813)-SYL(707)	AKITVPVDATEEQVR(2)-DVHKTIAK(4)	29	5.07e-08		√	√	21.2304
952	FKBA(227)-FKBA(110)	LVIPPELAYGKAGVPGIPPNSTLVFDVELLDVKPAPK(11)-VKSSAQAK(2)	29	2.04e-07		√	√	17.0801
953	YDCH(13)-YDCH(1)	LKNENPR(2)-MFPEYR(1)	29	2.79e-06				n.a.
954	RNR(105)-RNR(544)	KDDLYLSSEQMK(1)-SMKQAIYDPENR(3)	28	8.02e-19				n.a.
955	HNS(83)-HNS(136)	EMLIADGIDPNELLNSLAAVKSGTK(21)-SLDDFLIKQ(8)	28	7.38e-16				n.a.
956	GLRX2(14)-GLRX2(46)	LYIYDHCPYCLKAR(12)-MVGQKQVPILQK(5)	28	4.18e-15		√	√	17.6689
957	G6PD(71)-G6PD(344)	EALETFMKETIDEGLWDTLSAR(8)-LPTKCSEVVVYFK(4)	28	8.24e-14				n.a.
958	YIHD(19)-YIHD(61)	LNEVIELLQPAWQKEPDLNLLQFLQK(14)-DSAKDAVIPGLQK(4)	28	9.51e-14				n.a.
959	AROG(25)-AROG(1)	ELLPPVALLEKFPATENAANTVAHAR(11)-MNYQNDDLR(1)	28	2.18e-13				n.a.
960	HTPG(99)-HTPG(45)	DEVIDHLGTIAKSGTK(12)-ELISNASDAADKLR(12)	28	5.79e-12		√	√	19.3754
961	ODP1(558)-ODP1(329)	EQVAYYKEDEK(7)-SKDGAYVR(2)	28	4.29e-11		√	√	18.9748
962	SYN(286)-SYN(294)	ADDMKFFAER(5)-VDKDAVSR(3)	28	1.63e-06				n.a.
963	DLDH(92)-DLDH(85)	EKVINQLTGGLAGMAK(2)-TDIDKIR(5)	28	4.16e-06		√	√	10.2292
964	LPLA(134)-LPLA(172)	KVSGSAYR(1)-KLAAK(1)	28	9.73e-06		√		23.3768
965	UPP(67)-UPP(70)	VTIEGWNGPVEIDQIKGK(16)-KITVVPILR(1)	27	2.75e-36		√	√	8.13582
966	PUR9(47)-PUR9(17)	LLAEKGLPVTEVSDYTGFPEMMDGR(5)-ALLSVSDKAGIVEFAQALSAR(8)	27	2.61e-31				n.a.
967	RL6(44)-RL6(6)	TLNDAVEVKHADNTLTFGPR(9)-VAKAPVVVPAGVDVK(3)	27	1.41e-20		√	√	9.81925
968	DHAS(232)-DHAS(104)	SGELPVDNFGVPLAGSLIPWIDKQLDNGQSR(23)-MKDDAIIILDPVNQDVITDGLNNGIR(2)	27	5.34e-17		√	√	18.7946
969	TIG(287)-TIG(37)	VKSQAIEGLVK(2)-SELVNVAKK(8)	27	3.04e-14		√		56.4612
970	IF3(164)-IF3(125)	VKDDLQELAVVESFPTKIEGR(17)-FLEEGDKAKITLR(9), VKDDLQELAVVESFPTKIEGR(17)-AKITLR(2)	27	7.19e-14		√	√	15.075
971	HEM3(64)-HEM3(55)	GLFVKELEVALLENR(5)-GDVILDTPLAKVGGK(11)	27	3.39e-13				n.a.
972	MDH(312)-MDH(134)	DIALGEEFVNK(11)-KAGVYDK(1)	27	3.1e-11		√	√	12.8125
973	AHPF(16)-AHPF(268)	AYLEKLTKPVELIATLDDSAK(5)-TEGQKLAGALK(5)	27	4.66e-10		√		64.5311
974	IMDH(72)-IMDH(396)	LAIALAQEGGIGFIHKNMSIER(16)-GMGSLGAMSKGSSDR(10)	27	4.94e-07				n.a.
975	SYV(317)-SYV(291)	ESAQVFDTKGNESDVYSSEIPAEFQK(9)-ITPAHDFNDYEVGKR(14)	26	1.29e-21				n.a.
976	HIS2(149)-HIS2(137)	IAQKVGEEGVETALAATVHDR(4)-SADPETSYTAKLYASGTK(11)	26	7.38e-21				n.a.
977	CRP(131)-CRP(90)	LQVTSEKVGNLAFLDVTGR(7)-AKTACEVAEISYK(2)	26	1.38e-17		√	√	19.7316
978	GYRB(433)-GYRB(406)	DPALSELYLVEGDSAGGSAKQGR(20)-GALDLAGLPGKLADCQER(11)	26	6.37e-17		√	√	11.7387
979	EFTS(24)-EFTS(2)	TGAGMMDCKK(9)-AEITASLVK(1)	26	7.39e-15		√	√	9.3066
980	RL1(141)-RL1(167)	GLMPNPKVGTVTPNVAEAVK(7)-NDKNGIIHTTIGK(3)	26	1.52e-14		√	√	11.2887
981	MURF(111)-MURF(311)	VVALTGSSGKTSVK(10)-AGLANLKAVPGR(7)	26	1.62e-12		√	√	15.5015
982	RNC(102)-RNC(1)	LGPGELKSGGFR(7)-MNPIVINR(1)	26	2.25e-11				n.a.
983	PGK(49)-PGK(84)	ASLPTIELALKQGAK(11)-DKLSNPVR(2)	26	7.38e-11		√	√	14.4509
984	GLNB(90)-GLNB(40)	IGDGKIFVFDVAR(5)-QKGHTELYR(2)	26	7.7e-10		√	√	16.4239
985	RNB(1)-RNB(52)	MFQDNPLLAQLK(1)-SYFIPPPQMKK(10)	26	1.17e-09				n.a.
986	NUSG(106)-NUSG(121)	VMGFIGGTSDRPAPISDKEVDAIMNR(18)-LQQVGDKPR(7), VMGFIGGTSDRPAPISDKEVDAIMNR(18)-LQQVGDKPRPK(7)	26	1.54e-09		√		26.7109
987	RPOC(96)-RPOC(9)	CGVEVTQTKVR(9)-FLKAQTK(3)	26	2.2e-09		√		29.5233
988	RS1(279)-RS1(347)	RYPEGTKLTGR(7)-ISLGLKQCK(6)	26	3.51e-07		√	√	10.993
989	GRPE(90)-GRPE(85)	FALEKFINELLPVIDSLDR(5)-AHKFALEK(3)	26	6.45e-07		√	√	8.88188
990	FKBA(127)-FKBA(134)	DAADNEAKGK(8)-EKFAK(2)	26	8.25e-07		√	√	10.7401
991	MENB(89)-MENB(273)	AFCSGGDQKVR(9)-NAFNQKR(6)	26	1.08e-06		√	√	11.7117
992	ARCA(178)-ARCA(188)	AMLHFCENPGKIQSR(11)-KMTGR(1)	26	3.25e-06				n.a.
993	THII(438)-THII(422)	VEGIDVVSLPFYKLSTK(13)-SIDEQEDKPLK(8)	26	3.82e-06				n.a.
994	ODP2(317)-ODP2(410)	AEGKSEFAENDAYVHATPLIR(4)-IQKISGANLSR(3)	25	4.42e-17				n.a.
995	SYV(898)-SYV(930)	EVAKIEGEISR(4)-EKLEGYAEAK(2)	25	1.04e-14				n.a.
996	SDHM(402)-SDHM(402)	NAIAAVKAVNAAR(7)-NAIAAVKAVNAAR(7)	25	1.67e-11				n.a.
997	SMTA(22)-SMTA(218)	NIYGTTKGQLR(7)-EKHQQR(2)	25	9.84e-10				n.a.
998	RCSB(72)-RCSB(154)	YGDGITLIKYIK(9)-LSPKESEVLR(4)	25	3.05e-09				n.a.
999	GLNH(109)-GLNH(248)	AIDFSDGYYKSGLLVMVK(10)-WFGTEPK(7)	25	1.37e-07		√	√	12.0282
1000	RPOC(953)-RPOC(992)	AAAESSIQVKNK(10)-TKESYK(2)	25	1.43e-07		√	√	8.45054
1001	GRCA(88)-GRCA(62)	ETLEDAVKHPEK(8)-EVPVEVKPEVR(7)	25	5.36e-07				n.a.
1002	SYS(115)-SYS(24)	DIALTIPNLPADEVPVGKDENDNVEVSR(18)-RGFKLDVDK(4), DIALTIPNLPADEVPVGKDENDNVEVSR(18)-GFKLDVDK(3)	25	2.16e-06				n.a.
1003	RPOA(304)-RPOA(297)	SLTEIKDVLASR(6)-TPNLGKK(6)	25	6.37e-06		√	√	10.1583
1004	RS1(158)-RS1(247)	VIKLDQK(3)-VLKFDR(3)	25	1.06e-05				n.a.
1005	RNE(106)-RNE(71)	EGQEVIVQIDKEER(11)-HGFLPLKEIAR(7)	24	6.49e-26		√	√	14.5727
1006	FUMA(426)-FUMA(2)	DHPIYYAGPAKTPEGYASGSLGPTTAGR(11)-SNKPFHYQAPFPLK(1), DHPIYYAGPAKTPEGYASGSLGPTTAGR(11)-SNKPFHYQAPFPLKK(1)	24	6.56e-20				n.a.
1007	SYR(126)-SYR(389)	QTIVVDYSAPNVAKEMHVGHLR(14)-AGGTVKLADLLDEALER(6)	24	7.17e-18		√	√	10.5947
1008	FABB(308)-FABB(127)	MAMHGVDTPIDYLNSHGTSTPVGDVKELAAIR(26)-GLKAVGPYVVTK(3)	24	7.94e-18		√		27.6266
1009	APT(39)-APT(2)	DVTSLLEDPKAYALSIDLLVER(10)-TATAQQLEYLK(1)	24	2.08e-17		√	√	17.523
1010	RPOC(1263)-RPOC(1340)	KATIVNAGSSDFLEGEQVEYSR(1)-VLTEAAVAGKR(10)	24	4.69e-16		√	√	16.891
1011	SYL(813)-SYL(711)	AKITVPVDATEEQVR(2)-TIAKVTDDIGR(4)	24	5.82e-16		√		23.7527
1012	OMPR(85)-OMPR(105)	SQSNPMPIIMVTAKGEEVDR(14)-IVGLEIGADDYIPKPFNPR(14)	24	8.73e-14				n.a.
1013	MIND(11)-MIND(94)	IIVVTSGKGGVGK(8)-DKDALTR(2)	24	3.64e-11		√	√	16.6389
1014	IHFA(66)-IHFA(57)	NPKTGEDIPITAR(3)-DKNQRPGR(2)	24	3.82e-11		√		23.8025
1015	RL9(57)-RL9(35)	AELEAKLAEVLAAANAR(6)-NFLVPQGKAVPATK(8), RAELEAKLAEVLAAANAR(7)-NFLVPQGKAVPATK(8)	24	4.95e-11		√	√	9.73225
1016	YFBU(55)-YFBU(1)	EFGELKEETCR(6)-MEMTNAQR(1), ELDREFGELKEETCR(10)-MEMTNAQR(1)	24	7.75e-11				n.a.
1017	KAD(157)-KAD(40)	KDDQEETVR(1)-AAVKSGSELGK(4)	24	4.7e-10		√	√	11.4129
1018	FPG(255)-FPG(240)	VCGTPIVATKHAQR(10)-KGEPCR(1)	24	5.85e-09		√	√	11.947
1019	AMPA(80)-AMPA(147)	ILLIGCGKER(8)-TNKSEPR(3)	24	2.5e-08		√	√	16.5642
1020	CSRA(55)-CSRA(1)	IQAEKSQQSSY(5)-MLILTR(1)	24	1.33e-07		√	√	13.5786
1021	TOP1(389)-TOP1(443)	DMEADAQKLYQLIWR(8)-KGDEDR(1)	24	1.8e-07		√		22.2574
1022	RSMC(197)-RSMC(220)	DGLDVGSQLLLSTLTPHTKGK(19)-HSPKIR(4)	24	1.35e-06		√	√	5.81026
1023	FKBA(76)-FKBA(69)	LDKDQLIAGVQDAFADK(3)-EQEKLGIK(4)	24	6.1e-05		√	√	15.7802
1024	OPDA(303)-OPDA(582)	MAENPQQVLDFLTDLAKR(17)-KLVAVVPSPSWGR(1)	23	3.36e-31				n.a.
1025	NAGC(51)-NAGC(1)	IQIAEQSQLAPASVTKITR(16)-MTPGGQAQIGNVDLVK(1)	23	4.4e-25				n.a.
1026	RL11(113)-RL11(72)	AQLQEIAQTKAADMTGADIEAMTR(10)-SFTFVTKTPPAAVLLK(7)	23	1.36e-23		√	√	7.60234
1027	SYI(205)-SYI(398)	SALAEAEVEYYDKTSPSIDVAFQAVDQDALK(13)-GALLHVEKMQHSYPCCWR(8)	23	2.2e-22				n.a.
1028	DPS(101)-DPS(27)	AVQLGGVALGTTQVINSKTPLK(18)-KATVELLNR(1)	23	1.52e-21		√	√	17.6118
1029	GYRB(447)-GYRB(455)	NQAILPLKGK(8)-ILNVEKAR(6)	23	2.46e-16				n.a.
1030	YRBA(45)-YRBA(68)	KQQTVYGPLMEYIADNR(1)-IHAVSIKAYTPAEWAR(7)	23	9.29e-15		√	√	7.40378
1031	IF2(404)-IF2(502)	APVVTIMGHVDHGKTSLLDYIR(14)-IDKPEADPDR(3)	23	9.44e-15				n.a.
1032	OPPA(399)-OPPA(410)	KLAIAASSLWK(1)-KNIGVNVK(1)	23	1.44e-14		√	√	16.6907
1033	MINC(35)-MINC(2)	VIHQALEDKIAQAPAFLK(9)-SNTPIELK(1)	23	3.28e-14				n.a.
1034	YHBJ(203)-YHBJ(194)	PMTGLDKPVAAFLDR(7)-FLPNPHWDPKLR(10)	23	1.15e-13				n.a.
1035	OPGG(107)-OPGG(104)	IKYSPDYFTFGDVQHDKDTVK(2)-INEVTATAVKR(10)	23	5.57e-12		√	√	8.84775
1036	YHHX(106)-YHHX(345)	NVLVEKPFTPTLAQAKELFALAK(16)-GFEQASPSTVTLAK(14)	23	7.23e-12		√	√	13.2839
1037	GLYA(354)-GLYA(331)	NSVPNDPKSPFVTSGIR(8)-NLTGKEADAALGR(5)	23	9.45e-12		√	√	10.2352
1038	RPOC(1340)-RPOC(1348)	VLTEAAVAGKR(10)-GLKENVIVGR(3)	23	1.38e-11		√	√	16.7537
1039	EFTS(222)-EFTS(10)	KFTGEVSLTGQPFVMEPSK(1)-AEITASLVKELR(9)	23	1.08e-10		√		30.7576
1040	RHO(367)-RHO(181)	KEELLTTQEELQK(1)-GLIVAPPKAGK(8)	23	1.68e-10		√	√	10.076
1041	CPDB(580)-CPDB(354)	SVLAAWIADESKR(12)-QFVSKPIGK(5)	23	9.26e-10				n.a.
1042	SLYA(95)-SLYA(73)	LTEKAEPLISEMEAVINK(4)-TLDQLEEKGLISR(8)	23	2.03e-09				n.a.
1043	SYM(466)-SYM(403)	YVDEQAPWVVAKQEGR(12)-NAGFINKR(7)	23	6.44e-09		√	√	13.4238
1044	RL16(127)-RL16(118)	LPIKTTFVTK(4)-EAFKLAAAK(4)	23	9.18e-09		√	√	8.74094
1045	IMDH(396)-IMDH(110)	GMGSLGAMSKGSSDR(10)-EVKELTER(3)	23	1.71e-08				n.a.
1046	EFTS(281)-EFTS(10)	VETDFAAEVAAMSKQS(14)-AEITASLVKELR(9)	23	1.81e-08		√		37.0882
1047	YAJQ(108)-YAJQ(115)	QGIESATQKK(9)-MIKDSK(3)	23	3.37e-08				n.a.
1048	RPOA(1)-RPOA(297)	MQGSVTEFLKPR(1)-TPNLGKK(6)	23	1.12e-07		√		54.8911
1049	GLNB(40)-GLNB(9)	QKGHTELYR(2)-IDAIIKPFK(6)	23	5.88e-07		√	√	12.9869
1050	CISY(356)-CISY(310)	DDLLEVAMELENIALNDPYFIEKK(23)-VYKNYDPR(3)	23	4.81e-06		√	√	9.96419
1051	ACCD(240)-ACCD(2)	EKLPPGFQR(2)-SWIER(1)	23	2.29e-05				n.a.
1052	TALB(25)-TALB(50)	QYTTVVADTGDIAAMKLYQPQDATTNPSLILNAAQIPEYR(16)-KLIDDAVAWAK(1)	22	4.14e-23		√	√	19.0724
1053	PYRG(233)-PYRG(262)	IALFCNVPEKAVISLK(10)-SQGLDDYICKR(10)	22	1.39e-18		√	√	12.1035
1054	PROQ(75)-PROQ(107)	YLYGVKPGATR(6)-QLEEAKAR(6)	22	2.35e-14				n.a.
1055	RLUD(37)-RLUD(56)	IKEWILDQR(2)-VCDKPKEK(6)	22	9.34e-14		√	√	9.2422
1056	GLRX2(126)-GLRX2(46)	KEASAGNFADLLAHSDGLIK(1)-MVGQKQVPILQK(5)	22	2.88e-13		√	√	15.4676
1057	RF3(488)-RF3(480)	KNESQLALDGGDNLAYIATSMVNLR(1)-WVECADAKK(8)	22	3.91e-13		√	√	12.4218
1058	SYT(200)-SYT(241)	LMKTAGAYWR(3)-LEEAAKR(6)	22	3.73e-12		√	√	19.177
1059	RHO(385)-RHO(417)	KIIHPMGEIDAMEFLINK(1)-TNDDFFEMMKR(10)	22	8.09e-12		√	√	13.6457
1060	SODM(187)-SODM(114)	RPDYIKEFWNVVNWDEAAAR(6)-DFGSVDNFKAEFEK(9)	22	1.64e-11		√	√	9.03761
1061	RAIA(102)-RAIA(2)	AATSVKDANFVEEVEEE(6)-TMNITSK(1)	22	6.7e-11		√		42.1986
1062	MDH(217)-MDH(82)	IQNAGTEVVEAKAGGGSATLSMGQAAAR(12)-KPGMDR(1)	22	1.69e-10		√	√	8.92768
1063	EFTS(52)-EFTS(48)	KAGNVAADGVIK(1)-KSGAIKAAK(6), KAGNVAADGVIK(1)-SGAIKAAK(5)	22	5.45e-10		√	√	5.94439
1064	GCH1(86)-GCH1(137)	MYVDEIFSGLDYANFPKITLIENK(17)-DSVIGLSKINR(8)	22	8.16e-10		√	√	7.55373
1065	GYRB(592)-GYRB(603)	LVSEYNATQKMINR(10)-YPKAMLK(3)	22	1.42e-09				n.a.
1066	HNS(128)-HNS(57)	AMDEQGKSLDDFLIK(7)-KLQQYR(1)	22	3.01e-09				n.a.
1067	RLUC(197)-RLUC(214)	SVQAPLLKNILQSGER(8)-VSQEGKPSETR(6)	22	4.75e-09		√	√	8.72704
1068	NUOF(316)-NUOF(243)	AWQPGGAGTDFLTEAHLDLPMEFESIGKAGSR(28)-SKDAGTK(2)	22	7.87e-09				n.a.
1069	EFTS(222)-EFTS(214)	KFTGEVSLTGQPFVMEPSK(1)-EIAEKMVEGR(5)	22	0.000159		√	√	12.1425
1070	G6PI(1)-G6PI(80)	MKNINPTQTAAWQALQK(1)-ECDLAGAIKSMFSGEK(9)	21	6.84e-21		√	√	8.76426
1071	EFTS(125)-EFTS(10)	VALVAKIGENINIR(6)-AEITASLVKELR(9)	21	1.05e-19		√	√	13.6304
1072	MSRB(82)-MSRB(2)	YIKDLSHGMQR(3)-ANKPSAEELKK(1)	21	1.74e-16				n.a.
1073	PTA(208)-PTA(419)	VNNVDPAKLQESSPLPVLGAVPWSFDLIATR(8)-TVKAAAICAER(3)	21	2.35e-16				n.a.
1074	EFG(389)-EFG(555)	AGDIAAAIGLKDVTTGDTLCDPDAPIILER(11)-GGVIPGEYIPAVDKGIQEQLK(14)	21	1.56e-14		√		47.3145
1075	MALE(228)-MALE(163)	NKHMNADTDYSIAEAAFNK(2)-TWEEIPALDKELK(10)	21	2.54e-13		√	√	8.34417
1076	EFG(39)-EFG(370)	ILFYTGVNHKIGEVHDGAATMDWMEQEQER(10)-IVQMHANKR(8)	21	5.04e-11		√	√	11.8321
1077	BIOH(121)-BIOH(213)	DEWPGIKPDVLAGFQQQLSDDFQR(7)-KVVPMLDK(1)	21	5.53e-11				n.a.
1078	PGM(516)-PGM(273)	PSGTEDAYKIYCESFLGEEHRK(9)-FMHLDKDGAIR(6)	21	4.2e-10				n.a.
1079	MUKB(870)-MUKB(870)	IQFEQAKEGVTALNR(7)-IQFEQAKEGVTALNR(7)	21	2.02e-09				n.a.
1080	RPOD(462)-RPOD(493)	IPVHMIETINKLNR(11)-MLMPEDKIR(7)	21	6.63e-09		√	√	12.2247
1081	RPOA(1)-RPOA(298)	MQGSVTEFLKPR(1)-KSLTEIK(1)	21	1.89e-07		√		57.1334
1082	TRXB(321)-TRXB(185)	YLDGLADAK(9)-AEKILIK(3)	21	5e-07		√	√	19.013
1083	RS9(2)-RS9(13)	AENQYYGTGR(1)-KSSAAR(1)	21	1.13e-06		√		24.1931
1084	HNS(57)-HNS(57)	KLQQYR(1)-KLQQYR(1), TRKLQQYR(3)-KLQQYR(1)	21	1.92e-06				n.a.
1085	EFTU1(57)-EFTU1(57),EFTU2(57)-EFTU2(57)	AFDQIDNAPEEKAR(12)-AFDQIDNAPEEKAR(12)	21	5.01e-06		√	√	0
1086	MAO2(419)-MAO2(59)	PIADFDVYIDKLTEFVYK(11)-AYKYTAR(3), AAMESGVATRPIADFDVYIDKLTEFVYK(21)-AYKYTAR(3)	21	3.07e-05				n.a.
1087	PROB(145)-PROB(72)	ALLDNNIVPVINENDAVATAEIKVGDNDNLSALAAILAGADK(23)-EHLGYPELPATIASKQLLAAVGQSR(15)	20	1.44e-26				n.a.
1088	ASPG2(310)-ASPG2(284)	VPTGATTQDAEVDDAKYGFVASGTLNPQK(16)-SVFDTLATAAKTGTAVVR(11)	20	1.85e-24		√	√	9.15498
1089	PANC(1)-PANC(86)	MLIIETLPLLR(1)-KVDLVFAPSVK(1)	20	7.74e-22		√	√	6.6693
1090	NUSB(67)-NUSB(82)	ELLAGVATNTAYLDGLMKPYLSR(18)-LLEELGQVEKAVLR(10)	20	1.02e-19		√	√	10.7067
1091	KAD(57)-KAD(157)	DIMDAGKLVTDELVIALVK(7)-KDDQEETVR(1)	20	2.24e-16		√	√	12.4727
1092	PDXK(229)-PDXK(2)	TDLKGTGDLFCAQLISGLLK(4)-SSLLLFNDK(1)	20	2.61e-16		√		27.4964
1093	RPOC(983)-RPOC(996)	NTELKLIDEFGR(5)-ESYKVPYGAVLAK(4)	20	3.82e-16		√	√	8.47738
1094	FRMA(361)-FRMA(222)	GDIDLEPFVTHTMSLDEINDAFDLMHEGKSIR(29)-IIAIDTNPKK(9)	20	9.21e-15				n.a.
1095	EFTU1(249)-EFTU1(264),EFTU2(249)-EFTU2(264)	VGEEVEIVGIKETQK(11)-KLLDEGR(1)	20	2.14e-14		√	√	18.2139
1096	RRF(21)-RRF(170)	CVEAFKTQISK(6)-KIEAALADK(1)	20	7.11e-14		√	√	9.09112
1097	IPYR(116)-IPYR(143)	LSKEYDHIKDVNDLPELLK(3)-AQIAHFFEHYKDLEKGK(11), LSKEYDHIK(3)-AQIAHFFEHYKDLEKGK(11)	20	1.18e-13		√	√	13.6906
1098	KDSA(259)-KDSA(284)	CDGPSALPLAKLEPFLK(11)-GFEELDTSK(9)	20	2.53e-12		√		41.6883
1099	RPIA(121)-RPIA(7)	FICIADASKQVDILGK(9)-MTQDELKK(7)	20	3.59e-12		√	√	11.012
1100	FKBB(86)-FKBB(94)	FQAMAAEGVKYLEENAK(10)-KEGVNSTESGLQFR(1)	20	7.4e-12				n.a.
1101	GLRX3(2)-GLRX3(83)	ANVEIYTK(1)-GGLDPLLK(8)	20	2.11e-11		√	√	0.406075
1102	RPOB(1127)-RPOB(1140)	GIGDKINAMLK(5)-QQQEVAKLR(7)	20	6.2e-11		√	√	9.62013
1103	FKBA(179)-FKBA(65)	GTLIDGKEFDNSYTR(7)-YMENSLKEQEK(7)	20	8.91e-11		√		22.1378
1104	CISY(356)-CISY(293)	DDLLEVAMELENIALNDPYFIEKK(23)-AKDKNDSFR(2), ELGTKDDLLEVAMELENIALNDPYFIEKK(28)-AKDKNDSFR(2)	20	3.82e-10		√	√	14.4248
1105	PDXK(138)-PDXK(2)	KDHPDLLIMVDPVIGDIDSGIYVKPDLPEAYR(24)-SSLLLFNDK(1), DHPDLLIMVDPVIGDIDSGIYVKPDLPEAYR(23)-SSLLLFNDK(1)	20	1.73e-09		√		39.5107
1106	PTGA(148)-PTGA(2)	STLTPVVISNMDEIKELIK(15)-GLFDK(1)	20	7.09e-09		√		43.8914
1107	RIR1(154)-RIR1(645)	QLEGKYLVQNR(5)-GYVSIKASK(6)	20	1.09e-08		√	√	14.3824
1108	RPOB(1242)-RPOB(1073)	LNHLVDDKMHAR(8)-HGNKGVISK(4)	20	5.08e-08		√	√	16.8515
1109	RL7(71)-RL7(71)	VAVIKAVR(5)-VAVIKAVR(5)	20	2.07e-07		√	√	0
1110	EFTU1(314)-EFTU1(300),EFTU2(314)-EFTU2(300)	FESEVYILSKDEGGR(10)-PGTIKPHTK(5)	20	2.47e-07		√		34.788
1111	EFTU1(391)-EFTU1(300)	TVGAGVVAKVLG(9)-PGTIKPHTK(5)	20	3.5e-06		√	√	10.8658
1112	PNP(263)-PNP(1)	ITDKQER(4)-MLNPIVR(1)	20	8.42e-06		√	√	15.2803
1113	RPOC(66)-RPOC(50)	IFGPVKDYECLCGK(6)-TFKPER(3)	20	0.000258		√	√	7.66669
1114	SYK1(2)-SYK1(132)	SEQHAQGADAVVDLNNELK(1)-TKTGELSIHCTELR(2)	19	2.39e-37				n.a.
1115	APT(39)-APT(1)	DVTSLLEDPKAYALSIDLLVER(10)-MTATAQQLEYLK(1)	19	1.6e-25				n.a.
1116	TIG(29)-TIG(46)	VTITIAADSIETAVKSELVNVAK(15)-KGKVPMNIVAQR(1)	19	2.92e-25		√	√	17.0393
1117	DBHA(22)-DBHA(3)	TQAKAALESTLAAITESLK(4)-MNKTQLIDVIAEK(3)	19	9.53e-25		√	√	8.6822
1118	SYK1(156)-SYK1(2)	ALRPLPDKFHGLQDQEAR(8)-SEQHAQGADAVVDLNNELK(1)	19	4.72e-22				n.a.
1119	STPA(57)-STPA(2)	QEKISTWLELMK(3)-SVMLQSLNNIR(1)	19	7.36e-20				n.a.
1120	EFTU1(209)-EFTU1(10),EFTU2(209)-EFTU2(10)	AIDKPFLLPIEDVFSISGR(4)-TKPHVNVGTIGHVDHGK(2)	19	1.28e-15		√	√	9.74844
1121	RF2(307)-RF2(302)	NAEKQAMEDNK(4)-LYELEMQKK(8)	19	1.42e-15		√	√	8.74875
1122	GLMM(147)-GLMM(49)	EISCVDSAELGKASR(12)-IIIGKDTR(5)	19	6.52e-14				n.a.
1123	EFTS(10)-EFTS(214)	AEITASLVKELR(9)-EIAEKMVEGR(5)	19	2.65e-13		√		32.5766
1124	EFPL(23)-EFPL(9)	LLLVKDIDIQSPTAR(5)-KGMVLNYNGK(1)	19	7.43e-13				n.a.
1125	HNS(83)-HNS(120)	EMLIADGIDPNELLNSLAAVKSGTK(21)-TPAVIKK(6)	19	3.45e-12				n.a.
1126	RDGC(108)-RDGC(81)	DSLKDEVLHSLLPR(4)-ILPSPVIKQALEAK(8)	19	2.13e-11		√	√	8.9547
1127	HEM3(158)-HEM3(55)	LSKLDNGEYDAIILAVAGLK(3)-GDVILDTPLAKVGGK(11)	19	5.21e-11				n.a.
1128	ACON2(35)-ACON2(77)	PLDANQMAALVELLKNPPAGEEEFLLDLLTNR(15)-GEAKSPLLTPEK(4)	19	1.89e-10		√	√	6.34273
1129	YBIS(115)-YBIS(141)	LYYYPKGTNTVIVLPIGIGQLGK(6)-DTPINWTTKVER(9)	19	1.13e-08				n.a.
1130	PFLA(196)-PFLA(243)	DMGNVEKIELLPYHELGK(7)-GILEQYGHKVMF(9)	19	1.67e-08		√	√	4.75621
1131	RPOB(900)-RPOB(909)	GETQLTPEEKLLR(10)-AIFGEKASDVK(6)	19	3.92e-08		√	√	9.1054
1132	PTA(198)-PTA(317)	TRPDLSEIFDDSSKAK(14)-ISKLCER(3)	19	4.03e-07				n.a.
1133	HSLU(63)-HSLU(24)	NILMIGPTGVGKTEIAR(12)-HIIGQDNAKR(9)	19	5.24e-07		√	√	8.84532
1134	RPOA(1)-RPOA(145)	MQGSVTEFLKPR(1)-IKVQR(2)	19	3.24e-06		√	√	20.4582
1135	PEPB(184)-PEPB(242)	SPVLLALDYNPTGDKEAPVYACLVGK(15)-VKLFLCCADNLISGNAFK(2)	18	2.01e-32				n.a.
1136	FABZ(58)-FABZ(84)	NVSVNEPFFQGHFPGKPIFPGVLILEAMAQATGILAFK(16)-SVGKLEPGELYYFAGIDEAR(4)	18	5.49e-26				n.a.
1137	DNAK(183)-DNAK(502)	IINEPTAAALAYGLDKGTGNR(16)-ITIKASSGLNEDEIQK(4)	18	3.79e-20		√		25.5911
1138	GSTA(169)-GSTA(201)	WAYAVKLNLEGLEHIAAFMQR(6)-MAERPEVQDALSAEGLK(17)	18	4.2e-20		√	√	15.515
1139	ODP2(313)-ODP2(410)	AEAPAAAPAAKAEGK(11)-IQKISGANLSR(3)	18	1.39e-18				n.a.
1140	YIFE(30)-YIFE(2)	HGDFTIKEAQLLER(7)-AESFTTTNR(1)	18	1.96e-17				n.a.
1141	RCSB(215)-RCSB(154)	LGVENDIALLNYLSSVTLSPADKD(23)-LSPKESEVLR(4)	18	1.53e-16				n.a.
1142	RSXC(602)-RSXC(602)	KLEQQQANAEPEEQVDPR(1)-KLEQQQANAEPEEQVDPR(1)	18	2.16e-14				n.a.
1143	HSCB(109)-HSCB(167)	EELDEIEQAKDEAR(10)-SSAEQLEEKLLDF(9)	18	1.26e-12		√	√	9.77202
1144	HSLU(240)-HSLU(109)	LVNPEELKQDAIDAVEQHGIVFIDEIDK(8)-DLTDAAVKMVR(8)	18	7.57e-12		√	√	9.4642
1145	TKT1(340)-TKT1(347)	GEMPSDFDAKAK(10)-EFIAKLQANPAK(5), MKGEMPSDFDAKAK(12)-EFIAKLQANPAK(5)	18	8.01e-12		√	√	10.5681
1146	ODP1(393)-ODP1(411)	ATVILAHTIKGYGMGDAAEGK(10)-NIAHQVKK(7)	18	9.22e-12		√	√	13.7571
1147	RL9(35)-RL9(42)	NFLVPQGKAVPATK(8)-KNIEFFEAR(1)	18	2.46e-11		√	√	13.1032
1148	ENO(92)-ENO(325)	DQAGIDKIMIDLDGTENK(7)-IQLVGDDLFVTNTKILK(14)	18	3.11e-11		√	√	16.7218
1149	HNS(6)-HNS(120)	SEALKILNNIR(5)-TPAVIKK(6)	18	1.46e-10				n.a.
1150	MENB(1)-MENB(89)	MIYPDEAMLYAPVEWHDCSEGFEDIR(1)-AFCSGGDQKVR(9)	18	2.03e-10		√	√	14.2415
1151	SYK2(114)-SYK2(2)	DSLPEGVYNDQFKK(13)-SEQETR(1)	18	4.81e-10				n.a.
1152	YQIC(6)-YQIC(1)	KIEQIAR(1)-MIDPK(1)	18	6.78e-10				n.a.
1153	MNMG(561)-MNMG(88)	QQDEIEKQLR(7)-ILNASKGPAVR(6)	18	2.7e-09				n.a.
1154	IF2(157)-IF2(141),IF2(157)-IF2(149)	EAAEKDKVSNQQDDMTK(7)-EAAEQAKR(7), DKVSNQQDDMTK(2)-EAAEQAKR(7)	18	2e-08				n.a.
1155	YECJ(75)-YECJ(40)	AIALIELKFTPQGESH(8)-EKMSSQLK(2)	18	4.53e-08				n.a.
1156	YEGQ(83)-YEGQ(76)	DLKPVVEMGPDALIMSDPGLIMLVR(3)-LKTFIR(2)	18	7.54e-08				n.a.
1157	MAZG(126)-MAZG(119)	AQKAQHSALDDIPR(3)-WEQIKTEER(5)	18	1.73e-07		√	√	13.1945
1158	SYT(122)-SYT(577)	TLTQEDVEALEKR(12)-NEKIGFK(3)	18	1.75e-07		√		52.3097
1159	YFIF(63)-YFIF(55)	KWEDSPWR(1)-DDKQSQPR(3), DRKWEDSPWR(3)-DDKQSQPR(3)	18	2.12e-07				n.a.
1160	KBL(362)-KBL(23)	EGIYVTGFFYPVVPKGQAR(15)-AEGLFKEER(6)	18	6.32e-07		√	√	14.402
1161	HNS(136)-HNS(2)	SLDDFLIKQ(8)-SEALK(1)	18	3.65e-06				n.a.
1162	RATB(52)-RATB(92)	NKVGIYSR(2)-AEKSANK(3)	18	6.67e-06				n.a.
1163	HTPG(271)-HTPG(354)	VEGKQEYTSLLYIPSQAPWDMWNR(4)-NALTKR(5)	18	1.77e-05		√	√	16.1136
1164	RRF(138)-RRF(1)	RDANDKVK(6)-MISDIR(1), DANDKVK(5)-MISDIR(1)	18	2.53e-05		√	√	9.12817
1165	HNS(32)-HNS(2)	ECTLETLEEMLEKLEVVVNER(13)-SEALK(1)	18	5.32e-05		√	√	15.5547
1166	SYI(5)-SYI(900)	SDYKSTLNLPETGFPMR(4)-AEGEKCPR(5)	18	0.000488				n.a.
1167	ACON2(588)-ACON2(835)	ILEIEGLPDLKVEQAFELTDASAER(11)-LPTPEEYQTYVAQVDKTAVDTYR(16)	17	3.12e-27		√	√	20.3795
1168	MANB(308)-MANB(320)	LSWNTVDVVTAAGGTPVMSKTGHAFIK(20)-KEDAIYGGEMSAHHYFR(1)	17	5.05e-21				n.a.
1169	SRP54(249)-SRP54(278)	AFNEALPLTGVVLTKVDGDAR(15)-FLGVGEKTEALEPFHPDR(7)	17	7.33e-21		√	√	11.0336
1170	YQGE(159)-YQGE(70)	GQLEQEILDNAWLTAPADLNILFKTPIADR(24)-LDKPVMLGGPLAEDR(3)	17	1.03e-20				n.a.
1171	GLMS(265)-GLMS(2)	EIYEQPNAIKNTLTGR(10)-CGIVGAIAQR(1)	17	6.36e-19		√		29.9262
1172	GLMS(453)-GLMS(2)	IEQMLSQDKR(9)-CGIVGAIAQR(1)	17	7.94e-19		√		35.6461
1173	EFTS(247)-EFTS(159)	TVGQLLKEHNAEVTGFIR(7)-IGVLVAAKGADEELVK(8)	17	3.58e-18		√	√	10.8953
1174	EFTU1(177)-EFTU1(264),EFTU2(177)-EFTU2(264)	GSALKALEGDAEWEAK(5)-KLLDEGR(1)	17	2.54e-15		√		22.884
1175	PTA(115)-PTA(200)	KHQFAQSLNYEIAK(1)-AKVNNVDPAK(2)	17	7.6e-15				n.a.
1176	DBHA(83)-DBHA(1)	IAAANVPAFVSGKALK(13)-MNKTQLIDVIAEK(1)	17	3.37e-13				n.a.
1177	RL7(82)-RL7(71)	GATGLGLKEAK(8)-VAVIKAVR(5)	17	1.71e-11		√	√	10.4958
1178	NRDR(65)-NRDR(53)	EPFNEEKLR(7)-VVKSNDVR(3)	17	1.2e-10				n.a.
1179	ODO2(90)-ODO2(300)	ETSAKSEEK(5)-IKELAVK(2)	17	1.89e-10				n.a.
1180	RLMG(116)-RLMG(143)	VPKTLALLEQQLR(3)-IIAGAKAR(6)	17	2.22e-10		√	√	10.8827
1181	SYM(466)-SYM(529)	YVDEQAPWVVAKQEGR(12)-VNPFKALYNR(5)	17	3.19e-10		√		23.7286
1182	TRER(18)-TRER(8)	LSGVGKSTVSR(6)-LTIKDIAR(4)	17	7.18e-10				n.a.
1183	HSLU(109)-HSLU(2)	DLTDAAVKMVR(8)-SEMTPR(1)	17	1.78e-09		√	√	19.6394
1184	SDHM(402)-SDHM(438)	NAIAAVKAVNAAR(7)-DMNAKYR(5)	17	2.33e-09				n.a.
1185	OSMY(158)-OSMY(143)	HVKVETTDGVVQLSGTVDSQAQSDR(3)-GYAGDTATTSEIKAK(13)	17	2.43e-09				n.a.
1186	DBHB(18)-DBHB(1)	IAAGADISKAAAGR(9)-MNKSQLIDK(1)	17	8.94e-08		√	√	15.8855
1187	ACCC(442)-ACCC(449)	IMNDENFQHGGTNIHYLEKK(19)-LGLQEK(6)	17	8.94e-08		√	√	13.0885
1188	UPP(70)-UPP(26)	KITVVPILR(1)-EQDISTKR(7)	17	1.25e-07		√	√	12.4078
1189	RS10(82)-RS10(1)	LVDIVEPTEKTVDALMR(10)-MQNQR(1)	17	1.29e-07		√	√	11.9643
1190	EFG(23)-EFG(143)	NIGISAHIDAGKTTTTER(12)-IAFVNKMDR(6)	17	2.14e-07		√	√	10.2934
1191	YICC(61)-YICC(61)	GKVECTLR(2)-GKVECTLR(2)	17	8.74e-07				n.a.
1192	CH60(277)-CH60(226)	VAAVKAPGFGDR(5)-KISNIR(1)	17	9.64e-07		√	√	7.76463
1193	SYL(152)-SYL(289)	KTSAVNWCPNDQTVLANEQVIDGCCWR(1)-NTKVAEAEMATMEK(3)	16	1.27e-25		√	√	18.7137
1194	FABZ(119)-FABZ(84)	RPVVPGDQMIMEVTFEKTR(17)-SVGKLEPGELYYFAGIDEAR(4), PVVPGDQMIMEVTFEKTR(16)-SVGKLEPGELYYFAGIDEAR(4)	16	1.1e-22				n.a.
1195	UXUA(124)-UXUA(363)	TDLEYVLPDGSKALR(12)-KTNPGYSAIGR(1)	16	2.61e-18		√	√	11.9945
1196	RSXC(602)-RSXC(588),RSXC(602)-RSXC(620),RSXC(602)-RSXC(652),RSXC(602)-RSXC(684)	KLEQQQANAEPEEQVDPR(1)-KAAVEAAIAR(1)	16	6.99e-18				n.a.
1197	BIRA(172)-BIRA(183)	VKWPNDLYLQDR(2)-KLAGILVELTGK(1)	16	1.59e-17		√	√	8.88477
1198	TOP1(19)-TOP1(144)	TINKYLGSDYVVK(4)-VVFNEITKNAIR(8)	16	8.07e-16		√	√	7.78732
1199	CLPB(476)-CLPB(530)	ASLSGTQTIKAELEQAK(10)-NKVTDAEIAEVLAR(2)	16	8.58e-15		√	√	7.84527
1200	GLNB(58)-GLNB(40)	GAEYMVDFLPKVK(11)-QKGHTELYR(2)	16	1.3e-14		√	√	14.4758
1201	ODP1(724)-ODP1(866)	LETIEGSKGK(8)-KVVADAIAK(1)	16	1.18e-13		√	√	14.9626
1202	PTA(360)-PTA(255)	IEKVQEYVANYINADWIESLTATSER(3)-VKSVTFCAR(2)	16	1.96e-13				n.a.
1203	DBHA(83)-DBHA(3)	IAAANVPAFVSGKALK(13)-MNKTQLIDVIAEK(3)	16	7.11e-13				n.a.
1204	GLMS(246)-GLMS(453)	QDIESNLQYDAGDKGIYR(14)-IEQMLSQDKR(9)	16	2.49e-12		√	√	19.6109
1205	RF2(362)-RF2(30)	NTQAVLDGSLDQFIEASLKAGL(19)-GYLDYDAKK(8)	16	3.86e-12		√	√	18.4883
1206	OSMY(118)-OSMY(81)	GVEGVTSVSDKLHVR(11)-STDISVKTDQK(7)	16	7.21e-12				n.a.
1207	AHPC(171)-AHPC(186)	WKEGEATLAPSLDLVGK(2)-EGEATLAPSLDLVGKI(15)	16	1.07e-10				n.a.
1208	KAD(13)-KAD(40)	IILLGAPGAGKGTQAQFIMEK(11)-AAVKSGSELGK(4)	16	4.22e-10		√	√	21.2944
1209	TALB(193)-TALB(187)	KEYAPAEDPGVVSVSEIYQYYK(1)-ILDWYKANTDK(6)	16	9.81e-10		√	√	4.64301
1210	APT(2)-APT(53)	TATAQQLEYLK(1)-YKNAGITK(2)	16	4.56e-09		√	√	11.6891
1211	GLPX(164)-GLPX(239)	NVAAALGKPLSELTVTILAKPR(20)-HDVKGDNEENRR(4), PLSELTVTILAKPR(12)-HDVKGDNEENRR(4)	16	2.21e-08				n.a.
1212	MAO2(52)-MAO2(1)	DLALAYSPGVAAPCLEIEKDPLK(19)-MDDQLK(1)	16	2.25e-08				n.a.
1213	LON(720)-LON(550)	GQVLPIGGLKEK(10)-EISKLCR(4)	16	1.03e-07				n.a.
1214	EFTS(281)-EFTS(24)	VETDFAAEVAAMSKQS(14)-TGAGMMDCKK(9)	16	1.76e-07		√		32.676
1215	RLMI(9)-RLMI(13)	LVLAKGR(5)-EKSLLR(2)	16	1.1e-06		√	√	9.6841
1216	SYM(466)-SYM(466)	YVDEQAPWVVAKQEGR(12)-YVDEQAPWVVAKQEGR(12)	16	1.19e-06		√	√	0
1217	CLPX(192)-CLPX(192)	KSDNPSITR(1)-KSDNPSITR(1)	16	1.95e-06				n.a.
1218	ODO2(133)-ODO2(152)	LLAEHNLDASAIKGTGVGGR(13)-HLAKAPAK(4)	16	4.91e-06		√	√	13.3685
1219	MOAC(135)-MOAC(147)	AVQKDMVIGPVR(4)-LLAKSGGK(4)	16	7.37e-06				n.a.
1220	SKP(75)-SKP(75)	LQSMKAGSDR(5)-LQSMKAGSDR(5)	16	2.15e-05		√	√	0
1221	EFG(159)-EFG(675)	VVNQIKTR(6)-SLTKGR(4)	16	4.71e-05		√	√	19.4102
1222	PT1(238)-PT1(1)	NDDYLILDAVNNQVYVNPTNEVIDKMR(25)-MISGILASPGIAFGK(1)	15	2.72e-32		√	√	17.1579
1223	YICC(259)-YICC(188)	ESNTLASKSINAEVTNSAIELK(8)-LVAKLEDAQVQLENNR(4)	15	2.36e-27				n.a.
1224	STPA(32)-STPA(2)	EFSIDVLEEMLEKFR(13)-SVMLQSLNNIR(1)	15	1.13e-25				n.a.
1225	RSUA(40)-RSUA(5)	NAAFKLLPEHDVAYDGNPLAQQHGPR(5)-LDKFIAQQLGVSR(3)	15	3.51e-24		√	√	10.0662
1226	SYT(63)-SYT(227)	VNGELVDACDLIENDAQLSIITAKDEEGLEIIR(24)-KALNAYLQR(1)	15	1.01e-21		√	√	13.6393
1227	ACON2(855)-ACON2(759)	YLNFNQLSQYTEKADGVIFQTAV(13)-MDAAQLTEEGYYSVFGKSGAR(17)	15	1.07e-19		√		33.8873
1228	ALF1(333)-ALF1(2)	SMADGVKLINAVQDVYLDSK(7)-TDIAQLLGK(1)	15	1.05e-16				n.a.
1229	GLMS(246)-GLMS(255)	QDIESNLQYDAGDKGIYR(14)-HYMQKEIYEQPNAIK(5)	15	3.67e-16		√	√	5.83782
1230	SYY(90)-SYY(238)	KLNTEETVQEWVDK(1)-FGKTEGGAVWLDPK(3)	15	1e-15		√	√	19.0882
1231	HNS(32)-HNS(6)	ECTLETLEEMLEKLEVVVNER(13)-SEALKILNNIR(5)	15	2.7e-15		√	√	11.1515
1232	GPMA(113)-GPMA(250)	YGDEQVKQWR(7)-AAAVANQGKAK(11)	15	4.51e-15				n.a.
1233	PHNA(62)-PHNA(104)	DANGNLLADGDSVTIIKDLK(17)-LKSEFVK(2)	15	6.54e-15				n.a.
1234	DEGP(327)-DEGP(454)	GAFVSQVLPNSSAAKAGIK(15)-VLDSKPSVLALNIQR(5)	15	6.58e-15		√	√	17.9642
1235	TRUB(176)-TRUB(74)	HEGNELELEIHCSKGTYIR(14)-FSQYLLDSDKR(10)	15	1.23e-14		√	√	6.84662
1236	HLDE(154)-HLDE(179)	INQALSSIGALVLSDYAKGALASVQQMIQLAR(18)-AGVPVLIDPKGTDFER(10)	15	3.82e-14				n.a.
1237	AHPC(80)-AHPC(169)	LGVDVYAVSTDTHFTHKAWHSSSETIAK(17)-AAQYVASHPGEVCPAKWK(16)	15	4.41e-14				n.a.
1238	PYRF(235)-PYRF(2)	PVTQSVDPAQTLKAINASLQR(13)-TLTASSSSR(1)	15	5.29e-14				n.a.
1239	URK(63)-URK(170)	VKTNYDHPSAMDHSLLLEHLQALK(2)-SMDSVMAQYQKTVR(11)	15	6.41e-14				n.a.
1240	RS5(126)-RS5(86)	AVLEVAGVHNVLAKAYGSTNPINVVR(14)-NMINVALNNGTLQHPVKGVHTGSR(17)	15	6.68e-13		√	√	8.67516
1241	MNMG(283)-MNMG(88)	YCPSIEDKVMR(8)-ILNASKGPAVR(6)	15	3.3e-12				n.a.
1242	IF2(184)-IF2(186)	EQEAAELKR(8)-KAEEEAR(1), REQEAAELKR(9)-KAEEEAR(1)	15	2.73e-11				n.a.
1243	RNB(359)-RNB(501)	HNHALVFKDRPDYR(8)-KYGDMINHR(1)	15	2.89e-11		√		24.5771
1244	RRF(162)-RRF(170)	SQDDVQKLTDAAIK(7)-KIEAALADK(1)	15	1.34e-10		√	√	12.3656
1245	NUSG(106)-NUSG(125)	VMGFIGGTSDRPAPISDKEVDAIMNR(18)-PKTLFEPGEMVR(2)	15	2.26e-10				n.a.
1246	GUAA(307)-GUAA(309)	FLSALAGENDPEAKR(14)-KIIGR(1)	15	5.82e-10		√	√	5.30009
1247	EX3(176)-EX3(121)	TGKCSFLPEER(3)-DHPIKFPAK(5)	15	1.78e-09		√	√	11.6683
1248	IF2(42)-IF2(2)	SADDSVSAQEKQTLIDHLNQK(11)-TDVTIK(1), KSADDSVSAQEKQTLIDHLNQK(12)-TDVTIK(1)	15	2.93e-09		√	√	12.0739
1249	KPYK2(160)-KPYK2(75)	VFTEVTVGGPLSNNKGINK(15)-HVAILGDLQGPKIR(12)	15	6.61e-09				n.a.
1250	YCHF(314)-YCHF(347)	IHTDFEKGFIR(7)-AEGKDYIVK(4)	15	7.1e-09				n.a.
1251	YAJQ(108)-YAJQ(112)	QGIESATQKK(9)-IVKMIK(3)	15	5.99e-08				n.a.
1252	GYRA(603)-GYRA(239)	VYSMKVYQLPEATR(5)-GKVYIR(2)	15	4.49e-07				n.a.
1253	DNAK(502)-DNAK(155)	ITIKASSGLNEDEIQK(4)-QATKDAGR(4)	15	1.05e-05		√	√	20.5558
1254	SYL(289)-SYL(182)	NTKVAEAEMATMEK(3)-CDTKVER(4)	15	1.05e-05		√	√	10.0171
1255	SYT(614)-SYT(638)	RGKDLGSMDVNEVIEK(3)-SLKQLEE(3), GKDLGSMDVNEVIEK(2)-SLKQLEE(3)	15	2.14e-05		√	√	12.7138
1256	ZAPA(2)-ZAPA(42)	SAQPVDIQIFGR(1)-LQDLKER(5)	15	2.56e-05		√	√	21.5305
1257	DBHB(67)-DBHB(67)	NPQTGKEITIAAAK(6)-NPQTGKEITIAAAK(6)	15	6.78e-05				n.a.
1258	EFTU1(10)-EFTU1(5),EFTU2(10)-EFTU2(5)	TKPHVNVGTIGHVDHGK(2)-EKFER(2)	15	0.000107		√	√	6.72168
1259	IMDH(396)-IMDH(383)	GMGSLGAMSKGSSDR(10)-SYKSYR(3)	15	0.000219				n.a.
1260	DEAD(365)-DEAD(2)	TMKLTIPEVELPNAELLGK(3)-AEFETTFADLGLK(1)	14	7.76e-20				n.a.
1261	PGK(82)-PGK(93)	PTEGEYNEEFSLLPVVNYLKDK(20)-LVKDYLDGVDVAEGELVVLENVR(3), VMVTSHLGRPTEGEYNEEFSLLPVVNYLKDK(29)-LVKDYLDGVDVAEGELVVLENVR(3)	14	1.19e-18		√	√	17.1379
1262	KAD(136)-KAD(157)	VYHVKFNPPK(5)-KDDQEETVR(1)	14	5.11e-15		√	√	18.957
1263	MPRA(39)-MPRA(1)	LCMHMQSKLLENR(8)-MDSSFTPIEQMLK(1)	14	2.43e-14				n.a.
1264	KPYK1(68)-KPYK1(76)	TAAILLDTKGPEIR(9)-TMKLEGGNDVSLK(3)	14	8.23e-12		√	√	20.1147
1265	GYRB(460)-GYRB(449)	FDKMLSSQEVATLITALGCGIGR(3)-GKILNVEK(2)	14	1.37e-11				n.a.
1266	TIG(48)-TIG(37)	GKVPMNIVAQR(2)-SELVNVAKK(8), KGKVPMNIVAQR(3)-SELVNVAKK(8)	14	2.22e-11		√	√	7.29616
1267	IDH(62)-IDH(12)	KISWMEIYTGEK(1)-VVVPAQGKK(8)	14	1.08e-10		√	√	10.4073
1268	TOP1(28)-TOP1(91)	YLGSDYVVKSSVGHIR(9)-EKVVSELK(2)	14	2.03e-10		√	√	12.8645
1269	SYY(90)-SYY(250)	KLNTEETVQEWVDK(1)-KTSPYK(1)	14	4.96e-10		√	√	20.4279
1270	RL11(87)-RL11(81)	AAGIKSGSGKPNK(5)-TPPAAVLLKK(9)	14	5.92e-10		√	√	3.68539
1271	CUER(23)-CUER(15)	FYEEKGLVTPPMR(5)-ITGLTSKAIR(7)	14	7.3e-10		√	√	12.0434
1272	PPX(184)-PPX(247)	MGCVSFAQLYFPGGVINKENFQR(18)-LVKEVLR(3)	14	1.62e-09		√	√	9.27078
1273	ODO2(85)-ODO2(300)	EGNSAGKETSAK(7)-IKELAVK(2)	14	1.69e-09				n.a.
1274	SODF(51)-SODF(2)	GTAFEGKSLEEIIR(7)-SFELPALPYAK(1)	14	1.74e-09		√	√	9.58448
1275	YNCE(338)-YNCE(333)	STKQQEATQPDDVIR(3)-TLYVSVKQK(7), STKQQEATQPDDVIR(3)-TLYVSVKQKSTK(7)	14	1.95e-09		√	√	13.0499
1276	PSPA(128)-PSPA(2)	EIGELENKLSETR(8)-GIFSR(1)	14	3.37e-09				n.a.
1277	AHPC(27)-AHPC(12)	NGEFIEITEKDTEGR(10)-IKPFKNQAFK(5)	14	4.48e-09				n.a.
1278	GLMU(392)-GLMU(351)	AGHLTYLGDAEIGDNVNIGAGTITCNYDGANKFK(32)-LRPGAELLEGAHVGNFVEMKK(20)	14	6.54e-09		√	√	11.7442
1279	PURA(2)-PURA(29)	GNNVVVLGTQWGDEGK(1)-AKYVVR(2)	14	3.25e-08		√	√	12.9003
1280	ASTC(89)-ASTC(2)	KLIDATFADR(1)-SQPITR(1)	14	8.02e-08				n.a.
1281	SYL(813)-SYL(853)	AKITVPVDATEEQVR(2)-KVIYVPGKLLNLVVG(8)	14	1.44e-07		√	√	9.61139
1282	RIR1(92)-RIR1(21)	KKAYGQFEPPALYDHVVK(2)-INLDKIHR(5)	14	1.48e-07		√	√	16.9588
1283	YCAR(30)-YCAR(59)	QELICKLDNLAFPLR(6)-VLTADESKS(8)	14	1.73e-07				n.a.
1284	HNS(96)-HNS(2)	AQRPAKYSYVDENGETK(6)-SEALK(1)	14	9.43e-07				n.a.
1285	YBAB(106)-YBAB(20)	MASVSSGMQLPPGFKMPF(15)-QAQQMQEKMQK(8)	14	2.47e-06				n.a.
1286	PFLB(616)-PFLB(386)	KTGNTPDGR(1)-KFAAK(1)	14	3.06e-06		√		42.275
1287	EFG(430)-EFG(159)	ADQEKMGLALGR(5)-VVNQIKTR(6)	14	6.1e-06		√		49.8637
1288	PGM(529)-PGM(2)	KQIEK(1)-AIHNR(1)	14	2.21e-05				n.a.
1289	EFG(532)-EFG(323)	GQYGHVVIDMYPLEPGSNPKGYEFINDIK(20)-HASDDEPFSALAFKIATDPFVGNLTFFR(14)	13	4.41e-24		√		44.2565
1290	DEAD(28)-DEAD(2)	APILEALNDLGYEKPSPIQAECIPHLLNGR(14)-AEFETTFADLGLK(1)	13	5.16e-18				n.a.
1291	DLDH(237)-DLDH(255)	FNLMLETKVTAVEAK(8)-EDGIYVTMEGKK(11)	13	2.38e-17		√	√	8.91746
1292	AMPA(134)-AMPA(185)	QAVETAKETLYSFDQLK(7)-AIQHGLAIAAGIKAAK(13)	13	3.14e-17		√	√	8.52755
1293	SYL(809)-SYL(813)	AMVEDSTLVVVQVNGKVR(16)-AKITVPVDATEEQVR(2)	13	5.92e-17		√	√	11.4525
1294	ISPG(1)-ISPG(355)	MHNQAPIQR(1)-AKASQLDEAR(2)	13	4.75e-16				n.a.
1295	PARE(2)-PARE(334)	TQTYNADAIEVLTGLEPVR(1)-MQDPQFAGQTKER(11)	13	5.4e-16				n.a.
1296	DAPD(241)-DAPD(263)	VPAGSVVVSGNLPSKDGK(15)-GKVGINELLR(2)	13	3.49e-14				n.a.
1297	RNR(513)-RNR(488)	SVLAELGLELPGGNKPEPR(15)-IHDKPSTEAITSFR(4)	13	6.93e-14				n.a.
1298	YIHD(55)-YIHD(61)	ESGFDGELADLTDDILIYHLKMR(21)-DSAKDAVIPGLQK(4)	13	2.23e-13				n.a.
1299	RL9(22)-RL9(112)	VANLGSLGDQVNVKAGYAR(14)-DIADAVTAAGVEVAKSEVR(15)	13	1.6e-12		√	√	20.8607
1300	RNE(106)-RNE(38)	EGQEVIVQIDKEER(11)-KANIYK(1)	13	3.01e-12		√	√	5.49045
1301	SYM(597)-SYM(529)	VALIENAEFVEGSDKLLR(15)-VNPFKALYNR(5)	13	5.98e-12				n.a.
1302	LDHD(271)-LDHD(248)	DLFFEDKSNDVIQDDVFR(7)-GALIDSQAAIEALKNQK(14)	13	8.26e-12				n.a.
1303	RATB(83)-RATB(52)	VEIYRPLIADPKELR(12)-NKVGIYSR(2)	13	1.23e-11				n.a.
1304	FUMA(215)-FUMA(207)	NYLVEKMR(6)-ALLTPGKLK(7)	13	1.98e-10				n.a.
1305	CLPX(188)-CLPX(192)	GIVYIDEIDKISR(10)-KSDNPSITR(1)	13	1.14e-09				n.a.
1306	DLDH(365)-DLDH(370)	VIPSIAYTEPEVAWVGLTEKEAK(20)-EKGISYETATFPWAASGR(2)	13	5.18e-09		√	√	8.69347
1307	ODO2(152)-ODO2(300)	HLAKAPAK(4)-IKELAVK(2)	13	1.21e-08				n.a.
1308	LPTA(140)-LPTA(156)	GDKITYLVK(3)-MQAFSDKGK(7)	13	1.39e-08		√	√	11.9502
1309	AMPP(102)-AMPP(2)	LGQDAAPEKLGVDR(9)-SEISR(1)	13	6.08e-08		√	√	18.3949
1310	RLUB(173)-RLUB(222)	TIKFSGGEGINQWYNVTLTEGR(3)-YGDIPLPKGLPR(8)	13	7.29e-08		√	√	20.5741
1311	IF2(141)-IF2(186),IF2(149)-IF2(186)	EAAEQAKR(7)-KAEEEAR(1)	13	7.81e-08				n.a.
1312	PURA(17)-PURA(268)	GNNVVVLGTQWGDEGKGK(16)-YVDYVLGILKAYSTR(10)	13	8.95e-07		√	√	9.0145
1313	RRF(15)-RRF(1)	MDKCVEAFK(3)-MISDIR(1)	13	1.66e-06		√	√	21.424
1314	CISY(405)-CISY(310)	TVGWIAHWSEMHSDGMKIAR(17)-VYKNYDPR(3)	13	2.81e-06		√	√	18.4489
1315	CLPA(439)-CLPA(450)	IPEKSVSQSDR(4)-DTLKNLGDR(4)	13	5.1e-06		√	√	15.1878
1316	RHO(336)-RHO(181)	MDEVIYEEFKGTGNMELHLSR(10)-GLIVAPPKAGK(8)	13	2.64e-05		√	√	11.7441
1317	GUAA(465)-GUAA(309)	KYDWVVSLR(1)-KIIGR(1)	13	0.000601		√	√	16.3445
1318	PTA(208)-PTA(174)	VNNVDPAKLQESSPLPVLGAVPWSFDLIATR(8)-NTNITGVIVNKLNAPVDEQGR(11)	12	9.84e-26				n.a.
1319	ISPG(197)-ISPG(1)	LLAKQIDQPLHLGITEAGGAR(4)-MHNQAPIQR(1)	12	4.6e-23				n.a.
1320	RHO(326)-RHO(283)	NVEEGGSLTIIATALIDTGSKMDEVIYEEFK(21)-AYNTVVPASGKVLTGGVDANALHRPK(11)	12	4.12e-22		√	√	14.2315
1321	ISPA(45)-ISPA(1)	FIAPLPFQNTPVVETMQYGALLGGKR(25)-MDFPQQLEACVK(1)	12	2.64e-21		√	√	18.2648
1322	LON(427)-LON(651)	NPLFLLDEIDKMSSDMR(11)-AEKLGINPDFYEK(3)	12	1e-19				n.a.
1323	SYP(513)-SYP(126)	KERPGVMFADMELIGIPHTIVLGDR(1)-NELSSYKQLPLNFYQIQTK(7)	12	3.71e-19				n.a.
1324	FUMA(99)-FUMA(352)	NSDIAAKGVLPTCQDTGTAIIVGK(7)-KAGEGEAVR(1)	12	5.37e-18				n.a.
1325	PFLB(643)-PFLB(616)	DQKGAVASLTSVAK(3)-KTGNTPDGR(1)	12	6.31e-18		√		29.8902
1326	METK(284)-METK(246)	YVAKNIVAAGLADR(4)-KIIVDTYGGMAR(1)	12	1.41e-17		√	√	21.8791
1327	SYM(175)-SYM(597)	SPDQYGDNCEVCGATYSPTELIEPKSVVSGATPVMR(25)-VALIENAEFVEGSDKLLR(15)	12	4.14e-17				n.a.
1328	DNAA(81)-DNAA(2)	FEVGTKPVTQTPQAAVTSNVAAPAQVAQTQPQR(6)-SLSLWQQCLAR(1)	12	1.12e-16		√		28.8228
1329	HTPG(492)-HTPG(453)	VDESLEKLADEVDESAK(7)-KGIEVLLLSDR(1)	12	1.82e-16		√	√	11.5718
1330	RLUD(206)-RLUD(37)	THMAVHPMGKPAVTHYR(10)-IKEWILDQR(2)	12	2.78e-15		√		33.8586
1331	SUCD(241)-SUCD(256)	EHVTKPVVGYIAGVTAPKGK(18)-MGHAGAIIAGGKGTADEK(12)	12	7.19e-15		√	√	8.66324
1332	RFAF(125)-RFAF(313)	VLDKEAWPLMVER(4)-LITGYHKVR(7)	12	1.87e-14				n.a.
1333	KPYK1(389)-KPYK1(382)	KYFPDATILALTTNEK(1)-LDAPLIVVATQGGKSAR(14)	12	3.05e-14		√	√	10.3485
1334	CH60(117)-CH60(34)	AVAAGMNPMDLKR(12)-VTLGPKGR(6)	12	3.56e-14		√	√	10.3744
1335	SYY(90)-SYY(144)	KLNTEETVQEWVDK(1)-DIGKHFSVNQMINK(4)	12	5.48e-14		√	√	9.51301
1336	SYM(659)-SYM(597)	FGISEGMVMAAGPGGKDIFLLSPDAGAK(16)-VALIENAEFVEGSDKLLR(15)	12	1.69e-13				n.a.
1337	RNC(154)-RNC(210)	LDEISPGDKQKDPK(11)-KAEQAAAEQALK(1)	12	2.77e-13				n.a.
1338	EFTU1(314)-EFTU1(325),EFTU2(314)-EFTU2(325)	FESEVYILSKDEGGR(10)-HTPFFKGYR(6)	12	3.65e-13		√	√	18.4022
1339	SYA(637)-SYA(648)	NLPIETNIMDLEAAKAK(15)-GAMALFGEKYDER(9)	12	1.51e-12				n.a.
1340	MALE(41)-MALE(323)	LVIWINGDKGYNGLAEVGK(9)-DKPLGAVALK(2)	12	1.55e-12		√	√	5.32566
1341	ODP2(317)-ODP2(346)	AEGKSEFAENDAYVHATPLIR(4)-EFGVNLAKVK(8)	12	5.82e-10				n.a.
1342	G3P1(116)-G3P1(213)	KVVMTGPSKDNTPMFVK(1)-GASQNIIPSSTGAAKAVGK(15)	12	8.26e-10		√		25.9501
1343	BCP(40)-BCP(114)	VLVYFYPKAMTPGCTVQACGLR(8)-SFMGKTYDGIHR(5)	12	1.12e-09				n.a.
1344	TIG(83)-TIG(146)	EKINPAGAPTYVPGEYK(2)-KQQATWK(1)	12	1.95e-09		√		54.498
1345	IF2(184)-IF2(141),IF2(184)-IF2(149)	EQEAAELKR(8)-EAAEQAKR(7), REQEAAELKR(9)-EAAEQAKR(7)	12	1.99e-09				n.a.
1346	SURA(278)-SURA(388)	GESKNISVTEVHAR(4)-NVDKTDAAQK(4)	12	2.71e-09				n.a.
1347	PYRH(68)-PYRH(2)	GAGLAKAGMNR(6)-ATNAKPVYK(1), GAGLAKAGMNR(6)-ATNAK(1)	12	2.81e-09				n.a.
1348	SUCD(43)-SUCD(2)	MVGGVTPGKGGTTHLGLPVFNTVR(9)-SILIDK(1)	12	1.04e-08		√		34.0544
1349	SYP(547)-SYP(554)	NLDNDDIEYKYR(10)-NGEKQLIK(4)	12	2.3e-08				n.a.
1350	SYV(600)-SYV(593)	TEKQFPNGIEPHGTDALR(3)-TGNMMQPQLADKIR(12)	12	2.71e-08				n.a.
1351	RL29(9)-RL29(54)	EKSVEELNTELLNLLR(2)-VKTLLNEK(2)	12	3.26e-08		√	√	10.2077
1352	PGK(156)-PGK(127)	AQASTHGIGKFADVACAGPLLAAELDALGK(10)-KDDETLSKK(8)	12	4e-08		√	√	8.23052
1353	HNS(83)-HNS(2)	EMLIADGIDPNELLNSLAAVKSGTK(21)-SEALK(1)	12	4.37e-08				n.a.
1354	SYFA(64)-SYFA(34)	ELPPEERPAAGAVINEAKEQVQQALNAR(18)-VEYLGKK(6), PAAGAVINEAKEQVQQALNAR(11)-VEYLGKK(6)	12	7.18e-08				n.a.
1355	ARGR(45)-ARGR(52)	FSSQGEIVAALQEQGFDNINQSKVSR(23)-MLTKFGAVR(4)	12	1.02e-07		√	√	10.0752
1356	FKBA(92)-FKBA(42)	SKLSDQEIEQTLQAFEAR(2)-AAFKNDDQK(4)	12	2.32e-07		√	√	13.3189
1357	DNAK(597)-DNAK(556)	MQELAQVSQKLMEIAQQQHAQQQTAGADASANNAK(10)-QVEEAGDKLPADDK(8), MQELAQVSQKLMEIAQQQHAQQQTAGADASANNAK(10)-KQVEEAGDKLPADDK(9)	12	6.01e-07		√	√	7.77211
1358	RIR1(91)-RIR1(21)	KKAYGQFEPPALYDHVVK(1)-INLDKIHR(5)	12	1.18e-06		√	√	14.1691
1359	KDGR(18)-KDGR(2)	QPDSVSSVLKVFGILQALGEER(10)-ANADLDK(1)	12	1.38e-06				n.a.
1360	RL28(10)-RL28(54)	VCQVTGKR(7)-VSAKGMR(4)	12	1.76e-06		√	√	8.48218
1361	DNAK(452)-DNAK(514)	AADNKSLGQFNLDGINPAPR(5)-ASSGLNEDEIQKMVR(12)	12	1.87e-06		√	√	11.5129
1362	AMPP(267)-AMPP(2)	DGDLVLIDAGCEYKGYAGDITR(14)-SEISR(1)	12	2.1e-06		√	√	8.23217
1363	RIMP(112)-RIMP(2)	KWQGVIK(1)-STLEQK(1)	12	2.17e-06				n.a.
1364	YEBC(6)-YEBC(14)	AGHSKWANTR(5)-KAAQDAK(1)	12	2.84e-06		√	√	12.1087
1365	EFG(303)-EFG(440)	GVQAMLDAVIDYLPSPVDVPAINGILDDGKDTPAER(30)-LAKEDPSFR(3)	12	2.93e-06		√		28.055
1366	RAIA(102)-RAIA(91)	AATSVKDANFVEEVEEE(6)-LQHKGEAR(4)	12	3.85e-06		√	√	17.8547
1367	PEPD(315)-PEPD(315)	AALIAKSR(6)-AALIAKSR(6)	12	4.8e-06				n.a.
1368	UVRY(1)-UVRY(25)	MINVLLVDDHELVR(1)-ILEDIKGIK(6)	12	7.82e-06				n.a.
1369	NDK(57)-NDK(11)	GFYAEHDGKPFFDGLVEFMTSGPIVVSVLEGENAVQR(9)-TFSIIKPNAVAK(6)	12	5.46e-05		√	√	19.956
1370	YECF(2)-YECF(44)	STPDFSTAENNQELANEVSCLK(1)-VMLKMEK(4)	12	0.000186				n.a.
1371	DEOB(259)-DEOB(272)	HGQVVSVGKIADIYANCGITK(9)-KVKATGLDALFDATIK(1)	11	8.14e-25				n.a.
1372	GLTI(247)-GLTI(80)	KLMDDTIAQVQTSGEAEK(1)-KLNKPDLQVK(1)	11	1.74e-22				n.a.
1373	SECA(421)-SECA(448)	KDLPDLVYMTEAEK(1)-TAKGQPVLVGTISIEK(3)	11	4.12e-22		√	√	16.118
1374	PYRG(196)-PYRG(223)	TKPTQHSVKELLSIGIQPDILICR(9)-AKIALFCNVPEK(2)	11	8.56e-20		√	√	14.8169
1375	HTPG(552)-HTPG(103)	LTDTPAIVSTDADEMSTQMAKLFAAAGQK(21)-SGTKSFLESLGSDQAK(4)	11	2.15e-17		√	√	18.4214
1376	OSMY(143)-OSMY(64)	GYAGDTATTSEIKAK(13)-VKAALVDHDNIK(2)	11	1.58e-16				n.a.
1377	CYSH(178)-CYSH(136)	GVFKVLPIIDWDNR(4)-YNDINKVEPMNR(6)	11	5.74e-16		√	√	16.5309
1378	ODP2(313)-ODP2(346)	AEAPAAAPAAKAEGK(11)-EFGVNLAKVK(8)	11	3.7e-15				n.a.
1379	TIG(181)-TIG(327)	VTIDFTGSVDGEEFEGGKASDFVLAMGQGR(18)-FGGNEKQALELPR(6)	11	7.15e-15		√		45.768
1380	KAD(13)-KAD(157)	IILLGAPGAGKGTQAQFIMEK(11)-KDDQEETVR(1)	11	8.43e-15		√	√	18.5491
1381	PTA(198)-PTA(115)	TRPDLSEIFDDSSKAK(14)-KHQFAQSLNYEIAK(1)	11	1.1e-14				n.a.
1382	SUHB(57)-SUHB(14)	KSYPQHTIITEESGELEGTDQDVQWVIDPLDGTTNFIK(1)-KAGNLIAK(1)	11	4.21e-14		√	√	13.7484
1383	SURA(293)-SURA(252)	HILLKPSPIMTDEQAR(5)-KGDIVGPIR(1)	11	4.52e-14		√		61.388
1384	RLMJ(34)-RLMJ(30)	DKPFLYLDTHAGAGR(2)-HTVQSLIIESLKEK(12)	11	1.39e-13		√	√	7.99919
1385	ASPA(140)-ASPA(468)	GEYQYLNPNDHVNKCQSTNDAYPTGFR(14)-GLLTEAELDDIFSVQNLMHPAYKAK(23)	11	1.5e-12				n.a.
1386	NRDR(117)-NRDR(121)	MIGNLVMEQLKK(11)-LDKVAYIR(3)	11	5.86e-12				n.a.
1387	PURR(41)-PURR(24)	NAVWAAIKELHYSPSAVAR(8)-ANVSTTTVSHVINKTR(14)	11	6.71e-12		√	√	16.7066
1388	RL7(96)-RL7(85)	DLVESAPAALKEGVSK(11)-EAKDLVESAPAALK(3)	11	1.14e-11		√	√	13.748
1389	EFTU1(10)-EFTU1(57),EFTU2(10)-EFTU2(57)	TKPHVNVGTIGHVDHGK(2)-AFDQIDNAPEEKAR(12)	11	1.23e-11		√		27.0376
1390	BCP(84)-BCP(74)	LSRFAEKELLNFTLLSDEDHQVCEQFGVWGEK(7)-AGVDVLGISTDKPEK(12), FAEKELLNFTLLSDEDHQVCEQFGVWGEK(4)-AGVDVLGISTDKPEKLSR(12)	11	2.51e-11				n.a.
1391	FKBA(127)-FKBA(116)	DAADNEAKGK(8)-SSAQAKMEK(6)	11	5.21e-11		√	√	16.2412
1392	TIG(48)-TIG(287)	GKVPMNIVAQR(2)-VKSQAIEGLVK(2)	11	7.27e-11		√		71.9549
1393	OPGG(340)-OPGG(219)	YDLRPSAWVTPKGEWGK(12)-ATGAYKFVVMPGR(6)	11	8.52e-11				n.a.
1394	SYK2(179)-SYK2(2)	YLDLIANDKSR(9)-SEQETR(1)	11	1.19e-10				n.a.
1395	CH60(42)-CH60(390)	NVVLDKSFGAPTITK(6)-VGAATEVEMKEK(10)	11	2.14e-10		√	√	12.3278
1396	YCIO(102)-YCIO(117)	NNTPGNYTFILKGTK(12)-KTIGMR(1)	11	3.81e-10				n.a.
1397	PTGA(15)-PTGA(2)	SLVSDDKK(7)-GLFDK(1), SLVSDDKKDTGTIEIIAPLSGEIVNIEDVPDVVFAEK(7)-GLFDK(1)	11	5.37e-10				n.a.
1398	G6PD(147)-G6PD(228)	VVMEKPLGTSLATSQEINDQVGEYFEECQVYR(5)-WGYFDKAGQMR(6)	11	1.19e-09				n.a.
1399	IMDH(396)-IMDH(424)	GMGSLGAMSKGSSDR(10)-VAYKGR(4)	11	1.31e-09				n.a.
1400	MENC(170)-MENC(194)	AWTPLKGQQFAK(6)-IAFLEEPCKTR(9)	11	1.68e-09		√	√	10.5752
1401	HSLU(223)-HSLU(109)	DAMKLLIEEEAAK(4)-DLTDAAVKMVR(8)	11	4.48e-09		√	√	19.7623
1402	RELA(212)-RELA(216)	YLHPTEYKR(8)-IAKLLHER(3)	11	6.9e-09				n.a.
1403	AHPF(179)-AHPF(194)	NVMGVPAVFVNGKEFGQGR(13)-MTLTEIVAKIDTGAEK(9)	11	1.46e-08		√	√	13.3758
1404	PYRH(68)-PYRH(212)	GAGLAKAGMNR(6)-DHKLPIR(3)	11	1.81e-08		√	√	17.4403
1405	ODO2(94)-ODO2(300)	SEEKASTPAQR(4)-IKELAVK(2)	11	4.91e-08				n.a.
1406	YFCD(170)-YFCD(166)	NAKNEAVETETAE(3)-ALALWMKR(7)	11	7.77e-08				n.a.
1407	SYW(113)-SYW(198)	MTQFKDKSAR(7)-MSKSDDNR(3), DKSAR(2)-MSKSDDNRNNVIGLLEDPK(3)	11	1.22e-07				n.a.
1408	ARCA(89)-ARCA(195)	DNEVDKILGLEIGADDYITKPFNPR(6)-ELKPHDR(3)	11	1.76e-07				n.a.
1409	FKBA(257)-FKBA(269)	ADAKPEADAK(4)-AADSAKK(6)	11	2.62e-07				n.a.
1410	ACCD(16)-ACCD(100)	KASIPEGVWTK(1)-LASAQKETGEK(6)	11	1.48e-06				n.a.
1411	IF2(141)-IF2(173),IF2(149)-IF2(173)	EAAEQAKR(7)-NAQAEKAR(6)	11	1.93e-06				n.a.
1412	HNS(120)-HNS(2)	TPAVIKK(6)-SEALK(1)	11	3.41e-06				n.a.
1413	RLMM(118)-RLMM(122)	ELLKFCR(4)-KFTVPLR(1)	11	4.01e-06		√	√	6.43558
1414	YDCH(59)-YDCH(1)	LQLKDEMLK(4)-MFPEYR(1)	11	4.4e-06				n.a.
1415	GUAA(212)-GUAA(1)	DICQCEALWTPAKIIDDAVAR(13)-MTENIHK(1)	11	7.01e-06				n.a.
1416	RS15(65)-RS15(73)	KLLDYLK(1)-KDVAR(1)	11	9.98e-06		√	√	11.0755
1417	MTNN(216)-MTNN(19)	AISDVADQQSHLSFDEFLAVAAKQSSLMVESLVQK(23)-DKIENR(2)	11	2.8e-05		√	√	12.4778
1418	GYRB(460)-GYRB(447)	FDKMLSSQEVATLITALGCGIGR(3)-NQAILPLKGK(8)	11	3.39e-05				n.a.
1419	RNR(86)-RNR(33)	LDLVKGTVIGHR(5)-EKPASR(2)	11	4.34e-05				n.a.
1420	RL28(62)-RL28(54)	KGIDTVLAELR(1)-VSAKGMR(4)	11	0.000153		√	√	11.1371
1421	6PGD(93)-6PGD(75)	PYLDKGDIIIDGGNTFFQDTIR(5)-ILLMVKAGAGTDAAIDSLK(6)	11	0.000283		√		25.2209
1422	SYV(1)-SYV(909)	MEKTYNPQDIEQPLYEHWEK(1)-IENKLANEGFVAR(4)	10	5.34e-21				n.a.
1423	SUCC(106)-SUCC(205)	LVTYQTDANGQPVNQILVEAATDIAKELYLGAVVDR(26)-DLALIEINPLVITKQGDLICLDGK(14)	10	7.47e-21		√	√	7.94368
1424	RPOD(121)-RPOD(371)	EGEIDIAKR(8)-MSIGEAKAR(7)	10	9.45e-17		√	√	10.2321
1425	RODZ(297)-RODZ(274)	LKIGAPAAVQIQYQGKPVDLSR(2)-KLFSGMQR(1)	10	3.19e-16				n.a.
1426	CH60(470)-CH60(441)	QIVLNCGEEPSVVANTVKGGDGNYGYNAATEEYGNMIDMGILDPTK(18)-GQNEDQNVGIKVALR(11)	10	5.1e-15		√	√	15.0361
1427	CAPP(17)-CAPP(1)	SNVSMLGKVLGETIK(8)-MNEQYSALR(1)	10	1.3e-14				n.a.
1428	DEOB(393)-DEOB(374)	ETFADIGQTLAKYFGTSDMEYGK(12)-VKPGSLGHR(2)	10	1.18e-11				n.a.
1429	MENB(54)-MENB(54)	NAFRPLTVKEMIQALADAR(9)-NAFRPLTVKEMIQALADAR(9)	10	2.08e-11		√	√	0
1430	OMPR(85)-OMPR(184)	SQSNPMPIIMVTAKGEEVDR(14)-DKLMNLAR(2)	10	2.19e-11				n.a.
1431	RPOB(1158)-RPOB(2)	QKVDLSTFSDEEVMR(2)-VYSYTEK(1)	10	2.2e-11		√	√	9.80838
1432	MEND(292)-MEND(2)	ATSELQQAQIVVQLGSSLTGKR(21)-SVSAFNR(1)	10	2.23e-11		√	√	21.5508
1433	EFTU1(177)-EFTU1(57),EFTU2(177)-EFTU2(57)	GSALKALEGDAEWEAK(5)-AFDQIDNAPEEKAR(12)	10	2.67e-11		√	√	20.5298
1434	NUSA(16)-NUSA(22)	EILAVVEAVSNEKALPR(13)-EKIFEALESALATATK(2)	10	3.41e-11		√	√	10.2628
1435	PROQ(54)-PROQ(1)	VAGEMNLSKTQLR(9)-MENQPK(1)	10	1.28e-10				n.a.
1436	SYGB(592)-SYGB(112)	VSNILAKSDEVLSDR(7)-LTTDKGEWLLYR(5)	10	1.98e-10				n.a.
1437	SKP(39)-SKP(161)	IAIVNMGSLFQQVAQKTGVSNTLENEFK(16)-DITADVLKQVK(11)	10	1.59e-09		√	√	9.25755
1438	PHOL(107)-PHOL(1)	VLEQSAESVPEYGKAVNIK(14)-MNIDTR(1)	10	7.35e-09				n.a.
1439	ACON2(20)-ACON2(7)	AAEGIAPKPLDANQMAALVELLK(8)-KHVAER(1)	10	7.38e-09		√	√	11.8947
1440	IHFA(66)-IHFA(97)	NPKTGEDIPITAR(3)-VENASPKDE(7)	10	1.93e-08		√		31.221
1441	YHEO(206)-YHEO(231)	GIFDIKDAINQVADR(6)-QFKSGDFQGQDK(3)	10	3.02e-08				n.a.
1442	IF2(131)-IF2(141),IF2(131)-IF2(149)	EAQQKAER(5)-EAAEQAKR(7)	10	3.16e-08				n.a.
1443	HSLU(80)-HSLU(2)	LANAPFIKVEATK(8)-SEMTPR(1)	10	6.16e-08		√	√	21.7149
1444	RL3(55)-RL3(7)	AIQVTTGAKK(9)-MIGLVGKK(7)	10	7.38e-08		√	√	13.4111
1445	YFIF(25)-YFIF(141)	SDDDSDKR(7)-FKEALR(2)	10	1.22e-07				n.a.
1446	PURA(161)-PURA(125)	VGDLFDKETFAEKLK(13)-GAKAIGTTGR(3)	10	1.77e-07		√	√	12.9323
1447	SYD(399)-SYD(315)	TAAQDGDMIFFGADNKK(16)-SVEFAVFAGPANDPKGR(15)	10	3.13e-07		√	√	5.60712
1448	GLYA(326)-GLYA(346)	VVSGGTDNHLFLVDLVDKNLTGKEADAALGR(18)-ANITVNKNSVPNDPK(7)	10	3.2e-07		√	√	14.6824
1449	SYA(232)-SYA(744)	QADGTMEPLPKPSVDTGMGLER(11)-QLEKELQQLK(4)	10	5.03e-07				n.a.
1450	RL1(205)-RL1(54)	AKPTQAKGVYIK(7)-KSDQNVR(1)	10	1.05e-06		√	√	9.04203
1451	SKP(85)-SKP(85)	TKLEKDVMAQR(5)-LEKDVMAQR(3), LEKDVMAQR(3)-LEKDVMAQR(3)	10	2.12e-06		√	√	0
1452	UPP(70)-UPP(14)	KITVVPILR(1)-HKLGLMR(2)	10	6.85e-06		√	√	14.3124
1453	TALB(262)-TALB(2)	KLSYTGEVK(1)-TDKLTSLR(1)	10	1.21e-05		√	√	18.3137
1454	MALE(128)-MALE(201)	YNGKLIAYPIAVEALSLIYNK(4)-YENGKYDIK(5)	10	4.96e-05		√	√	6.27456
1455	HNS(6)-HNS(2)	SEALKILNNIR(5)-SEALK(1)	10	0.000356		√	√	5.90925
1456	RS1(260)-RS1(247)	VSLGLKQLGEDPWVAIAK(6)-VLKFDR(3)	10	0.000392				n.a.
1457	RS1(411)-RS1(370)	KGDEIAAVVLQVDAER(1)-VEGKIK(4)	10	0.000785				n.a.
1458	HTPG(14)-HTPG(103)	GFQSEVKQLLHLMIHSLYSNK(7)-SGTKSFLESLGSDQAK(4)	9	5.52e-27		√	√	11.4245
1459	MUKE(13)-MUKE(2)	SSTNIEQVMPVKLAQALANPLFPALDSALR(12)-SSTNIEQVMPVK(1)	9	4.52e-20				n.a.
1460	SYI(732)-SYI(5)	FCSVEMGSFYLDIIKDR(15)-SDYKSTLNLPETGFPMR(4)	9	5.23e-20				n.a.
1461	YIEP(21)-YIEP(2)	NLSYVLAEKLAQR(9)-PLSAQQLAAQK(1)	9	4.18e-19				n.a.
1462	GYRB(433)-GYRB(395)	DPALSELYLVEGDSAGGSAKQGR(20)-KGALDLAGLPGK(1)	9	1.81e-18				n.a.
1463	FABZ(119)-FABZ(128)	PVVPGDQMIMEVTFEKTR(16)-FKGVALVDGK(2), RPVVPGDQMIMEVTFEKTR(17)-FKGVALVDGK(2)	9	3.19e-18				n.a.
1464	ODP2(366)-ODP2(313)	EDVQAYVKEAIK(8)-AEAPAAAPAAKAEGK(11)	9	6.25e-18				n.a.
1465	MASZ(702)-MASZ(653)	AASDLIFLGVKQPNGYTEPLLHAWR(11)-HGILTKEQVQASLENMAK(6)	9	1.04e-15		√	√	14.309
1466	RIR1(341)-RIR1(584)	HMDYGVQINKLMYTR(10)-GILPIDTYKK(9)	9	3.4e-15		√	√	12.4502
1467	RS15(2)-RS15(48)	SLSTEATAK(1)-KDHHSR(1)	9	3.22e-13		√	√	16.9756
1468	GLYA(380)-GLYA(293)	EAEAKELAGWMCDVLDSINDEAVIER(5)-TYQQQVAKNAK(8)	9	5.12e-13		√	√	10.692
1469	MNMA(193)-MNMA(191)	KDSTGICFIGER(1)-IAEDLGLVTAKK(11)	9	4.9e-12		√	√	6.72504
1470	RPOB(1133)-RPOB(1178)	INAMLKQQQEVAK(6)-KGMPIATPVFDGAK(1)	9	2.7e-11		√	√	11.4566
1471	OPDA(679)-OPDA(311)	GREPQLDAMLEHYGIKG(16)-ARPQGEKELAQLR(7)	9	2.74e-11				n.a.
1472	GRPE(7)-GRPE(66)	EQKTPEGQAPEEIIMDQHEEIEAVEPEASAEQVDPR(3)-VKAEMENLR(2)	9	4.47e-11				n.a.
1473	CRL(15)-CRL(1)	KFTALGPYIR(1)-MTLPSGHPK(1)	9	5.69e-11				n.a.
1474	KDSA(189)-KDSA(284)	KVSGNSPVIFDVTHALQCR(1)-GFEELDTSK(9)	9	3.24e-10		√	√	18.6502
1475	RIR1(723)-RIR1(584)	DLLTAYKFGVK(7)-GILPIDTYKK(9)	9	2.11e-09		√	√	7.58715
1476	HTPG(14)-HTPG(99)	GFQSEVKQLLHLMIHSLYSNK(7)-DEVIDHLGTIAKSGTK(12)	9	2.8e-09		√	√	12.2135
1477	PGK(176)-PGK(302)	FADVACAGPLLAAELDALGKALK(20)-NAKTILWNGPVGVFEFPNFR(3)	9	3.64e-09		√	√	11.077
1478	ENTE(441)-ENTE(432)	GGEKIAAEEIENLLLR(4)-EKDQINR(2)	9	7.57e-09		√	√	10.7305
1479	GPH(166)-GPH(136)	YFSVVIGGDDVQNKKPHPDPLLLVAER(14)-GLPLGLVTNKPTPFVAPLLEALDIAK(10)	9	1.28e-08				n.a.
1480	DSBG(76)-DSBG(29)	HAISGYMYNEKGENLSNTLIEK(11)-AIEKQGITIIK(4)	9	1.87e-08		√	√	10.204
1481	RLMKL(38)-RLMKL(1)	TELENLGAVECQVVQGGVHFKGDTR(21)-MNSLFASTAR(1)	9	2.51e-08		√	√	6.27415
1482	CH10(74)-CH10(34)	VGDIVIFNDGYGVKSEK(14)-SAGGIVLTGSAAAKSTR(14)	9	3.59e-08		√	√	11.9429
1483	FKBA(116)-FKBA(69)	SSAQAKMEK(6)-EQEKLGIK(4)	9	7.83e-08		√	√	8.57979
1484	KDSA(138)-KDSA(60)	TGAVINVKK(8)-ASFDKANR(5)	9	9.65e-08		√	√	14.7715
1485	PSPA(21)-PSPA(2)	FADIVNANINALLEKAEDPQK(15)-GIFSR(1)	9	1e-07				n.a.
1486	PFKB(247)-PFKB(302)	VVVSLGPQGALGVDSENCIQVVPPPVKSQSTVGAGDSMVGAMTLK(27)-LCSHDDTQKIYAYLSR(9)	9	1.04e-07		√	√	13.7455
1487	SURA(405)-SURA(394)	KFSEEAASWMQEQR(1)-TDAAQKDR(6)	9	1.14e-07				n.a.
1488	GCH1(69)-GCH1(137)	IAKMYVDEIFSGLDYANFPK(3)-DSVIGLSKINR(8)	9	1.87e-07		√	√	16.8571
1489	GSHR(282)-GSHR(199)	TNEKGYIVVDK(4)-KHAPLR(1)	9	2.25e-07		√		22.4467
1490	YCIO(115)-YCIO(117)	LLQEKR(5)-KTIGMR(1)	9	6.41e-07				n.a.
1491	GYRA(239)-GYRA(2)	GKVYIR(2)-SDLAR(1)	9	7.46e-07				n.a.
1492	YJJK(45)-YJJK(2)	IGVLGLNGAGKSTLLR(11)-AQFVYTMHR(1)	9	8.65e-07		√		25.9196
1493	GLYA(293)-GLYA(375)	TYQQQVAKNAK(8)-GFKEAEAK(3)	9	8.81e-07		√	√	8.09444
1494	PEPB(86)-PEPB(1)	KVVWPDLDDAQR(1)-MTEAMK(1)	9	1.21e-06				n.a.
1495	HLDE(470)-HLDE(365)	KIQQDK(1)-KLGDR(1)	9	1.69e-06				n.a.
1496	MENB(1)-MENB(273)	MIYPDEAMLYAPVEWHDCSEGFEDIR(1)-NAFNQKR(6)	9	2.12e-06		√	√	7.38809
1497	PURA(293)-PURA(82)	VGAGPFPTELFDETGEFLCKQGNEFGATTGR(20)-ENVTSIIGNGVVLSPAALMKEMK(20)	9	2.43e-06		√		29.3938
1498	AROA(22)-AROA(340)	VDGTINLPGSKSVSNR(11)-VKETDR(2)	9	4.9e-06		√	√	14.835
1499	PUR1(327)-PUR1(350)	QGFVKNR(5)-KLNANR(1)	9	6.42e-06		√	√	5.35028
1500	RELB(22)-RELB(2)	SYAALEKMGVTPSEALR(7)-GSINLR(1)	9	7.67e-06		√	√	21.1056
1501	KAD(192)-KAD(211)	EAEAGNTKYAK(8)-ADLEKILG(5)	9	9.34e-06		√	√	13.0824
1502	IF3(77)-IF3(82)	FLYEKSK(5)-SSKEQK(3)	9	1.19e-05				n.a.
1503	GYRA(18)-GYRA(239)	EITPVNIEEELKSSYLDYAMSVIVGR(12)-GKVYIR(2)	9	1.89e-05		√		35.8354
1504	ODO2(2)-ODO2(90)	SSVDILVPDLPESVADATVATWHK(1)-ETSAKSEEK(5)	9	2.65e-05				n.a.
1505	CAPP(1)-CAPP(43)	MNEQYSALR(1)-KLSKSSR(4), MNEQYSALR(1)-LSKSSR(3)	9	6.18e-05				n.a.
1506	PCNB(79)-PCNB(218)	KPKDFDVTTNATPEQVR(3)-FAAKLGMR(4)	9	0.000152				n.a.
1507	IMDH(110)-IMDH(383)	EVKELTER(3)-SYKSYR(3)	9	0.00018				n.a.
1508	SELB(422)-SELB(349)	KILDTLATYHEQHR(1)-KPEYLQWLASLAR(1)	8	3.24e-23				n.a.
1509	EX1(305)-EX1(287)	LVHINKCPVLAQANTLRPEDADR(6)-LYTAKTDLGDNAAVPVK(5)	8	6.09e-21		√		22.7932
1510	IHFA(45)-IHFA(66)	ALENGEQVKLSGFGNFDLR(9)-NPKTGEDIPITAR(3)	8	7.59e-21		√		38.0067
1511	PUTA(434)-PUTA(459)	LVKGAYWDSEIKR(3)-KVYTDVSYLACAK(1)	8	2.05e-18		√	√	9.44751
1512	IDH(142)-IDH(100)	YYQGTPSPVKHPELTDMVIFR(10)-VAIKGPLTTPVGGGIR(4)	8	3.25e-17		√		32.7965
1513	RECG(165)-RECG(159)	KLTDQALDLLDTCAIEELLPPELSQGMMTLPEALR(1)-VQGDLSTPELQETLTPVYPTTEGVKQATLR(25)	8	2.79e-16				n.a.
1514	YIFE(98)-YIFE(58)	FHTLSGGKPQVEGAEDYTDSDD(8)-EPVTEEEKLFVAVCR(8)	8	3.22e-16				n.a.
1515	6PGD(394)-6PGD(301)	ITDAYAENPQIANLLLAPYFKQIADDYQQALR(21)-VAASKVLSGPQAQPAGDK(5)	8	7.04e-16		√	√	11.5576
1516	HNS(32)-HNS(96)	ECTLETLEEMLEKLEVVVNER(13)-AQRPAKYSYVDENGETK(6)	8	1.95e-15				n.a.
1517	AHPC(151)-AHPC(186)	KIKAAQYVASHPGEVCPAK(1)-EGEATLAPSLDLVGKI(15)	8	4.11e-15				n.a.
1518	MIAB(8)-MIAB(58)	LHIKTWGCQMNEYDSSK(4)-AQEKVFHQLGR(4)	8	3.07e-14				n.a.
1519	IMDH(411)-IMDH(411)	YFQSDNAADKLVPEGIEGR(10)-YFQSDNAADKLVPEGIEGR(10)	8	3.48e-14				n.a.
1520	G3P1(116)-G3P1(108)	KVVMTGPSK(1)-KHITAGAK(1)	8	5.36e-13		√	√	10.4433
1521	NADC(164)-NADC(154)	SALKYAVLCGGGANHR(4)-KTLPGLR(1)	8	2.4e-12				n.a.
1522	ADHE(875)-ADHE(882)	DYVEGETAAKK(10)-EAAPAKAEK(6)	8	1.4e-11				n.a.
1523	DNAK(577)-DNAK(635)	TAIESALTALETALKGEDK(15)-DDDVVDAEFEEVKDKK(13)	8	1.31e-10				n.a.
1524	QSEB(151)-QSEB(200)	IATLAGEPLTLKPK(12)-KLGSDFIR(1)	8	1.32e-10				n.a.
1525	GLPQ(140)-GLPQ(128)	FPMGKSDFR(5)-KVQTYPGR(1)	8	3.23e-10		√	√	13.8231
1526	YIIM(19)-YIIM(48)	IQAYPEGKPSAIAK(8)-KVHGGPDR(1)	8	3.85e-10				n.a.
1527	G3P1(124)-G3P1(217)	VVMTGPSKDNTPMFVK(8)-AVGKVLPELNGK(4)	8	7.32e-10		√	√	12.5801
1528	CH60(51)-CH60(34)	SFGAPTITKDGVSVAR(9)-VTLGPKGR(6)	8	1.96e-09		√	√	6.56079
1529	OPPA(352)-OPPA(494)	AQGNMPAYGYTPPYTDGAKLTQPEWFGWSQEK(19)-TALYTKAEQQLDK(6)	8	2.25e-09		√	√	10.291
1530	RLUB(222)-RLUB(264)	YGDIPLPKGLPR(8)-MKANQIR(2)	8	6.68e-09				n.a.
1531	KAD(145)-KAD(136)	VEGKDDVTGEELTTR(4)-VYHVKFNPPK(5)	8	1.08e-08		√	√	13.93
1532	RS5(52)-RS5(23)	VGFGYGKAR(7)-VSKTVK(3)	8	1.66e-08		√	√	11.1387
1533	RL9(112)-RL9(35)	DIADAVTAAGVEVAKSEVR(15)-NFLVPQGKAVPATK(8)	8	1.92e-08		√	√	13.6566
1534	GPMA(146)-GPMA(86)	LSEKELPLTESLALTIDR(4)-SWKLNER(3)	8	2.39e-08		√	√	13.2085
1535	CMOA(165)-CMOA(185)	IYQGLNPGGALVLSEKFSFEDAK(16)-VGELLFNMHHDFKR(13)	8	3.66e-08		√	√	14.3009
1536	EFTS(281)-EFTS(214)	VETDFAAEVAAMSKQS(14)-EIAEKMVEGR(5)	8	6.68e-08		√		28.9492
1537	TYPA(115)-TYPA(427)	KAFAYGLKPIVVINK(1)-KGDLKNMNPDGK(5)	8	9.38e-08				n.a.
1538	SYI(105)-SYI(410)	GLSGYDSPYVPGWDCHGLPIELKVEQEYGKPGEK(23)-HKTPIIFR(2)	8	2.43e-07				n.a.
1539	YBIT(433)-YBIT(278)	LLFSQDDIKKPAK(9)-FSANASKSR(7)	8	2.75e-07				n.a.
1540	RPOC(585)-RPOC(557)	AILWMIVPKGLPYSIVNQALGK(9)-ITEYEKDANGELVAK(6)	8	1.29e-06		√	√	8.50945
1541	RLMG(2)-RLMG(143)	SHLDNGFR(1)-IIAGAKAR(6)	8	3.03e-06				n.a.
1542	IMDH(479)-IMDH(396)	ISGAGIQESHVHDVTITKESPNYR(18)-GMGSLGAMSKGSSDR(10)	8	3.36e-06				n.a.
1543	SYN(351)-SYN(294)	YLAEEHFKAPVVVK(8)-VDKDAVSR(3)	8	3.49e-06				n.a.
1544	EFTS(25)-EFTS(43)	KALTEANGDIELAIENMR(1)-KSGAIK(1)	8	5.15e-06		√	√	12.9569
1545	ENO(120)-ENO(180)	FGANAILAVSLANAKAAAAAK(15)-TVKEAIR(3)	8	5.46e-06		√		23.7716
1546	IF3(77)-IF3(80)	FLYEKSK(5)-SSKEQK(1)	8	8.76e-06				n.a.
1547	SYT(330)-SYT(426)	EYCIKPMNCPGHVQIFNQGLK(5)-LSTRPEKR(7)	8	1.01e-05		√	√	19.6264
1548	YJJK(434)-YJJK(18)	FNFKGVDQGK(4)-VVPPKR(5)	8	1.18e-05		√	√	10.7693
1549	LON(49)-LON(412)	KIMLVAQK(1)-MAKVGVK(3)	8	5.52e-05				n.a.
1550	G3P1(108)-G3P1(108)	KHITAGAK(1)-KHITAGAK(1)	8	0.000104		√	√	0
1551	RPOC(9)-RPOC(1)	FLKAQTK(3)-MKDLLK(1)	8	0.000111				n.a.
1552	IF2(756)-IF2(665)	KVIEAESLDLR(1)-EVKLAR(3)	8	0.000142		√		37.0233
1553	DBHA(51)-DBHA(67)	EGDAVQLVGFGTFKVNHR(14)-NPQTGKEIK(6)	8	0.000148				n.a.
1554	FUR(2)-FUR(10)	TDNNTALK(1)-KAGLK(1)	8	0.000153				n.a.
1555	MDAB(173)-MDAB(102)	ANQFLGMEPLPTFIANDVIKMPDVPR(20)-KDPSKK(1), ANQFLGMEPLPTFIANDVIKMPDVPR(20)-KDPSK(1)	8	0.000274		√	√	15.3773
1556	YHEV(55)-YHEV(47)	KDEQVIGIFHPD(1)-EADKEAR(4)	8	0.00029				n.a.
1557	SYC(73)-SYC(266)	NITDIDDKIIK(8)-EKMSK(2)	8	0.000412		√	√	20.042
1558	SYR(473)-SYR(408)	KAEIDEEQLAAAPVIIR(1)-LVAEKNPDMPADELEK(5)	7	1.17e-31		√	√	19.7893
1559	SYP(12)-SYP(34)	TSQYLLSTLKETPADAEVISHQLMLR(10)-KLASGLYTWLPTGVR(1)	7	2.02e-20				n.a.
1560	DDLA(330)-DDLA(267)	VDVFLTPENEVVINEINTLPGFTNISMYPKLWQASGLGYTDLITR(30)-YIDEDGAKVVVPAAIAPEINDK(8)	7	4.22e-20				n.a.
1561	GYRB(460)-GYRB(395)	FDKMLSSQEVATLITALGCGIGR(3)-KGALDLAGLPGK(1)	7	1.11e-18				n.a.
1562	RL9(112)-RL9(42)	DIADAVTAAGVEVAKSEVR(15)-KNIEFFEAR(1)	7	1.57e-17		√		22.1682
1563	FETP(64)-FETP(90)	KLLEQEMVNFLFEGK(1)-EVHIEGYTPEDKK(12)	7	2.67e-17		√		28.5538
1564	ODP2(302)-ODP2(410)	QEAAAPAPAAKAEAPAAAPAAK(11)-IQKISGANLSR(3)	7	1.16e-16				n.a.
1565	EFG(594)-EFG(562)	LHFGSYHDVDSSELAFKLAASIAFK(17)-GIQEQLKAGPLAGYPVVDMGIR(7)	7	9.02e-14		√	√	14.5085
1566	SYV(600)-SYV(909)	TEKQFPNGIEPHGTDALR(3)-IENKLANEGFVAR(4)	7	1.67e-13				n.a.
1567	PROB(217)-PROB(172)	AIAGDSVSGLGTGGMSTKLQAADVACR(18)-LLLLTDQKGLYTADPR(8)	7	2.34e-13		√	√	13.0366
1568	MAP1(33)-MAP1(117)	LAAEVLEMIEPYVKPGVSTGELDR(14)-MFIVGKPTIMGER(6)	7	7.87e-13		√	√	9.87073
1569	RS1(522)-RS1(450)	AKDEADEK(2)-KGAIVTGK(1)	7	1.16e-12		√	√	11.6226
1570	LPP(75)-LPP(75)	LDNMATKYR(7)-LDNMATKYR(7)	7	1.51e-12		√	√	0
1571	FOLC(60)-FOLC(188)	LGVLKPAPFVFTVAGTNGKGTTCR(19)-EKAGIFR(2)	7	5.02e-12				n.a.
1572	SYT(614)-SYT(200)	GKDLGSMDVNEVIEK(2)-LMKTAGAYWR(3)	7	1.58e-11		√		41.1521
1573	UPP(208)-UPP(116)	AHPDVELYTASIDQGLNEHGYIIPGLGDAGDKIFGTK(37)-NEETLEPVPYFQKLVSNIDER(13)	7	1.67e-11		√	√	8.92913
1574	HEMH(25)-HEMH(29)	TGILLANLGTPDAPTPEAVKR(20)-YLKQFLSDR(3)	7	6.28e-11				n.a.
1575	YCAR(17)-YCAR(30)	LLEIIACPVCNGKLWYNQEK(13)-QELICKLDNLAFPLR(6)	7	8.62e-11				n.a.
1576	SURA(269)-SURA(252)	SGVGFHILKVNDLR(9)-KGDIVGPIR(1)	7	1.21e-10		√	√	8.24267
1577	KGUA(17)-KGUA(148)	AQGTLYIVSAPSGAGKSSLIQALLK(16)-GQDSEEVIAKR(10)	7	1.24e-10		√	√	18.5697
1578	EFG(271)-EFG(143)	VLNNEIILVTCGSAFKNK(16)-IAFVNKMDR(6)	7	1.88e-10		√	√	7.34243
1579	RCSB(21)-RCSB(154)	KSLEQIEWVNVVGEFEDSTALINNLPK(1)-LSPKESEVLR(4)	7	2.06e-10				n.a.
1580	CH60(327)-CH60(321)	VVINKDTTTIIDGVGEEAAIQGR(5)-ATLEDLGQAKR(10)	7	2.43e-10		√	√	16.1498
1581	TRXB(8)-TRXB(321)	HSKLLILGSGPAGYTAAVYAAR(3)-YLDGLADAK(9)	7	9.7e-10		√	√	13.7059
1582	TIG(368)-TIG(390)	VKGLIEEMASAYEDPK(2)-EVIEFYSKNK(8)	7	1.48e-09		√	√	12.0614
1583	SRP54(278)-SRP54(1)	FLGVGEKTEALEPFHPDR(7)-MFDNLTDR(1)	7	1.59e-09				n.a.
1584	DNAK(166)-DNAK(155)	IAGLEVKR(7)-QATKDAGR(4)	7	1.7e-09		√	√	9.25954
1585	RCSB(140)-RCSB(180)	LLEKISAGGYGDK(4)-SIKTISSQK(3), LLEKISAGGYGDKR(4)-SIKTISSQK(3)	7	2.28e-09				n.a.
1586	FTSE(155)-FTSE(124)	AVVNKPAVLLADEPTGNLDDALSEGILR(5)-VSAALDKVGLLDK(7)	7	3.04e-09				n.a.
1587	PPIA(187)-PPIA(154)	ISQVPTHDVGPYQNVPSKPVVILSAKVLP(26)-VVKGMDVADK(3)	7	6.16e-09		√	√	14.5379
1588	RELA(212)-RELA(164)	YLHPTEYKR(8)-EVKDAPEDER(3)	7	8.03e-09				n.a.
1589	ACCA(18)-ACCA(46)	SLNFLDFEQPIAELEAKIDSLTAVSR(17)-EKSVELTR(2)	7	9.3e-09				n.a.
1590	CH60(327)-CH60(390)	VVINKDTTTIIDGVGEEAAIQGR(5)-VGAATEVEMKEK(10)	7	1.23e-08		√	√	17.456
1591	MURF(202)-MURF(111)	AKGEIFSGLPENGIAIMNADNNDWLNWQSVIGSR(2)-VVALTGSSGKTSVK(10)	7	1.06e-07				n.a.
1592	ALF(52)-ALF(72)	ENNFALPAVNCVGTDSINAVLETAAKVK(26)-APVIVQFSNGGASFIAGKGVK(18)	7	1.7e-07		√	√	12.5498
1593	RS1(528)-RS1(450)	AKDEADEKDAIATVNK(8)-KGAIVTGK(1)	7	1.7e-07		√	√	0.477145
1594	AMPN(852)-AMPN(2)	AALEQLKGLENLSGDLYEK(7)-TQQPQAK(1)	7	2.43e-07				n.a.
1595	IF2(125)-IF2(141),IF2(125)-IF2(149)	EAEESAKR(7)-EAAEQAKR(7)	7	2.59e-07				n.a.
1596	DEOC(246)-DEOC(2)	FGASSLLASLLKALGHGDGK(12)-TDLKASSLR(1)	7	2.77e-07		√	√	13.4449
1597	FABA(162)-FABA(113)	LIYTASDLKVGLFQDTSAF(9)-ALGVGEVKFTGQVLPTAK(8)	7	5.74e-07		√	√	9.14195
1598	RIR1(760)-RIR1(648)	DGAEDAQDDLVPSIQDDGCESGACKI(25)-ASKDGILR(3)	7	1.06e-06				n.a.
1599	RRF(146)-RRF(138)	DKEISEDDDR(2)-DANDKVK(5), DKEISEDDDRR(2)-DANDKVK(5)	7	1.7e-06		√	√	10.8612
1600	FUMC(8)-FUMC(426)	SEKDSMGAIDVPADK(3)-AAEIAKK(6)	7	2e-06		√		71.2224
1601	ODO2(133)-ODO2(148)	LLAEHNLDASAIKGTGVGGR(13)-EDVEKHLAK(5)	7	2.44e-06		√	√	9.88953
1602	RSD(79)-RSD(17)	ILHKLEGNGQLAR(4)-GSNKLVDR(4)	7	2.91e-06		√	√	11.9077
1603	GPMI(178)-GPMI(107)	FAALGKGR(6)-AKNAGK(2)	7	4.64e-06				n.a.
1604	YQJH(254)-YQJH(229)	AAAYWHAK(8)-VVKNLSR(3)	7	5e-06				n.a.
1605	ARGR(6)-ARGR(52)	SSAKQEELVK(4)-MLTKFGAVR(4)	7	6.38e-06		√	√	18.3777
1606	RNC(152)-RNC(35)	LDEISPGDKQK(9)-SASSKHNER(5)	7	7.8e-06				n.a.
1607	IF3(125)-IF3(89)	FLEEGDKAKITLR(9)-QKVIQVK(2), AKITLR(2)-QKVIQVK(2)	7	1.53e-05				n.a.
1608	CYSP(71)-CYSP(153)	QSHAGSSKQALAILQGLK(8)-LIFPNPKTSGNAR(7)	7	1.85e-05				n.a.
1609	METJ(35)-METJ(23)	VLKILTDER(3)-SEQVKK(5)	7	2.13e-05		√	√	10.0995
1610	PHOL(112)-PHOL(119)	AVNIKTK(5)-GVIKPR(4)	7	2.68e-05				n.a.
1611	FKBA(119)-FKBA(110)	MEKDAADNEAK(3)-VKSSAQAK(2)	7	3.53e-05		√	√	14.5078
1612	ENGB(149)-ENGB(57)	ADKLASGAR(3)-TSKTPGR(3)	7	3.72e-05				n.a.
1613	RPOD(462)-RPOD(557)	IPVHMIETINKLNR(11)-EAKVLR(3)	7	6.13e-05		√		64.1207
1614	TYPA(427)-TYPA(114)	KGDLKNMNPDGK(5)-FVTKK(4)	7	9.9e-05				n.a.
1615	PCNB(252)-PCNB(218)	LFEESLKLLQAGYGYETYK(7)-FAAKLGMR(4)	7	0.000147				n.a.
1616	EFG(303)-EFG(555)	GVQAMLDAVIDYLPSPVDVPAINGILDDGKDTPAER(30)-GGVIPGEYIPAVDKGIQEQLK(14)	7	0.000152		√		51.1297
1617	TYRB(277)-TYRB(21)	VLGQLKATVR(6)-FKEDPR(2)	7	0.000176		√	√	19.9502
1618	FIS(25)-FIS(25)	VNSDVLTVSTVNSQDQVTQKPLR(20)-VNSDVLTVSTVNSQDQVTQKPLR(20)	7	0.000392		√	√	0
1619	GRPE(66)-GRPE(4)	VKAEMENLR(2)-SSKEQK(3)	7	0.00076				n.a.
1620	YGGE(134)-YGGE(62)	LNSLLDGALKAGLNEIR(10)-DAATAKK(6)	7	0.000852				n.a.
1621	SSB(44)-SSB(44)	DKATGEMK(2)-DKATGEMK(2)	7	0.0012		√	√	0
1622	YNCE(251)-YNCE(338)	AFITDSKAAEVLVVDTR(7)-STKQQEATQPDDVIR(3)	6	1.9e-27		√		22.0845
1623	SYH(211)-SYH(65)	VLDSKNPEVQALLNDAPALGDYLDEESR(5)-AIGEVTDVVEKEMYTFEDR(11)	6	5.75e-23				n.a.
1624	OPPD(163)-OPPD(139)	MKMYPHEFSGGMR(2)-NMSKAEAFEESVR(4)	6	8.49e-20				n.a.
1625	EX3(36)-EX3(255)	HQPDVIGLQETKVHDDMFPLEEVAK(12)-SMEKPSDHAPVWATFR(4)	6	3.03e-18		√	√	15.9337
1626	LPTA(91)-LPTA(71)	EVIDGYGKPATFYQMQDNGKPVEGHASQMHYELAK(8)-INADKVVVTRPGGEQGK(5)	6	3.65e-18				n.a.
1627	ODP2(366)-ODP2(410)	EDVQAYVKEAIK(8)-IQKISGANLSR(3)	6	1.53e-17				n.a.
1628	TRUA(79)-TRUA(2)	KDAAWTLGVNANLPGDIAVR(1)-SDQQQPPVYK(1)	6	1.43e-16				n.a.
1629	KCY(23)-KCY(165)	GTLCKAMAEALQWHLLDSGAIYR(5)-MLQLQEKGFSVNFER(7)	6	3.52e-15		√	√	20.3608
1630	TYPA(50)-TYPA(59)	VMDSNDLEKER(9)-GITILAKNTAIK(7)	6	7.59e-15				n.a.
1631	DPS(140)-DPS(27)	AIGEAKDDDTADILTAASR(6)-KATVELLNR(1)	6	1.12e-13		√	√	11.0491
1632	OSMY(143)-OSMY(81)	GYAGDTATTSEIKAK(13)-STDISVKTDQK(7)	6	1.64e-13				n.a.
1633	ODO1(274)-ODO1(287)	KPQDLFDEFAGK(1)-HKEHLGTGDVK(2)	6	2.97e-13				n.a.
1634	OPDA(303)-OPDA(679)	MAENPQQVLDFLTDLAKR(17)-GREPQLDAMLEHYGIKG(16)	6	1.63e-12				n.a.
1635	PGK(27)-PGK(84)	ADLNVPVKDGKVTSDAR(8)-DKLSNPVR(2)	6	3.81e-12		√	√	18.869
1636	PANC(206)-PANC(181)	IAPGLYKVLSSIADK(7)-AKDGLALSSR(2)	6	2.88e-11		√	√	12.6573
1637	COABC(292)-COABC(289)	KQATQGDELTIK(1)-AATVAPEKIK(8)	6	4.67e-11				n.a.
1638	CLPB(335)-CLPB(325)	FQKVFVAEPSVEDTIAILR(3)-QYIEKDAALER(5)	6	1.23e-10		√	√	13.5519
1639	YEHS(100)-YEHS(91)	IAFSLKTDDILAILTEQQFR(6)-INNNIVLKK(8)	6	1.57e-09				n.a.
1640	YHBY(89)-YHBY(1)	TLVLYRPTKER(9)-MNLSTK(1)	6	2.08e-09				n.a.
1641	GPDA(144)-GPDA(110)	EALGDQIPLAVISGPTFAKELAAGLPTAISLASTDQTFADDLQQLLHCGK(19)-LVWATKGLEAETGR(6)	6	5.7e-09				n.a.
1642	MDH(312)-MDH(82)	DIALGEEFVNK(11)-KPGMDR(1)	6	1.58e-08		√		24.2874
1643	DLDH(106)-DLDH(278)	VINQLTGGLAGMAKGR(14)-VPNGKNLDAGK(5)	6	1.83e-08		√		30.7613
1644	SYA(784)-SYA(279)	LLVSELSGVEPKMLR(12)-VTGATDLSNKSLR(10)	6	2.11e-08				n.a.
1645	SYV(342)-SYV(194)	KAVVAAVDALGLLEEIKPHDLTVPYGDR(1)-ESKGSMWHIR(3)	6	6.6e-08				n.a.
1646	GLNH(147)-GLNH(153)	SGTGSVDYAKANIK(10)-TKDLR(2)	6	1.38e-07		√	√	11.2198
1647	RLMJ(133)-RLMJ(1)	SEFQKDSR(5)-MLSYR(1)	6	4.99e-07		√		30.6402
1648	GUAA(351)-GUAA(377)	WLAQGTIYPDVIESAASATGKAHVIK(21)-MGLVEPLKELFKDEVR(8)	6	7.55e-07				n.a.
1649	EFTU1(325)-EFTU1(264),EFTU2(325)-EFTU2(264)	HTPFFKGYR(6)-KLLDEGR(1), HTPFFKGYRPQFYFR(6)-KLLDEGR(1)	6	9.28e-07		√		27.6789
1650	RHO(181)-RHO(348)	GLIVAPPKAGK(8)-KIAEK(1)	6	9.37e-07		√	√	9.60117
1651	IF2(131)-IF2(125)	EAQQKAER(5)-EAEESAKR(7)	6	1.22e-06				n.a.
1652	IF2(866)-IF2(665)	NGMECGIGVKNYNDVR(10)-EVKLAR(3)	6	1.47e-06		√		67.1675
1653	MOG(137)-MOG(187)	QALILNLPGQPKSIK(12)-PKSAR(2)	6	1.52e-06		√		33.0716
1654	TALB(262)-TALB(4)	KLSYTGEVK(1)-TDKLTSLR(3)	6	2.41e-06		√	√	13.7091
1655	SYW(198)-SYW(111)	MSKSDDNR(3)-MTQFKDK(5)	6	2.79e-06				n.a.
1656	EFG(153)-EFG(507)	MGANFLKVVNQIK(7)-HAKQSGGR(3)	6	2.82e-06		√		87.2283
1657	RPOB(1262)-RPOB(1073)	STGSYSLVTQQPLGGKAQFGGQR(16)-HGNKGVISK(4)	6	5.53e-06		√		25.1119
1658	BCP(114)-BCP(1)	SFMGKTYDGIHR(5)-MNPLK(1)	6	6.9e-06				n.a.
1659	RL3(1)-RL3(8)	MIGLVGK(1)-KVGMTR(1)	6	1.03e-05		√	√	19.9562
1660	SYI(436)-SYI(583)	AQSLKEIK(5)-GKAPYR(2)	6	1.27e-05				n.a.
1661	YFIF(55)-YFIF(25)	DDKQSQPR(3)-SDDDSDKR(7)	6	1.43e-05				n.a.
1662	GYRA(298)-GYRA(2)	DESDKDGMR(5)-SDLAR(1)	6	2.17e-05				n.a.
1663	DCD(58)-DCD(178)	GHTAAFIDLSGPKDEVSAALDR(13)-REDAKYR(5)	6	2.36e-05		√	√	13.9998
1664	ACCD(16)-ACCD(2)	KASIPEGVWTK(1)-SWIER(1)	6	2.6e-05				n.a.
1665	IMDH(156)-IMDH(178)	FVTDLNQPVSVYMTPKER(16)-MHEKR(4)	6	3.76e-05				n.a.
1666	LRP(129)-LRP(162)	KLLGETLLR(1)-LVIKTR(4)	6	3.8e-05		√	√	17.6852
1667	YFIF(55)-YFIF(141)	DDKQSQPR(3)-FKEALR(2)	6	5.34e-05				n.a.
1668	NFNB(14)-NFNB(119)	HSTKAFDASK(4)-AANDKGR(5)	6	5.86e-05		√	√	17.0363
1669	SYT(200)-SYT(213)	LMKTAGAYWR(3)-GDSNNKMLQR(6)	6	6.31e-05		√	√	19.3754
1670	RS1(1)-RS1(247)	MTESFAQLFEESLK(1)-VLKFDR(3)	6	0.000102				n.a.
1671	EFG(389)-EFG(425)	AGDIAAAIGLKDVTTGDTLCDPDAPIILER(11)-TKADQEK(2)	6	0.000147		√		27.346
1672	MAP1(196)-MAP1(2)	ETNVVLKPGMTFTIEPMVNAGK(7)-AISIK(1)	6	0.000208		√	√	11.3216
1673	PYRG(432)-PYRG(432)	SEKSDLGGTMR(3)-SEKSDLGGTMR(3)	6	0.000275				n.a.
1674	RLMD(150)-RLMD(65)	KAGSSDIVDVK(1)-AKVVR(2)	6	0.000628		√	√	16.2624
1675	MAP1(86)-MAP1(224)	SVCISINEVVCHGIPDDAKLLK(19)-DGWTVKTK(6)	6	0.000763		√	√	15.2782
1676	RPOC(325)-RPOC(334)	RPLKSLADMIK(4)-GKQGR(2), PLKSLADMIK(3)-GKQGR(2)	6	0.00338		√	√	8.57879
1677	YDGH(112)-YDGH(208)	VINGVVELPKDQAVLIEPFDTVTVQGFYR(10)-KVEIPGVATTASPSSEVGR(1)	5	3.71e-21				n.a.
1678	CRP(131)-CRP(189)	LQVTSEKVGNLAFLDVTGR(7)-ILKMLEDQNLISAHGK(3)	5	1.56e-20		√		23.0474
1679	CSDE(1)-CSDE(42)	MTNPQFAGHPFGTTVTAETLR(1)-QLIMLGKQLPALPDELK(7)	5	2.03e-16		√		34.6256
1680	YHFA(58)-YHFA(111)	APSPMEMVLMAAGGCSAIDVVSILQKGR(26)-AVDLSAEKYCSVALMLEK(8)	5	2.53e-16		√	√	16.3616
1681	FABI(43)-FABI(205)	EGAELAFTYQNDKLK(13)-KMLAHCEAVTPIR(1)	5	3.74e-16		√		25.5547
1682	RF3(47)-RF3(2)	VLLFGQAIQTAGTVKGR(15)-TLSPYLQEVAK(1)	5	6.76e-16				n.a.
1683	ISPH(260)-ISPH(1)	EVKCVGVTAGASAPDILVQNVVAR(3)-MQILLANPR(1)	5	9.1e-16		√	√	4.17844
1684	DEOD(27)-DEOD(27)	AKYIAETFLEDAR(2)-AKYIAETFLEDAR(2)	5	1.23e-15		√	√	0
1685	CLPB(451)-CLPB(530)	LDMLNEELSDKER(11)-NKVTDAEIAEVLAR(2), RLDMLNEELSDKER(12)-NKVTDAEIAEVLAR(2)	5	5.12e-15				n.a.
1686	EFG(423)-EFG(430)	MEFPEPVISIAVEPKTK(15)-ADQEKMGLALGR(5)	5	1.36e-14		√	√	10.9821
1687	6PGD(136)-6PGD(49)	ELSAEGFNFIGTGVSGGEEGALKGPSIMPGGQK(23)-TEEVIAENPGKK(11)	5	2.46e-14		√	√	14.8878
1688	PANC(236)-PANC(199)	DLDEIITIAGQELNEKGFR(16)-KIAPGLYK(1)	5	3.11e-14		√	√	10.7801
1689	IF2(779)-IF2(710)	YYSVIYNLIDEVKAAMSGMLSPELK(13)-ADVQGSVEAISDSLLKLSTDEVK(16)	5	7.93e-14		√		26.1892
1690	FETP(28)-FETP(90)	EAEGQDFQLYPGELGKR(16)-EVHIEGYTPEDKK(12)	5	1.61e-13		√	√	19.4377
1691	CLPB(431)-CLPB(176)	LEQQALMKESDEASK(8)-AEQGKLDPVIGR(5)	5	1.83e-13				n.a.
1692	PNP(397)-PNP(51)	TDTFLFHYNFPPYSVGETGMVGSPKR(25)-AKPGQDFFPLTVNYQER(2)	5	1.91e-13		√		24.0613
1693	RATB(61)-RATB(52)	PAKLSDSVHDGDR(3)-NKVGIYSR(2)	5	1.2e-12				n.a.
1694	DINJ(16)-DINJ(2)	IDEDLKNQAADVLAGMGLTISDLVR(6)-AANAFVR(1)	5	7.66e-12				n.a.
1695	RS8(56)-RS8(2)	EEGFIEDFKVEGDTKPELELTLK(15)-SMQDPIADMLTR(1)	5	2.45e-11		√	√	11.9589
1696	CAPP(693)-CAPP(676)	SATPEQELGKLPLGSR(10)-ENKDFVPYFR(3)	5	9.38e-11		√		24.3367
1697	RBSA(403)-RBSA(367)	TPSMEQAIGLLSGGNQQKVAIAR(18)-AGGSLKHADEQQAVSDFIR(6)	5	1.58e-10				n.a.
1698	TKT2(275)-TKT2(4)	QKLGWHHPPFEIPK(2)-KDLANAIR(1)	5	1.63e-10				n.a.
1699	CH60(311)-CH60(242)	AMLQDIATLTGGTVISEEIGMELEKATLEDLGQAK(25)-EMLPVLEAVAKAGK(11)	5	1.76e-10		√	√	11.3532
1700	SRMB(221)-SRMB(372)	KIHQWYYR(1)-YIEEPIKAR(7)	5	2.65e-10		√	√	14.3748
1701	TALB(187)-TALB(301)	ILDWYKANTDKK(6)-KFAIDQEK(1)	5	3e-10		√	√	19.4521
1702	TYSY(259)-TYSY(48)	FEDFEIEGYDPHPGIKAPVAI(16)-FNLQDGFPLVTTKR(13)	5	6.03e-10		√	√	8.97992
1703	SYV(861)-SYV(898)	LESITVLPADDKGPVSVTKIIDGAELLIPMAGLINK(12)-EVAKIEGEISR(4)	5	7.2e-10				n.a.
1704	PT1(238)-PT1(250)	NDDYLILDAVNNQVYVNPTNEVIDKMR(25)-AVQEQVASEKAELAK(10)	5	1.66e-09		√	√	18.3986
1705	AHPC(186)-AHPC(93)	EGEATLAPSLDLVGKI(15)-IKYAMIGDPTGALTR(2)	5	1.98e-09				n.a.
1706	BCP(109)-BCP(1)	ELLNFTLLSDEDHQVCEQFGVWGEKSFMGK(25)-MNPLK(1)	5	3.79e-09				n.a.
1707	RL22(49)-RL22(42)	KVLESAIANAEHNDGADIDDLK(1)-KAAVLVK(1)	5	1.28e-08		√	√	10.5407
1708	FKBA(179)-FKBA(127)	GTLIDGKEFDNSYTR(7)-DAADNEAKGK(8)	5	1.98e-08		√	√	14.303
1709	SYA(784)-SYA(56)	LLVSELSGVEPKMLR(12)-DVFLGLDKR(8)	5	2.09e-08				n.a.
1710	RL27(44)-RL27(78)	GTKFHAGANVGCGR(3)-KFISIEAE(1)	5	2.7e-08		√	√	4.68969
1711	LRP(25)-LRP(162)	NILNELQKDGR(8)-LVIKTR(4)	5	3.24e-08		√	√	12.8819
1712	DEOD(57)-DEOD(84)	KISVMGHGMGIPSCSIYTK(1)-ELITDFGVKK(9)	5	4.43e-08		√	√	12.4609
1713	TSAA(19)-TSAA(201)	EKFAVPR(2)-KGEETGK(1)	5	5.36e-08				n.a.
1714	CLPA(475)-CLPA(450)	AIEALTEAIKMAR(10)-DTLKNLGDR(4)	5	7.36e-08		√	√	8.43712
1715	RSMI(260)-RSMI(274)	TLALLQAELPLKK(12)-KNALYK(1)	5	7.5e-08				n.a.
1716	RSMB(291)-RSMB(296)	VYDNLKR(6)-LGMKATVK(4)	5	2.06e-07		√	√	7.44189
1717	HCHA(112)-HCHA(2)	FEYWAMPHKDEK(9)-TVQTSK(1)	5	2.43e-07				n.a.
1718	NFUA(100)-NFUA(97)	KVADDAPLMER(1)-APNAKMR(5)	5	3.07e-07				n.a.
1719	EFTS(182)-EFTS(182)	PEFIKPEDVSAEVVEK(5)-PEFIKPEDVSAEVVEK(5)	5	3.48e-07		√	√	0
1720	YBAK(73)-YBAK(77)	HLAVAVTPVAGQLDLKK(16)-VAKALGAK(3)	5	7.39e-07		√	√	6.20299
1721	EFTU1(188)-EFTU1(264),EFTU2(188)-EFTU2(264)	ALEGDAEWEAKILELAGFLDSYIPEPER(11)-KLLDEGR(1)	5	8.81e-07		√	√	13.6591
1722	RS4(83)-RS4(77)	LKGNTGENLLALLEGR(2)-NYYKEAAR(4)	5	1.04e-06		√	√	10.0731
1723	SYQ(318)-SYQ(2)	IGVTKQDNTIEMASLESCIR(5)-SEAEAR(1)	5	1.07e-06				n.a.
1724	OPGG(142)-OPGG(75)	VLYPINSKDK(8)-AYWNNLKTPFK(7), VLYPINSKDKNDEIVSMLGASYFR(8)-AYWNNLKTPFK(7)	5	1.24e-06		√	√	13.4946
1725	MUTS(103)-MUTS(496)	LVNQGESVAICEQIGDPATSKGPVER(21)-QTLKNAER(4)	5	1.4e-06		√		24.3629
1726	MRP(116)-MRP(259)	NIIAVSSGKGGVGK(9)-KGIVMFEK(1)	5	1.58e-06				n.a.
1727	EFTS(214)-EFTS(2)	EIAEKMVEGR(5)-AEITASLVK(1)	5	1.65e-06		√		39.6964
1728	IF2(173)-IF2(186)	NAQAEKAR(6)-KAEEEAR(1)	5	2.68e-06				n.a.
1729	YPFJ(285)-YPFJ(182)	GFDSGDPAQCNTFGKSI(15)-LLGIEPKVR(7)	5	2.92e-06				n.a.
1730	MOG(23)-MOG(137)	ASSGVYQDKGIPALEEWLTSALTTPFELETR(9)-QALILNLPGQPKSIK(12)	5	3.1e-06				n.a.
1731	IF2(141)-IF2(155),IF2(149)-IF2(155)	EAAEQAKR(7)-EAAEKDK(5)	5	3.2e-06				n.a.
1732	RS7(25)-RS7(11)	FGSELLAKFVNILMVDGK(8)-KILPDPK(1)	5	4.07e-06		√	√	8.06755
1733	SYA(269)-SYA(784)	TLIQAVAKVTGATDLSNK(8)-LLVSELSGVEPKMLR(12)	5	4.87e-06				n.a.
1734	ARGR(52)-ARGR(15)	MLTKFGAVR(4)-AFKALLK(3)	5	5.44e-06		√	√	11.3019
1735	RL2(71)-RL2(68)	NKDGIPAVVER(2)-IVDFKR(5)	5	7.16e-06		√	√	8.48
1736	DPO3X(337)-DPO3X(2)	KELPYAPDR(1)-SYQVLAR(1)	5	1.17e-05		√		41.237
1737	TOP1(627)-TOP1(788)	TASTGVFLGCSGYALPPKER(18)-DGAAGVFLAANTFPKSR(15)	5	1.28e-05				n.a.
1738	HHA(2)-HHA(30)	SEKPLTK(1)-VIEKNK(4)	5	1.33e-05		√		24.7973
1739	METK(284)-METK(373)	YVAKNIVAAGLADR(4)-TDKAQLLR(3)	5	3.03e-05		√	√	9.49635
1740	SUCD(285)-SUCD(272)	SLADIGEALKTVLK(10)-FAALEAAGVKTVR(10)	5	3.2e-05		√	√	10.8489
1741	CYSJ(525)-CYSJ(254)	EKVYVQDK(2)-NSEKDVR(4)	5	4.83e-05		√	√	17.135
1742	RF2(362)-RF2(58)	NTQAVLDGSLDQFIEASLKAGL(19)-AQALGKER(6)	5	5.04e-05		√	√	17.2003
1743	PHSM(362)-PHSM(188)	LVKGLLPR(3)-VTKDGR(3)	5	5.29e-05		√	√	13.7615
1744	SYI(171)-SYI(583)	ALGKIIGNGHLHK(4)-GKAPYR(2)	5	6.29e-05				n.a.
1745	PCNB(77)-PCNB(218)	KPKDFDVTTNATPEQVR(1)-FAAKLGMR(4)	5	6.42e-05				n.a.
1746	IF2(710)-IF2(665)	ADVQGSVEAISDSLLKLSTDEVK(16)-EVKLAR(3)	5	6.62e-05		√	√	18.8316
1747	ENGB(156)-ENGB(188)	KAQLNMVR(1)-QGVDKLR(5)	5	6.76e-05		√	√	16.2123
1748	ODP1(508)-ODP1(513)	ALNVMLKNK(7)-SIKDR(3)	5	6.99e-05		√	√	5.93812
1749	ODO1(1)-ODO1(71)	MQNSALK(1)-LAKDASR(3)	5	9.15e-05				n.a.
1750	ODP1(881)-ODP1(865)	FNIDADKVNPR(7)-RGEIDKK(6)	5	0.000168		√	√	20.0089
1751	LEPA(516)-LEPA(543)	MKDLIPR(2)-STVKQLR(4)	5	0.00017		√	√	10.3183
1752	IMDH(479)-IMDH(383)	ISGAGIQESHVHDVTITKESPNYR(18)-SYKSYR(3)	5	0.000194				n.a.
1753	METK(370)-METK(373)	EHFPWEKTDK(7)-TDKAQLLR(3)	5	0.00032		√	√	8.01115
1754	ODP2(410)-ODP2(348)	IQKISGANLSR(3)-VKGTGR(2)	5	0.000412				n.a.
1755	SYH(378)-SYH(371)	ADKWGAR(3)-KQFAR(1)	5	0.000578		√	√	10.1035
1756	DLDH(370)-DLDH(299)	EKGISYETATFPWAASGR(2)-VDKQLR(3)	5	0.00105		√	√	21.7023
1757	PTGA(16)-PTGA(2)	SLVSDDKKDTGTIEIIAPLSGEIVNIEDVPDVVFAEK(8)-GLFDK(1)	5	0.00174				n.a.
1758	ADHE(148)-ADHE(51)	DATNKAADIVLQAAIAAGAPK(5)-IPLAKMAVAESGMGIVEDK(5)	4	5.46e-21				n.a.
1759	YCHF(15)-YCHF(82)	CGIVGLPNVGKSTLFNALTK(11)-GASKGEGLGNQFLTNIR(4)	4	1.06e-19				n.a.
1760	RIR1(760)-RIR1(716)	DGAEDAQDDLVPSIQDDGCESGACKI(25)-VPMQQLLKDLLTAYK(8)	4	2.61e-18				n.a.
1761	MNMA(175)-MNMA(191)	DQSYFLYTLSHEQIAQSLFPVGELEKPQVR(26)-IAEDLGLVTAKK(11)	4	2.91e-16		√	√	12.2899
1762	TIG(368)-TIG(392)	VKGLIEEMASAYEDPKEVIEFYSK(2)-NKELMDNMR(2)	4	1.43e-15		√	√	13.151
1763	FLIC(42)-FLIC(59)	INSAKDDAAGQAIANR(5)-FTSNIKGLTQAAR(6)	4	1.6e-14				n.a.
1764	YCIT(73)-YCIT(228)	MMSNYTLKR(8)-VITDSKIR(6)	4	3.51e-14				n.a.
1765	SYN(114)-SYN(194)	VEVAGWVEDPDTYPMAAKR(18)-NDQGKVDFDKDFFGK(5), VEVAGWVEDPDTYPMAAKR(18)-NDQGKVDFDK(5)	4	8.28e-14				n.a.
1766	YBAK(132)-YBAK(1)	LPTIIDAPAQEFATIYVSGGKR(21)-MTPAVK(1)	4	1.07e-13				n.a.
1767	RBSA(251)-RBSA(277)	KLEDQYPHLDKAPGDIR(11)-KGEILGVSGLMGAGR(1)	4	1.33e-13				n.a.
1768	EFEO(275)-EFEO(355)	VVGGAAGLIEEVAASKISGEEDR(16)-NALKGPITALAEDLAQLR(4)	4	1.75e-13				n.a.
1769	RLMF(285)-RLMF(5)	EMAQGQKQSR(7)-SAQKPGLHPR(4)	4	2.54e-13				n.a.
1770	ODO1(476)-ODO1(479)	HGHNEADEPSATQPLMYQKIK(19)-KHPTPR(1)	4	2.86e-13				n.a.
1771	PTA(419)-PTA(639)	TVKAAAICAER(3)-SKAPNSPVAGR(2)	4	3.18e-13				n.a.
1772	YIFE(49)-YIFE(2)	HGYAFNELDLGKR(12)-AESFTTTNR(1)	4	3.69e-13				n.a.
1773	PURA(293)-PURA(332)	VGAGPFPTELFDETGEFLCKQGNEFGATTGR(20)-AVQLNSLSGFCLTKLDVLDGLK(14)	4	4.14e-13		√	√	12.3482
1774	EFTS(182)-EFTS(247)	HIAMHVAASKPEFIKPEDVSAEVVEK(15)-TVGQLLKEHNAEVTGFIR(7)	4	9.79e-13		√	√	12.3221
1775	PTA(163)-PTA(419)	NSFGGAKNTNITGVIVNK(7)-TVKAAAICAER(3)	4	1.32e-12				n.a.
1776	IF2(184)-IF2(194)	EQEAAELKR(8)-KLEEEAR(1)	4	2.48e-12				n.a.
1777	MIND(163)-MIND(260)	ILGILASKSR(8)-FIEEEKK(6)	4	1.46e-11				n.a.
1778	SYM(552)-SYM(133)	EEVKAAAAPVTGPLADDPIQETITFDDFAK(4)-TISQLYDPEKGMFLPDR(10), QVEALVEASKEEVKAAAAPVTGPLADDPIQETITFDDFAK(14)-TISQLYDPEKGMFLPDR(10)	4	2.55e-11				n.a.
1779	RHLB(150)-RHLB(177)	LIDYAKQNHINLGAIQVVVLDEADR(6)-MYDLGFIKDIR(8)	4	3.22e-11				n.a.
1780	RS5(126)-RS5(156)	AVLEVAGVHNVLAKAYGSTNPINVVR(14)-ATIDGLENMNSPEMVAAKR(18)	4	3.75e-11		√		25.7541
1781	SYL(735)-SYL(813)	QTFNTAIAAIMELMNKLAK(16)-AKITVPVDATEEQVR(2)	4	1.21e-10		√	√	21.5414
1782	NLPD(280)-NLPD(368)	VIETFGASEGGNKGIDIAGSK(13)-GKSVNPLR(2)	4	1.33e-10				n.a.
1783	YAAA(9)-YAAA(55)	MLILISPAKTLDYQSPLTTTR(9)-ISDKLAGINAAR(4)	4	2.79e-10				n.a.
1784	GHRA(73)-GHRA(170)	AVFALGAGVDSILSKLQAHPEMLNPSVPLFR(15)-KSWPGVQSFAGR(1)	4	6.8e-10				n.a.
1785	AMPN(852)-AMPN(1)	AALEQLKGLENLSGDLYEK(7)-MTQQPQAK(1)	4	7.42e-10				n.a.
1786	EFTS(281)-EFTS(52)	VETDFAAEVAAMSKQS(14)-KAGNVAADGVIK(1)	4	8.64e-10		√		25.9297
1787	SYY(230)-SYY(238)	LHQNQVFGLTVPLITKADGTK(16)-FGKTEGGAVWLDPK(3)	4	1.06e-09		√	√	10.0773
1788	TYPA(115)-TYPA(423)	KAFAYGLKPIVVINK(1)-KGDLKNMNPDGK(1)	4	1.58e-09				n.a.
1789	SYK1(2)-SYK1(25)	SEQHAQGADAVVDLNNELK(1)-EKLANLR(2)	4	5.74e-09				n.a.
1790	MIND(260)-MIND(94)	FIEEEKK(6)-DKDALTR(2)	4	7.48e-09				n.a.
1791	YIHD(34)-YIHD(77)	LAKESGFDGELADLTDDILIYHLK(3)-DYEEDFKTALLR(7)	4	9.23e-09				n.a.
1792	OBG(141)-OBG(131)	QKTNGTPGDKR(2)-FKSSVNR(2)	4	9.54e-09		√	√	15.5147
1793	DKSA(8)-DKSA(139)	KTSSLSILAIAGVEPYQEKPGEEYMNEAQLAHFR(1)-PTADLCIDCKTLAEIR(10)	4	2.3e-08		√	√	18.7308
1794	EX3(255)-EX3(218)	SMEKPSDHAPVWATFR(4)-SKGFDDNR(2)	4	2.4e-08		√	√	13.1146
1795	IF2(42)-IF2(1)	SADDSVSAQEKQTLIDHLNQK(11)-MTDVTIK(1)	4	2.45e-08				n.a.
1796	YACC(98)-YACC(101)	DLSGIGIPVAKK(11)-CKALAR(2)	4	3.02e-08				n.a.
1797	MDAB(107)-MDAB(102)	KYGSGGLVQGK(1)-KDPSK(1)	4	4.27e-08		√	√	11.9393
1798	DEOC(13)-DEOC(2)	ALKLMDLTTLNDDDTDEK(3)-TDLKASSLR(1)	4	1.31e-07		√	√	16.9319
1799	YIFE(49)-YIFE(15)	HGYAFNELDLGKR(12)-YFDNKHYPR(5)	4	1.36e-07				n.a.
1800	DAPD(241)-DAPD(254)	VPAGSVVVSGNLPSKDGK(15)-YSLYCAVIVKK(10)	4	1.64e-07				n.a.
1801	LPLA(127)-LPLA(134)	NDLVVKTVEGDR(6)-KVSGSAYR(1)	4	2e-07		√	√	8.84583
1802	ARCA(195)-ARCA(187)	ELKPHDR(3)-AELLKK(5)	4	2.36e-07				n.a.
1803	CDD(208)-CDD(168)	SHMPYSKSPSGVALECK(7)-DYLPDAFGPKDLEIK(10)	4	3.01e-07		√	√	16.5753
1804	SYV(3)-SYV(644)	MEKTYNPQDIEQPLYEHWEK(3)-NFCNKLWNASR(5)	4	3.18e-07				n.a.
1805	HSLU(51)-HSLU(2)	HEVTPKNILMIGPTGVGK(6)-SEMTPR(1)	4	4.26e-07		√	√	17.2344
1806	ELAB(2)-ELAB(66)	SNQFGDTR(1)-AKQAVYR(2)	4	4.67e-07				n.a.
1807	ARCA(178)-ARCA(195)	AMLHFCENPGKIQSR(11)-ELKPHDR(3)	4	5.32e-07				n.a.
1808	NUOCD(161)-NUOCD(167)	IMMPQTWKGHPLR(8)-KDYPAR(1)	4	7.19e-07				n.a.
1809	CH60(80)-CH60(390)	EVASKANDAAGDGTTTATVLAQAIITEGLK(5)-VGAATEVEMKEK(10)	4	1.19e-06		√	√	13.7526
1810	SYQ(59)-SYQ(2)	SICLNFGIAQDYKGQCNLR(13)-SEAEAR(1)	4	1.27e-06				n.a.
1811	MUKB(230)-MUKB(1246)	KAFQDMEAALR(1)-KTIQR(1)	4	2.15e-06				n.a.
1812	EFG(370)-EFG(375)	IVQMHANKR(8)-EEIKEVR(4)	4	2.15e-06		√	√	15.896
1813	SYI(1)-SYI(5)	MSDYKSTLNLPETGFPMR(1)-SDYKSTLNLPETGFPMR(4)	4	2.31e-06				n.a.
1814	YEIR(215)-YEIR(269)	KGLAALSLPEHQR(1)-VKGVLR(2)	4	3.42e-06				n.a.
1815	SYR(126)-SYR(381)	QTIVVDYSAPNVAKEMHVGHLR(14)-DGKPFKTR(6)	4	3.99e-06		√	√	15.6921
1816	THII(349)-THII(265)	TMPEYCGVISKSPTVK(11)-IDDGQMGVILKR(11)	4	4.02e-06				n.a.
1817	POTD(343)-POTD(200)	NGEWQNDVGAASSIYEEYYQKLK(21)-EIEAAYNELKK(10)	4	4.15e-06		√	√	9.82846
1818	SKP(82)-SKP(75)	TKLEKDVMAQR(2)-LQSMKAGSDR(5)	4	6.51e-06		√	√	8.88841
1819	AHPC(27)-AHPC(9)	NGEFIEITEKDTEGR(10)-IKPFKNQAFK(2)	4	6.81e-06				n.a.
1820	G6PI(17)-G6PI(65)	NINPTQTAAWQALQKHFDEMK(15)-ITEETLAKLQDLAK(8)	4	1.01e-05		√	√	10.4035
1821	YJJK(45)-YJJK(13)	IGVLGLNGAGKSTLLR(11)-VGKVVPPK(3)	4	1.14e-05		√	√	11.7003
1822	YDGH(253)-YDGH(234)	VEELNKATAAMMVPFDSIK(6)-FFETQSSKGGR(8)	4	1.34e-05				n.a.
1823	FKBA(110)-FKBA(269)	VKSSAQAK(2)-AADSAKK(6)	4	1.65e-05				n.a.
1824	GPMA(128)-GPMA(146)	GFAVTPPELTKDDERYPGHDPR(11)-LSEKELPLTESLALTIDR(4)	4	1.7e-05		√	√	11.8719
1825	RRF(1)-RRF(7)	MISDIR(1)-KDAEVR(1)	4	1.7e-05		√	√	10.4479
1826	IMDH(203)-IMDH(207)	DFQKAER(4)-KPNACK(1)	4	1.96e-05				n.a.
1827	RL22(16)-RL22(42)	SSAQKVR(5)-KAAVLVK(1)	4	1.97e-05		√	√	8.23275
1828	AK3(257)-AK3(280)	IDEIAFAEAAEMATFGAKVLHPATLLPAVR(18)-SDIPVFVGSSKDPR(11)	4	2.27e-05		√	√	14.1874
1829	SYGB(282)-SYGB(18)	FLAVPAEALVYTMKGDQK(14)-TFLVEIGTEELPPKALR(14)	4	2.51e-05				n.a.
1830	DAPD(263)-DAPD(85)	GKVGINELLR(2)-YFDKVPMK(4)	4	2.63e-05				n.a.
1831	GLMU(446)-GLMU(454)	VPQTQKEGWR(6)-RPVKK(4)	4	2.84e-05		√		22.2253
1832	TOP1(836)-TOP1(302)	TKQQYVSSEK(2)-LGFGVKK(6)	4	3.5e-05				n.a.
1833	RELE(13)-RELE(17)	ALKEWR(3)-KLGSTVR(1)	4	4.95e-05		√	√	5.45837
1834	IF2(141)-IF2(194),IF2(149)-IF2(194)	EAAEQAKR(7)-KLEEEAR(1)	4	5.33e-05				n.a.
1835	EFTU1(314)-EFTU1(5),EFTU2(314)-EFTU2(5)	FESEVYILSKDEGGR(10)-EKFER(2)	4	7.48e-05		√		44.2056
1836	CYSB(1)-CYSB(2)	MKLQQLR(1)-MKLQQLR(2)	4	0.00017				n.a.
1837	RS10(11)-RS10(1)	LKAFDHR(2)-MQNQR(1)	4	0.000176		√	√	9.99591
1838	ARLY(101)-ARLY(2)	VGQLGKK(6)-ALWGGR(1)	4	0.00021				n.a.
1839	PHNA(109)-PHNA(78)	SEFVKK(5)-IGTKVK(4)	4	0.000295				n.a.
1840	RPOC(325)-RPOC(321)	PLKSLADMIK(3)-AITGSNKR(7)	4	0.000328		√	√	11.0216
1841	ENO(62)-ENO(198)	FLGKGVTK(4)-VLKAK(3)	4	0.000376		√	√	19.5088
1842	SECA(625)-SECA(633)	PGEAIEHPWVTKAIANAQR(12)-KVESR(1)	4	0.00105		√	√	12.0457
1843	PPIB(77)-PPIB(19)	EPIKNEANNGLKNTR(12)-TFDDKAPETVK(5)	4	0.00123		√	√	11.4349
1844	ISCA(67)-ISCA(96)	VVVDGKSLQFLDGTQLDFVK(6)-FTNPNVKDECGCGESFHV(7)	3	6.22e-24		√		22.7822
1845	ACRA(109)-ACRA(161)	EGSDIEAGVSLYQIDPATYQATYDSAKGDLAK(27)-QEYDQALADAQQANAAVTAAKAAVETAR(21)	3	1.57e-22		√	√	7.84437
1846	FABZ(2)-FABZ(136)	TTNTHTLQIEEILELLPHR(1)-GVALVDGKVVCEATMMCAR(8)	3	1.49e-19				n.a.
1847	DDLB(243)-DDLB(129)	YLSDETQYFCPAGLEASQEANLQALVLKAWTTLGCK(28)-GLSDKQLAEISALGLPVIVKPSR(5)	3	3.1e-19		√	√	15.8503
1848	YGGE(241)-YGGE(179)	ADAAPVSAQETYEQAAIQFDDQVDVVFQLEPVDQQPAKTPAAQ(38)-KLGPVYSVR(1)	3	4.15e-19				n.a.
1849	G6PI(2)-G6PI(80)	MKNINPTQTAAWQALQK(2)-ECDLAGAIKSMFSGEK(9)	3	6.78e-19		√	√	11.5659
1850	AHPF(103)-AHPF(16)	FAGSPLGHEFTSLVLALLWTGGHPSKEAQSLLEQIR(26)-AYLEKLTKPVELIATLDDSAK(5)	3	1.57e-17		√	√	14.3354
1851	COABC(215)-COABC(385)	YISNHSSGKMGFAIAAAAAR(9)-KELLGQLLLDEIVTR(1)	3	2.86e-17				n.a.
1852	HNS(83)-HNS(32)	EMLIADGIDPNELLNSLAAVKSGTK(21)-ECTLETLEEMLEKLEVVVNER(13)	3	8.32e-17				n.a.
1853	RELA(691)-RELA(728)	DITTILANEKVNVLGVASR(10)-VLGKLNQVPDVIDAR(4)	3	1.56e-16				n.a.
1854	THIL(226)-THIL(2)	DLANSAIDLSDGLISDLGHIVKASDCGAR(22)-ACGEFSLIAR(1)	3	5.39e-16				n.a.
1855	UDP(235)-UDP(3)	TQQEIPNAETMKQTESHAVK(12)-SKSDVFHLGLTK(2)	3	1.7e-15		√	√	11.4576
1856	ODP1(327)-ODP1(412)	LIQLMNETVDGDYQTFKSK(17)-KMNMDGVR(1)	3	2.7e-15		√	√	20.6375
1857	PURA(50)-PURA(19)	YQGGHNAGHTLVINGEKTVLHLIPSGILR(17)-GKIVDLLTER(2)	3	1.12e-13		√	√	10.22
1858	YCDY(35)-YCDY(1)	EGKLAANWPLEQDELLTR(3)-MNEFSILCR(1)	3	2.58e-13				n.a.
1859	TATA(52)-TATA(41)	QDKTSQDADFTAK(3)-KAMSDDEPK(1)	3	4.92e-13				n.a.
1860	PT1(340)-PT1(1)	TMDIGGDKELPYMNFPK(8)-MISGILASPGIAFGK(1)	3	5.7e-13		√		54.8854
1861	THRC(194)-THRC(7)	LFCTLGGNIETVAIDGDFDACQALVKQAFDDEELK(26)-LYNLKDHNEQVSFAQAVTQGLGK(5)	3	1.95e-12		√	√	14.2115
1862	AMPN(748)-AMPN(286)	DALMQEYDDKWHQNGLVMDKWFILQATSPAANVLETVR(20)-TDTATDKDYLDIER(7)	3	3.91e-12		√	√	11.6906
1863	PMBA(243)-PMBA(446)	LSTMKAPVIFANEVATGLFGHLVGAIAGGSVYR(5)-SNIQCGSVLLPEMKIAGQ(14)	3	7.62e-12				n.a.
1864	RBSA(432)-RBSA(241)	KEIYQLINQFK(1)-KLEDQYPHLDK(1)	3	2.28e-11				n.a.
1865	RS2(45)-RS2(28)	VHIINLEKTVPMFNEALAELNK(8)-MKPFIFGAR(2)	3	2.69e-11		√	√	9.56612
1866	EFG(323)-EFG(23)	HASDDEPFSALAFKIATDPFVGNLTFFR(14)-NIGISAHIDAGKTTTTER(12)	3	2.74e-11		√	√	19.4739
1867	OPGG(94)-OPGG(189)	LEFYHQGMYFDTPVKINEVTATAVK(15)-FKEFWIER(2)	3	3.92e-11				n.a.
1868	RSUA(94)-RSUA(5)	YFMLNKPQGYVCSTDDPDHPTVLYFLDEPVAWKLHAAGR(33)-LDKFIAQQLGVSR(3)	3	4.83e-11				n.a.
1869	TALA(40)-TALA(307)	HYHPQDATTNPSLLLKAAGLSQYEHLIDDAIAWGK(16)-KLEDLLAAK(1)	3	5.08e-11				n.a.
1870	RNE(235)-RNE(189)	QDIGEILIDNPKVLELAR(12)-LKHWEAIK(2)	3	6.19e-11		√		24.7097
1871	MIND(206)-MIND(163)	IKLVGVIPEDQSVLR(2)-ILGILASKSR(8)	3	1.12e-10		√	√	20.6837
1872	FKBA(90)-FKBA(76)	LDKDQLIAGVQDAFADKSK(17)-LDKDQLIAGVQDAFADK(3)	3	1.4e-10		√	√	14.8085
1873	OPDA(382)-OPDA(379)	KDVDVWHPDVR(1)-IYGITAKER(7)	3	1.84e-09				n.a.
1874	PUR9(455)-PUR9(455)	VYSAKIAGIK(5)-VYSAKIAGIK(5)	3	3e-09				n.a.
1875	DBHA(22)-DBHA(13)	TQAKAALESTLAAITESLK(4)-TQLIDVIAEKAELSK(10)	3	3.5e-09		√	√	13.1603
1876	CARB(899)-CARB(366)	EVVLPFNKFPGVDPLLGPEMR(8)-FNFEKFAGANDR(5)	3	5.07e-09		√	√	12.4406
1877	TOP1(631)-TOP1(627)	CKTTINLVPENEVLNVLEGEDAETNALR(2)-TASTGVFLGCSGYALPPKER(18)	3	1.04e-08				n.a.
1878	HSLU(24)-HSLU(118)	HIIGQDNAKR(9)-VQAIEKNR(6)	3	1.14e-08		√		29.7094
1879	PROX(330)-PROX(268)	AHQQQFDGWVNEALAAQK(18)-AWAEKNPAAAK(5)	3	1.26e-08		√	√	8.98738
1880	GPMA(100)-GPMA(18)	HYGALQGLNKAETAEK(10)-HGESQWNKENR(8)	3	1.7e-08		√	√	11.35
1881	ODP2(396)-ODP2(366)	VDFSKFGEIEEVELGR(5)-EDVQAYVKEAIK(8)	3	1.74e-08				n.a.
1882	CH60(42)-CH60(28)	NVVLDKSFGAPTITK(6)-GVNVLADAVKVTLGPK(10)	3	2.23e-08		√	√	19.4655
1883	IMDH(88)-IMDH(110)	KHESGVVTDPQTVLPTTTLR(1)-EVKELTER(3)	3	2.4e-08				n.a.
1884	CLPB(250)-CLPB(163)	VLALDMGALVAGAKYR(14)-KYTIDLTER(1)	3	2.96e-08		√	√	16.1971
1885	CYSB(35)-CYSB(1)	YIVEVVNHNLNVSSTAEGLYTSQPGISKQVR(28)-MKLQQLR(1)	3	3.26e-08				n.a.
1886	ATPF(69)-ATPF(66)	AKAEAQVIIEQANK(2)-ASATDQLKK(8)	3	3.57e-08		√	√	5.18391
1887	DBHA(67)-DBHA(86)	NPQTGKEIK(6)-ALKDAVK(3)	3	4.24e-08				n.a.
1888	STPA(32)-STPA(117)	EFSIDVLEEMLEKFR(13)-TPKPIAQALAEGK(3)	3	4.4e-08				n.a.
1889	PCKA(262)-PCKA(453)	TTLSTDPKR(8)-ISIKDTR(4)	3	4.5e-08		√	√	13.269
1890	CH60(105)-CH60(441)	ANDAAGDGTTTATVLAQAIITEGLKAVAAGMNPMDLK(25)-GQNEDQNVGIKVALR(11)	3	4.64e-08		√	√	10.3113
1891	RELA(11)-RELA(164)	SAHINKAGEFDPEK(6)-EVKDAPEDER(3)	3	6.72e-08				n.a.
1892	ATPA(501)-ATPA(388)	LKGILDSFK(2)-KLSGGIR(1)	3	7.1e-08		√	√	14.73
1893	YQJD(63)-YQJD(48)	LGETGDAIAKQTR(10)-AEQALKQSR(6)	3	8.65e-08				n.a.
1894	GNSA(31)-GNSA(7)	NTGKEVSEIR(4)-MNIEELKK(7)	3	1.04e-07		√	√	11.2756
1895	SODM(87)-SODM(206)	NNAGGHANHSLFWKGLK(14)-FAAKK(5)	3	1.15e-07		√	√	15.3005
1896	RAIA(80)-RAIA(2)	HEDMYTAINELINKLER(14)-TMNITSK(1)	3	1.5e-07		√	√	17.7709
1897	EFG(389)-EFG(354)	AGDIAAAIGLKDVTTGDTLCDPDAPIILER(11)-VYSGVVNSGDTVLNSVKAAR(17)	3	1.61e-07		√	√	10.3649
1898	HSLU(24)-HSLU(2)	HIIGQDNAKR(9)-SEMTPR(1)	3	1.71e-07		√	√	16.0996
1899	DACB(305)-DACB(112)	KSDNMIADTVFR(1)-FGADPTLKR(8)	3	4.12e-07		√	√	19.0684
1900	TIG(327)-TIG(37)	FGGNEKQALELPR(6)-SELVNVAKK(8)	3	4.51e-07		√		36.6643
1901	CLPB(476)-CLPB(522)	ASLSGTQTIKAELEQAK(10)-QLEAATQLEGKTMR(11)	3	5.63e-07				n.a.
1902	NUSA(224)-NUSA(239)	IEVPEIGEEVIEIKAAAR(14)-IAVKTNDK(4)	3	8.8e-07				n.a.
1903	PEPB(57)-PEPB(1)	IDGLGIKHVQLSGEGWDADR(7)-MTEAMK(1)	3	1.34e-06				n.a.
1904	FUMC(430)-FUMC(426)	AHKEGLTLK(3)-AAEIAKK(6)	3	1.39e-06		√	√	5.90757
1905	PROQ(140)-PROQ(149)	KPRPTTPR(1)-KEGAER(1)	3	1.4e-06				n.a.
1906	PARC(155)-PARC(2)	YSELLLSELGQGTADWVPNFDGTLQEPKMLPAR(28)-SDMAER(1)	3	1.78e-06				n.a.
1907	IF2(184)-IF2(125)	EQEAAELKR(8)-EAEESAKR(7)	3	1.8e-06				n.a.
1908	EFPL(40)-EFPL(51)	GAATLYKMR(7)-TGLKVEER(4)	3	1.97e-06				n.a.
1909	DYR(32)-DYR(38)	VIGMENAMPWNLPADLAWFKR(20)-NTLNKPVIMGR(5)	3	2.08e-06		√	√	9.93407
1910	AHPF(268)-AHPF(1)	TEGQKLAGALK(5)-MLDTNMK(1)	3	3.23e-06		√		75.1165
1911	CH60(42)-CH60(34)	NVVLDKSFGAPTITK(6)-VTLGPKGR(6)	3	3.27e-06		√	√	18.0098
1912	UVRA(197)-UVRA(159)	KHTIEVVVDR(1)-KGEHTK(1)	3	3.34e-06		√	√	4.12109
1913	CISY(274)-CISY(295)	TAGSSGANPFACIAAGIASLWGPAHGGANEAALKMLEEISSVK(34)-DKNDSFR(2)	3	3.4e-06		√	√	9.44139
1914	IF2(173)-IF2(665)	NAQAEKAR(6)-EVKLAR(3)	3	4e-06				n.a.
1915	ACSA(617)-ACSA(2)	KIAAGDTSNLGDTSTLADPGVVEK(1)-SQIHK(1)	3	5.45e-06				n.a.
1916	RLUB(49)-RLUB(97)	VEVTPGLKIR(8)-LPKLR(3)	3	5.85e-06		√		24.148
1917	DHAS(232)-DHAS(244)	SGELPVDNFGVPLAGSLIPWIDKQLDNGQSR(23)-EEWKGQAETNK(4)	3	6.48e-06		√	√	11.402
1918	ODP1(327)-ODP1(404)	LIQLMNETVDGDYQTFKSK(17)-GYGMGDAAEGKNIAHQVK(11)	3	6.98e-06		√	√	8.61492
1919	RL28(26)-RL28(54)	SHALNATKR(8)-VSAKGMR(4)	3	7.37e-06		√		22.5928
1920	SYW(198)-SYW(55)	MSKSDDNR(3)-QDAQKLR(5)	3	9.3e-06				n.a.
1921	RL27(19)-RL27(24)	DSEAKR(5)-LGVKR(4)	3	9.86e-06		√	√	11.8122
1922	FTSH(148)-FTSH(203)	MLTEDQIKTTFADVAGCDEAKEEVAELVEYLR(8)-TLLAKAIAGEAK(5)	3	1.05e-05		√	√	7.70733
1923	ARGD(402)-ARGD(2)	FAHAVAKVVGA(7)-AIEQTAITR(1)	3	1.28e-05				n.a.
1924	ENGB(50)-ENGB(183)	SSALNTLTNQKSLAR(11)-KQGVDK(1)	3	1.33e-05				n.a.
1925	HSLU(223)-HSLU(2)	DAMKLLIEEEAAK(4)-SEMTPR(1)	3	1.42e-05		√	√	20.202
1926	OBG(31)-OBG(131)	YIPKGGPDGGDGGDGGDVWMEADENLNTLIDYR(4)-FKSSVNR(2)	3	1.79e-05		√	√	18.9276
1927	ODO1(54)-ODO1(54)	STFQQLPGTGVKPDQFHSQTR(12)-STFQQLPGTGVKPDQFHSQTR(12)	3	1.79e-05				n.a.
1928	DEOD(54)-DEOD(238)	GMLGFTGTYKGR(10)-IALESVLLGDKE(11)	3	2.77e-05		√	√	13.1249
1929	MSRA(7)-MSRA(2)	KHLVSPADALPGR(1)-SLFDK(1)	3	2.83e-05		√	√	9.50961
1930	YFIF(63)-YFIF(141)	KWEDSPWR(1)-FKEALR(2)	3	2.92e-05				n.a.
1931	IHFA(15)-IHFA(66)	AEMSEYLFDKLGLSK(10)-NPKTGEDIPITAR(3)	3	3.54e-05		√		48.3146
1932	CLPX(192)-CLPX(366)	KSDNPSITR(1)-KTGAR(1)	3	4.64e-05				n.a.
1933	YIFE(80)-YIFE(2)	VWSKYMTR(4)-AESFTTTNR(1)	3	4.7e-05				n.a.
1934	HSLU(15)-HSLU(2)	EIVSELDKHIIGQDNAK(8)-SEMTPR(1)	3	4.85e-05		√	√	16.168
1935	HTPG(229)-HTPG(298)	INKAQALWTR(3)-HGLKLYVQR(4)	3	5.97e-05		√	√	20.3978
1936	GYRA(276)-GYRA(2)	LIEKIAELVK(4)-SDLAR(1)	3	6.03e-05				n.a.
1937	LIPB(1)-LIPB(95)	MYQDK(1)-KLGVR(1)	3	6.93e-05				n.a.
1938	EFTS(214)-EFTS(24)	EIAEKMVEGR(5)-TGAGMMDCKK(9)	3	0.000108		√		24.8107
1939	CH10(1)-CH10(15)	MNIRPLHDR(1)-KEVETK(1)	3	0.000111		√	√	13.9674
1940	HEM2(292)-HEM2(213)	FAALAGAIDEEKVVLESLGSIK(12)-EAAGSALKGDR(8)	3	0.000115		√	√	16.1336
1941	YHES(569)-YHES(562)	LEKEMEK(3)-KEIAR(1)	3	0.000116				n.a.
1942	YBAM(2)-YBAM(53)	SLENAPDDVK(1)-DDEAEK(6)	3	0.000124				n.a.
1943	EFTU2(391)-EFTU2(300)	TVGAGVVAKVLS(9)-PGTIKPHTK(5)	3	0.000128		√	√	12.1388
1944	THII(321)-THII(14)	LIDNVSDTLILRPLISYDKEHIINLAR(19)-LFPEITIKSQSVR(8)	3	0.000141				n.a.
1945	RCSB(1)-RCSB(125)	MNNMNVIIADDHPIVLFGIR(1)-ALAALQKGK(7)	3	0.000175				n.a.
1946	ATPA(118)-ATPA(426)	VVNTLGAPIDGKGPLDHDGFSAVEAIAPGVIER(12)-QLDHGQKVTELLK(7)	3	0.000182		√		40.4115
1947	HNS(57)-HNS(2)	KLQQYR(1)-SEALK(1)	3	0.000188				n.a.
1948	FABI(17)-FABI(201)	ILVTGVASKLSIAYGIAQAMHR(9)-TLAASGIKDFR(8)	3	0.000207		√	√	20.7015
1949	PROQ(107)-PROQ(149)	KQLEEAKAR(7)-KEGAER(1), QLEEAKAR(6)-KEGAER(1)	3	0.000207				n.a.
1950	IDH(142)-IDH(166)	YYQGTPSPVKHPELTDMVIFR(10)-ENSEDIYAGIEWKADSADAEK(13)	3	0.00023		√		42.8189
1951	EFG(187)-EFG(249)	LGANPVPLQLAIGAEEHFTGVVDLVKMK(26)-YLGGEELTEAEIKGALR(13)	3	0.000249		√	√	9.68988
1952	RAIA(102)-RAIA(87)	AATSVKDANFVEEVEEE(6)-QLNKLQHK(4)	3	0.000267		√		25.996
1953	SYH(53)-SYH(119)	LPIVEQTPLFKR(11)-HERPQKGR(6)	3	0.00027		√		26.8785
1954	OSMY(192)-OSMY(125)	AVDGVKSVK(6)-DAKEGSVK(3)	3	0.000384				n.a.
1955	RNB(501)-RNB(512)	KYGDMINHR(1)-LLKAVIK(3)	3	0.000405		√	√	16.7654
1956	FUR(148)-FUR(117)	EDEHAHEGK(9)-EIAAKHGIR(5)	3	0.000412				n.a.
1957	TATA(77)-TATA(86)	QADTNQEQAKTEDAK(10)-RHDKEQV(4)	3	0.000424				n.a.
1958	FRDA(281)-FRDA(121)	NKYMELGPR(2)-FGGMKIER(5)	3	0.000528		√	√	8.61201
1959	LON(509)-LON(1)	HLLPKQIER(5)-MNPER(1)	3	0.000639				n.a.
1960	RPOB(260)-RPOB(279)	GETASFDIEANGKVYVEK(13)-QLEKDDVK(4)	3	0.000737		√	√	13.0041
1961	DEF(151)-DEF(158)	LFMDYLSPLKQQR(10)-QKVEK(2)	3	0.000784		√	√	10.2279
1962	GRPE(66)-GRPE(2)	VKAEMENLR(2)-SSKEQK(1)	3	0.000897				n.a.
1963	GLRX2(71)-GLRX2(53)	YMPESMDIVHYVDKLDGKPLLTGK(14)-QVPILQKDDSR(7)	3	0.000905		√	√	12.8698
1964	KDSA(154)-KDSA(60)	KPQFVSPGQMGNIVDKFK(16)-ASFDKANR(5)	3	0.00107		√	√	14.7892
1965	SYV(861)-SYV(940)	LESITVLPADDKGPVSVTK(12)-AKLIEQQAVIAAL(2)	3	0.00129				n.a.
1966	GYRA(42)-GYRA(2)	DGLKPVHR(4)-SDLAR(1)	3	0.00153				n.a.
1967	GLMM(5)-GLMM(305)	KYFGTDGIR(1)-AKVGDR(2)	3	0.0016				n.a.
1968	GYRA(573)-GYRA(567)	IKEEDFIDR(2)-GKSAAR(2)	3	0.00164				n.a.
1969	DNAK(577)-DNAK(556)	TAIESALTALETALKGEDK(15)-QVEEAGDKLPADDK(8), TAIESALTALETALKGEDK(15)-KQVEEAGDKLPADDK(9)	3	0.00224		√		27.6811
1970	RLMB(2)-RLMB(75)	SEMIYGIHAVQALLER(1)-VKPGR(2)	3	0.00247				n.a.
1971	APT(23)-APT(87)	SIQDYPKPGILFR(7)-KPGKLPR(1)	3	0.00264		√	√	19.8463
Summary
		#Cross-links identified from E. coli ribo-free lysates
		Inter-molecular		Intra-molecular			Total
Total		385		1586			1971
Structure available		36		941			977
Compatible		25		795			820
%Compatible		0.694444		0.844846			0.839304
Filtering criteria: FDR < 5%, E-value < 0.01, spectral count ≥ 3. Identified cross-links are sorted and assigned as described in Figure 4—source data 1.
