# Supplementary material for: Trifunctional cross-linker for mapping protein-protein interaction networks and comparing protein conformational states
Source: eLife journal article supplement (doi:10.7554/elife.12509), 2016-03-03
Supplement: supp [file elife-12509-supp-v1.zip › elife_poa_e12509_Figure_5_source_data_3.xlsx]

## Sheet: Sheet1
Figure 5—source data 3. CXMS analysis of C. elegans whole-cell lysates
No.	Protein1-Protein2	Peptide1-Peptide2	#Spectra	Best E-value
Inter-molecular Cross-links
1	F11C3.3(79)-F09F7.2a(94)	ELVQEMNPPKFEK(10)-VFDKEETGK(4)	73	5.41e-11
2	C42D8.2a(1388)-C15B12.7a(498),C42D8.2a(1388)-C15B12.7b(540)	KIQSEDYSAYQIER(1)-KVVDGK(1)	34	1.16e-07
3	T05E11.1(188)-K02B2.5(62)	TIAECLADELINAAKGSSNSYAIK(15)-EVITYKLITPSVVSER(6)	31	9.35e-20
4	C06H2.1(61)-H28O16.1d(2)	KALPAHSAVLDSLQK(1)-AGASGSEVSK(1)	31	9.39e-14
5	C36E6.3(140)-F09F7.2a(2),C36E6.5(140)- F09F7.2a(2)	AMYKGKPPIEGGEVDYK(4)-APPSQDVLK(1)	30	7.85e-13
6	Y48B6A.2(28)-Y106G6H.3a(2)	KLEVAQHSR(1)-APAAKPQVK(1)	29	2.81e-16
7	B0035.9(80)-B0035.10(80)*	KTVTAMDVVYALK(1)-EIAQDFKTDLR(7)	22	4.66e-14
8	F46F11.5(37)-C17H12.14(52)	QAKQEAQAEVEK(3)-QKIMEFFEK(2)	21	4.14e-10
9	K09F5.2(1390)-C15B12.7a(498),K09F5.2(1390)-C15B12.7b(540)	KILSEDYSAHQIER(1)-KVVDGK(1)	20	1.26e-09
10	K12F2.1(811)-F09F7.2a(2)	SYLAKAEVR(5)-APPSQDVLK(1)	20	2.01e-08
11	C16A3.9(27)-ZC434.2(73)	SVPSWQKMTAEEVQDQIVK(7)-AFHKIHPALVR(4)	19	9.75e-09
12	K07H8.6a(98)-C04F6.1(1191),K07H8.6a(98)-F59D8.1(1191),K07H8.6a(98)-F59D8.2(1191)	FATSQQESNSMKMLPFER(12)-EYKGIPEYELLIK(3)	18	1.6e-11
13	B0035.8(32)-B0035.7(38)*	KESYSVYIYR(1)-KGNYAQR(1)	18	5.72e-11
14	F09F7.2a(77)-F11C3.3(735),F09F7.2a(77)-R06C7.10(733)	EKEQGTYADFYEGLK(2)-YAILAAKEAK(7)	17	3.92e-15
15	F09F7.2a(39)-K12F2.1(811)	AAGLKPTQAMVTK(5)-SYLAKAEVR(5)	17	1.14e-09
16	Y48B6A.2(28)-C09D4.5(187)	KLEVAQHSR(1)-KISQSEK(1)	16	3.83e-09
17	Y110A7A.14(176)-C36B1.4(49)	ATCIGSNHQAAVTLLKQEYK(16)-KSIPALQDDR(1)	15	1.17e-14
18	F27C1.7a(67)-H28O16.1d(2),F27C1.7b(88)-H28O16.1d(2)	KFQEFVLDPTLK(1)-AGASGSEVSK(1)	15	2.66e-11
19	F02E8.1(255)-H28O16.1d(2)	RIDYLKETEESK(6)-AGASGSEVSK(1), IDYLKETEESK(5)-AGASGSEVSK(1)	15	1.15e-08
20	T05H4.12(35)-H28O16.1d(2)	EIAKNAGNLANSDPAVK(4)-AGASGSEVSK(1)	14	2.81e-16
21	T05H4.12(48)-H28O16.1d(2)	NAGNLANSDPAVKK(13)-AGASGSEVSK(1)	14	2.99e-13
22	F27C1.7a(92)-H28O16.1d(2),F27C1.7b(113)-H28O16.1d(2)	TAIEAISTKLGLTK(9)-AGASGSEVSK(1)	14	5.85e-12
23	K04D7.1(145)-D1007.6(125)	LWNTLAQCKYTITDDCHTDWVSTVR(9)-TEKVTEAGPGGAPVYR(3)	13	1.41e-29
24	F25H2.10(274)-C37A2.7(61)	AFIADPSKFAAAAPAAAAAPAAAAPAAK(8)- VKLSSVPSGGSAPAAAAPSGGAAPK(2)	13	4.2e-29
25	C16A3.9(43)-Y106G6H.3a(2)	KGLRPSQIGVILR(1)-APAAKPQVK(1)	13	2.23e-11
26	T05H4.12(103)-C06H2.1(107)	VDSAVQSALEGQTLASLLEGVKK(22)-IKLHEVK(2)	13	5.06e-11
27	C42D8.2a(1351)-C15B12.7a(498),C42D8.2a(1351)-C15B12.7b(540),K09F5.2(1353)-C15B12.7a(498),K09F5.2(1353)-C15B12.7b(540)	DCSEEPTFAVLSKK(13)-KVVDGK(1)	13	7.33e-08
28	K05B2.3(128)-F10C1.2b(130)	SAKDLIADSDKER(3)-IKYSESLSTAR(2)	12	2.86e-14
29	B0035.8(83)-B0035.7(38)*	LAHYNKR(6)-KGNYAQR(1)	12	3.52e-10
30	C36E6.3(136)-F09F7.2a(2),C36E6.5(136)-F09F7.2a(2)	RGEPLDEDEVKAMYK(11)-APPSQDVLK(1), GEPLDEDEVKAMYK(10)-APPSQDVLK(1)	11	1.22e-11
31	F01F1.8a(534)-F54A3.3(75)	AGMTNLKQPQPE(7)-EITVKHPAAK(5)	10	2.73e-09
32	T18D3.4(79)-F09F7.2a(94)	DVVQEMNPPKFEK(10)-VFDKEETGK(4)	10	3.16e-07
33	F52D10.3a(70)-F46F11.1a(266),M117.2a(70)-F46F11.1a(266)	VISSIEQKTEGSEK(8)-EKQIAK(2)	10	2.02e-06
34	C26F1.4(122)-C23G10.3(110)	YVNVASGPGKK(10)-YKLVGGLAVR(2)	9	5.82e-14
35	C42D8.2a(1388)-C43E11.6a(704)	KIQSEDYSAYQIER(1)-KQLER(1)	9	1.38e-07
36	M176.2(240)-LLC1.3a(54)	HVEYELEKLGVPMTCIIR(8)-AAQLGMKTVCVEK(7)	9	2.49e-07
37	Y71F9AL.13a(55)-C32E8.2a(207)	LKHIPRPNMK(2)-EAAEENK(7)	8	5.23e-15
38	Y45G12C.2(45)-R107.7(100)	FDYEGNEWQEFKK(12)-DLHTKYTTMIYR(5)	8	3.45e-11
39	B0041.4(307)-F53G12.10(27)	KNPVLPK(1)-TKAAQHK(2)	8	2.92e-08
40	F55H2.2(22)-ZK688.6a(159),F55H2.2(22)-ZK688.6b(220)	MAQTLMKTR(7)-IKGAQK(2)	8	7.77e-07
41	Y106G6H.3a(2)-C42C1.14(106)	APAAKPQVK(1)-VIKHQK(3), APAAKPQVK(1)-VIKHQKD(3)	8	2.2e-05
42	Y71F9AL.13a(46)-C09H10.2(6)	NYDPQKDKR(8)-VNVPKAR(5)	7	1e-15
43	C36E6.3(120)-F11C3.3(735),C36E6.3(120)-R06C7.10(733),C36E6.5(120)-F11C3.3(735),C36E6.5(120)-R06C7.10(733)	IKEDDLIKILQNK(8)-YAILAAKEAK(7)	7	6.05e-11
44	D1007.6(125)-C23G10.3(110)	TEKVTEAGPGGAPVYR(3)-YKLVGGLAVR(2)	7	6.11e-10
45	F53G12.10(32)-B0041.4(307)	AAQHKVTVAAK(5)-KNPVLPK(1)	7	2.79e-08
46	R06C7.10(82)-F09F7.2a(94)	DIVQEVNPPKFEK(10)-VFDKEETGK(4)	7	2.92e-08
47	Y71A12B.1a(155)-D1007.12(96)	HDDVTKYVITHDK(6)-AVAGLSLDAILAKR(13)	7	2.58e-07
48	C42D8.2a(1363)-C15B12.7a(498),C42D8.2a(1363)-C15B12.7b(540),K09F5.2(1365)-C15B12.7a(498),K09F5.2(1365)-C15B12.7b(540)	NSEEMIIKVIR(8)-KVVDGK(1)	7	4.6e-06
49	F52B5.6(110)-Y46G5A.1a(246),F52B5.6(110)-Y46G5A.1b(246),F52B5.6(110)-Y46G5A.1d(246)	AVHALYNVKAVK(9)-KSAAPR(1)	6	5.92e-09
50	F11C3.3(735)-F09F7.2a(142),R06C7.10(733)-F09F7.2a(142)	YAILAAKEAK(7)-YEDFIKK(6)	6	8.59e-09
51	F09F7.2a(94)-F11C3.3(252)	VFDKEETGK(4)-IHFNKHGR(5)	6	7.59e-08
52	F09F7.2a(94)-T18D3.4(258)	VFDKEETGK(4)-IHFSKQGR(5)	6	1.4e-07
53	Y55F3AM.1(68)-C05D11.10(49)	VQLVKHADK(5)-KYFAR(1)	6	1.39e-06
54	T05H4.12(117)-C06H2.1(122),T05H4.12(117)-F18C12.3(391),T05H4.12(117)-R07H5.4(196)	KAEQAAR(1)-KVEEK(1)	6	1.66e-05
55	B0511.10(408)-C17G10.9a(521)	SVSIHEQVMENTKR(13)-HIQKLQEVQDVLK(4)	5	2.62e-11
56	Y71F9AL.13a(46)-C32E8.2a(207)	NYDPQKDKR(8)-EAAEENK(7)	5	1.92e-09
57	F35G12.10(259)-H28O16.1d(2)	ETEETKAR(6)-AGASGSEVSK(1)	5	1.63e-08
58	R107.7(42)-Y45G12C.2(103)	VTYEQWADIKPK(10)-MKYVR(2)	5	1.28e-07
59	Y71F9AL.13a(117)-C32E8.2a(207)	SYDAFIASESLIKQIPR(13)-EAAEENK(7)	5	1.57e-07
60	F56H1.4(63)-F23F1.8a(49),F56H1.4(63)- F23F1.8b(41)	INHSATTLKER(9)-KESEMTK(1)	5	1.89e-06
61	F01G10.1(515)-C34D4.13(106)	IVLVGSGVTLYESLKAAEELEK(15)-VKEDQKK(2)	5	2.01e-06
62	K09F5.2(1104)-C42D8.2a(745)	DYTMNTEVTTVCDKQVR(14)-IQTGIKLLK(6)	4	1.47e-10
63	ZK970.4(96)-F55H2.2(65)	YAVDNHTQSIPAVLEIPSKEAPYDPSK(19)-VLMGEVMKEAAFSLAEAK(8)	4	2.75e-09
64	F02A9.3(129)-C28D4.2a(379),F02A9.3(129)-C28D4.2b(353)	ELHQQYLAGDKPTLDSLKELAK(11)-KVFCEAYLDEVYK(1)	4	7.11e-09
65	Y24D9A.4a(35)-C42C1.14(103)	NPLFEKR(6)-IVNKVIK(4)	4	2.17e-08
66	C04F6.1(281)-T27A3.1c(2),F59D8.1(281)-T27A3.1c(2),F59D8.2(281)-T27A3.1c(2)	VTFVEESKINR(8)-SPTPTR(1)	4	4.24e-08
67	F52D10.3a(70)-Y48G8AL.5(294),M117.2a(70)-Y48G8AL.5(294)	VISSIEQKTEGSEK(8)-KGAQQLK(1)	4	3.29e-07
68	Y57G11C.16(94)-F36A2.6(20)	DGKTGQLLSTAVDNK(3)-KFMYR(1)	4	1.19e-06
69	VC5.3a(297)-B0035.5(506),VC5.3a(918)-B0035.5(506)	WMTPEQLGDITALKAAGK(14)-KYGFIFTGTYK(1), WMTPEQLGDITALKAAGKDTEVQEK(14)-KYGFIFTGTYK(1)	4	2.44e-06
70	F37C12.4(2)-C32E8.2a(175)	SGPGIEGLAVGLNK(1)-KVEIFR(1)	4	3.42e-06
71	Y41E3.4a(427)-F26F4.10a(52)	IKYVPHHR(2)-KLNDK(1)	4	4.3e-06
72	Y66H1B.2a(883)-F02H6.5c(1),Y66H1B.2h(883)-F02H6.5c(1),Y66H1B.2i(885)-F02H6.5c(1),Y66H1B.2l(885)-F02H6.5c(1)	YNVPMKINPDGTYSTDTPLMEVGEHK(6)-MSLEANR(1)	4	2.75e-05
73	M03F4.2a(329)-Y105E8B.1a(248)*	IKIIAPPER(2)-SVQKLQK(4), IKIIAPPERK(2)-SVQKLQK(4)	4	2.8e-05
74	F09F3.9(531)-W04D2.6a(168),F09F3.9(531)-W04D2.6c(168)	LKECGISPDGFVQMAIQLAYYK(2)-LKILHWMETDHK(2)	4	3.15e-05
75	D1007.6(93)-C23G10.3(69)	EYLALPAEIVPATIKTKPR(15)-IKELTSVVQK(2)	3	2.8e-10
76	D1007.12(139)-T07A9.11(84),D1007.12(139)-T23B5.3d(47)	KASQPKTQQK(6)-KFEPK(1)	3	8.06e-10
77	R151.3(214)-C04F12.4(103)	NQYPHKMQF(6)-AKLTDFER(2)	3	2.26e-09
78	C23G10.3(92)-D1007.6(125)	FGFEEGSVELYAEKVSNR(14)-TEKVTEAGPGGAPVYR(3)	3	3.21e-09
79	F02E8.1(261)-H28O16.1d(2)	ETEESKAR(6)-AGASGSEVSK(1)	3	9.54e-09
80	T18D3.4(1473)-R06C7.10(1466)	VIDEWKK(6)-KVDDIQK(1)	3	1.74e-08
81	ZK652.4(71)-W01D2.1(85)	KFYADHK(1)-EGTTPKPR(6)	3	2.01e-08
82	K09F5.2(731)-C42D8.2a(748)	LESIEKESTTVVR(6)-LLKELAQK(3)	3	9.86e-08
83	Y38H6C.1a(79)-ZK652.4(14)	KKAELIEAAK(1)-KDALQK(1)	3	2.75e-07
84	F43G9.1(65)-Y59A8A.1(437)	IFEAADAPIAWDPVDVTPVKGR(20)-NVDELFEKIR(8)	3	3.83e-07
85	C47E8.5(62)-T21C12.1c(353),C47E8.5(62)-T21C12.1k(353),C47E8.5(62)-T21C12.1m(185)	YQALTEPSELDTGKELFIK(14)-KAAEQQQR(1)	3	5.03e-07
86	C23G10.3(92)-D1007.6(115)	FGFEEGSVELYAEKVSNR(14)-AAQGEKGDR(6)	3	7.32e-07
87	H28O16.1a(412)-F43G6.1a(87),H28O16.1a(412)-F43G6.1b(51),H28O16.1d(385)-F43G6.1a(87),H28O16.1d(385)-F43G6.1b(51)	AMKQVAGSMK(3)-EKISPR(2)	3	3.5e-06
88	F32D1.2(36)-Y69A2AR.18a(58)	AAVKKPEATLK(4)-YAKAER(3)	3	5.4e-06
89	F09G2.9(126)-Y38E10A.22a(302)	KSEEAPAPEEKK(1)-KLLEEHFK(1)	3	5.53e-06
90	C47E8.5(504)-R07B5.9f(207),C47E8.5(504)-R07B5.9h(207),C47E8.5(504)-ZK370.2(9)	GFEVLYMCDPIDEYCVQQLKEYDGKK(20)-KITER(1)	3	1.03e-05
91	C47E8.5(378)-F28D1.1(537),C47E8.5(378)-T22C1.10a(708),C47E8.5(378)-T22C1.10b(692),C47E8.5(378)-Y47G6A.29(1377)	EMLQQSKILK(7)-KNIVK(1)	3	1.2e-05
92	F11H8.3(38)-F11G11.11(61)	AITKDTWQR(4)-SKNADLK(2)	3	1.43e-05
93	ZK652.4(14)-F55D10.2(2)	KDALQK(1)-APSAPAK(1)	3	1.44e-05
94	C47E8.5(378)-C05C12.3(981)	EMLQQSKILK(7)-KNVIK(1)	3	3.46e-05
95	T05H4.12(128)-C06H2.1(122),T05H4.12(128)-F18C12.3(391),T05H4.12(128)-R07H5.4(196)	NAALKQ(5)-KVEEK(1)	3	3.54e-05
96	VC5.3a(457)-F22E12.1(528)	CKVYFTPLMTSEELDK(2)-KYKEDLEK(1)	3	5.08e-05
Intra-molecular Cross-links
97	C42D8.2a(953)-C42D8.2a(326),K09F5.2(955)-K09F5.2(326)	FPGFSKFEYIEAEER(6)-AEFAPFEKFPLDKK(8), FPGFSKFEYIEAEER(6)-NGDKAEFAPFEKFPLDK(12), FPGFSKFEYIEAEER(6)-AEFAPFEKFPLDK(8)	119	2.31e-15
98	F31E3.5(439)-F31E3.5(219),R03G5.1a(439)-R03G5.1a(219)	QTVAVGVIKSVEK(9)-KEGNASGK(1)	107	4.64e-11
99	M117.2a(70)-M117.2a(77)	VISSIEQKTEGSEK(8)-KQQLAK(1)	100	8.73e-15
100	F52D10.3a(70)-F52D10.3a(77)	VISSIEQKTEGSEK(8)-KQQMAK(1)	76	1.41e-09
101	C04F6.1(1372)-C04F6.1(1349),F59D8.1(1372)-F59D8.1(1349),F59D8.2(1372)-F59D8.2(1349)	EEEIVVKK(7)-FAVLAKK(6), REEEIVVKK(8)-FAVLAKK(6)	55	7.51e-15
102	F09F7.2a(39)-F09F7.2a(2)	AAGLKPTQAMVTK(5)-APPSQDVLK(1)	55	1.05e-11
103	H06O01.1(207)-H06O01.1(277)	LHNKFDTNEFK(4)-VLKVAQNYK(3), KLHNKFDTNEFK(5)-VLKVAQNYK(3), LHNKFDTNEFKYDGNYDTDK(4)-VLKVAQNYK(3)	53	1.01e-14
104	VC5.3a(333)-VC5.3a(231)*	CKVYFTPLMTSEELEK(2)-GDKEAAGALVK(3), CKVYFTPLMTSEELEK(2)-TLKGDKEAAGALVK(6)	43	8.2e-14
105	C42D8.2a(1043)-C42D8.2a(1068)	YNKIFEK(3)-MVKNIQK(3)	40	2.52e-08
106	VC5.3a(333)-VC5.3a(228)*	CKVYFTPLMTSEELEK(2)-TLKGDKEAAGALVK(3)	38	9.37e-17
107	C53H9.1(93)-C53H9.1(27)	YSVDVAFDKTNINK(9)-AVVVKQQDEGVSDR(5)	37	3.08e-24
108	C36E6.5(107)-C36E6.5(120)	LTGTDPEATIVGAFAMFDKK(19)-IKEDDLIKILQNK(8)	37	1.65e-20
109	F25H5.4a(50)-F25H5.4a(2)	AGIIAGSKAGETR(8)-VNFTVDEIR(1)	37	5.96e-09
110	C04F6.1(410)-C04F6.1(370),F59D8.1(410)-F59D8.1(370),F59D8.2(410)-F59D8.2(370)	NTIQHLIHHFEKK(12)-MCTIEELKK(8)	36	1.03e-21
111	C42D8.2a(1424)-C42D8.2a(1311)	FDGYTIKTQLPSYSR(7)-HQLTEASGSVCKVQK(12)	35	2.82e-26
112	F07D10.1(59)-F07D10.1(74),T22F3.4(59)-T22F3.4(74)	VLEQLTGQTPVFSKAR(14)-NEKIAVHCTVR(3), VLEQLTGQTPVFSKAR(14)-RNEKIAVHCTVR(4)	35	2.46e-19
113	T27E9.1a(151)-T27E9.1a(249)	LAADIGKANDREFK(7)-KDILYK(1), LAADIGKANDR(7)-KDILYK(1)	35	2.46e-10
114	F52D10.3a(13)-F52D10.3a(77)	AKLAEQAER(2)-KQQMAK(1)	34	1.88e-09
115	M117.2a(13)-M117.2a(77)	AKLAEQAER(2)-KQQLAK(1)	33	2.31e-09
116	Y38H6C.1a(62)-Y38H6C.1a(80)	MIGETNEYIKGQSEADQK(10)-KAELIEAAK(1)	32	3.12e-14
117	F46F11.2(89)-F46F11.2(71)	NDGEKDIFVHQTAIAK(5)-VKWYSVLR(2)	32	1.84e-13
118	F31E3.5(146)-F31E3.5(219),R03G5.1a(146)-R03G5.1a(219)	EHALLAQTLGVKQLIVACNK(12)-KEGNASGK(1)	32	8.85e-10
119	R05F9.10(117)-R05F9.10(173)	EEGNDLMKASQFEAAVQK(8)-TALALDPSYSKAWGR(11), LKEEGNDLMKASQFEAAVQK(10)-TALALDPSYSKAWGR(11)	32	1.17e-09
120	C04F6.1(472)-C04F6.1(223),F59D8.1(472)-F59D8.1(223),F59D8.2(472)-F59D8.2(223)	GFASKTQDLPLIRPASR(5)-FGSECKECEK(6), GFASKTQDLPLIR(5)-FGSECKECEK(6)	31	1.24e-15
121	F01G10.1(463)-F01G10.1(60)	ATELAANTKGVVFIR(9)-YDVAEPKSASADR(7)	30	2.05e-20
122	C42D8.2a(1102)-C42D8.2a(1033)	DYTMNTELTTVCDKQVR(14)-LTVGQLEKTELSQIK(8)	29	3.3e-14
123	F10B5.1(101)-F10B5.1(121)	INKMLSCAGADR(3)-GAYGKPQGLVAR(5)	29	3.42e-12
124	F46H5.3a(368)-F46H5.3a(338)	GIHGEHSESEGGVYDISNKAR(19)-ISAKPDFKSICDGLK(8)	28	2.29e-23
125	Y45F10D.12(65)-Y45F10D.12(72)	NRQPLSLAKLAR(9)-AVQKAGNENK(4), QPLSLAKLAR(7)-AVQKAGNENK(4)	28	1.17e-14
126	C04F6.1(749)-C04F6.1(727),F59D8.1(749)-F59D8.1(727),F59D8.2(749)-F59D8.2(727)	VQSGIQMLQEIVKK(13)-LSLYGKQSDELR(6), RVQSGIQMLQEIVKK(14)-LSLYGKQSDELR(6)	28	1.63e-10
127	Y65B4BL.5(377)-Y65B4BL.5(397)	VLAEDIKELKPTVVPVVPR(7)-LYDKVMSEVNK(4)	27	4.92e-15
128	ZK829.4(169)-ZK829.4(67)	IDPKQYTDYEIEK(4)-LAEELKSNSLSQK(6)	27	7.77e-14
129	F46H5.3a(216)-F46H5.3a(230)	YFPLDGMTKEIQDQLIK(9)-DHFLFKEGDR(6)	27	1.1e-13
130	F53G12.10(100)-F53G12.10(103)	GINQLHPKPR(8)-KALQILR(1)	26	3.05e-28
131	F46E10.10a(310)-F46E10.10a(318)	IVQGLSFDDFAKGK(12)-IAATTKELEEER(6), IVQGLSFDDFAKGK(12)-IAATTKELEEERDDALK(6)	26	6.25e-20
132	K10C2.4(145)-K10C2.4(373)	GKENALMPNWK(2)-GAKEVPVGSEIR(3)	26	2.1e-16
133	C04F6.1(861)-C04F6.1(915),F59D8.1(861)-F59D8.1(915),F59D8.2(861)-F59D8.2(915)	VSIELEKLGAR(7)-KNTLEITHK(1)	26	6.94e-14
134	T05G5.6(226)-T05G5.6(282)	LGEKIADQSPLIVQMAK(4)-KPQWESK(1)	26	1.76e-12
135	C42D8.2a(953)-C42D8.2a(833)	FPGFSKFEYIEAEER(6)-KFPTTLGLPLTISGK(1)	25	2.07e-16
136	T05E11.3a(325)-T05E11.3a(319)	KPNQVEEDEYK(1)-VNNVKPIWMR(5)	25	8.9e-14
137	F09F7.2a(77)-F09F7.2a(2)	EKEQGTYADFYEGLK(2)-APPSQDVLK(1)	25	3.91e-13
138	F25H2.11(97)-F25H2.11(117)	FMKNVIDHMEK(3)-DKADVDAFKK(9), FMKNVIDHMEK(3)-ADVDAFKK(7)	25	6.21e-13
139	F28C6.7a(36)-F28C6.7a(41),F28C6.7b(36)-F28C6.7b(41),F28C6.7c(36)-F28C6.7c(41)	IMSAPLTKELR(8)-TKHGIR(2)	25	1.08e-10
140	ZK829.4(67)-ZK829.4(505)	LAEELKSNSLSQK(6)-TAHKYNLGLDIR(4)	24	7.3e-15
141	F33H1.2(85)-F33H1.2(112),T09F3.3(85)- T09F3.3(112)	VFNSKDPAAIAWGSVK(5)-EKASAHLQGGAK(2)	24	6.83e-14
142	B0336.10(113)-B0336.10(75)	GEMKGSAITGPVAK(4)-KVLQGVVIR(1)	24	2.57e-13
143	F25H5.4a(475)-F25H5.4a(492)	FIEPIEDIPSGNIAGLVGVDQYLVKGGTITTYK(25)-VMKFSVSPVVR(3)	23	5.58e-15
144	T27E9.1a(67)-T27E9.1a(56)	VPKEQGVAALWR(3)-YKGIMDVLIR(2)	23	1.08e-12
145	F25H5.4a(50)-F25H5.4a(61)	AGIIAGSKAGETR(8)-KDEQER(1)	23	1.55e-10
146	C14B1.1(254)-C14B1.1(111)	LSAVTEFTHESAQEIVGGDLKK(21)-SGKPTKYTGGR(6)	23	1.03e-09
147	C07D8.6(219)-C07D8.6(263)	VNFTLPTGQKLDWAPAPSDLQDQNVLALAEK(10)-GCAILPKSIQENR(7)	23	2.23e-09
148	R05G6.7(236)-R05G6.7(14)	AKVNSSSQVAVAATHSLSPALK(2)-SAKDLFNK(3)	23	1.07e-08
149	F25H5.4a(2)-F25H5.4a(61)	VNFTVDEIR(1)-KDEQER(1)	23	7.35e-07
150	K07H8.6a(1204)-K07H8.6a(1170)	FVKQIEQAPEHETLLEASR(3)-TVEELKEQKYR(9)	22	6.8e-16
151	F54A3.5(82)-F54A3.5(2)	HDFASPYVLHGKR(12)-APGASAPAASR(1)	22	4.8e-12
152	F54D11.1(309)-F54D11.1(316)	DCIQHIPDTEKLFSR(11)-IYKALKPGGK(3)	22	1.11e-11
153	R107.7(100)-R107.7(42)	DLHTKYTTMIYR(5)-VTYEQWADIKPK(10)	22	2.08e-11
154	C36B1.4(49)-C36B1.4(29)	KSIPALQDDR(1)-KGSTAVGVR(1)	22	4.01e-11
155	C16A3.9(39)-C16A3.9(43)	MTAEEVQDQIVKMAK(12)-KGLRPSQIGVILR(1)	21	2.79e-17
156	F09F7.2a(75)-F09F7.2a(2)	RLTFEEWLPMYEQLAKEK(16)-APPSQDVLK(1), LTFEEWLPMYEQLAKEK(15)-APPSQDVLK(1)	21	4.57e-14
157	Y22D7AL.5a(63)-Y22D7AL.5a(73)	NVIIEQSWGSPKITK(12)-DGVTVAKSIDLK(7)	21	3.07e-13
158	Y105C5B.5(61)-Y105C5B.5(46)	AELLKFSEATGR(5)-GKEAFYGK(2), DAIKAELLKFSEATGR(9)-GKEAFYGK(2)	21	8.28e-10
159	F54D11.1(309)-F54D11.1(166)	DCIQHIPDTEKLFSR(11)-KVFAPTTDATITFR(1)	20	5.81e-16
160	VC5.3a(209)-VC5.3a(228),VC5.3a(209)-VC5.3a(352),VC5.3a(209)-VC5.3a(849)	CKVYFTPLMTSDELEK(2)-TLKGDKEAAGALVK(3)	20	7.3e-16
161	C47E8.5(414)-C47E8.5(326)	FYEQFGKNLK(7)-APFDLFENKK(9)	20	9.2e-15
162	F26D10.3(77)-F26D10.3(101)	KFDDPAVQSDMK(1)-VISAEGAKPK(8)	20	1.88e-14
163	K09F5.2(1426)-K09F5.2(1313)	FDGYTIKTQLPSYSR(7)-HLLNEASGSVCKVQK(12)	20	1.08e-13
164	F56H1.4(63)-F56H1.4(67)	INHSATTLKER(9)-IKENTER(2)	20	1.39e-11
165	C47E8.5(601)-C47E8.5(555)	DSSTMGYMAAKK(11)-KVEKVGVSNR(4), DSSTMGYMAAKK(11)-VEKVGVSNR(3)	19	8.14e-27
166	C42D8.2a(1102)-C42D8.2a(745)	DYTMNTELTTVCDKQVR(14)-IQTGIKLLK(6)	19	1.47e-17
167	F10B5.1(121)-F10B5.1(91)	GAYGKPQGLVAR(5)-KHPFHVTR(1)	19	1.33e-13
168	F52D10.3a(117)-F52D10.3a(161),M117.2a(117)-M117.2a(160)	AGAAESKVFYLK(7)-DKMQPTHPIR(2)	19	6.62e-12
169	R13A5.8(63)-R13A5.8(57)	KELAAIR(1)-KWFGVR(1)	19	4.43e-11
170	Y38H6C.1a(52)-Y38H6C.1a(35)	DAATSLAIITKMIGETNEYIK(11)-KDDEPER(1)	19	3.83e-10
171	Y39G10AR.20(78)-Y39G10AR.20(14)	LQKAVADLR(3)-IKTGTVQR(2)	19	1.06e-08
172	M01F1.2(101)-M01F1.2(79)	GNEALKNLR(6)-APGKIFWR(4)	19	1.38e-08
173	Y22D7AL.5a(63)-Y22D7AL.5a(224)	NVIIEQSWGSPKITK(12)-GYISPYFITSAKGAK(12)	18	3.83e-18
174	K08E3.5c(315)-K08E3.5c(294)	LMLLEIAQVPKDYVDEFK(11)-ADVKGGTLIQYEGR(4)	18	3.28e-14
175	C04F6.1(1422)-C04F6.1(1309),F59D8.2(1422)-F59D8.2(1309)	FDGYTVKTNMPSVASQNQLCGLCGNNDGER(7)-TGATCKVDQSEVSTFDNVIYR(6)	17	5.16e-42
176	C04F6.1(27)-C04F6.1(281),F59D8.1(27)-F59D8.1(281),F59D8.2(27)-F59D8.2(281)	TFSPKSEYVYK(5)-VTFVEESKINR(8)	17	1.75e-14
177	T08H10.1(220)-T08H10.1(268)	KAARPDGVWPEGDPLLEPIVK(1)-HLTQHGISTIPKSVSPDR(12)	17	1.04e-13
178	F02A9.2a(119)-F02A9.2a(112)	KIHAQYLAGEKPSLDTLK(1)-KAIAEGR(1)	17	2.12e-13
179	C04F6.1(1422)-C04F6.1(1191),F59D8.1(1422)-F59D8.1(1191),F59D8.2(1422)-F59D8.2(1191)	FDGYTVKTNMPSVASQNQLCGLCGNNDGER(7)-EYKGIPEYELLIK(3)	17	1.46e-12
180	C04F6.1(1422)-C04F6.1(1303)	FDGYTVKTNMPSVASQNQLCGLCGNNDGER(7)-SAMFQQTWEKTGATCK(10)	16	3.8e-18
181	R07H5.8(57)-R07H5.8(101)	DFKVEYIPGGAAQNSLR(3)-DQYGDLLASKAK(10)	16	1.41e-16
182	Y57G11C.15a(385)-Y57G11C.15a(392)	TWIDVSGSSAKDVAK(11)-QLKEQQMVMR(3)	16	1.56e-12
183	VC5.3a(954)-VC5.3a(978)	GTCKTYFSPLLTSEESEK(4)-IKEHVASGDKEASK(10), GTCKTYFSPLLTSEESEK(4)-EHVASGDKEASK(8)	16	6.49e-11
184	Y49A3A.5(49)-Y49A3A.5(109)	VTMELFNDVVPKTAENFR(12)-FKDENFDLK(2)	16	1.39e-08
185	C36E6.3(107)-C36E6.3(120)	LTGTDPEATIIGAFAMFDKK(19)-IKEDDLIKILQNK(8)	15	6.74e-23
186	C04F6.1(1336)-C04F6.1(1470),F59D8.1(1336)-F59D8.1(1470)	APLTTCYSLVAKDCSEQPR(12)-SYLLKNEECEVENDR(5)	15	1.23e-21
187	C04F6.1(1336)-C04F6.1(1361),F59D8.1(1336)-F59D8.1(1361),F59D8.2(1336)-F59D8.2(1361)	APLTTCYSLVAKDCSEQPR(12)-NSEELLVKVVR(8)	15	1.01e-12
188	C32F10.8a(58)-C32F10.8a(143)	AVELEKELATGAQKPFPNVIK(6)-KHVAEYIK(1)	15	3.11e-11
189	F20H11.3(88)-F20H11.3(134)	VTAHTGPKELYAAVENADVIVIPAGVPR(8)-DLAAVIAKASPK(8)	15	7.02e-10
190	C42D8.2a(1605)-C42D8.2a(1537)	QQPLQLDDYPVSFVESVKVPTACVAY(18)-TQIKEFSHR(4)	15	3.05e-09
191	F10C1.2b(583)-F10C1.2b(467)	ATHTQKTIQSGQ(6)-GEVSTKTTFQR(6)	15	3.78e-09
192	Y38H6C.1a(35)-Y38H6C.1a(33)	KDDEPERDAATSLAIITK(1)-IAATYKK(6), KDDEPER(1)-IAATYKK(6)	15	5.45e-09
193	Y24D9A.4a(76)-Y24D9A.4a(73)	LKVPPTINQFR(2)-QSAILQKR(7)	14	2.1e-12
194	F09F7.2a(136)-F09F7.2a(143)	GVEDGEGMVKYEDFIK(10)-KVLAGPFPDQD(1)	14	1.89e-10
195	C25F6.3(59)-C25F6.3(379)	NEEKGCGSTCGESK(4)-KGFTGIR(1)	14	8.92e-10
196	F20H11.3(245)-F20H11.3(109)	IQDAGTEVVNAKAGAGSATLSMALAGAR(12)-KPGMTR(1)	14	2e-09
197	C47E8.5(585)-C47E8.5(510)	IMKAQALR(3)-KLVSVTK(1)	14	7.35e-09
198	F11C3.3(1112)-F11C3.3(1118)	LEDEQALVSKLQR(10)-QIKDGQSR(3)	14	4.09e-06
199	F09F7.2a(77)-F09F7.2a(39)	EKEQGTYADFYEGLK(2)-AAGLKPTQAMVTK(5)	13	1.32e-17
200	F01F1.12a(315)-F01F1.12a(46)	ALQASVLKAWGGKDENIAAAQK(8)-GILAADESTGTIGKR(14)	13	4.3e-14
201	F26D10.3(247)-F26D10.3(252)	MVNHFCAEFKR(10)-KDLASNPR(1)	13	9.11e-14
202	H28O16.1a(146)-H28O16.1a(246),H28O16.1d(119)-H28O16.1d(219)	VVDALGNPIDGKGPIANAR(12)-STVAQIVKR(8)	13	9.44e-14
203	W02D3.5(22)-W02D3.5(32)	LIHSENFEEYMKEVGVGLITR(12)-KAAANLKPTLEIK(1)	13	1.02e-13
204	F37C12.11(76)-F37C12.11(16)	LAQKDGLVPR(4)-KCSSSNR(1)	13	1.34e-13
205	F31E3.5(255)-F31E3.5(219),R03G5.1a(255)-R03G5.1a(219)	LPLQDVYKIGGIGTVPVGR(8)-KEGNASGK(1)	13	1.38e-10
206	F40A3.3a(148)-F40A3.3a(111),F40A3.3b(112)-F40A3.3b(75)	GDTLSEYIGAGPPPKTGLHR(15)-KEPTYR(1)	13	1.86e-09
207	M01F1.2(176)-M01F1.2(183)	KMDKLAVQAK(4)-KNAAPK(1), MDKLAVQAK(3)-KNAAPK(1)	13	2.98e-09
208	F54H12.1a(75)-F54H12.1a(57)	ILYGHLDQPKTQDIER(10)-LKRPLTLSEK(2)	13	7.28e-09
209	Y111B2A.18(10)-Y111B2A.18(41)	GGSEDQKVYVGNLPGDVR(7)-YVDIKSGR(5)	13	3.9e-08
210	F52B5.6(60)-F52B5.6(53)	DKLDSFAVIK(2)-KSAPAR(1)	13	9.81e-07
211	F59D8.1(1422)-F59D8.1(1309)	FDGYTVKTNMPSVASQNQLCGLCGNNDGER(7)-TGATCKVGQSEVSTFDNVIYR(6)	12	2.89e-34
212	K12F2.1(1472)-K12F2.1(1470)	KTDDLSSELDAAQR(1)-QFESIIAEWKK(10)	12	1.19e-14
213	C44E4.6(13)-C44E4.6(54)	TLSFDDAAATVKTLK(12)-AKWSAWDEKK(2), TLSFDDAAATVKTLK(12)-AKWSAWDEK(2)	12	2.99e-14
214	F10B5.1(101)-F10B5.1(91)	INKMLSCAGADR(3)-KHPFHVTR(1)	12	1.02e-13
215	F46E10.10a(240)-F46E10.10a(238)	KLSSAMSAAK(1)-GGVIIEKR(7)	12	1.43e-09
216	E04F6.5a(577)-E04F6.5a(570)	FLKDAGSGVENASK(3)-AMKSSNR(3)	12	4.86e-09
217	E04F6.5a(577)-E04F6.5a(577)	FLKDAGSGVENASK(3)-FLKDAGSGVENASK(3)	12	5.37e-09
218	C16A3.9(93)-C16A3.9(100)	GMAPELPEDLYHLVKK(15)-KHLER(1)	12	9.01e-08
219	ZK617.1b(3021)-ZK617.1b(3034)	VKLDNPEYQSK(2)-LVVKQMER(4)	12	4.03e-07
220	C08H9.2a(144)-C08H9.2a(153)	EIDIPKDHHGR(6)-LIGKEGALLR(4)	12	5.88e-07
221	R02D3.1a(58)-R02D3.1a(274),R02D3.1b(58)-R02D3.1b(274)	LTKSGVNVLIQPSNR(3)-KDHFVPK(1)	11	6.54e-15
222	C31C9.2(57)-C31C9.2(136)	SATKITAELLAASAGK(4)-KDFMGEEVYGR(1)	11	5.72e-14
223	H20J04.5(124)-H20J04.5(131)	LLTEKESAELR(5)-KAEALGQLPK(1)	11	4.08e-13
224	C47E8.5(414)-C47E8.5(585)	FYEQFGKNLK(7)-IMKAQALR(3)	11	1e-11
225	F02E8.1(255)-F02E8.1(248)	IDYLKETEESK(5)-NVQSVATELKR(10), RIDYLKETEESK(6)-NVQSVATELKR(10)	11	6.83e-11
226	C04F6.1(1361)-C04F6.1(1349),F59D8.1(1361)-F59D8.1(1349),F59D8.2(1361)-F59D8.2(1349)	NSEELLVKVVR(8)-FAVLAKK(6)	11	8.47e-09
227	F38B2.4a(8)-F38B2.4a(2)	KNINLAPLK(1)-APTVER(1)	11	2.61e-08
228	C06B8.8(52)-C06B8.8(9)	CASYLYTLVVADKDKAEK(15)-EIKDFLVK(3)	11	3.55e-08
229	C42D8.2a(766)-C42D8.2a(542)	ARPATYTEKDAFAMVYLR(9)-KEAIDALR(1)	11	4.64e-08
230	F25H5.4a(439)-F25H5.4a(432)	EDLYEKTIQR(6)-IQGPNYVPGKK(10)	11	2.25e-07
231	ZK652.4(71)-ZK652.4(14)	KFYADHK(1)-KDALQK(1)	11	4.23e-07
232	F10C1.2b(583)-F10C1.2b(511)	ATHTQKTIQSGQ(6)-KLDGR(1)	11	4.93e-07
233	C42D8.2a(552)-C42D8.2a(542),K09F5.2(554)-K09F5.2(544)	LLKDTMPR(3)-KEAIDALR(1)	11	1.13e-06
234	K07H8.6a(1170)-K07H8.6a(1101)	TVEELKEQKYR(9)-KFEWLQNEK(1)	10	2.02e-19
235	C47E8.5(601)-C47E8.5(551)	DSSTMGYMAAKK(11)-VIKDILEKK(8), DSSTMGYMAAKK(11)-DILEKK(5)	10	2.35e-19
236	F31E3.5(273)-F31E3.5(255),R03G5.1a(273)-R03G5.1a(255)	VETGIIKPGMVVTFAPQNVTTEVK(7)-LPLQDVYKIGGIGTVPVGR(8)	10	2.83e-14
237	H28O16.1d(31)-H28O16.1d(2)	ILGTETGINLEETGKVLSIGDGIAR(15)-AGASGSEVSK(1)	10	4.05e-13
238	F59D8.2(194)-F59D8.2(243)	TMEGDCEVAYTIVQEGGKTIYTK(18)-EGQFVQPQTVYTYTFKNEK(16)	10	8.17e-12
239	VC5.3a(1379)-VC5.3a(1372)	KLKDENAEQSEIEK(3)-VAQFKAQYK(5), LKDENAEQSEIEK(2)-VAQFKAQYK(5)	10	1.03e-11
240	F26D10.3(362)-F26D10.3(349)	ELNKSINPDEAVAYGAAVQAAILSGDK(4)-VQKLLSDLFSGK(3)	10	8.41e-11
241	Y22D7AL.5a(460)-Y22D7AL.5a(443)	AANEDQQIGVNIVKK(14)-SLTALKNYK(6)	10	1.23e-10
242	F25H5.4a(475)-F25H5.4a(506)	FIEPIEDIPSGNIAGLVGVDQYLVKGGTITTYK(25)-VAVEAKNPADLPK(6)	10	6.29e-10
243	Y38H6C.1a(52)-Y38H6C.1a(34)	DAATSLAIITKMIGETNEYIK(11)-KKDDEPER(1)	10	8.05e-10
244	C09H10.2(23)-C09H10.2(6)	HTNHKVTQYK(5)-VNVPKAR(5)	10	1.28e-09
245	F07A5.7a(569)-F07A5.7a(573)	ANIEAQKTIK(7)-KQSEQLK(1)	10	1.75e-09
246	Y53F4B.30(45)-Y53F4B.30(109)	MTIGDGTWENLKAK(12)-EVGKASAAGK(4)	10	2.19e-09
247	T27E9.1a(262)-T27E9.1a(249)	KIIQNEGMSAMFK(1)-KDILYK(1)	10	9.3e-09
248	C04F6.1(1336)-C04F6.1(572),F59D8.1(1336)-F59D8.1(572),F59D8.2(1336)-F59D8.2(572)	APLTTCYSLVAKDCSEQPR(12)-QNKPELR(3)	10	9.5e-09
249	C06A1.1(665)-C06A1.1(670)	HQILKASLR(5)-KTPLSK(1)	10	3e-08
250	B0286.3(293)-B0286.3(286)	KFGLETTLK(1)-KISDEAK(1)	10	4.98e-08
251	Y39G8B.1a(221)-Y39G8B.1a(293)	KDGDPNVLTNEVVAGIAK(1)-IDGINKNWR(6)	10	6.35e-08
252	F20H11.3(134)-F20H11.3(161)	DLAAVIAKASPK(8)-KAGVYDPK(1)	10	2.2e-06
253	C44B7.10(458)-C44B7.10(465)	ESLDKAAFDR(5)-LKVMPSAD(2)	10	3.84e-06
254	F26H9.5(47)-F26H9.5(332)	SKEFGALLNETISLIR(2)-NMISLKGHR(6)	10	5.08e-06
255	ZC434.8(193)-ZC434.8(200)	LIADHFLFKEGDR(9)-FLKAANANR(3)	9	2.77e-12
256	F54D8.3a(323)-F54D8.3a(448)	TFVEGKIYDDFVAR(6)-DIDKALHIANATR(4)	9	2.44e-11
257	F33H1.2(200)-F33H1.2(112),T09F3.3(200)-T09F3.3(112)	TVDGPSGKLWR(8)-EKASAHLQGGAK(2)	9	1.4e-10
258	F31E3.5(146)-F31E3.5(439),R03G5.1a(146)-R03G5.1a(439)	EHALLAQTLGVKQLIVACNK(12)-QTVAVGVIKSVEK(9)	9	3.29e-09
259	T10B5.5a(345)-T10B5.5a(229)	CGKFYEQQVGSER(3)-KYSNVK(1)	9	3.51e-09
260	Y37E3.9(198)-Y37E3.9(205)	QVAQQEAEKAR(9)-YLVEKAEQMK(5)	9	4.69e-09
261	F01F1.6(529)-F01F1.6(342)	ELPLAQGIKFE(9)-KAYAQFESR(1)	9	8.23e-09
262	D1007.6(125)-D1007.6(115)	TEKVTEAGPGGAPVYR(3)-AAQGEKGDR(6), TEKVTEAGPGGAPVYR(3)-AAQGEKGDREAYR(6)	9	5.38e-08
263	K12G11.3(208)-K12G11.3(338)	VVAMDHGSKEAHCK(9)-MLDGKINSR(5)	9	4.65e-07
264	Y45G12C.2(45)-Y45G12C.2(103)	FDYEGNEWQEFKK(12)-MKYVR(2)	9	2.59e-06
265	Y41E3.4a(145)-Y41E3.4a(133)	YSFPAGKLLGELR(7)-EKIVAER(2)	9	5.24e-06
266	K09F5.2(1045)-K09F5.2(1070)	YNKIFEK(3)-MVKSIQK(3)	9	6.16e-06
267	C47E8.5(100)-C47E8.5(46)	ADLVNNLGTIAKSGTK(12)-ELISNASDALDKIR(12)	8	1.81e-22
268	C47E8.5(601)-C47E8.5(585)	DSSTMGYMAAKK(11)-IMKAQALR(3)	8	1.06e-18
269	C55F2.1b(358)-C55F2.1b(333)	EVSDGVVAPDFDPAALSLLAKK(21)-CDELTAKIINR(7)	8	1.22e-12
270	F13B10.2a(283)-F13B10.2a(353)	TIINNKIYR(6)-SLITQTKR(7)	8	2.91e-12
271	F59D8.1(1422)-F59D8.1(1303),F59D8.2(1422)-F59D8.2(1303)	FDGYTVKTNMPSVASQNQLCGLCGNNDGER(7)-AMFQQTWEKTGATCK(9)	8	2.63e-11
272	F53G12.10(38)-F53G12.10(27)	VTVAAKNK(6)-TKAAQHK(2)	8	1.02e-10
273	C47E8.5(504)-C47E8.5(510)	GFEVLYMCDPIDEYCVQQLKEYDGK(20)-KLVSVTK(1)	8	1.37e-10
274	F59D8.1(1381)-F59D8.1(1349)	SDDKFLVKVDEK(8)-FAVLAKK(6)	8	3.94e-10
275	F01F1.6(374)-F01F1.6(392)	YKASVAEAVASGGK(2)-IEYGGKVLER(6)	8	8.11e-10
276	C23G10.4b(259)-C23G10.4b(227)	ICECYVLTDNAEAAADTITSLIAKSLSTR(24)-TYLKCPSPDMSK(4)	8	1.07e-09
277	Y67D8C.10a(694)-Y67D8C.10a(540),Y67D8C.10b(694)-Y67D8C.10b(540)	SIATACGILKPGEDFIALEGKEFNAR(10)-KSMSTVINLPDGGYR(1)	8	1.55e-09
278	F28C6.7a(133)-F28C6.7a(41)	VTGILKGK(6)-TKHGIR(2)	8	3.7e-09
279	K02F2.2(21)-K02F2.2(319)	KEIILAENEMPGLMAMR(1)-WLNTNATKK(8)	8	1.85e-08
280	ZK829.4(61)-ZK829.4(505)	GAEVIAPKLAEELK(8)-TAHKYNLGLDIR(4)	8	2.25e-08
281	F11C3.3(922)-F11C3.3(916)	LEAQQKDASK(6)-LAKLEAQQK(3)	8	2.51e-08
282	ZK617.1b(6072)-ZK617.1b(6043)	FSITTDDKFATLR(8)-IPYKAYPQGEAR(4)	8	1.66e-06
283	H06O01.1(65)-H06O01.1(121)	AAPKLASNDPPVALVK(4)-DADGIVKFMR(7)	8	4.64e-05
284	K09E2.3(2)-K09E2.3(183)	PAETAFHVPSDFTQEPVQFVALEDTGAILTHSR(1)-TDKNAVINVPEHTGTPLR(3)	7	6.45e-19
285	F07A5.7a(417)-F07A5.7a(410)	HLYEKAVEQK(5)-AVNAELQKMK(8)	7	8.51e-14
286	Y71A12B.1a(224)-Y71A12B.1a(215)	EEHDAKIAR(6)-LLAKYSK(4)	7	6.59e-12
287	H06O01.1(408)-H06O01.1(459)	YEELAEKLNKEDVIIAK(7)-EVKDFVSFISK(3)	7	1.02e-11
288	F53A3.3a(19)-F53A3.3a(71)	MNVLADALNAINNAEKR(16)-LNKASVISPR(3)	7	6.35e-11
289	C42D8.2a(753)-C42D8.2a(745)	ELAQKMNIR(5)-IQTGIKLLK(6)	7	1.73e-09
290	F42C5.8(37)-F42C5.8(26)	PAANTKIGAHR(6)-KFELGR(1)	7	2.73e-09
291	LLC1.3a(395)-LLC1.3a(430)	AEEQLKQEGVAYK(6)-VLADKQTDR(5)	7	5.5e-09
292	Y22D7AL.5a(461)-Y22D7AL.5a(443)	KALTQPIATIVK(1)-SLTALKNYK(6)	7	1.16e-08
293	K07H8.6a(84)-K07H8.6a(300)	MQLQKTR(5)-KTEIK(1)	7	1.99e-08
294	T01C3.6(107)-T01C3.6(103)	ELKNIFAAYDK(3)-YVDEQSKR(7)	7	2.13e-08
295	F52B5.6(110)-F52B5.6(53)	AVHALYNVKAVK(9)-KSAPAR(1)	7	3.68e-08
296	K07H8.6a(400)-K07H8.6a(436)	HVAEHKDEK(6)-KNIAPLK(1)	7	4.11e-08
297	F45E1.6(57)-F45E1.6(65),Y49E10.6a(57)-Y49E10.6a(65)	YQKSTELLIR(3)-KLPFQR(1)	7	1.48e-07
298	C15F1.6(291)-C15F1.6(57)	NYLKEFPDYPK(4)-GKPLADDQK(2)	7	1.85e-07
299	C07H6.5(277)-C07H6.5(408)	KLQINQSIIFCNSTQR(1)-IEPIPKTVDPK(6)	7	2.34e-07
300	T24H7.1(146)-T24H7.1(165)	GVVAKFNASQLITQR(5)-KTLIER(1)	7	2.71e-07
301	T14G8.3a(455)-T14G8.3a(451),T14G8.3b(439)-T14G8.3b(435)	KSLFGENYPVPNR(1)-TEEGTMKPIR(7)	7	1.42e-06
302	F27C1.7a(67)-F27C1.7a(92),F27C1.7b(88)-F27C1.7b(113)	KFQEFVLDPTLK(1)-TAIEAISTKLGLTK(9)	7	5.6e-06
303	R05G6.7(64)-R05G6.7(38)	YKIPQYGITLTEK(2)-AGDNKEVEFK(5)	7	7.77e-06
304	T05G5.6(42)-T05G5.6(282)	VGEKQNVALIK(4)-KPQWESK(1)	7	8.4e-06
305	C04F6.1(1353)-C04F6.1(572),F59D8.1(1353)-F59D8.1(572),F59D8.2(1353)-F59D8.2(572)	INKNSEELLVK(3)-QNKPELR(3)	7	1.61e-05
306	F11C3.3(1468)-F11C3.3(1460)	KTDDLAAELDGAQR(1)-GFDKIIDEWRK(4)	6	1.16e-15
307	C04F6.1(1031)-C04F6.1(915),F59D8.1(1031)-F59D8.1(915),F59D8.2(1031)-F59D8.2(915)	VTIGNLEKTDLSEIKFDK(8)-KNTLEITHK(1)	6	1.47e-15
308	F31E3.5(186)-F31E3.5(179),R03G5.1a(186)-R03G5.1a(179)	IGYNPKAVPFVPISGFNGDNMLEVSSNMPWFK(6)-FTEITNEVSGFIKK(13)	6	8.77e-14
309	B0348.6a(196)-B0348.6a(207),B0348.6b(199)-B0348.6b(210),B0348.6c(198)-B0348.6c(209)	YEVHKDSSAR(5)-TSSTVKPR(6)	6	2.76e-12
310	C06H2.1(129)-C06H2.1(121)	WAKAPPVEHFDR(3)-VADGLQEAKK(9)	6	2.8e-12
311	T08B2.7a(96)-T08B2.7a(63),T08B2.7b(70)-T08B2.7b(37)	ATLDKLQSDESIK(5)-VEKQGDVAVVK(3)	6	1.28e-11
312	F13B10.2a(359)-F13B10.2a(353)	VAHEKINLK(5)-SLITQTKR(7)	6	2.12e-11
313	F54H12.1a(75)-F54H12.1a(50)	ILYGHLDQPKTQDIER(10)-LSQTVKIVK(6)	6	4.64e-11
314	H06O01.1(84)-H06O01.1(93)	VDCTTEKTVCDK(7)-FGVKGFPTLK(4)	6	1.08e-10
315	T05G5.6(280)-T05G5.6(282)	EGMTAFAEKR(9)-KPQWESK(1)	6	1.82e-10
316	B0035.8(32)-B0035.8(83)*	KESYSVYIYR(1)-LAHYNKR(6)	6	2.08e-10
317	F54E7.2(91)-F54E7.2(107)	KIIGEYCGLCK(1)-YDKEGKAR(6)	6	7.23e-10
318	Y106G6H.3a(11)-Y106G6H.3a(2)	KNAENINSR(1)-APAAKPQVK(1)	6	8.13e-10
319	K09F5.2(1104)-K09F5.2(1035)	DYTMNTEVTTVCDKQVR(14)-LTVGQLEKTELSQIK(8)	6	8.63e-10
320	C04F6.1(1353)-C04F6.1(1349),F59D8.1(1353)-F59D8.1(1349),F59D8.2(1353)-F59D8.2(1349)	INKNSEELLVK(3)-FAVLAKK(6)	6	1.19e-09
321	T27E9.1a(254)-T27E9.1a(262)	KDILYKNTLDCAK(6)-KIIQNEGMSAMFK(1), DILYKNTLDCAK(5)-KIIQNEGMSAMFK(1)	6	1.38e-09
322	D2096.8(233)-D2096.8(223)	FLTKTVK(4)-KGANAGK(1)	6	1.6e-09
323	C47E8.5(555)-C47E8.5(546)	KVEKVGVSNR(4)-VIKDILEK(3)	6	2.04e-09
324	F11C3.3(1381)-F11C3.3(1399)	ANADIQQWKAR(9)-ADELEDAKR(8)	6	4.19e-09
325	F55A3.3(433)-F55A3.3(426)	FKEEQENR(2)-LKSNVIK(2)	6	7.79e-09
326	R06C7.10(1648)-R06C7.10(1652)	ANVDAQKNLK(7)-KLFDQVK(1)	6	9.07e-09
327	C42D8.2a(318)-C42D8.2a(953),K09F5.2(318)-K09F5.2(955)	NGDKAEFAPFEKFPLDK(4)-FPGFSKFEYIEAEER(6)	6	1.92e-08
328	C14B9.7(78)-C14B9.7(87)	GAVGIIVNKR(9)-GNILPKR(6)	6	2.76e-08
329	C23G10.3(12)-C23G10.3(2)	KAVIGGIFK(1)-AANQNVTK(1)	6	5.24e-08
330	ZK673.2(123)-ZK673.2(115)	LSKQLVHPASGR(3)-KVLIDR(1)	6	1.81e-07
331	M03F4.2a(292)-M03F4.2a(327),M03F4.2c(278)-M03F4.2c(313),T04C12.4(292)-T04C12.4(327),T04C12.5(292)-T04C12.5(327),T04C12.6(292)-T04C12.6(327)	KDLYANTVLSGGTTMYPGIADR(1)-EITALAPSTMKIK(11)	6	7e-07
332	T05H4.12(117)-T05H4.12(128)	KAEQAAR(1)-NAALKQ(5)	6	2.08e-06
333	F54B3.3(155)-F54B3.3(162)	KQEESVK(1)-KQEQLR(1)	6	2.74e-06
334	T26C12.1(435)-T26C12.1(442)	EKDDEKESANAK(6)-KMEQK(1)	6	7.23e-06
335	F53A2.7(24)-F53A2.7(139)	LKGLSATDLGVVASQAALK(2)-FGTALGKK(7)	6	9.66e-06
336	ZC434.2(14)-ZC434.2(96)	SDGKVVSEIEK(4)-DILILAKR(7)	6	2.82e-05
337	F56B3.5(97)-F56B3.5(100)	CDNVFCSGADLKER(12)-KTMSQQEATR(1)	5	1.79e-17
338	C42D8.2a(1033)-C42D8.2a(745)	LTVGQLEKTELSQIK(8)-IQTGIKLLK(6)	5	2.32e-13
339	F54H12.6(116)-F54H12.6(120)	LAAYAEKK(7)-KAGPIAK(1)	5	7.11e-13
340	C37A2.7(61)-C37A2.7(49)	VKLSSVPSGGSAPAAAAPSGGAAPK(2)-GKTISEVIAQGK(2)	5	1.53e-12
341	C04F6.1(1336)-C04F6.1(1191),F59D8.1(1336)-F59D8.1(1191),F59D8.2(1336)-F59D8.2(1191)	APLTTCYSLVAKDCSEQPR(12)-EYKGIPEYELLIK(3)	5	8.86e-12
342	F10G7.2(484)-F10G7.2(487)	SSEYDTLLAAEANAEKGK(16)-KGLFADK(1)	5	1.67e-11
343	K07H8.6a(1513)-K07H8.6a(1386)	DSKCNYER(3)-FVVLMKK(6)	5	5.22e-11
344	F17C11.9a(9)-F17C11.9a(22)	LYGNKDNFR(5)-VLIAAKLANK(6)	5	1.22e-10
345	R09E12.3(17)-R09E12.3(81)	DLGNAAYKQK(8)-LIAKAMSR(4)	5	2.33e-10
346	C09H10.2(96)-C09H10.2(6)	HFELGGQKK(8)-VNVPKAR(5)	5	1.77e-09
347	H28O16.1a(225)-H28O16.1a(409),H28O16.1d(198)-H28O16.1d(382)	FNDAGDDKKK(9)-VGSAAQTKAMK(8)	5	1.81e-09
348	D1053.1(44)-D1053.1(48)	TVDLLSEEAKSK(10)-LKEINPAAK(2)	5	2.11e-09
349	Y55F3AM.13(210)-Y55F3AM.13(228)	ALAKVGASR(4)-NQTKEKK(4), ALAKVGASR(4)-NQTKEK(4)	5	3.16e-09
350	C53H9.1(22)-C53H9.1(93)	KAVVVKQQDEGVSDR(1)-YSVDVAFDKTNINK(9)	5	4.11e-09
351	C04F6.1(1470)-C04F6.1(1349),F59D8.1(1470)-F59D8.1(1349)	SYLLKNEECEVENDR(5)-FAVLAKK(6)	5	1.27e-08
352	F11C3.3(1372)-F11C3.3(1381)	QLSKANADIQQWK(4)-ANADIQQWKAR(9)	5	1.34e-08
353	F11C3.3(1847)-F11C3.3(1847)	FQDANKNLGR(6)-FQDANKNLGR(6)	5	2.08e-08
354	F11C3.3(1399)-F11C3.3(1399)	ADELEDAKR(8)-ADELEDAKR(8)	5	2.95e-08
355	H14A12.2a(501)-H14A12.2a(278)	LGILTEEQFAQWVKPENMLGPK(22)-KGFAEK(1)	5	3.55e-08
356	F56F3.5(54)-F56F3.5(44)	TQGTKIASEGLK(5)-QVGKTLINR(4)	5	4.09e-08
357	C56G2.6a(61)-C56G2.6a(83),C56G2.6b(78)-C56G2.6b(100),C56G2.6c(78)-C56G2.6c(100)	AGASWAVVTGATDGIGKAYAFELAR(17)-TQSKLDETKK(4)	5	6.32e-08
358	Y39G10AR.8(460)-Y39G10AR.8(420)	KGQTVEPYKN(1)-VTAVKGDAAK(5)	5	8.62e-08
359	F11C3.3(268)-F11C3.3(598)	LASCDIEHYLLEKSR(13)-NKDPLNDTVVSAMK(2)	5	1.28e-07
360	F31E3.5(386)-F31E3.5(219),R03G5.1a(386)-R03G5.1a(219)	KVEDFPK(1)-KEGNASGK(1)	5	2.4e-07
361	Y71F9AL.13a(90)-Y71F9AL.13a(117)	VCVFGDQHHLDEAAAGDIPSMSADDLKK(27)-SYDAFIASESLIKQIPR(13)	5	3.22e-07
362	VC5.3a(1377)-VC5.3a(1372)	KLKDENAEQSEIEK(1)-VAQFKAQYK(5)	5	3.84e-07
363	F59D8.1(281)-F59D8.1(27)	SKVTFVEESKINR(10)-TFSPKSEYVYK(5)	5	5.72e-07
364	F31E3.5(439)-F31E3.5(453),R03G5.1a(439)-R03G5.1a(453)	QTVAVGVIKSVEK(9)-VTKSAQK(3)	5	1.77e-06
365	F10B5.1(91)-F10B5.1(30)	KHPFHVTR(1)-GVPDAKIR(6)	5	6.34e-06
366	F31E3.5(439)-F31E3.5(385),R03G5.1a(439)-R03G5.1a(385)	QTVAVGVIKSVEK(9)-TGKKVEDFPK(3)	5	8.8e-06
367	F23F1.8a(386)-F23F1.8a(390),F23F1.8b(378)-F23F1.8b(382)	EFVIDEDFMKAVR(10)-KVGDAK(1)	5	1.07e-05
368	F10G7.2(383)-F10G7.2(457)	ESGDDKATGGPGR(6)-GLSKVVR(4)	5	2.63e-05
369	C06A8.3(84)-C06A8.3(126)	FIKGQQGQAEAAHQAAVSNFSPAAK(3)-KADADLTAISNDSSLSVQAKGQK(20)	4	4.84e-21
370	C04F6.1(450)-C04F6.1(411),F59D8.1(450)-F59D8.1(411),F59D8.2(450)-F59D8.2(411)	SVQETLYPSEHIADLLIQLAQSPLSEKYEPLR(27)-KSITPLR(1)	4	7.17e-20
371	Y39G8B.1a(262)-Y39G8B.1a(221)	WFVDSGLSAIPKSVTPQR(12)-KDGDPNVLTNEVVAGIAK(1)	4	9.7e-18
372	Y87G2A.5(1003)-Y87G2A.5(996)	KIGDIQSSADYEQK(1)-LQKNQISVK(3)	4	1.26e-15
373	F40F4.2(81)-F40F4.2(53),F40F4.3(79)-F40F4.3(51)	NLFDYSNLTSKK(11)-KLVTFATFK(1)	4	1.65e-13
374	VC5.3a(581)-VC5.3a(600)	CKVYFTPLMTSDELAK(2)-IETLKGDKEAAGALVK(5)	4	3.75e-13
375	F25H5.4a(401)-F25H5.4a(61)	MVPTSDKGR(7)-KDEQER(1)	4	1.94e-11
376	K06A5.6(267)-K06A5.6(213)	GYKYAIECLNAGR(3)-GYKGITCFLVDR(3)	4	2.68e-11
377	C09H10.2(15)-C09H10.2(6)	TFCDGKCR(6)-VNVPKAR(5)	4	4.58e-11
378	F10G7.2(327)-F10G7.2(367)	LWKSYQPTSSAYSGDRK(3)-DDGSEVKLHLSSIR(7), LWKSYQPTSSAYSGDR(3)-DDGSEVKLHLSSIR(7)	4	5.88e-11
379	C41D11.2(298)-C41D11.2(301)	GDPTIPMDDIKR(11)-IKAPQLQTR(2)	4	8.05e-11
380	C27H6.2(28)-C27H6.2(287)	LAPIEEVKPTPKQIK(12)-KTEVTDR(1)	4	9.14e-11
381	T11G6.1a(310)-T11G6.1a(313)	MSQLPDLGQNDKFK(12)-KGAEELK(1)	4	2.26e-10
382	F10B5.1(91)-F10B5.1(39)	KHPFHVTR(1)-IFDLGNKR(7)	4	2.42e-10
383	F25H2.11(180)-F25H2.11(1)	EAIIEEKC(7)-MLIYK(1)	4	5.82e-10
384	Y24D9A.4a(26)-Y24D9A.4a(35)	AQTQVQKEVK(7)-NPLFEKR(6)	4	1.35e-09
385	F25H5.4a(506)-F25H5.4a(2)	VAVEAKNPADLPK(6)-VNFTVDEIR(1)	4	1.83e-09
386	M01F1.2(92)-M01F1.2(101)	GMLPHKTNR(6)-GNEALKNLR(6)	4	2.6e-09
387	F41C3.5(377)-F41C3.5(381)	QYTDMTPFIKK(10)-IVKNHVR(3)	4	2.64e-09
388	T27E9.1a(169)-T27E9.1a(158)	IVKSDGPIGLYR(3)-EFKGLADCLIK(3)	4	4.41e-09
389	Y105E8B.1a(35)-Y105E8B.1a(28),Y105E8B.1d(35)-Y105E8B.1d(28),Y105E8B.1g(35)-Y105E8B.1g(28)	QITEKLER(5)-ADAAEEKVR(7)	4	1.23e-08
390	T22F3.3a(880)-T22F3.3a(64)	EIWGIDQFESSLPAPYENEKSE(20)-KAFNR(1)	4	2.25e-08
391	F25H5.4a(439)-F25H5.4a(420)	KEDLYEKTIQR(7)-VATGMKAR(6), EDLYEKTIQR(6)-VATGMKAR(6)	4	2.94e-08
392	F28C6.7a(36)-F28C6.7a(63),F28C6.7b(36)-F28C6.7b(63),F28C6.7c(36)-F28C6.7c(63)	IMSAPLTKELR(8)-HKGNTGR(2)	4	3.6e-08
393	C49H3.11(53)-C49H3.11(155)	GGEKETEWTPVTK(4)-GAIVAAKLAVVPVR(7)	4	3.92e-08
394	F26D10.3(508)-F26D10.3(513)	ITITNDKGR(7)-LSKDDIER(3)	4	5.21e-08
395	C09D4.5(153)-C09D4.5(146)	AKQLADQAQAR(2)-KTENKR(1)	4	8.47e-08
396	T27E9.1a(56)-T27E9.1a(53)	YKGIMDVLIR(2)-AIAVDKR(6)	4	1.19e-07
397	F27D9.5(488)-F27D9.5(205)	TGDITTKYLPEVYPEGFQGTSLSPK(7)-DIGYPVMIKASAGGGGK(9)	4	1.58e-07
398	Y22D7AL.5a(461)-Y22D7AL.5a(116)	KALTQPIATIVK(1)-AIAKEGFESIR(4)	4	2.12e-07
399	C42D8.2a(953)-C42D8.2a(331),K09F5.2(955)-K09F5.2(331)	FPGFSKFEYIEAEER(6)-FPLDKK(5)	4	3.09e-07
400	C32E8.2a(136)-C32E8.2a(121)	KGDSSAEELK(1)-LKEYKAK(5)	4	6.73e-07
401	F56B3.5(185)-F56B3.5(185)	IVGVAKAK(6)-IVGVAKAK(6)	4	8.68e-07
402	T02G5.7(37)-T02G5.7(205)	GSFANFGAVELGTVAAKAAIER(17)-FSEEVVPVSVKTSR(11)	4	1.75e-06
403	C42D8.2a(1040)-C42D8.2a(1068)	TELSQIKYNK(7)-MVKNIQK(3)	4	4.32e-06
404	Y24D9A.8a(313)-Y24D9A.8a(306)	TLEKLIEAK(4)-NFAKDAR(4)	4	5.02e-06
405	Y71A12B.1a(211)-Y71A12B.1a(218)	MRDDAAAYHKLLAK(10)-YSKEEHDAK(3)	4	5.15e-06
406	Y39B6A.20(131)-Y39B6A.20(127)	KFSIQYGSGSCNGYLGK(1)-STTFVKETR(6)	4	1.14e-05
407	C04F6.1(551)-C04F6.1(572),F59D8.1(551)-F59D8.1(572),F59D8.2(551)-F59D8.2(572)	LLKDVMPR(3)-QNKPELR(3)	4	1.87e-05
408	F31E3.5(450)-F31E3.5(219),R03G5.1a(450)-R03G5.1a(219)	SDGSSGKVTK(7)-KEGNASGK(1)	4	3e-05
409	T22H6.2a(406)-T22H6.2a(419)	YIIEANQTDLANAKSAGLDPQLLNR(14)-LKMTPEK(2)	4	6.09e-05
410	ZK721.2(2)-ZK721.2(12)	SEEAGEDAQR(1)-KAAER(1)	4	9.23e-05
411	K07H8.6a(1140)-K07H8.6a(1149)	MEVEAVCNNDFHFCKTQIR(15)-GEELKATIQYVYPQTPR(5)	4	0.000102
412	F59D8.2(1478)-F59D8.2(1349)	NEECEVEKDR(8)-FAVLAKK(6)	3	1.13e-14
413	K12H4.4(124)-K12H4.4(47)	VVMDEIGVKSK(9)-LTVNDVKVR(7)	3	1.69e-12
414	C04F6.1(1201)-C04F6.1(750),F59D8.1(1201)-F59D8.1(750),F59D8.2(1201)-F59D8.2(750)	GIPEYELLIKAAR(10)-KMNIRPR(1)	3	8.18e-12
415	T24B8.1a(105)-T24B8.1a(108)	YIGEIGHGVSAKSR(12)-KGIVER(1)	3	3.74e-11
416	F53A2.7(24)-F53A2.7(211)	LKGLSATDLGVVASQAALK(2)-KGEESFEIDEHPR(1)	3	5.37e-11
417	K08F4.2(367)-K08F4.2(327)	KVLDSPNDTSK(1)-KIYLGGITR(1)	3	9.24e-11
418	C27A2.2a(28)-C27A2.2a(71)	FNVECKNPVEDGILR(6)-SKVSVVSEVPFSK(2)	3	1.34e-10
419	F25H5.4a(506)-F25H5.4a(566)	VAVEAKNPADLPK(6)-KSDPVVSYR(1)	3	2.78e-10
420	C04F6.1(1075)-C04F6.1(1106),F59D8.1(1075)-F59D8.1(1106),F59D8.2(1075)-F59D8.2(1106)	EIQSEQGFKNLITLK(9)-MCKVEMDAR(3)	3	3.72e-10
421	T01C3.7(152)-T01C3.7(133)	NMVVGESVYGEKR(12)-GKEDALATK(2)	3	9.92e-10
422	R05D11.8(343)-R05D11.8(500)	KEFLNECR(1)-KVQTINR(1)	3	1.11e-09
423	F11C3.3(1286)-F11C3.3(1286)	QLQDFTSLKGR(9)-QLQDFTSLKGR(9)	3	1.17e-09
424	F56D12.1a(142)-F56D12.1a(138)	MKLNASTMLGQGK(2)-AADLAAGKYR(8)	3	1.34e-09
425	F31E3.5(450)-F31E3.5(457),R03G5.1a(450)-R03G5.1a(457)	SDGSSGKVTK(7)-SAQKAAPK(4)	3	2.15e-09
426	Y22D7AL.5a(95)-Y22D7AL.5a(63)	LIQDVANKANEEAGDGTTCATVLAR(8)-NVIIEQSWGSPKITK(12)	3	2.47e-09
427	H28O16.1a(509)-H28O16.1a(224),H28O16.1d(482)-H28O16.1d(197)	SSQQALLKTIR(8)-FNDAGDDKKK(8)	3	2.52e-09
428	Y105E8B.1a(168)-Y105E8B.1a(161),Y105E8B.1d(168)-Y105E8B.1d(161),Y105E8B.1g(168)-Y105E8B.1g(161)	KLAMVEADLER(1)-KYDEVAR(1)	3	3.03e-09
429	ZK829.4(523)-ZK829.4(505)	TAAYANSIEKVYNTYR(10)-TAHKYNLGLDIR(4)	3	3.07e-09
430	ZC434.2(96)-ZC434.2(102)	DILILAKR(7)-ILPKPQR(4)	3	3.5e-09
431	Y71H10A.1a(750)-Y71H10A.1a(753)	SAHTATLLGLKGR(11)-KVVFTPVQDLK(1)	3	4.09e-09
432	H28O16.1a(160)-H28O16.1a(117),H28O16.1d(133)-H28O16.1d(90)	VEVKAPGIIPR(4)-EGDIVKR(6)	3	6.66e-09
433	K09F5.2(1067)-K09F5.2(1074)	REYFTKMVK(6)-SIQKEQGYK(4), EYFTKMVK(5)-SIQKEQGYK(4)	3	1.03e-08
434	Y41E3.10a(170)-Y41E3.10a(166)	ATKAGPIAK(3)-LAAYAAKK(7)	3	1.86e-08
435	C42D8.2a(1072)-C42D8.2a(1065)	NIQKEQGYK(4)-EYFNKMVK(5)	3	3.13e-08
436	Y38H6C.1a(78)-Y38H6C.1a(80)	IYAVIIEKK(8)-KAELIEAAK(1)	3	4.2e-08
437	F10G7.1(243)-F10G7.1(241)	KPLTLQAR(1)-ILNETKK(6)	3	4.91e-08
438	Y22D7AL.5a(224)-Y22D7AL.5a(73)	GYISPYFITSAKGAK(12)-DGVTVAKSIDLK(7)	3	7.37e-08
439	F26H9.5(332)-F26H9.5(321)	NMISLKGHR(6)-FLKGSIER(3)	3	7.42e-08
440	C47E8.5(46)-C47E8.5(326)	ELISNASDALDKIR(12)-APFDLFENKK(9)	3	7.85e-08
441	ZK652.4(66)-ZK652.4(52)	LLTVINQTQKQELR(10)-KNIAR(1)	3	2.17e-07
442	Y37E3.8a(133)-Y37E3.8a(136)	FFSHEAEQKIK(9)-KAGGACVLVA(1)	3	3.69e-07
443	F11C3.3(427)-F11C3.3(268)	GQNCEQVNWAVGAMAKGLYSR(16)-LASCDIEHYLLEKSR(13)	3	4.17e-07
444	Y55F3AM.13(224)-Y55F3AM.13(210)	GVSFEGEVKNQTK(9)-ALAKVGASR(4)	3	5.04e-07
445	ZK652.4(66)-ZK652.4(14)	LLTVINQTQKQELR(10)-KDALQK(1)	3	5.06e-07
446	K01G5.4(70)-K01G5.4(98)	FNVWDTAGQEKFGGLR(11)-VTYKNVPNWHR(4)	3	1.1e-06
447	F25H5.4a(506)-F25H5.4a(492)	VAVEAKNPADLPK(6)-VMKFSVSPVVR(3)	3	2.25e-06
448	F40F8.10(65)-F40F8.10(92)	ELLTLEDKDPK(8)-MKLDYVLGLK(2)	3	2.63e-06
449	K07H8.6a(359)-K07H8.6a(400)	MFSLMAKQIEQGEAELEAAHTVAR(7)-HVAEHKDEK(6)	3	7.97e-06
450	Y71H2AM.23(473)-Y71H2AM.23(476)	LGFNPYGDMVEKR(12)-LKPDFSNSPK(2)	3	9.02e-06
451	K08E3.5c(294)-K08E3.5c(322)	ADVKGGTLIQYEGR(4)-DYVDEFKSISK(7)	3	1.38e-05
452	F25H5.4a(90)-F25H5.4a(256)	DLEFVKGENQFETVEVDGK(6)-LMKNLWGDR(3)	3	1.56e-05
453	T24B8.1a(120)-T24B8.1a(108)	AAQLNIKLTNGNAR(7)-KGIVER(1)	3	1.65e-05
454	K07C11.5(49)-K07C11.5(59)	VGKQGLPEGSER(3)-KGLNNLR(1)	3	1.73e-05
455	ZK1010.1(63)-ZK1010.1(48)	TLSDYNIQKESTLHLVLR(9)-LIFAGKQLEDGR(6)	3	2.37e-05
456	Y105E8B.1a(233)-Y105E8B.1a(248), Y105E8B.1c(205)-Y105E8B.1c(220), Y105E8B.1d(233)-Y105E8B.1d(248), Y105E8B.1e(205)-Y105E8B.1e(220), Y105E8B.1g(233)-Y105E8B.1g(248)	LKEAETR(2)-SVQKLQK(4)	3	3.36e-05
457	C04F6.1(1353)-C04F6.1(1490),F59D8.1(1353)-F59D8.1(1490),F59D8.2(1353)-F59D8.2(1490)	INKNSEELLVK(3)-NKWNR(2)	3	5.93e-05
458	C47E8.5(552)-C47E8.5(546)	KVEKVGVSNR(1)-VIKDILEK(3)	3	7.79e-05
459	C04F6.1(1100)-C04F6.1(750),F59D8.1(1100)-F59D8.1(750),F59D8.2(1100)-F59D8.2(750)	TVCDKWIR(5)-KMNIRPR(1)	3	9.31e-05
Filtering criteria: FDR < 5%, E-value < 0.01, spectral count ≥ 3. Identified cross-links are sorted and assigned as described in Figure 4—source data 1. *When an inter-linked peptide is attributed to more than five pairs of lysine residues at the protein level (as one or two peptides of the inter-link are assigned to multiple protiens), only one of them is given for clarity.
