# Supplementary material for: Trifunctional cross-linker for mapping protein-protein interaction networks and comparing protein conformational states
Source: eLife journal article supplement (doi:10.7554/elife.12509), 2016-03-03
Supplement: supp [file elife-12509-supp-v1.zip › elife_poa_e12509_Figure_5_source_data_4.xlsx]

## Sheet: Sheet1
Figure 5—source data 4. CXMS analysis of C. elegans mitochondrial proteins
No.	Protein1-Protein2	Peptide1-Peptide2	#Spectra	Best E-value
Inter-molecular Cross-links
1	F27C1.7a(92)-H28O16.1d(2),F27C1.7b(113)-H28O16.1d(2)	TAIEAISTKLGLTK(9)-AGASGSEVSKILEER(1), TAIEAISTKLGLTK(9)-AGASGSEVSK(1), KTAIEAISTKLGLTK(10)-AGASGSEVSK(1)	76	2.34e-13
2	T05H4.12(103)-C06H2.1(107)	VDSAVQSALEGQTLASLLEGVKK(22)-IKLHEVK(2)	62	6.32e-12
3	K09F5.2(725)-C42D8.2a(803)	YVQMALEKLESIEK(8)-FTSNGKVQFSEIR(6)	61	1.34e-10
4	C06H2.1(61)-H28O16.1d(2)	KALPAHSAVLDSLQK(1)-AGASGSEVSK(1)	38	2.09e-13
5	F02E8.1(255)-H28O16.1d(2)	RIDYLKETEESK(6)-AGASGSEVSK(1), IDYLKETEESK(5)-AGASGSEVSK(1)	37	2.22e-10
6	T05H4.12(117)-C06H2.1(122)	KAEQAAR(1)-KVEEK(1)	37	3.99e-06
7	T05H4.12(48)-H28O16.1d(2)	NAGNLANSDPAVKK(13)-AGASGSEVSK(1)	34	4.13e-16
8	T05H4.12(35)-H28O16.1d(2)	EIAKNAGNLANSDPAVK(4)-AGASGSEVSK(1), EIAKNAGNLANSDPAVKK(4)-AGASGSEVSK(1)	34	1.2e-14
9	H28O16.1d(11)-F27C1.7a(92),H28O16.1d(11)-F27C1.7b(113)	AGASGSEVSKILEER(10)-KTAIEAISTKLGLTK(10), AGASGSEVSKILEER(10)-TAIEAISTKLGLTK(9)	33	5.11e-10
10	H28O16.1d(2)-F27C1.7a(67),H28O16.1d(2)-F27C1.7b(88)	AGASGSEVSK(1)-KFQEFVLDPTLK(1), AGASGSEVSKILEER(1)-KFQEFVLDPTLK(1)	30	3.33e-11
11	F02E8.1(261)-H28O16.1d(2)	ETEESKAR(6)-AGASGSEVSK(1), IDYLKETEESKAR(11)-AGASGSEVSK(1)	29	8.99e-11
12	C34E10.6(460)-Y69A2AR.18a(119)	SLQDIIAILGMDELSEEDKLTVSR(19)-EAKNILNNAGDK(3), SLQDIIAILGMDELSEEDKLTVSR(19)-EAKNILNNAGDKEIR(3)	28	7.91e-17
13	C42D8.2a(803)-K09F5.2(731)	FTSNGKVQFSEIR(6)-LESIEKESTTVVR(6)	24	3.35e-10
14	F35G12.10(259)-H28O16.1d(2)	ETEETKAR(6)-AGASGSEVSK(1)	20	1.61e-10
15	F35G12.10(253)-H28O16.1d(2)	IEYLKETEETK(5)-AGASGSEVSK(1), RIEYLKETEETK(6)-AGASGSEVSK(1)	20	1.15e-09
16	K07H8.6a(1005)-C04F6.1(1201),K07H8.6a(1005)-F59D8.1(1201),K07H8.6a(1005)-F59D8.2(1201)	QYPEPIEMTYMLPAHKQLSQSLDR(16)-GIPEYELLIKAAR(10)	19	3.29e-09
17	C34E10.6(460)-C29E4.12(23)	SLQDIIAILGMDELSEEDKLTVSR(19)-NIISELKK(7)	19	2.03e-06
18	K07H8.6a(98)-C04F6.1(1490),K07H8.6a(98)-F59D8.1(1490),K07H8.6a(98)-F59D8.2(1490)	FATSQQESNSMKMLPFER(12)-NKWNR(2)	19	1.63e-05
19	C06H2.1(75)-T05H4.12(72)	ALPAHSAVLDSLQKQYESVK(14)-FQLANADVVSKLPTNFEAAK(11)	18	2.28e-12
20	F35G12.10(215)-C06H2.1(107)	TSAAQTASFAALKEGMPTSLK(13)-IKLHEVK(2)	17	4.71e-09
21	C04F6.1(166)-K07H8.6a(586),F59D8.1(166)-K07H8.6a(586),F59D8.2(166)-K07H8.6a(586)	DMESDKDSLFFNVHEK(6)-TQMPTKIQR(6)	16	4.58e-08
22	H28O16.1a(491)-C34E10.6(435),H28O16.1d(464)-C34E10.6(435)	VDPSAITKFEK(8)-GVQKILQDYK(4)	15	7.38e-11
23	T05H4.12(48)-F02E8.1(261)	NAGNLANSDPAVKK(13)-IDYLKETEESKAR(11), NAGNLANSDPAVKK(13)-ETEESKAR(6)	15	2.49e-09
24	C34E10.6(62)-H28O16.1d(2)	VSAKATAANASGR(4)-AGASGSEVSK(1)	15	3.89e-09
25	T05H4.12(35)-H28O16.1d(11)	EIAKNAGNLANSDPAVK(4)-AGASGSEVSKILEER(10)	15	2.86e-07
26	T05H4.12(128)-C06H2.1(122)	NAALKQ(5)-KVEEK(1)	15	8.64e-07
27	C34E10.6(460)-Y69A2AR.18a(116)	SLQDIIAILGMDELSEEDKLTVSR(19)-GLCGGVHSSIVKEAK(12)	12	3.56e-06
28	F38A1.8(279)-F27C1.7a(67),F38A1.8(279)-F27C1.7b(88)	FVESMKEQIGTLK(6)-KFQEFVLDPTLK(1)	11	0.000213
29	H28O16.1d(11)-F27C1.7a(67),H28O16.1d(11)-F27C1.7b(88)	AGASGSEVSKILEER(10)-KFQEFVLDPTLK(1)	10	6.12e-07
30	C34E10.6(460)-T05F1.1a(355),C34E10.6(460)-T05F1.1b(361)	SLQDIIAILGMDELSEEDKLTVSR(19)-NIELVTKK(7)	10	1.01e-06
31	T05H4.12(48)-F35G12.10(259)	NAGNLANSDPAVKK(13)-ETEETKAR(6)	10	1.8e-06
32	C34E10.1(8)-F54A3.5(2)	TFHKAQTIR(4)-APGASAPAASR(1)	8	4.25e-06
33	K07H8.6a(400)-F20H11.3(109)	HVAEHKDEK(6)-KPGMTR(1)	8	0.000157
34	C06H2.1(129)-T05G5.6(282)	WAKAPPVEHFDR(3)-RKPQWESK(2)	7	1.4e-10
35	C04F6.1(223)-K07H8.6a(217),F59D8.1(223)-K07H8.6a(217),F59D8.2(223)-K07H8.6a(217)	FGSECKECEK(6)-SINFDKCTR(6)	7	4.11e-10
36	Y37D8A.14(112)-F29C4.2(2)	CGAQKNR(5)-VAASATR(1)	7	8.03e-07
37	K07H8.6a(98)-C04F6.1(1573),K07H8.6a(98)-F59D8.1(1573),K07H8.6a(98)-F59D8.2(1573)	FATSQQESNSMKMLPFER(12)-FLKEAR(3)	7	2.49e-06
38	K07H8.6a(165)-F59D8.1(1555)	EKYEGAEK(2)-TSNEKIR(5)	7	6.52e-06
39	K07H8.6a(165)-ZC506.1(27)	EKYEGAEK(2)-KKLQK(1)	7	1.39e-05
40	F32D1.2(36)-Y69A2AR.18a(58)	AAVKKPEATLK(4)-YAKAER(3)	7	0.000382
41	F25H5.4a(439)-C04F6.1(750)*	EDLYEKTIQR(6)-KMNIRPR(1)	7	0.000768
42	C06H2.1(34)-H28O16.1a(483),C06H2.1(34)-H28O16.1d(456)	VKGVSGTFQSAVSQLPADLPK(2)-GYLDKVDPSAITK(5)	6	3.47e-09
43	Y69A2AR.18a(55)-F32D1.2(37)	MVAAAKYAK(6)-KPEATLK(1)	6	8.04e-09
44	R53.4(55)-T05H4.12(128)	WNKNVHGPYCHWR(3)-NAALKQ(5)	6	1.16e-07
45	T14G8.3a(303)-C15H9.6(299),T14G8.3a(303)-F43E2.8(296),T14G8.3b(287)-C15H9.6(299),T14G8.3b(287)-F43E2.8(296)	LHKEAER(3)-EVEKAK(4)	6	0.000239
46	C04F6.1(1526)-T21C9.6(939),F59D8.1(1526)-T21C9.6(939),F59D8.2(1526)-T21C9.6(939)	TLIKEFSNR(4)-KSSDELR(1)	6	0.000365
47	D1007.12(139)-T07A9.11(84)	KASQPKTQQK(6)-KFEPK(1)	5	4.74e-08
48	H28O16.1a(409)-C34E10.6(528),H28O16.1d(382)-C34E10.6(528)	VGSAAQTKAMK(8)-KAEELAK(1)	5	7.29e-06
49	C04F6.1(410)-Y50D7A.9(1),F59D8.1(410)-Y50D7A.9(1),F59D8.2(410)-Y50D7A.9(1)	NTIQHLIHHFEKK(12)-MFSPLR(1)	5	7.07e-05
50	K07A12.5(104)-M153.1(268)	EKELDALR(2)-ATGDKALPR(5)	5	0.000114
51	C34B2.6(403)-C15F1.6(57)	ELGIEKDEKTTIIEK(9)-GKPLADDQK(2)	5	0.000119
52	C42D8.2a(208)-C04F6.1(1566)*	SINFDKCTER(6)-HSKNAR(3)	5	0.000122
53	K07H8.6a(1235)-C04F6.1(1242),K07H8.6a(1235)-F59D8.1(1242),K07H8.6a(1235)-F59D8.2(1242)	LDQYQTVVEYEFEPKPAQYFAR(15)-AYNFWTVSEKR(10)	5	0.000423
54	F32D1.2(37)-Y69A2AR.18a(58)	KPEATLK(1)-YAKAER(3)	5	0.000496
55	C53B7.4(39)-C32A3.2(114),K07A12.3(39)-C32A3.2(114)	AVGKHELAPPR(4)-KLPPK(1)	5	0.000504
56	C42D8.2a(953)-R07E5.8(214),K09F5.2(955)-R07E5.8(214)	FPGFSKFEYIEAEER(6)-MLSTFQARQKSER(10)	5	0.000694
57	H28O16.1a(73)-F27C1.7a(22),H28O16.1a(73)-F27C1.7b(43),H28O16.1d(46)-F27C1.7a(22),H28O16.1d(46)-F27C1.7b(43)	VYGLKNIQAEEMVEFDSGIK(5)-AQLVKTPIQVHGVEGR(5)	4	2.02e-17
58	K07H8.6a(279)-F59D8.1(621),K07H8.6a(279)-F59D8.2(621)	SQHLFAPISEKHQLVSAFTLNTMELIYAGEK(11)-QFSKSTNPCYQQLAVR(4)	4	2.48e-13
59	K07H8.6a(98)-C04F6.1(1526),K07H8.6a(98)-F59D8.1(1526),K07H8.6a(98)-F59D8.2(1526)	FATSQQESNSMKMLPFER(12)-TLIKEFSNR(4)	4	8.66e-08
60	C42D8.2a(442)-C36C9.1(818)	TIQETPFPSQSIAEALIKFAESRVAK(18)-YLNAKR(5)	4	5.24e-07
61	C42D8.2a(1203)-F37C12.7(62)	QFNGMPEYELLIKAAR(13)-LRKSER(3)	4	4.69e-06
62	C31H5.6a(2)-T14G8.3a(807),C31H5.6a(2)-T14G8.3b(791)	MKHLHIDK(2)-KDLFEK(1)	4	1.01e-05
63	K07H8.6a(84)-C04F6.1(1490),K07H8.6a(84)-F59D8.1(1490),K07H8.6a(84)-F59D8.2(1490)	MQLQKTR(5)-NKWNR(2)	4	3.67e-05
64	T24H7.1(2)-ZC513.4(952)	AKQGQEAMK(1)-RKAENAR(2)	4	9.35e-05
65	ZK652.4(14)-F55D10.2(2)	KDALQK(1)-APSAPAK(1)	4	0.000181
66	K07H8.6a(98)-F09B12.3(448)	FATSQQESNSMKMLPFER(12)-AKIFER(2)	4	0.00192
67	T05E11.1(188)-K02B2.5(62)	TIAECLADELINAAKGSSNSYAIK(15)-EVITYKLITPSVVSER(6)	3	3.15e-15
68	K09F5.2(731)-C42D8.2a(917)	LESIEKESTTVVR(6)-IQAVAGMKR(8)	3	6.19e-13
69	C42D8.2a(972)-C04F6.1(1201)*	TVVVPQWQQKTQEIEK(10)-GIPEYELLIKAAR(10)	3	2.46e-11
70	Y69A2AR.18a(55)-R05D3.6(34),Y69A2AR.18a(55)-ZC262.5(34)	MVAAAKYAK(6)-KPQATLK(1)	3	1.63e-10
71	C17E4.9(279)-C08H9.2a(120),F55F3.3(276)-C08H9.2a(120)	NKLVIVECR(2)-AKAEEAR(2)	3	1.57e-07
72	K07H8.6a(586)-C04F6.1(1573),K07H8.6a(586)-F59D8.1(1573),K07H8.6a(586)-F59D8.2(1573)	TQMPTKIQR(6)-FLKEAR(3)	3	5.66e-07
73	Y24D9A.4a(35)-C42C1.14(106)	NPLFEKR(6)-VIKHQK(3)	3	3.13e-06
74	C42D8.2a(766)-K07A12.5(104)	ARPATYTEKDAFAMVYLR(9)-EKELDALR(2)	3	1.25e-05
75	K07H8.6a(84)-C04F6.1(1566),K07H8.6a(84)-F59D8.1(1566),K07H8.6a(84)-F59D8.2(1566)	MQLQKTR(5)-HSKNAR(3)	3	1.52e-05
76	H28O16.1a(509)-C34E10.6(528),H28O16.1d(482)-C34E10.6(528)	SSQQALLKTIR(8)-KAEELAK(1)	3	2.67e-05
77	VC5.3a(173)-F25B4.1(374),VC5.3a(421)-F25B4.1(374)	WMTPEQLGDINALKTAGK(14)-IGTKFVVDFGAK(4)	3	2.85e-05
78	K01H12.2(80)-T27E9.1a(56)	VPKEQGYAALWR(3)-YKGIMDVLIR(2)	3	8.23e-05
79	R05D3.6(33)-Y69A2AR.18a(58),ZC262.5(33)-Y69A2AR.18a(58)	GGANVKKPQATLK(6)-YAKAER(3)	3	0.000171
80	C34E10.6(528)-C04F6.1(1566),C34E10.6(528)-F59D8.1(1566),C34E10.6(528)-F59D8.2(1566)	KAEELAK(1)-HSKNAR(3)	3	0.000219
81	K07H8.6a(352)-R12H7.2(60)	KMFSLMAKQIEQGEAELEAAHTVAR(1)-KYLKTNGNHHFDK(1)	3	0.000223
82	C04F6.1(1041)-K09F5.2(1070),F59D8.1(1041)-K09F5.2(1070),F59D8.2(1041)-K09F5.2(1070)	FDKIFEK(3)-MVKSIQK(3)	3	0.0003
83	C15H9.4(30)-D1007.6(1)	IVQKLIEIK(4)-MFIPK(1)	3	0.000369
84	C04F6.1(1386)-W02D7.4(5),F59D8.1(1386)-W02D7.4(5),F59D8.2(1386)-W02D7.4(5)	KVNPTELEQYNIEILGDNLIVIR(1)-MMLSKVLR(5)	3	0.00048
85	T05H10.6a(392)-C04F6.1(915)*	TSADVLKSIGRA(7)-KNTLEITHK(1)	3	0.000593
86	F59D8.1(1381)-Y38H6C.1a(79)	SDDKFLVKVDEK(8)-KKAELIEAAK(1)	3	0.00096
87	K09F5.2(795)-B0432.3(129)	YKDMDYAILPVDTQLIEKLIEK(18)-KVLEKGSER(1), DMDYAILPVDTQLIEKLIEK(16)-KVLEKGSER(1)	3	0.00106
88	C04F6.1(410)-W02B8.2(358),F59D8.1(410)-W02B8.2(358),F59D8.2(410)-W02B8.2(358)	NTIQHLIHHFEKK(12)-EELEKQR(5)	3	0.00127
89	C42D8.2a(953)-Y57G11C.15a(21),K09F5.2(955)-Y57G11C.15a(21)	FPGFSKFEYIEAEER(6)-PFCGFVPEVSKPER(11)	3	0.00221
Intra-molecular Cross-links
90	H06O01.1(207)-H06O01.1(277)	KLHNKFDTNEFK(5)-VLKVAQNYK(3), LHNKFDTNEFK(4)-VLKVAQNYK(3), LHNKFDTNEFKYDGNYDTDK(4)-VLKVAQNYK(3)	317	3.26e-19
91	C42D8.2a(953)-C42D8.2a(326),K09F5.2(955)-K09F5.2(326)	FPGFSKFEYIEAEER(6)-AEFAPFEKFPLDKK(8), FPGFSKFEYIEAEER(6)-NGDKAEFAPFEKFPLDK(12), FPGFSKFEYIEAEER(6)-AEFAPFEKFPLDK(8)	313	6.32e-17
92	F27C1.7a(67)-F27C1.7a(92),F27C1.7b(88)-F27C1.7b(113)	KFQEFVLDPTLK(1)-KTAIEAISTKLGLTK(10), KFQEFVLDPTLK(1)-TAIEAISTKLGLTK(9)	240	2.28e-24
93	C42D8.2a(1102)-C42D8.2a(1033)	DYTMNTELTTVCDKQVR(14)-LTVGQLEKTELSQIK(8)	210	7.91e-19
94	C04F6.1(861)-C04F6.1(915),F59D8.1(861)-F59D8.1(915),F59D8.2(861)-F59D8.2(915)	VSIELEKLGAR(7)-KNTLEITHK(1)	200	1.22e-14
95	C42D8.2a(1043)-C42D8.2a(1068)	YNKIFEK(3)-MVKNIQKEQGYK(3), YNKIFEK(3)-MVKNIQK(3)	189	3.37e-08
96	T27E9.1a(67)-T27E9.1a(56)	VPKEQGVAALWR(3)-YKGIMDVLIR(2)	180	5.63e-14
97	K09F5.2(1045)-K09F5.2(1070)	YNKIFEK(3)-MVKSIQK(3)	141	7.01e-07
98	C42D8.2a(1388)-C42D8.2a(1383)	KIQSEDYSAYQIER(1)-VKVDGK(2)	139	7.83e-06
99	C04F6.1(1386)-C04F6.1(1372),F59D8.1(1386)-F59D8.1(1372),F59D8.2(1386)-F59D8.2(1372)	KVNPTELEQYNIEILGDNLIVIR(1)-REEEIVVKK(8)	122	7.91e-17
100	C04F6.1(1372)-C04F6.1(1349),F59D8.1(1372)-F59D8.1(1349),F59D8.2(1372)-F59D8.2(1349)	REEEIVVKK(8)-FAVLAKK(6), EEEIVVKK(7)-FAVLAKK(6)	120	1.56e-10
101	K09F5.2(1104)-K09F5.2(1035)	DYTMNTEVTTVCDKQVR(14)-LTVGQLEKTELSQIK(8)	112	9.14e-19
102	K07H8.6a(1140)-K07H8.6a(1072)	MEVEAVCNNDFHFCKTQIR(15)-NYEKVYK(4)	108	4.43e-10
103	K09F5.2(795)-K09F5.2(452)	DMDYAILPVDTQLIEKLIEK(16)-VSKNNQVVR(3), YKDMDYAILPVDTQLIEKLIEK(18)-VSKNNQVVR(3)	107	5.67e-17
104	C42D8.2a(953)-C42D8.2a(833)	FPGFSKFEYIEAEER(6)-KFPTTLGLPLTISGK(1)	105	5.79e-20
105	K09F5.2(1390)-K09F5.2(1385)	KILSEDYSAHQIER(1)-VKVDGK(2)	97	3.54e-06
106	C42D8.2a(766)-C42D8.2a(542)	PATYTEKDAFAMVYLR(7)-KEAIDALR(1), ARPATYTEKDAFAMVYLR(9)-KEAIDALR(1)	92	4.83e-14
107	C04F6.1(410)-C04F6.1(370),F59D8.1(410)-F59D8.1(370),F59D8.2(410)-F59D8.2(370)	NTIQHLIHHFEKK(12)-MCTIEELKK(8)	89	7.74e-24
108	C04F6.1(1381)-C04F6.1(1372),F59D8.2(1381)-F59D8.2(1372)	SDDKFLVKVDGK(8)-EEEIVVKK(7), FLVKVDGK(4)-REEEIVVKK(8), FLVKVDGK(4)-EEEIVVKK(7), SDDKFLVKVDGK(8)-REEEIVVKK(8)	89	2.25e-13
109	C04F6.1(861)-C04F6.1(750),F59D8.1(861)-F59D8.1(750),F59D8.2(861)-F59D8.2(750)	VSIELEKLGAR(7)-KMNIRPR(1), VSIELEKLGAR(7)-KMNIR(1)	84	1.19e-13
110	C04F6.1(804)-C04F6.1(861),F59D8.1(804)-F59D8.1(861),F59D8.2(804)-F59D8.2(861)	NGEFDIKSLLTFLTNDSK(7)-VSIELEKLGAR(7), NGEFDIKSLLTFLTNDSKFELHR(7)-VSIELEKLGAR(7)	79	2.81e-12
111	C42D8.2a(1424)-C42D8.2a(1311)	FDGYTIKTQLPSYSR(7)-HQLTEASGSVCKVQK(12)	76	1.08e-22
112	C05C8.3(101)-C05C8.3(56)	KVIIPPEQGFDEDGDEVEGK(1)-SESGDQLEQFYKLSDK(12), KVIIPPEQGFDEDGDEVEGK(1)-SESGDQLEQFYKLSDKEGK(12)	68	2.82e-20
113	K07H8.6a(300)-K07H8.6a(84)	KTEIKQVR(1)-MQLQKTR(5), KTEIK(1)-MQLQKTR(5)	68	4.81e-09
114	F20H11.3(134)-F20H11.3(161)	DLAAVIAKASPK(8)-KAGVYDPK(1)	68	1.18e-08
115	K07H8.6a(1140)-K07H8.6a(1068)	MEVEAVCNNDFHFCKTQIR(15)-MEKNYEK(3)	66	1.44e-10
116	C04F6.1(1031)-C04F6.1(915),F59D8.1(1031)-F59D8.1(915),F59D8.2(1031)-F59D8.2(915)	VTIGNLEKTDLSEIKFDK(8)-KNTLEITHK(1), VTIGNLEKTDLSEIK(8)-KNTLEITHK(1)	65	2.74e-20
117	C14F11.1a(37)-C14F11.1a(58)	SWWSHVEMGPPDAILGVTEAFKADSNPK(22)-DDQGKPFVLPSVK(5)	61	3.72e-17
118	C04F6.1(1031)-C04F6.1(1100),F59D8.1(1031)-F59D8.1(1100),F59D8.2(1031)-F59D8.2(1100)	VTIGNLEKTDLSEIKFDK(8)-TVCDKWIR(5), VTIGNLEKTDLSEIK(8)-TVCDKWIR(5)	61	1.71e-05
119	C04F6.1(1573)-C04F6.1(1490),F59D8.1(1573)-F59D8.1(1490),F59D8.2(1573)-F59D8.2(1490)	RFLKEAR(4)-NKWNR(2), FLKEAR(3)-NKWNR(2)	60	2.4e-05
120	C04F6.1(1386)-C04F6.1(1381),F59D8.2(1386)-F59D8.2(1381)	KVNPTELEQYNIEILGDNLIVIR(1)-SDDKFLVKVDGK(8), KVNPTELEQYNIEILGDNLIVIR(1)-FLVKVDGK(4)	59	7.47e-11
121	T26C12.1(435)-T26C12.1(442)	EKDDEKESANAK(6)-KMEQK(1), DDEKESANAK(4)-KMEQK(1)	57	1.39e-06
122	C34E10.6(489)-C34E10.6(528)	FLSQPFQVAEVFTGHQGKFVSLEETIR(18)-KAEELAK(1)	56	9.06e-11
123	C42D8.2a(753)-C42D8.2a(745)	ELAQKMNIR(5)-IQTGIKLLK(6)	55	5.98e-11
124	C42D8.2a(157)-C42D8.2a(208),K09F5.2(157)-K09F5.2(208)	NEIEKIESSYDK(5)-SINFDKCTER(6), NEIEKIESSYDKEEQSEENTSFFTNEK(5)-SINFDKCTER(6)	52	1.39e-06
125	T27E9.1a(27)-T27E9.1a(67)	FLIDLASGGTAAAVSKTAVAPIER(16)-VPKEQGVAALWR(3)	51	1.43e-15
126	K07H8.6a(1140)-K07H8.6a(1101)	MEVEAVCNNDFHFCKTQIR(15)-KFEWLQNEK(1)	50	2.81e-16
127	T27E9.1a(158)-T27E9.1a(169)	ANDREFKGLADCLIK(7)-IVKSDGPIGLYR(3), EFKGLADCLIK(3)-IVKSDGPIGLYR(3)	50	2.07e-15
128	C42D8.2a(777)-C42D8.2a(542)	YKDMDYAFLPIDR(2)-KEAIDALR(1)	49	1.79e-10
129	K07H8.6a(217)-K07H8.6a(165)	SINFDKCTR(6)-KEKYEGAEK(3), SINFDKCTR(6)-EKYEGAEK(2)	49	5.63e-10
130	R02D3.1a(58)-R02D3.1a(54),R02D3.1b(58)-R02D3.1b(54)	LTKSGVNVLIQPSNR(3)-APLAPTHVKR(9), LTKSGVNVLIQPSNR(3)-RAPLAPTHVKR(10)	48	8.69e-20
131	C42D8.2a(953)-C42D8.2a(331),K09F5.2(955)-K09F5.2(331)	FPGFSKFEYIEAEER(6)-FPLDKK(5), FPGFSKFEYIEAEER(6)-AEFAPFEKFPLDKK(13)	48	1.06e-08
132	K07H8.6a(748)-K07H8.6a(744)	KLLSNVQEK(1)-NMEKIIK(4)	46	9.6e-06
133	K07H8.6a(1101)-K07H8.6a(1076)	KFEWLQNEK(1)-KHNGR(1)	45	4.83e-07
134	T27E9.1a(67)-T27E9.1a(37)	VPKEQGVAALWR(3)-VKLLLQVQDASK(2)	44	2.13e-14
135	C04F6.1(472)-C04F6.1(223),F59D8.1(472)-F59D8.1(223),F59D8.2(472)-F59D8.2(223)	GFASKTQDLPLIRPASR(5)-FGSECKECEK(6), GFASKTQDLPLIR(5)-FGSECKECEK(6)	44	7.77e-12
136	K07H8.6a(1140)-K07H8.6a(1076)	MEVEAVCNNDFHFCKTQIR(15)-KHNGR(1)	44	1.2e-09
137	C04F6.1(472)-C04F6.1(551),F59D8.1(472)-F59D8.1(551),F59D8.2(472)-F59D8.2(551)	GFASKTQDLPLIRPASR(5)-LLKDVMPR(3), GFASKTQDLPLIR(5)-LLKDVMPR(3)	44	7.33e-07
138	C42D8.2a(637)-C42D8.2a(542),K09F5.2(639)-K09F5.2(544)	VAIVCSKVLSFTR(7)-KEAIDALR(1)	42	8.49e-12
139	C42D8.2a(1351)-C42D8.2a(1383),K09F5.2(1353)-K09F5.2(1385)	DCSEEPTFAVLSKK(13)-VKVDGK(2)	41	3.66e-08
140	C42D8.2a(797)-C42D8.2a(450)	QLVENLIEKFTSNGK(9)-VAKNNLVVR(3)	40	2.56e-09
141	C42D8.2a(1203)-C42D8.2a(1424)	QFNGMPEYELLIKAAR(13)-FDGYTIKTQLPSYSR(7)	38	3.19e-14
142	H06O01.1(459)-H06O01.1(408)	EVKDFVSFISK(3)-YEELAEKLNKEDVIIAK(7), EVKDFVSFISK(3)-YEELAEKLNK(7)	38	6.63e-14
143	C04F6.1(1381)-C04F6.1(1349),F59D8.2(1381)-F59D8.2(1349)	FLVKVDGK(4)-FAVLAKK(6), SDDKFLVKVDGK(8)-FAVLAKK(6)	38	9.11e-09
144	C42D8.2a(1527)-C42D8.2a(1520)	KSDLVEK(1)-SQKNQR(3), KSDLVEK(1)-KSQKNQR(4)	37	7.56e-09
145	K07H8.6a(1376)-K07H8.6a(748)	DCGSEKSEPR(6)-KLLSNVQEK(1)	36	3.04e-10
146	F20H11.3(245)-F20H11.3(109)	IQDAGTEVVNAKAGAGSATLSMALAGAR(12)-KPGMTR(1)	36	7.34e-10
147	K09F5.2(955)-K09F5.2(835)	FPGFSKFEYIEAEER(6)-KFPTTLGLPLIVSGK(1)	35	2.74e-17
148	K07H8.6a(1170)-K07H8.6a(1101)	TVEELKEQKYR(9)-KFEWLQNEK(1)	35	3.47e-17
149	C04F6.1(27)-C04F6.1(281),F59D8.1(27)-F59D8.1(281),F59D8.2(27)-F59D8.2(281)	TFSPKSEYVYK(5)-VTFVEESKINR(8)	34	6.71e-15
150	T05G5.6(226)-T05G5.6(282)	LGEKIADQSPLIVQMAK(4)-KPQWESK(1)	34	4.85e-14
151	K07H8.6a(400)-K07H8.6a(436)	HVAEHKDEK(6)-KNIAPLK(1)	33	8.52e-14
152	C04F6.1(1422)-C04F6.1(1201),F59D8.1(1422)-F59D8.1(1201),F59D8.2(1422)-F59D8.2(1201)	FDGYTVKTNMPSVASQNQLCGLCGNNDGER(7)-GIPEYELLIKAAR(10)	32	6.92e-13
153	C04F6.1(915)-C04F6.1(750),F59D8.1(915)-F59D8.1(750),F59D8.2(915)-F59D8.2(750)	KNTLEITHK(1)-KMNIRPR(1), KNTLEITHK(1)-KMNIR(1)	32	2.87e-12
154	F20H11.3(88)-F20H11.3(134)	VTAHTGPKELYAAVENADVIVIPAGVPR(8)-DLAAVIAKASPK(8)	31	2.19e-13
155	K07H8.6a(1513)-K07H8.6a(1386)	DSKCNYER(3)-FVVLMKK(6)	31	2.33e-11
156	K07H8.6a(1270)-K07H8.6a(1076)	KNMIR(1)-KHNGR(1)	31	8.73e-05
157	T14G8.3a(455)-T14G8.3a(451),T14G8.3b(439)-T14G8.3b(435)	KSLFGENYPVPNR(1)-TEEGTMKPIR(7)	30	1.87e-12
158	K07H8.6a(1068)-K07H8.6a(1076)	MEKNYEK(3)-KHNGR(1)	30	2.37e-07
159	E04F6.5a(577)-E04F6.5a(577)	FLKDAGSGVENASK(3)-FLKDAGSGVENASK(3)	29	1.51e-09
160	C42D8.2a(978)-C42D8.2a(1281)	TQEIEKVFNFLGLEVSTR(6)-IELKNVQVPR(4)	29	5.01e-09
161	T02G5.8(206)-T02G5.8(202)	SAKAWENGNIGPEVVPVNVK(3)-KDQDEYAINSYKK(12), SAKAWENGNIGPEVVPVNVK(3)-DQDEYAINSYKK(11)	28	2.44e-16
162	T27E9.1a(169)-T27E9.1a(151)	IVKSDGPIGLYR(3)-LAADIGKANDR(7)	28	3.51e-15
163	Y65B4BL.5(377)-Y65B4BL.5(397)	VLAEDIKELKPTVVPVVPR(7)-LYDKVMSEVNK(4)	28	1.89e-14
164	C04F6.1(621)-C04F6.1(636)	QFYKSTNPCYQQLAVR(4)-CSKILLFTR(3)	28	4.76e-12
165	F59D8.2(1478)-F59D8.2(1372)	NEECEVEKDR(8)-REEEIVVKK(8), NEECEVEKDR(8)-EEEIVVKK(7)	27	2.71e-18
166	F42G8.12(252)-F42G8.12(97)	KGPAPLNLHVPAYSFK(1)-DSTKNTQVPAR(4)	27	3.13e-09
167	F59D8.1(1372)-F59D8.1(1381)	REEEIVVKK(8)-FLVKVDEK(4)	27	1.74e-07
168	C42D8.2a(1363)-C42D8.2a(1383),K09F5.2(1365)-K09F5.2(1385)	NSEEMIIKVIR(8)-VKVDGK(2)	27	9.01e-07
169	F32B5.8(36)-F32B5.8(26)	YNLKGCYK(4)-KYSNR(1)	27	3.46e-06
170	T27E9.1a(67)-T27E9.1a(151)	VPKEQGVAALWR(3)-LAADIGKANDR(7)	26	6.58e-15
171	Y22D7AL.5a(63)-Y22D7AL.5a(73)	NVIIEQSWGSPKITK(12)-DGVTVAKSIDLK(7)	26	1.16e-13
172	H06O01.1(202)-H06O01.1(266)	AGYSDDVVVFVPKK(13)-DPKGSNYWR(3)	26	7.88e-11
173	C04F6.1(1361)-C04F6.1(1349),F59D8.1(1361)-F59D8.1(1349),F59D8.2(1361)-F59D8.2(1349)	NSEELLVKVVR(8)-FAVLAKK(6)	26	4.43e-09
174	F27D4.1(302)-F27D4.1(227)	VIVAINKDPDAPIFQVADIGLK(7)-GLKSGDNFK(3)	26	7.39e-08
175	C04F6.1(1336)-C04F6.1(572),F59D8.1(1336)-F59D8.1(572),F59D8.2(1336)-F59D8.2(572)	APLTTCYSLVAKDCSEQPR(12)-QNKPELR(3)	25	4.53e-06
176	Y22D7AL.5a(63)-Y22D7AL.5a(224)	NVIIEQSWGSPKITK(12)-GYISPYFITSAKGAK(12)	24	1.32e-18
177	T27E9.1a(47)-T27E9.1a(67)	LLLQVQDASKAIAVDKR(10)-VPKEQGVAALWR(3), LLLQVQDASKAIAVDK(10)-VPKEQGVAALWR(3)	24	3.65e-08
178	K07H8.6a(1204)-K07H8.6a(1167)	FVKQIEQAPEHETLLEASR(3)-TVEELKEQK(6), KFVKQIEQAPEHETLLEASR(4)-TVEELKEQK(6)	24	3.65e-08
179	F53A2.7(24)-F53A2.7(139)	LKGLSATDLGVVASQAALK(2)-FGTALGKK(7)	24	5.44e-07
180	T05E11.3a(325)-T05E11.3a(319)	KPNQVEEDEYK(1)-VNNVKPIWMR(5)	23	9.26e-13
181	C42D8.2a(208)-C42D8.2a(561),K09F5.2(208)-K09F5.2(563)	SINFDKCTER(6)-IQKVLLPIYK(3), SINFDKCTER(6)-KIQKVLLPIYK(4)	23	1.54e-10
182	T25G3.4(143)-T25G3.4(191)	MVKEALFER(3)-AYDFVSGKR(8)	23	4.17e-10
183	K07H8.6a(1448)-K07H8.6a(1326)	NTLKFDSDDVTVQFDGVNAR(4)-YEQKPVMEK(4)	23	7.16e-10
184	T27E9.1a(158)-T27E9.1a(151)	EFKGLADCLIK(3)-LAADIGKANDR(7)	23	1.21e-09
185	K07H8.6a(217)-K07H8.6a(163)	SINFDKCTR(6)-KEKYEGAEK(1)	23	1.28e-09
186	K09F5.2(805)-K09F5.2(731)	YISNGKVQFSEIR(6)-LESIEKESTTVVR(6)	23	3.95e-09
187	F54A3.5(82)-F54A3.5(2)	HDFASPYVLHGKR(12)-APGASAPAASR(1)	22	3.58e-11
188	F59D8.1(1381)-F59D8.1(1349)	FLVKVDEK(4)-FAVLAKK(6), SDDKFLVKVDEK(8)-FAVLAKK(6)	22	5.46e-08
189	C04F6.1(1361)-C04F6.1(1490),F59D8.1(1361)-F59D8.1(1490),F59D8.2(1361)-F59D8.2(1490)	NSEELLVKVVR(8)-NKWNR(2)	22	1.01e-07
190	T27E9.1a(56)-T27E9.1a(151)	YKGIMDVLIR(2)-LAADIGKANDR(7)	21	5.23e-10
191	F59D8.1(1386)-F59D8.1(1381)	KVNPTELEQYNIEILGDNLIVIR(1)-SDDKFLVKVDEK(8), KVNPTELEQYNIEILGDNLIVIR(1)-FLVKVDEK(4)	21	2.01e-09
192	T27E9.1a(56)-T27E9.1a(53)	YKGIMDVLIR(2)-AIAVDKR(6)	21	2.86e-07
193	C04F6.1(223)-C04F6.1(551),F59D8.1(223)-F59D8.1(551),F59D8.2(223)-F59D8.2(551)	FGSECKECEK(6)-LLKDVMPR(3)	21	5.4e-07
194	T03E6.7a(211)-T03E6.7a(331)	DNHGVDTEESYPYKGR(14)-NNHCGVATKASYPLV(9)	20	4.16e-18
195	ZK673.2(14)-ZK673.2(123)	VLLSGAAGSGKGTIAR(11)-LSKQLVHPASGR(3)	20	1.27e-15
196	Y22D7AL.5a(460)-Y22D7AL.5a(443)	AANEDQQIGVNIVKK(14)-SLTALKNYK(6)	20	3.4e-12
197	C42D8.2a(442)-C42D8.2a(318)	TIQETPFPSQSIAEALIKFAESR(18)-NGDKAEFAPFEK(4)	20	3.21e-11
198	C04F6.1(1100)-C04F6.1(750),F59D8.1(1100)-F59D8.1(750),F59D8.2(1100)-F59D8.2(750)	TVCDKWIR(5)-KMNIRPR(1)	20	6.4e-11
199	C42D8.2a(474)-C42D8.2a(552),K09F5.2(476)-K09F5.2(554)	GIVDYKNIRPLVR(6)-LLKDTMPR(3), GIVDYKNIR(6)-LLKDTMPR(3)	20	3.88e-10
200	K07H8.6a(1448)-K07H8.6a(1338)	NTLKFDSDDVTVQFDGVNAR(4)-IAHHASKQANCVVK(7)	20	9.84e-08
201	F42G8.12(189)-F42G8.12(182)	EKAVPVADLR(2)-TKAEIAK(2)	20	2.06e-07
202	T27E9.1a(11)-T27E9.1a(5)	KFLIDLASGGTAAAVSK(1)-EKSFDTK(2)	20	1.17e-06
203	T14G8.3a(55)-T14G8.3a(151),T14G8.3b(39)-T14G8.3b(135)	IGLVKPGVPMDIVLNKESR(16)-KVTEAYADQTVK(1)	19	2.39e-17
204	C42D8.2a(803)-C42D8.2a(917)	FTSNGKVQFSEIR(6)-IQAVAGMKR(8)	19	2.46e-15
205	C55B7.4a(275)-C55B7.4a(221)	GYKYAIECLNAGR(3)-YKGITCFIVER(2)	19	2.28e-14
206	K07H8.6a(1204)-K07H8.6a(1170)	FVKQIEQAPEHETLLEASR(3)-TVEELKEQKYR(9)	19	5.39e-13
207	F02E8.1(248)-F02E8.1(255)	KNVQSVATELKR(11)-IDYLKETEESK(5), NVQSVATELKR(10)-IDYLKETEESK(5)	19	8.97e-13
208	ZK829.4(67)-ZK829.4(505)	LAEELKSNSLSQK(6)-TAHKYNLGLDIR(4)	19	2.03e-12
209	C42D8.2a(715)-C42D8.2a(542),K09F5.2(717)-K09F5.2(544)	YFAQIGFSQQHMDKYVQMALEK(14)-KEAIDALR(1)	19	1.59e-11
210	F35G12.2(191)-F35G12.2(197)	VVESLKVVTR(6)-EKSEQITR(2)	19	4.51e-10
211	ZK829.4(161)-ZK829.4(125)	CAVVDVPFGGAKGGVK(12)-TPTKGGIR(4)	19	3.71e-09
212	ZK673.2(123)-ZK673.2(115)	LSKQLVHPASGR(3)-KVLIDR(1)	19	7.33e-09
213	Y22D7AL.5a(461)-Y22D7AL.5a(443)	KALTQPIATIVK(1)-SLTALKNYK(6)	19	2.87e-07
214	T27E9.1a(96)-T27E9.1a(67)	YFPTQAMNFAFKDTYK(12)-VPKEQGVAALWR(3)	18	5.01e-18
215	C42D8.2a(1424)-C42D8.2a(1299)	FDGYTIKTQLPSYSR(7)-SVKHQLTEASGSVCK(3)	18	1.33e-13
216	Y57G11C.15a(385)-Y57G11C.15a(392)	TWIDVSGSSAKDVAK(11)-QLKEQQMVMR(3)	18	1.82e-11
217	T08B2.7a(184)-T08B2.7a(78),T08B2.7b(158)-T08B2.7b(52)	KTLLSLPEVMLGLLPGAGGTQR(1)-IDLPNTKENVLNK(7)	18	5.06e-09
218	C04F6.1(1353)-C04F6.1(1490),F59D8.1(1353)-F59D8.1(1490),F59D8.2(1353)-F59D8.2(1490)	INKNSEELLVK(3)-NKWNR(2)	18	7.86e-05
219	C04F6.1(804)-C04F6.1(915),F59D8.1(804)-F59D8.1(915),F59D8.2(804)-F59D8.2(915)	NGEFDIKSLLTFLTNDSK(7)-KNTLEITHK(1)	17	6.67e-17
220	F41C3.5(377)-F41C3.5(381)	QYTDMTPFIKK(10)-IVKNHVR(3)	17	4.01e-13
221	C05G5.4(68)-C05G5.4(44)	VVGGVNANKAGTEHLGLPVFK(9)-VIVQGFTGKQGTFHGK(9)	17	7.74e-11
222	Y55F3AM.1(37)-Y55F3AM.1(68)	DNVNVFSMGFHKNPTPEQSGAR(12)-VQLVKHADK(5)	17	3.09e-09
223	C42D8.2a(1605)-C42D8.2a(1537)	QQPLQLDDYPVSFVESVKVPTACVAY(18)-TQIKEFSHR(4)	17	5.62e-09
224	K07H8.6a(1448)-K07H8.6a(1331)	NTLKFDSDDVTVQFDGVNAR(4)-YEQKPVMEKIAHHASK(9)	17	7.18e-09
225	H06O01.1(207)-H06O01.1(266)	KLHNKFDTNEFK(5)-DPKGSNYWR(3), LHNKFDTNEFK(4)-DPKGSNYWR(3)	17	7.25e-08
226	C04F6.1(1372)-C04F6.1(1490),F59D8.1(1372)-F59D8.1(1490),F59D8.2(1372)-F59D8.2(1490)	REEEIVVKK(8)-NKWNR(2)	17	7.05e-07
227	Y71F9B.3(173)-Y71F9B.3(2)	VNSAAGKLANEVR(7)-PVPPQVQK(1)	17	2.83e-06
228	K09F5.2(1042)-K09F5.2(1070)	TELSQIKYNK(7)-MVKSIQK(3)	17	6.81e-05
229	C04F6.1(1573)-C04F6.1(1566),F59D8.1(1573)-F59D8.1(1566),F59D8.2(1573)-F59D8.2(1566)	FLKEAR(3)-HSKNAR(3)	17	0.00028
230	F54F3.4(20)-F54F3.4(45)	VAIVTAATKGIGLAIAER(9)-NQKNVDEAIEYLK(3)	16	5.27e-15
231	K07H8.6a(162)-K07H8.6a(165)	AVINMLQVNILKK(12)-EKYEGAEK(2)	16	9.89e-14
232	Y38A10A.5(355)-Y38A10A.5(362)	EKADEETR(2)-KAEEEAR(1), KEKADEETR(3)-KAEEEAR(1)	16	2.87e-12
233	C04F6.1(1336)-C04F6.1(1361),F59D8.1(1336)-F59D8.1(1361),F59D8.2(1336)-F59D8.2(1361)	APLTTCYSLVAKDCSEQPR(12)-NSEELLVKVVR(8)	16	1.7e-11
234	R02D3.1a(58)-R02D3.1a(274),R02D3.1b(58)-R02D3.1b(274)	LTKSGVNVLIQPSNR(3)-KDHFVPK(1)	16	3.92e-11
235	T05G5.6(99)-T05G5.6(280)	AFAAGADIKEMTNNEFATTFSGSFLSNWTAVSDVK(9)-EGMTAFAEKR(9)	16	2.82e-10
236	C04F6.1(1470)-C04F6.1(1353),F59D8.1(1470)-F59D8.1(1353)	SYLLKNEECEVENDR(5)-INKNSEELLVK(3), SYLLKNEECEVENDR(5)-KINKNSEELLVK(4)	16	8.14e-10
237	W06A7.3b(88)-W06A7.3b(81),W06A7.3c(3165)-W06A7.3c(3158),W06A7.3d(436)-W06A7.3d(429),W06A7.3f(3169)-W06A7.3f(3162)	KTDSEHPFSEILAQDLTLPQEK(1)-KVEAQIK(1)	16	5.09e-09
238	Y22D7AL.5a(461)-Y22D7AL.5a(116)	KALTQPIATIVK(1)-AIAKEGFESIR(4)	16	1.3e-08
239	C42D8.2a(314)-C42D8.2a(326),K09F5.2(314)-K09F5.2(326)	WEQLVEDFFKNGDK(10)-AEFAPFEKFPLDK(8), WEQLVEDFFKNGDK(10)-AEFAPFEKFPLDKK(8)	16	3.88e-07
240	F42G8.12(141)-F42G8.12(173)	EVVQTLVSYKAMAADQR(10)-GKPVFVK(2)	16	1.03e-06
241	M05D6.6(87)-M05D6.6(91)	FTGAADSETGQVPTKWQR(15)-KFLVITK(1)	15	1.14e-11
242	F42A8.2(94)-F42A8.2(54)	IKNEVDPTLTFR(2)-IKTFEIYR(2)	15	2.15e-10
243	T05G5.6(280)-T05G5.6(282)	EGMTAFAEKR(9)-KPQWESK(1)	15	3.94e-10
244	D2030.5(150)-D2030.5(100)	EVMFLHPKDCGGVLIELEQE(8)-SPIQAFLNKNK(9)	15	2.33e-08
245	Y66A7A.6(347)-Y66A7A.6(376)	RPYTSKPGMDTALYNAVR(6)-FFAVKPR(5)	15	3.91e-07
246	C04F6.1(1336)-C04F6.1(1490),F59D8.1(1336)-F59D8.1(1490),F59D8.2(1336)-F59D8.2(1490)	APLTTCYSLVAKDCSEQPR(12)-NKWNR(2)	15	9.71e-06
247	Y66A7A.6(347)-Y66A7A.6(362)	RPYTSKPGMDTALYNAVR(6)-VAKTWLGEYESK(3)	14	2.3e-15
248	K09F5.2(750)-K09F5.2(544)	IQTGITLLKELALK(9)-KEAIDALR(1)	14	1.6e-09
249	T27E9.1a(166)-T27E9.1a(151)	GLADCLIKIVK(8)-LAADIGKANDR(7)	14	3.27e-08
250	C28C12.7a(130)-C28C12.7a(126), C28C12.7b(130)-C28C12.7b(126)	AQKTFDAPAIVCDECQFVVK(3)-ILLEFAKR(7)	14	1.82e-07
251	T20G5.2(368)-T20G5.2(354)	EFALKHLPNDDLFK(5)-KTDPR(1)	14	1.12e-05
252	C42D8.2a(777)-C42D8.2a(552)	YKDMDYAFLPIDR(2)-LLKDTMPR(3)	14	5.01e-05
253	T27E9.1a(37)-T27E9.1a(53)	VKLLLQVQDASK(2)-AIAVDKR(6)	14	7.56e-05
254	F59D8.1(1422)-F59D8.1(1309)	FDGYTVKTNMPSVASQNQLCGLCGNNDGER(7)-TGATCKVGQSEVSTFDNVIYR(6)	13	7.41e-25
255	C42D8.2a(1165)-C42D8.2a(1123),K09F5.2(1167)-K09F5.2(1125)	EVQLSLTSTWGSQKK(14)-SPILEETKEWTLR(8)	13	4.97e-14
256	T05G5.6(209)-T05G5.6(226)	EHGIVSKIFPADQVVGEAVK(7)-LGEKIADQSPLIVQMAK(4)	13	5.2e-13
257	T27E9.1a(37)-T27E9.1a(151)	VKLLLQVQDASK(2)-LAADIGKANDR(7)	13	7.03e-13
258	C04F6.1(1075)-C04F6.1(915),F59D8.1(1075)-F59D8.1(915),F59D8.2(1075)-F59D8.2(915)	EIQSEQGFKNLITLK(9)-KNTLEITHK(1)	13	5.79e-12
259	F35G12.10(253)-F35G12.10(246)	IEYLKETEETK(5)-NVQTISNEIKR(10)	13	1.3e-11
260	C16A3.9(39)-C16A3.9(43)	MTAEEVQDQIVKMAK(12)-KGLRPSQIGVILR(1)	13	7.78e-11
261	C42D8.2a(637)-C42D8.2a(208),K09F5.2(639)-K09F5.2(208)	VAIVCSKVLSFTR(7)-SINFDKCTER(6)	13	1.15e-10
262	ZK829.4(61)-ZK829.4(505)	GAEVIAPKLAEELK(8)-TAHKYNLGLDIR(4)	13	1.08e-09
263	C42D8.2a(803)-C42D8.2a(745)	FTSNGKVQFSEIR(6)-IQTGIKLLK(6)	13	1.38e-09
264	B0546.1(58)-B0546.1(61)	EDEYFYKK(7)-QKAQLQELR(2)	13	2.8e-09
265	F31C3.1(52)-F31C3.1(114)	IVIGLFGKTVPK(8)-FADENFKLK(7)	13	1.93e-06
266	K07H8.6a(1072)-K07H8.6a(1076)	NYEKVYK(4)-KHNGR(1)	13	5.15e-06
267	C42D8.2a(1314)-C42D8.2a(1527),K09F5.2(1316)-K09F5.2(1529)	VQKNQIR(3)-KSDLVEK(1)	13	1.92e-05
268	F59D8.1(1422)-F59D8.1(1303),F59D8.2(1422)-F59D8.2(1303)	FDGYTVKTNMPSVASQNQLCGLCGNNDGER(7)-AMFQQTWEKTGATCK(9)	12	5.22e-10
269	K09F5.2(835)-K09F5.2(326)	KFPTTLGLPLIVSGK(1)-AEFAPFEKFPLDKK(8), KFPTTLGLPLIVSGK(1)-AEFAPFEKFPLDK(8)	12	3.1e-09
270	C42D8.2a(777)-C42D8.2a(637)	YKDMDYAFLPIDR(2)-VAIVCSKVLSFTR(7)	12	8.26e-09
271	F20H11.3(161)-F20H11.3(109)	KAGVYDPK(1)-KPGMTR(1)	12	1.07e-08
272	C04F6.1(1353)-C04F6.1(1349),F59D8.1(1353)-F59D8.1(1349),F59D8.2(1353)-F59D8.2(1349)	INKNSEELLVK(3)-FAVLAKK(6)	12	3.27e-07
273	T27E9.1a(151)-T27E9.1a(249)	LAADIGKANDR(7)-KDILYK(1)	12	4.52e-07
274	C04F6.1(1336)-C04F6.1(1573),F59D8.1(1336)-F59D8.1(1573),F59D8.2(1336)-F59D8.2(1573)	APLTTCYSLVAKDCSEQPR(12)-FLKEAR(3)	12	3.65e-06
275	C42D8.2a(1033)-C42D8.2a(1072)	LTVGQLEKTELSQIK(8)-NIQKEQGYK(4)	12	1.15e-05
276	K07A12.3(54)-K07A12.3(62)	SADIPAIKADWAK(8)-LQKFIETK(3)	12	1.74e-05
277	T20G5.2(193)-T20G5.2(51)	GVAKASYWEYAYEDSMDLLAK(4)-VKSFR(2)	12	0.000441
278	C04F6.1(1422)-C04F6.1(1309),F59D8.2(1422)-F59D8.2(1309)	FDGYTVKTNMPSVASQNQLCGLCGNNDGER(7)-TGATCKVDQSEVSTFDNVIYR(6)	11	1.35e-23
279	C14B1.1(326)-C14B1.1(352)	IVSLADQVEKFKPQEGEDFEAFTNSYLEGK(10)-SAQDLKAQDLPEDWNALPVK(6)	11	5.5e-21
280	C04F6.1(861)-C04F6.1(914),F59D8.1(861)-F59D8.1(914),F59D8.2(861)-F59D8.2(914)	VSIELEKLGAR(7)-FESTVELKK(8)	11	4.13e-17
281	F59D8.2(1478)-F59D8.2(1349)	NEECEVEKDR(8)-FAVLAKK(6)	11	8.26e-15
282	C04F6.1(1422)-C04F6.1(1303)	FDGYTVKTNMPSVASQNQLCGLCGNNDGER(7)-SAMFQQTWEKTGATCK(10)	11	1.3e-14
283	K09F5.2(1426)-K09F5.2(1313)	FDGYTIKTQLPSYSR(7)-HLLNEASGSVCKVQK(12)	11	3.8e-14
284	T27E9.1a(96)-T27E9.1a(109)	YFPTQAMNFAFKDTYK(12)-AIFLEGLDKK(9)	11	7.8e-12
285	C06H2.1(129)-C06H2.1(121)	WAKAPPVEHFDR(3)-VADGLQEAKK(9)	11	6.71e-11
286	Y37E3.9(198)-Y37E3.9(205)	QVAQQEAEKAR(9)-YLVEKAEQMK(5)	11	2.55e-10
287	Y38A10A.5(369)-Y38A10A.5(362)	KKAEEEK(1)-KAEEEAR(1)	11	2.84e-10
288	C42D8.2a(1123)-C42D8.2a(1166),K09F5.2(1125)-K09F5.2(1168)	SPILEETKEWTLR(8)-KSEVTVNAQLQQSK(1)	11	3.09e-10
289	F54H12.1a(75)-F54H12.1a(50)	ILYGHLDQPKTQDIER(10)-LSQTVKIVK(6)	11	4.81e-10
290	K11G12.5(132)-K11G12.5(142)	MQNDSKLPLEQR(6)-NYKHALDGLVR(3)	11	7.83e-10
291	T27E9.1a(67)-T27E9.1a(169)	VPKEQGVAALWR(3)-IVKSDGPIGLYR(3)	11	1.81e-09
292	T27E9.1a(261)-T27E9.1a(249)	NTLDCAKK(7)-KDILYK(1)	11	1.05e-08
293	C42D8.2a(1537)-C42D8.2a(552),K09F5.2(1539)-K09F5.2(554)	TQIKEFSHR(4)-LLKDTMPR(3)	11	2.1e-08
294	C04F6.1(1201)-C04F6.1(1490),F59D8.1(1201)-F59D8.1(1490),F59D8.2(1201)-F59D8.2(1490)	GIPEYELLIKAAR(10)-NKWNR(2)	11	4.56e-08
295	C42D8.2a(442)-C42D8.2a(490)	TIQETPFPSQSIAEALIKFAESR(18)-EKFLR(2), TIQETPFPSQSIAEALIKFAESR(18)-ELKEKFLR(5)	11	1.04e-06
296	T27E9.1a(37)-T27E9.1a(10)	VKLLLQVQDASK(2)-SFDTKK(5)	11	4.05e-05
297	C44E4.3(42)-C44E4.3(63)	NVPLAPADPILGVTEAFKK(18)-DDQGKPFVLR(5)	10	6.05e-17
298	K12H4.4(124)-K12H4.4(47)	VVMDEIGVKSK(9)-LTVNDVKVR(7)	10	1.47e-16
299	T02G5.8(202)-T02G5.8(244)	DQDEYAINSYKK(11)-VNFDKFTSLR(5), KDQDEYAINSYKK(12)-VNFDKFTSLR(5)	10	6.72e-12
300	Y57G11C.15a(392)-Y57G11C.15a(404)	QLKEQQMVMR(3)-EKSMIHELNR(2)	10	1.69e-11
301	B0272.3(60)-B0272.3(300)	LNVTVVDSNQSALEKAQQGIANSLK(15)-KSGEGFYK(1)	10	2.83e-11
302	F53A2.7(211)-F53A2.7(234)	KGEESFEIDEHPR(1)-LKPVFQK(2)	10	3.66e-10
303	T05G5.6(49)-T05G5.6(35)	QNVALIKLNRPK(7)-APEMIKIEK(6)	10	1.31e-09
304	H28O16.1a(483)-H28O16.1a(537), H28O16.1d(456)-H28O16.1d(510)	GYLDKVDPSAITK(5)-DVVVNFLATFKP(11)	10	3.15e-09
305	ZK829.4(523)-ZK829.4(505)	TAAYANSIEKVYNTYR(10)-TAHKYNLGLDIR(4)	10	4.57e-09
306	H14A12.2a(501)-H14A12.2a(278)	LGILTEEQFAQWVKPENMLGPK(22)-KGFAEK(1)	10	9.93e-09
307	C14B1.1(254)-C14B1.1(111)	LSAVTEFTHESAQEIVGGDLKK(21)-SGKPTKYTGGR(6)	10	1.67e-08
308	K07H8.6a(1101)-K07H8.6a(1120)	KFEWLQNEK(1)-FEIKPEVVK(4)	10	6.05e-07
309	C42D8.2a(552)-C42D8.2a(542),K09F5.2(554)-K09F5.2(544)	LLKDTMPR(3)-KEAIDALR(1)	10	9.76e-07
310	M153.1(10)-M153.1(36)	IGFIGAGKMAQALAR(8)-ITADNIIASSPKR(12), IGFIGAGKMAQALAR(8)-ITADNIIASSPKRDEVFLDQCK(12)	10	1.15e-06
311	C42D8.2a(1537)-C42D8.2a(1527),K09F5.2(1539)-K09F5.2(1529)	TQIKEFSHR(4)-KSDLVEK(1)	10	1.98e-06
312	ZK892.2(83)-ZK892.2(25)	MKPDQAFMQGK(2)-KVGTSFR(1)	10	2.46e-06
313	R05G6.7(236)-R05G6.7(14)	AKVNSSSQVAVAATHSLSPALK(2)-SAKDLFNK(3)	10	2.49e-06
314	F53A2.7(208)-F53A2.7(139)	NEIVGITIKGR(9)-FGTALGKK(7)	10	4.1e-06
315	C42D8.2a(1516)-C42D8.2a(1520)	DEEQSDEYSSEETYDYEQENTKK(22)-SQKNQR(3)	10	1.01e-05
316	C06H2.1(129)-C06H2.1(122)	WAKAPPVEHFDR(3)-KVEEK(1)	10	0.000144
317	Y73B6BL.24(346)-Y73B6BL.24(349)	LLNHDPNPIDDHVIYPAELTPKLK(22)-KLADK(1)	10	0.00015
318	F01G4.6a(77)-F01G4.6a(77)	IQVNPEKYTGIATGFR(7)-IQVNPEKYTGIATGFR(7)	10	0.000437
319	C37H5.8(99)-C37H5.8(84)	QAVTNSANTLFATKR(14)-LVGAPAKR(7)	9	1.59e-19
320	F40F4.3(79)-F40F4.3(51)	NLFDYSNLTSKK(11)-KLVTFATFK(1)	9	6.03e-15
321	F54A3.5(20)-F54A3.5(2)	SEDEVGQKIDR(8)-APGASAPAASR(1)	9	1.15e-11
322	C08H9.2a(97)-C08H9.2a(120)	AQAIATATKTR(9)-AKAEEAR(2)	9	2.72e-10
323	K07H8.6a(304)-K07H8.6a(84)	KTEIKQVR(5)-MQLQKTR(5), TEIKQVR(4)-MQLQKTR(5)	9	6.04e-10
324	C42D8.2a(1424)-C42D8.2a(1033),K09F5.2(1426)-K09F5.2(1035)	FDGYTIKTQLPSYSR(7)-LTVGQLEKTELSQIK(8)	9	6.6e-09
325	H28O16.1d(31)-H28O16.1d(2)	ILGTETGINLEETGKVLSIGDGIAR(15)-AGASGSEVSK(1)	9	7.29e-09
326	ZK829.4(169)-ZK829.4(67)	IDPKQYTDYEIEK(4)-LAEELKSNSLSQK(6)	9	2.02e-08
327	F59D8.1(621)-F59D8.1(636),F59D8.2(621)-F59D8.2(636)	QFSKSTNPCYQQLAVR(4)-CSKVLLFTR(3)	9	8.1e-08
328	F59D8.2(1470)-F59D8.2(1349)	SYLLKNEECEVEK(5)-FAVLAKK(6)	9	8.14e-08
329	C04F6.1(1349)-C04F6.1(1566),F59D8.1(1349)-F59D8.1(1566),F59D8.2(1349)-F59D8.2(1566)	FAVLAKK(6)-HSKNAR(3)	9	1.26e-07
330	B0546.1(46)-B0546.1(61)	DAGGAFGKMEAAR(8)-QKAQLQELR(2)	9	1.59e-07
331	H06O01.1(84)-H06O01.1(93)	VDCTTEKTVCDK(7)-FGVKGFPTLK(4)	9	1.5e-06
332	F44E5.1(65)-F44E5.1(53)	AAKAIANVAAAAPAHH(3)-KAEIAR(1)	9	1.78e-06
333	C34E10.6(142)-C34E10.6(62)	GQPVADTGDPIKIPVGPETLGR(12)-VSAKATAANASGR(4)	9	7.86e-06
334	C42D8.2a(637)-C42D8.2a(1584)	VAIVCSKVLSFTR(7)-LLKESR(3)	9	8.89e-06
335	C42D8.2a(127)-C42D8.2a(326)	NGLISELQFDKEDAEWSK(11)-AEFAPFEKFPLDK(8)	9	2.09e-05
336	C04F6.1(750)-C04F6.1(1573),F59D8.1(750)-F59D8.1(1573),F59D8.2(750)-F59D8.2(1573)	KMNIRPR(1)-FLKEAR(3)	9	2.85e-05
337	C42D8.2a(1424)-C42D8.2a(1584)	FDGYTIKTQLPSYSR(7)-LLKESR(3)	9	3.64e-05
338	C04F6.1(1381)-C04F6.1(1490),F59D8.2(1381)-F59D8.2(1490)	FLVKVDGK(4)-NKWNR(2), SDDKFLVKVDGK(8)-NKWNR(2)	9	0.000186
339	C04F6.1(1526)-C04F6.1(1490),F59D8.1(1526)-F59D8.1(1490),F59D8.2(1526)-F59D8.2(1490)	TLIKEFSNR(4)-NKWNR(2)	9	0.000201
340	C04F6.1(27)-C04F6.1(288),F59D8.1(27)-F59D8.1(288),F59D8.2(27)-F59D8.2(288)	TFSPKSEYVYK(5)-KVSGPK(1)	9	0.000324
341	T27E9.1a(27)-T27E9.1a(10)	FLIDLASGGTAAAVSKTAVAPIER(16)-SFDTKK(5)	9	0.000388
342	C04F6.1(1303)-C04F6.1(1201)	SAMFQQTWEKTGATCK(10)-GIPEYELLIKAAR(10)	8	6.61e-23
343	ZK829.4(324)-ZK829.4(481)	VIGIQEYDCAVYNPDGIHPKELEDWK(20)-IAGASEKDIVHSGLEYTMQR(7)	8	4.23e-13
344	F59D8.1(1303)-F59D8.1(1201),F59D8.2(1303)-F59D8.2(1201)	AMFQQTWEKTGATCK(9)-GIPEYELLIKAAR(10)	8	4.84e-13
345	K06A5.6(267)-K06A5.6(213)	GYKYAIECLNAGR(3)-GYKGITCFLVDR(3)	8	6.11e-11
346	R04F11.2(70)-R04F11.2(77)	AVAAAEEAAKK(10)-WLAKDEMR(4)	8	1.47e-10
347	F53G12.10(38)-F53G12.10(27)	VTVAAKNK(6)-TKAAQHK(2)	8	2.24e-10
348	B0336.10(113)-B0336.10(75)	GEMKGSAITGPVAK(4)-KVLQGVVIR(1)	8	8.54e-10
349	ZK829.4(189)-ZK829.4(125)	IAIEFAKK(7)-TPTKGGIR(4)	8	6.06e-09
350	C34E10.6(62)-C34E10.6(528)	VSAKATAANASGR(4)-KAEELAK(1)	8	8.3e-09
351	C42D8.2a(1065)-C42D8.2a(1072)	REYFNKMVK(6)-NIQKEQGYK(4), EYFNKMVK(5)-NIQKEQGYK(4)	8	2.43e-08
352	C37H5.8(270)-C37H5.8(279)	STNGDTFLGGEDFDHALVHHLVGEFKK(26)-EQGVDLTKDPQAMQR(8)	8	2.63e-08
353	C04F6.1(1349)-C04F6.1(1490),F59D8.1(1349)-F59D8.1(1490),F59D8.2(1349)-F59D8.2(1490)	FAVLAKK(6)-NKWNR(2)	8	4.89e-08
354	T27E9.1a(67)-T27E9.1a(249)	VPKEQGVAALWR(3)-KDILYK(1)	8	2.72e-07
355	T27E9.1a(109)-T27E9.1a(111)	AIFLEGLDKK(9)-KDFWK(1)	8	5.45e-07
356	E04F6.5a(577)-E04F6.5a(570)	FLKDAGSGVENASK(3)-AMKSSNR(3)	8	1.38e-06
357	K09F5.2(799)-K09F5.2(452)	LIEKYISNGK(4)-VSKNNQVVR(3)	8	1.47e-06
358	K07H8.6a(1140)-K07H8.6a(1149)	MEVEAVCNNDFHFCKTQIR(15)-GEELKATIQYVYPQTPR(5)	8	1.56e-06
359	K07H8.6a(784)-K07H8.6a(1510)	ASGSFQPTEFLSNLLEKLR(17)-SYLYKDSK(5)	8	2.69e-06
360	T05E11.3a(646)-T05E11.3a(646)	SQAYAKAK(6)-SQAYAKAK(6)	8	7.37e-06
361	C42D8.2a(1533)-C42D8.2a(1520)	SDLVEKTQIK(6)-SQKNQR(3), KSDLVEKTQIK(7)-SQKNQR(3)	8	9.29e-06
362	C42D8.2a(1040)-C42D8.2a(1068)	TELSQIKYNK(7)-MVKNIQK(3)	8	3.07e-05
363	F31E3.5(146)-F31E3.5(219),R03G5.1a(146)-R03G5.1a(219)	EHALLAQTLGVKQLIVACNK(12)-KEGNASGK(1)	8	6.53e-05
364	K09F5.2(1390)-K09F5.2(1493)	KILSEDYSAHQIER(1)-KYDER(1)	8	7.39e-05
365	T05H4.12(117)-T05H4.12(128)	KAEQAAR(1)-NAALKQ(5)	8	8.46e-05
366	F59D8.1(1595)-F59D8.1(1526),F59D8.2(1595)-F59D8.2(1526)	EQTVADLVDFPVSFVESVKIPTACVAY(19)-TLIKEFSNR(4)	8	0.000219
367	C04F6.1(450)-C04F6.1(411),F59D8.1(450)-F59D8.1(411),F59D8.2(450)-F59D8.2(411)	SVQETLYPSEHIADLLIQLAQSPLSEKYEPLR(27)-KSITPLR(1)	7	3.6e-18
368	C42D8.2a(766)-C42D8.2a(777)	ARPATYTEKDAFAMVYLR(9)-YKDMDYAFLPIDR(2)	7	3.06e-13
369	F31E3.5(273)-F31E3.5(255),R03G5.1a(273)-R03G5.1a(255)	VETGIIKPGMVVTFAPQNVTTEVK(7)-LPLQDVYKIGGIGTVPVGR(8)	7	5.04e-12
370	K07H8.6a(784)-K07H8.6a(1505)	ASGSFQPTEFLSNLLEKLR(17)-FAKSYLYK(3)	7	9.32e-11
371	F54H12.1a(75)-F54H12.1a(57)	ILYGHLDQPKTQDIER(10)-LKRPLTLSEK(2)	7	3.29e-10
372	K07H8.6a(431)-K07H8.6a(436)	VTIQQFVDKVQSR(9)-KNIAPLK(1)	7	1.33e-08
373	K09F5.2(444)-K09F5.2(318)	SIQETPFPSQTIAEALIKFAESR(18)-NGDKAEFAPFEK(4)	7	1.38e-08
374	ZK673.2(14)-ZK673.2(115)	VLLSGAAGSGKGTIAR(11)-KVLIDR(1)	7	5.01e-08
375	K09F5.2(1067)-K09F5.2(1074)	REYFTKMVK(6)-SIQKEQGYK(4), EYFTKMVK(5)-SIQKEQGYK(4)	7	2.85e-07
376	F32A11.1(139)-F32A11.1(146)	LAGVELSQSGQQFLAKDLR(16)-LTNKPVTFTVIK(4)	7	1.01e-06
377	T27E9.1a(56)-T27E9.1a(249)	YKGIMDVLIR(2)-KDILYK(1)	7	1.1e-06
378	C53B7.4(114)-C53B7.4(121)	YIFGYLVPADYVSKSTK(14)-TVKEQEALAALEN(3)	7	1.29e-06
379	LLC1.3a(245)-LLC1.3a(253)	LGAEVTAVEFLGHVGGMGIDGEVSKNFQR(25)-SLTKQGFK(4)	7	1.89e-06
380	C56G2.6a(61)-C56G2.6a(83),C56G2.6b(78)-C56G2.6b(100)	AGASWAVVTGATDGIGKAYAFELAR(17)-TQSKLDETKK(4)	7	2.83e-06
381	T09B4.8(408)-T09B4.8(20)	NQGLLIGKGGIHGNVLR(8)-GHVTYYKDQLLITK(7)	7	1.89e-05
382	C42D8.2a(637)-C42D8.2a(1537),K09F5.2(639)-K09F5.2(1539)	VAIVCSKVLSFTR(7)-TQIKEFSHR(4)	7	2.82e-05
383	T20G5.2(51)-T20G5.2(354)	VKSFR(2)-KTDPR(1)	7	0.000154
384	K09F5.2(1529)-K09F5.2(1522)	KSDLVEK(1)-QKNQR(2), KSDLVEK(1)-KQKNQR(3)	7	0.000297
385	C15H9.6(292)-C15H9.6(299),F43E2.8(289)-F43E2.8(296)	AVQKLR(4)-EVEKAK(4), AVQKLR(4)-REVEKAK(5)	7	0.000365
386	C42D8.2a(972)-C42D8.2a(1203)	TVVVPQWQQKTQEIEK(10)-QFNGMPEYELLIKAAR(13)	7	0.000575
387	F59D8.2(1478)-F59D8.2(1353)	NEECEVEKDR(8)-INKNSEELLVK(3)	6	4.06e-16
388	H28O16.1a(225)-H28O16.1a(409), H28O16.1d(198)-H28O16.1d(382)	FNDAGDDKKK(9)-VGSAAQTKAMK(8)	6	5.46e-12
389	C04F6.1(1361)-C04F6.1(750),F59D8.1(1361)-F59D8.1(750),F59D8.2(1361)-F59D8.2(750)	NSEELLVKVVR(8)-KMNIRPR(1)	6	1.4e-11
390	F01G4.6a(196)-F01G4.6a(77)	AEGLTGFYKGLPPLWMR(9)-IQVNPEKYTGIATGFR(7)	6	2.07e-11
391	H06O01.1(202)-H06O01.1(207)	AGYSDDVVVFVPKK(13)-LHNKFDTNEFK(4)	6	1.39e-10
392	T25G3.4(218)-T25G3.4(202)	NESLKGALIYYDGQHNDAR(5)-NSFFINKSQALER(7)	6	2.75e-10
393	Y57A10A.23(69)-Y57A10A.23(73)	SWCHACKALK(7)-KTFQQSNAK(1)	6	3.49e-10
394	T27E9.1a(37)-T27E9.1a(56)	VKLLLQVQDASK(2)-YKGIMDVLIR(2)	6	1.33e-09
395	T05E11.3a(452)-T05E11.3a(445)	KLDGAQFDDFWSEFSTNIK(1)-KVLDMLK(1)	6	1.81e-09
396	C04F6.1(1201)-C04F6.1(1573),F59D8.1(1201)-F59D8.1(1573),F59D8.2(1201)-F59D8.2(1573)	GIPEYELLIKAAR(10)-FLKEAR(3)	6	2.11e-09
397	C04F6.1(1201)-C04F6.1(572),F59D8.1(1201)-F59D8.1(572),F59D8.2(1201)-F59D8.2(572)	GIPEYELLIKAAR(10)-QNKPELR(3)	6	1.04e-08
398	F45H10.2(81)-F45H10.2(73)	KNPADFANDQ(1)-KTNVAANR(1)	6	1.39e-08
399	C42D8.2a(157)-C42D8.2a(561),K09F5.2(157)-K09F5.2(563)	NEIEKIESSYDKEEQSEENTSFFTNEK(5)-KIQKVLLPIYK(4), NEIEKIESSYDKEEQSEENTSFFTNEK(5)-IQKVLLPIYK(3)	6	3.94e-08
400	Y71H2AM.23(473)-Y71H2AM.23(476)	LGFNPYGDMVEKR(12)-LKPDFSNSPK(2)	6	6.77e-08
401	Y37D8A.22(39)-Y37D8A.22(32)	GMKPSPSQNTLNR(3)-LKPAGR(2)	6	8.8e-08
402	C42D8.2a(897)-C42D8.2a(953),K09F5.2(899)-K09F5.2(955)	MFTPLFEQGVKSVQSVR(11)-FPGFSKFEYIEAEER(6)	6	1.32e-07
403	F28C6.7a(107)-F28C6.7a(41)	VAITKLK(5)-TKHGIR(2)	6	4.02e-07
404	F28B3.10(103)-F28B3.10(111)	DMSTISLFDKVYR(10)-FNKDALR(3)	6	4.85e-07
405	Y71F9B.3(159)-Y71F9B.3(146)	HSGSIDAKIGNFADR(8)-FVKPVAAR(3)	6	6.32e-07
406	C08F11.8(437)-C08F11.8(412)	KVLENEK(1)-NANMLKR(6)	6	1.1e-06
407	T27E9.1a(67)-T27E9.1a(53)	VPKEQGVAALWR(3)-AIAVDKR(6)	6	1.32e-06
408	C42D8.2a(753)-C42D8.2a(542)	ELAQKMNIR(5)-KEAIDALR(1)	6	1.96e-06
409	F46C5.8(176)-F46C5.8(182)	YIPFTVGKPR(8)-MAGKEDTGK(4)	6	2.47e-06
410	F31C3.1(114)-F31C3.1(26)	FADENFKLK(7)-GPKVTDK(3)	6	2.88e-06
411	F59D8.1(1550)-F59D8.1(1490)	GLESEKTSNEK(6)-NKWNR(2)	6	3.13e-06
412	C04F6.1(1201)-C04F6.1(1566),F59D8.1(1201)-F59D8.1(1566),F59D8.2(1201)-F59D8.2(1566)	GIPEYELLIKAAR(10)-HSKNAR(3)	6	3.96e-06
413	F32B5.1(326)-F32B5.1(319),W10C8.5(298)-W10C8.5(291)	GIEKQVPFSR(4)-LIKGVR(3)	6	1.11e-05
414	C04F6.1(1526)-C04F6.1(572),F59D8.1(1526)-F59D8.1(572),F59D8.2(1526)-F59D8.2(572)	TLIKEFSNR(4)-QNKPELR(3)	6	1.4e-05
415	C03G5.1(109)-C03G5.1(642),C34B2.7(102)-C34B2.7(636)	WHFYDTVKGSDWLGDQDAIHYMTR(8)-SETDWVPPKVR(9)	6	1.45e-05
416	C42D8.2a(208)-C42D8.2a(1584)	SINFDKCTER(6)-LLKESR(3)	6	1.99e-05
417	C04F6.1(1031)-C04F6.1(750),F59D8.1(1031)-F59D8.1(750),F59D8.2(1031)-F59D8.2(750)	VTIGNLEKTDLSEIKFDK(8)-KMNIRPR(1), VTIGNLEKTDLSEIK(8)-KMNIRPR(1)	6	3.88e-05
418	C37H5.8(593)-C37H5.8(599)	TKIADTK(2)-KILDNK(1)	6	5.82e-05
419	F54D8.3a(348)-F54D8.3a(365)	AVIGDPFDLKTTQGPQVDGK(10)-QVETILKYIAAGK(7)	6	7.48e-05
420	K09F5.2(1426)-K09F5.2(1587)	FDGYTIKTQLPSYSR(7)-LVKEAR(3)	6	0.000252
421	C04F6.1(1372)-C04F6.1(1377),F59D8.1(1372)-F59D8.1(1377),F59D8.2(1372)-F59D8.2(1377)	REEEIVVKK(8)-SDDKFLVK(4)	6	0.000838
422	F53A2.7(24)-F53A2.7(211)	LKGLSATDLGVVASQAALK(2)-KGEESFEIDEHPR(1)	5	4.25e-17
423	C42D8.2a(442)-C42D8.2a(450)	TIQETPFPSQSIAEALIKFAESR(18)-VAKNNLVVR(3)	5	2.28e-15
424	C14B1.1(328)-C14B1.1(352)	IVSLADQVEKFKPQEGEDFEAFTNSYLEGK(12)-SAQDLKAQDLPEDWNALPVK(6)	5	3.7e-15
425	F32A11.1(170)-F32A11.1(146)	DVEGAPDAVDADVTVKR(16)-LTNKPVTFTVIK(4)	5	7.29e-14
426	C04F6.1(727)-C04F6.1(861),F59D8.1(727)-F59D8.1(861),F59D8.2(727)-F59D8.2(861)	LSLYGKQSDELR(6)-VSIELEKLGAR(7)	5	3.06e-11
427	C15H9.6(641)-C15H9.6(590)	LYKDAGAGGEEAPEEGSDDKDEL(3)-LGGKLDEDDKK(4)	5	3.34e-11
428	Y66D12A.22(32)-Y66D12A.22(57)	MTNSCQAKCIATAFR(8)-CVAKYLDVHEK(4)	5	6.62e-11
429	H13N06.6a(95)-H13N06.6a(86),H13N06.6b(167)-H13N06.6b(158)	DFKITSDLQQDFQLLR(3)-EIKDAYTNR(3)	5	3.97e-10
430	K07H8.6a(1434)-K07H8.6a(1326)	VNGEEIEYQPESEIEKK(16)-YEQKPVMEK(4)	5	6.05e-10
431	C04F6.1(815)-C04F6.1(930),F59D8.1(815)-F59D8.1(930),F59D8.2(815)-F59D8.2(930)	SLLTFLTNDSKFELHR(11)-FVVPENKK(7)	5	2.05e-09
432	F01G4.6a(187)-F01G4.6a(77)	GCAPMIYKAEGLTGFYK(8)-IQVNPEKYTGIATGFR(7)	5	2.76e-09
433	R06F6.9(56)-R06F6.9(78)	LQLYGLFKQATAGDVQGK(8)-AKYDAWNTLK(2)	5	5.55e-09
434	F10G7.2(367)-F10G7.2(434)	DDGSEVKLHLSSIR(7)-SENFPEKTCATIK(7)	5	1.03e-08
435	F44E5.1(16)-F44E5.1(53)	GIWQSIVQTKR(10)-KAEIAR(1)	5	3.47e-08
436	C42D8.2a(1203)-C42D8.2a(637)	QFNGMPEYELLIKAAR(13)-VAIVCSKVLSFTR(7)	5	1.11e-07
437	F59D8.2(1478)-F59D8.2(1566)	NEECEVEKDR(8)-HSKNAR(3)	5	2.31e-07
438	C04F6.1(1470)-C04F6.1(1350),F59D8.1(1470)-F59D8.1(1350)	SYLLKNEECEVENDR(5)-KINKNSEELLVK(1)	5	2.48e-07
439	F27C1.7a(78)-F27C1.7a(92),F27C1.7b(99)-F27C1.7b(113)	FQEFVLDPTLKANK(11)-TAIEAISTKLGLTK(9)	5	4.27e-07
440	C42D8.2a(777)-C42D8.2a(474)	YKDMDYAFLPIDR(2)-GIVDYKNIRPLVR(6)	5	3.48e-06
441	K07H8.6a(1101)-K07H8.6a(1167)	KFEWLQNEK(1)-TVEELKEQK(6)	5	4.18e-06
442	Y22D7AL.10(43)-Y22D7AL.10(33)	GGIMLPEKSQGK(8)-VAAETKTK(6)	5	5.99e-06
443	ZK20.4a(212)-ZK20.4a(232)	MFKLGDGVPK(3)-AKEIMETLR(2)	5	7.55e-06
444	C42D8.2a(1203)-C42D8.2a(1584)	QFNGMPEYELLIKAAR(13)-LLKESR(3)	5	9.34e-06
445	T27E9.1a(27)-T27E9.1a(5)	FLIDLASGGTAAAVSKTAVAPIER(16)-EKSFDTK(2)	5	3.09e-05
446	C29E4.8(175)-C29E4.8(168)	VPMKDDLTGEPLIR(4)-SYHLEFKPPK(7)	5	3.65e-05
447	K04D7.3a(357)-K04D7.3a(215)	VKEAYR(2)-SKPIHK(2)	5	8.11e-05
448	C42D8.2a(637)-C42D8.2a(552),K09F5.2(639)-K09F5.2(554)	VAIVCSKVLSFTR(7)-LLKDTMPR(3)	5	9.94e-05
449	C04F6.1(1497)-C04F6.1(1566),F59D8.2(1497)-F59D8.2(1566)	KSDYESSSDYESNYDEK(1)-HSKNAR(3)	5	0.000108
450	T27E9.1a(37)-T27E9.1a(249)	VKLLLQVQDASK(2)-KDILYK(1)	5	0.000144
451	T22B11.5a(1002)-T22B11.5a(1028)	LPSSSPATGNKFTHMQEQK(11)-SKLEGFKA(7)	5	0.000165
452	C04F6.1(1386)-C04F6.1(1490),F59D8.1(1386)-F59D8.1(1490),F59D8.2(1386)-F59D8.2(1490)	KVNPTELEQYNIEILGDNLIVIR(1)-NKWNR(2)	5	0.000172
453	T27E9.1a(169)-T27E9.1a(249)	IVKSDGPIGLYR(3)-KDILYK(1)	5	0.000182
454	C04F6.1(223)-C04F6.1(1566),F59D8.1(223)-F59D8.1(1566),F59D8.2(223)-F59D8.2(1566)	FGSECKECEK(6)-HSKNAR(3)	5	0.000296
455	H28O16.1d(2)-H28O16.1d(90)	AGASGSEVSK(1)-EGDIVKR(6)	5	0.000357
456	T27E9.1a(27)-T27E9.1a(151)	FLIDLASGGTAAAVSKTAVAPIER(16)-LAADIGKANDR(7)	5	0.000513
457	R04F11.2(77)-R04F11.2(77)	WLAKDEMR(4)-WLAKDEMR(4)	5	0.00107
458	VC5.3a(1325)-VC5.3a(1320)	KSEVMK(1)-LKSEGK(2)	5	0.00115
459	C42D8.2a(230)-C42D8.2a(777)	YSSECPECEKDTELIRPQTVYTYVLENEELK(10)-YKDMDYAFLPIDR(2)	4	5.26e-15
460	W02F12.5(335)-W02F12.5(220)	HFVDISVAVATPKGLVVPVLR(13)-VVVPKGVDPSHAITGAR(5)	4	6.92e-14
461	F09F7.4a(385)-F09F7.4a(323),F09F7.4b(362)-F09F7.4b(300)	DSVVDNYFSPLPNNSDLKL(18)-MSYAKIFTMEYR(5)	4	1.61e-10
462	C42D8.2a(753)-C42D8.2a(917)	ELAQKMNIR(5)-IQAVAGMKR(8)	4	8.74e-10
463	C32F10.8a(58)-C32F10.8a(143)	AVELEKELATGAQKPFPNVIK(6)-KHVAEYIK(1)	4	5.02e-09
464	T08B2.7a(96)-T08B2.7a(63),T08B2.7b(70)-T08B2.7b(37)	ATLDKLQSDESIK(5)-VEKQGDVAVVK(3)	4	2.05e-08
465	F31E3.5(450)-F31E3.5(457),R03G5.1a(450)-R03G5.1a(457)	SDGSSGKVTK(7)-SAQKAAPK(4)	4	3.43e-08
466	C42D8.2a(1033)-C42D8.2a(745)	LTVGQLEKTELSQIK(8)-IQTGIKLLK(6)	4	1.12e-07
467	Y39B6A.34a(28)-Y39B6A.34a(31)	FDWVGPPDNLSKIR(12)-KIMLR(1)	4	2.59e-07
468	C42D8.2a(326)-C42D8.2a(332),K09F5.2(326)-K09F5.2(332)	AEFAPFEKFPLDK(8)-KMHLIK(1)	4	2.8e-07
469	Y22D7AL.5a(209)-Y22D7AL.5a(227)	TLNDELELIEGMKFDR(13)-GAKVEYEK(3)	4	4.52e-07
470	F56D12.1a(142)-F56D12.1a(138)	MKLNASTMLGQGK(2)-AADLAAGKYR(8)	4	6.59e-07
471	K09F5.2(1529)-K09F5.2(1493)	KSDLVEK(1)-KYDER(1)	4	7.24e-07
472	C04F6.1(1470)-C04F6.1(1349),F59D8.1(1470)-F59D8.1(1349)	SYLLKNEECEVENDR(5)-FAVLAKK(6)	4	1.25e-06
473	F31C3.1(40)-F31C3.1(166)	VYFDMEIGGKPIGR(10)-KIEQTEK(1)	4	2.06e-06
474	LLC1.3a(395)-LLC1.3a(430)	AEEQLKQEGVAYK(6)-VLADKQTDR(5)	4	2.17e-06
475	C42D8.2a(1605)-C42D8.2a(1033)	QQPLQLDDYPVSFVESVKVPTACVAY(18)-LTVGQLEKTELSQIK(8)	4	2.83e-06
476	C42D8.2a(318)-C42D8.2a(953),K09F5.2(318)-K09F5.2(955)	NGDKAEFAPFEKFPLDK(4)-FPGFSKFEYIEAEER(6)	4	3.38e-06
477	C04F6.1(1361)-C04F6.1(572),F59D8.1(1361)-F59D8.1(572),F59D8.2(1361)-F59D8.2(572)	NSEELLVKVVR(8)-QNKPELR(3)	4	3.69e-06
478	R13A5.8(63)-R13A5.8(57)	KELAAIR(1)-KWFGVR(1)	4	4.42e-06
479	F54H12.1a(131)-F54H12.1a(141)	TAVPSTIHCDHLIEAQKGGAQDLAR(17)-AKDLNK(2)	4	5.27e-06
480	C05C8.3(40)-C05C8.3(34)	IGDSKCK(5)-IEIIKK(5)	4	1.06e-05
481	LLC1.3a(415)-LLC1.3a(118)	AKTNNDQEGFVK(2)-SNSVKQLTGGIK(5)	4	1.57e-05
482	Y22D7AL.5a(87)-Y22D7AL.5a(73)	DKYQNLGAKLIQDVANK(9)-DGVTVAKSIDLK(7), YQNLGAKLIQDVANK(7)-DGVTVAKSIDLK(7)	4	1.76e-05
483	T20G5.2(78)-T20G5.2(461)	SMKGMVTETSVLDPEEGIR(3)-SHSTDGLIKLALAAK(9)	4	1.78e-05
484	F27D9.5(488)-F27D9.5(205)	TGDITTKYLPEVYPEGFQGTSLSPK(7)-DIGYPVMIKASAGGGGK(9)	4	1.92e-05
485	F56B3.5(100)-F56B3.5(53)	KTMSQQEATR(1)-KNSLGR(1)	4	2e-05
486	D1007.12(149)-D1007.12(143)	NVKTAAPR(3)-TQQKTAK(4)	4	2.02e-05
487	K09F5.2(1539)-K09F5.2(1493)	TQIKEFSHR(4)-KYDER(1)	4	2.08e-05
488	F10G7.2(383)-F10G7.2(498)	ESGDDKATGGPGR(6)-KDTHR(1)	4	3.54e-05
489	ZK829.4(74)-ZK829.4(77)	LAEELKSNSLSQKDK(13)-KNLVSGILGAIKPVNK(1)	4	7.02e-05
490	C25A1.5(34)-C25A1.5(2)	HPGGAKVLNR(6)-GIGADEK(1)	4	7.47e-05
491	F27D4.1(217)-F27D4.1(227)	SERPDLATAKVVVSGGR(10)-GLKSGDNFK(3)	4	0.000127
492	F02A9.3(129)-F02A9.3(65)	ELHQQYLAGDKPTLDSLK(11)-ELAQNHKEYK(7)	4	0.00014
493	F35G2.4(234)-F35G2.4(243)	LAKIAPNHPR(3)-AKGNVK(2)	4	0.00015
494	C53A5.1(119)-C53A5.1(124)	LADKEYFK(4)-KYNPLK(1)	4	0.000184
495	K07H8.6a(1101)-K07H8.6a(1072)	KFEWLQNEK(1)-NYEKVYK(4)	4	0.000356
496	C04F6.1(727)-C04F6.1(750),F59D8.1(727)-F59D8.1(750),F59D8.2(727)-F59D8.2(750)	LSLYGKQSDELR(6)-KMNIRPR(1)	4	0.000899
497	T05H4.13a(23)-T05H4.13a(26),T05H4.13b(23)-T05H4.13b(26),T05H4.13c(23)-T05H4.13c(26)	TGETKPVKFR(8)-KQQLLK(1)	3	3.78e-13
498	K07H8.6a(1170)-K07H8.6a(1100)	TVEELKEQKYR(9)-EQITKK(5)	3	3.72e-11
499	F58G1.4(191)-F58G1.4(170)	TLAGVQLGNGKTWLNIYSEEGK(11)-EPIDIGALPIPQLGGDWKVGAR(18)	3	5.79e-11
500	C08F11.8(443)-C08F11.8(412)	VLENEKYR(6)-NANMLKR(6)	3	6.98e-11
501	C04F6.1(1215)-C04F6.1(1201)	LNQVNVVSEYKLTPQSEYTFSR(11)-GIPEYELLIKAAR(10)	3	1.02e-10
502	C42D8.2a(1299)-C42D8.2a(542)	SVKHQLTEASGSVCK(3)-KEAIDALR(1)	3	6.36e-10
503	T27E9.1a(47)-T27E9.1a(56)	LLLQVQDASKAIAVDKR(10)-YKGIMDVLIR(2)	3	1.19e-09
504	F59D8.1(1121)-F59D8.1(1158)	SPMEHENKEWTLR(8)-EVQLALNAKWGSSK(9)	3	2.3e-09
505	Y67D2.3(46)-Y67D2.3(51)	GQPAGTKSNR(7)-VKLEAGK(2)	3	2.63e-09
506	Y38A10A.5(30)-Y38A10A.5(36)	EEFNDASWEKR(10)-WVQSKHK(5)	3	1.36e-08
507	T27E9.1a(151)-T27E9.1a(53)	LAADIGKANDR(7)-AIAVDKR(6)	3	1.48e-08
508	C44E4.3(42)-C44E4.3(49)	NVPLAPADPILGVTEAFKK(18)-DTNPNKINLGVGAYR(6)	3	3.57e-08
509	T05E11.3a(406)-T05E11.3a(382)	VFITDDFADMLPKYLSFIR(13)-KSPNDMFQNYGKVIENIK(12)	3	3.81e-08
510	C14B1.1(254)-C14B1.1(108)	LSAVTEFTHESAQEIVGGDLKK(21)-SGKPTKYTGGR(3)	3	4.66e-08
511	C50F2.6a(33)-C50F2.6a(103),C50F2.6b(69)-C50F2.6b(139)	DEDGLEIKIIRPIK(8)-KVVIPGNLGFGDK(1)	3	6e-08
512	F35G12.2(322)-F35G12.2(361)	NTGTTLAGKDLANPTAFIR(9)-TLVDKR(5)	3	1.42e-07
513	F59D8.1(1215)-F59D8.1(1201),F59D8.2(1215)-F59D8.2(1201)	LNQVNVVSEYKLTPESEYTFSR(11)-GIPEYELLIKAAR(10)	3	1.55e-07
514	K07H8.6a(165)-K07H8.6a(203)	EKYEGAEK(2)-KEDEQR(1), KEKYEGAEK(3)-KEDEQR(1)	3	2.56e-07
515	D1007.6(125)-D1007.6(115)	TEKVTEAGPGGAPVYR(3)-AAQGEKGDR(6)	3	1.56e-06
516	K07H8.6a(1348)-K07H8.6a(1532)	STKINTFDQVAYR(3)-IEKNQEEEK(3)	3	2.54e-06
517	Y38F2AR.2(103)-Y38F2AR.2(110)	EISGQYAADKK(10)-EKEER(2)	3	3.81e-06
518	R07H5.2a(97)-R07H5.2a(49)	LQEALLEYDKAHR(10)-RLPIPKLPDTVNR(6)	3	6.3e-06
519	C04F6.1(1336)-C04F6.1(1566),F59D8.1(1336)-F59D8.1(1566),F59D8.2(1336)-F59D8.2(1566)	APLTTCYSLVAKDCSEQPR(12)-HSKNAR(3)	3	1.03e-05
520	F30F8.9a(212)-F30F8.9a(219)	LDSSEMLLVHNMQSMYPIPGSSKR(23)-MKALR(2)	3	1.81e-05
521	C04F6.1(1361)-C04F6.1(1573),F59D8.1(1361)-F59D8.1(1573),F59D8.2(1361)-F59D8.2(1573)	NSEELLVKVVR(8)-FLKEAR(3)	3	2.09e-05
522	C08F11.8(282)-C08F11.8(286)	IIPIGGISVKTQK(10)-KSLELPEK(1)	3	4.89e-05
523	C01F1.2(299)-C01F1.2(129)	VLKYQAQNR(3)-KQTAGK(1)	3	9.3e-05
524	C42D8.2a(1314)-C42D8.2a(1584)	VQKNQIR(3)-LLKESR(3)	3	9.43e-05
525	C42D8.2a(1424)-C42D8.2a(753)	FDGYTIKTQLPSYSR(7)-ELAQKMNIR(5)	3	9.51e-05
526	C04F6.1(1372)-C04F6.1(572),F59D8.1(1372)-F59D8.1(572),F59D8.2(1372)-F59D8.2(572)	REEEIVVKK(8)-QNKPELR(3)	3	0.000102
527	C42D8.2a(326)-C42D8.2a(833)	AEFAPFEKFPLDKK(8)-KFPTTLGLPLTISGK(1), AEFAPFEKFPLDK(8)-KFPTTLGLPLTISGK(1)	3	0.00011
528	ZK892.2(112)-ZK892.2(25)	TILDPKMLK(6)-KVGTSFR(1)	3	0.000123
529	C42D8.2a(1311)-C42D8.2a(1584)	HQLTEASGSVCKVQK(12)-LLKESR(3)	3	0.000128
530	C04F6.1(572)-C04F6.1(1566),F59D8.1(572)-F59D8.1(1566),F59D8.2(572)-F59D8.2(1566)	QNKPELR(3)-HSKNAR(3)	3	0.000134
531	F28C6.7a(133)-F28C6.7a(41)	VTGILKGK(6)-TKHGIR(2)	3	0.000142
532	E04A4.7(91)-E04A4.7(78),ZC116.2(101)-ZC116.2(88)	MVFAGLKK(7)-KYIPGTK(1)	3	0.000144
533	C42D8.2a(777)-C42D8.2a(753)	YKDMDYAFLPIDR(2)-ELAQKMNIR(5)	3	0.00015
534	F59D8.1(1555)-F59D8.1(1566)	TSNEKIR(5)-HSKNAR(3)	3	0.000161
535	C04F6.1(572)-C04F6.1(1573),F59D8.1(572)-F59D8.1(1573),F59D8.2(572)-F59D8.2(1573)	QNKPELR(3)-FLKEAR(3)	3	0.000339
536	M153.1(268)-M153.1(268)	ATGDKALPR(5)-ATGDKALPR(5)	3	0.000346
537	C42D8.2a(230)-C42D8.2a(208)	YSSECPECEKDTELIRPQTVYTYVLENEELK(10)-SINFDKCTER(6)	3	0.000354
538	C15H9.6(345)-C15H9.6(292),F43E2.8(342)-F43E2.8(289)	ATLKPVQK(4)-AVQKLR(4)	3	0.000365
539	F55C5.5(64)-F55C5.5(77)	WLKEAAAK(3)-AAKLGTR(3)	3	0.000375
540	K09F5.2(1049)-K09F5.2(1070)	IFEKEFELEQENTESR(4)-MVKSIQK(3)	3	0.000381
541	H28O16.1a(412)-H28O16.1a(409), H28O16.1d(385)-H28O16.1d(382)	AMKQVAGSMKLELAQYR(3)-VGSAAQTKAMK(8)	3	0.000426
542	D2030.5(46)-D2030.5(53)	LNHVAIATPDLKK(12)-SSEFYKGLGAK(6)	3	0.000559
543	F59D8.1(1497)-F59D8.1(1490)	KSDYVSSSDYENNYDEK(1)-NKWNR(2)	3	0.000751
544	T20G5.2(384)-T20G5.2(354)	LVSTLYKITPGILLEQGK(7)-KTDPR(1)	3	0.00098
545	C23H3.4a(35)-C23H3.4a(39),C23H3.4b(11)-C23H3.4b(15)	QQEKLSK(4)-KLTER(1)	3	0.00108
546	K07H8.6a(1101)-K07H8.6a(1068)	KFEWLQNEK(1)-MEKNYEK(3)	3	0.00191
547	C42D8.2a(972)-C42D8.2a(1281)	TVVVPQWQQKTQEIEK(10)-IELKNVQVPR(4)	3	0.00476
Filtering criteria: FDR < 5%, E-value < 0.01, spectral count ≥ 3. Identified cross-links are sorted and assigned as described in Figure 4—source data 1. *When an inter-linked peptide is attributed to more than five pairs of lysine residues at the protein level (as one or two peptides of the inter-link are assigned to multiple protiens), only one of them is given for clarity.
