# Supplementary material for: Trifunctional cross-linker for mapping protein-protein interaction networks and comparing protein conformational states
Source: eLife journal article supplement (doi:10.7554/elife.12509), 2016-03-03
Supplement: supp [file elife-12509-supp-v1.zip › elife_poa_e12509_Figure_7_figure_supplement_1.pdf]

**A**

KGTNETTK  
|  
Leiker

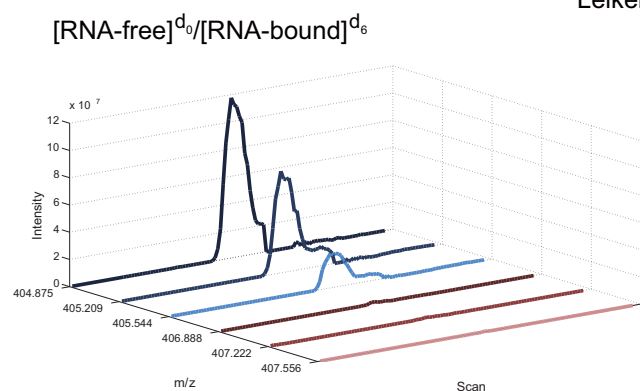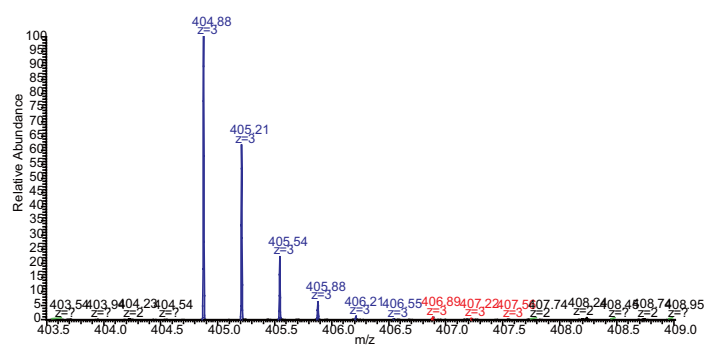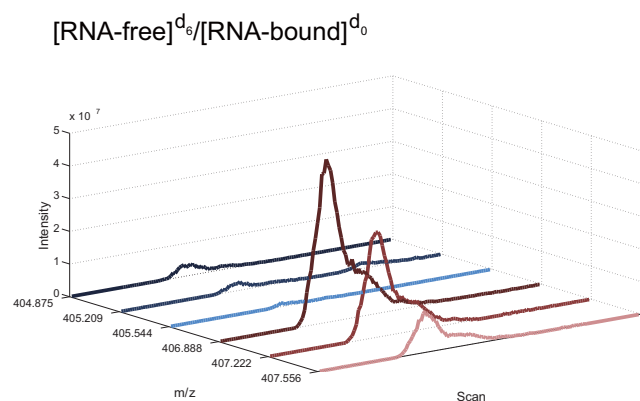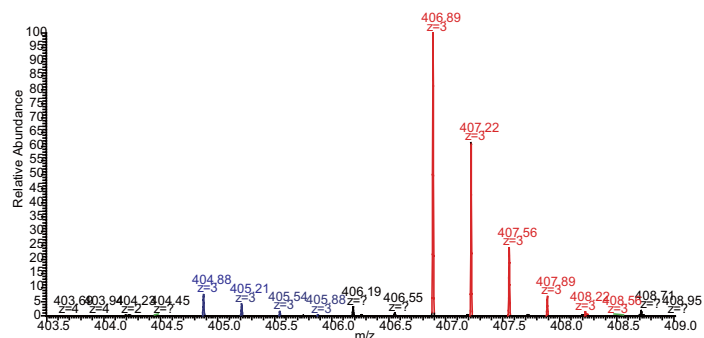**B**

EIPYIYVPSKK  
|  
Leiker

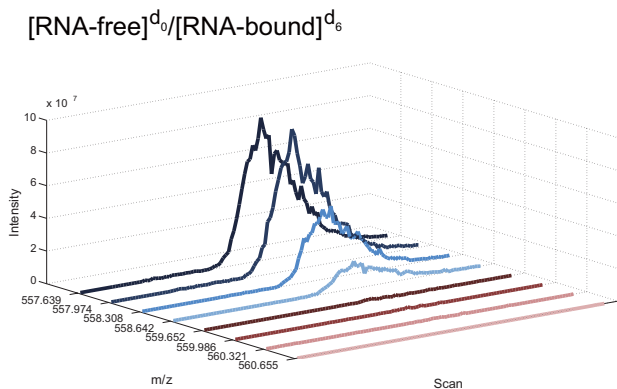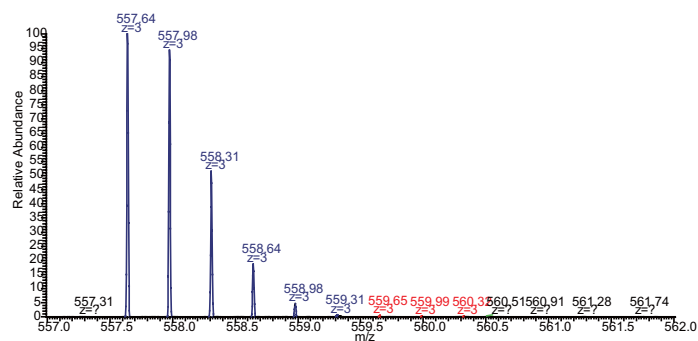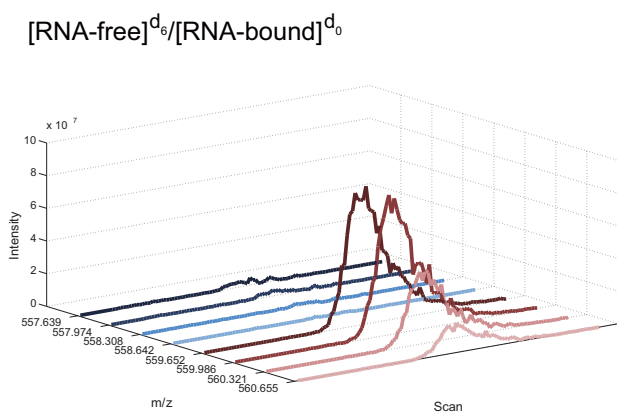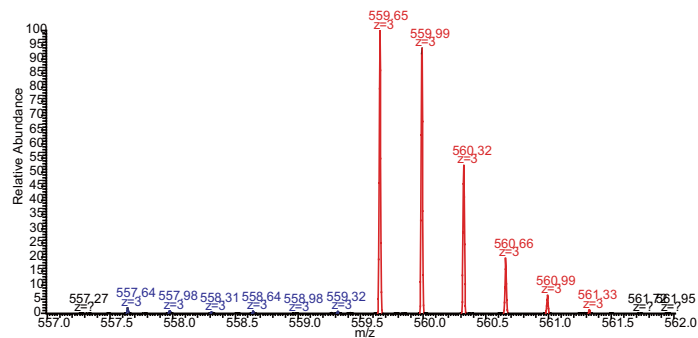

**Figure 7—figure supplement 1. Extracted ion chromatograms (left) and representative MS1 spectra (right) of a mono-linked peptide corresponding to (A) K35 and (B) K84.**
