# Supplementary material for: Trifunctional cross-linker for mapping protein-protein interaction networks and comparing protein conformational states
Source: eLife journal article supplement (doi:10.7554/elife.12509), 2016-03-03
Supplement: supp [file elife-12509-supp-v1.zip › elife_poa_e12509_Figure_7_source_data_1.xlsx]

## Sheet: Sheet1
Figure 7—source data 1. Quantitative CXMS analysis of L7Ae with or without the H/ACA RNA
Protein (mono-linked site)	Ratio (F/B) from the forward labeling experiment					Ratio (F/B) from the reverse labeling experiment
	rep1	rep2	rep3	median	log2 median	rep1	rep2	rep3	median	log2 median
K42	7.88463	L	48.0008	27.9427	4.8044	49.88	H	H	49.88	5.64039
K84	102.501	8.66664	13.7142	13.7142	3.7776	29.07	6.41936	16.2	16.2	4.01792
K35	102.501	9.45457	16	16	4	10.4	3.32258	5.41905	5.41905	2.43804
K32	34.167	3.05882	4.57143	4.57143	2.19265	7.17	3.2043	4.07619	4.07619	2.02722
K50	6.83336	1.22353	-	4.02844	2.01022	2.97	n.a.	-	2.97	1.57046
K74	2.0098	0.845529	-	1.42767	0.513659	4.49	2.5914	-	3.5407	1.82403
K85	10.25	1.44444	2.4	2.4	1.26303	2.97	1.34409	2.19048	2.19048	1.13124
K107	5.125	0.936937	1.6	1.6	0.678072	1.62	1.05376	2.08571	1.62	0.695994
K120	4.27084	1.06122	1.3913	1.3913	0.476438	1.76	1.06452	1.41905	1.41905	0.504923
K19	4.27084	0.904348	1.57377	1.57377	0.654224	1.05	0.763441	1.43809	1.05	0.070389
K9	4.27084	0.666667	0.864865	0.864865	-0.209453	1.81	1.51613	1.70476	1.70476	0.76957
K4	2.09184	1.04	0.413793	1.04	0.056584	1.26	2.25807	0.952381	1.26	0.333424
K124	4.10001	0.562162	0.75	0.75	-0.415037	1.43	1.47312	1.75238	1.47312	0.558873
K118	3.79629	0.52	0.827586	0.827586	-0.273018	1.17	1.32258	2.21905	1.32258	0.403356
K2	3.20313	0.737589	1.01053	1.01053	0.015107	1.35	1.10753	1.07619	1.10753	0.147342
K14	3.79629	0.440678	0.806723	0.806723	-0.309855	0.91	1.07527	1.75238	1.07527	0.104698
- : the site was not identfied.
L: only the [d0]-Leiker-labeled mono-link was observed; H: only the [d6]-Leiker-labeled mono-link was observed.
n.a.: the site cannot be quantified.
