# Supplementary material for: Trifunctional cross-linker for mapping protein-protein interaction networks and comparing protein conformational states
Source: eLife journal article supplement (doi:10.7554/elife.12509), 2016-03-03
Supplement: supp [file elife-12509-supp-v1.zip › elife_poa_e12509_Figure_8_source_data_1.xlsx]

## Sheet: Sheet1
Figure 8—source data 1. Quantitative CXMS analysis of E. coli lysates
Cross-links	Forward labeling experiment		Reverse labeling experiment
	ratio [log phase]/ [stationary phase]	log2 ratio	ratio [log phase]/ [stationary phase]	log2 ratio
Inter-molecular Cross-links
YQJD(63)-ELAB(66)	0.076715	-3.70435	0.117647	-3.08746
DGAL(81)-ALAC(2)	0.242165	-2.04594	0.342246	-1.54689
GLTD(2)-GLTB(693)	2.23684	1.16146	3.21925	1.68673
HISJ(234)-YTFR(322)	1.39344	0.478654	3.34759	1.74313
RS7(11)-RS9(100)	1.28788	0.364996	3.08021	1.62303
CH60(117)-YEHI(884)	0.541401	-0.88523	0.684492	-0.546894
DNAK(55)-ESSD(61)	0.643939	-0.635003	0.727273	-0.459431
ATPA(384)-CH60(226)	1.7	0.765535	1.22995	0.298596
RL19(87)-CBRA(125)	1.41667	0.502501	1.3262	0.407302
SUCC(146)-SUCD(256)	1.19718	0.259644	1.22995	0.298596
RL28(26)-ARCA(188)	0.944444	-0.082463	0.951872	-0.071161
RISA(173)-ATPB(396),RISA(173)-INSQ(214),RISA(173)-YDCR(331)	1.16438	0.219566	0.951872	-0.071161
IPYR(116)-AMY1(341)	0.894737	-0.160465	1.15508	0.207993
RS6(93)-RS18(50)	0.867347	-0.205319	1.5508	0.633015
MDH(99)-YDHV(583)	1.13333	0.180572	0.57754	-0.792007
EFTU1(264)-TORC(387),EFTU1(264)-RDGC(70),EFTU1(264)-FLXA(93),EFTU2(264)-TORC(387),EFTU2(264)-RDGC(70),EFTU2(264)-FLXA(93)	0.70248	-0.509472	1.80749	0.853985
RL28(26)-ARGD(351)	3.4	1.76553	0.737968	-0.43837
RL28(10)-GLPT(11)	3.4	1.76553	0.106952	-3.22497
Intra-molecular Cross-links
ELAB(2)-ELAB(66)	0.137987	-2.8574	0.117647	-3.08746
ACP(10)-ACP(1)	0.147059	-2.76553	0.149733	-2.73954
YAHO(80)-YAHO(55)	0.156538	-2.67542	0.149733	-2.73954
ALF1(239)-ALF1(208)	0.187638	-2.41398	0.128342	-2.96193
TALA(40)-TALA(307)	0.143581	-2.80006	0.224599	-2.15458
PFLB(195)-PFLB(2)	0.271565	-1.88063	0.342246	-1.54689
PFLB(162)-PFLB(616)	0.271565	-1.88063	0.363636	-1.45943
PFLB(195)-PFLB(235)	0.195853	-2.35216	0.481283	-1.05504
GPMA(113)-GPMA(248)	0.11708	-3.09443	0.588235	-0.765535
GPMA(113)-GPMA(250)	0.175258	-2.51245	0.545455	-0.874468
OTC1(87)-OTC1(54),OTC2(87)-OTC2(54)	2.93104	1.55141	2.50267	1.32347
OSMY(143)-OSMY(125)	0.352697	-1.5035	0.438503	-1.18934
GPMA(33)-GPMA(18)	0.287162	-1.80006	0.502674	-0.992305
RS4(83)-RS4(185)	1.77083	0.824428	3.82888	1.93692
GLNH(147)-GLNH(153)	1.88889	0.917537	3.30481	1.72457
PUR1(350)-PUR1(345)	2.5	1.32193	2.27807	1.18782
OPPA(284)-OPPA(281)	2.83333	1.5025	2.0107	1.00769
GPMA(100)-GPMA(113)	0.263158	-1.926	0.59893	-0.739541
GRCA(26)-GRCA(1)	2.07317	1.05184	2.4492	1.29231
GPMA(248)-GPMA(39)	0.108974	-3.19794	0.770053	-0.37697
PYRB(30)-PYRB(2)	2.02381	1.01707	2.23529	1.16047
LIVJ(292)-LIVJ(289)	3.26924	1.70895	1.58289	0.662559
RS16(46)-RS16(76)	1.49123	0.576501	3.20856	1.68192
CARB(412)-CARB(504)	2.42857	1.28011	1.68984	0.756887
LIVJ(153)-LIVJ(187)	1.7	0.765535	2.37433	1.24752
ACP(10)-ACP(2)	2.17949	1.12399	1.72192	0.784022
IHFA(66)-IHFA(57)	0.594406	-0.75048	0.459893	-1.12063
IHFB(27)-IHFB(1)	0.467033	-1.0984	0.588235	-0.765535
PFLB(17)-PFLB(2)	0.389908	-1.35879	0.663102	-0.592697
CARB(649)-CARB(366)	2.17949	1.12399	1.59358	0.672274
PUR9(47)-PUR9(17)	1.41667	0.502501	2.79144	1.48101
GLYA(331)-GLYA(62)	0.300353	-1.73527	0.759358	-0.397148
ILVC(184)-ILVC(145)	1.66667	0.736966	1.85027	0.887733
DNAK(304)-DNAK(299)	0.482955	-1.05004	0.652406	-0.616158
RL28(26)-RL28(10)	2.17949	1.12399	1.48663	0.572047
DNAK(304)-DNAK(246)	0.551948	-0.857396	0.59893	-0.739541
OSMY(64)-OSMY(81)	0.416667	-1.26303	0.716578	-0.480804
CYSP(71)-CYSP(153)	1.16438	0.219566	6.71658	2.74773
MASY(2)-MASY(46)	0.494186	-1.01687	0.663102	-0.592697
PUR1(488)-PUR1(345)	2.07317	1.05184	1.47594	0.56163
PTA(665)-PTA(639)	0.467033	-1.0984	0.695187	-0.524527
IF2(194)-IF2(186)	1.80851	0.854803	1.58289	0.662559
RL28(10)-RL28(26)	1.97675	0.983127	1.37968	0.464333
CARB(412)-CARB(366)	1.51786	0.602035	1.68984	0.756887
RS20(16)-RS20(19)	1.63461	0.708951	1.52941	0.612977
FKBA(127)-FKBA(134)	2.74193	1.45519	1.22995	0.298596
RS9(2)-RS9(100)	1.60377	0.681471	1.5508	0.633015
SUCC(372)-SUCC(359)	1.41667	0.502501	1.79679	0.845423
CH60(80)-CH60(42)	0.447368	-1.16047	0.780749	-0.357069
IF2(141)-IF2(141),IF2(141)-IF2(149),IF2(149)-IF2(141),IF2(149)-IF2(149)	1.7	0.765535	1.39037	0.475473
PURA(367)-PURA(125)	0.447368	-1.16047	0.812834	-0.298967
RL19(87)-RL19(63)	1.41667	0.502501	1.59358	0.672274
DHAS(232)-DHAS(244)	0.293103	-1.77052	0.877005	-0.189343
IDH(265)-IDH(273)	1.39344	0.478654	1.59358	0.672274
RL6(44)-RL6(6)	1.41667	0.502501	1.41176	0.4975
RDGB(13)-RDGB(177)	1.23188	0.300866	1.75401	0.810658
ILVC(81)-ILVC(75)	1.08974	0.123989	3.89305	1.9609
GPMA(100)-GPMA(250)	0.355648	-1.49148	0.898396	-0.154577
CH60(122)-CH60(117)	0.590278	-0.760534	0.812834	-0.298967
TPIS(103)-TPIS(111)	0.801887	-0.31853	0.620321	-0.688913
RS13(78)-RS13(103)	0.85	-0.234466	0.534759	-0.903039
RS5(126)-RS5(86)	1.26866	0.343302	1.52941	0.612977
IF2(186)-IF2(194)	3.14815	1.6545	1.09091	0.125531
RL2(59)-RL2(207)	1.30769	0.387023	1.43315	0.519195
AAT(134)-AAT(116)	0.537975	-0.89439	0.86631	-0.207045
RS12(108)-RS12(111)	1.77083	0.824428	1.16578	0.221289
PGM(529)-PGM(2)	0.809524	-0.304854	0.663102	-0.592697
GPMA(100)-GPMA(248)	0.355648	-1.49148	0.919786	-0.12063
GPMA(146)-GPMA(86)	0.894737	-0.160465	0.459893	-1.12063
CAPP(693)-CAPP(676)	1.11842	0.161463	2.03209	1.02296
CH60(42)-CH60(390)	0.772727	-0.371969	0.737968	-0.43837
CH60(117)-CH60(34)	0.894737	-0.160465	0.566845	-0.818974
CH60(51)-CH60(117)	0.611511	-0.70955	0.887701	-0.171854
RS9(2)-RS9(13)	1.39344	0.478654	1.18717	0.247522
CH60(390)-CH60(277)	0.913978	-0.129768	0.534759	-0.903039
APT(39)-APT(53)	1.37097	0.455194	1.16578	0.221289
SERA(39)-SERA(141)	0.551948	-0.857396	0.930481	-0.103951
RL1(167)-RL1(54)	1.1039	0.142605	1.51872	0.602853
RS5(86)-RS5(156)	1.03659	0.051839	1.74332	0.801834
RRF(15)-RRF(7)	1.08974	0.123989	1.21925	0.285995
ATPA(384)-ATPA(388)	1.7	0.765535	1.01604	0.022961
RPOB(191)-RPOB(203)	1.14865	0.199938	1.05882	0.082463
SODM(187)-SODM(119)	1.14865	0.199938	1.04813	0.067815
DNAK(55)-DNAK(263)	0.787037	-0.345496	0.973262	-0.0391
ARTI(77)-ARTI(96)	1.88889	0.917537	1.00535	0.007695
SYV(909)-SYV(926)	1.01191	0.017074	1.28342	0.359996
ODP1(724)-ODP1(866)	0.944444	-0.082463	0.951872	-0.071161
EFTS(95)-EFTS(125)	1.11842	0.161463	1.01604	0.022961
EFTU1(209)-EFTU1(10),EFTU2(209)-EFTU2(10)	1	0	1.29412	0.371969
RL1(200)-RL1(54)	1	0	1.51872	0.602853
GLNH(188)-GLNH(248)	1	0	2.47059	1.30485
RRF(15)-RRF(26)	1.01191	0.017074	0.727273	-0.459431
AROG(48)-AROG(41)	0.904256	-0.145197	1.04813	0.067815
EFG(497)-EFG(507)	0.876289	-0.190521	1.03743	0.053018
SODM(119)-SODM(68)	0.876289	-0.190521	1.04813	0.067815
RS4(83)-RS4(77)	0.965909	-0.050041	1.19786	0.260461
6PGD(260)-6PGD(454)	0.904256	-0.145197	1.09091	0.125531
PANC(39)-PANC(181)	0.52795	-0.921526	1.01604	0.022961
EFG(389)-EFG(440)	0.955056	-0.066343	1.27273	0.347923
G3P1(213)-G3P1(124)	0.449736	-1.15285	1.01604	0.022961
LON(761)-LON(741)	0.696721	-0.521346	1.03743	0.053018
EFTU1(57)-EFTU1(264),EFTU2(57)-EFTU2(264)	0.876289	-0.190521	1.1123	0.153545
PHOL(331)-PHOL(281)	1.04938	0.069541	0.727273	-0.459431
EFTU1(238)-EFTU1(295),EFTU2(238)-EFTU2(295)	1.08974	0.123989	0.834225	-0.261492
EFG(159)-EFG(425)	0.923913	-0.114171	1.21925	0.285995
EFTU1(10)-EFTU1(57),EFTU2(10)-EFTU2(57)	0.85	-0.234466	1.12299	0.167352
ODO1(589)-ODO1(576)	0.965909	-0.050041	1.86096	0.896049
FABI(205)-FABI(201)	0.885416	-0.175572	1.19786	0.260461
DHE4(44)-DHE4(1)	0.858586	-0.219966	1.19786	0.260461
DPPA(202)-DPPA(105)	0.955056	-0.066343	1.95722	0.968805
EFG(323)-EFG(440)	0.817308	-0.291048	1.16578	0.221289
ENO(195)-ENO(62)	0.578231	-0.790282	1.05882	0.082463
PGM(273)-PGM(2)	0.841584	-0.24882	1.20856	0.273284
FABI(43)-FABI(201)	0.85	-0.234466	1.25134	0.32347
MODA(250)-MODA(257)	1.14865	0.199938	0.759358	-0.397148
PANC(1)-PANC(86)	0.551948	-0.857396	1.06952	0.096962
RL1(205)-RL1(54)	0.904256	-0.145197	1.50802	0.592657
EFTU1(314)-EFTU1(57),EFTU2(314)-EFTU2(57)	0.801887	-0.31853	1.20856	0.273284
GLYA(62)-GLYA(250)	0.53125	-0.912537	1.08021	0.111317
RL1(141)-RL1(198)	0.923913	-0.114171	2.06417	1.04556
HNS(96)-HNS(136)	0.648855	-0.624032	1.14438	0.194572
MODA(202)-MODA(115)	0.664063	-0.590609	1.15508	0.207993
G3P1(124)-G3P1(192)	0.745614	-0.423499	1.22995	0.298596
PGK(30)-PGK(84)	0.809524	-0.304854	1.35829	0.44179
RS9(2)-RS9(22)	0.876289	-0.190521	1.80749	0.853985
GPMA(239)-GPMA(100)	0.188053	-2.41079	1.05882	0.082463
EFTU1(10)-EFTU1(264),EFTU2(10)-EFTU2(264)	0.817308	-0.291048	1.63636	0.710494
EFTS(207)-EFTS(214)	0.739131	-0.436099	1.42246	0.508388
DBHA(22)-DBHA(1)	0.801887	-0.31853	1.68984	0.756887
GLYA(346)-GLYA(331)	0.461956	-1.11417	1.16578	0.221289
ATPA(118)-ATPA(1)	0.809524	-0.304854	1.90374	0.928839
GLYA(293)-GLYA(375)	0.817308	-0.291048	2.03209	1.02296
MDH(99)-MDH(312)	0.559211	-0.838536	1.35829	0.44179
HNS(32)-HNS(57)	0.541401	-0.88523	1.49733	0.582388
DHE4(136)-DHE4(286)	0.541401	-0.88523	1.51872	0.602853
KAD(50)-KAD(40)	0.607143	-0.719892	1.70053	0.765989
ARGC(43)-ARGC(275)	0.611511	-0.70955	2.13904	1.09696
DHAS(232)-DHAS(104)	0.297203	-1.75048	1.36898	0.453106
EFTU1(264)-EFTU1(5),EFTU2(264)-EFTU2(5)	0.515152	-0.956931	2.34225	1.22789
GLYA(346)-GLYA(62)	0.537975	-0.89439	2.65241	1.4073
SYM(466)-SYM(403)	0.480226	-1.05821	2.82353	1.4975
HNS(83)-HNS(57)	0.098266	-3.34716	1.66845	0.738508
RL7/12(85)-RL7/12(71)	0.310219	-1.68864	3.35829	1.74773
Mono-links
LEUC(181)	12.1428	3.60203	30.6845	4.93944
YEAG(102)	0.019024	-5.71602	0.117647	-3.08746
YQJD(63)	0.081496	-3.61713	0.160428	-2.64
USPF(96)	0.146552	-2.77052	0.096257	-3.37697
YEGP(41)	0.16537	-2.59623	0.085561	-3.5469
LIVJ(66)	6.07142	2.60203	11.5829	3.53392
ACON2(85)	7.72726	2.94996	7.05882	2.81943
YAHO(55)	0.137097	-2.86673	0.139037	-2.84646
YAHO(80)	0.119215	-3.06837	0.171123	-2.54689
ELAB(79)	0.18931	-2.40118	0.128342	-2.96193
LEUD(53)	7.72726	2.94996	5.17647	2.37197
YCCJ(7)	0.164093	-2.60742	0.160428	-2.64
HDHA(208)	0.137318	-2.86441	0.192513	-2.37697
DCEB(21)	0.157116	-2.67009	0.171123	-2.54689
TALA(249)	0.107868	-3.21266	0.235294	-2.08746
ARTJ(80)	2.57576	1.365	24.9947	4.64355
YDCY(2)	6.07142	2.60203	5.40107	2.43324
GLTB(1468)	3.4	1.76553	11.0374	3.46433
METE(172)	4.72222	2.23946	6.36364	2.66985
HDHA(102)	0.177824	-2.49148	0.203209	-2.29896
DKGA(231)	0.23416	-2.09443	0.160428	-2.64
GLTB(1461)	5	2.32193	4.95187	2.30797
GLTD(312)	12.1428	3.60203	2.78075	1.47547
PROQ(131)	3.69565	1.88583	6.93048	2.79296
METE(270)	4.72222	2.23946	4.96257	2.31109
ACON2(117)	3.26924	1.70895	7.83957	2.97078
DEOB(374)	0.111989	-3.15856	0.352941	-1.5025
METE(729)	4.47369	2.16147	4.45989	2.15701
ACON2(759)	3.26924	1.70895	6.32086	2.66012
FLIY(207)	5.31251	2.40939	3.63636	1.8625
METE(200)	5	2.32193	3.70053	1.88773
OSMC(16)	0.020403	-5.61506	0.588235	-0.765535
PURA(29)	0.075893	-3.71989	0.449198	-1.15458
GRCA(62)	2.93104	1.55141	6.64171	2.73156
METE(394)	4.72222	2.23946	3.54011	1.82379
TALA(40)	0.218509	-2.19424	0.278075	-1.84645
METE(422)	3.86363	1.94996	4.09626	2.03431
UXAC(56)	0.240113	-2.05822	0.26738	-1.90304
METE(466)	2.93104	1.55141	5.58289	2.48101
METE(538)	5	2.32193	3.12299	1.64293
ACEA(193)	0.192308	-2.37851	0.331551	-1.5927
OSMC(19)	0.242857	-2.04182	0.278075	-1.84645
METE(518)	3.4	1.76553	4.03209	2.01153
GLTB(553)	4.72222	2.23946	2.98396	1.57723
HISX(397)	5	2.32193	2.84492	1.50839
YAHO(89)	0.187225	-2.41716	0.374332	-1.41761
RPOB(1242)	3.26924	1.70895	3.61497	1.85398
PFLB(17)	0.170683	-2.55061	0.427807	-1.22497
ACEA(326)	0.180467	-2.47019	0.417112	-1.26149
COPA(19)	2.74193	1.45519	4.36364	2.12553
GLTD(375)	7.08336	2.82443	2.12834	1.08973
HIS4(107)	3.4	1.76553	3.28342	1.7152
METE(575)	2.57576	1.365	4.62032	2.20799
METE(87)	2.83333	1.5025	4	2
METE(117)	2.57576	1.365	4.47059	2.16046
ALDA(2)	0.333333	-1.58496	0.278075	-1.84645
GLPD(354)	0.270701	-1.88523	0.342246	-1.54689
PYRI(28)	3.03571	1.60204	3.52941	1.81943
PFLB(195)	0.149123	-2.74543	0.481283	-1.05504
LUXS(2)	2.65625	1.40939	4.10695	2.03807
METE(2)	3.69565	1.88583	2.83422	1.50295
ACEA(34)	0.35124	-1.50947	0.278075	-1.84645
ACEA(13)	0.382883	-1.38502	0.256684	-1.96193
YQHD(206)	0.342742	-1.5448	0.299465	-1.73954
LIVJ(71)	2.42857	1.28011	4.24599	2.0861
PEPT(158)	0.166994	-2.58213	0.491979	-1.02333
RPOC(118)	2.17949	1.12399	5.05882	2.3388
PYRI(60)	2.74193	1.45519	3.49733	1.80625
TKT2(358)	0.262346	-1.93046	0.395722	-1.33744
ACEA(201)	0.245665	-2.02524	0.417112	-1.26149
GSTA(6)	0.124451	-3.00635	0.55615	-0.846454
YQHD(16)	0.254491	-1.97431	0.417112	-1.26149
PYRI(94)	2.83333	1.5025	3.12299	1.64293
KHSE(78)	2.23684	1.16146	4.12834	2.04556
LIVJ(292)	4.47369	2.16147	2.13904	1.09696
METE(132)	2.93104	1.55141	2.83422	1.50295
ARTJ(77)	4.04762	2.01707	2.2246	1.15355
ACEA(194)	0.240113	-2.05822	0.459893	-1.12063
RPOC(781)	4.47369	2.16147	2.07487	1.05302
ACEA(308)	0.393519	-1.3455	0.31016	-1.68891
LIVK(203)	2.57576	1.365	3.13369	1.64786
NAGB(14)	0.34413	-1.53898	0.363636	-1.45943
DGAL(269)	0.367965	-1.44236	0.342246	-1.54689
RPOA(86)	0.431472	-1.21266	0.28877	-1.79201
LIVJ(242)	3.69565	1.88583	2.20321	1.13961
ZINT(80)	1.63461	0.708951	8.14973	3.02675
IDH(12)	2.42857	1.28011	3.12299	1.64293
GLNH(68)	2.93104	1.55141	2.55615	1.35397
ACCD(48)	3.03571	1.60204	2.4492	1.29231
DGAL(81)	0.280528	-1.83378	0.459893	-1.12063
OPPA(204)	1.88889	0.917537	4.6631	2.22129
AK1H(153)	3.14815	1.6545	2.33155	1.22129
LIVJ(87)	3.86363	1.94996	2.0107	1.00769
GLPK(42)	0.34	-1.55639	0.417112	-1.26149
GPMA(113)	0.386364	-1.37197	0.374332	-1.41761
RS21(25)	1.93182	0.949959	4.07487	2.02675
METE(158)	4.04762	2.01707	1.93583	0.952952
LUXS(45)	2.23684	1.16146	3.14439	1.65278
YGHO(186)	2.57576	1.365	2.63102	1.39562
PFLB(462)	0.157407	-2.66743	0.609626	-0.714004
GLTB(693)	2.74193	1.45519	2.45989	1.2986
GLPK(117)	0.418719	-1.25595	0.352941	-1.5025
GPMA(18)	0.518293	-0.948161	0.256684	-1.96193
OPPA(183)	5	2.32193	1.73262	0.792955
LIVJ(289)	3.14815	1.6545	2.14973	1.10416
PUR9(69)	2.02381	1.01707	3.43316	1.77954
GPMA(100)	0.381166	-1.39151	0.406417	-1.29897
FABG(119)	1.46552	0.55141	9.47594	3.24427
YEAG(344)	0.109114	-3.19609	0.684492	-0.546894
YDHF(265)	0.447368	-1.16047	0.352941	-1.5025
OPPA(155)	6.07142	2.60203	1.58289	0.662559
OPPA(518)	1.88889	0.917537	3.5508	1.82814
LIVJ(214)	1.97675	0.983127	3.26203	1.70577
LIVJ(79)	2.5	1.32193	2.40642	1.26689
GLTB(79)	2.02381	1.01707	3.1016	1.63302
PFLB(683)	0.447368	-1.16047	0.374332	-1.41761
GLPK(233)	0.445026	-1.16804	0.385027	-1.37697
MASY(488)	0.414634	-1.27009	0.417112	-1.26149
YGHU(100)	0.326923	-1.61298	0.502674	-0.992305
LIVJ(170)	3.14815	1.6545	1.93583	0.952952
GABT(192)	0.410628	-1.2841	0.427807	-1.22497
NDK(57)	2.2973	1.19994	2.4385	1.286
OPPA(107)	2.74193	1.45519	2.03209	1.02296
KPYK1(145)	0.34413	-1.53898	0.524064	-0.932185
CARB(475)	5.31251	2.40939	1.50802	0.592657
RL17(78)	3.14815	1.6545	1.7754	0.828145
TYRB(168)	3.14815	1.6545	1.76471	0.819428
YQHD(125)	0.15625	-2.67807	0.705882	-0.502501
CARB(202)	2.36111	1.23947	2.11765	1.08246
SYS(38)	0.132399	-2.91704	0.727273	-0.459431
PFLB(57)	0.303571	-1.71989	0.588235	-0.765535
HISJ(120)	2.74193	1.45519	1.87166	0.904317
ALDA(271)	0.497076	-1.00846	0.406417	-1.29897
RL2(265)	1.44068	0.526747	5.51872	2.46433
QOR1(9)	0.515152	-0.956931	0.406417	-1.29897
CARB(899)	2.07317	1.05184	2.25668	1.1742
LIVJ(203)	2.57576	1.365	1.85027	0.887733
ILVC(326)	2.57576	1.365	1.83957	0.87937
HPF(26)	0.349794	-1.51542	0.588235	-0.765535
SRA(16)	0.521472	-0.939337	0.427807	-1.22497
ILVC(252)	2.57576	1.365	1.7861	0.83681
PEPT(285)	0.472222	-1.08246	0.481283	-1.05504
RS11(14)	2.07317	1.05184	2.10695	1.07516
MASY(2)	0.408654	-1.29105	0.545455	-0.874468
ARTJ(96)	1.93182	0.949959	2.24599	1.16735
PFLB(725)	0.461956	-1.11417	0.502674	-0.992305
GLPK(96)	0.371179	-1.42981	0.588235	-0.765535
ACON2(7)	1.57407	0.654504	3.17647	1.66742
RPOB(191)	1.73469	0.79468	2.58824	1.37197
HNS(57)	0.648855	-0.624032	0.299465	-1.73954
GREA(43)	1.54545	0.628031	3.29412	1.71989
ARTJ(214)	1.49123	0.576501	3.54011	1.82379
MASY(46)	0.590278	-0.760534	0.385027	-1.37697
DSBA(117)	2.125	1.08746	1.94652	0.9609
ARTJ(164)	1.46552	0.55141	3.70053	1.88773
RS4(121)	1.44068	0.526747	3.91444	1.96881
RPOA(1)	2.5	1.32193	1.70053	0.765989
ASSY(205)	2.02381	1.01707	1.98931	0.992264
GPMA(146)	0.634328	-0.656699	0.352941	-1.5025
GPMA(226)	0.485714	-1.04182	0.524064	-0.932185
METE(449)	1.97675	0.983127	1.97861	0.984487
OSMC(120)	0.726496	-0.460974	0.235294	-2.08746
THRC(107)	1.80851	0.854803	2.18182	1.12553
ARGD(324)	1.84783	0.88583	2.10695	1.07516
GLYA(296)	0.578231	-0.790282	0.438503	-1.18934
CARB(993)	2.23684	1.16146	1.73262	0.792955
GLPD(136)	0.664063	-0.590609	0.342246	-1.54689
YGGE(179)	0.485714	-1.04182	0.545455	-0.874468
AAT(246)	0.400943	-1.31853	0.620321	-0.688913
RPOC(50)	2.57576	1.365	1.58289	0.662559
PUR2(153)	1.80851	0.854803	2.06417	1.04556
ACEA(391)	0.228495	-2.12977	0.748663	-0.417612
GLPK(258)	0.461956	-1.11417	0.57754	-0.792007
GLNA(353)	2.83333	1.5025	1.49733	0.582388
SYV(342)	1.84783	0.88583	1.97861	0.984487
ENTB(215)	0.653846	-0.612977	0.374332	-1.41761
PFLB(312)	0.524691	-0.930459	0.524064	-0.932185
ACEA(212)	0.607143	-0.719892	0.438503	-1.18934
ILVC(336)	2.17949	1.12399	1.68984	0.756887
LIVJ(59)	1.46552	0.55141	2.84492	1.50839
ADHE(695)	0.541401	-0.88523	0.524064	-0.932185
RL6(99)	1.7	0.765535	2.06417	1.04556
CARA(146)	2.02381	1.01707	1.71123	0.775034
LIVK(153)	1.77083	0.824428	1.92513	0.944959
OSMY(64)	0.57047	-0.809777	0.513369	-0.961932
RL15(84)	1.54545	0.628031	2.32086	1.21466
RL14(1)	2.07317	1.05184	1.64706	0.719892
ENTA(15)	0.541401	-0.88523	0.55615	-0.846454
RL28(10)	2.23684	1.16146	1.5615	0.64293
METK(37)	0.548387	-0.866733	0.55615	-0.846454
CHEY(26)	1.84783	0.88583	1.7754	0.828145
RL6(85)	1.26866	0.343302	4.38503	2.13259
RPOB(844)	1.39344	0.478654	2.87701	1.52457
ADHE(148)	0.685484	-0.544806	0.395722	-1.33744
FLIY(206)	1.30769	0.387023	3.64706	1.86673
PURA(367)	0.512048	-0.965648	0.59893	-0.739541
GLRX4(101)	2.23684	1.16146	1.52941	0.612977
TIG(287)	2.07317	1.05184	1.58289	0.662559
PFLB(162)	0.607143	-0.719892	0.513369	-0.961932
LIVJ(187)	1.51786	0.602035	2.2139	1.14659
RL28(26)	2.2973	1.19994	1.48663	0.572047
OSMY(158)	0.442708	-1.17557	0.673797	-0.569614
ILVC(109)	1.73469	0.79468	1.7754	0.828145
PURA(268)	0.615942	-0.699133	0.524064	-0.932185
LIVJ(153)	1.84783	0.88583	1.65775	0.72923
CARB(366)	1.63461	0.708951	1.87166	0.904317
ASSY(34)	1.88889	0.917537	1.61497	0.69151
FLIY(85)	1.73469	0.79468	1.73262	0.792955
ADHE(277)	0.277778	-1.848	0.791444	-0.337441
ILVC(81)	1.73469	0.79468	1.71123	0.775034
OPPA(494)	1.66667	0.736966	1.7754	0.828145
ODO2(2)	1.77083	0.824428	1.66845	0.738508
SYD(370)	0.53125	-0.912537	0.631016	-0.664252
ZAPB(61)	2.23684	1.16146	1.42246	0.508388
SUCD(285)	1.44068	0.526747	2.14973	1.10416
IHFA(66)	0.658915	-0.601836	0.513369	-0.961932
ADHE(228)	0.586207	-0.770518	0.59893	-0.739541
GLRX2(107)	0.399061	-1.32532	0.748663	-0.417612
GLRX3(9)	1.23188	0.300866	3.5615	1.83248
CODA(93)	2.42857	1.28011	1.34759	0.430386
RPOC(521)	2.07317	1.05184	1.43315	0.519195
SUCC(146)	1.39344	0.478654	2.19251	1.13258
LIVK(242)	1.26866	0.343302	2.98396	1.57723
RS7(56)	1.60377	0.681471	1.73262	0.792955
IF2(404)	1.77083	0.824428	1.57219	0.652778
CARB(429)	1.84783	0.88583	1.51872	0.602853
IHFB(27)	0.732759	-0.44859	0.438503	-1.18934
HIS7(331)	1.63461	0.708951	1.67914	0.747726
PYRB(30)	2.02381	1.01707	1.43315	0.519195
CH60(160)	0.422886	-1.24166	0.748663	-0.417612
ACEA(52)	0.445026	-1.16804	0.737968	-0.43837
POTD(302)	1.39344	0.478654	2.08556	1.06044
OPPA(281)	1.44068	0.526747	1.94652	0.9609
ADHE(288)	0.262346	-1.93046	0.834225	-0.261492
ILVC(348)	1.77083	0.824428	1.51872	0.602853
PURA(141)	0.708333	-0.4975	0.502674	-0.992305
THRC(291)	2.125	1.08746	1.36898	0.453106
OPPA(527)	1.57407	0.654504	1.66845	0.738508
PNP(302)	1.93182	0.949959	1.42246	0.508388
TPIS(103)	0.467033	-1.0984	0.737968	-0.43837
PURA(293)	0.582192	-0.780434	0.652406	-0.616158
DNAK(548)	0.607143	-0.719892	0.631016	-0.664252
THRC(344)	1.60377	0.681471	1.62567	0.701033
RS14(76)	2.23684	1.16146	1.3262	0.407302
RS10(82)	1.77083	0.824428	1.48663	0.572047
GLRX2(22)	0.720339	-0.473252	0.502674	-0.992305
IHFA(24)	0.664063	-0.590609	0.57754	-0.792007
AAT(134)	0.566667	-0.819428	0.673797	-0.569614
PLIG(33)	0.674603	-0.567889	0.566845	-0.818974
OPPA(365)	1.49123	0.576501	1.73262	0.792955
RL23(82)	1.49123	0.576501	1.72192	0.784022
GCSP(306)	0.648855	-0.624032	0.609626	-0.714004
PURA(50)	0.512048	-0.965648	0.727273	-0.459431
PUR2(78)	1.44068	0.526747	1.7861	0.83681
TYPA(337)	3.03571	1.60204	1.20856	0.273284
OPPA(220)	2.02381	1.01707	1.34759	0.430386
AK3(292)	0.472222	-1.08246	0.759358	-0.397148
RL27(44)	1.97675	0.983127	1.34759	0.430386
UPP(116)	1.34921	0.432112	1.96791	0.976667
ENO(120)	0.598592	-0.740356	0.673797	-0.569614
GREA(116)	2.23684	1.16146	1.28342	0.359996
AK3(190)	0.708333	-0.4975	0.566845	-0.818974
RS1(260)	1.7	0.765535	1.44385	0.529921
ADHE(759)	0.70248	-0.509472	0.57754	-0.792007
LUXS(23)	1.34921	0.432112	1.90374	0.928839
PUR9(17)	1.39344	0.478654	1.7861	0.83681
DHAS(104)	0.562914	-0.829014	0.716578	-0.480804
GLNH(188)	1.7	0.765535	1.43315	0.519195
FETP(28)	1.57407	0.654504	1.51872	0.602853
PANC(151)	1.46552	0.55141	1.63636	0.710494
SYA(784)	1.54545	0.628031	1.54011	0.623031
RS6(56)	1.19718	0.259644	2.79144	1.48101
RL21(60)	1.46552	0.55141	1.61497	0.69151
RL14(23)	1.37097	0.455194	1.76471	0.819428
OPPA(501)	1.37097	0.455194	1.76471	0.819428
POTD(273)	1.7	0.765535	1.39037	0.475473
PURA(82)	0.562914	-0.829014	0.737968	-0.43837
CH60(327)	0.578231	-0.790282	0.727273	-0.459431
RS1(43)	1.88889	0.917537	1.31551	0.39562
STPA(32)	1.34921	0.432112	1.76471	0.819428
RMF(26)	0.167984	-2.5736	0.909091	-0.137503
SYFA(75)	1.51786	0.602035	1.49733	0.582388
DPPA(105)	1.63461	0.708951	1.40107	0.486529
ARTI(128)	1.60377	0.681471	1.41176	0.4975
MASY(22)	0.720339	-0.473252	0.609626	-0.714004
ODO2(196)	1.84783	0.88583	1.29412	0.371969
RL29(9)	1.54545	0.628031	1.43315	0.519195
RS8(56)	1.57407	0.654504	1.41176	0.4975
AROG(70)	1.51786	0.602035	1.45454	0.540568
RL7/12(109)	3.4	1.76553	1.13369	0.181026
NFUA(165)	1.54545	0.628031	1.42246	0.508388
GSTA(201)	0.708333	-0.4975	0.641711	-0.640004
DHAS(284)	0.708333	-0.4975	0.641711	-0.640004
ZNUA(161)	1.97675	0.983127	1.25134	0.32347
RS21(40)	1.57407	0.654504	1.39037	0.475473
IF3(164)	2.125	1.08746	1.21925	0.285995
DNAK(577)	0.674603	-0.567889	0.684492	-0.546894
TIG(390)	1.26866	0.343302	1.86096	0.896049
ARCA(160)	0.494186	-1.01687	0.812834	-0.298967
ORN(138)	0.669291	-0.579294	0.705882	-0.502501
EFG(354)	2.02381	1.01707	1.21925	0.285995
ARCA(195)	0.714286	-0.485427	0.663102	-0.592697
ACEA(63)	0.801887	-0.31853	0.534759	-0.903039
RS1(320)	1.11842	0.161463	3.40107	1.76599
RL16(34)	1.49123	0.576501	1.40107	0.486529
CH60(142)	0.598592	-0.740356	0.770053	-0.37697
EFTU1(177),EFTU2(177)	2.17949	1.12399	1.18717	0.247522
RS2(11)	1.84783	0.88583	1.24064	0.311087
GLTI(185)	2.36111	1.23947	1.16578	0.221289
CH60(80)	0.648855	-0.624032	0.737968	-0.43837
ZINT(157)	1.51786	0.602035	1.36898	0.453106
GCH1(129)	0.515152	-0.956931	0.823529	-0.280109
RS3(89)	1.32812	0.409391	1.57219	0.652778
RS2(143)	1.51786	0.602035	1.35829	0.44179
GLGC(42)	0.615942	-0.699133	0.770053	-0.37697
CH60(42)	0.634328	-0.656699	0.759358	-0.397148
RNB(68)	1.23188	0.300866	1.81818	0.862497
RS4(83)	1.57407	0.654504	1.31551	0.39562
RL9(89)	1.73469	0.79468	1.25134	0.32347
CAPP(746)	1.66667	0.736966	1.27273	0.347923
RS1(150)	1.54545	0.628031	1.3262	0.407302
RS11(57)	1.41667	0.502501	1.42246	0.508388
RL15(63)	1.39344	0.478654	1.44385	0.529921
ILVC(39)	1.28788	0.364996	1.61497	0.69151
PURA(125)	0.867347	-0.205319	0.427807	-1.22497
CARB(379)	1.44068	0.526747	1.39037	0.475473
RL9(112)	1.39344	0.478654	1.43315	0.519195
RS3(108)	1.49123	0.576501	1.34759	0.430386
YDGH(54)	1.32812	0.409391	1.51872	0.602853
LIVK(79)	1.1039	0.142605	3.29412	1.71989
AAT(276)	0.833333	-0.263034	0.534759	-0.903039
AK3(257)	0.664063	-0.590609	0.759358	-0.397148
PYRB(245)	1.54545	0.628031	1.29412	0.371969
OPPA(93)	1.39344	0.478654	1.40107	0.486529
GLYA(346)	0.461956	-1.11417	0.86631	-0.207045
ZNUA(199)	1.30769	0.387023	1.50802	0.592657
RL4(106)	1.51786	0.602035	1.29412	0.371969
RPOA(271)	1.84783	0.88583	1.18717	0.247522
TPX(33)	1.32812	0.409391	1.44385	0.529921
RL5(120)	1.39344	0.478654	1.36898	0.453106
CARB(1006)	1.25	0.321928	1.59358	0.672274
ILVC(266)	1.77083	0.824428	1.19786	0.260461
RL6(6)	1.23188	0.300866	1.63636	0.710494
RS1(464)	1.51786	0.602035	1.27273	0.347923
OPPA(284)	1.13333	0.180572	2.2246	1.15355
RL1(105)	1.32812	0.409391	1.41176	0.4975
LEU1(249)	0.70248	-0.509472	0.759358	-0.397148
MODA(115)	0.648855	-0.624032	0.802139	-0.318076
ASSY(391)	1.11842	0.161463	2.34225	1.22789
RL28(54)	2.02381	1.01707	1.14438	0.194572
SECB(34)	1.28788	0.364996	1.45454	0.540568
RS11(87)	1.18056	0.239466	1.76471	0.819428
RL35(25)	2.23684	1.16146	1.12299	0.167352
RS7(171)	1.21429	0.280109	1.61497	0.69151
RL9(57)	1.26866	0.343302	1.47594	0.56163
ENTE(441)	0.70248	-0.509472	0.770053	-0.37697
GLMS(51)	1.66667	0.736966	1.19786	0.260461
RS4(156)	1.46552	0.55141	1.27273	0.347923
DNAK(245)	0.674603	-0.567889	0.791444	-0.337441
ODP1(341)	0.825243	-0.27711	0.620321	-0.688913
RL13(123)	1.25	0.321928	1.50802	0.592657
DHAS(232)	0.502959	-0.991488	0.877005	-0.189343
RS8(69)	1.54545	0.628031	1.22995	0.298596
GLYA(331)	0.696721	-0.521346	0.780749	-0.357069
GLTB(769)	1.16438	0.219566	1.76471	0.819428
POTD(322)	1.51786	0.602035	1.22995	0.298596
ZNUA(130)	1.51786	0.602035	1.22995	0.298596
RS3(62)	1.44068	0.526747	1.26203	0.335748
RL5(88)	1.18056	0.239466	1.66845	0.738508
FABZ(2)	1.63461	0.708951	1.18717	0.247522
G6PI(514)	0.758929	-0.397964	0.737968	-0.43837
AAT(116)	0.913978	-0.129768	0.395722	-1.33744
AAT(51)	0.634328	-0.656699	0.834225	-0.261492
PTKB(87)	1.54545	0.628031	1.20856	0.273284
YIFE(98)	1.28788	0.364996	1.37968	0.464333
GLTB(1123)	1.41667	0.502501	1.26203	0.335748
DBHA(13)	1.1039	0.142605	2.24599	1.16735
RL13(121)	1.21429	0.280109	1.50802	0.592657
OPDA(303)	0.726496	-0.460974	0.780749	-0.357069
UDP(235)	0.274194	-1.86673	0.941176	-0.087464
DAPB(1)	0.858586	-0.219966	0.59893	-0.739541
CH10(1)	0.674603	-0.567889	0.823529	-0.280109
RL4(74)	1.30769	0.387023	1.3262	0.407302
RL2(71)	1.21429	0.280109	1.47594	0.56163
CH60(242)	0.876289	-0.190521	0.566845	-0.818974
RL29(44)	1.25	0.321928	1.39037	0.475473
PFLB(745)	0.363248	-1.46097	0.930481	-0.103951
RS7(11)	1.19718	0.259644	1.49733	0.582388
PTGA(148)	1.19718	0.259644	1.49733	0.582388
TYRB(247)	1.44068	0.526747	1.21925	0.285995
RS5(156)	1.16438	0.219566	1.60428	0.681924
YAJL(167)	0.512048	-0.965648	0.898396	-0.154577
ZNUA(289)	1.84783	0.88583	1.12299	0.167352
G6PI(80)	0.582192	-0.780434	0.877005	-0.189343
GPMA(5)	0.955056	-0.066343	0.213904	-2.22497
TRPB(87)	1.16438	0.219566	1.59358	0.672274
SUCC(205)	1.23188	0.300866	1.40107	0.486529
G6PI(449)	0.817308	-0.291048	0.705882	-0.502501
DNAK(304)	0.85	-0.234466	0.652406	-0.616158
CISY(38)	0.85	-0.234466	0.652406	-0.616158
KPYK1(76)	0.562914	-0.829014	0.887701	-0.171854
YEBC(37)	1.46552	0.55141	1.18717	0.247522
KPYK1(208)	0.923913	-0.114171	0.438503	-1.18934
AHPC(93)	0.639098	-0.645892	0.86631	-0.207045
CH60(34)	0.85	-0.234466	0.673797	-0.569614
RS7(149)	1.18056	0.239466	1.46524	0.551138
KPYK1(68)	0.422886	-1.24166	0.930481	-0.103951
SYT(577)	1.7	0.765535	1.12299	0.167352
TIG(279)	2.02381	1.01707	1.09091	0.125531
CAPP(94)	1.25	0.321928	1.31551	0.39562
RL11(100)	3.54167	1.82443	1.04813	0.067815
RL2(59)	1.26866	0.343302	1.28342	0.359996
RL9(35)	1.13333	0.180572	1.60428	0.681924
RS17(43)	1.23188	0.300866	1.3262	0.407302
TPX(2)	1.30769	0.387023	1.24064	0.311087
RL16(62)	1.34921	0.432112	1.20856	0.273284
BCCP(8)	0.876289	-0.190521	0.652406	-0.616158
RS10(59)	1.16438	0.219566	1.44385	0.529921
DPPA(259)	1.13333	0.180572	1.5615	0.64293
RL15(109)	1.25	0.321928	1.28342	0.359996
PSS(9)	0.944444	-0.082463	0.385027	-1.37697
DAPB(163)	0.472222	-1.08246	0.930481	-0.103951
ARGD(117)	1.21429	0.280109	1.31551	0.39562
DHAS(2)	0.923913	-0.114171	0.513369	-0.961932
RL6(2)	1.19718	0.259644	1.3369	0.418889
RS1(229)	1.39344	0.478654	1.16578	0.221289
RL18(17)	1.18056	0.239466	1.35829	0.44179
METK(246)	0.867347	-0.205319	0.705882	-0.502501
KPYK1(421)	0.867347	-0.205319	0.705882	-0.502501
KPYK1(13)	0.161597	-2.62953	0.973262	-0.0391
RL13(23)	2.07317	1.05184	1.06952	0.096962
PYRB(280)	1.37097	0.455194	1.16578	0.221289
RS10(11)	1.73469	0.79468	1.09091	0.125531
SYA(74)	1.28788	0.364996	1.20856	0.273284
ILVC(155)	1.28788	0.364996	1.20856	0.273284
SUCC(295)	1.16438	0.219566	1.36898	0.453106
DAPB(111)	0.904256	-0.145197	0.631016	-0.664252
RS5(126)	1.11842	0.161463	1.50802	0.592657
ODO2(300)	1.34921	0.432112	1.16578	0.221289
SYQ(195)	1.44068	0.526747	1.13369	0.181026
RS6(35)	1.39344	0.478654	1.14438	0.194572
DLDH(299)	1.25	0.321928	1.21925	0.285995
G6PI(208)	0.720339	-0.473252	0.877005	-0.189343
CH60(498)	0.904256	-0.145197	0.652406	-0.616158
ZNUA(215)	1.54545	0.628031	1.1016	0.139606
LEU1(252)	0.562914	-0.829014	0.930481	-0.103951
YEAD(281)	1.28788	0.364996	1.17647	0.234466
GLYA(308)	0.758929	-0.397964	0.86631	-0.207045
PFKA(237)	0.867347	-0.205319	0.759358	-0.397148
EFTU1(10),EFTU2(10)	1.39344	0.478654	1.12299	0.167352
LEU1(490)	0.876289	-0.190521	0.748663	-0.417612
TPIS(28)	0.923913	-0.114171	0.620321	-0.688913
SYFA(2)	1.93182	0.949959	1.05882	0.082463
PPIB(60)	0.537975	-0.89439	0.941176	-0.087464
RL21(81),GNTK(92)	1.21429	0.280109	1.20856	0.273284
ZNUA(172)	2.17949	1.12399	1.04813	0.067815
SYW(2)	1.08974	0.123989	1.52941	0.612977
RS1(450)	1.08974	0.123989	1.51872	0.602853
GRPE(66)	0.867347	-0.205319	0.780749	-0.357069
RL24(97)	1.11842	0.161463	1.36898	0.453106
GLTI(80)	1.18056	0.239466	1.22995	0.298596
RS2(59)	2.07317	1.05184	1.04813	0.067815
ARCA(210)	0.858586	-0.219966	0.802139	-0.318076
CH60(122)	0.841584	-0.24882	0.823529	-0.280109
RBSB(253)	1.13333	0.180572	1.30481	0.383843
G3P1(213)	0.518293	-0.948161	0.951872	-0.071161
ENO(231)	0.85	-0.234466	0.823529	-0.280109
SYFA(179)	1.88889	0.917537	1.04813	0.067815
ENO(266)	0.841584	-0.24882	0.84492	-0.243113
SYD(513)	0.817308	-0.291048	0.86631	-0.207045
ARTI(77)	1.39344	0.478654	1.09091	0.125531
EFTU1(300),EFTU2(300)	1.30769	0.387023	1.1123	0.153545
RL20(41)	1.21429	0.280109	1.15508	0.207993
RPOB(1262)	1.08974	0.123989	1.37968	0.464333
PEPQ(149)	0.867347	-0.205319	0.823529	-0.280109
SYL(146)	1.26866	0.343302	1.12299	0.167352
FABB(127)	0.582192	-0.780434	0.951872	-0.071161
TYSY(259)	1.04938	0.069541	1.73262	0.792955
RS5(52)	1.34921	0.432112	1.09091	0.125531
RL17(99)	1.25	0.321928	1.12299	0.167352
RL2(207)	1.46552	0.55141	1.06952	0.096962
SERA(314)	0.825243	-0.27711	0.877005	-0.189343
KPRS(111)	1.14865	0.199938	1.19786	0.260461
RL34(11)	1.7	0.765535	1.04813	0.067815
MDH(54)	0.841584	-0.24882	0.86631	-0.207045
OSMY(118)	0.674603	-0.567889	0.941176	-0.087464
AROA(22)	1.07595	0.10561	1.36898	0.453106
FABG(99)	1.21429	0.280109	1.12299	0.167352
TKT1(23)	1.39344	0.478654	1.06952	0.096962
RL10(37)	1.14865	0.199938	1.16578	0.221289
ENO(62)	0.913978	-0.129768	0.791444	-0.337441
EFG(609)	1.23188	0.300866	1.1016	0.139606
MENB(54)	0.894737	-0.160465	0.834225	-0.261492
PPIB(137)	0.894737	-0.160465	0.834225	-0.261492
RL19(63)	1.28788	0.364996	1.08021	0.111317
CAPP(855)	1.19718	0.259644	1.1123	0.153545
RS1(247)	1.16438	0.219566	1.13369	0.181026
RS1(504)	1.03659	0.051839	1.70053	0.765989
RS7(25)	1.32812	0.409391	1.06952	0.096962
RL3(8)	1.66667	0.736966	1.03743	0.053018
ODO2(156)	1.04938	0.069541	1.47594	0.56163
PURU(93)	1.03659	0.051839	1.65775	0.72923
6PGD(454)	0.858586	-0.219966	0.887701	-0.171854
RL5(145)	1.37097	0.455194	1.05882	0.082463
SERC(20)	1.30769	0.387023	1.06952	0.096962
IMDH(207)	0.955056	-0.066343	0.684492	-0.546894
HNS(32)	0.833333	-0.263034	0.909091	-0.137503
COABC(385)	0.876289	-0.190521	0.877005	-0.189343
GUAA(386)	1.25	0.321928	1.08021	0.111317
SYFA(64)	1.25	0.321928	1.08021	0.111317
EFTU1(314),EFTU2(314)	1.04938	0.069541	1.42246	0.508388
RL2(97)	1.07595	0.10561	1.25134	0.32347
MAO2(344)	1.41667	0.502501	1.04813	0.067815
RS9(100)	1.84783	0.88583	1.02674	0.038068
EFTU1(57),EFTU2(57)	1.11842	0.161463	1.15508	0.207993
KAD(184)	1.07595	0.10561	1.22995	0.298596
HIS6(84)	1.04938	0.069541	1.36898	0.453106
DBHB(67)	1.18056	0.239466	1.09091	0.125531
RIDA(115),TDCF(115)	1.34921	0.432112	1.04813	0.067815
ZNUA(178)	1.7	0.765535	1.02674	0.038068
IMDH(411)	0.794392	-0.332077	0.941176	-0.087464
RRF(80)	0.944444	-0.082463	0.791444	-0.337441
EFTU1(253),EFTU2(253)	1.32812	0.409391	1.04813	0.067815
RS12(44)	2.2973	1.19994	1.01604	0.022961
IF1(64)	1.01191	0.017074	2.78075	1.47547
PT1(250)	1.0625	0.087464	1.21925	0.285995
EFG(271)	0.904256	-0.145197	0.887701	-0.171854
CAPP(676)	1.57407	0.654504	1.02674	0.038068
6PGD(38)	0.732759	-0.44859	0.962567	-0.055041
CYSK(121)	0.85	-0.234466	0.930481	-0.103951
SYT(33)	1.0241	0.034351	1.62567	0.701033
LRP(129)	1.01191	0.017074	2.52406	1.33575
STPA(117)	1.01191	0.017074	2.45989	1.2986
RL13(68)	1.93182	0.949959	1.01604	0.022961
MODA(85)	1.04938	0.069541	1.22995	0.298596
FABI(205)	1.0625	0.087464	1.17647	0.234466
MODA(202)	1.84783	0.88583	1.01604	0.022961
CARB(504)	1.80851	0.854803	1.01604	0.022961
MURE(439)	0.885416	-0.175572	0.930481	-0.103951
TALB(50)	1.04938	0.069541	1.19786	0.260461
GLNA(386)	1.13333	0.180572	1.06952	0.096962
EFTU1(264),EFTU2(264)	1.13333	0.180572	1.06952	0.096962
IDH(4)	1.37097	0.455194	1.02674	0.038068
EFG(485)	1.07595	0.10561	1.1123	0.153545
MAO2(237)	1.11842	0.161463	1.06952	0.096962
EFTU1(325),EFTU2(325)	0.885416	-0.175572	0.941176	-0.087464
PYRB(179)	1.16438	0.219566	1.04813	0.067815
EFTU1(249),EFTU2(249)	0.988372	-0.016874	0.545455	-0.874468
GLPK(5)	1.28788	0.364996	1.02674	0.038068
MTNN(124)	1.08974	0.123989	1.08021	0.111317
KPRS(231)	0.664063	-0.590609	0.983957	-0.023333
RS2(73)	1.0241	0.034351	1.30481	0.383843
ACP(10)	1.04938	0.069541	1.13369	0.181026
GHRB(9)	0.885416	-0.175572	0.951872	-0.071161
IMDH(88)	0.801887	-0.31853	0.973262	-0.0391
IDH(265)	1.44068	0.526747	1.01604	0.022961
ACSA(585)	0.338645	-1.56215	0.994652	-0.007736
PUR8(155)	1.1039	0.142605	1.05882	0.082463
SKP(97)	1.08974	0.123989	1.05882	0.082463
PUR4(73)	1.01191	0.017074	1.50802	0.592657
PFLB(386)	0.435897	-1.19794	0.994652	-0.007736
SUCC(1)	1.0241	0.034351	1.19786	0.260461
RS1(363)	1.01191	0.017074	1.41176	0.4975
IDH(100)	0.965909	-0.050041	0.898396	-0.154577
SYW(181)	1.0625	0.087464	1.05882	0.082463
EFG(430)	1.04938	0.069541	1.06952	0.096962
SYS(86)	0.955056	-0.066343	0.941176	-0.087464
OMPA(315)	0.913978	-0.129768	0.973262	-0.0391
SYK1(132)	1.08974	0.123989	1.02674	0.038068
PT1(238)	1.0625	0.087464	1.03743	0.053018
RL17(56)	1.01191	0.017074	1.19786	0.260461
RL31B(60)	1.44068	0.526747	1.00535	0.007695
EFTU1(38),EFTU2(38)	1.39344	0.478654	1.00535	0.007695
IDH(20)	1.03659	0.051839	1.04813	0.067815
RS1(272)	1.30769	0.387023	1.00535	0.007695
G3P1(108)	1.01191	0.017074	1.1016	0.139606
GHRB(89)	1.0241	0.034351	1.04813	0.067815
IDH(199)	0.965909	-0.050041	0.973262	-0.0391
ILVE(160)	0.988372	-0.016874	0.941176	-0.087464
TKT1(254)	0.904256	-0.145197	0.994652	-0.007736
PGK(373)	1.1039	0.142605	1.00535	0.007695
MDH(279)	1.1039	0.142605	1.00535	0.007695
ODP1(458)	1.07595	0.10561	1.00535	0.007695
FABH(214)	1	0	1.01604	0.022961
RS1(411)	1	0	2.19251	1.13258
G3P1(192)	0.944444	-0.082463	1.00535	0.007695
CYSK(2)	0.944444	-0.082463	1.00535	0.007695
SYR(473)	0.923913	-0.114171	1.00535	0.007695
DHE4(44)	1.08974	0.123989	0.994652	-0.007736
G3P1(331)	1.16438	0.219566	0.994652	-0.007736
CYSK(3)	0.85	-0.234466	1.00535	0.007695
IMDH(396)	1.01191	0.017074	0.919786	-0.12063
AHPC(169)	0.817308	-0.291048	1.00535	0.007695
ODP2(410)	1.01191	0.017074	0.909091	-0.137503
EFG(440)	0.988372	-0.016874	1.1123	0.153545
LRP(36)	1.28788	0.364996	0.994652	-0.007736
AROF(98),AROG(97)	0.988372	-0.016874	1.12299	0.167352
IDH(401)	0.977012	-0.033552	1.06952	0.096962
IDH(404)	0.977012	-0.033552	1.06952	0.096962
SYL(738)	0.988372	-0.016874	1.14438	0.194572
IMDH(156)	0.988372	-0.016874	1.14438	0.194572
DAPD(263)	1.0241	0.034351	0.930481	-0.103951
FABI(201)	0.977012	-0.033552	1.09091	0.125531
EFTU1(295),EFTU2(295)	1.46552	0.55141	0.994652	-0.007736
PGK(156)	0.955056	-0.066343	1.04813	0.067815
YEBC(55)	1.04938	0.069541	0.951872	-0.071161
ALF(20)	1.04938	0.069541	0.951872	-0.071161
EFEO(355)	1.0241	0.034351	0.887701	-0.171854
EFG(143)	0.955056	-0.066343	1.06952	0.096962
SYP(34)	0.988372	-0.016874	1.31551	0.39562
HEM2(247)	0.809524	-0.304854	1.01604	0.022961
KPYK2(102)	0.515152	-0.956931	1.00535	0.007695
6PGD(301)	1.01191	0.017074	0.737968	-0.43837
DBHB(18)	1.07595	0.10561	0.951872	-0.071161
PYRG(479)	0.988372	-0.016874	1.36898	0.453106
SYL(813)	1.03659	0.051839	0.887701	-0.171854
PGK(49)	1.03659	0.051839	0.887701	-0.171854
EFG(323)	0.965909	-0.050041	1.13369	0.181026
ALF(9)	1.04938	0.069541	0.909091	-0.137503
SYK1(156)	0.944444	-0.082463	1.09091	0.125531
DNAK(55)	0.720339	-0.473252	1.01604	0.022961
AHPC(80)	0.817308	-0.291048	1.02674	0.038068
KPYK2(160)	0.904256	-0.145197	1.05882	0.082463
TALB(262)	1.1039	0.142605	0.941176	-0.087464
DHE4(286)	1.03659	0.051839	0.84492	-0.243113
PFLA(163)	0.876289	-0.190521	1.04813	0.067815
RS4(22)	0.988372	-0.016874	1.72192	0.784022
YDJA(101)	0.867347	-0.205319	1.04813	0.067815
IMDH(479)	0.833333	-0.263034	1.03743	0.053018
SYI(183)	0.965909	-0.050041	1.21925	0.285995
NFUA(14)	0.923913	-0.114171	1.09091	0.125531
6PGD(75)	0.752212	-0.410788	1.02674	0.038068
G6PD(139)	1.04938	0.069541	0.855615	-0.224966
EFG(389)	0.944444	-0.082463	1.14438	0.194572
GPMA(239)	0.234807	-2.09045	1.00535	0.007695
ZNUA(249)	0.965909	-0.050041	1.26203	0.335748
ALF(52)	0.934066	-0.098403	1.13369	0.181026
YFBT(46)	1.0625	0.087464	0.86631	-0.207045
RS16(46)	0.977012	-0.033552	1.45454	0.540568
PLIG(106)	0.714286	-0.485427	1.02674	0.038068
G3P1(124)	0.825243	-0.27711	1.04813	0.067815
DCYD(230)	0.955056	-0.066343	1.21925	0.285995
TKT1(316)	0.934066	-0.098403	1.14438	0.194572
TALB(250)	1.04938	0.069541	0.823529	-0.280109
GLYA(354)	0.885416	-0.175572	1.08021	0.111317
PGK(193)	0.691057	-0.533124	1.02674	0.038068
RL1(167)	1.88889	0.917537	0.983957	-0.023333
LEU3(160)	1.13333	0.180572	0.919786	-0.12063
RL3(38)	0.745614	-0.423499	1.03743	0.053018
EFEO(221)	0.867347	-0.205319	1.08021	0.111317
RISB(39)	1.21429	0.280109	0.941176	-0.087464
SERC(2)	1.1039	0.142605	0.887701	-0.171854
ENO(333)	0.639098	-0.645892	1.02674	0.038068
ALKH(144)	0.894737	-0.160465	1.1123	0.153545
SYP(12)	0.955056	-0.066343	1.30481	0.383843
GLTB(908)	1.28788	0.364996	0.951872	-0.071161
YBIC(190)	0.904256	-0.145197	1.13369	0.181026
RS20(49)	0.965909	-0.050041	1.44385	0.529921
RL19(87)	0.944444	-0.082463	1.26203	0.335748
G6PD(25)	0.904256	-0.145197	1.14438	0.194572
EFG(532)	0.867347	-0.205319	1.1016	0.139606
FABI(17)	0.913978	-0.129768	1.16578	0.221289
DHE4(276)	1.18056	0.239466	0.919786	-0.12063
CAPP(789)	0.944444	-0.082463	1.28342	0.359996
PGK(5)	0.894737	-0.160465	1.14438	0.194572
KAD(13)	0.955056	-0.066343	1.39037	0.475473
YBIC(307)	0.944444	-0.082463	1.30481	0.383843
LEU1(110)	0.765766	-0.385025	1.05882	0.082463
EFTU1(188),EFTU2(188)	1.80851	0.854803	0.973262	-0.0391
AHPC(171)	0.708333	-0.4975	1.04813	0.067815
AHPC(153)	0.745614	-0.423499	1.05882	0.082463
AROG(105)	0.833333	-0.263034	1.1016	0.139606
ENO(325)	1.07595	0.10561	0.780749	-0.357069
HNS(96)	0.726496	-0.460974	1.05882	0.082463
KPYK1(382)	0.607143	-0.719892	1.03743	0.053018
6PGD(458)	0.841584	-0.24882	1.1123	0.153545
APT(23)	0.809524	-0.304854	1.09091	0.125531
DHAS(203)	1.03659	0.051839	0.59893	-0.739541
TYRB(92)	1.97675	0.983127	0.973262	-0.0391
DBHA(22)	0.965909	-0.050041	1.71123	0.775034
SERA(39)	0.720339	-0.473252	1.05882	0.082463
GCH1(95)	1.08974	0.123989	0.802139	-0.318076
POTF(122)	0.772727	-0.371969	1.08021	0.111317
MDH(82)	1.16438	0.219566	0.877005	-0.189343
RL11(113)	0.923913	-0.114171	1.29412	0.371969
SERA(22)	0.867347	-0.205319	1.15508	0.207993
AROG(25)	0.894737	-0.160465	1.20856	0.273284
EFTS(247)	0.858586	-0.219966	1.15508	0.207993
FETP(64)	0.965909	-0.050041	1.89305	0.920711
MANA(280)	0.801887	-0.31853	1.1123	0.153545
TIG(327)	0.934066	-0.098403	1.42246	0.508388
RL6(44)	0.885416	-0.175572	1.21925	0.285995
PANB(228)	0.867347	-0.205319	1.18717	0.247522
G3P1(257)	1.41667	0.502501	0.930481	-0.103951
RS2(105)	0.894737	-0.160465	1.26203	0.335748
DHE4(397)	0.825243	-0.27711	1.14438	0.194572
IDH(142)	0.913978	-0.129768	1.3369	0.418889
RS10(30)	0.894737	-0.160465	1.27273	0.347923
EFTU1(5),EFTU2(5)	0.876289	-0.190521	1.22995	0.298596
SYM(597)	0.858586	-0.219966	1.19786	0.260461
NADE(112)	0.858586	-0.219966	1.19786	0.260461
RL362(37)	2.07317	1.05184	0.962567	-0.055041
SYV(820)	0.858586	-0.219966	1.20856	0.273284
AK3(280)	0.817308	-0.291048	1.15508	0.207993
YDHI(2)	0.68	-0.556393	1.08021	0.111317
TRPB(392)	0.923913	-0.114171	1.46524	0.551138
SYL(837)	0.85	-0.234466	1.20856	0.273284
MTLD(287)	0.515152	-0.956931	1.04813	0.067815
RS19(70)	0.825243	-0.27711	1.17647	0.234466
IMDH(72)	0.664063	-0.590609	1.08021	0.111317
IDH(387)	0.574324	-0.800062	1.05882	0.082463
EFG(153)	0.85	-0.234466	1.21925	0.285995
EFG(562)	0.85	-0.234466	1.21925	0.285995
ODO1(54)	0.809524	-0.304854	1.16578	0.221289
G3P1(217)	0.714286	-0.485427	1.1016	0.139606
ODP1(491)	0.841584	-0.24882	1.20856	0.273284
SYK1(82),SYK2(82)	0.965909	-0.050041	2.57754	1.366
EFG(39)	0.841584	-0.24882	1.21925	0.285995
RBSB(193)	0.809524	-0.304854	1.17647	0.234466
CH60(117)	1.1039	0.142605	0.705882	-0.502501
ENO(419)	0.825243	-0.27711	1.19786	0.260461
SERA(133)	1.44068	0.526747	0.909091	-0.137503
TPX(128)	1.51786	0.602035	0.919786	-0.12063
GSHR(199)	0.625	-0.678072	1.08021	0.111317
EFTU1(209),EFTU2(209)	1.7	0.765535	0.930481	-0.103951
EFG(134)	0.841584	-0.24882	1.25134	0.32347
SYH(65)	0.639098	-0.645892	1.09091	0.125531
DBHA(3)	0.85	-0.234466	1.27273	0.347923
ODO2(133)	0.841584	-0.24882	1.26203	0.335748
CAPP(693)	0.923913	-0.114171	1.66845	0.738508
RS7(76)	0.85	-0.234466	1.28342	0.359996
YDJA(40)	0.68	-0.556393	1.1123	0.153545
RL11(51)	0.944444	-0.082463	2.06417	1.04556
EFTU1(25),EFTU2(25)	0.615942	-0.699133	1.09091	0.125531
FABI(43)	0.885416	-0.175572	1.42246	0.508388
MDH(99)	0.708333	-0.4975	1.13369	0.181026
GMHA(22)	1.13333	0.180572	0.705882	-0.502501
AK1H(42)	0.464481	-1.10631	1.05882	0.082463
ENO(2)	1.08974	0.123989	0.59893	-0.739541
AROG(237)	0.801887	-0.31853	1.22995	0.298596
SERA(224)	0.825243	-0.27711	1.27273	0.347923
DHE4(16)	0.739131	-0.436099	1.16578	0.221289
GRPE(90)	0.574324	-0.800062	1.09091	0.125531
SERC(326)	0.876289	-0.190521	1.44385	0.529921
LON(761)	1.19718	0.259644	0.759358	-0.397148
EFG(504)	0.787037	-0.345496	1.22995	0.298596
PUR8(437)	0.867347	-0.205319	1.42246	0.508388
METK(284)	1.34921	0.432112	0.84492	-0.243113
ENO(195)	0.559211	-0.838536	1.09091	0.125531
SERC(44)	0.885416	-0.175572	1.51872	0.602853
ENO(6)	1.08974	0.123989	0.545455	-0.874468
CISY(405)	0.508982	-0.974313	1.08021	0.111317
DHE4(224)	0.752212	-0.410788	1.20856	0.273284
METK(222)	0.625	-0.678072	1.12299	0.167352
KPYK2(75)	0.817308	-0.291048	1.31551	0.39562
TRPA(239)	0.876289	-0.190521	1.52941	0.612977
AAT(355)	0.374449	-1.41716	1.05882	0.082463
DAPD(1)	1.21429	0.280109	0.748663	-0.417612
ZNUA(111)	0.876289	-0.190521	1.54011	0.623031
G3P1(138)	0.739131	-0.436099	1.20856	0.273284
PTHP(49)	0.867347	-0.205319	1.49733	0.582388
RL1(31)	0.885416	-0.175572	1.62567	0.701033
FABZ(58)	1.28788	0.364996	0.791444	-0.337441
SKP(39)	0.779816	-0.358793	1.27273	0.347923
DHE4(1)	0.674603	-0.567889	1.16578	0.221289
YIFE(30)	0.787037	-0.345496	1.29412	0.371969
PNP(606)	2.36111	1.23947	0.930481	-0.103951
EFEO(170)	1.41667	0.502501	0.834225	-0.261492
RL7/12(71)	0.817308	-0.291048	1.36898	0.453106
AAT(42)	0.625	-0.678072	1.14438	0.194572
RL2(111)	0.85	-0.234466	1.48663	0.572047
GLNA(384)	0.913978	-0.129768	2.07487	1.05302
SYA(585)	1.84783	0.88583	0.898396	-0.154577
ALF(72)	0.611511	-0.70955	1.14438	0.194572
RL1(141)	0.867347	-0.205319	1.60428	0.681924
HTPG(45)	0.49133	-1.02524	1.1016	0.139606
CISY(283)	0.406698	-1.29797	1.08021	0.111317
TALB(294)	1.30769	0.387023	0.770053	-0.37697
NUSA(22)	0.944444	-0.082463	3.42246	1.77503
TRPB(167)	0.801887	-0.31853	1.37968	0.464333
EFTU1(90),EFTU2(90)	1.41667	0.502501	0.812834	-0.298967
PUR8(182)	0.825243	-0.27711	1.46524	0.551138
SERA(141)	0.85	-0.234466	1.57219	0.652778
RL22(49)	0.858586	-0.219966	1.62567	0.701033
GLYA(405)	1.23188	0.300866	0.695187	-0.524527
MASY(101)	0.414634	-1.27009	1.09091	0.125531
RS6(93)	0.867347	-0.205319	1.7754	0.828145
SYT(122)	1.23188	0.300866	0.673797	-0.569614
ALF(231)	0.732759	-0.44859	1.30481	0.383843
DAPA(242)	0.720339	-0.473252	1.29412	0.371969
DAPD(241)	0.801887	-0.31853	1.47594	0.56163
FABD(173)	0.440415	-1.18307	1.1123	0.153545
ODP2(587)	0.521472	-0.939337	1.14438	0.194572
ALKH(24)	0.582192	-0.780434	1.17647	0.234466
RL7/12(85)	0.809524	-0.304854	1.58289	0.662559
RS1(528)	0.858586	-0.219966	1.91444	0.936922
YIFE(49)	0.809524	-0.304854	1.61497	0.69151
EFG(555)	0.691057	-0.533124	1.31551	0.39562
PYRB(85)	0.913978	-0.129768	3.24064	1.69628
SODM(135)	1.97675	0.983127	0.855615	-0.224966
RL9(22)	0.85	-0.234466	1.94652	0.9609
RL6(138)	0.923913	-0.114171	3.97861	1.99226
ZNUA(286)	0.758929	-0.397964	1.48663	0.572047
NDK(11)	0.867347	-0.205319	2.17112	1.11844
SYN(114)	0.794392	-0.332077	1.62567	0.701033
YBFF(240)	0.590278	-0.760534	1.24064	0.311087
SUCD(43)	0.745614	-0.423499	1.47594	0.56163
6PGD(260)	0.551948	-0.857396	1.21925	0.285995
ZNUA(116)	0.867347	-0.205319	2.29947	1.2013
TALA(63)	0.285235	-1.80978	1.1016	0.139606
RS2(81)	0.772727	-0.371969	1.60428	0.681924
AHPC(151)	0.685484	-0.544806	1.40107	0.486529
IDH(235)	0.714286	-0.485427	1.48663	0.572047
RS5(86)	0.720339	-0.473252	1.51872	0.602853
CH60(15)	0.674603	-0.567889	1.42246	0.508388
DCDA(154)	1.46552	0.55141	0.695187	-0.524527
BCP(40)	0.841584	-0.24882	2.24599	1.16735
RL5(9)	0.809524	-0.304854	1.95722	0.968805
PURE(123)	0.758929	-0.397964	1.68984	0.756887
GLNA(2)	1.93182	0.949959	0.802139	-0.318076
XGPT(72)	3.03571	1.60204	0.877005	-0.189343
UVRA(614)	1.66667	0.736966	0.748663	-0.417612
GUAA(381)	0.559211	-0.838536	1.30481	0.383843
HNS(120)	1.88889	0.917537	0.780749	-0.357069
RL29(54)	0.913978	-0.129768	6.65241	2.73388
IMDH(428)	1.21429	0.280109	0.406417	-1.29897
GUAA(309)	1.34921	0.432112	0.524064	-0.932185
AROK(160)	0.858586	-0.219966	3.65775	1.87096
SKP(115)	1.73469	0.79468	0.695187	-0.524527
ODP2(92)	1.26866	0.343302	0.427807	-1.22497
PYRH(212)	2.65625	1.40939	0.812834	-0.298967
CAPP(17)	0.787037	-0.345496	2.34225	1.22789
GLNB(40)	1.34921	0.432112	0.502674	-0.992305
RL18(85)	5	2.32193	0.877005	-0.189343
DBHA(51)	0.817308	-0.291048	2.91979	1.54586
RS7(114)	1.25	0.321928	0.374332	-1.41761
ILVC(145)	1.7	0.765535	0.641711	-0.640004
RMLC(168)	0.817308	-0.291048	3.43316	1.77954
ALF(115)	0.477528	-1.06634	1.41176	0.4975
EFG(77)	2.17949	1.12399	0.716578	-0.480804
MDH(272)	1.88889	0.917537	0.663102	-0.592697
DHAS(84)	1.34921	0.432112	0.417112	-1.26149
EFG(23)	0.574324	-0.800062	1.65775	0.72923
MDH(301)	0.708333	-0.4975	2.27807	1.18782
GLPK(4)	1.28788	0.364996	0.31016	-1.68891
RL13(85)	0.779816	-0.358793	3.30481	1.72457
PT1(404)	1.60377	0.681471	0.524064	-0.932185
3PASE(275)	2.02381	1.01707	0.631016	-0.664252
GLYA(293)	2.07317	1.05184	0.59893	-0.739541
YBIX(41)	0.685484	-0.544806	2.72727	1.44746
PNP(397)	0.714286	-0.485427	3.12299	1.64293
RL3(190)	0.658915	-0.601836	2.54546	1.34792
CH10(74)	0.288136	-1.79518	1.45454	0.540568
RS9(129)	2.36111	1.23947	0.57754	-0.792007
ODO1(834)	2.93104	1.55141	0.620321	-0.688913
HINT(9)	0.381166	-1.39151	1.76471	0.819428
PT1(1)	2.36111	1.23947	0.524064	-0.932185
SODM(69)	2.23684	1.16146	0.491979	-1.02333
ZNUA(95)	0.685484	-0.544806	4.73797	2.24427
HNS(6)	0.658915	-0.601836	4.85562	2.27965
KPYK2(267)	1.80851	0.854803	0.28877	-1.79201
ALKH(202)	2.93104	1.55141	0.470588	-1.08746
CH10(34)	0.367965	-1.44236	2.28877	1.19457
PTKB(59)	5	2.32193	0.566845	-0.818974
ARGD(156)	0.305755	-1.70955	2.93048	1.55114
RL2(150)	0.408654	-1.29105	4.62032	2.20799
RS18(38)	0.420792	-1.24882	4.8877	2.28916
PUR9(287)	2.93104	1.55141	0.26738	-1.90304
GLPK(143)	5.31251	2.40939	0.363636	-1.45943
RS12(108)	0.315985	-1.66207	5.75401	2.52457
IF1(42)	0.233516	-2.0984	5.54011	2.46991
