# Supplementary figures and images for: Trifunctional cross-linker for mapping protein-protein interaction networks and comparing protein conformational states
Source: eLife journal article supplement (doi:10.7554/elife.12509), 2016-03-03

**A**

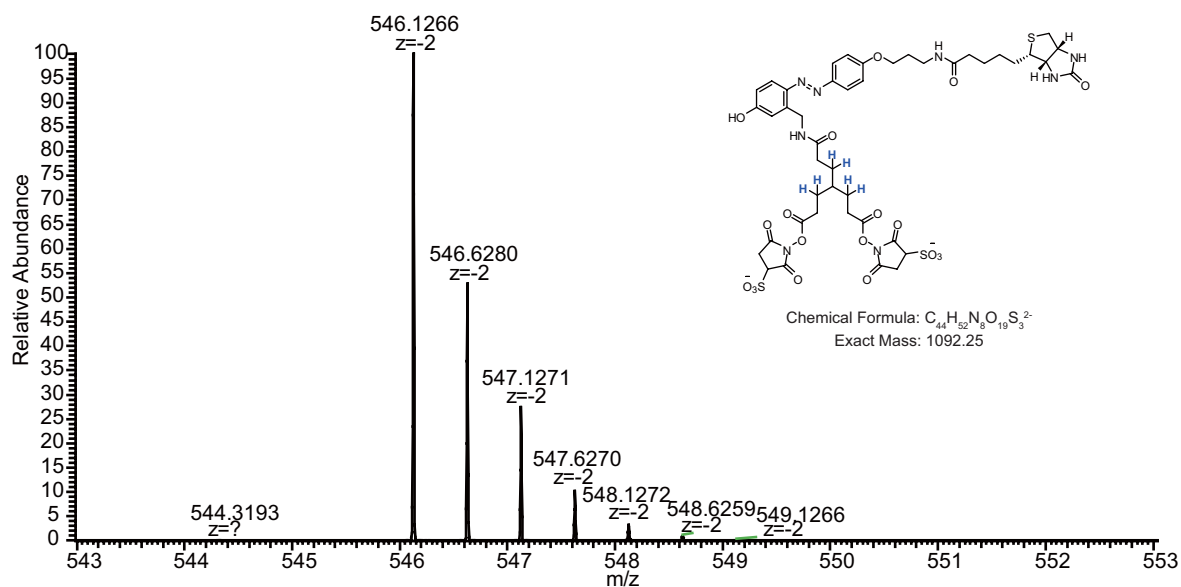

**B**

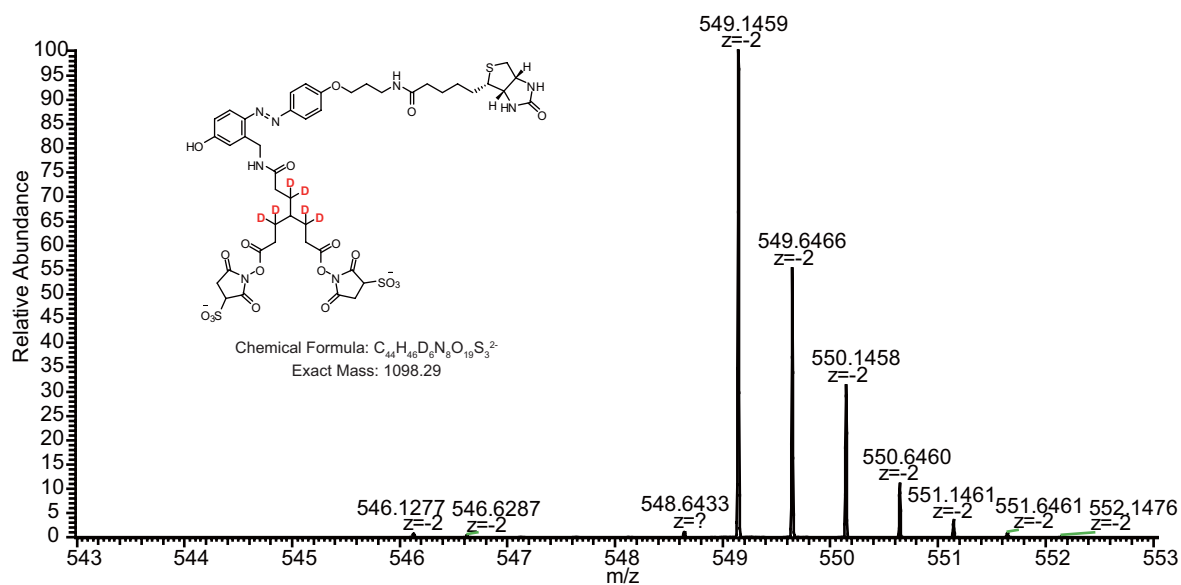

**Figure 1—figure supplement 6. MS1 spectra of (A) [d<sub>0</sub>]-bAL2 and (B) [d<sub>6</sub>]-bAL2.**

Supplement: supp [file elife-12509-supp-v1.zip › elife_poa_e12509_Figure_1_figure_supplement_6.pdf]

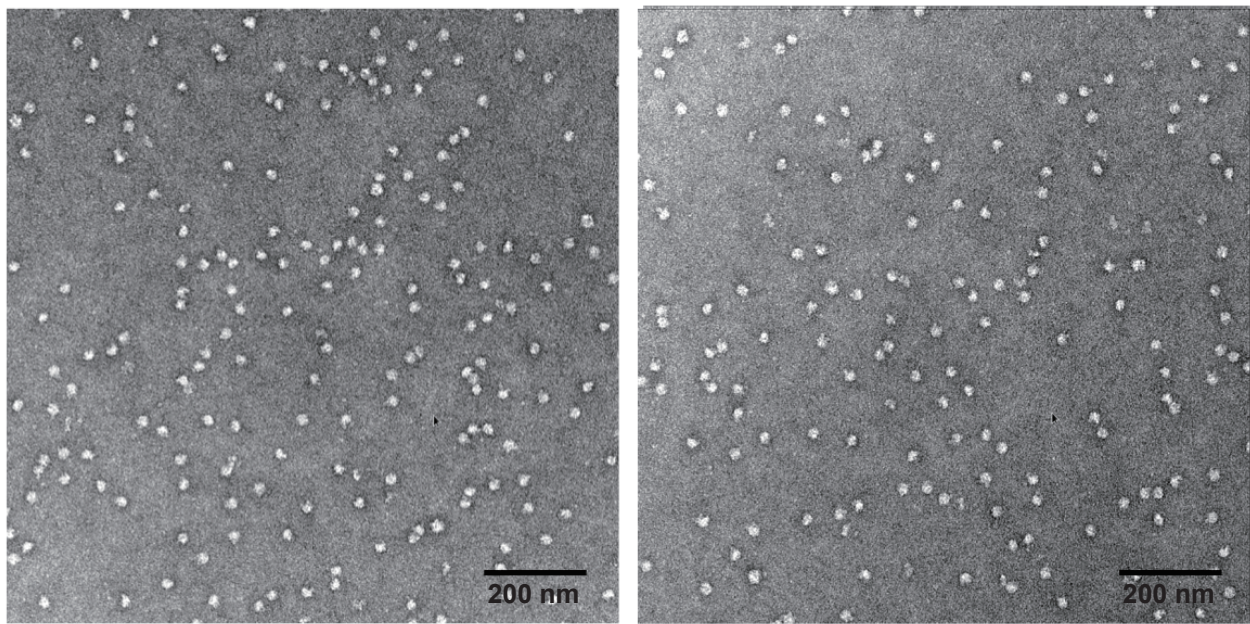

49,000 x

**Figure 4—figure supplement 3. Negative staining of non-cross-linked *E. coli* 70S ribosome.**

Supplement: supp [file elife-12509-supp-v1.zip › elife_poa_e12509_Figure_4_figure_supplement_3.pdf]
